# Supplementary material for: Sex differences in gene expression and alternative splicing in the Chinese horseshoe bat
Source: PeerJ. 2023 Apr 24;11:e15231. doi: 10.7717/peerj.15231 (PMC10135408; doi:10.7717/peerj.15231)
Supplement: Supplemental Information 5 — Significant terms and pathways with the q-value of 0.05 were shown in bold. Highlighted terms are those representatives after removing the redundancy. Log (q-value) of −1.3 is equal to q-value of 0.05. Terms and pathways with uncorrected p < 0.01 were also shown. Log (p-value) of −2.2 is equal to p-value of 0.01. [file peerj-11-15231-s005.xlsx]

## Sheet: brain-female-biased-gene-1539
Category	GO	Description	LogP	Hits	Log(q-value)
GO Biological Processes	GO:0006119	oxidative phosphorylation	-16	ATP5F1A|ATP5F1E|ATP5ME|ATP5PO|COX6B1|COX6C|COX7A1|COX7A2P2|COX7B|COX15|DGUOK|MSH2|COX3|CYTB|NDUFA1|NDUFA2|NDUFA3|NDUFA7|NDUFA8|NDUFA9|NDUFB4|NDUFB5|NDUFB6|NDUFB8|NDUFC2|NDUFS4|NDUFS5|SDHB|SDHD|SNCA|UQCRH|COX7A2L|COX5A|ATP5MF|ATP5PD|ATP5MG|UQCRQ|UQCR10|STOML2|NDUFA13|CYCS|NDUFB11|NDUFA12|TEFM|COA6	-13
GO Biological Processes	GO:0009205	purine ribonucleoside triphosphate metabolic process	-14	NUDT2|ATP5F1A|ATP5F1E|ATP5MC1|ATP5MC3|ATP5ME|ATP5PO|DGUOK|ITPA|NDUFA1|NDUFA2|NDUFA3|NDUFA7|NDUFA8|NDUFA9|NDUFB4|NDUFB5|NDUFB6|NDUFB8|NDUFC2|NDUFS4|NDUFS5|NME1|RAN|SDHB|SDHD|ATP5MF|SLC25A13|NME6|ATP5PD|ATP5MG|DMAC2L|NME7|STOML2|NDUFA13|RAB23|NDUFB11|MFN1|NDUFA12|ATP5MK|AK9	-11
GO Biological Processes	GO:0009206	purine ribonucleoside triphosphate biosynthetic process	-14	NUDT2|ATP5F1A|ATP5F1E|ATP5MC1|ATP5MC3|ATP5ME|ATP5PO|DGUOK|NDUFA1|NDUFA2|NDUFA3|NDUFA7|NDUFA8|NDUFA9|NDUFB4|NDUFB5|NDUFB6|NDUFB8|NDUFC2|NDUFS4|NDUFS5|NME1|SDHB|SDHD|ATP5MF|SLC25A13|NME6|ATP5PD|ATP5MG|DMAC2L|NME7|STOML2|NDUFA13|NDUFB11|NDUFA12|ATP5MK|AK9	-11
GO Biological Processes	GO:0009145	purine nucleoside triphosphate biosynthetic process	-14	NUDT2|ATP5F1A|ATP5F1E|ATP5MC1|ATP5MC3|ATP5ME|ATP5PO|DGUOK|NDUFA1|NDUFA2|NDUFA3|NDUFA7|NDUFA8|NDUFA9|NDUFB4|NDUFB5|NDUFB6|NDUFB8|NDUFC2|NDUFS4|NDUFS5|NME1|SDHB|SDHD|ATP5MF|SLC25A13|NME6|ATP5PD|ATP5MG|DMAC2L|NME7|STOML2|NDUFA13|NDUFB11|NDUFA12|ATP5MK|AK9	-11
GO Biological Processes	GO:0009144	purine nucleoside triphosphate metabolic process	-14	NUDT2|ATP5F1A|ATP5F1E|ATP5MC1|ATP5MC3|ATP5ME|ATP5PO|DGUOK|ITPA|NDUFA1|NDUFA2|NDUFA3|NDUFA7|NDUFA8|NDUFA9|NDUFB4|NDUFB5|NDUFB6|NDUFB8|NDUFC2|NDUFS4|NDUFS5|NME1|RAN|SDHB|SDHD|ATP5MF|SLC25A13|NME6|ATP5PD|ATP5MG|DMAC2L|NME7|STOML2|NDUFA13|RAB23|NDUFB11|MFN1|NDUFA12|ATP5MK|AK9	-11
GO Biological Processes	GO:0006412	translation	-13	DDX3X|EEF1B2|EIF4A1|ETF1|HARS1|IARS1|EIF6|MARS1|NDUFA7|RARS1|ABCE1|RPL7|RPL9|RPL10|RPL11|RPL17|RPL18|RPL23A|MRPL23|RPL24|RPL27|RPL30|RPL27A|RPL29|RPL31|RPL32|RPL34|RPL35A|RPL37|RPL37A|RPL38|RPL39|RPS3|RPS8|RPS12|RPS13|RPS17|RPS19|RPS20|RPS21|RPS23|RPS24|RPS27|RPS27A|RPS28|RPS29|TARS1|EIF4H|DENR|YARS1|EIF3J|EIF2S2|RPL23|MRPL33|MRPL19|FARSB|EIF1|COPS5|MRPL3|HARS2|LTN1|MRPL42|MRPL13|MRPL18|EEF2K|MRP…	-10
GO Biological Processes	GO:0009199	ribonucleoside triphosphate metabolic process	-13	NUDT2|ATP5F1A|ATP5F1E|ATP5MC1|ATP5MC3|ATP5ME|ATP5PO|DGUOK|ITPA|NDUFA1|NDUFA2|NDUFA3|NDUFA7|NDUFA8|NDUFA9|NDUFB4|NDUFB5|NDUFB6|NDUFB8|NDUFC2|NDUFS4|NDUFS5|NME1|RAN|SDHB|SDHD|ATP5MF|SLC25A13|NME6|ATP5PD|ATP5MG|DMAC2L|NME7|STOML2|NDUFA13|RAB23|NDUFB11|MFN1|NDUFA12|ATP5MK|AK9	-10
GO Biological Processes	GO:0006754	ATP biosynthetic process	-13	NUDT2|ATP5F1A|ATP5F1E|ATP5MC1|ATP5MC3|ATP5ME|ATP5PO|DGUOK|NDUFA1|NDUFA2|NDUFA3|NDUFA7|NDUFA8|NDUFA9|NDUFB4|NDUFB5|NDUFB6|NDUFB8|NDUFC2|NDUFS4|NDUFS5|SDHB|SDHD|ATP5MF|SLC25A13|ATP5PD|ATP5MG|DMAC2L|STOML2|NDUFA13|NDUFB11|NDUFA12|ATP5MK|AK9	-10
GO Biological Processes	GO:0009201	ribonucleoside triphosphate biosynthetic process	-13	NUDT2|ATP5F1A|ATP5F1E|ATP5MC1|ATP5MC3|ATP5ME|ATP5PO|DGUOK|NDUFA1|NDUFA2|NDUFA3|NDUFA7|NDUFA8|NDUFA9|NDUFB4|NDUFB5|NDUFB6|NDUFB8|NDUFC2|NDUFS4|NDUFS5|NME1|SDHB|SDHD|ATP5MF|SLC25A13|NME6|ATP5PD|ATP5MG|DMAC2L|NME7|STOML2|NDUFA13|NDUFB11|NDUFA12|ATP5MK|AK9	-10
GO Biological Processes	GO:0009060	aerobic respiration	-13	ACO1|ATP5F1A|ATP5F1E|ATP5ME|ATP5PO|COX6B1|COX6C|COX7A1|COX7A2P2|COX7B|COX15|DGUOK|DLAT|MSH2|COX3|CYTB|NDUFA1|NDUFA2|NDUFA3|NDUFA7|NDUFA8|NDUFA9|NDUFB4|NDUFB5|NDUFB6|NDUFB8|NDUFC2|NDUFS4|NDUFS5|SDHB|SDHD|SNCA|UQCRH|SUCLG1|SUCLA2|COX7A2L|COX5A|ATP5MF|ATP5PD|ATP5MG|UQCRQ|UQCR10|STOML2|NDUFA13|CYCS|NDUFB11|NDUFA12|TEFM|COA6	-10
GO Biological Processes	GO:0046034	ATP metabolic process	-13	NUDT2|ATP5F1A|ATP5F1E|ATP5MC1|ATP5MC3|ATP5ME|ATP5PO|COX6B1|COX6C|COX7A1|COX7A2P2|COX7B|COX15|DGUOK|MSH2|COX3|CYTB|NDUFA1|NDUFA2|NDUFA3|NDUFA7|NDUFA8|NDUFA9|NDUFB4|NDUFB5|NDUFB6|NDUFB8|NDUFC2|NDUFS4|NDUFS5|PFKFB2|PGK1|SDHB|SDHD|SNCA|UQCRH|COX7A2L|COX5A|ATP5MF|SLC25A13|ATP5PD|ATP5MG|NUDT5|UQCRQ|DMAC2L|UQCR10|STOML2|NDUFA13|CYCS|NDUFB11|NDUFA12|FIGNL1|TEFM|ATP5MK|AK9|COA6	-9.7
GO Biological Processes	GO:0002181	cytoplasmic translation	-12	EIF4A1|ETF1|RPL7|RPL9|RPL10|RPL11|RPL17|RPL18|RPL23A|RPL24|RPL27|RPL30|RPL27A|RPL29|RPL31|RPL32|RPL34|RPL35A|RPL37|RPL37A|RPL38|RPL39|RPS3|RPS8|RPS12|RPS13|RPS17|RPS19|RPS20|RPS21|RPS23|RPS24|RPS27|RPS27A|RPS28|RPS29|EIF4H|DENR|EIF3J|EIF2S2|RPL23|RPL22L1	-9.5
GO Biological Processes	GO:0043043	peptide biosynthetic process	-12	DDX3X|EEF1B2|EIF4A1|ETF1|HARS1|IARS1|EIF6|MARS1|NDUFA7|RARS1|ABCE1|RPL7|RPL9|RPL10|RPL11|RPL17|RPL18|RPL23A|MRPL23|RPL24|RPL27|RPL30|RPL27A|RPL29|RPL31|RPL32|RPL34|RPL35A|RPL37|RPL37A|RPL38|RPL39|RPS3|RPS8|RPS12|RPS13|RPS17|RPS19|RPS20|RPS21|RPS23|RPS24|RPS27|RPS27A|RPS28|RPS29|TARS1|EIF4H|DENR|YARS1|EIF3J|EIF2S2|RPL23|MRPL33|MRPL19|FARSB|EIF1|COPS5|MRPL3|HARS2|LTN1|MRPL42|MRPL13|MRPL18|EEF2K|MRP…	-9.4
GO Biological Processes	GO:0022613	ribonucleoprotein complex biogenesis	-12	DDX3X|EIF6|PIN4|PWP2|RAN|ABCE1|RPL7|RPL10|RPL11|RPL23A|RPL24|RPL27|RPL35A|RPL38|RPS8|RPS17|RPS19|RPS21|RPS24|RPS27|RPS28|SRSF1|SRSF5|SRSF6|SMN1|SNRPD2|SNRPF|SNRPG|SRPK2|TAF9|EIF4H|XPO1|DDX39B|SF3A2|ZRSR2|CUL4B|PRPF18|DENR|EIF3J|SRSF9|EIF2S2|PRPF3|RRP9|NOLC1|RBM5|MPHOSPH6|DDX17|RPP30|PTGES3|RPP40|TXNL4A|NUDT21|CPSF6|LSM6|RRP1B|RRP8|MTREX|ZNF658|UTP20|MTERF3|UTP18|TFB1M|UTP11|POP5|LUC7L3|NLE1|GNL3L…	-9.2
GO Biological Processes	GO:0006518	peptide metabolic process	-12	DDX3X|EEF1B2|EIF4A1|ETF1|GSTA4|GSTM3|HARS1|IARS1|EIF6|MARS1|NDUFA7|RARS1|ABCE1|RPL7|RPL9|RPL10|RPL11|RPL17|RPL18|RPL23A|MRPL23|RPL24|RPL27|RPL30|RPL27A|RPL29|RPL31|RPL32|RPL34|RPL35A|RPL37|RPL37A|RPL38|RPL39|RPS3|RPS8|RPS12|RPS13|RPS17|RPS19|RPS20|RPS21|RPS23|RPS24|RPS27|RPS27A|RPS28|RPS29|SCG5|TARS1|EIF4H|DENR|YARS1|EIF3J|EIF2S2|RPL23|GSTO1|MRPL33|ECE2|SPCS2|MRPL19|FARSB|ATP6AP2|EIF1|ABCA7|CPQ|A…	-8.9
GO Biological Processes	GO:0045333	cellular respiration	-12	ACO1|ATP5F1A|ATP5F1E|ATP5ME|ATP5PO|COX6B1|COX6C|COX7A1|COX7A2P2|COX7B|COX15|DGUOK|DLAT|ETFA|MSH2|COX3|CYTB|NDUFA1|NDUFA2|NDUFA3|NDUFA7|NDUFA8|NDUFA9|NDUFB4|NDUFB5|NDUFB6|NDUFB8|NDUFC2|NDUFS4|NDUFS5|SDHB|SDHD|SNCA|UQCRH|SUCLG1|SUCLA2|COX7A2L|COX5A|ATP5MF|SLC25A13|ATP5PD|ATP5MG|UQCRQ|UQCR10|STOML2|NDUFA13|CYCS|NDUFB11|NDUFA12|TEFM|LYRM7|COA6	-8.8
GO Biological Processes	GO:0042775	mitochondrial ATP synthesis coupled electron transport	-11	COX6B1|COX6C|COX7A1|COX7A2P2|COX7B|COX15|DGUOK|COX3|CYTB|NDUFA1|NDUFA2|NDUFA3|NDUFA7|NDUFA8|NDUFA9|NDUFB4|NDUFB5|NDUFB6|NDUFB8|NDUFC2|NDUFS4|NDUFS5|SDHB|SDHD|SNCA|UQCRH|COX7A2L|COX5A|UQCRQ|UQCR10|CYCS|NDUFA12|COA6	-8.6
GO Biological Processes	GO:0042773	ATP synthesis coupled electron transport	-11	COX6B1|COX6C|COX7A1|COX7A2P2|COX7B|COX15|DGUOK|COX3|CYTB|NDUFA1|NDUFA2|NDUFA3|NDUFA7|NDUFA8|NDUFA9|NDUFB4|NDUFB5|NDUFB6|NDUFB8|NDUFC2|NDUFS4|NDUFS5|SDHB|SDHD|SNCA|UQCRH|COX7A2L|COX5A|UQCRQ|UQCR10|CYCS|NDUFA12|COA6	-8.6
GO Biological Processes	GO:0009141	nucleoside triphosphate metabolic process	-11	NUDT2|ATP5F1A|ATP5F1E|ATP5MC1|ATP5MC3|ATP5ME|ATP5PO|DGUOK|ITPA|NDUFA1|NDUFA2|NDUFA3|NDUFA7|NDUFA8|NDUFA9|NDUFB4|NDUFB5|NDUFB6|NDUFB8|NDUFC2|NDUFS4|NDUFS5|NME1|RAN|SDHB|SDHD|ATP5MF|SLC25A13|NME6|ATP5PD|ATP5MG|DMAC2L|NME7|STOML2|RRM2B|NDUFA13|RAB23|NDUFB11|MFN1|NDUFA12|ATP5MK|AK9	-8.4
GO Biological Processes	GO:0015986	proton motive force-driven ATP synthesis	-11	ATP5F1A|ATP5F1E|ATP5MC1|ATP5MC3|ATP5ME|ATP5PO|NDUFA1|NDUFA2|NDUFA3|NDUFA7|NDUFA8|NDUFA9|NDUFB4|NDUFB5|NDUFB6|NDUFB8|NDUFC2|NDUFS4|NDUFS5|SDHB|SDHD|ATP5MF|ATP5PD|ATP5MG|STOML2|NDUFA13|NDUFB11|NDUFA12|ATP5MK	-8.3
GO Biological Processes	GO:0009142	nucleoside triphosphate biosynthetic process	-11	NUDT2|ATP5F1A|ATP5F1E|ATP5MC1|ATP5MC3|ATP5ME|ATP5PO|DGUOK|NDUFA1|NDUFA2|NDUFA3|NDUFA7|NDUFA8|NDUFA9|NDUFB4|NDUFB5|NDUFB6|NDUFB8|NDUFC2|NDUFS4|NDUFS5|NME1|SDHB|SDHD|ATP5MF|SLC25A13|NME6|ATP5PD|ATP5MG|DMAC2L|NME7|STOML2|NDUFA13|NDUFB11|NDUFA12|ATP5MK|AK9	-8.2
GO Biological Processes	GO:0015980	energy derivation by oxidation of organic compounds	-11	ACO1|ADRB3|AGL|ATP5F1A|ATP5F1E|ATP5ME|ATP5PO|COX6B1|COX6C|COX7A1|COX7A2P2|COX7B|COX15|DGUOK|DLAT|ETFA|LEPR|MSH2|MT3|COX3|CYTB|NDUFA1|NDUFA2|NDUFA3|NDUFA7|NDUFA8|NDUFA9|NDUFB4|NDUFB5|NDUFB6|NDUFB8|NDUFC2|NDUFS4|NDUFS5|PPP1CB|PPP1R1A|PPP1R3C|SDHB|SDHD|SNCA|UGP2|UQCRH|SUCLG1|SUCLA2|COX7A2L|COX5A|ATP5MF|SLC25A13|ATP5PD|ATP5MG|PTGES3|UQCRQ|UQCR10|STOML2|NDUFA13|CYCS|NDUFB11|NDUFA12|TEFM|LYRM7|COA6	-8.1
GO Biological Processes	GO:0042776	proton motive force-driven mitochondrial ATP synthesis	-10	ATP5F1A|ATP5F1E|ATP5ME|ATP5PO|NDUFA1|NDUFA2|NDUFA3|NDUFA7|NDUFA8|NDUFA9|NDUFB4|NDUFB5|NDUFB6|NDUFB8|NDUFC2|NDUFS4|NDUFS5|SDHB|SDHD|ATP5MF|ATP5PD|ATP5MG|STOML2|NDUFA13|NDUFB11|NDUFA12	-7.6
GO Biological Processes	GO:0033108	mitochondrial respiratory chain complex assembly	-10	NDUFA1|NDUFA2|NDUFA3|NDUFA8|NDUFA9|NDUFB4|NDUFB5|NDUFB6|NDUFB8|NDUFC2|NDUFS4|NDUFS5|AIFM1|COX17|NDUFAF4|NDUFA13|COX16|NDUFB11|NDUFA12|NDUFAF5|NUBPL|TMEM126A|SLC25A33|UQCC2|COX14|LYRM7|DMAC1|NDUFAF2|SMIM20|COA5|C12orf73|PET100	-7.4
GO Biological Processes	GO:0022904	respiratory electron transport chain	-9.7	COX6B1|COX6C|COX7A1|COX7A2P2|COX7B|COX15|DGUOK|ETFA|COX3|CYTB|NDUFA1|NDUFA2|NDUFA3|NDUFA7|NDUFA8|NDUFA9|NDUFB4|NDUFB5|NDUFB6|NDUFB8|NDUFC2|NDUFS4|NDUFS5|SDHB|SDHD|SNCA|UQCRH|COX7A2L|COX5A|SLC25A13|UQCRQ|UQCR10|CYCS|NDUFA12|COA6	-7
GO Biological Processes	GO:0006091	generation of precursor metabolites and energy	-9.6	ACO1|ADH5|ADRB3|AGL|ALDH2|SLC25A4|ATP5F1A|ATP5F1E|ATP5ME|ATP5PO|COX6B1|COX6C|COX7A1|COX7A2P2|COX7B|COX15|CYB561|DGUOK|DLAT|ETFA|FDX1|LEPR|MSH2|MT3|COX3|CYTB|NDUFA1|NDUFA2|NDUFA3|NDUFA7|NDUFA8|NDUFA9|NDUFB4|NDUFB5|NDUFB6|NDUFB8|NDUFC2|NDUFS4|NDUFS5|PFKFB2|PGK1|POMC|PPP1CB|PPP1R1A|PPP1R3C|QDPR|RPE|SDHB|SDHD|SNCA|UGP2|UQCRH|SUCLG1|SUCLA2|COX7A2L|COX5A|ATP5MF|COX17|SLC25A13|ATP5PD|ATP5MG|PTGES3|RPIA|…	-7
GO Biological Processes	GO:0019646	aerobic electron transport chain	-9.3	COX6B1|COX6C|COX7A1|COX7A2P2|COX7B|COX15|COX3|CYTB|NDUFA1|NDUFA2|NDUFA3|NDUFA7|NDUFA8|NDUFA9|NDUFB4|NDUFB5|NDUFB6|NDUFB8|NDUFC2|NDUFS4|NDUFS5|SDHB|SDHD|UQCRH|COX7A2L|COX5A|UQCRQ|UQCR10|CYCS	-6.6
GO Biological Processes	GO:0043604	amide biosynthetic process	-8.8	ASAH1|ASL|DDX3X|DLAT|EEF1B2|EIF4A1|ETF1|ACSL4|HARS1|IARS1|EIF6|MARS1|NDUFA7|RARS1|ABCE1|RPL7|RPL9|RPL10|RPL11|RPL17|RPL18|RPL23A|MRPL23|RPL24|RPL27|RPL30|RPL27A|RPL29|RPL31|RPL32|RPL34|RPL35A|RPL37|RPL37A|RPL38|RPL39|RPS3|RPS8|RPS12|RPS13|RPS17|RPS19|RPS20|RPS21|RPS23|RPS24|RPS27|RPS27A|RPS28|RPS29|TARS1|EIF4H|DENR|YARS1|EIF3J|EIF2S2|VAPA|RPL23|SPTLC2|MRPL33|MRPL19|FARSB|EIF1|COPS5|MRPL3|HARS2|LT…	-6.1
GO Biological Processes	GO:0042254	ribosome biogenesis	-8.8	DDX3X|EIF6|PIN4|PWP2|RAN|ABCE1|RPL7|RPL10|RPL11|RPL23A|RPL24|RPL27|RPL35A|RPL38|RPS8|RPS17|RPS19|RPS21|RPS24|RPS27|RPS28|XPO1|CUL4B|RRP9|NOLC1|MPHOSPH6|DDX17|RPP30|RPP40|LSM6|RRP1B|RRP8|MTREX|ZNF658|UTP20|MTERF3|UTP18|TFB1M|UTP11|POP5|NLE1|GNL3L|ZNHIT6|HEATR3|NOL8|HEATR1|SDAD1|NHP2|RIOK2|UTP3|TFB2M|MRPL36|ERI3|LAS1L|NIFK|SLX9|TSR2|HELB|MALSU1|EXOSC6|MTERF4|RPL7L1|RBIS	-6.1
GO Biological Processes	GO:0022900	electron transport chain	-8.5	ADH5|ALDH2|COX6B1|COX6C|COX7A1|COX7A2P2|COX7B|COX15|CYB561|DGUOK|ETFA|FDX1|COX3|CYTB|NDUFA1|NDUFA2|NDUFA3|NDUFA7|NDUFA8|NDUFA9|NDUFB4|NDUFB5|NDUFB6|NDUFB8|NDUFC2|NDUFS4|NDUFS5|QDPR|SDHB|SDHD|SNCA|UQCRH|COX7A2L|COX5A|SLC25A13|UQCRQ|UQCR10|GLRX2|CYCS|NDUFA12|FDX2|COA6	-5.9
GO Biological Processes	GO:0009152	purine ribonucleotide biosynthetic process	-8.2	NUDT2|ATP5F1A|ATP5F1E|ATP5MC1|ATP5MC3|ATP5ME|ATP5PO|DGUOK|DLAT|ACSL4|GART|HPRT1|NDUFA1|NDUFA2|NDUFA3|NDUFA7|NDUFA8|NDUFA9|NDUFB4|NDUFB5|NDUFB6|NDUFB8|NDUFC2|NDUFS4|NDUFS5|NME1|NPR1|PRPS2|SDHB|SDHD|ATP5MF|SLC25A13|NME6|ATP5PD|ATP5MG|DMAC2L|NME7|STOML2|SLC35B3|NDUFA13|NDUFB11|NDUFA12|PPCDC|ATP5MK|HACD2|AK9	-5.6
GO Biological Processes	GO:0006164	purine nucleotide biosynthetic process	-8.1	NUDT2|ATP5F1A|ATP5F1E|ATP5MC1|ATP5MC3|ATP5ME|ATP5PO|DGUOK|DLAT|ACSL4|GART|HPRT1|NDUFA1|NDUFA2|NDUFA3|NDUFA7|NDUFA8|NDUFA9|NDUFB4|NDUFB5|NDUFB6|NDUFB8|NDUFC2|NDUFS4|NDUFS5|NME1|NPR1|PRPS1|PRPS2|SDHB|SDHD|ATP5MF|SLC25A13|NME6|ATP5PD|ATP5MG|DMAC2L|NME7|STOML2|SLC35B3|NDUFA13|NDUFB11|NDUFA12|PPCDC|ATP5MK|HACD2|AK9	-5.5
GO Biological Processes	GO:0007005	mitochondrion organization	-8	SLC25A4|BCL2L2|COX7A1|COX7A2P2|HSPD1|NDUFA1|NDUFA2|NDUFA3|NDUFA8|NDUFA9|NDUFB4|NDUFB5|NDUFB6|NDUFB8|NDUFC2|NDUFS4|NDUFS5|NECTIN2|SNCA|SSBP1|VDAC2|OGT|AIFM1|COX7A2L|ATG5|DNM1L|COX17|CERT1|TIMM17A|TOMM40|MTX2|YME1L1|GABARAPL2|VPS13A|AGTPBP1|GABARAPL1|HTRA2|TMEM14A|NDUFAF4|STOML2|RRM2B|NDUFA13|COX16|ARMCX3|NDUFB11|TOMM7|TMEM70|ATG2B|MFN1|NDUFA12|NDUFAF5|MAIP1|NUBPL|MAP1LC3B|SLIRP|TMEM126A|SLC25A33|U…	-5.4
GO Biological Processes	GO:0009260	ribonucleotide biosynthetic process	-7.6	NUDT2|ATP5F1A|ATP5F1E|ATP5MC1|ATP5MC3|ATP5ME|ATP5PO|DGUOK|DLAT|ACSL4|GART|HPRT1|NDUFA1|NDUFA2|NDUFA3|NDUFA7|NDUFA8|NDUFA9|NDUFB4|NDUFB5|NDUFB6|NDUFB8|NDUFC2|NDUFS4|NDUFS5|NME1|NPR1|PRPS2|SDHB|SDHD|ATP5MF|SLC25A13|NME6|ATP5PD|ATP5MG|DMAC2L|NME7|STOML2|SLC35B3|NDUFA13|NDUFB11|NDUFA12|PPCDC|ATP5MK|UPRT|HACD2|AK9	-5
GO Biological Processes	GO:0046390	ribose phosphate biosynthetic process	-7.6	NUDT2|ATP5F1A|ATP5F1E|ATP5MC1|ATP5MC3|ATP5ME|ATP5PO|DGUOK|DLAT|ACSL4|GART|HPRT1|NDUFA1|NDUFA2|NDUFA3|NDUFA7|NDUFA8|NDUFA9|NDUFB4|NDUFB5|NDUFB6|NDUFB8|NDUFC2|NDUFS4|NDUFS5|NME1|NPR1|PRPS1|PRPS2|SDHB|SDHD|ATP5MF|SLC25A13|NME6|ATP5PD|ATP5MG|DMAC2L|NME7|STOML2|SLC35B3|NDUFA13|NDUFB11|NDUFA12|PPCDC|ATP5MK|UPRT|HACD2|AK9	-5
GO Biological Processes	GO:0072522	purine-containing compound biosynthetic process	-7.4	NUDT2|ATP5F1A|ATP5F1E|ATP5MC1|ATP5MC3|ATP5ME|ATP5PO|DGUOK|DLAT|ACSL4|GART|HPRT1|NDUFA1|NDUFA2|NDUFA3|NDUFA7|NDUFA8|NDUFA9|NDUFB4|NDUFB5|NDUFB6|NDUFB8|NDUFC2|NDUFS4|NDUFS5|NME1|NPR1|PRPS1|PRPS2|SDHB|SDHD|ATP5MF|SLC25A13|NME6|ATP5PD|ATP5MG|DMAC2L|NME7|STOML2|SLC35B3|NDUFA13|NDUFB11|NDUFA12|PPCDC|ATP5MK|HACD2|AK9	-4.8
GO Biological Processes	GO:0032981	mitochondrial respiratory chain complex I assembly	-7.1	NDUFA1|NDUFA2|NDUFA3|NDUFA8|NDUFA9|NDUFB4|NDUFB5|NDUFB6|NDUFB8|NDUFC2|NDUFS4|NDUFS5|NDUFAF4|NDUFA13|NDUFB11|NDUFA12|NDUFAF5|NUBPL|TMEM126A|DMAC1|NDUFAF2	-4.6
GO Biological Processes	GO:0010257	NADH dehydrogenase complex assembly	-7.1	NDUFA1|NDUFA2|NDUFA3|NDUFA8|NDUFA9|NDUFB4|NDUFB5|NDUFB6|NDUFB8|NDUFC2|NDUFS4|NDUFS5|NDUFAF4|NDUFA13|NDUFB11|NDUFA12|NDUFAF5|NUBPL|TMEM126A|DMAC1|NDUFAF2	-4.6
GO Biological Processes	GO:0043603	cellular amide metabolic process	-7.1	ASAH1|ASL|DDX3X|DLAT|EEF1B2|EIF4A1|ETF1|ACSL4|GSTA4|GSTM3|HARS1|IARS1|EIF6|MARS1|NDUFA7|RARS1|RENBP|ABCE1|RPL7|RPL9|RPL10|RPL11|RPL17|RPL18|RPL23A|MRPL23|RPL24|RPL27|RPL30|RPL27A|RPL29|RPL31|RPL32|RPL34|RPL35A|RPL37|RPL37A|RPL38|RPL39|RPS3|RPS8|RPS12|RPS13|RPS17|RPS19|RPS20|RPS21|RPS23|RPS24|RPS27|RPS27A|RPS28|RPS29|SCG5|TARS1|EIF4H|DENR|YARS1|EIF3J|SUCLG1|SUCLA2|EIF2S2|VAPA|RPL23|TM9SF2|GSTO1|SP…	-4.6
GO Biological Processes	GO:0006397	mRNA processing	-7	CSTF2|DDX5|DHX15|GRSF1|HNRNPA1|HNRNPA2B1|HNRNPH1|HNRNPK|HNRNPU|PNN|PRKACA|SFPQ|SRSF1|SRSF5|SRSF6|SMN1|SNRNP70|SNRPA1|SNRPD2|SNRPF|SNRPG|SRPK2|DDX39B|PABPN1|SF3A2|ZRSR2|TTF2|PRPF18|SRSF9|ZPR1|PRPF4B|PRPF3|SRSF11|ZRANB2|WTAP|RBM19|PQBP1|SUGP2|RBM6|RBM5|DDX17|TXNL4A|HNRNPA0|NUDT21|CPSF6|CLASRP|LSM6|ACIN1|RRP1B|CSTF2T|TARDBP|MTREX|VIRMA|LSM3|RBMX|TRA2A|RSRC1|LSM7|CPSF3|LUC7L3|MAGOHB|LUC7L|THOC2|RPRD1…	-4.4
GO Biological Processes	GO:0009165	nucleotide biosynthetic process	-6.8	NUDT2|ATP5F1A|ATP5F1E|ATP5MC1|ATP5MC3|ATP5ME|ATP5PO|DGUOK|DLAT|ACSL4|GART|HPRT1|NDUFA1|NDUFA2|NDUFA3|NDUFA7|NDUFA8|NDUFA9|NDUFB4|NDUFB5|NDUFB6|NDUFB8|NDUFC2|NDUFS4|NDUFS5|NME1|NPR1|PRPS1|PRPS2|RRM2|SDHB|SDHD|ATP5MF|NAMPT|SLC25A13|NME6|ATP5PD|ATP5MG|DMAC2L|NME7|STOML2|RRM2B|SLC35B3|NDUFA13|NDUFB11|NMRK1|NDUFA12|PPCDC|ATP5MK|NADK2|UPRT|HACD2|AK9	-4.2
GO Biological Processes	GO:0034645	cellular macromolecule biosynthetic process	-6.7	AGL|DDX3X|EEF1B2|EIF4A1|ETF1|HARS1|IARS1|EIF6|MARS1|NDUFA7|PIGF|PPP1R3C|RARS1|ABCE1|RPL7|RPL9|RPL10|RPL11|RPL17|RPL18|RPL23A|MRPL23|RPL24|RPL27|RPL30|RPL27A|RPL29|RPL31|RPL32|RPL34|RPL35A|RPL37|RPL37A|RPL38|RPL39|RPS3|RPS8|RPS12|RPS13|RPS17|RPS19|RPS20|RPS21|RPS23|RPS24|RPS27|RPS27A|RPS28|RPS29|TARS1|UGP2|EIF4H|TUSC3|OGT|DENR|YARS1|EIF3J|B3GALNT1|EIF2S2|RPL23|ATG5|MRPL33|MRPL19|FARSB|EIF1|B3GALT5…	-4.2
GO Biological Processes	GO:1901293	nucleoside phosphate biosynthetic process	-6.6	NUDT2|ATP5F1A|ATP5F1E|ATP5MC1|ATP5MC3|ATP5ME|ATP5PO|DGUOK|DLAT|ACSL4|GART|HPRT1|NDUFA1|NDUFA2|NDUFA3|NDUFA7|NDUFA8|NDUFA9|NDUFB4|NDUFB5|NDUFB6|NDUFB8|NDUFC2|NDUFS4|NDUFS5|NME1|NPR1|PRPS1|PRPS2|RRM2|SDHB|SDHD|ATP5MF|NAMPT|SLC25A13|NME6|ATP5PD|ATP5MG|DMAC2L|NME7|STOML2|RRM2B|SLC35B3|NDUFA13|NDUFB11|NMRK1|NDUFA12|PPCDC|ATP5MK|NADK2|UPRT|HACD2|AK9	-4.1
GO Biological Processes	GO:0008380	RNA splicing	-6.1	DDX5|DHX15|FUS|HNRNPA1|HNRNPA2B1|HNRNPH1|HNRNPK|HNRNPU|PNN|SFPQ|SRSF1|SRSF5|SRSF6|SMN1|SNRNP70|SNRPA1|SNRPD2|SNRPF|SNRPG|SRPK2|DDX39B|TAF15|SF3A2|ZRSR2|TTF2|PRPF18|SRSF9|ZPR1|PRPF4B|PRPF3|SRSF11|ZRANB2|WTAP|RBM19|PQBP1|SUGP2|RBM6|RBM5|DDX17|TXNL4A|CLASRP|LSM6|ACIN1|RRP1B|TARDBP|MTREX|VIRMA|LSM3|RBMX|TRA2A|RSRC1|LSM7|LUC7L3|MAGOHB|LUC7L|THOC2|ESRP2|YTHDC1|PAXBP1|SREK1|HNRNPA3|RBM20|ZNF326	-3.7
GO Biological Processes	GO:0019693	ribose phosphate metabolic process	-6.1	NUDT2|ATP5F1A|ATP5F1E|ATP5MC1|ATP5MC3|ATP5ME|ATP5PO|DGUOK|DLAT|ACSL4|GART|HINT1|HMGCR|HPRT1|ITPA|NDUFA1|NDUFA2|NDUFA3|NDUFA7|NDUFA8|NDUFA9|NDUFB4|NDUFB5|NDUFB6|NDUFB8|NDUFC2|NDUFS4|NDUFS5|NME1|NPR1|PDE7A|PFKFB2|PGK1|PRPS1|PRPS2|RAN|SDHB|SDHD|TPST1|SUCLG1|SUCLA2|ATP5MF|SLC25A13|NME6|ATP5PD|ATP5MG|NUDT5|RPIA|DMAC2L|NME7|STOML2|SLC35B3|NDUFA13|RAB23|NDUFB11|CROT|MFN1|NDUFA12|PPCDC|MCEE|ATP5MK|ACOT4|…	-3.6
GO Biological Processes	GO:0006364	rRNA processing	-5.8	EIF6|PIN4|PWP2|RPL7|RPL11|RPL27|RPL35A|RPS8|RPS17|RPS19|RPS21|RPS24|RPS27|RPS28|RRP9|NOLC1|MPHOSPH6|DDX17|RPP30|RPP40|LSM6|RRP1B|RRP8|MTREX|UTP20|UTP18|TFB1M|UTP11|POP5|ZNHIT6|NOL8|HEATR1|NHP2|RIOK2|UTP3|TFB2M|ERI3|LAS1L|NIFK|SLX9|TSR2|HELB|EXOSC6|MTERF4|RPL7L1	-3.4
GO Biological Processes	GO:0034660	ncRNA metabolic process	-5.8	CDK7|DDX3X|GRSF1|HARS1|HNRNPA2B1|IARS1|EIF6|MARS1|PIN4|PWP2|RARS1|RPL7|RPL11|RPL27|RPL35A|RPS8|RPS17|RPS19|RPS21|RPS24|RPS27|RPS28|SNAPC3|TARS1|YARS1|RRP9|NOLC1|LCMT2|FARSB|MPHOSPH6|DDX17|RPP30|RPP40|DUS4L|LSM6|RRP1B|RRP8|HARS2|MTREX|ADAT1|MOCS3|UTP20|UTP18|TFB1M|UTP11|POP5|CDK5RAP1|ZNHIT6|NOL8|HEATR1|INTS10|ELP2|NHP2|INTS8|RIOK2|DTWD1|RARS2|UTP3|OSGEPL1|TFB2M|POLR1E|ERI3|TUT7|RPAP2|URM1|TRMT1L|L…	-3.4
GO Biological Processes	GO:0009150	purine ribonucleotide metabolic process	-5.8	NUDT2|ATP5F1A|ATP5F1E|ATP5MC1|ATP5MC3|ATP5ME|ATP5PO|DGUOK|DLAT|ACSL4|GART|HINT1|HMGCR|HPRT1|ITPA|NDUFA1|NDUFA2|NDUFA3|NDUFA7|NDUFA8|NDUFA9|NDUFB4|NDUFB5|NDUFB6|NDUFB8|NDUFC2|NDUFS4|NDUFS5|NME1|NPR1|PDE7A|PFKFB2|PGK1|PRPS2|RAN|SDHB|SDHD|TPST1|SUCLG1|SUCLA2|ATP5MF|SLC25A13|NME6|ATP5PD|ATP5MG|DMAC2L|NME7|STOML2|SLC35B3|NDUFA13|RAB23|NDUFB11|CROT|MFN1|NDUFA12|PPCDC|MCEE|ATP5MK|ACOT4|HACD2|AK9|NUDT4B	-3.3
GO Biological Processes	GO:0034470	ncRNA processing	-5.7	DDX3X|GRSF1|HNRNPA2B1|EIF6|PIN4|PWP2|RPL7|RPL11|RPL27|RPL35A|RPS8|RPS17|RPS19|RPS21|RPS24|RPS27|RPS28|RRP9|NOLC1|LCMT2|MPHOSPH6|DDX17|RPP30|RPP40|DUS4L|LSM6|RRP1B|RRP8|MTREX|ADAT1|MOCS3|UTP20|UTP18|TFB1M|UTP11|POP5|CDK5RAP1|ZNHIT6|NOL8|HEATR1|INTS10|ELP2|NHP2|INTS8|RIOK2|DTWD1|UTP3|OSGEPL1|TFB2M|ERI3|TUT7|URM1|TRMT1L|LAS1L|C9orf64|NIFK|SLX9|TSR2|HELB|TRMT61A|EXOSC6|TYW3|TYW5|MTERF4|METTL6|INTS6L|…	-3.3
GO Biological Processes	GO:0022618	ribonucleoprotein complex assembly	-5.7	EIF6|PWP2|RPL10|RPL11|RPL23A|RPL24|RPL38|RPS19|RPS27|RPS28|SRSF1|SRSF5|SRSF6|SMN1|SNRPD2|SNRPF|SNRPG|SRPK2|TAF9|EIF4H|DDX39B|SF3A2|ZRSR2|PRPF18|DENR|EIF3J|SRSF9|EIF2S2|PRPF3|RBM5|PTGES3|TXNL4A|NUDT21|CPSF6|LUC7L3|NLE1|ZNHIT6|SHQ1|LUC7L|YTHDC1	-3.3
GO Biological Processes	GO:0006163	purine nucleotide metabolic process	-5.6	NUDT2|ATP5F1A|ATP5F1E|ATP5MC1|ATP5MC3|ATP5ME|ATP5PO|DGUOK|DLAT|ACSL4|GART|HINT1|HMGCR|HPRT1|ITPA|NDUFA1|NDUFA2|NDUFA3|NDUFA7|NDUFA8|NDUFA9|NDUFB4|NDUFB5|NDUFB6|NDUFB8|NDUFC2|NDUFS4|NDUFS5|NME1|NPR1|PDE7A|PFKFB2|PGK1|PRPS1|PRPS2|RAN|SDHB|SDHD|TPST1|SUCLG1|SUCLA2|ATP5MF|SLC25A13|NME6|ATP5PD|ATP5MG|DMAC2L|NME7|STOML2|SLC35B3|NDUFA13|RAB23|NDUFB11|CROT|MFN1|NDUFA12|PPCDC|MCEE|ATP5MK|ACOT4|HACD2|AK9|N…	-3.2
GO Biological Processes	GO:0000377	RNA splicing, via transesterification reactions with bulged adenosine as nucleophile	-5.5	DDX5|HNRNPA1|HNRNPA2B1|HNRNPH1|HNRNPK|HNRNPU|PNN|SFPQ|SRSF1|SRSF5|SRSF6|SMN1|SNRNP70|SNRPA1|SNRPD2|SNRPF|SNRPG|SRPK2|DDX39B|SF3A2|ZRSR2|PRPF18|SRSF9|PRPF4B|PRPF3|RBM19|PQBP1|RBM6|RBM5|DDX17|TXNL4A|LSM6|MTREX|LSM3|RBMX|TRA2A|RSRC1|LSM7|LUC7L3|MAGOHB|LUC7L|ESRP2|YTHDC1|PAXBP1|HNRNPA3	-3.1
GO Biological Processes	GO:0000398	mRNA splicing, via spliceosome	-5.5	DDX5|HNRNPA1|HNRNPA2B1|HNRNPH1|HNRNPK|HNRNPU|PNN|SFPQ|SRSF1|SRSF5|SRSF6|SMN1|SNRNP70|SNRPA1|SNRPD2|SNRPF|SNRPG|SRPK2|DDX39B|SF3A2|ZRSR2|PRPF18|SRSF9|PRPF4B|PRPF3|RBM19|PQBP1|RBM6|RBM5|DDX17|TXNL4A|LSM6|MTREX|LSM3|RBMX|TRA2A|RSRC1|LSM7|LUC7L3|MAGOHB|LUC7L|ESRP2|YTHDC1|PAXBP1|HNRNPA3	-3.1
GO Biological Processes	GO:0000375	RNA splicing, via transesterification reactions	-5.3	DDX5|HNRNPA1|HNRNPA2B1|HNRNPH1|HNRNPK|HNRNPU|PNN|SFPQ|SRSF1|SRSF5|SRSF6|SMN1|SNRNP70|SNRPA1|SNRPD2|SNRPF|SNRPG|SRPK2|DDX39B|SF3A2|ZRSR2|PRPF18|SRSF9|PRPF4B|PRPF3|RBM19|PQBP1|RBM6|RBM5|DDX17|TXNL4A|LSM6|MTREX|LSM3|RBMX|TRA2A|RSRC1|LSM7|LUC7L3|MAGOHB|LUC7L|ESRP2|YTHDC1|PAXBP1|HNRNPA3	-2.9
GO Biological Processes	GO:0009259	ribonucleotide metabolic process	-5.2	NUDT2|ATP5F1A|ATP5F1E|ATP5MC1|ATP5MC3|ATP5ME|ATP5PO|DGUOK|DLAT|ACSL4|GART|HINT1|HMGCR|HPRT1|ITPA|NDUFA1|NDUFA2|NDUFA3|NDUFA7|NDUFA8|NDUFA9|NDUFB4|NDUFB5|NDUFB6|NDUFB8|NDUFC2|NDUFS4|NDUFS5|NME1|NPR1|PDE7A|PFKFB2|PGK1|PRPS2|RAN|SDHB|SDHD|TPST1|SUCLG1|SUCLA2|ATP5MF|SLC25A13|NME6|ATP5PD|ATP5MG|DMAC2L|NME7|STOML2|SLC35B3|NDUFA13|RAB23|NDUFB11|CROT|MFN1|NDUFA12|PPCDC|MCEE|ATP5MK|ACOT4|UPRT|HACD2|AK9|NU…	-2.9
GO Biological Processes	GO:0071826	ribonucleoprotein complex subunit organization	-5.2	EIF6|PWP2|RPL10|RPL11|RPL23A|RPL24|RPL38|RPS19|RPS27|RPS28|SRSF1|SRSF5|SRSF6|SMN1|SNRPD2|SNRPF|SNRPG|SRPK2|TAF9|EIF4H|DDX39B|SF3A2|ZRSR2|PRPF18|DENR|EIF3J|SRSF9|EIF2S2|PRPF3|RBM5|PTGES3|TXNL4A|NUDT21|CPSF6|LUC7L3|NLE1|ZNHIT6|SHQ1|LUC7L|YTHDC1	-2.9
GO Biological Processes	GO:0016072	rRNA metabolic process	-5.2	EIF6|MARS1|PIN4|PWP2|RPL7|RPL11|RPL27|RPL35A|RPS8|RPS17|RPS19|RPS21|RPS24|RPS27|RPS28|RRP9|NOLC1|MPHOSPH6|DDX17|RPP30|RPP40|LSM6|RRP1B|RRP8|MTREX|UTP20|UTP18|TFB1M|UTP11|POP5|ZNHIT6|NOL8|HEATR1|NHP2|RIOK2|UTP3|TFB2M|POLR1E|ERI3|LAS1L|NIFK|SLX9|TSR2|HELB|EXOSC6|MTERF4|RPL7L1	-2.9
GO Biological Processes	GO:0016071	mRNA metabolic process	-4.9	ATM|CSTF2|DDX5|DHX15|ETF1|GRSF1|HNRNPA1|HNRNPA2B1|HNRNPH1|HNRNPK|HNRNPU|MLH1|PNN|PRKACA|SFPQ|SRSF1|SRSF5|SRSF6|HLTF|SMN1|SNRNP70|SNRPA1|SNRPD2|SNRPF|SNRPG|SRPK2|TAF9|TAF11|DDX39B|PABPN1|SF3A2|ZRSR2|TTF2|PRPF18|SRSF9|ZPR1|PRPF4B|PRPF3|SRSF11|ZRANB2|WTAP|RBM19|PQBP1|SUGP2|RBM6|RBM5|DDX17|TXNL4A|HNRNPA0|NUDT21|CPSF6|CLASRP|LSM6|ACIN1|RRP1B|CSTF2T|TARDBP|MTREX|VIRMA|LSM3|RBMX|TRA2A|POLR1H|RSRC1|LSM7|…	-2.5
GO Biological Processes	GO:0006753	nucleoside phosphate metabolic process	-4.8	NUDT2|ATP5F1A|ATP5F1E|ATP5MC1|ATP5MC3|ATP5ME|ATP5PO|DGUOK|DLAT|ACSL4|GART|HINT1|HMGCR|HPRT1|ITPA|NDUFA1|NDUFA2|NDUFA3|NDUFA7|NDUFA8|NDUFA9|NDUFB4|NDUFB5|NDUFB6|NDUFB8|NDUFC2|NDUFS4|NDUFS5|NME1|NPR1|PDE7A|PFKFB2|PGK1|PRPS1|PRPS2|RAN|RRM2|SDHB|SDHD|TPST1|SUCLG1|SUCLA2|ATP5MF|NAMPT|SLC25A13|NME6|ATP5PD|ATP5MG|NUDT5|DMAC2L|NME7|STOML2|RRM2B|SLC35B3|NDUFA13|NT5C3A|RAB23|NDUFB11|CROT|NMRK1|MFN1|NDUFA12…	-2.5
GO Biological Processes	GO:0009117	nucleotide metabolic process	-4.8	NUDT2|ATP5F1A|ATP5F1E|ATP5MC1|ATP5MC3|ATP5ME|ATP5PO|DGUOK|DLAT|ACSL4|GART|HINT1|HMGCR|HPRT1|ITPA|NDUFA1|NDUFA2|NDUFA3|NDUFA7|NDUFA8|NDUFA9|NDUFB4|NDUFB5|NDUFB6|NDUFB8|NDUFC2|NDUFS4|NDUFS5|NME1|NPR1|PDE7A|PFKFB2|PGK1|PRPS1|PRPS2|RAN|RRM2|SDHB|SDHD|TPST1|SUCLG1|SUCLA2|ATP5MF|NAMPT|SLC25A13|NME6|ATP5PD|ATP5MG|NUDT5|DMAC2L|NME7|STOML2|RRM2B|SLC35B3|NDUFA13|NT5C3A|RAB23|NDUFB11|CROT|NMRK1|MFN1|NDUFA12…	-2.5
GO Biological Processes	GO:0017004	cytochrome complex assembly	-4.8	COX15|COX3|COX17|COX16|SLC25A33|UQCC2|COX14|LYRM7|COA6|SMIM20|COA5|C12orf73|PET100	-2.5
GO Biological Processes	GO:0072521	purine-containing compound metabolic process	-4.8	NUDT2|ATP5F1A|ATP5F1E|ATP5MC1|ATP5MC3|ATP5ME|ATP5PO|DGUOK|DLAT|ACSL4|GART|HINT1|HMGCR|HPRT1|ITPA|NDUFA1|NDUFA2|NDUFA3|NDUFA7|NDUFA8|NDUFA9|NDUFB4|NDUFB5|NDUFB6|NDUFB8|NDUFC2|NDUFS4|NDUFS5|NME1|NPR1|PDE7A|PFKFB2|PGK1|PRPS1|PRPS2|RAN|SDHB|SDHD|TPST1|SUCLG1|SUCLA2|ATP5MF|SLC25A13|NME6|ATP5PD|ATP5MG|DMAC2L|NME7|STOML2|SLC35B3|NDUFA13|RAB23|NDUFB11|CROT|MFN1|NDUFA12|PPCDC|MCEE|ATP5MK|ACOT4|HACD2|AK9|N…	-2.5
GO Biological Processes	GO:1902600	proton transmembrane transport	-4.5	SLC25A4|ATP5F1A|ATP5MC1|ATP5MC3|ATP6V1C1|ATP6V0B|ATP5PO|CLCN3|COX6B1|COX7A1|COX7B|COX15|COX3|CYTB|SLC25A3|SLC9A5|UQCRH|COX7A2L|COX5A|ATP5MF|ATP6AP2|TCIRG1|DMAC2L|UQCR10|ATP6V1D|ATP6V1H|SLC4A10	-2.2
GO Biological Processes	GO:0006123	mitochondrial electron transport, cytochrome c to oxygen	-4.5	COX6B1|COX6C|COX7A1|COX7A2P2|COX7B|COX15|COX3|COX7A2L|COX5A|CYCS	-2.2
GO Biological Processes	GO:0140053	mitochondrial gene expression	-4.4	HARS1|NDUFA7|MRPL23|MRPL33|MRPL19|MRPL3|MRPL42|MRPL13|MRPL18|MRPS18C|MRPL2|TFB1M|MRPL51|MRPL48|MRPS23|CDK5RAP1|RARS2|MRPS14|TFB2M|MRPL14|MRPL36|MRPL11|MRPL9|TEFM|MTERF2|SLC25A33|MRPL43|MRPL52|MTERF4|GATC	-2.1
GO Biological Processes	GO:0043484	regulation of RNA splicing	-4.2	CIRBP|DDX5|FUS|GRSF1|HNRNPA1|HNRNPA2B1|HNRNPH1|HNRNPK|HNRNPU|RPS13|SRSF1|SRSF5|SRSF6|SNRNP70|SRPK2|TAF9|SRSF9|KAT2B|ZPR1|WTAP|PQBP1|RBM12|RBM5|DDX17|RRP1B|RBMX|TRA2A|CLK4|ESRP2|CCNL2|YTHDC1|HNRNPLL|RBM20|SLC39A5|ZNF326	-1.9
GO Biological Processes	GO:0055086	nucleobase-containing small molecule metabolic process	-4	NUDT2|ATP5F1A|ATP5F1E|ATP5MC1|ATP5MC3|ATP5ME|ATP5PO|DGUOK|DLAT|ACSL4|GART|HINT1|HMGCR|HPRT1|ITPA|NDUFA1|NDUFA2|NDUFA3|NDUFA7|NDUFA8|NDUFA9|NDUFB4|NDUFB5|NDUFB6|NDUFB8|NDUFC2|NDUFS4|NDUFS5|NME1|NPR1|PDE7A|PFKFB2|PGK1|PRPS1|PRPS2|RAN|RRM2|SDHB|SDHD|UGP2|TPST1|SUCLG1|SUCLA2|ATP5MF|NAMPT|SLC25A13|NME6|ATP5PD|ATP5MG|NUDT5|TGDS|DMAC2L|NME7|STOML2|RRM2B|SLC35B3|NDUFA13|NT5C3A|RAB23|NDUFB11|CROT|NMRK1|MF…	-1.7
GO Biological Processes	GO:0000245	spliceosomal complex assembly	-3.9	SRSF1|SRSF5|SRSF6|SMN1|SNRPD2|SNRPG|SRPK2|DDX39B|SF3A2|ZRSR2|SRSF9|RBM5|TXNL4A|LUC7L3|LUC7L|YTHDC1	-1.6
GO Biological Processes	GO:0000380	alternative mRNA splicing, via spliceosome	-3.9	DDX5|SFPQ|SRSF1|SRSF6|SRSF9|PQBP1|DDX17|RSRC1|ESRP2	-1.6
GO Biological Processes	GO:0006120	mitochondrial electron transport, NADH to ubiquinone	-3.7	NDUFA1|NDUFA2|NDUFA3|NDUFA7|NDUFA8|NDUFA9|NDUFB4|NDUFB5|NDUFB6|NDUFB8|NDUFC2|NDUFS4|NDUFS5	-1.5
GO Biological Processes	GO:0042273	ribosomal large subunit biogenesis	-3.5	EIF6|RPL7|RPL10|RPL11|RPL23A|RPL24|RPL35A|RPL38|NLE1|ZNHIT6|HEATR3|SDAD1|NHP2|LAS1L|NIFK|MALSU1|RPL7L1	-1.3
GO Biological Processes	GO:0032543	mitochondrial translation	-3.5	HARS1|NDUFA7|MRPL23|MRPL33|MRPL19|MRPL3|MRPL42|MRPL13|MRPL18|MRPS18C|MRPL2|MRPL51|MRPL48|MRPS23|RARS2|MRPS14|MRPL14|MRPL36|MRPL11|MRPL9|MRPL43|MRPL52|GATC	-1.3
GO Biological Processes	GO:0008535	respiratory chain complex IV assembly	-3.5	COX15|COX3|COX17|COX16|COX14|COA6|SMIM20|COA5|PET100	-1.3
GO Biological Processes	GO:0042274	ribosomal small subunit biogenesis	-3.4	PWP2|RPL38|RPS8|RPS17|RPS19|RPS21|RPS24|RPS27|RPS28|RPP40|LSM6|UTP20|HEATR1|RIOK2|UTP3|SLX9|TSR2|HELB	-1.2
GO Biological Processes	GO:0030490	maturation of SSU-rRNA	-3.3	PWP2|RPS8|RPS19|RPS21|RPS28|RPP40|LSM6|UTP20|HEATR1|RIOK2|UTP3|SLX9|TSR2|HELB	-1.1
GO Biological Processes	GO:0110104	mRNA alternative polyadenylation	-3.2	NUDT21|CPSF6|VIRMA|YTHDC1	-0.99
GO Biological Processes	GO:1902527	positive regulation of protein monoubiquitination	-3.2	BIRC2|UBB|PDCD6|FANCM	-0.99
GO Biological Processes	GO:0000462	maturation of SSU-rRNA from tricistronic rRNA transcript (SSU-rRNA, 5.8S rRNA, LSU-rRNA)	-2.9	PWP2|RPS8|RPS19|RPS21|RPP40|UTP20|HEATR1|UTP3|SLX9|TSR2|HELB	-0.72
GO Biological Processes	GO:0071500	cellular response to nitrosative stress	-2.9	ATM|ATG5|STOX1	-0.72
GO Biological Processes	GO:0042255	ribosome assembly	-2.8	DDX3X|EIF6|PWP2|RPL10|RPL11|RPL23A|RPL24|RPL38|RPS19|RPS27|RPS28|MTERF3|NLE1|MTERF4	-0.69
GO Biological Processes	GO:0051851	modulation by host of symbiont process	-2.8	CCNT1|CDK9|HDAC1|IFI27|PPIB|PSMC3|TAF11|CCNK|SAP30|VAPA|RRP1B|TARDBP|FBXL2|ZNF502	-0.69
GO Biological Processes	GO:0006390	mitochondrial transcription	-2.8	TFB1M|TFB2M|TEFM|MTERF2|SLC25A33|MTERF4	-0.66
GO Biological Processes	GO:0006399	tRNA metabolic process	-2.7	GRSF1|HARS1|IARS1|MARS1|RARS1|TARS1|YARS1|LCMT2|FARSB|RPP30|RPP40|DUS4L|LSM6|HARS2|ADAT1|MOCS3|POP5|CDK5RAP1|ELP2|DTWD1|RARS2|OSGEPL1|URM1|TRMT1L|C9orf64|MARS2|TRMT61A|TYW3|TYW5|METTL6|GATC	-0.62
GO Biological Processes	GO:0070453	regulation of heme biosynthetic process	-2.7	ABCB7|ABCB10|TMEM14A|TMEM14C	-0.62
GO Biological Processes	GO:1901463	regulation of tetrapyrrole biosynthetic process	-2.7	ABCB7|ABCB10|TMEM14A|TMEM14C	-0.62
GO Biological Processes	GO:1902525	regulation of protein monoubiquitination	-2.7	BIRC2|UBB|PDCD6|FANCM	-0.62
GO Biological Processes	GO:0045141	meiotic telomere clustering	-2.7	ATM|MLH1|UBE2B|SUN1	-0.62
GO Biological Processes	GO:0055076	transition metal ion homeostasis	-2.7	ABCB7|ACO1|ATOX1|CYB561|MT3|S100A8|SRI|TF|TFR2|TFRC|SLC30A4|SLC39A14|FBXL5|SLC40A1|SLC25A37|SLC30A10|BDH2|SLC39A10|SLC30A5|NDFIP1|TMEM199|SLC39A5|BOLA3	-0.56
GO Biological Processes	GO:0001539	cilium or flagellum-dependent cell motility	-2.6	BBS2|SORD|UBE2B|VPS13A|DPCD|TTLL3|IFT81|CFAP46|DNAAF2|MNS1|CFAP44|DNAH7|SPEF2|SLIRP|EFHC1|CATSPER2|CFAP54|KLC3|CCDC39	-0.52
GO Biological Processes	GO:0060285	cilium-dependent cell motility	-2.6	BBS2|SORD|UBE2B|VPS13A|DPCD|TTLL3|IFT81|CFAP46|DNAAF2|MNS1|CFAP44|DNAH7|SPEF2|SLIRP|EFHC1|CATSPER2|CFAP54|KLC3|CCDC39	-0.52
GO Biological Processes	GO:0051290	protein heterotetramerization	-2.6	PKD2|RRM2|HSD17B8|FARSB|NUDT21|CPSF6	-0.51
GO Biological Processes	GO:1990542	mitochondrial transmembrane transport	-2.6	ABCB7|SLC25A4|HSPD1|SLC25A3|AIFM1|SLC25A13|TIMM17A|TOMM40|MRPL18|STOML2|SLC25A37|TOMM7|MAIP1|SLC25A33|SMDT1|SFXN1|SFXN2	-0.5
GO Biological Processes	GO:0051131	chaperone-mediated protein complex assembly	-2.5	HSPD1|MKKS|PSMG1|PFDN6|CCT2|PTGES3|PSMG3	-0.43
GO Biological Processes	GO:1903312	negative regulation of mRNA metabolic process	-2.5	CCNT1|CDK9|CIRBP|MAPK14|FUS|HNRNPA2B1|HNRNPK|HNRNPU|SRSF6|TRAF5|TAF15|AXIN2|SRSF9|HNRNPA0|TARDBP|RBMX|ANGEL2	-0.39
GO Biological Processes	GO:0000041	transition metal ion transport	-2.4	ABCB7|ATOX1|CLTC|MT3|TF|TFR2|TFRC|SLC30A4|COX17|PGRMC2|SLC39A14|SLC40A1|SLC25A37|SLC30A10|TMEM165|SLC39A10|SLC30A5|SFXN1|SLC39A5	-0.37
GO Biological Processes	GO:1901858	regulation of mitochondrial DNA metabolic process	-2.4	SSBP1|STOML2|FLCN|STOX1	-0.35
GO Biological Processes	GO:0051409	response to nitrosative stress	-2.4	ADH5|ATM|ATG5|STOX1	-0.35
GO Biological Processes	GO:1901401	regulation of tetrapyrrole metabolic process	-2.4	ABCB7|ABCB10|TMEM14A|TMEM14C	-0.35
GO Biological Processes	GO:0006995	cellular response to nitrogen starvation	-2.4	ATG5|GABARAPL2|GABARAPL1|MAP1LC3B	-0.35
GO Biological Processes	GO:0034397	telomere localization	-2.4	ATM|MLH1|UBE2B|SUN1	-0.35
GO Biological Processes	GO:0043562	cellular response to nitrogen levels	-2.4	ATG5|GABARAPL2|GABARAPL1|MAP1LC3B	-0.35
GO Biological Processes	GO:0090220	chromosome localization to nuclear envelope involved in homologous chromosome segregation	-2.4	ATM|MLH1|UBE2B|SUN1	-0.35
GO Biological Processes	GO:0050684	regulation of mRNA processing	-2.4	CCNT1|CDK11B|CDK9|CIRBP|DDX5|HNRNPA1|HNRNPA2B1|HNRNPK|HNRNPU|SRSF6|SNRNP70|SRPK2|SRSF9|WTAP|RBM5|DDX17|NUDT21|CPSF6|VIRMA|RBMX|TRA2A|YTHDC1|DHX36|SLC39A5	-0.34
GO Biological Processes	GO:0055069	zinc ion homeostasis	-2.4	MT3|S100A8|SLC30A4|SLC39A14|SLC30A10|SLC39A10|SLC30A5|SLC39A5	-0.33
GO Biological Processes	GO:0035751	regulation of lysosomal lumen pH	-2.4	ATP6V0B|ATP6AP2|TCIRG1|SNAPIN|ATP6V1D|ATP6V1H|TMEM165|TMEM199	-0.33
GO Biological Processes	GO:0006122	mitochondrial electron transport, ubiquinol to cytochrome c	-2.4	CYTB|UQCRH|UQCRQ|UQCR10|CYCS	-0.33
GO Biological Processes	GO:0043039	tRNA aminoacylation	-2.3	HARS1|IARS1|MARS1|RARS1|TARS1|YARS1|FARSB|HARS2|RARS2|MARS2|GATC	-0.28
GO Biological Processes	GO:0099111	microtubule-based transport	-2.3	ARL3|AP3S1|HNRNPU|PAFAH1B1|RAB1A|SFPQ|UBB|IFT88|AP3M2|AGTPBP1|SUN1|SNAPIN|DPCD|STK36|IFT81|ARMCX3|HSPB11|DYNC2I1|DNAAF2|ARL8B|KIF27|IFT80|ARHGAP21|WDR19|DYNC2H1|JHY|SPEF2|MGARP|BORCS7|CFAP54|KLC3|BLOC1S2|CCDC39	-0.28
GO Biological Processes	GO:0003341	cilium movement	-2.3	BBS2|SORD|UBE2B|VPS13A|DPCD|CFAP61|TTLL3|STK36|IFT81|CFAP46|DNAAF2|MNS1|KIF27|CFAP44|DNAH7|JHY|SPEF2|SLIRP|CATSPER2|CFAP54|KLC3|CCDC39	-0.26
GO Biological Processes	GO:1900363	regulation of mRNA polyadenylation	-2.3	CCNT1|CDK9|NUDT21|CPSF6|VIRMA|YTHDC1	-0.25
GO Biological Processes	GO:0051702	biological process involved in interaction with symbiont	-2.2	CCNT1|CDK9|HDAC1|HSPD1|IFI27|PPIB|PSMC3|TAF11|CCNK|SAP30|VAPA|RRP1B|TARDBP|FBXL2|CFHR5|ZNF502	-0.25
GO Biological Processes	GO:0046916	cellular transition metal ion homeostasis	-2.2	ABCB7|ACO1|ATOX1|CYB561|MT3|S100A8|SRI|TF|TFR2|TFRC|SLC39A14|SLC40A1|SLC30A10|SLC39A10|SLC30A5|NDFIP1|TMEM199|SLC39A5	-0.24
GO Biological Processes	GO:0007042	lysosomal lumen acidification	-2.2	ATP6V0B|ATP6AP2|TCIRG1|SNAPIN|ATP6V1D|ATP6V1H|TMEM199	-0.24
GO Biological Processes	GO:1904666	regulation of ubiquitin protein ligase activity	-2.2	RPL11|RPL37|RPS20|SKP1|CDC14B|RPL23|DNM1L	-0.24
GO Biological Processes	GO:0043038	amino acid activation	-2.2	HARS1|IARS1|MARS1|RARS1|TARS1|YARS1|FARSB|HARS2|RARS2|MARS2|GATC	-0.23
GO Biological Processes	GO:0050821	protein stabilization	-2.1	CCT6A|CDK7|HSPD1|LAMP2|MDM4|MT3|PFDN1|PIN1|PPIB|PEX19|RPL11|SPAG1|TAF9|UBE2B|SUMO1|VBP1|ZNF207|RPL23|TSPAN1|PFDN6|CCT2|PTGES3|HYPK|AHSP|DNAAF2|MFSD1|MARCHF7|MTMR9|MCM8|TBRG1|DNAAF10|ZSWIM7	-0.17
GO Biological Processes	GO:0033210	leptin-mediated signaling pathway	-2.1	BBS2|LEPR|MT3|MKKS	-0.17
GO Biological Processes	GO:0090069	regulation of ribosome biogenesis	-2.1	KAT2B|SHQ1|METTL18|MALSU1	-0.17
GO Biological Processes	GO:0033275	actin-myosin filament sliding	-2.1	MYL6|TNNT2|MYL11|MYL6B	-0.17
GO Biological Processes	GO:0036503	ERAD pathway	-2.1	PSMC6|XBP1|MARCHF6|SEC61B|FAF1|ERLIN2|DERL2|FAM8A1|JKAMP|DNAJC10|UGGT2|NGLY1|TMUB2|DERL1|DNAJB14|TMEM67|UBE2J2|RNF175	-0.17
GO Biological Processes	GO:0006882	cellular zinc ion homeostasis	-2.1	MT3|S100A8|SLC39A14|SLC30A10|SLC39A10|SLC30A5|SLC39A5	-0.15
GO Biological Processes	GO:0007063	regulation of sister chromatid cohesion	-2.1	RAD21|RB1|SFPQ|AXIN2|SLF2|HDAC8	-0.15
GO Biological Processes	GO:0033617	mitochondrial cytochrome c oxidase assembly	-2.1	COX17|COX16|COX14|SMIM20|COA5|PET100	-0.15
GO Biological Processes	GO:0071731	response to nitric oxide	-2.1	AQP1|ATP5F1A|CRK|MT3|TXN|AIFM1	-0.15
GO Biological Processes	GO:0060294	cilium movement involved in cell motility	-2.1	BBS2|SORD|UBE2B|VPS13A|DPCD|TTLL3|IFT81|CFAP46|MNS1|CFAP44|SPEF2|SLIRP|CATSPER2|CFAP54|KLC3|CCDC39	-0.13
GO Biological Processes	GO:0006418	tRNA aminoacylation for protein translation	-2.1	HARS1|IARS1|MARS1|RARS1|TARS1|YARS1|FARSB|HARS2|RARS2|MARS2	-0.12
GO Biological Processes	GO:0051028	mRNA transport	-2.1	CETN3|HNRNPA1|HNRNPA2B1|SRSF1|XPO1|DDX39B|PABPN1|NUP155|NUP93|NXF1|NUP160|MAGOHB|NUP133|EIF5A2|PARP11|THOC2|UPF3A|YTHDC1|NUP35|HNRNPA3	-0.11
GO Cellular Components	GO:0031966	mitochondrial membrane	-18	ABCB7|ACADL|SLC25A4|ATP5F1A|ATP5F1E|ATP5MC1|ATP5MC3|ATP5ME|ATP5PO|BCL2L2|COX6B1|COX6C|COX7A1|COX7A2P2|COX7B|COX15|ACSL4|GK|HADHB|HSPD1|IFI27|LDHB|MT3|COX3|CYTB|NDUFA1|NDUFA2|NDUFA3|NDUFA7|NDUFA8|NDUFA9|NDUFB4|NDUFB5|NDUFB6|NDUFB8|NDUFC2|NDUFS4|NDUFS5|SLC25A3|MRPL23|RPS3|RPS27A|SDHB|SDHD|SORD|UBB|UBC|UQCRH|VDAC1|VDAC2|OGT|AIFM1|COX7A2L|COX5A|ATP5MF|MRPL33|MRPL19|DNM1L|SLC25A13|TIMM17A|TOMM40|ATP5P…	-14
GO Cellular Components	GO:0005743	mitochondrial inner membrane	-17	ABCB7|SLC25A4|ATP5F1A|ATP5F1E|ATP5MC1|ATP5MC3|ATP5ME|ATP5PO|COX6B1|COX6C|COX7A1|COX7A2P2|COX7B|COX15|HADHB|HSPD1|LDHB|COX3|CYTB|NDUFA1|NDUFA2|NDUFA3|NDUFA7|NDUFA8|NDUFA9|NDUFB4|NDUFB5|NDUFB6|NDUFB8|NDUFC2|NDUFS4|NDUFS5|SLC25A3|MRPL23|RPS3|SDHB|SDHD|UQCRH|AIFM1|COX7A2L|COX5A|ATP5MF|MRPL33|MRPL19|SLC25A13|TIMM17A|TOMM40|ATP5PD|ATP5MG|MTX2|YME1L1|MRPL3|ABCB10|UQCRQ|DMAC2L|MRPL42|MRPL13|MRPL18|NDUFAF…	-13
GO Cellular Components	GO:0019866	organelle inner membrane	-17	ABCB7|SLC25A4|ATP5F1A|ATP5F1E|ATP5MC1|ATP5MC3|ATP5ME|ATP5PO|COX6B1|COX6C|COX7A1|COX7A2P2|COX7B|COX15|HADHB|HSPD1|IFI27|LDHB|COX3|CYTB|NDUFA1|NDUFA2|NDUFA3|NDUFA7|NDUFA8|NDUFA9|NDUFB4|NDUFB5|NDUFB6|NDUFB8|NDUFC2|NDUFS4|NDUFS5|P2RX5|SLC25A3|MRPL23|RPS3|SDHB|SDHD|UQCRH|AIFM1|COX7A2L|COX5A|ATP5MF|MRPL33|MATR3|MRPL19|SLC25A13|TIMM17A|TOMM40|ATP5PD|ATP5MG|MTX2|YME1L1|MRPL3|CBX3|SUN1|ABCB10|UNC50|UQCRQ|…	-13
GO Cellular Components	GO:0005740	mitochondrial envelope	-16	ABCB7|ACADL|SLC25A4|ATP5F1A|ATP5F1E|ATP5MC1|ATP5MC3|ATP5ME|ATP5PO|BCL2L2|COX6B1|COX6C|COX7A1|COX7A2P2|COX7B|COX15|ACSL4|GK|HADHB|HSPD1|IFI27|LDHB|MT3|COX3|CYTB|NDUFA1|NDUFA2|NDUFA3|NDUFA7|NDUFA8|NDUFA9|NDUFB4|NDUFB5|NDUFB6|NDUFB8|NDUFC2|NDUFS4|NDUFS5|SLC25A3|MRPL23|RPS3|RPS27A|SDHB|SDHD|SORD|UBB|UBC|UQCRH|VDAC1|VDAC2|HSD17B8|OGT|AIFM1|COX7A2L|COX5A|ATP5MF|MRPL33|MRPL19|DNM1L|COX17|SLC25A13|TIMM17…	-13
GO Cellular Components	GO:0005840	ribosome	-15	APEX1|BTF3|MT3|NDUFA7|RPL7|RPL9|RPL10|RPL11|RPL17|RPL18|RPL23A|MRPL23|RPL24|RPL27|RPL30|RPL27A|RPL29|RPL31|RPL32|RPL34|RPL35A|RPL37|RPL37A|RPL38|RPL39|RPS3|RPS8|RPS12|RPS13|RPS17|RPS19|RPS20|RPS21|RPS23|RPS24|RPS27|RPS27A|RPS28|RPS29|RPL23|MRPL33|MRPL19|MRPL3|SERP1|MRPL42|MRPL13|MRPL18|MRPS18C|MRPL2|MRPL51|MRPL48|MRPS23|MRPS14|MRPL14|MRPL36|MRPL11|MRPL9|MRPL43|MRPL52|MTERF4|RPL22L1|RPL7L1	-12
GO Cellular Components	GO:0098798	mitochondrial protein-containing complex	-15	SLC25A4|ATP5F1A|ATP5F1E|ATP5MC1|ATP5MC3|ATP5ME|ATP5PO|COX6B1|COX6C|COX7A1|COX7A2P2|COX7B|DLAT|HADHB|COX3|CYTB|NDUFA1|NDUFA2|NDUFA3|NDUFA7|NDUFA8|NDUFA9|NDUFB4|NDUFB5|NDUFB6|NDUFB8|NDUFC2|NDUFS4|NDUFS5|MRPL23|SDHB|SDHD|UQCRH|VDAC1|SUCLG1|COX7A2L|COX5A|ATP5MF|MRPL33|MRPL19|TIMM17A|TOMM40|ATP5PD|ATP5MG|MTX2|MRPL3|UQCRQ|MRPL42|MRPL13|MRPL18|UQCR10|MRPS18C|MRPL2|NDUFA13|MRPL51|MRPL48|MRPS23|NDUFB11|TO…	-12
GO Cellular Components	GO:0044391	ribosomal subunit	-15	RPL7|RPL9|RPL10|RPL11|RPL17|RPL18|RPL23A|MRPL23|RPL24|RPL27|RPL30|RPL27A|RPL29|RPL31|RPL32|RPL34|RPL35A|RPL37|RPL37A|RPL38|RPL39|RPS3|RPS8|RPS12|RPS13|RPS17|RPS19|RPS20|RPS21|RPS23|RPS24|RPS27|RPS27A|RPS28|RPS29|RPL23|MRPL33|MRPL19|MRPL3|MRPL42|MRPL13|MRPL18|MRPS18C|MRPL2|MRPL51|MRPL48|MRPS23|MRPS14|MRPL14|MRPL36|MRPL11|MRPL9|MRPL43|MRPL52|MTERF4|RPL7L1	-11
GO Cellular Components	GO:1990904	ribonucleoprotein complex	-14	BTF3|CIRBP|DDX5|DHX15|GRSF1|HNRNPA1|HNRNPA2B1|HNRNPH1|HNRNPK|HNRNPU|EIF6|PNN|PWP2|RPL7|RPL9|RPL10|RPL11|RPL17|RPL18|RPL23A|MRPL23|RPL24|RPL27|RPL30|RPL27A|RPL29|RPL31|RPL32|RPL34|RPL35A|RPL37|RPL37A|RPL38|RPL39|RPS3|RPS8|RPS12|RPS13|RPS17|RPS19|RPS20|RPS21|RPS23|RPS24|RPS27|RPS27A|RPS28|RPS29|SRSF1|SNRNP70|SNRPA1|SNRPD2|SNRPF|SNRPG|TAF9|VBP1|XPO1|DDX39B|PABPN1|SF3A2|ZRSR2|TTF2|PRPF18|EIF3J|PRPF4B…	-11
GO Cellular Components	GO:0015934	large ribosomal subunit	-13	RPL7|RPL9|RPL10|RPL11|RPL17|RPL18|RPL23A|MRPL23|RPL24|RPL27|RPL30|RPL27A|RPL29|RPL31|RPL32|RPL34|RPL35A|RPL37|RPL37A|RPL38|RPL39|RPL23|MRPL33|MRPL19|MRPL3|MRPL42|MRPL13|MRPL18|MRPL2|MRPL51|MRPL48|MRPL14|MRPL36|MRPL11|MRPL9|MRPL43|MRPL52|MTERF4|RPL7L1	-9.8
GO Cellular Components	GO:0098800	inner mitochondrial membrane protein complex	-12	ATP5F1A|ATP5F1E|ATP5MC1|ATP5MC3|ATP5ME|ATP5PO|COX6B1|COX6C|COX7A1|COX7A2P2|COX7B|COX3|CYTB|NDUFA1|NDUFA2|NDUFA3|NDUFA7|NDUFA8|NDUFA9|NDUFB4|NDUFB5|NDUFB6|NDUFB8|NDUFC2|NDUFS4|NDUFS5|SDHB|SDHD|UQCRH|COX7A2L|COX5A|ATP5MF|TIMM17A|ATP5PD|ATP5MG|MTX2|UQCRQ|UQCR10|NDUFA13|NDUFB11|NDUFA12|ATP5MK|SMDT1|MICOS13|IMMP1L|MTX3|MICOS10	-9.2
GO Cellular Components	GO:0022626	cytosolic ribosome	-12	RPL7|RPL9|RPL10|RPL11|RPL17|RPL18|RPL23A|RPL24|RPL27|RPL30|RPL27A|RPL29|RPL31|RPL32|RPL34|RPL35A|RPL37|RPL37A|RPL38|RPL39|RPS3|RPS8|RPS12|RPS13|RPS17|RPS19|RPS20|RPS21|RPS23|RPS24|RPS27|RPS27A|RPS28|RPS29|RPL23|RPL7L1	-9
GO Cellular Components	GO:0098803	respiratory chain complex	-10	COX6B1|COX6C|COX7A1|COX7A2P2|COX7B|COX3|CYTB|NDUFA1|NDUFA2|NDUFA3|NDUFA7|NDUFA8|NDUFA9|NDUFB4|NDUFB5|NDUFB6|NDUFB8|NDUFC2|NDUFS4|NDUFS5|SDHB|SDHD|UQCRH|COX7A2L|COX5A|UQCRQ|UQCR10|NDUFA13|NDUFB11|NDUFA12|COA6	-7.7
GO Cellular Components	GO:0070469	respirasome	-10	COX6B1|COX6C|COX7A1|COX7A2P2|COX7B|COX15|COX3|CYTB|NDUFA1|NDUFA2|NDUFA3|NDUFA7|NDUFA8|NDUFA9|NDUFB4|NDUFB5|NDUFB6|NDUFB8|NDUFC2|NDUFS4|NDUFS5|SDHB|SDHD|UQCRH|COX7A2L|COX5A|UQCRQ|UQCR10|NDUFA13|CYCS|NDUFB11|NDUFA12|COA6	-7.6
GO Cellular Components	GO:0005746	mitochondrial respirasome	-9.9	COX6B1|COX6C|COX7A1|COX7A2P2|COX7B|COX15|COX3|CYTB|NDUFA1|NDUFA2|NDUFA3|NDUFA7|NDUFA8|NDUFA9|NDUFB4|NDUFB5|NDUFB6|NDUFB8|NDUFC2|NDUFS4|NDUFS5|SDHB|SDHD|UQCRH|COX7A2L|COX5A|UQCRQ|UQCR10|NDUFA13|NDUFB11|NDUFA12	-7.2
GO Cellular Components	GO:0022625	cytosolic large ribosomal subunit	-8.3	RPL7|RPL9|RPL10|RPL11|RPL17|RPL18|RPL23A|RPL24|RPL27|RPL30|RPL27A|RPL29|RPL31|RPL32|RPL34|RPL35A|RPL37|RPL37A|RPL38|RPL39|RPL23|RPL7L1	-5.6
GO Cellular Components	GO:0016469	proton-transporting two-sector ATPase complex	-6.6	ATP5F1A|ATP5F1E|ATP5MC1|ATP5MC3|ATP5ME|ATP6V1C1|ATP6V0B|ATP5PO|ATP5MF|ATP6AP2|TCIRG1|ATP5PD|ATP5MG|DMAC2L|ATP6V1D|ATP6V1H|ATP5MK|TMEM199	-4.1
GO Cellular Components	GO:0045259	proton-transporting ATP synthase complex	-6	ATP5F1A|ATP5F1E|ATP5MC1|ATP5MC3|ATP5ME|ATP5PO|ATP5MF|ATP5PD|ATP5MG|DMAC2L|ATP5MK	-3.5
GO Cellular Components	GO:1990204	oxidoreductase complex	-5.9	DLAT|ETFA|GCSH|LDHB|CYTB|NDUFA1|NDUFA2|NDUFA3|NDUFA7|NDUFA8|NDUFA9|NDUFB4|NDUFB5|NDUFB6|NDUFB8|NDUFC2|NDUFS4|NDUFS5|RRM2|SDHB|SDHD|UQCRH|HSD17B8|UQCRQ|UQCR10|DUOX2|NDUFA13|NDUFB11|NDUFA12|CYB5B	-3.4
GO Cellular Components	GO:0042788	polysomal ribosome	-5.8	BTF3|RPL11|RPL18|RPL24|RPL30|RPL31|RPL32|RPL38|RPL39|RPS21|RPS23|RPS28|RPS29	-3.3
GO Cellular Components	GO:0070069	cytochrome complex	-5.4	COX6B1|COX6C|COX7A1|COX7A2P2|COX7B|COX15|COX3|CYTB|UQCRH|COX7A2L|COX5A|UQCRQ|UQCR10|COA6	-3
GO Cellular Components	GO:0005753	mitochondrial proton-transporting ATP synthase complex	-5.3	ATP5F1A|ATP5F1E|ATP5MC1|ATP5MC3|ATP5ME|ATP5PO|ATP5MF|ATP5PD|ATP5MG|ATP5MK	-2.9
GO Cellular Components	GO:0045271	respiratory chain complex I	-5.2	NDUFA1|NDUFA2|NDUFA3|NDUFA7|NDUFA8|NDUFA9|NDUFB4|NDUFB5|NDUFB6|NDUFB8|NDUFC2|NDUFS4|NDUFS5|NDUFA13|NDUFB11|NDUFA12	-2.8
GO Cellular Components	GO:0030964	NADH dehydrogenase complex	-5.2	NDUFA1|NDUFA2|NDUFA3|NDUFA7|NDUFA8|NDUFA9|NDUFB4|NDUFB5|NDUFB6|NDUFB8|NDUFC2|NDUFS4|NDUFS5|NDUFA13|NDUFB11|NDUFA12	-2.8
GO Cellular Components	GO:0005747	mitochondrial respiratory chain complex I	-5.2	NDUFA1|NDUFA2|NDUFA3|NDUFA7|NDUFA8|NDUFA9|NDUFB4|NDUFB5|NDUFB6|NDUFB8|NDUFC2|NDUFS4|NDUFS5|NDUFA13|NDUFB11|NDUFA12	-2.8
GO Cellular Components	GO:0045263	proton-transporting ATP synthase complex, coupling factor F(o)	-5.1	ATP5MC1|ATP5MC3|ATP5ME|ATP5PO|ATP5MF|ATP5PD|ATP5MG|DMAC2L	-2.8
GO Cellular Components	GO:0005762	mitochondrial large ribosomal subunit	-5.1	MRPL23|MRPL33|MRPL19|MRPL3|MRPL42|MRPL13|MRPL18|MRPL2|MRPL51|MRPL48|MRPL14|MRPL36|MRPL11|MRPL9|MRPL43|MRPL52|MTERF4	-2.8
GO Cellular Components	GO:0000315	organellar large ribosomal subunit	-5.1	MRPL23|MRPL33|MRPL19|MRPL3|MRPL42|MRPL13|MRPL18|MRPL2|MRPL51|MRPL48|MRPL14|MRPL36|MRPL11|MRPL9|MRPL43|MRPL52|MTERF4	-2.8
GO Cellular Components	GO:0005759	mitochondrial matrix	-5	ACADL|ALDH2|NUDT2|ATP5F1A|ATP5F1E|AUH|DGUOK|DLAT|ETFA|FDX1|GCSH|GLS|GRSF1|HADHB|HSPD1|IVD|MMUT|NDUFA7|NDUFA9|NDUFB8|PIN4|ABCE1|MRPL23|RPS3|SSBP1|VDAC1|VDAC2|HSD17B8|SUCLG1|SUCLA2|MRPL33|MRPL19|LIAS|MRPL3|HARS2|PRDX5|HIBCH|PPA2|GLS2|MRPL42|MRPL13|MRPL18|GLRX2|MRPS18C|MRPL2|TFB1M|MRPL51|MRPL48|MRPS23|ADPRS|TMLHE|ABHD10|RARS2|GUF1|MRPS14|TFB2M|MRPL14|MRPL36|MRPL11|MRPL9|MAIP1|TEFM|NUBPL|MTERF2|UQCC2…	-2.7
GO Cellular Components	GO:0033177	proton-transporting two-sector ATPase complex, proton-transporting domain	-4.9	ATP5MC1|ATP5MC3|ATP5ME|ATP6V0B|ATP5PO|ATP5MF|ATP6AP2|TCIRG1|ATP5PD|ATP5MG|DMAC2L	-2.6
GO Cellular Components	GO:0005681	spliceosomal complex	-4.7	CIRBP|DDX5|DHX15|HNRNPA1|HNRNPA2B1|HNRNPH1|HNRNPK|HNRNPU|PNN|SRSF1|SNRNP70|SNRPA1|SNRPD2|SNRPF|SNRPG|DDX39B|SF3A2|ZRSR2|TTF2|PRPF18|PRPF4B|PRPF3|RBM5|TXNL4A|LSM6|MTREX|LSM3|RBMX|TRA2A|MYEF2|LSM7|LUC7L3|MAGOHB|LUC7L|SREK1|CCDC12|HNRNPA3	-2.4
GO Cellular Components	GO:0022627	cytosolic small ribosomal subunit	-4.5	RPS3|RPS8|RPS12|RPS13|RPS17|RPS19|RPS20|RPS21|RPS23|RPS24|RPS27|RPS27A|RPS28|RPS29	-2.2
GO Cellular Components	GO:0005761	mitochondrial ribosome	-4	NDUFA7|MRPL23|MRPL33|MRPL19|MRPL3|MRPL42|MRPL13|MRPL18|MRPS18C|MRPL2|MRPL51|MRPL48|MRPS23|MRPS14|MRPL14|MRPL36|MRPL11|MRPL9|MRPL43|MRPL52|MTERF4	-1.7
GO Cellular Components	GO:0000313	organellar ribosome	-4	NDUFA7|MRPL23|MRPL33|MRPL19|MRPL3|MRPL42|MRPL13|MRPL18|MRPS18C|MRPL2|MRPL51|MRPL48|MRPS23|MRPS14|MRPL14|MRPL36|MRPL11|MRPL9|MRPL43|MRPL52|MTERF4	-1.7
GO Cellular Components	GO:0000276	mitochondrial proton-transporting ATP synthase complex, coupling factor F(o)	-3.9	ATP5MC1|ATP5MC3|ATP5ME|ATP5PO|ATP5PD|ATP5MG	-1.7
GO Cellular Components	GO:0097525	spliceosomal snRNP complex	-3.9	SNRNP70|SNRPA1|SNRPD2|SNRPF|SNRPG|DDX39B|SF3A2|PRPF18|PRPF3|TXNL4A|LSM6|LSM3|LSM7|LUC7L3|LUC7L	-1.6
GO Cellular Components	GO:0032592	integral component of mitochondrial membrane	-3.6	SLC25A4|CYTB|SLC25A3|TIMM17A|TOMM40|MTX2|ABCB10|COX16|ARMCX3|TMEM70|MFN1|L2HGDH|MGARP|SMDT1|SFXN1|SFXN2|MICOS13|MTX3|MICOS10|PET100	-1.4
GO Cellular Components	GO:0019908	nuclear cyclin-dependent protein kinase holoenzyme complex	-3.6	CCNT1|CCNT2|CDK7|CDK9|MNAT1|CCNK	-1.4
GO Cellular Components	GO:0015935	small ribosomal subunit	-3.6	RPS3|RPS8|RPS12|RPS13|RPS17|RPS19|RPS20|RPS21|RPS23|RPS24|RPS27|RPS27A|RPS28|RPS29|MRPL42|MRPS18C|MRPS23|MRPS14	-1.4
GO Cellular Components	GO:0071013	catalytic step 2 spliceosome	-3.5	DDX5|HNRNPA1|HNRNPA2B1|HNRNPH1|HNRNPK|HNRNPU|PNN|SRSF1|SNRPA1|SNRPD2|SNRPF|SNRPG|SF3A2|PRPF4B|MTREX|LSM3|RBMX|LSM7|MAGOHB|HNRNPA3	-1.3
GO Cellular Components	GO:0098573	intrinsic component of mitochondrial membrane	-3.4	SLC25A4|CYTB|SLC25A3|TIMM17A|TOMM40|MTX2|ABCB10|COX16|ARMCX3|TMEM70|MFN1|L2HGDH|MGARP|SMDT1|SFXN1|SFXN2|MICOS13|MTX3|MICOS10|PET100	-1.2
GO Cellular Components	GO:0005844	polysome	-3.4	BTF3|RPL11|RPL18|RPL24|RPL30|RPL31|RPL32|RPL38|RPL39|RPS3|RPS21|RPS23|RPS28|RPS29|VBP1|IMPACT	-1.2
GO Cellular Components	GO:0045277	respiratory chain complex IV	-3.3	COX6B1|COX6C|COX7A1|COX7A2P2|COX7B|COX3|COX7A2L|COX5A|COA6	-1.1
GO Cellular Components	GO:0031514	motile cilium	-3.2	ANXA1|BBS2|GSTM3|HSPD1|NPHP1|PAFAH1B1|PKD2|PRKACA|RAN|SORD|VDAC2|IFT88|MKKS|VPS13A|CFAP61|TTLL3|IFT81|MNS1|CFAP44|WDR19|CCDC181|DYNC2H1|SPEF2|SLIRP|EFCAB2|CFAP36|CATSPER2|CEP20|KLC3|CABCOCO1|CCDC39|CFAP99	-1
GO Cellular Components	GO:0030532	small nuclear ribonucleoprotein complex	-3.1	SNRNP70|SNRPA1|SNRPD2|SNRPF|SNRPG|DDX39B|SF3A2|PRPF18|PRPF3|TXNL4A|LSM6|LSM3|LSM7|LUC7L3|LUC7L	-0.88
GO Cellular Components	GO:0005751	mitochondrial respiratory chain complex IV	-2.9	COX6B1|COX6C|COX7A1|COX7A2P2|COX7B|COX3|COX7A2L|COX5A	-0.75
GO Cellular Components	GO:0061793	chromatin lock complex	-2.9	RB1|CBX3|L3MBTL1	-0.72
GO Cellular Components	GO:0008540	proteasome regulatory particle, base subcomplex	-2.8	PSMC1|PSMC2|PSMC3|PSMC5|PSMC6	-0.7
GO Cellular Components	GO:0120114	Sm-like protein family complex	-2.8	SMN1|SNRNP70|SNRPA1|SNRPD2|SNRPF|SNRPG|DDX39B|SF3A2|PRPF18|PRPF3|TXNL4A|LSM6|LSM3|LSM7|LUC7L3|LUC7L	-0.66
GO Cellular Components	GO:0031305	integral component of mitochondrial inner membrane	-2.8	CYTB|SLC25A3|TIMM17A|MTX2|COX16|L2HGDH|SMDT1|SFXN1|SFXN2|MICOS13|MTX3|MICOS10|PET100	-0.64
GO Cellular Components	GO:0046540	U4/U6 x U5 tri-snRNP complex	-2.7	SNRPD2|SNRPF|SNRPG|PRPF18|PRPF3|TXNL4A|LSM6|LSM3|LSM7	-0.62
GO Cellular Components	GO:0097526	spliceosomal tri-snRNP complex	-2.7	SNRPD2|SNRPF|SNRPG|PRPF18|PRPF3|TXNL4A|LSM6|LSM3|LSM7	-0.62
GO Cellular Components	GO:0000502	proteasome complex	-2.7	PSMA2|PSMB3|PSMB4|PSMB7|PSMC1|PSMC2|PSMC3|PSMC5|PSMC6|PSMD8|USP14|UBE3C|PSMD14|UBR1	-0.62
GO Cellular Components	GO:0008024	cyclin/CDK positive transcription elongation factor complex	-2.7	CCNT1|CCNT2|CDK9|CCNK	-0.62
GO Cellular Components	GO:0005741	mitochondrial outer membrane	-2.7	ATP5MC3|BCL2L2|ACSL4|GK|HADHB|IFI27|MT3|RPS27A|UBB|UBC|VDAC1|VDAC2|DNM1L|TOMM40|MTX2|VPS13A|SLC44A1|MTCH1|MTERF3|ARMCX1|ARMCX3|TOMM7|MFN1|CISD1|TRAF3IP3|CYB5B|HINT2|MGARP|RTN4IP1|ATAD1|MICOS13|MTX3|MICOS10|CISD2	-0.61
GO Cellular Components	GO:0031304	intrinsic component of mitochondrial inner membrane	-2.7	CYTB|SLC25A3|TIMM17A|MTX2|COX16|L2HGDH|SMDT1|SFXN1|SFXN2|MICOS13|MTX3|MICOS10|PET100	-0.58
GO Cellular Components	GO:0005838	proteasome regulatory particle	-2.5	PSMC1|PSMC2|PSMC3|PSMC5|PSMC6|PSMD8|PSMD14	-0.43
GO Cellular Components	GO:0032806	carboxy-terminal domain protein kinase complex	-2.4	CCNT1|CCNT2|CDK7|CDK9|MNAT1|CCNK	-0.35
GO Cellular Components	GO:0032300	mismatch repair complex	-2.4	MLH1|MSH2|PMS1|MLH3	-0.35
GO Cellular Components	GO:0005688	U6 snRNP	-2.4	DDX39B|LSM6|LSM3|LSM7	-0.35
GO Cellular Components	GO:0098799	outer mitochondrial membrane protein complex	-2.4	TOMM40|MTX2|TOMM7|MFN1|MICOS13|MTX3|MICOS10	-0.33
GO Cellular Components	GO:1905369	endopeptidase complex	-2.3	PSMA2|PSMB3|PSMB4|PSMB7|PSMC1|PSMC2|PSMC3|PSMC5|PSMC6|PSMD8|USP14|UBE3C|PSMD14|COLEC10|HTRA2|UBR1	-0.28
GO Cellular Components	GO:0031597	cytosolic proteasome complex	-2.3	PSMC5|PSMC6|PSMD14	-0.28
GO Cellular Components	GO:0098556	cytoplasmic side of rough endoplasmic reticulum membrane	-2.3	RPL27|RPS28|RPS29	-0.28
GO Cellular Components	GO:0005588	collagen type V trimer	-2.3	COL5A1|COL16A1|COL5A3	-0.28
GO Cellular Components	GO:0034657	GID complex	-2.3	MAEA|ARMC8|RMND5A	-0.28
GO Cellular Components	GO:0071010	prespliceosome	-2.3	SNRNP70|SNRPG|SF3A2|LSM7|LUC7L3|LUC7L	-0.25
GO Cellular Components	GO:0005685	U1 snRNP	-2.3	SNRNP70|SNRPD2|SNRPF|SNRPG|LUC7L3|LUC7L	-0.25
GO Cellular Components	GO:0071004	U2-type prespliceosome	-2.3	SNRNP70|SNRPG|SF3A2|LSM7|LUC7L3|LUC7L	-0.25
GO Cellular Components	GO:0033178	proton-transporting two-sector ATPase complex, catalytic domain	-2.3	ATP5F1A|ATP5F1E|ATP6V1C1|ATP5PO|ATP6V1D|ATP6V1H	-0.25
GO Cellular Components	GO:0005732	sno(s)RNA-containing ribonucleoprotein complex	-2.2	RRP9|NOLC1|RPP30|RPP40|LSM6|POP5|NHP2	-0.24
GO Cellular Components	GO:0031968	organelle outer membrane	-2.2	ATP5MC3|BCL2L2|ACSL4|GK|HADHB|IFI27|MT3|RPS27A|UBB|UBC|VDAC1|VDAC2|DNM1L|TOMM40|MTX2|VPS13A|SLC44A1|MTCH1|MTERF3|ARMCX1|ARMCX3|TOMM7|MFN1|CISD1|TRAF3IP3|CYB5B|HINT2|MGARP|RTN4IP1|ATAD1|MICOS13|SYNE3|MTX3|MICOS10|CISD2	-0.24
GO Cellular Components	GO:0019867	outer membrane	-2.2	ATP5MC3|BCL2L2|ACSL4|GK|HADHB|IFI27|MT3|RPS27A|UBB|UBC|VDAC1|VDAC2|DNM1L|TOMM40|MTX2|VPS13A|SLC44A1|MTCH1|MTERF3|ARMCX1|ARMCX3|TOMM7|MFN1|CISD1|TRAF3IP3|CYB5B|HINT2|MGARP|RTN4IP1|ATAD1|MICOS13|SYNE3|MTX3|MICOS10|CISD2	-0.21
GO Cellular Components	GO:1990498	mitotic spindle microtubule	-2.2	CLTC|HNRNPU|HAUS2|HAUS3|HAUS1	-0.19
GO Cellular Components	GO:0016471	vacuolar proton-transporting V-type ATPase complex	-2.1	ATP6V1C1|ATP6V0B|ATP6AP2|TCIRG1|ATP6V1D|ATP6V1H|TMEM199	-0.15
GO Cellular Components	GO:0022624	proteasome accessory complex	-2.1	PSMC1|PSMC2|PSMC3|PSMC5|PSMC6|PSMD8|PSMD14	-0.15
GO Cellular Components	GO:0005643	nuclear pore	-2.1	CETN3|KPNA3|IPO5|RAN|SUMO1|VPS4B|NUP155|NUP93|NXF1|NUP160|CHMP5|NUP133|EIF5A2|PARP11|CHMP1B|NUP35	-0.13
GO Molecular Functions	GO:0003735	structural constituent of ribosome	-18	NDUFA7|RPL7|RPL9|RPL10|RPL11|RPL17|RPL18|RPL23A|MRPL23|RPL24|RPL27|RPL30|RPL27A|RPL29|RPL31|RPL32|RPL34|RPL35A|RPL37|RPL37A|RPL38|RPL39|RPS3|RPS8|RPS12|RPS13|RPS17|RPS19|RPS20|RPS21|RPS23|RPS24|RPS27|RPS27A|RPS28|RPS29|RPL23|MRPL33|MRPL19|MRPL3|MRPL42|MRPL13|MRPL18|MRPS18C|MRPL2|MRPL51|MRPS23|MRPS14|MRPL14|MRPL36|MRPL11|MRPL9|MRPL43|MRPL52|RPL22L1|RPL7L1	-14
GO Molecular Functions	GO:0009055	electron transfer activity	-8.6	ADH5|ALDH2|COX6B1|COX7A1|COX7A2P2|COX7B|COX15|ETFA|FDX1|COX3|CYTB|NDUFA1|NDUFA2|NDUFA3|NDUFA7|NDUFA8|NDUFA9|NDUFB4|NDUFB5|NDUFB6|NDUFB8|NDUFC2|NDUFS4|NDUFS5|QDPR|SDHB|SDHD|UQCRH|COX7A2L|COX5A|UQCR10|GLRX2|CYCS|NDUFA12|FDX2	-6
GO Molecular Functions	GO:0015453	oxidoreduction-driven active transmembrane transporter activity	-8	COX6B1|COX7A1|COX7B|COX15|COX3|CYTB|NDUFA1|NDUFA2|NDUFA3|NDUFA7|NDUFA8|NDUFA9|NDUFB4|NDUFB5|NDUFB6|NDUFB8|NDUFC2|NDUFS4|NDUFS5|UQCRH|COX7A2L|COX5A|UQCR10|NDUFA12	-5.4
GO Molecular Functions	GO:0015399	primary active transmembrane transporter activity	-6.5	ABCB7|ATP6V1C1|ATP6V0B|COX6B1|COX7A1|COX7B|COX15|ABCC1|COX3|CYTB|NDUFA1|NDUFA2|NDUFA3|NDUFA7|NDUFA8|NDUFA9|NDUFB4|NDUFB5|NDUFB6|NDUFB8|NDUFC2|NDUFS4|NDUFS5|ABCD3|ABCC8|UQCRH|COX7A2L|COX5A|TCIRG1|ABCA7|ABCB10|UQCR10|ATP6V1D|ATP6V1H|NDUFA12|ATP13A3|ABCC10|ABCA13	-4.1
GO Molecular Functions	GO:0003954	NADH dehydrogenase activity	-5.8	NQO1|NDUFA1|NDUFA2|NDUFA3|NDUFA7|NDUFA8|NDUFA9|NDUFB4|NDUFB5|NDUFB6|NDUFB8|NDUFC2|NDUFS4|NDUFS5|AIFM1|NDUFA12	-3.4
GO Molecular Functions	GO:0050136	NADH dehydrogenase (quinone) activity	-5.4	NQO1|NDUFA1|NDUFA2|NDUFA3|NDUFA7|NDUFA8|NDUFA9|NDUFB4|NDUFB5|NDUFB6|NDUFB8|NDUFC2|NDUFS4|NDUFS5|NDUFA12	-3
GO Molecular Functions	GO:0015078	proton transmembrane transporter activity	-5.1	SLC25A4|ATP5F1A|ATP5F1E|ATP5MC1|ATP5MC3|ATP5ME|ATP6V1C1|ATP6V0B|ATP5PO|COX6B1|COX7A1|COX7B|COX15|COX3|CYTB|SLC25A3|SLC9A5|UQCRH|COX7A2L|COX5A|ATP5MF|TCIRG1|ATP5PD|ATP5MG|DMAC2L|UQCR10|ATP6V1D|ATP6V1H	-2.8
GO Molecular Functions	GO:0003955	NAD(P)H dehydrogenase (quinone) activity	-4.9	NQO1|NDUFA1|NDUFA2|NDUFA3|NDUFA7|NDUFA8|NDUFA9|NDUFB4|NDUFB5|NDUFB6|NDUFB8|NDUFC2|NDUFS4|NDUFS5|NDUFA12	-2.6
GO Molecular Functions	GO:0008137	NADH dehydrogenase (ubiquinone) activity	-4.8	NDUFA1|NDUFA2|NDUFA3|NDUFA7|NDUFA8|NDUFA9|NDUFB4|NDUFB5|NDUFB6|NDUFB8|NDUFC2|NDUFS4|NDUFS5|NDUFA12	-2.5
GO Molecular Functions	GO:0016655	oxidoreductase activity, acting on NAD(P)H, quinone or similar compound as acceptor	-4.6	NQO1|NDUFA1|NDUFA2|NDUFA3|NDUFA7|NDUFA8|NDUFA9|NDUFB4|NDUFB5|NDUFB6|NDUFB8|NDUFC2|NDUFS4|NDUFS5|TP53I3|NDUFA12	-2.3
GO Molecular Functions	GO:0016874	ligase activity	-4.3	ATP5F1A|ATP5F1E|ATP5ME|ATP5PO|ACSL4|GART|HARS1|IARS1|MARS1|RARS1|TARS1|UBA7|YARS1|RTCA|SUCLG1|SUCLA2|NAE1|ATP5MF|UBA2|SAE1|FARSB|ATP5PD|ATP5MG|HARS2|TTLL3|MOCS3|ASNSD1|UBA6|RARS2|RIMKLB|TTLL7|GHDC|MARS2|GATC	-2
GO Molecular Functions	GO:0016651	oxidoreductase activity, acting on NAD(P)H	-4.2	COX15|NQO1|NDUFA1|NDUFA2|NDUFA3|NDUFA7|NDUFA8|NDUFA9|NDUFB4|NDUFB5|NDUFB6|NDUFB8|NDUFC2|NDUFS4|NDUFS5|AIFM1|TP53I3|DUOX2|RNLS|NDUFA12	-2
GO Molecular Functions	GO:0036402	proteasome-activating activity	-4	PSMC1|PSMC2|PSMC3|PSMC5|PSMC6	-1.8
GO Molecular Functions	GO:0003729	mRNA binding	-3.7	ACO1|AUH|CIRBP|CSTF2|DDX3X|DDX5|EIF4A1|ETF1|FUS|GRSF1|HNRNPA2B1|HNRNPK|HNRNPU|RPL7|RPL24|RPS3|RPS13|SRSF1|SRSF5|SRSF6|SNRNP70|TIAL1|TAF15|DENR|EIF2S2|G3BP1|RBM5|NXF1|HNRNPA0|NUDT21|CPSF6|CSTF2T|TARDBP|RBMX|MRPL13|MYEF2|LUC7L3|NHP2|LUC7L|THOC2|ESRP2|ANGEL2|YTHDC1|HNRNPLL|DHX36|HNRNPA3|RBM20|NANOS3	-1.4
GO Molecular Functions	GO:0008641	ubiquitin-like modifier activating enzyme activity	-3.6	UBA7|NAE1|UBA2|SAE1|MOCS3|UBA6	-1.4
GO Molecular Functions	GO:0031386	protein tag	-3.6	NEDD8|RPS27A|UBB|UBC|SUMO1|URM1	-1.4
GO Molecular Functions	GO:0046933	proton-transporting ATP synthase activity, rotational mechanism	-3.2	ATP5F1A|ATP5F1E|ATP5ME|ATP5PO|ATP5MF|ATP5PD|ATP5MG	-1
GO Molecular Functions	GO:0070404	NADH binding	-2.9	QDPR|HSD17B8|RNLS	-0.72
GO Molecular Functions	GO:0030492	hemoglobin binding	-2.9	HBB|SLC4A1|AHSP	-0.72
GO Molecular Functions	GO:0055105	ubiquitin-protein transferase inhibitor activity	-2.8	RPL11|RPL37|RPS20|RPL23|GLMN	-0.7
GO Molecular Functions	GO:0004129	cytochrome-c oxidase activity	-2.8	COX6B1|COX7A1|COX7B|COX15|COX3|COX7A2L|COX5A	-0.69
GO Molecular Functions	GO:0043021	ribonucleoprotein complex binding	-2.7	DDX3X|DDX5|ETF1|HNRNPU|EIF6|NME1|ABCE1|SNRPG|EIF4H|NOLC1|PQBP1|EIF1|TMEM147|SEC61B|CPSF6|SEC61G|LTN1|DERL2|IMPACT|EIF5A2|GUF1|DERL1|MAIP1|PHF6|PYM1|TTC5|MALSU1	-0.62
GO Molecular Functions	GO:0016675	oxidoreductase activity, acting on a heme group of donors	-2.7	COX6B1|COX7A1|COX7B|COX15|COX3|COX7A2L|COX5A	-0.57
GO Molecular Functions	GO:0051537	2 iron, 2 sulfur cluster binding	-2.5	FDX1|SDHB|GLRX2|CISD1|FDX2|RFESD|CISD2	-0.43
GO Molecular Functions	GO:0140101	catalytic activity, acting on a tRNA	-2.5	HARS1|IARS1|MARS1|RARS1|TARS1|YARS1|LCMT2|FARSB|RPP30|RPP40|DUS4L|HARS2|NT5C3A|POP5|DTWD1|RARS2|TRMT1L|MARS2|TRMT61A|TYW3|TYW5|METTL6|GATC	-0.42
GO Molecular Functions	GO:0051082	unfolded protein binding	-2.5	CCT6A|HSPD1|NACA|NAP1L4|PFDN1|PPIA|PPIB|SCG5|VBP1|MKKS|PFDN6|CCT2|PTGES3|HTRA2|AHSP|HEATR3|SHQ1|UGGT2|TMEM67|PET100	-0.39
GO Molecular Functions	GO:0140439	protein-cysteine S-stearoyltransferase activity	-2.4	ZDHHC17|ZDHHC6|ZDHHC15|ZDHHC20	-0.35
GO Molecular Functions	GO:0015252	proton channel activity	-2.4	ATP5F1A|ATP5F1E|ATP5ME|ATP5PO|ATP5MF|ATP5PD|ATP5MG	-0.33
GO Molecular Functions	GO:0048763	calcium-induced calcium release activity	-2.3	PKD2|RYR1|RYR3	-0.28
GO Molecular Functions	GO:0051540	metal cluster binding	-2.1	ACO1|FDX1|ABCE1|RPS3|SDHB|LIAS|GLRX2|CDK5RAP1|CISD1|NUBPL|FDX2|RFESD|CISD2	-0.17
GO Molecular Functions	GO:0051536	iron-sulfur cluster binding	-2.1	ACO1|FDX1|ABCE1|RPS3|SDHB|LIAS|GLRX2|CDK5RAP1|CISD1|NUBPL|FDX2|RFESD|CISD2	-0.17
GO Molecular Functions	GO:1990948	ubiquitin ligase inhibitor activity	-2.1	RPL11|RPL37|RPS20|RPL23	-0.17
GO Molecular Functions	GO:0140104	molecular carrier activity	-2.1	ATOX1|HBB|KPNA3|IPO5|PEX19|RAN|TF|XPO1|COX17|EMC8|IPCEF1|EMC4|URM1	-0.12
GO Molecular Functions	GO:0016538	cyclin-dependent protein serine/threonine kinase regulator activity	-2.1	CCNC|CCNG1|CCNT1|CCNT2|CDK4|CDKN2B|MNAT1|CCNK|KAT2B|CCNL2	-0.12
GO Molecular Functions	GO:0004812	aminoacyl-tRNA ligase activity	-2.1	HARS1|IARS1|MARS1|RARS1|TARS1|YARS1|FARSB|HARS2|RARS2|MARS2	-0.12
GO Molecular Functions	GO:0016875	ligase activity, forming carbon-oxygen bonds	-2.1	HARS1|IARS1|MARS1|RARS1|TARS1|YARS1|FARSB|HARS2|RARS2|MARS2	-0.12
KEGG Pathway	hsa03010	Ribosome	-17	RPL7|RPL9|RPL10|RPL11|RPL17|RPL18|RPL23A|MRPL23|RPL24|RPL27|RPL30|RPL27A|RPL29|RPL31|RPL32|RPL34|RPL35A|RPL37|RPL37A|RPL38|RPL39|RPS3|RPS8|RPS12|RPS13|RPS17|RPS19|RPS20|RPS21|RPS23|RPS24|RPS27|RPS27A|RPS28|RPS29|RPL23|MRPL33|MRPL19|MRPL3|MRPL13|MRPL18|MRPS18C|MRPL2|MRPS14|MRPL14|MRPL36|MRPL11|MRPL9|RPL22L1	-14
KEGG Pathway	hsa00190	Oxidative phosphorylation	-17	ATP5F1A|ATP5F1E|ATP5MC1|ATP5MC3|ATP5ME|ATP6V1C1|ATP6V0B|ATP5PO|COX6B1|COX6C|COX7A1|COX7B|COX15|COX3|CYTB|NDUFA1|NDUFA2|NDUFA3|NDUFA7|NDUFA8|NDUFA9|NDUFB4|NDUFB5|NDUFB6|NDUFB8|NDUFC2|NDUFS4|NDUFS5|PPA1|SDHB|SDHD|UQCRH|COX7A2L|COX5A|ATP5MF|COX17|TCIRG1|ATP5PD|ATP5MG|PPA2|UQCRQ|UQCR10|NDUFA13|ATP6V1D|ATP6V1H|CYCS|NDUFB11|NDUFA12	-14
KEGG Pathway	hsa05012	Parkinson disease	-14	SLC25A4|ATP5F1A|ATP5F1E|ATP5MC1|ATP5MC3|ATP5PO|COX6B1|COX6C|COX7A1|COX7B|COX3|CYTB|NDUFA1|NDUFA2|NDUFA3|NDUFA7|NDUFA8|NDUFA9|NDUFB4|NDUFB5|NDUFB6|NDUFB8|NDUFC2|NDUFS4|NDUFS5|PRKACA|PSMA2|PSMB3|PSMB4|PSMB7|PSMC1|PSMC2|PSMC3|PSMC5|PSMC6|PSMD8|RPS27A|RYR3|SDHB|SDHD|SNCA|TXN|UBB|UBC|UBA7|UQCRH|VDAC1|VDAC2|XBP1|SEM1|COX7A2L|COX5A|PSMD14|ATP5PD|SLC39A14|UQCRQ|HTRA2|UQCR10|NDUFA13|CYCS|NDUFB11|MFN1|NDUF…	-12
KEGG Pathway	hsa05014	Amyotrophic lateral sclerosis	-11	ATP5F1A|ATP5F1E|ATP5MC1|ATP5MC3|ATP5PO|COX6B1|COX6C|COX7A1|COX7B|MAPK14|FUS|HNRNPA1|HNRNPA2B1|COX3|CYTB|NDUFA1|NDUFA2|NDUFA3|NDUFA7|NDUFA8|NDUFA9|NDUFB4|NDUFB5|NDUFB6|NDUFB8|NDUFC2|NDUFS4|NDUFS5|PPP3CB|PPP3R1|MAPK11|PSMA2|PSMB3|PSMB4|PSMB7|PSMC1|PSMC2|PSMC3|PSMC5|PSMC6|PSMD8|RAB1A|SDHB|SDHD|UQCRH|VDAC1|XBP1|SEM1|COX7A2L|COX5A|NUP155|NUP93|MATR3|PSMD14|TOMM40|ATP5PD|NXF1|NUP160|TARDBP|UQCRQ|TBK1|U…	-9.2
KEGG Pathway	hsa04714	Thermogenesis	-10	ADRB3|ATP5F1A|ATP5F1E|ATP5MC1|ATP5MC3|ATP5ME|ATP5PO|COX6B1|COX6C|COX7A1|COX7B|COX15|MAPK14|ACSL4|COX3|CYTB|NDUFA1|NDUFA2|NDUFA3|NDUFA7|NDUFA8|NDUFA9|NDUFB4|NDUFB5|NDUFB6|NDUFB8|NDUFC2|NDUFS4|NDUFS5|NPR1|PRKAA1|PRKAB2|PRKACA|MAPK11|SDHB|SDHD|UQCRH|COX7A2L|COX5A|ATP5MF|COX17|ATP5PD|ATP5MG|UQCRQ|RPS6KA6|NDUFAF4|UQCR10|NDUFA13|COX16|NDUFB11|NDUFA12|NDUFAF5|COX14|NDUFAF2|COA6|COA5	-8.2
KEGG Pathway	hsa05020	Prion disease	-10	SLC25A4|ATP5F1A|ATP5F1E|ATP5MC1|ATP5MC3|ATP5PO|C1QA|COX6B1|COX6C|COX7A1|COX7B|MAPK14|COX3|CYTB|NDUFA1|NDUFA2|NDUFA3|NDUFA7|NDUFA8|NDUFA9|NDUFB4|NDUFB5|NDUFB6|NDUFB8|NDUFC2|NDUFS4|NDUFS5|PPP3CB|PPP3R1|PRKACA|MAPK11|PSMA2|PSMB3|PSMB4|PSMB7|PSMC1|PSMC2|PSMC3|PSMC5|PSMC6|PSMD8|RYR1|RYR3|SDHB|SDHD|UQCRH|VDAC1|VDAC2|SEM1|COX7A2L|COX5A|PSMD14|ATP5PD|UQCRQ|UQCR10|NDUFA13|CYCS|NDUFB11|NDUFA12|KLC3|TUBB2B	-8.2
KEGG Pathway	hsa05016	Huntington disease	-7.6	SLC25A4|ATP5F1A|ATP5F1E|ATP5MC1|ATP5MC3|ATP5PO|CLTC|COX6B1|COX6C|COX7A1|COX7B|HDAC1|COX3|CYTB|NDUFA1|NDUFA2|NDUFA3|NDUFA7|NDUFA8|NDUFA9|NDUFB4|NDUFB5|NDUFB6|NDUFB8|NDUFC2|NDUFS4|NDUFS5|POLR2B|POLR2F|MAP2K7|PSMA2|PSMB3|PSMB4|PSMB7|PSMC1|PSMC2|PSMC3|PSMC5|PSMC6|PSMD8|SDHB|SDHD|UQCRH|VDAC1|VDAC2|SEM1|COX7A2L|COX5A|PSMD14|ATP5PD|UQCRQ|UQCR10|NDUFA13|CYCS|NDUFB11|ATG2B|NDUFA12|DNAH7|KLC3|TUBB2B	-5.9
KEGG Pathway	hsa05208	Chemical carcinogenesis - reactive oxygen species	-7.5	SLC25A4|ATP5F1A|ATP5F1E|ATP5MC1|ATP5MC3|ATP5PO|CHUK|COX6B1|COX6C|COX7A1|COX7B|MAPK14|NQO1|GSTA4|GSTM3|MGST3|COX3|CYTB|NDUFA1|NDUFA2|NDUFA3|NDUFA7|NDUFA8|NDUFA9|NDUFB4|NDUFB5|NDUFB6|NDUFB8|NDUFC2|NDUFS4|NDUFS5|MAPK11|MAP2K1|MAP2K7|SDHB|SDHD|UQCRH|VDAC1|VDAC2|COX7A2L|COX5A|GSTO1|ATP5PD|UQCRQ|UQCR10|NDUFA13|NDUFB11|NDUFA12	-5.9
KEGG Pathway	hsa04932	Non-alcoholic fatty liver disease	-7.1	COX6B1|COX6C|COX7A1|COX7B|MAPK14|LEPR|COX3|CYTB|NDUFA1|NDUFA2|NDUFA3|NDUFA7|NDUFA8|NDUFA9|NDUFB4|NDUFB5|NDUFB6|NDUFB8|NDUFC2|NDUFS4|NDUFS5|PRKAA1|PRKAB2|MAPK11|SDHB|SDHD|MLX|UQCRH|XBP1|COX7A2L|COX5A|UQCRQ|UQCR10|NDUFA13|CYCS|NDUFB11|NDUFA12	-5.5
KEGG Pathway	hsa05022	Pathways of neurodegeneration - multiple diseases	-6.9	SLC25A4|ATP5F1A|ATP5F1E|ATP5MC1|ATP5MC3|ATP5PO|COX6B1|COX6C|COX7A1|COX7B|MAPK14|FUS|COX3|CYTB|NDUFA1|NDUFA2|NDUFA3|NDUFA7|NDUFA8|NDUFA9|NDUFB4|NDUFB5|NDUFB6|NDUFB8|NDUFC2|NDUFS4|NDUFS5|PPP3CB|PPP3R1|MAPK11|MAP2K1|MAP2K7|PSMA2|PSMB3|PSMB4|PSMB7|PSMC1|PSMC2|PSMC3|PSMC5|PSMC6|PSMD8|RAB1A|RPS27A|RYR1|RYR3|SDHB|SDHD|SNCA|UBB|UBC|UBA7|UQCRH|VDAC1|VDAC2|XBP1|SEM1|AXIN2|COX7A2L|COX5A|PSMD14|TOMM40|ATP5PD…	-5.3
KEGG Pathway	hsa05010	Alzheimer disease	-6.4	SLC25A4|ATP5F1A|ATP5F1E|ATP5MC1|ATP5MC3|ATP5PO|CHUK|COX6B1|COX6C|COX7A1|COX7B|COX3|CYTB|NDUFA1|NDUFA2|NDUFA3|NDUFA7|NDUFA8|NDUFA9|NDUFB4|NDUFB5|NDUFB6|NDUFB8|NDUFC2|NDUFS4|NDUFS5|PPP3CB|PPP3R1|MAP2K1|MAP2K7|PSMA2|PSMB3|PSMB4|PSMB7|PSMC1|PSMC2|PSMC3|PSMC5|PSMC6|PSMD8|RYR3|SDHB|SDHD|SNCA|UQCRH|VDAC1|VDAC2|XBP1|SEM1|AXIN2|NAE1|COX7A2L|COX5A|PSMD14|RTN3|ATP5PD|SLC39A14|UQCRQ|UQCR10|NDUFA13|CYCS|NDUFB…	-5
KEGG Pathway	hsa03040	Spliceosome	-6.4	DDX5|DHX15|FUS|HNRNPA1|HNRNPK|HNRNPU|SRSF1|SRSF5|SRSF6|SNRNP70|SNRPA1|SNRPD2|SNRPF|SNRPG|DDX39B|SF3A2|PRPF18|SRSF9|PRPF3|PQBP1|TXNL4A|LSM6|ACIN1|U2SURP|LSM3|RBMX|TRA2A|LSM7|MAGOHB|THOC2|CCDC12|HNRNPA3	-5
KEGG Pathway	hsa05168	Herpes simplex virus 1 infection	-5.8	BIRC2|CHUK|IFNGR2|PPP1CB|NECTIN2|SRSF1|SRSF5|SRSF6|STAT1|ZNF354A|TRAF5|ZFP37|ZNF12|ZNF14|ZNF182|ZNF23|ZNF84|ZNF136|ZNF184|ZNF214|SRSF9|ZNF432|ZNF256|NXF1|ZNF211|ZFP30|ZNF658|TBK1|CYCS|ZSCAN32|ZNF331|ZNF248|ZNF77|ZNF667|ZNF343|ZNF613|ZNF566|ZNF300|ZFP28|ZFP90|ZNF565|ZNF558|ZNF550|ZNF846|ZNF621|ZNF454|ZNF181|ZFP57|ZNF829|ZNF470|ZNF772|ZNF705A|ZNF732|ZNF783	-4.3
KEGG Pathway	hsa05415	Diabetic cardiomyopathy	-5.5	SLC25A4|ATP5F1A|ATP5F1E|ATP5MC1|ATP5MC3|ATP5PO|COX6B1|COX6C|COX7A1|COX7B|MAPK14|COX3|CYTB|NDUFA1|NDUFA2|NDUFA3|NDUFA7|NDUFA8|NDUFA9|NDUFB4|NDUFB5|NDUFB6|NDUFB8|NDUFC2|NDUFS4|NDUFS5|PPP1CB|PTPA|MAPK11|SDHB|SDHD|UQCRH|VDAC1|VDAC2|COX7A2L|COX5A|ATP5PD|UQCRQ|UQCR10|NDUFA13|NDUFB11|NDUFA12	-4.1
KEGG Pathway	hsa05171	Coronavirus disease - COVID-19	-5.3	C1QA|CHUK|MAPK14|MAPK11|RPL7|RPL9|RPL10|RPL11|RPL17|RPL18|RPL23A|RPL24|RPL27|RPL30|RPL27A|RPL29|RPL31|RPL32|RPL34|RPL35A|RPL37|RPL37A|RPL38|RPL39|RPS3|RPS8|RPS12|RPS13|RPS17|RPS19|RPS20|RPS21|RPS23|RPS24|RPS27|RPS27A|RPS28|RPS29|STAT1|RPL23|TBK1|RPL22L1	-3.9
KEGG Pathway	hsa03050	Proteasome	-2.9	PSMA2|PSMB3|PSMB4|PSMB7|PSMC1|PSMC2|PSMC3|PSMC5|PSMC6|PSMD8|SEM1|PSMD14	-1.6
KEGG Pathway	hsa03015	mRNA surveillance pathway	-2.5	CSTF2|ETF1|FUS|PNN|PPP1CB|PPP2R5A|DDX39B|PABPN1|NXF1|NUDT21|CPSF6|ACIN1|CSTF2T|TARDBP|CPSF3|MAGOHB|UPF3A|PYM1	-1.2
KEGG Pathway	hsa03430	Mismatch repair	-2.2	MLH1|MSH2|RFC2|RPA1|RPA2|SSBP1|MLH3	-0.94
KEGG Pathway	hsa00970	Aminoacyl-tRNA biosynthesis	-2.1	HARS1|IARS1|MARS1|RARS1|TARS1|YARS1|FARSB|HARS2|RARS2|MARS2|GATC	-0.87
KEGG Pathway	hsa00230	Purine metabolism	-2.1	NUDT2|DGUOK|GART|HPRT1|ITPA|NME1|NPR1|PDE1C|PDE7A|PDE6B|PRPS1|PRPS2|RRM2|NME6|NUDT5|NME7|RRM2B|ADPRM|NTPCR|LACC1|AK9	-0.85
KEGG Pathway	hsa03013	Nucleocytoplasmic transport	-2	KPNA3|IPO5|PNN|RAN|SUMO1|XPO1|DDX39B|NUP155|NUP93|NXF1|ACIN1|NUP160|MAGOHB|NUP133|THOC2|UPF3A|PYM1|NUP35	-0.81

## Sheet: brain-male-biased-gene-1567
Category	GO	Description	LogP	Hits	Log(q-value)
GO Biological Processes	GO:0050804	modulation of chemical synaptic transmission	-14	ABL1|ABR|ACHE|ADCY1|ADRA2A|AGT|APBA1|APOE|ATF4|ADGRB1|BCR|CA2|CAMK2A|CAMK2B|CDH2|CHRNB2|DLG4|DNM1|DVL1|EPHB1|EPHB2|FYN|GRID1|GRIN1|GRIN2B|GRM7|GSK3B|ITPKA|KIT|MAP1A|MECP2|NEUROD2|NRGN|SEPTIN5|PPP3CA|PRKCG|PRKCZ|RAB3A|RARA|RASGRF1|SLC6A1|SRF|STX1A|STXBP1|SYN1|VGF|YWHAH|DGKZ|PPFIA3|SYT7|SYNGR1|DLGAP2|DLGAP1|S1PR2|NRXN1|RAPGEF2|RIMS2|CLSTN3|CACNG3|CACNG2|BAIAP2|CPLX2|CPLX1|CYP46A1|DLGAP4|CLSTN1|ERC1…	-10
GO Biological Processes	GO:0099177	regulation of trans-synaptic signaling	-14	ABL1|ABR|ACHE|ADCY1|ADRA2A|AGT|APBA1|APOE|ATF4|ADGRB1|BCR|CA2|CAMK2A|CAMK2B|CDH2|CHRNB2|DLG4|DNM1|DVL1|EPHB1|EPHB2|FYN|GRID1|GRIN1|GRIN2B|GRM7|GSK3B|ITPKA|KIT|MAP1A|MECP2|NEUROD2|NRGN|SEPTIN5|PPP3CA|PRKCG|PRKCZ|RAB3A|RARA|RASGRF1|SLC6A1|SRF|STX1A|STXBP1|SYN1|VGF|YWHAH|DGKZ|PPFIA3|SYT7|SYNGR1|DLGAP2|DLGAP1|S1PR2|NRXN1|RAPGEF2|RIMS2|CLSTN3|CACNG3|CACNG2|BAIAP2|CPLX2|CPLX1|CYP46A1|DLGAP4|CLSTN1|ERC1…	-10
GO Biological Processes	GO:0031175	neuron projection development	-13	ABL1|ACTB|ADCY1|APLP1|APLP2|APOD|APOE|RHOA|RHOG|ADGRB1|BSG|CAMK2A|CDH4|CHRNB2|CRMP1|CSF1R|CTNNA2|CTNND2|DAG1|DLG4|DPYSL2|DSCAM|DVL1|CELSR2|MEGF8|MARK2|EPHB1|EPHB2|ETV1|FGFR2|FYN|GFRA1|GPM6A|GPR37|ARHGAP35|GRM7|GSK3B|PRMT1|ANOS1|KIF5C|LAMB2|LRP4|LYN|MAP1A|MAP6|MECP2|MEF2A|MMP2|NCAM1|NEO1|NFIB|NGFR|NOTCH2|NOTCH3|PAK1|CDK16|PLXNA1|PRKCZ|PTPRM|NECTIN1|RAB3A|RASGRF1|SDC4|SLIT3|SRF|STK11|STXBP1|TRIO|UG…	-9.4
GO Biological Processes	GO:0010975	regulation of neuron projection development	-10	ABL1|AGT|APOE|RHOA|ARSB|ATP1B2|KIF1A|CAMK2B|CDH2|CDH4|CFL1|CHRNB2|CRMP1|CTNNA2|CUX1|DSCAM|DVL1|LPAR1|MEGF8|MARK2|EPHB2|FYN|GAK|GDI1|RAPGEF1|GRN|ARHGAP35|GSK3B|ITGA6|ITPKA|LIMK1|LRP4|LYN|MAP6|MARK1|NFE2L2|PAK1|SERPINF1|PLXNA1|PPP2R5B|PPP3CA|TWF1|PTPRS|SPOCK1|SRF|STK11|NR2F1|THY1|VIM|YWHAH|ULK1|BRSK2|MAP3K13|RAPGEF2|ULK2|TOX|LZTS3|ARHGAP44|BAIAP2|CARM1|SEMA6B|SEMA3C|PDLIM5|EHD1|STMN2|PLXND1|CYFIP1|…	-6.8
GO Biological Processes	GO:0034330	cell junction organization	-9.7	ACHE|ACTB|ACTG1|ANK2|APOE|RHOA|RHOC|BCR|C3|CDH2|CDH5|CSF1R|CTNND2|DCTN1|DLG4|DSCAM|DVL1|EPHB1|EPHB2|FYN|GABRB2|GPM6A|NRG1|ITGA6|ITPKA|JUP|LAMB2|LRP4|MECP2|NF2|NFIA|PFN1|PLEC|PTPRS|NECTIN1|RAB3A|SLC6A1|SNCB|SPTBN2|SRF|SYN1|TGFB1|THY1|TJP1|UGT8|WNT7B|PPFIA1|PKP4|PPFIA3|BSN|WASL|INA|NRXN1|CLSTN3|MTSS1|ARHGAP44|WDR1|CACNG2|CORO2B|BAIAP2|C1QL1|SYNPO|ERC1|PLXND1|CYFIP1|ADGRL3|PIP5K1C|WHRN|SDF4|NLGN3|PC…	-6.5
GO Biological Processes	GO:0048812	neuron projection morphogenesis	-9.4	ABL1|ACTB|ADCY1|APLP1|APLP2|RHOA|RHOG|ADGRB1|BSG|CDH4|CHRNB2|CRMP1|CSF1R|CTNNA2|CTNND2|DAG1|DLG4|DPYSL2|DSCAM|DVL1|CELSR2|EPHB1|EPHB2|ETV1|FGFR2|FYN|GPM6A|ARHGAP35|ANOS1|KIF5C|LAMB2|LRP4|MAP1A|MAP6|MEF2A|NCAM1|NEO1|NFIB|NGFR|NOTCH2|NOTCH3|PAK1|PLXNA1|PRKCZ|PTPRM|NECTIN1|RAB3A|SLIT3|STK11|STXBP1|TRIO|UGT8|WNT7B|ULK1|CDK5R2|WASL|BRSK2|LHX2|NRXN3|NRXN1|ULK2|TUBB3|BAIAP2|SEMA6B|SEMA3C|PLXND1|CYFIP1|C…	-6.3
GO Biological Processes	GO:0050808	synapse organization	-9.3	ACHE|ACTB|ACTG1|APOE|C3|CDH2|CTNND2|DCTN1|DLG4|DSCAM|DVL1|EPHB1|EPHB2|FYN|GABRB2|GPM6A|NRG1|ITPKA|LAMB2|LRP4|MECP2|NFIA|PFN1|PTPRS|RAB3A|SLC6A1|SNCB|SPTBN2|SYN1|WNT7B|PPFIA1|PPFIA3|BSN|WASL|INA|NRXN1|CLSTN3|ARHGAP44|CACNG2|BAIAP2|C1QL1|SYNPO|ERC1|PLXND1|CYFIP1|ADGRL3|SDF4|NLGN3|PCDHGC4|NLGN4X|DLGAP3|TMEM108|LRFN3|ARHGAP39|KIRREL3|NTNG2|ZDHHC12|IGSF21|SHANK3|LRRC4B|SLITRK1|SEZ6|SDK1|LRRTM1|ELFN1	-6.2
GO Biological Processes	GO:0120039	plasma membrane bounded cell projection morphogenesis	-9.2	ABL1|ACTB|ADCY1|APLP1|APLP2|RHOA|RHOG|ADGRB1|BSG|CDH4|CHRNB2|CRMP1|CSF1R|CTNNA2|CTNND2|DAG1|DLG4|DPYSL2|DSCAM|DVL1|CELSR2|EPHB1|EPHB2|ETV1|FGFR2|FYN|GPM6A|ARHGAP35|ANOS1|KIF5C|LAMB2|LRP4|MAP1A|MAP6|MEF2A|NCAM1|NEO1|NFIB|NGFR|NOTCH2|NOTCH3|PAK1|PLXNA1|PRKCZ|PTPRM|NECTIN1|RAB3A|SLIT3|STK11|STXBP1|TRIO|UGT8|WNT7B|ULK1|CDK5R2|WASL|BRSK2|LHX2|NRXN3|NRXN1|ULK2|TUBB3|BAIAP2|SEMA6B|SEMA3C|PLXND1|CYFIP1|C…	-6.1
GO Biological Processes	GO:0048858	cell projection morphogenesis	-9	ABL1|ACTB|ADCY1|APLP1|APLP2|RHOA|RHOG|ADGRB1|BSG|CDH4|CHRNB2|CRMP1|CSF1R|CTNNA2|CTNND2|DAG1|DLG4|DPYSL2|DSCAM|DVL1|CELSR2|EPHB1|EPHB2|ETV1|FGFR2|FYN|GPM6A|ARHGAP35|ANOS1|KIF5C|LAMB2|LRP4|MAP1A|MAP6|MEF2A|NCAM1|NEO1|NFIB|NGFR|NOTCH2|NOTCH3|PAK1|PLXNA1|PRKCZ|PTPRM|NECTIN1|RAB3A|SLIT3|STK11|STXBP1|TRIO|UGT8|WNT7B|ULK1|CDK5R2|WASL|BRSK2|LHX2|NRXN3|NRXN1|ULK2|TUBB3|BAIAP2|SEMA6B|SEMA3C|PLXND1|CYFIP1|C…	-6
GO Biological Processes	GO:0120035	regulation of plasma membrane bounded cell projection organization	-8.9	ABL1|AGT|APOE|RHOA|RHOG|ARSB|ATP1B2|KIF1A|KLF5|CAMK2B|CAPZB|CDH2|CDH4|CFL1|CHRNB2|CRMP1|CTNNA2|CUX1|DSCAM|DVL1|LPAR1|MEGF8|MARK2|EPHB2|MTOR|FYN|GAK|GDI1|GPM6A|RAPGEF1|GRN|GRIN2B|ARHGAP35|GSK3B|HTT|ITGA6|ITPKA|KIT|LIMK1|LRP4|LYN|MAP6|MARK1|NFE2L2|PAK1|ENPP2|SERPINF1|PFN1|PLXNA1|PPP2R5B|PPP3CA|PRKCD|TWF1|PTPRS|SPOCK1|SRF|STK11|NR2F1|THY1|EZR|VIM|YWHAH|ULK1|WASL|BRSK2|MAP3K13|RAPGEF2|ULK2|TOX|LZTS3|…	-5.8
GO Biological Processes	GO:0032990	cell part morphogenesis	-8.8	ABL1|ACTB|ADCY1|APLP1|APLP2|RHOA|RHOG|ADGRB1|BSG|CDH4|CHRNB2|CRMP1|CSF1R|CTNNA2|CTNND2|DAG1|DLG4|DPYSL2|DSCAM|DVL1|CELSR2|EPHB1|EPHB2|ETV1|FGFR2|FYN|GPM6A|ARHGAP35|ANOS1|KIF5C|LAMB2|LRP4|MAP1A|MAP6|MEF2A|NCAM1|NEO1|NFIB|NGFR|NOTCH2|NOTCH3|PAK1|PLEC|PLXNA1|PRKCZ|PTPRM|NECTIN1|RAB3A|SLIT3|STK11|STXBP1|TRIO|UGT8|WNT7B|ULK1|CDK5R2|WASL|BRSK2|LHX2|NRXN3|NRXN1|ULK2|TUBB3|BAIAP2|SEMA6B|SEMA3C|PLXND1|CYF…	-5.8
GO Biological Processes	GO:0031344	regulation of cell projection organization	-8.7	ABL1|AGT|APOE|RHOA|RHOG|ARSB|ATP1B2|KIF1A|KLF5|CAMK2B|CAPZB|CDH2|CDH4|CFL1|CHRNB2|CRMP1|CTNNA2|CUX1|DLG4|DSCAM|DVL1|DVL3|LPAR1|MEGF8|MARK2|EPHB2|MTOR|FYN|GAK|GDI1|GPM6A|RAPGEF1|GRN|GRIN2B|ARHGAP35|GSK3B|HTT|ITGA6|ITPKA|KIT|LIMK1|LRP4|LYN|MAP6|MARK1|NFE2L2|PAK1|ENPP2|SERPINF1|PFN1|PLXNA1|PPP2R5B|PPP3CA|PRKCD|TWF1|PTPRS|SPOCK1|SRF|STK11|NR2F1|THY1|EZR|VIM|YWHAH|ULK1|WASL|BRSK2|MAP3K13|RAPGEF2|ULK2|…	-5.8
GO Biological Processes	GO:0048167	regulation of synaptic plasticity	-8.4	ABL1|ADCY1|AGT|APOE|ATF4|ADGRB1|CAMK2A|CAMK2B|DLG4|EPHB2|GRIN1|GRIN2B|GSK3B|ITPKA|KIT|MAP1A|MECP2|NEUROD2|NRGN|PRKCG|PRKCZ|RAB3A|RARA|RASGRF1|SRF|STXBP1|VGF|YWHAH|PPFIA3|SYT7|SYNGR1|RAPGEF2|RIMS2|BAIAP2|CPLX2|CYP46A1|ERC1|NCDN|CRTC1|NSMF|NSG1|JPH3|BRSK1|SHANK3|LRRTM1|SHISA6|SHISA9	-5.4
GO Biological Processes	GO:0043254	regulation of protein-containing complex assembly	-8.2	ABCA3|ABL1|ADD1|APOE|RHOA|RHOC|CAPZB|CD36|CDH5|DCTN1|FLII|MTOR|GSK3B|HCFC1|NRG1|HSF1|MECP2|MSN|NUMA1|PAK1|PFN1|PPP2R5B|PRKCD|PRKCZ|TWF1|RAB3A|RNF4|SOX9|SPTAN1|SPTBN1|SPTBN2|STX1A|STXBP1|TGFB1|WARS1|ULK1|NCK2|NAPA|ARPC2|TUBB4A|BAIAP2|STMN2|TRIOBP|SIRT2|CYFIP1|CLASP1|VPS39|COTL1|CDC42EP4|EML2|CLIP3|CYFIP2|GIT1|NOP53|CALY|SH3GLB1|TRAPPC12|DACT1|TPPP3|DHX33|NCLN|PMEPA1|CTNNBIP1|SLAIN2|CAMSAP3|PRUNE1|…	-5.3
GO Biological Processes	GO:0032989	cellular component morphogenesis	-8.1	ABCA2|ABL1|ACTB|ACTG1|ADCY1|ANK2|APLP1|APLP2|RHOA|RHOG|ADGRB1|BSG|CDH4|CHRNB2|CRMP1|CSF1R|CTNNA2|CTNND2|DAG1|DLG4|DPYSL2|DSCAM|DVL1|CELSR2|EPHB1|EPHB2|ETV1|FGFR2|FLII|FYN|GPM6A|ARHGAP35|ANOS1|KIF5C|LAMB2|LRP4|MAP1A|MAP6|MEF2A|MYH6|NCAM1|NEO1|NFIB|NGFR|NOTCH2|NOTCH3|PAK1|PLEC|PLXNA1|PRKAR1A|PRKCZ|PTPRM|NECTIN1|RAB3A|SLIT3|SRF|STK11|STXBP1|TRIO|UGT8|WNT7B|ULK1|CDK5R2|WASL|BRSK2|LHX2|NRXN3|NRXN1|ULK…	-5.2
GO Biological Processes	GO:0099536	synaptic signaling	-7.4	ACHE|GRK2|APBA1|APBA2|APOE|DAGLA|CHRM1|CHRNA4|CHRNB2|DAG1|DLG4|DVL1|EPHB2|GABRA3|GABRA5|GABRB2|GNB1|GRID1|GRIN1|GRIN2B|GRM7|GSK3B|NRG1|HTR1D|KCNC4|KCNN1|KCNQ2|KCNQ3|LY6E|LY6H|MECP2|NTSR1|PENK|PNOC|SEPTIN5|PPP3CA|PRKCG|PTPRN2|RAB3A|SLC1A2|SLC6A1|SLC6A3|SNCB|SST|STX1A|STXBP1|SYN1|PPFIA3|PDLIM4|NAPA|CACNA1G|BSN|SYT7|DLGAP2|DLGAP1|NRXN1|GABBR2|RIMS2|CLSTN3|SNPH|CPLX2|CPLX1|HRH3|RPH3A|ERC1|CRTC1|PIP5K…	-4.5
GO Biological Processes	GO:0048667	cell morphogenesis involved in neuron differentiation	-7.4	ABL1|ACTB|ADCY1|APLP1|APLP2|RHOG|ADGRB1|BSG|CDH4|CHRNB2|CRMP1|CSF1R|CTNNA2|CTNND2|DAG1|DLG4|DPYSL2|DSCAM|DVL1|CELSR2|EPHB1|EPHB2|ETV1|FGFR2|FYN|ARHGAP35|ANOS1|KIF5C|LAMB2|LRP4|MAP1A|MAP6|MEF2A|NCAM1|NEO1|NFIB|NGFR|NOTCH2|NOTCH3|PLXNA1|PTPRM|NECTIN1|RAB3A|SLIT3|STK11|STXBP1|TRIO|ULK1|CDK5R2|WASL|BRSK2|LHX2|NRXN3|NRXN1|ULK2|TUBB3|BAIAP2|SEMA6B|SEMA3C|TRIOBP|PLXND1|CYFIP1|WHRN|NLGN3|ROBO4|MAP1S|DSCA…	-4.5
GO Biological Processes	GO:0061564	axon development	-7.3	ABL1|ACTB|ADCY1|APLP1|APLP2|APOD|RHOG|ADGRB1|BSG|CDH4|CHRNB2|CRMP1|CSF1R|CTNNA2|DAG1|DPYSL2|DSCAM|DVL1|MEGF8|MARK2|EPHB1|EPHB2|ETV1|FGFR2|FYN|ARHGAP35|GRM7|ANOS1|KIF5C|LAMB2|MAP1A|MMP2|NCAM1|NEO1|NFIB|NGFR|NOTCH2|NOTCH3|PLXNA1|PTPRM|NECTIN1|RAB3A|SLIT3|STK11|STXBP1|TRIO|ULK1|CDK5R2|BRSK2|LHX2|NRXN3|NRXN1|ULK2|TUBB3|BAIAP2|SEMA6B|SEMA3C|PLXND1|CYFIP1|TNFRSF21|NLGN3|ROBO4|CRTAC1|MAP1S|DSCAML1|AMIGO…	-4.5
GO Biological Processes	GO:0050803	regulation of synapse structure or activity	-7.3	ABL1|APOE|RHOA|KIF1A|ADGRB1|CAMK2B|CDH2|CFL1|CHRNB2|CTNNA2|DAG1|DCTN1|EPHB1|EPHB2|FYN|GPM6A|GRIN2B|ITPKA|LRP4|NEUROD2|NECTIN1|TUBA1A|NRXN1|CLSTN3|LZTS3|ARHGAP44|BAIAP2|PDLIM5|ADGRL1|CLSTN1|CYFIP1|NGEF|NLGN3|SLC17A7|AMIGO1|LRRN1|LRFN3|BHLHB9|ABHD17A|DTNBP1|NTNG2|SHANK3|LRRC4B|STX1B|SLITRK1|DAB2IP|TUBB|LRRTM1|LRRC24	-4.5
GO Biological Processes	GO:0007610	behavior	-7.1	ABCA2|ABL1|ADCY1|ADCY5|AGT|APBA1|APOE|ASTN1|ATP1B2|CHRNA4|CHRNB2|CNTFR|BRINP1|ACE|DCTN1|DLG4|DSCAM|DVL1|EGR1|EPHB2|ETV1|MTOR|FYN|GABRA5|GM2A|GPI|GPR37|GRID1|GRIN1|GRIN2B|HTT|NRG1|HIF1A|KCNK2|KIT|MAP1A|MECP2|MMP17|NEUROD2|NRGN|NTSR1|SERPINF1|PENK|SEPTIN5|PRKCG|PRKCZ|RASGRF1|SELENOP|SLC1A2|SLC6A1|SLC6A3|SLC16A1|SPTBN2|SRF|VGF|WFS1|B4GALT2|MBD2|MTA1|NRXN3|NRXN1|NCOR1|PUM1|NCOA2|C1QL1|EHMT2|CIC|SYT11…	-4.3
GO Biological Processes	GO:0007409	axonogenesis	-6.9	ABL1|ACTB|ADCY1|APLP1|APLP2|RHOG|ADGRB1|BSG|CDH4|CHRNB2|CRMP1|CSF1R|CTNNA2|DAG1|DPYSL2|DSCAM|DVL1|EPHB1|EPHB2|ETV1|FGFR2|FYN|ARHGAP35|ANOS1|KIF5C|LAMB2|MAP1A|NCAM1|NEO1|NFIB|NGFR|NOTCH2|NOTCH3|PLXNA1|PTPRM|NECTIN1|RAB3A|SLIT3|STK11|STXBP1|TRIO|ULK1|CDK5R2|BRSK2|LHX2|NRXN3|NRXN1|ULK2|TUBB3|BAIAP2|SEMA6B|SEMA3C|PLXND1|CYFIP1|NLGN3|ROBO4|MAP1S|DSCAML1|AMIGO1|BCL11B|TRIM46|NDEL1|BRSK1|NTNG2|UNC5A|SLI…	-4.1
GO Biological Processes	GO:0050807	regulation of synapse organization	-6.8	ABL1|APOE|RHOA|KIF1A|ADGRB1|CAMK2B|CDH2|CFL1|CHRNB2|CTNNA2|DAG1|DCTN1|EPHB1|EPHB2|FYN|GPM6A|GRIN2B|ITPKA|LRP4|NEUROD2|NECTIN1|TUBA1A|NRXN1|CLSTN3|LZTS3|ARHGAP44|BAIAP2|PDLIM5|ADGRL1|CLSTN1|CYFIP1|NGEF|NLGN3|AMIGO1|LRRN1|LRFN3|BHLHB9|ABHD17A|DTNBP1|NTNG2|SHANK3|LRRC4B|SLITRK1|DAB2IP|TUBB|LRRTM1|LRRC24	-4.1
GO Biological Processes	GO:0044089	positive regulation of cellular component biogenesis	-6.7	ABCA3|ABL1|AGT|RHOA|RHOC|ADGRB1|CD36|CDC34|CDH5|DAG1|DCTN1|DYNC1H1|LPAR1|EPHB1|EPHB2|MTOR|GPM6A|ARHGAP35|GSK3B|HTT|NRG1|HSF1|KIT|LIMK1|MECP2|MSN|NF2|NUMA1|PAK1|PFN1|PPP2R5B|SDC4|SOX9|SRF|TGFB1|THY1|WARS1|RAB7A|PIP4K2B|ULK1|NCK2|WASL|HGS|NRXN1|CLSTN3|MTSS1|ARPC2|SORBS3|BAIAP2|SYNPO|CLSTN1|ATG2A|CYFIP1|CLASP1|ATP13A2|CDC42EP4|NUP62|SIN3A|CHMP2A|GIT1|RGCC|CALY|SH3GLB1|TPPP3|NLGN3|SMPD3|DHX33|TENM2|A…	-4
GO Biological Processes	GO:0099537	trans-synaptic signaling	-6.6	ACHE|APBA1|APBA2|APOE|DAGLA|CHRM1|CHRNA4|CHRNB2|DAG1|DLG4|DVL1|EPHB2|GABRA3|GABRA5|GABRB2|GRID1|GRIN1|GRIN2B|GRM7|GSK3B|HTR1D|KCNC4|KCNN1|KCNQ2|KCNQ3|MECP2|NTSR1|PENK|PNOC|SEPTIN5|PPP3CA|PRKCG|PTPRN2|RAB3A|SLC1A2|SLC6A1|SLC6A3|SNCB|SST|STX1A|STXBP1|SYN1|PPFIA3|PDLIM4|NAPA|CACNA1G|BSN|SYT7|DLGAP2|DLGAP1|NRXN1|GABBR2|RIMS2|CLSTN3|SNPH|CPLX2|CPLX1|HRH3|RPH3A|ERC1|PIP5K1C|RASD2|NSG1|NLGN3|SLC17A7|NLG…	-3.9
GO Biological Processes	GO:0048168	regulation of neuronal synaptic plasticity	-6.6	AGT|APOE|CAMK2A|CAMK2B|DLG4|EPHB2|GRIN1|GRIN2B|KIT|RAB3A|RASGRF1|VGF|PPFIA3|SYNGR1|NCDN|NSMF|JPH3|SHANK3|SHISA6|SHISA9	-3.9
GO Biological Processes	GO:0000902	cell morphogenesis	-6.5	ABL1|ACTB|ADCY1|APLP1|APLP2|RHOA|RHOG|ATF4|ADGRB1|BCL6|BSG|CAPZB|CASP9|CDH4|CDH5|CHRNB2|CRMP1|CSF1R|CTNNA2|CTNND2|DAG1|DLG4|DPYSL2|DSCAM|DVL1|CELSR2|EPHB1|EPHB2|ETV1|FGFR2|FYN|GPM6A|ARHGAP35|NRG1|ANOS1|KIF5C|LAMB2|LRP4|MAP1A|MAP6|MEF2A|MYH9|NCAM1|NEO1|NFIB|NGFR|NOTCH2|NOTCH3|PAK1|PLEC|PLXNA1|PRKCZ|PTPRM|NECTIN1|RAB3A|SLIT3|SRF|STK11|STXBP1|TRIO|UGT8|WNT7B|ULK1|CDK5R2|WASL|BRSK2|LHX2|NRXN3|NRXN1|U…	-3.9
GO Biological Processes	GO:0007420	brain development	-6.4	ABL1|ACTB|ADCY1|APLP1|APOD|SHROOM2|RHOA|ZFHX3|ATP1B2|ATP2B2|BCR|BMP4|BNIP3|BOK|VPS51|CALM1|CDH2|CHRNB2|COL3A1|CSF1R|CTNNA2|ACE|DPYSL2|S1PR1|CELSR2|EPHB1|EPHB2|FGFR2|FYN|G6PD|GABRA5|GDF10|GRIN1|GRIN2B|ARHGAP35|GSK3B|NRG1|HIF1A|HPCA|MECP2|MEN1|COX1|ND4|NEUROD2|NF2|NFIB|NOTCH3|NRGN|OGDH|OXCT1|PAFAH1B2|POU6F1|PPP3CA|RARA|RFX4|SELENOP|SKI|SLC1A2|SLC6A3|SPTBN2|SRF|NR2F2|TGFBR2|WNT7B|YWHAH|BAG6|B4GALT2|…	-3.8
GO Biological Processes	GO:0098916	anterograde trans-synaptic signaling	-6.4	ACHE|APBA1|APBA2|APOE|CHRM1|CHRNA4|CHRNB2|DLG4|DVL1|GABRA3|GABRA5|GABRB2|GRID1|GRIN1|GRIN2B|GRM7|GSK3B|HTR1D|KCNC4|KCNN1|KCNQ2|KCNQ3|MECP2|NTSR1|PENK|PNOC|SEPTIN5|PPP3CA|PRKCG|PTPRN2|RAB3A|SLC1A2|SLC6A1|SLC6A3|SNCB|SST|STX1A|STXBP1|SYN1|PPFIA3|PDLIM4|NAPA|CACNA1G|BSN|SYT7|DLGAP2|DLGAP1|NRXN1|GABBR2|RIMS2|CLSTN3|SNPH|CPLX2|CPLX1|HRH3|RPH3A|ERC1|PIP5K1C|RASD2|NSG1|NLGN3|SLC17A7|NLGN4X|DNAJC5|BRSK1|…	-3.7
GO Biological Processes	GO:0007268	chemical synaptic transmission	-6.4	ACHE|APBA1|APBA2|APOE|CHRM1|CHRNA4|CHRNB2|DLG4|DVL1|GABRA3|GABRA5|GABRB2|GRID1|GRIN1|GRIN2B|GRM7|GSK3B|HTR1D|KCNC4|KCNN1|KCNQ2|KCNQ3|MECP2|NTSR1|PENK|PNOC|SEPTIN5|PPP3CA|PRKCG|PTPRN2|RAB3A|SLC1A2|SLC6A1|SLC6A3|SNCB|SST|STX1A|STXBP1|SYN1|PPFIA3|PDLIM4|NAPA|CACNA1G|BSN|SYT7|DLGAP2|DLGAP1|NRXN1|GABBR2|RIMS2|CLSTN3|SNPH|CPLX2|CPLX1|HRH3|RPH3A|ERC1|PIP5K1C|RASD2|NSG1|NLGN3|SLC17A7|NLGN4X|DNAJC5|BRSK1|…	-3.7
GO Biological Processes	GO:0031346	positive regulation of cell projection organization	-6.3	ABL1|AGT|APOE|ARSB|ATP1B2|CAMK2B|CDH4|CUX1|DLG4|DSCAM|DVL1|DVL3|MEGF8|MARK2|EPHB2|MTOR|FYN|GDI1|GPM6A|RAPGEF1|GRN|ARHGAP35|GSK3B|HTT|ITGA6|ITPKA|KIT|LIMK1|LYN|MAP6|NFE2L2|ENPP2|SERPINF1|PFN1|PLXNA1|PPP2R5B|TWF1|SRF|STK11|WASL|MAP3K13|RAPGEF2|TOX|ARPC2|BAIAP2|EHD1|STMN2|PLXND1|CYFIP1|CRTC1|CDC42EP4|SS18L1|CDKL3|NCKIPSD|CORO1B|TENM2|AMIGO1|MARK4|EPS8L2|KCTD17|BHLHB9|NDEL1|SLITRK1|DAB2IP|RETREG3	-3.6
GO Biological Processes	GO:0060322	head development	-6.2	ABL1|ACTB|ADCY1|APLP1|APOD|SHROOM2|RHOA|ZFHX3|ATP1B2|ATP2B2|BCR|BMP4|BNIP3|BOK|VPS51|CALM1|CDH2|CHRNB2|COL3A1|CSF1R|CTNNA2|ACE|DPYSL2|S1PR1|CELSR2|EPHB1|EPHB2|FGFR2|FYN|G6PD|GABRA5|GDF10|GRIN1|GRIN2B|ARHGAP35|GSK3B|NRG1|HIF1A|HPCA|MECP2|MEN1|MMP2|COX1|ND4|NEUROD2|NF2|NFIB|NOTCH3|NRGN|OGDH|OXCT1|PAFAH1B2|POU6F1|PPP3CA|RARA|RFX4|SELENOP|SKI|SLC1A2|SLC6A3|SOX9|SPTBN2|SRF|NR2F2|TGFBR2|WNT7B|YWHAH|ZFA…	-3.6
GO Biological Processes	GO:0099003	vesicle-mediated transport in synapse	-5.6	ACTB|ACTG1|AP2A1|AP2A2|AP2M1|DNM1|GAK|SEPTIN5|RAB3A|SH3GL1|SNCB|STX1A|STXBP1|SYN1|PPFIA3|NAPA|SYT7|RIMS2|SNPH|SNAP91|CPLX2|CPLX1|CLSTN1|PIP5K1C|NSG1|CALY|NLGN3|SLC17A7|NLGN4X|DNAJC5|BRSK1|STX1B	-3
GO Biological Processes	GO:0032271	regulation of protein polymerization	-5.6	ABL1|ADD1|RHOA|CAPZB|CDH5|DCTN1|FLII|MTOR|MECP2|NUMA1|PAK1|PFN1|PRKCD|TWF1|SPTAN1|SPTBN1|SPTBN2|NCK2|ARPC2|TUBB4A|BAIAP2|STMN2|TRIOBP|CYFIP1|CLASP1|COTL1|CDC42EP4|EML2|CLIP3|CYFIP2|GIT1|TPPP3|SLAIN2|CAMSAP3|PRUNE1|MLST8|PINK1|TTBK1|SSH2|MYADM|CAMSAP1	-3
GO Biological Processes	GO:0000904	cell morphogenesis involved in differentiation	-5.6	ABL1|ACTB|ADCY1|APLP1|APLP2|RHOA|RHOG|ATF4|ADGRB1|BSG|CASP9|CDH4|CHRNB2|CRMP1|CSF1R|CTNNA2|CTNND2|DAG1|DLG4|DPYSL2|DSCAM|DVL1|CELSR2|EPHB1|EPHB2|ETV1|FGFR2|FYN|ARHGAP35|ANOS1|KIF5C|LAMB2|LRP4|MAP1A|MAP6|MEF2A|MYH9|NCAM1|NEO1|NFIB|NGFR|NOTCH2|NOTCH3|PLXNA1|PTPRM|NECTIN1|RAB3A|SLIT3|SRF|STK11|STXBP1|TRIO|ULK1|CDK5R2|WASL|BRSK2|LHX2|NRXN3|NRXN1|ULK2|WDR1|TUBB3|BAIAP2|SEMA6B|SEMA3C|TRIOBP|SIPA1L3|PLX…	-3
GO Biological Processes	GO:0022604	regulation of cell morphogenesis	-5.4	ABL1|RHOA|RHOC|RHOG|CAMK2B|CAPZB|CFL1|CSF1R|CUX1|DAG1|DLG4|DVL1|DVL3|LPAR1|MARK2|EPHB2|FBLN1|FYN|ARHGAP35|ITPKA|KIT|MSN|MYH9|NEDD9|ENPP2|PLXNA1|SPARC|EZR|RASAL1|MAP3K13|PLAA|RIMS2|WDR1|ARPC2|BAIAP2|TRIOBP|PLXND1|CYFIP1|CDC42EP4|BAMBI|SS18L1|CDKL3|SYT17|BCL11A|CORO1B|PREX1|CPNE5|CACNG7|MYH14|BHLHB9|NTNG2|MYADM|RNF157|FITM2|CAMSAP1|FAM171A1|BCL9L|PALM2AKAP2	-2.9
GO Biological Processes	GO:0030036	actin cytoskeleton organization	-5.3	ABL1|ACTB|ACTG1|ADD1|ADRA2A|SHROOM2|RHOA|RHOC|RHOG|BCL6|BCR|CAPZB|CFL1|S1PR1|EPB41L1|FLII|ARHGAP35|ITPKA|KIT|LIMK1|MARCKS|MEF2A|MYH6|MYH9|NEDD9|NF2|PAK1|PFN1|PLEC|PRKAR1A|TWF1|SPTAN1|SPTBN1|SPTBN2|SRF|TJP1|TPM2|TPM3|EZR|ZYX|NCK2|PDLIM4|WASL|BRSK2|INA|PDLIM7|S1PR2|BCAR1|CDC42BPB|MTSS1|ARHGEF11|ARHGEF17|ELMO1|IQSEC1|WDR1|ARPC2|SORBS3|CORO2B|BAIAP2|NEBL|PDLIM5|IQGAP2|TRIOBP|IQSEC2|SPECC1L|PIP5K1C|AR…	-2.8
GO Biological Processes	GO:0048588	developmental cell growth	-5.2	ABL1|AGT|DVL1|PRMT2|LAMB2|PLXNA1|PRKCZ|SLIT3|SOX9|STK11|TGFBR2|ULK1|LHX2|ULK2|ARIH2|PDLIM5|CYFIP1|CYFIP2|CDKL3|NRN1|NLGN3|PAK6|TMEM108|NDEL1	-2.7
GO Biological Processes	GO:0098815	modulation of excitatory postsynaptic potential	-5.2	DLG4|DVL1|GRIN1|GRIN2B|PRKCZ|STX1A|S1PR2|NRXN1|RIMS2|BAIAP2|NLGN3|CELF4|NLGN4X|TMEM108|SHANK3|STX1B	-2.7
GO Biological Processes	GO:1902903	regulation of supramolecular fiber organization	-5.2	ABL1|ACTG1|ADD1|APOE|RHOA|RHOC|CAPZB|CDH5|CTNNA2|DCTN1|S1PR1|LPAR1|FLII|MTOR|ARHGAP35|LIMK1|MAP1A|MECP2|MID1|NF2|NUMA1|PAK1|PFN1|PRKCD|TWF1|SDC4|SPTAN1|SPTBN1|SPTBN2|TJP1|NCK2|PPFIA1|WASL|MTSS1|WDR1|ARPC2|SORBS3|TUBB4A|CORO2B|BAIAP2|STMN2|TRIOBP|SYNPO|CYFIP1|CLASP1|COTL1|CDC42EP4|ARFIP2|EML2|CLIP3|CYFIP2|GIT1|RGCC|MAP1S|PDXP|CORO1B|SLAIN2|CAMSAP3|PRUNE1|MLST8|SHANK3|SSH2|MYADM|RHPN1|CAMSAP1	-2.7
GO Biological Processes	GO:0040007	growth	-5.1	ABL1|AGT|APBA1|APOD|BMP4|ZFP36L1|KLF5|CDKN1A|COL3A1|DAG1|DVL1|S1PR1|FGFR3|FGFR2|MTOR|GNAS|PRMT2|LAMB2|LRP4|LY6E|NOTCH2|NPPC|PLEC|PLXNA1|PPP3CA|PRKAR1A|PRKCZ|RARA|SGCA|SLC1A2|SLIT3|SOX9|SP2|SPTBN2|SRF|STK11|TGFBR2|WNT7B|ULK1|LARGE1|LHX2|ULK2|ARIH2|PDLIM5|EHMT2|CYFIP1|FKBP8|CLIC4|CYFIP2|CHST11|CDKL3|NRN1|NLGN3|SMPD3|PAK6|ZMIZ1|NLGN4X|TMEM108|NDEL1|CCM2|STK40|SLITRK1|ARID2	-2.6
GO Biological Processes	GO:0048589	developmental growth	-5.1	ABL1|AGT|APBA1|APOD|BMP4|ZFP36L1|KLF5|CDKN1A|COL3A1|DAG1|DVL1|S1PR1|FGFR3|FGFR2|MTOR|GNAS|PRMT2|LAMB2|LRP4|LY6E|NOTCH2|NPPC|PLEC|PLXNA1|PPP3CA|PRKAR1A|PRKCZ|RARA|SGCA|SLC1A2|SLIT3|SOX9|SP2|SPTBN2|SRF|STK11|TGFBR2|WNT7B|ULK1|LARGE1|LHX2|ULK2|ARIH2|PDLIM5|EHMT2|CYFIP1|FKBP8|CLIC4|CYFIP2|CHST11|CDKL3|NRN1|NLGN3|SMPD3|PAK6|ZMIZ1|NLGN4X|TMEM108|NDEL1|CCM2|STK40|SLITRK1|ARID2	-2.6
GO Biological Processes	GO:0060284	regulation of cell development	-5.1	ABL1|ADD1|BMP4|CAMK2B|CDH4|CDH5|CUX1|DAG1|BRINP1|ACE|DSCAM|MEGF8|EPHB2|FBLN1|MTOR|GDI1|GRN|GSK3B|HIF1A|IL6ST|ITPKA|KIT|LIMK1|LRP4|LYN|MAP6|NEDD9|NF2|NOTCH2|NPPC|SERPINF1|PLXNA1|PPP1CC|PPP3CA|PTPRS|SKI|SOX11|SRF|STK11|TGFB1|TGM2|THY1|TTPA|YWHAH|ULK1|PDE5A|MAP3K13|S1PR2|LHX2|NR1D1|RAPGEF2|ULK2|ARPC2|TRIB1|BAIAP2|SEMA6B|SEMA3C|TRIOBP|SIRT2|PLXND1|CYFIP1|SS18L1|SOX8|LEF1|CDKL3|BCL11A|DLL4|APPL2|AMIGO…	-2.6
GO Biological Processes	GO:0050773	regulation of dendrite development	-5.1	ABL1|RHOA|CAMK2B|CHRNB2|CUX1|EPHB2|GSK3B|ITPKA|MARK1|PPP3CA|STK11|YWHAH|RAPGEF2|BAIAP2|CARM1|CYFIP1|CRTC1|NSMF|SS18L1|CDKL3|BCL11A|GORASP1|BHLHB9|KNDC1|SEZ6|DAB2IP	-2.6
GO Biological Processes	GO:1902414	protein localization to cell junction	-5.1	ACTB|ACTG1|CDH5|DLG4|JAK1|KIF5C|MAP1A|NECTIN1|TJP1|BSN|NRXN1|ARHGAP44|CACNG3|CACNG2|BAIAP2|CPLX1|CLSTN1|NSG1|CACNG7|ZDHHC12|STX1B|LRRTM1	-2.6
GO Biological Processes	GO:0016049	cell growth	-5	ABL1|AGT|DVL1|PRMT2|LAMB2|PLXNA1|PRKCZ|SLIT3|SOX9|STK11|TGFBR2|ULK1|LHX2|ULK2|ARIH2|PDLIM5|CYFIP1|CYFIP2|CDKL3|NRN1|NLGN3|PAK6|TMEM108|NDEL1	-2.6
GO Biological Processes	GO:0099601	regulation of neurotransmitter receptor activity	-5	DLG4|EPHB2|RASGRF1|SLC6A9|DLGAP2|DLGAP1|CACNG3|CACNG2|DLGAP4|NPTXR|NLGN3|DLGAP3|CACNG7|PINK1|LYNX1|SHANK3|SHISA6|SHISA9	-2.5
GO Biological Processes	GO:0007612	learning	-5	ABL1|AGT|CHRNB2|DLG4|EPHB2|FYN|GABRA5|GRIN1|HTT|HIF1A|KIT|MAP1A|MECP2|NEUROD2|NRGN|NTSR1|SLC6A1|SRF|B4GALT2|NRXN3|NRXN1|C1QL1|CIC|SYT11|GIT1|NLGN3|PAK6|JPH3|NLGN4X|BRSK1|PPP1R9B|SHANK3|LRRN4	-2.5
GO Biological Processes	GO:0050890	cognition	-4.8	ABL1|ADCY1|AGT|APOE|CHRM1|CHRNA4|CHRNB2|BRINP1|DLG4|EPHB2|FYN|GABRA5|GM2A|GPI|GRIN1|GRIN2B|HTT|HIF1A|KCNK2|KIT|MAP1A|MECP2|NEUROD2|NRGN|NTSR1|SERPINF1|PRKCG|PRKCZ|RASGRF1|SLC6A1|SRF|B4GALT2|NRXN3|NRXN1|DGCR2|C1QL1|EHMT2|HRH3|CIC|CYFIP1|SYT11|CRTC1|GIT1|NLGN3|SOBP|PAK6|JPH3|NLGN4X|BHLHB9|BRSK1|TTBK1|PPP1R9B|SHANK3|LRRN4	-2.4
GO Biological Processes	GO:0007416	synapse assembly	-4.8	ACHE|CDH2|DSCAM|DVL1|EPHB2|GABRB2|GPM6A|NRG1|LRP4|MECP2|SPTBN2|BSN|NRXN1|CLSTN3|PLXND1|ADGRL3|NLGN3|NLGN4X|KIRREL3|NTNG2|ZDHHC12|SHANK3|SLITRK1|SDK1	-2.4
GO Biological Processes	GO:0051960	regulation of nervous system development	-4.8	ADGRB1|CAMK2B|CDH4|CUX1|DAG1|BRINP1|ACE|DSCAM|MEGF8|EPHB1|EPHB2|MTOR|GDI1|HIF1A|IL6ST|ITPKA|KIT|LIMK1|LRP4|LYN|MAP6|NF2|SERPINF1|PLXNA1|PPP1CC|PPP3CA|PTPRS|RARA|SKI|SOX11|SRF|STK11|TGFB1|TGM2|THY1|YWHAH|ULK1|MAP3K13|LHX2|NRXN1|NR1D1|RAPGEF2|ULK2|CLSTN3|BAIAP2|SEMA6B|SEMA3C|CLSTN1|SIRT2|PLXND1|CYFIP1|SS18L1|TNFRSF21|SOX8|LEF1|CDKL3|NLGN3|DLL4|APPL2|AMIGO1|LRRN1|PRUNE1|ZNF335|GORASP1|TRIM46|BHLHB9|…	-2.4
GO Biological Processes	GO:0099068	postsynapse assembly	-4.8	CDH2|EPHB2|LRP4|NRXN1|NLGN3|NLGN4X|NTNG2|ZDHHC12|SHANK3	-2.4
GO Biological Processes	GO:0031331	positive regulation of cellular catabolic process	-4.7	ABCA2|ADRA2A|AKT2|SLC25A5|APOE|BNIP3|ZFP36L1|PTTG1IP|CSNK1E|DCN|DVL1|MTOR|GSK3B|HTT|HIF1A|HSF1|LRP1|MSN|NFE2L2|CNOT3|PAFAH1B2|PRKCD|SGTA|SUMO2|STK11|TSC2|UVRAG|EZR|ZFP36|LAPTM5|BAG6|AXIN1|PIP4K2B|ULK1|BAG3|GTPBP1|PUM1|ULK2|KEAP1|TOB1|TRIB1|ARIH2|ZER1|SIRT2|TNRC6B|ATG2A|SH3BP4|GPSM1|ZBTB20|PABPC1|AGO2|NOP53|SH3GLB1|WAC|DACT1|FZR1|RNF31|SAMD4B|EIF4ENIF1|RGMA|PNPLA2|RPTOR|TP53INP2|MLST8|PINK1|TRIM8|…	-2.3
GO Biological Processes	GO:0010976	positive regulation of neuron projection development	-4.7	ABL1|AGT|APOE|ARSB|ATP1B2|CAMK2B|DVL1|MARK2|EPHB2|FYN|RAPGEF1|GRN|ARHGAP35|ITGA6|ITPKA|LYN|NFE2L2|SERPINF1|PPP2R5B|TWF1|RAPGEF2|TOX|BAIAP2|EHD1|STMN2|CYFIP1|CRTC1|NCKIPSD|AMIGO1|BHLHB9|NDEL1|DAB2IP|RETREG3	-2.3
GO Biological Processes	GO:0099173	postsynapse organization	-4.6	ACTB|ACTG1|APOE|CDH2|CTNND2|DLG4|DVL1|EPHB1|EPHB2|FYN|ITPKA|LRP4|SPTBN2|WASL|INA|NRXN1|NLGN3|NLGN4X|TMEM108|ARHGAP39|NTNG2|ZDHHC12|SHANK3	-2.2
GO Biological Processes	GO:0009896	positive regulation of catabolic process	-4.6	ABCA2|ADRA2A|AKT2|SLC25A5|APOE|BNIP3|ZFP36L1|PTTG1IP|CSNK1E|DCN|DDB1|DVL1|MTOR|GSK3B|HTT|HIF1A|HSF1|LRP1|MSN|NFE2L2|CNOT3|OAZ1|PAFAH1B2|PRKCD|SGTA|SUMO2|SOX9|STK11|TSC2|UVRAG|EZR|ZFP36|LAPTM5|RAB7A|BAG6|AXIN1|PIP4K2B|ULK1|BAG3|GTPBP1|PUM1|ULK2|KEAP1|AREL1|HUWE1|TOB1|TRIB1|ARIH2|ZER1|WWP1|SIRT2|TNRC6B|ATG2A|SH3BP4|RHBDD3|GPSM1|ZBTB20|PABPC1|AGO2|NOP53|SH3GLB1|WAC|DACT1|FZR1|RNF31|SAMD4B|EIF4ENIF1|…	-2.2
GO Biological Processes	GO:0098609	cell-cell adhesion	-4.6	ACTB|ACTG1|AQP4|ASTN1|ATP1B2|ZFP36L1|BSG|CDH2|CDH4|CDH5|CTNNA2|CTNND2|DLG4|DSCAM|CELSR2|GCNT1|GNAS|ITGA6|JUP|KIT|MSN|MYH9|NEO1|PPP1CA|PTPRM|PTPRS|NECTIN1|SELPLG|SOX9|SRF|STXBP1|TGFBR2|THY1|TJP1|EZR|WNT7B|PKP4|PLPP3|NRXN3|NRXN1|CLSTN3|TNIP1|BAIAP2|PDLIM5|ADGRL1|CLSTN1|METAP1|ASTN2|ADGRL3|PIP5K1C|CYFIP2|CTNNA3|LEF1|NLGN3|ROBO4|PCDHGC4|TENM2|DSCAML1|AMIGO1|NLGN4X|CAMSAP3|CADM3|CDH24|LRFN3|FAT4|TMEM4…	-2.2
GO Biological Processes	GO:0099072	regulation of postsynaptic membrane neurotransmitter receptor levels	-4.5	AP2A1|AP2A2|AP2M1|DLG4|FLOT2|ARHGAP44|CACNG3|CACNG2|CPLX1|CLSTN1|NSG1|CALY|CACNG7|STX1B|SHISA6	-2.2
GO Biological Processes	GO:0007269	neurotransmitter secretion	-4.5	DVL1|SEPTIN5|PTPRN2|RAB3A|STX1A|STXBP1|SYN1|PPFIA3|NAPA|SYT7|NRXN1|RIMS2|SNPH|CPLX2|CPLX1|HRH3|RPH3A|PIP5K1C|DNAJC5|BRSK1|STX1B	-2.2
GO Biological Processes	GO:0099643	signal release from synapse	-4.5	DVL1|SEPTIN5|PTPRN2|RAB3A|STX1A|STXBP1|SYN1|PPFIA3|NAPA|SYT7|NRXN1|RIMS2|SNPH|CPLX2|CPLX1|HRH3|RPH3A|PIP5K1C|DNAJC5|BRSK1|STX1B	-2.2
GO Biological Processes	GO:0034329	cell junction assembly	-4.5	ACHE|ACTB|ACTG1|ANK2|RHOA|RHOC|BCR|CDH2|CDH5|CTNND2|DSCAM|DVL1|EPHB2|GABRB2|GPM6A|NRG1|ITGA6|JUP|LRP4|MECP2|PLEC|SPTBN2|SRF|THY1|TJP1|UGT8|PKP4|BSN|NRXN1|CLSTN3|WDR1|CORO2B|PLXND1|ADGRL3|PIP5K1C|NLGN3|NLGN4X|CDH24|ZNF703|KIRREL3|NTNG2|ZDHHC12|SHANK3|SLITRK1|HIPK1|SDK1	-2.2
GO Biological Processes	GO:0035418	protein localization to synapse	-4.5	DLG4|KIF5C|MAP1A|BSN|NRXN1|ARHGAP44|CACNG3|CACNG2|BAIAP2|CPLX1|CLSTN1|NSG1|CACNG7|ZDHHC12|STX1B|LRRTM1	-2.2
GO Biological Processes	GO:2000463	positive regulation of excitatory postsynaptic potential	-4.5	DLG4|DVL1|GRIN1|GRIN2B|PRKCZ|STX1A|NRXN1|RIMS2|BAIAP2|NLGN3|SHANK3|STX1B	-2.1
GO Biological Processes	GO:0030029	actin filament-based process	-4.5	ABL1|ACTB|ACTG1|ADD1|ADRA2A|ANK2|SHROOM2|RHOA|RHOC|RHOG|BCL6|BCR|CAPZB|CFL1|S1PR1|EPB41L1|FLII|ARHGAP35|ITPKA|KCNH2|KIT|LIMK1|MARCKS|MEF2A|MYH6|MYH9|NEDD9|NF2|PAK1|PFN1|PLEC|PRKAR1A|TWF1|SPTAN1|SPTBN1|SPTBN2|SRF|TJP1|TPM2|TPM3|EZR|ZYX|NCK2|PDLIM4|CACNA1G|WASL|BRSK2|INA|PDLIM7|S1PR2|BCAR1|CDC42BPB|MTSS1|ARHGEF11|ARHGEF17|ELMO1|IQSEC1|WDR1|ARPC2|SORBS3|CORO2B|BAIAP2|NEBL|PDLIM5|IQGAP2|TRIOBP|IQSEC2…	-2.1
GO Biological Processes	GO:0007611	learning or memory	-4.4	ABL1|ADCY1|AGT|APOE|CHRNB2|BRINP1|DLG4|EPHB2|FYN|GABRA5|GM2A|GPI|GRIN1|GRIN2B|HTT|HIF1A|KCNK2|KIT|MAP1A|MECP2|NEUROD2|NRGN|NTSR1|SERPINF1|PRKCG|PRKCZ|RASGRF1|SLC6A1|SRF|B4GALT2|NRXN3|NRXN1|C1QL1|EHMT2|CIC|SYT11|CRTC1|GIT1|NLGN3|PAK6|JPH3|NLGN4X|BHLHB9|BRSK1|TTBK1|PPP1R9B|SHANK3|LRRN4	-2.1
GO Biological Processes	GO:0051493	regulation of cytoskeleton organization	-4.4	ABL1|ACTG1|ADD1|RHOA|RHOC|RHOG|CAPZB|CDH5|CSF1R|CTNNA2|DCTN1|DYNC1H1|S1PR1|LPAR1|MARK2|FLII|MTOR|ARHGAP35|GSK3B|LIMK1|LRP1|MAP1A|MAP6|MECP2|MID1|NF2|NOTCH2|NPM1|NUMA1|PAK1|PFN1|PRKCD|TWF1|RNF4|SDC4|SPTAN1|SPTBN1|SPTBN2|TJP1|NCK2|PPFIA1|WASL|MTSS1|ARHGAP44|WDR1|ARPC2|SORBS3|TUBB4A|CORO2B|BAIAP2|IQGAP2|MAPRE2|STMN2|TRIOBP|SYNPO|CYFIP1|CLASP1|COTL1|CDC42EP4|NUP62|ARFIP2|EML2|CLIC4|CLIP3|CYFIP2|CHMP2…	-2.1
GO Biological Processes	GO:0043409	negative regulation of MAPK cascade	-4.4	ABL1|AGT|APOE|BMP4|DAG1|DUSP1|DUSP6|DUSP7|DUSP8|EPHB2|FBLN1|GPS2|PRMT1|LYN|MEN1|NF2|PER1|PIK3R2|PRKCD|SMPD1|TIMP3|EZR|NCOR1|TNIP1|NUP62|DACT1|ERRFI1|ASH1L|NDRG2|PINK1|WNK2|SIRPA|DAB2IP	-2.1
GO Biological Processes	GO:0071625	vocalization behavior	-4.4	BRINP1|DLG4|NRXN3|NRXN1|NLGN3|NLGN4X|MYH14|SHANK3	-2.1
GO Biological Processes	GO:0010720	positive regulation of cell development	-4.4	ABL1|ADD1|BMP4|CAMK2B|CDH4|CDH5|CUX1|DAG1|ACE|DSCAM|MEGF8|EPHB2|MTOR|GDI1|HIF1A|IL6ST|ITPKA|KIT|LIMK1|LYN|MAP6|NEDD9|SERPINF1|PLXNA1|PPP1CC|SOX11|SRF|STK11|TGFB1|TGM2|PDE5A|MAP3K13|S1PR2|ARPC2|TRIB1|BAIAP2|TRIOBP|SIRT2|PLXND1|CYFIP1|SS18L1|SOX8|CDKL3|AMIGO1|PREX1|ZNF335|BHLHB9|NDEL1|TTBK1|SHANK3|MYADM|SLITRK1	-2.1
GO Biological Processes	GO:0110053	regulation of actin filament organization	-4.3	ABL1|ACTG1|ADD1|RHOA|RHOC|CAPZB|CTNNA2|S1PR1|LPAR1|FLII|MTOR|ARHGAP35|LIMK1|NF2|PAK1|PFN1|PRKCD|TWF1|SDC4|SPTAN1|SPTBN1|SPTBN2|TJP1|NCK2|PPFIA1|WASL|MTSS1|WDR1|ARPC2|SORBS3|CORO2B|BAIAP2|TRIOBP|SYNPO|CYFIP1|CLASP1|COTL1|CDC42EP4|ARFIP2|CYFIP2|RGCC|PDXP|CORO1B|MLST8|SHANK3|SSH2|MYADM|RHPN1	-2
GO Biological Processes	GO:0043010	camera-type eye development	-4.3	ACHE|SHROOM2|ATF4|ATP2B2|BMP4|COL8A1|DSCAM|EPHB1|EPHB2|EFEMP1|GNB1|GPM6A|ARHGAP35|HIF1A|HPCA|LAMB2|MAF|MAX|MITF|NF2|NOTCH2|SERPINF1|PTPRM|NECTIN1|RARA|SKI|SLC6A3|SMARCA4|SOX9|SOX11|SRF|TGFBR2|THY1|VIM|WNT7B|LHX2|MFN2|CITED2|KERA|FKBP8|CLIC4|B9D1|HIPK2|SOX8|FZR1|SLC17A7|BCL11B|DTNBP1|HIPK1|SDK1	-2
GO Biological Processes	GO:0031113	regulation of microtubule polymerization	-4.2	ABL1|CDH5|DCTN1|MECP2|NUMA1|PAK1|TUBB4A|STMN2|CLASP1|EML2|CLIP3|GIT1|SLAIN2|CAMSAP3|PRUNE1|CAMSAP1	-2
GO Biological Processes	GO:0007411	axon guidance	-4.1	RHOG|BSG|CDH4|CRMP1|CSF1R|DAG1|DPYSL2|DSCAM|DVL1|EPHB1|EPHB2|ETV1|FYN|ARHGAP35|ANOS1|KIF5C|LAMB2|NCAM1|NEO1|NFIB|NGFR|NOTCH2|NOTCH3|PLXNA1|PTPRM|NECTIN1|SLIT3|TRIO|CDK5R2|LHX2|NRXN3|NRXN1|TUBB3|SEMA6B|SEMA3C|PLXND1|CYFIP1|ROBO4|DSCAML1|BCL11B|UNC5A|ARHGEF25|VSTM2L	-1.9
GO Biological Processes	GO:0050767	regulation of neurogenesis	-4.1	CAMK2B|CDH4|CUX1|DAG1|BRINP1|ACE|DSCAM|MEGF8|EPHB2|MTOR|GDI1|HIF1A|IL6ST|ITPKA|KIT|LIMK1|LRP4|LYN|MAP6|NF2|SERPINF1|PLXNA1|PPP1CC|PPP3CA|PTPRS|SKI|SOX11|SRF|STK11|TGFB1|TGM2|THY1|YWHAH|ULK1|MAP3K13|LHX2|NR1D1|RAPGEF2|ULK2|BAIAP2|SEMA6B|SEMA3C|SIRT2|PLXND1|CYFIP1|SS18L1|SOX8|LEF1|CDKL3|DLL4|APPL2|AMIGO1|PRUNE1|ZNF335|GORASP1|TRIM46|BHLHB9|NDEL1|TTBK1|SHANK3|SLITRK1	-1.9
GO Biological Processes	GO:0031345	negative regulation of cell projection organization	-4.1	APOE|RHOA|CAPZB|CRMP1|LPAR1|EPHB2|FYN|GAK|GDI1|GRIN2B|LRP4|PPP3CA|PRKCD|PTPRS|SPOCK1|NR2F1|THY1|VIM|YWHAH|ULK1|RAPGEF2|ULK2|ARHGAP44|CARM1|SEMA6B|SEMA3C|STMN2|NGEF|CDKL3|BCL11A|RGMA|GORASP1|TRIM46|DTNBP1|STX1B|EVI5L|RAB3IP	-1.8
GO Biological Processes	GO:0099504	synaptic vesicle cycle	-4.1	ACTB|ACTG1|AP2M1|DNM1|GAK|SEPTIN5|RAB3A|SH3GL1|SNCB|STX1A|STXBP1|SYN1|PPFIA3|NAPA|SYT7|RIMS2|SNPH|SNAP91|CPLX2|CPLX1|PIP5K1C|NLGN3|SLC17A7|NLGN4X|DNAJC5|BRSK1|STX1B	-1.8
GO Biological Processes	GO:0097485	neuron projection guidance	-4.1	RHOG|BSG|CDH4|CRMP1|CSF1R|DAG1|DPYSL2|DSCAM|DVL1|EPHB1|EPHB2|ETV1|FYN|ARHGAP35|ANOS1|KIF5C|LAMB2|NCAM1|NEO1|NFIB|NGFR|NOTCH2|NOTCH3|PLXNA1|PTPRM|NECTIN1|SLIT3|TRIO|CDK5R2|LHX2|NRXN3|NRXN1|TUBB3|SEMA6B|SEMA3C|PLXND1|CYFIP1|ROBO4|DSCAML1|BCL11B|UNC5A|ARHGEF25|VSTM2L	-1.8
GO Biological Processes	GO:0051962	positive regulation of nervous system development	-4	ADGRB1|CAMK2B|CDH4|CUX1|DAG1|ACE|DSCAM|MEGF8|EPHB1|EPHB2|MTOR|GDI1|HIF1A|IL6ST|ITPKA|KIT|LIMK1|LYN|MAP6|SERPINF1|PLXNA1|PPP1CC|SOX11|SRF|STK11|TGFB1|TGM2|MAP3K13|NRXN1|CLSTN3|BAIAP2|CLSTN1|PLXND1|CYFIP1|SS18L1|SOX8|CDKL3|NLGN3|AMIGO1|LRRN1|ZNF335|BHLHB9|NDEL1|TTBK1|SHANK3|LRRC4B|SLITRK1|LRRTM1|LRRC24	-1.8
GO Biological Processes	GO:0002089	lens morphogenesis in camera-type eye	-4	SHROOM2|ATF4|BMP4|NECTIN1|SKI|SOX11|CITED2|HIPK2|HIPK1	-1.8
GO Biological Processes	GO:0016358	dendrite development	-4	CAMK2A|CTNNA2|CTNND2|DLG4|DSCAM|DVL1|CELSR2|EPHB1|EPHB2|FYN|GPR37|LRP4|MAP1A|MAP6|MECP2|MEF2A|NCK2|WASL|IQSEC1|BAIAP2|SS18L1|MAP1S|DTNBP1|PPP1R9B|SHANK3	-1.8
GO Biological Processes	GO:0051703	biological process involved in intraspecies interaction between organisms	-4	CHRNB2|BRINP1|DLG4|DVL1|GRID1|MECP2|SEPTIN5|NRXN3|NRXN1|CIC|NLGN3|NLGN4X|RPTOR|CHD8|SHANK3	-1.8
GO Biological Processes	GO:0035176	social behavior	-4	CHRNB2|BRINP1|DLG4|DVL1|GRID1|MECP2|SEPTIN5|NRXN3|NRXN1|CIC|NLGN3|NLGN4X|RPTOR|CHD8|SHANK3	-1.8
GO Biological Processes	GO:0006836	neurotransmitter transport	-4	DVL1|SEPTIN5|PTPRN2|RAB3A|SLC1A2|SLC6A1|SLC6A3|SLC6A9|STX1A|STXBP1|SYN1|PPFIA3|NAPA|SYT7|SYNGR3|NRXN1|RIMS2|SNPH|CPLX2|CPLX1|HRH3|RPH3A|PIP5K1C|SLC17A7|DNAJC5|BRSK1|STX1B|SLC6A17	-1.8
GO Biological Processes	GO:0032922	circadian regulation of gene expression	-4	ZFHX3|ATF4|CSNK1E|EGR1|NGFR|NPAS2|PER1|PML|PPP1CA|PPP1CC|MTA1|MAGED1|NR1D1|HUWE1|NCOA2|MYBBP1A|RAI1|PPARGC1A|CAVIN3	-1.8
GO Biological Processes	GO:0150063	visual system development	-3.9	ACHE|SHROOM2|ATF4|ATP2B2|BMP4|C3|COL8A1|DSCAM|EPHB1|EPHB2|EFEMP1|GNB1|GPM6A|ARHGAP35|HIF1A|HPCA|LAMB2|MAF|MAX|MITF|NF2|NOTCH2|SERPINF1|PTPRM|NECTIN1|RARA|SKI|SLC6A3|SMARCA4|SOX9|SOX11|SRF|TGFBR2|THY1|VIM|WNT7B|LHX2|MFN2|CITED2|KERA|SIPA1L3|FKBP8|CLIC4|B9D1|HIPK2|SOX8|FZR1|SMG9|SLC17A7|BCL11B|DTNBP1|ZDHHC16|HIPK1|SDK1|BLOC1S3	-1.7
GO Biological Processes	GO:0097104	postsynaptic membrane assembly	-3.9	CDH2|EPHB2|LRP4|NRXN1|NLGN3|NLGN4X	-1.7
GO Biological Processes	GO:0045661	regulation of myoblast differentiation	-3.9	ACTB|BMP4|ZFP36L1|FLOT2|MAP3K5|PPARD|SMARCA2|SMARCA4|SMARCC2|SOX9|TGFB1|ARID1A|SOX8|LRRC8A|ARID1B|ARID2	-1.7
GO Biological Processes	GO:0031333	negative regulation of protein-containing complex assembly	-3.9	ADD1|CAPZB|CDH5|FLII|GSK3B|HSF1|PFN1|PRKCD|PRKCZ|TWF1|SOX9|SPTAN1|SPTBN1|SPTBN2|STXBP1|ULK1|TUBB4A|STMN2|TRIOBP|SIRT2|EML2|CLIP3|NOP53|DACT1|PMEPA1|CTNNBIP1|SSH2|MYADM	-1.7
GO Biological Processes	GO:0051490	negative regulation of filopodium assembly	-3.8	CAPZB|PRKCD|ARHGAP44|RAB3IP	-1.6
GO Biological Processes	GO:1905232	cellular response to L-glutamate	-3.8	FYN|BAIAP2|BCL11A|AMIGO1	-1.6
GO Biological Processes	GO:0001654	eye development	-3.8	ACHE|SHROOM2|ATF4|ATP2B2|BMP4|COL8A1|DSCAM|EPHB1|EPHB2|EFEMP1|GNB1|GPM6A|ARHGAP35|HIF1A|HPCA|LAMB2|MAF|MAX|MITF|NF2|NOTCH2|SERPINF1|PTPRM|NECTIN1|RARA|SKI|SLC6A3|SMARCA4|SOX9|SOX11|SRF|TGFBR2|THY1|VIM|WNT7B|LHX2|MFN2|CITED2|KERA|SIPA1L3|FKBP8|CLIC4|B9D1|HIPK2|SOX8|FZR1|SMG9|SLC17A7|BCL11B|DTNBP1|ZDHHC16|HIPK1|SDK1|BLOC1S3	-1.6
GO Biological Processes	GO:0097120	receptor localization to synapse	-3.8	DLG4|KIF5C|ARHGAP44|CACNG3|CACNG2|CPLX1|CLSTN1|NSG1|ANKS1B|KIF17|CACNG7|STX1B|SHISA6	-1.6
GO Biological Processes	GO:0010596	negative regulation of endothelial cell migration	-3.8	APOE|RHOA|ADGRB1|CSNK2B|DCN|JUP|MECP2|SERPINF1|PTPRM|NR2F2|TGFB1|RGCC|ANGPT4|DLL4|DAB2IP	-1.6
GO Biological Processes	GO:0051098	regulation of binding	-3.7	ABL1|ACTB|ADD1|TLE5|APOE|BCL3|BMP4|CALM1|CDKN1A|CRMP1|CSNK1E|CSNK2B|ACE|DVL1|MARK2|GOLGA2|GSK3B|HSF1|LOX|LRP1|MEN1|NFKBIA|PPP1CA|PPP3CA|PRKCD|RARA|SKI|SUMO3|SOX11|TCF7L2|TMBIM6|TGFB1|EIF3C|EIF3D|MBD2|LHX2|RAPGEF2|CARM1|HABP4|SIRT2|PLXND1|LDOC1|BAMBI|SIN3A|GPSM1|HIPK2|LEF1|DACT1|RNF220|RGMA|CTNNBIP1|ZNF462|EBF2|ILRUN|HMBOX1|DTNBP1|TTBK1	-1.6
GO Biological Processes	GO:0050806	positive regulation of synaptic transmission	-3.7	ADCY1|CA2|DLG4|EPHB2|GRIN1|GRIN2B|MECP2|NRGN|PRKCG|PRKCZ|STX1A|STXBP1|NRXN1|RIMS2|CLSTN3|CACNG3|CACNG2|CLSTN1|CRTC1|NLGN3|CACNG7|PINK1|DTNBP1|ZDHHC12|SHANK3|STX1B|LRRTM1	-1.6
GO Biological Processes	GO:0048880	sensory system development	-3.7	ACHE|SHROOM2|ATF4|ATP2B2|BMP4|C3|COL8A1|DSCAM|EPHB1|EPHB2|EFEMP1|GNB1|GPM6A|ARHGAP35|HIF1A|HPCA|LAMB2|MAF|MAX|MITF|NF2|NOTCH2|SERPINF1|PTPRM|NECTIN1|RARA|SKI|SLC6A3|SMARCA4|SOX9|SOX11|SRF|TGFBR2|THY1|VIM|WNT7B|LHX2|MFN2|CITED2|KERA|SIPA1L3|FKBP8|CLIC4|B9D1|HIPK2|SOX8|FZR1|SMG9|SLC17A7|BCL11B|DTNBP1|ZDHHC16|HIPK1|SDK1|BLOC1S3	-1.6
GO Biological Processes	GO:0048814	regulation of dendrite morphogenesis	-3.7	CAMK2B|CHRNB2|CUX1|EPHB2|GSK3B|ITPKA|PPP3CA|STK11|YWHAH|RAPGEF2|BAIAP2|NSMF|SS18L1|CDKL3|GORASP1|BHLHB9|KNDC1	-1.6
GO Biological Processes	GO:0032535	regulation of cellular component size	-3.7	ABL1|ADD1|APOE|AQP4|RHOA|CAPZB|CDH4|AP2M1|DPYSL2|DSCAM|E2F4|MEGF8|FLII|MTOR|GDI1|ARHGAP35|GSK3B|LIMK1|MSN|PFN1|PPP1CA|PRKCD|TWF1|PTPRS|SPTAN1|SPTBN1|SPTBN2|SRF|EZR|WNT7B|ULK1|NCK2|MAP3K13|ULK2|WDR1|ARPC2|BAIAP2|SEMA6B|SEMA3C|TRIOBP|CYFIP1|ATP13A2|COTL1|CDC42EP4|PPP1R15A|SIN3A|CYFIP2|CDKL3|LRRC8A|PDXP|RPTOR|MLST8|TRIM46|NDEL1|SHANK3|SSH2|MYADM|TMEM123	-1.5
GO Biological Processes	GO:0001941	postsynaptic membrane organization	-3.7	APOE|CDH2|DLG4|DVL1|EPHB2|LRP4|NRXN1|NLGN3|NLGN4X|SHANK3	-1.5
GO Biological Processes	GO:0061001	regulation of dendritic spine morphogenesis	-3.6	KIF1A|CAMK2B|CFL1|EPHB2|ITPKA|LZTS3|ARHGAP44|BAIAP2|PDLIM5|NGEF|BHLHB9|DTNBP1|SHANK3	-1.5
GO Biological Processes	GO:0001505	regulation of neurotransmitter levels	-3.6	ACHE|ADCY1|ADRA2A|APBA1|DAGLA|CAMK2A|DVL1|GSK3B|SEPTIN5|PRKCG|PTPRN2|RAB3A|SLC1A2|SLC6A1|SLC6A3|STX1A|STXBP1|SYN1|PPFIA3|NAPA|SYT7|SYNGR3|NRXN1|RIMS2|SNPH|CPLX2|CPLX1|HRH3|RPH3A|SYT11|PIP5K1C|PNKD|GIT1|ZNF219|DNAJC5|DTNBP1|BRSK1|STX1B	-1.5
GO Biological Processes	GO:0050770	regulation of axonogenesis	-3.5	CDH2|CDH4|DSCAM|MEGF8|MARK2|EPHB2|GDI1|ARHGAP35|GSK3B|LIMK1|LRP4|MAP6|PAK1|PLXNA1|PTPRS|SRF|STK11|THY1|ULK1|BRSK2|MAP3K13|ULK2|SEMA6B|SEMA3C|PLXND1|CYFIP1|CDKL3|AMIGO1|TRIM46|NDEL1|BRSK1|SLITRK1	-1.4
GO Biological Processes	GO:1990778	protein localization to cell periphery	-3.5	AKT2|ANK1|ANK2|ATP6AP1|BBS1|BSG|CDH2|DLG4|DPP6|FLOT2|GAK|GAS6|JUP|PRKCZ|RAB3A|SPTBN1|STXBP1|EZR|RAB7A|RAPGEF2|ARHGAP44|CACNG3|CACNG2|CPLX1|EHD1|CLSTN1|GORASP2|NSG1|KCNIP3|EHD3|PACS1|GPR158|RAB40C|CACNG7|GORASP1|PPP1R9B|SYS1|MYADM|STX1B|TTC7B	-1.4
GO Biological Processes	GO:0106027	neuron projection organization	-3.5	ATP1A3|CTNND2|DCTN1|DLG4|DVL1|EPHB1|EPHB2|FYN|GSK3B|ITPKA|MAP1A|WASL|SHANK3	-1.4
GO Biological Processes	GO:0031334	positive regulation of protein-containing complex assembly	-3.5	ABCA3|RHOA|RHOC|CD36|CDH5|DCTN1|MTOR|GSK3B|NRG1|MECP2|MSN|NUMA1|PAK1|PFN1|PPP2R5B|TGFB1|WARS1|NCK2|ARPC2|BAIAP2|CLASP1|CDC42EP4|GIT1|CALY|SH3GLB1|TPPP3|DHX33|SLAIN2|MLST8|PINK1|ATAT1|TTBK1|DAB2IP	-1.4
GO Biological Processes	GO:1990138	neuron projection extension	-3.5	DVL1|LAMB2|PLXNA1|PRKCZ|SLIT3|STK11|ULK1|LHX2|ULK2|CYFIP1|CYFIP2|CDKL3|NRN1|NLGN3|PAK6|TMEM108|NDEL1	-1.4
GO Biological Processes	GO:0060433	bronchus development	-3.5	BMP4|SOX9|SRF|TGFBR2|WNT7B	-1.4
GO Biological Processes	GO:0007182	common-partner SMAD protein phosphorylation	-3.5	BMP4|PML|SPTBN1|TGFB1|TGFBR2	-1.4
GO Biological Processes	GO:0031110	regulation of microtubule polymerization or depolymerization	-3.5	ABL1|CDH5|DCTN1|MAP1A|MECP2|MID1|NUMA1|PAK1|TUBB4A|MAPRE2|STMN2|CLASP1|EML2|CLIP3|GIT1|MAP1S|SLAIN2|CAMSAP3|PRUNE1|CAMSAP1	-1.4
GO Biological Processes	GO:0007163	establishment or maintenance of cell polarity	-3.5	ACTB|ANK1|RHOA|RHOC|RHOG|DCTN1|DLG4|MARK2|EPHB1|ARHGAP35|GSK3B|HTT|MSN|MYH9|NUMA1|PRKCZ|STK11|WNT7B|GBF1|BRSK2|LHX2|CDC42BPB|ARHGEF11|WDR1|RAB11FIP2|SIPA1L3|FRMD4B|CLASP1|CLIC4|AMOTL2|FRMD4A|CAMSAP3|NDEL1|BRSK1|PARD3B|MYO18A	-1.4
GO Biological Processes	GO:0018107	peptidyl-threonine phosphorylation	-3.5	GRK2|CAMK2A|CSNK2B|MARK2|MTOR|GSK3B|MAP3K10|PRKCD|STK11|TGFBR2|ULK1|DYRK1B|CDC42BPB|HIPK2|WNK1|TTBK1|HIPK1|SBK1	-1.4
GO Biological Processes	GO:0072657	protein localization to membrane	-3.4	AKT2|ANK1|ANK2|APOE|ATP6AP1|BBS1|BSG|CDH2|DLG4|DPP6|DVL1|FLOT2|GAK|GAS6|JUP|LRP4|PRKCZ|RAB3A|SGTA|SPTBN1|SRP14|STX1A|STXBP1|THY1|EZR|RAB7A|BAG6|HGS|NRXN1|RAPGEF2|TM9SF4|ARHGAP44|CACNG3|CACNG2|CPLX1|CYP46A1|EHD1|CLSTN1|TRAM1|GORASP2|NSG1|KCNIP3|EHD3|SH3GLB1|REEP2|GET4|PACS1|EMC3|ATP13A1|GPR158|RAB40C|CACNG7|GORASP1|ZDHHC14|ABHD17A|ZDHHC18|ZDHHC12|SHANK3|SYS1|TIMM29|MYADM|STX1B|RAB3IP|TTC7B|VPS37D|…	-1.4
GO Biological Processes	GO:0050654	chondroitin sulfate proteoglycan metabolic process	-3.4	BGN|DCN|IDUA|B3GAT3|B3GAT1|CHST11|CHST12|CHST7|XYLT2|CHPF|CHST13	-1.4
GO Biological Processes	GO:0099590	neurotransmitter receptor internalization	-3.4	AP2A1|AP2A2|AP2M1|CACNG3|CACNG2|CALY|CACNG7	-1.3
GO Biological Processes	GO:1902904	negative regulation of supramolecular fiber organization	-3.4	ADD1|APOE|CAPZB|CDH5|CTNNA2|S1PR1|FLII|MID1|PFN1|PRKCD|TWF1|SPTAN1|SPTBN1|SPTBN2|TJP1|PPFIA1|TUBB4A|CORO2B|STMN2|TRIOBP|CLASP1|EML2|CLIP3|CORO1B|CAMSAP3|SHANK3|SSH2|MYADM|RHPN1|CAMSAP1	-1.3
GO Biological Processes	GO:0051494	negative regulation of cytoskeleton organization	-3.4	ADD1|CAPZB|CDH5|CTNNA2|S1PR1|FLII|MID1|NPM1|PFN1|PRKCD|TWF1|SPTAN1|SPTBN1|SPTBN2|TJP1|PPFIA1|TUBB4A|CORO2B|STMN2|TRIOBP|CLASP1|EML2|CLIP3|CORO1B|CAMSAP3|SHANK3|SSH2|MYADM|RHPN1|CAMSAP1	-1.3
GO Biological Processes	GO:0032956	regulation of actin cytoskeleton organization	-3.4	ABL1|ACTG1|ADD1|RHOA|RHOC|RHOG|CAPZB|CSF1R|CTNNA2|S1PR1|LPAR1|FLII|MTOR|ARHGAP35|LIMK1|LRP1|NF2|NOTCH2|PAK1|PFN1|PRKCD|TWF1|SDC4|SPTAN1|SPTBN1|SPTBN2|TJP1|NCK2|PPFIA1|WASL|MTSS1|ARHGAP44|WDR1|ARPC2|SORBS3|CORO2B|BAIAP2|IQGAP2|TRIOBP|SYNPO|CYFIP1|CLASP1|COTL1|CDC42EP4|ARFIP2|CYFIP2|RGCC|PDXP|CORO1B|MLST8|SHANK3|SSH2|MYADM|RHPN1	-1.3
GO Biological Processes	GO:0048660	regulation of smooth muscle cell proliferation	-3.3	AGT|APOD|APOE|RHOA|BMP4|CDKN1A|S1PR1|FGFR2|IRAK1|MEF2D|MAP3K5|MMP2|NOTCH3|NPPC|PPARD|TCF7L2|TGFB1|TGFBR2|S1PR2|MFN2|TRIB1|PPARGC1A|FOXP1|SMPD3|FOXJ2|CTNNBIP1|NDRG2	-1.3
GO Biological Processes	GO:0070059	intrinsic apoptotic signaling pathway in response to endoplasmic reticulum stress	-3.3	ATF4|ATP2A1|MAP3K5|PML|TMBIM6|BAG6|BRSK2|PPP1R15A|QRICH1|DAB2IP	-1.3
GO Biological Processes	GO:0060996	dendritic spine development	-3.3	CAMK2A|CTNND2|DLG4|DVL1|EPHB1|EPHB2|NCK2|WASL|IQSEC1|SHANK3	-1.3
GO Biological Processes	GO:0017157	regulation of exocytosis	-3.3	ADCY1|ADRA2A|APBA1|BCR|SEPTIN1|DVL1|GSK3B|LYN|SEPTIN5|PRKCG|RAB3A|SDC4|STX1A|STXBP1|SYN1|VSNL1|RAB7A|CACNA1G|CDK5R2|SYT7|HGS|RIMS2|GAB2|CPLX2|CPLX1|SYT11|CLASP1|ATP13A2|CHMP2A|GIT1|SYT17|SMPD3|DTNBP1|STX1B|SCAMP5|LGI3	-1.3
GO Biological Processes	GO:0042391	regulation of membrane potential	-3.3	ABL1|AKT2|ANK2|ATP1A3|ATP1B2|HCN2|BNIP3|BOK|CALM1|CD36|CHRM1|CHRNA4|CHRNB2|DCN|DLG4|DVL1|MTOR|GABRA3|GABRA5|GABRB2|GLRX|GRID1|GRIN1|GRIN2B|GSK3B|JUP|KCNH2|KCNK1|KCNK2|KCNQ3|MECP2|NTSR1|PPP3CA|PRKCZ|PYCR1|STX1A|YWHAH|KCNAB2|CACNA1G|S1PR2|NRXN1|AKAP6|RIMS2|WDR1|CACNG2|BAIAP2|TUSC2|CRTC1|CTNNA3|EHD3|NLGN3|KCNK12|CELF4|NLGN4X|PINK1|TMEM108|MYH14|SLC4A11|SHANK3|STX1B|SEZ6|RGS7BP	-1.2
GO Biological Processes	GO:0043618	regulation of transcription from RNA polymerase II promoter in response to stress	-3.3	ATF4|ATF6B|EGR1|EPAS1|HIF1A|HSF1|NFE2L2|TMBIM6|NCK2|BAG3|CITED2|SIRT2|SIN3A	-1.2
GO Biological Processes	GO:0032970	regulation of actin filament-based process	-3.3	ABL1|ACTG1|ADD1|ANK2|RHOA|RHOC|RHOG|ATP2A1|CAPZB|CSF1R|CTNNA2|S1PR1|LPAR1|FLII|MTOR|ARHGAP35|JUP|LIMK1|LRP1|MYH9|NF2|NOTCH2|PAK1|PFN1|PRKCD|TWF1|SDC4|SPTAN1|SPTBN1|SPTBN2|TJP1|NCK2|PPFIA1|WASL|MTSS1|ARHGAP44|WDR1|ARPC2|SORBS3|CORO2B|BAIAP2|IQGAP2|TRIOBP|SYNPO|CYFIP1|CLASP1|COTL1|CDC42EP4|ARFIP2|CYFIP2|RGCC|CTNNA3|PDXP|CORO1B|MLST8|SHANK3|SSH2|MYADM|RHPN1	-1.2
GO Biological Processes	GO:0099175	regulation of postsynapse organization	-3.3	APOE|KIF1A|CAMK2B|CDH2|CFL1|EPHB2|FYN|GRIN2B|ITPKA|LZTS3|ARHGAP44|BAIAP2|PDLIM5|NGEF|BHLHB9|ABHD17A|DTNBP1|SHANK3|LRRC4B	-1.2
GO Biological Processes	GO:1903539	protein localization to postsynaptic membrane	-3.3	DLG4|ARHGAP44|CACNG3|CACNG2|CPLX1|CLSTN1|NSG1|CACNG7|STX1B	-1.2
GO Biological Processes	GO:0032411	positive regulation of transporter activity	-3.2	ANK2|ATP1B2|ATP2A1|CALM1|EPHB2|GLRX|HTT|NTSR1|PPP3CA|PRKCD|STIM1|SYNGR3|AKAP6|CACNG3|CACNG2|EHD3|NLGN3|AMIGO1|STIM2|PINK1|WNK1|WNK2|SHANK3	-1.2
GO Biological Processes	GO:0042752	regulation of circadian rhythm	-3.2	ADCY1|ZFHX3|CHRNB2|CSNK1E|DDB1|NR2F6|MTOR|GSK3B|PER1|PML|PPP1CA|PPP1CC|PRKCG|PTGDS|MTA1|MAGED1|NR1D1|PPARGC1A|PHLPP1|CRTC1|SIN3A|CCAR2|FBXL17	-1.2
GO Biological Processes	GO:1902893	regulation of miRNA transcription	-3.2	BMP4|KLF5|EGR1|HIF1A|NFIB|NGFR|PPARD|RARA|SMARCA4|SOX9|SREBF2|SRF|TEAD1|TGFB1|MRTFA	-1.2
GO Biological Processes	GO:1902065	response to L-glutamate	-3.2	FYN|HPCA|TMBIM6|BAIAP2|BCL11A|AMIGO1	-1.2
GO Biological Processes	GO:0030010	establishment of cell polarity	-3.2	RHOA|DCTN1|MARK2|EPHB1|GSK3B|HTT|MSN|MYH9|NUMA1|PRKCZ|STK11|GBF1|BRSK2|ARHGEF11|RAB11FIP2|SIPA1L3|FRMD4B|CLASP1|AMOTL2|FRMD4A|CAMSAP3|NDEL1|BRSK1|PARD3B|MYO18A	-1.2
GO Biological Processes	GO:0045055	regulated exocytosis	-3.2	KIT|LYN|MYH9|SEPTIN5|PTGDS|RAB3A|STX1A|STXBP1|PPFIA3|NAPA|SYT7|SYNGR3|SYNGR2|SYNGR1|RIMS2|SNPH|CPLX2|CPLX1|RAB11FIP2|SYT11|PIP5K1C|SDF4|SYT17|DNAJC5|STX1B	-1.2
GO Biological Processes	GO:2001259	positive regulation of cation channel activity	-3.2	ANK2|CALM1|EPHB2|HTT|NTSR1|PPP3CA|STIM1|AKAP6|CACNG3|CACNG2|EHD3|NLGN3|AMIGO1|STIM2|PINK1|SHANK3	-1.2
GO Biological Processes	GO:0001678	cellular glucose homeostasis	-3.2	AQP4|ACE|GAS6|HIF1A|HK1|FOXK2|MEN1|NGFR|SERPINF1|PIK3R2|PPP3CA|PTPRN2|SRF|ZNF236|NR1D1|PPARGC1A|RAB11FIP2|SIN3A|ZBTB20|LRRC8A	-1.2
GO Biological Processes	GO:0071900	regulation of protein serine/threonine kinase activity	-3.2	ABL1|ACTB|ADRA2A|AGT|APOE|RHOA|BLM|BMP4|CALM1|CCND2|CCND3|CDKN1A|CDKN2D|CSF1R|DUSP1|DUSP7|DVL3|FGFR1|HTT|IGF2|IRAK1|KIT|LYN|MAP3K5|MEN1|MIF|MAP3K10|PAK1|PKIA|PRKAR1A|PRKCD|SMPD1|NR2F2|TGFB1|THY1|UVRAG|AXIN1|PDE5A|KSR1|CDK5R2|HGS|MAP3K13|MAGED1|RAPGEF2|DAZAP2|TRIB1|CCNI|NUP62|LATS2|RGCC|RPTOR|MLST8|DTNBP1|CCNYL1|DAB2IP	-1.1
GO Biological Processes	GO:0032272	negative regulation of protein polymerization	-3.2	ADD1|CAPZB|CDH5|FLII|PFN1|PRKCD|TWF1|SPTAN1|SPTBN1|SPTBN2|TUBB4A|STMN2|TRIOBP|EML2|CLIP3|SSH2|MYADM	-1.1
GO Biological Processes	GO:0010469	regulation of signaling receptor activity	-3.1	ADRA2A|DLG4|EPHB2|HIF1A|LY6E|LY6H|PPP2R5B|PRKCD|RASGRF1|SLC6A9|NCK2|DLGAP2|DLGAP1|CACNG3|CACNG2|DLGAP4|NPTXR|LDOC1|RWDD1|ERRFI1|NLGN3|DLGAP3|CACNG7|PINK1|LYNX1|SHANK3|SHISA6|SHISA9	-1.1
GO Biological Processes	GO:0071867	response to monoamine	-3.1	ABL1|ADCY5|APLP1|ATF4|CHRM1|GNAO1|GNAS|GNAZ|GNB1|GSK3B|HTR1D|PENK|TGM2|HRH3|SIRT2|SIN3A|NSG1|CALY	-1.1
GO Biological Processes	GO:0071869	response to catecholamine	-3.1	ABL1|ADCY5|APLP1|ATF4|CHRM1|GNAO1|GNAS|GNAZ|GNB1|GSK3B|HTR1D|PENK|TGM2|HRH3|SIRT2|SIN3A|NSG1|CALY	-1.1
GO Biological Processes	GO:0060534	trachea cartilage development	-3.1	RARA|SOX9|SRF|WNT7B	-1.1
GO Biological Processes	GO:0051388	positive regulation of neurotrophin TRK receptor signaling pathway	-3.1	PPP2R5B|CYFIP1|CYFIP2|TMEM108	-1.1
GO Biological Processes	GO:0032388	positive regulation of intracellular transport	-3.1	AKT2|ATP2A1|CHRM1|DYNC1H1|FYN|GAS6|GSK3B|HPCA|JUP|MSN|NUMA1|OAZ1|PCNT|PIK3R2|PRKCD|SREBF2|STK11|TCF7L2|TGFB1|EZR|BAP1|BAG3|TM9SF4|HUWE1|ARIH2|EHD1|MLC1|PTPN23|B3GAT3|CALY|SH3GLB1|MIEF1|RNF31|PINK1|TRIM46	-1.1
GO Biological Processes	GO:0010632	regulation of epithelial cell migration	-3.1	ABL1|AGT|APOE|RHOA|ARSB|ADGRB1|BMP4|SCARB1|CSNK2B|DCN|FGFR1|MTOR|GPI|GRN|HIF1A|JUP|MECP2|NFE2L2|ENPP2|SERPINF1|PFN1|PTPRM|SOX9|SPARC|NR2F2|TGFB1|TGFBR2|PLPP3|BCAR1|IQSEC1|MAPRE2|CLASP1|PTPN23|FOXP1|RGCC|ANGPT4|DLL4|DAB2IP|EMC10	-1.1
GO Biological Processes	GO:0010807	regulation of synaptic vesicle priming	-3.1	RAB3A|STX1A|STXBP1|NAPA|STX1B	-1.1
GO Biological Processes	GO:0007568	aging	-3.1	AGT|ALPL|APOD|SERPING1|CASP9|CAT|DAG1|ACE|GFRA1|IGFBP2|IRAK1|JUND|MMP2|ATP6|COX1|ND4|NFE2L2|SERPINF1|PENK|PPP3CA|RPN2|SLC1A2|SLC6A3|TGFBR2|MBD2|CARM1|SCAP|SIN3A|PPP1R9B	-1.1
GO Biological Processes	GO:0062237	protein localization to postsynapse	-3.1	DLG4|ARHGAP44|CACNG3|CACNG2|CPLX1|CLSTN1|NSG1|CACNG7|STX1B	-1.1
GO Biological Processes	GO:0030336	negative regulation of cell migration	-3.1	APOD|APOE|RHOA|ATP1B2|ADGRB1|BCR|COL3A1|CSNK2B|DAG1|DCN|DUSP1|ENG|NRG1|JUP|LRP1|MECP2|MIF|MITF|NF2|NFE2L2|NGFR|SERPINF1|PPARD|PTPRM|SRF|NR2F2|TGFB1|THY1|WASL|S1PR2|SRGAP3|TRIB1|CITED2|SIN3B|CLASP1|PTPN23|CLIC4|SIN3A|RGCC|ANGPT4|DLL4|CORO1B|SAP130|DAB2IP|ARID2	-1.1
GO Biological Processes	GO:0016239	positive regulation of macroautophagy	-3.1	SLC25A5|BNIP3|DCN|HTT|HIF1A|PAFAH1B2|TSC2|UVRAG|PIP4K2B|ULK1|BAG3|ATG2A|GPSM1|SH3GLB1|WAC|RNF31|PINK1	-1.1
GO Biological Processes	GO:0050769	positive regulation of neurogenesis	-3.1	CAMK2B|CDH4|CUX1|DAG1|ACE|DSCAM|MEGF8|EPHB2|MTOR|GDI1|HIF1A|IL6ST|ITPKA|KIT|LIMK1|LYN|MAP6|SERPINF1|PLXNA1|PPP1CC|SOX11|SRF|STK11|TGFB1|TGM2|MAP3K13|BAIAP2|PLXND1|CYFIP1|SS18L1|SOX8|CDKL3|AMIGO1|ZNF335|BHLHB9|NDEL1|TTBK1|SHANK3|SLITRK1	-1.1
GO Biological Processes	GO:0060560	developmental growth involved in morphogenesis	-3.1	ABL1|BMP4|DVL1|S1PR1|FGFR2|LAMB2|PLXNA1|PRKCZ|SLIT3|SOX9|STK11|TGFBR2|WNT7B|ULK1|LHX2|ULK2|CYFIP1|CYFIP2|CDKL3|NRN1|NLGN3|PAK6|TMEM108|NDEL1	-1.1
GO Biological Processes	GO:1903351	cellular response to dopamine	-3.1	ABL1|ADCY5|ATF4|CHRM1|GNAO1|GNAS|GNAZ|GNB1|GSK3B|HTR1D|TGM2|HRH3|SIN3A|NSG1|CALY	-1.1
GO Biological Processes	GO:0046928	regulation of neurotransmitter secretion	-3	ADCY1|ADRA2A|APBA1|CAMK2A|DVL1|GSK3B|SEPTIN5|PRKCG|RAB3A|STX1A|STXBP1|SYN1|CPLX2|CPLX1|SYT11|PNKD|GIT1|DTNBP1|STX1B	-1.1
GO Biological Processes	GO:0032414	positive regulation of ion transmembrane transporter activity	-3	ANK2|ATP1B2|ATP2A1|CALM1|EPHB2|GLRX|HTT|NTSR1|PPP3CA|STIM1|AKAP6|CACNG3|CACNG2|EHD3|NLGN3|AMIGO1|STIM2|PINK1|WNK1|WNK2|SHANK3	-1.1
GO Biological Processes	GO:0050650	chondroitin sulfate proteoglycan biosynthetic process	-3	B3GAT3|B3GAT1|CHST11|CHST12|CHST7|XYLT2|CHPF|CHST13	-1
GO Biological Processes	GO:0048857	neural nucleus development	-3	ACTB|RHOA|CALM1|CHRNB2|G6PD|NFIB|YWHAH|CDK5R2|INA|SYNGR3|SIRT2|NDRG2|KIRREL3|TTBK1	-1
GO Biological Processes	GO:1904064	positive regulation of cation transmembrane transport	-3	ABL1|AGT|ANK2|ATP1B2|ATP2A1|CALM1|EPHB2|G6PD|GLRX|GRIN1|HTT|KCNH2|NTSR1|PPP3CA|STIM1|THY1|AKAP6|CACNG3|CACNG2|EHD3|NLGN3|AMIGO1|STIM2|PINK1|WNK1|WNK2|SHANK3	-1
GO Biological Processes	GO:0036293	response to decreased oxygen levels	-3	RHOA|ATF4|BNIP3|ZFP36L1|CAT|CHRNA4|CHRNB2|CREBBP|ACE|EGR1|EPAS1|MTOR|HIF1A|HSF1|IRAK1|KCNK2|MECP2|MMP2|ND4|ND5|NFE2L2|NPPC|PENK|PML|PPARD|SRF|TGFBR2|LONP1|TM9SF4|CITED2|NDRG1|SIRT2|SCAP|TXN2|RGCC|HIPK2|NOP53|ANGPTL4|ANGPT4|MIEF1|AGTRAP|RPTOR|MLST8|PINK1|CPEB4	-1
GO Biological Processes	GO:1902905	positive regulation of supramolecular fiber organization	-3	ABL1|APOE|RHOA|RHOC|DCTN1|LPAR1|MTOR|LIMK1|MECP2|NF2|NUMA1|PAK1|PFN1|SDC4|NCK2|WASL|MTSS1|WDR1|ARPC2|SORBS3|BAIAP2|STMN2|SYNPO|CYFIP1|CLASP1|CDC42EP4|GIT1|RGCC|PDXP|SLAIN2|MLST8	-1
GO Biological Processes	GO:0070507	regulation of microtubule cytoskeleton organization	-3	ABL1|RHOA|CDH5|DCTN1|DYNC1H1|MARK2|GSK3B|MAP1A|MAP6|MECP2|MID1|NUMA1|PAK1|RNF4|TUBB4A|MAPRE2|STMN2|CLASP1|NUP62|EML2|CLIP3|CHMP2A|GIT1|MAP1S|SLAIN2|CAMSAP3|PRUNE1|ATAT1|CAMSAP1	-1
GO Biological Processes	GO:0032231	regulation of actin filament bundle assembly	-3	ABL1|ACTG1|RHOA|RHOC|S1PR1|LPAR1|MTOR|LIMK1|NF2|PAK1|PFN1|SDC4|TJP1|PPFIA1|MTSS1|SORBS3|CORO2B|SYNPO|CLASP1|RGCC|SHANK3|RHPN1	-1
GO Biological Processes	GO:0035304	regulation of protein dephosphorylation	-3	CALM1|CDH5|CSNK2B|MTOR|GSK3B|HTT|PPP2R5D|PRKCD|SMPD1|TGFB1|PPP6R2|NUAK1|PPP6R1|CAMTA1|PPP1R15A|NSMF|PINK1|PPP1R9B|TIPRL	-1
GO Biological Processes	GO:0060438	trachea development	-3	BMP4|RARA|SOX9|SRF|TGFBR2|WNT7B|LEF1	-1
GO Biological Processes	GO:0002088	lens development in camera-type eye	-3	SHROOM2|ATF4|BMP4|MAF|NF2|NECTIN1|SKI|SOX11|TGFBR2|VIM|WNT7B|CITED2|HIPK2|FZR1|HIPK1	-1
GO Biological Processes	GO:1903350	response to dopamine	-3	ABL1|ADCY5|ATF4|CHRM1|GNAO1|GNAS|GNAZ|GNB1|GSK3B|HTR1D|TGM2|HRH3|SIN3A|NSG1|CALY	-1
GO Biological Processes	GO:0042593	glucose homeostasis	-3	ADRA2A|AQP4|ACE|GAS6|GPI|HIF1A|HK1|FOXK2|MEN1|NGFR|PDK2|SERPINF1|PIK3R2|PPP3CA|PTPRN2|SLC16A1|SRF|STK11|TCF7L2|VGF|WFS1|ZNF236|NR1D1|PPARGC1A|RAB11FIP2|SIN3A|ZBTB20|APPL2|MBD5|LRRC8A|HECTD4	-1
GO Biological Processes	GO:0031644	regulation of nervous system process	-3	AGT|DAG1|DLG4|DVL1|GRIN1|GRIN2B|NTSR1|PRKCZ|STX1A|DLGAP2|DLGAP1|S1PR2|NRXN1|RIMS2|BAIAP2|DLGAP4|NPTXR|TNFRSF21|NLGN3|CELF4|NLGN4X|DLGAP3|TMEM108|SHANK3|STX1B|SHISA6|SHISA9	-1
GO Biological Processes	GO:2000819	regulation of nucleotide-excision repair	-2.9	ACTB|SMARCA2|SMARCA4|SMARCC2|ARID1A|CUL4A|BCL7B|ARID1B|ARID2	-1
GO Biological Processes	GO:0034331	cell junction maintenance	-2.9	CSF1R|DCTN1|DLG4|RAB3A|TJP1|BSN|MTSS1|C1QL1|ERC1|WHRN|SDF4|CAMSAP3	-1
GO Biological Processes	GO:0010633	negative regulation of epithelial cell migration	-2.9	APOE|RHOA|ADGRB1|CSNK2B|DCN|JUP|MECP2|SERPINF1|PTPRM|NR2F2|TGFB1|PTPN23|RGCC|ANGPT4|DLL4|DAB2IP	-1
GO Biological Processes	GO:0070482	response to oxygen levels	-2.9	RHOA|ATF4|ATP6AP1|BNIP3|ZFP36L1|CAT|CHRNA4|CHRNB2|CREBBP|ACE|EGR1|EPAS1|MTOR|HIF1A|HSF1|IRAK1|KCNK2|MECP2|MMP2|ATP6|ND4|ND5|NFE2L2|NPPC|PENK|PML|PPARD|SRF|TGFBR2|LONP1|TM9SF4|CITED2|NDRG1|SIRT2|SCAP|TXN2|RGCC|HIPK2|NOP53|ANGPTL4|ANGPT4|MIEF1|AGTRAP|RPTOR|MLST8|PINK1|CPEB4|CCDC115	-1
GO Biological Processes	GO:0001666	response to hypoxia	-2.9	RHOA|BNIP3|ZFP36L1|CAT|CHRNA4|CHRNB2|CREBBP|ACE|EGR1|EPAS1|MTOR|HIF1A|HSF1|IRAK1|KCNK2|MECP2|MMP2|ND4|ND5|NFE2L2|NPPC|PENK|PML|PPARD|SRF|TGFBR2|LONP1|TM9SF4|CITED2|NDRG1|SIRT2|SCAP|TXN2|RGCC|HIPK2|NOP53|ANGPTL4|ANGPT4|MIEF1|AGTRAP|RPTOR|MLST8|PINK1	-1
GO Biological Processes	GO:2000146	negative regulation of cell motility	-2.9	APOD|APOE|RHOA|ATP1B2|ADGRB1|BCR|COL3A1|CSNK2B|DAG1|DCN|DUSP1|ENG|FBLN1|NRG1|JUP|LRP1|MECP2|MIF|MITF|NF2|NFE2L2|NGFR|SERPINF1|PPARD|PTPRM|SRF|NR2F2|TGFB1|THY1|WASL|S1PR2|SRGAP3|TRIB1|CITED2|SIN3B|CLASP1|PTPN23|CLIC4|SIN3A|RGCC|ANGPT4|DLL4|CORO1B|SAP130|DAB2IP|ARID2	-1
GO Biological Processes	GO:0045216	cell-cell junction organization	-2.9	ACTB|ACTG1|ANK2|RHOA|RHOC|CDH2|CDH5|CSF1R|CTNND2|EPHB2|JUP|NF2|PLEC|NECTIN1|SRF|TGFB1|TJP1|UGT8|PKP4|MTSS1|WDR1|PIP5K1C|WHRN|NLGN4X|CAMSAP3|CDH24|ZNF703|CCM2|HIPK1|AJM1	-1
GO Biological Processes	GO:0051968	positive regulation of synaptic transmission, glutamatergic	-2.9	GRIN1|GRIN2B|STXBP1|NRXN1|CACNG3|CACNG2|NLGN3|CACNG7|DTNBP1|SHANK3	-0.99
GO Biological Processes	GO:0071868	cellular response to monoamine stimulus	-2.9	ABL1|ADCY5|APLP1|ATF4|CHRM1|GNAO1|GNAS|GNAZ|GNB1|GSK3B|HTR1D|TGM2|HRH3|SIRT2|SIN3A|NSG1|CALY	-0.99
GO Biological Processes	GO:0071870	cellular response to catecholamine stimulus	-2.9	ABL1|ADCY5|APLP1|ATF4|CHRM1|GNAO1|GNAS|GNAZ|GNB1|GSK3B|HTR1D|TGM2|HRH3|SIRT2|SIN3A|NSG1|CALY	-0.99
GO Biological Processes	GO:0016079	synaptic vesicle exocytosis	-2.9	SEPTIN5|RAB3A|STX1A|STXBP1|PPFIA3|NAPA|SYT7|RIMS2|SNPH|CPLX2|CPLX1|PIP5K1C|DNAJC5|STX1B	-0.99
GO Biological Processes	GO:0033500	carbohydrate homeostasis	-2.9	ADRA2A|AQP4|ACE|GAS6|GPI|HIF1A|HK1|FOXK2|MEN1|NGFR|PDK2|SERPINF1|PIK3R2|PPP3CA|PTPRN2|SLC16A1|SRF|STK11|TCF7L2|VGF|WFS1|ZNF236|NR1D1|PPARGC1A|RAB11FIP2|SIN3A|ZBTB20|APPL2|MBD5|LRRC8A|HECTD4	-0.98
GO Biological Processes	GO:0051100	negative regulation of binding	-2.9	ACTB|TLE5|CDKN1A|CRMP1|CSNK1E|ACE|DVL1|GOLGA2|GSK3B|NFKBIA|PPP1CA|PPP3CA|PRKCD|SUMO3|SOX11|TMBIM6|LHX2|HABP4|SIN3A|LEF1|DACT1|RGMA|CTNNBIP1|ZNF462|ILRUN|DTNBP1|TTBK1	-0.98
GO Biological Processes	GO:0090287	regulation of cellular response to growth factor stimulus	-2.9	ABL1|AGT|BMP4|CDH5|CREBBP|DCN|ENG|FGFR1|HIF1A|LOX|LTBP1|MEN1|NEO1|NGFR|NOTCH2|NUMA1|PCSK6|PPP2R5B|HTRA1|SKI|SOX11|STK11|TGFB1|AXIN1|HGS|TOB1|CITED2|EPN2|ZNF423|CYFIP1|FKBP8|BAMBI|SIN3A|LATS2|CYFIP2|HIPK2|CHST11|SULF2|PMEPA1|RGMA|FAM20C|UBE2O|TMEM108|SAP130|ZNF703|HTRA3|DAB2IP|BCL9L	-0.98
GO Biological Processes	GO:0051017	actin filament bundle assembly	-2.9	ADD1|RHOA|MARCKS|NEDD9|SRF|EZR|ZYX|BAIAP2|SPIRE1|PDXP|CORO1B|SPIRE2|FAM171A1	-0.95
GO Biological Processes	GO:0009416	response to light stimulus	-2.9	AKT2|ATF4|BCL3|CASP9|CAT|CDKN1A|CDKN2D|CHRNB2|CREBBP|DDB1|NR2F6|GRIN1|HIF1A|JUND|KIT|MECP2|MEN1|MMP2|NPM1|PER1|PML|PPP1CA|PPP1CC|PRKCD|SLC1A2|SMPD1|STK11|CUL4A|COPS3|B4GALT2|MTA1|PITPNM1|N4BP1|UBE4B|CRTC1|SDF4|TMEM161A|CCAR2|FBXL17|DYNLRB1|BRSK1|REEP6|LRRN4	-0.94
GO Biological Processes	GO:1904385	cellular response to angiotensin	-2.9	AGT|CA2|CAMK2A|HSF1|NFE2L2|PRKCD|AHCYL1|AGTRAP	-0.94
GO Biological Processes	GO:0060235	lens induction in camera-type eye	-2.8	BMP4|HIPK2|HIPK1	-0.94
GO Biological Processes	GO:0048144	fibroblast proliferation	-2.8	AGT|COL3A1|WNT7B	-0.94
GO Biological Processes	GO:1905857	positive regulation of pentose-phosphate shunt	-2.8	MTOR|RPTOR|MLST8	-0.94
GO Biological Processes	GO:0018210	peptidyl-threonine modification	-2.8	GRK2|CAMK2A|CSNK2B|MARK2|MTOR|GSK3B|MAP3K10|PRKCD|STK11|TGFBR2|ULK1|DYRK1B|CDC42BPB|HIPK2|WNK1|TTBK1|HIPK1|SBK1	-0.94
GO Biological Processes	GO:0032273	positive regulation of protein polymerization	-2.8	RHOA|DCTN1|MTOR|MECP2|NUMA1|PAK1|PFN1|NCK2|ARPC2|BAIAP2|CLASP1|CDC42EP4|GIT1|TPPP3|SLAIN2|MLST8|PINK1|TTBK1	-0.94
GO Biological Processes	GO:0043524	negative regulation of neuron apoptotic process	-2.8	APOE|RHOA|BOK|CNTFR|GABRA5|GABRB2|GPI|GRN|HIF1A|IL6ST|MECP2|PRKCG|SNCB|STXBP1|WFS1|PPARGC1A|FAIM2|TOX3|HIPK2|PCDHGC4|PINK1|CPEB4|DNAJC5|BHLHB9|AGAP2|VSTM2L	-0.94
GO Biological Processes	GO:0098970	postsynaptic neurotransmitter receptor diffusion trapping	-2.8	DLG4|CACNG3|CACNG2|CACNG7|SHISA6	-0.93
GO Biological Processes	GO:0010968	regulation of microtubule nucleation	-2.8	DCTN1|MECP2|PAK1|EML2|GIT1	-0.93
GO Biological Processes	GO:0097484	dendrite extension	-2.8	STK11|CYFIP1|CYFIP2|CDKL3|TMEM108	-0.93
GO Biological Processes	GO:0072102	glomerulus morphogenesis	-2.8	BMP4|NOTCH2|NOTCH3|MTSS1|KIRREL3	-0.93
GO Biological Processes	GO:0099628	neurotransmitter receptor diffusion trapping	-2.8	DLG4|CACNG3|CACNG2|CACNG7|SHISA6	-0.93
GO Biological Processes	GO:0090129	positive regulation of synapse maturation	-2.8	CAMK2B|NEUROD2|NRXN1|ADGRL1|DAB2IP	-0.93
GO Biological Processes	GO:0098953	receptor diffusion trapping	-2.8	DLG4|CACNG3|CACNG2|CACNG7|SHISA6	-0.93
GO Biological Processes	GO:0051592	response to calcium ion	-2.8	ACTG1|ADCY1|ADD1|CALM1|GDI1|HPCA|JUND|MEF2A|NEUROD2|PENK|PPP3CA|SLC6A1|SMPD1|STIM1|RASAL1|CPNE3|SYT7|CACNG2|AHCYL1|SYT11|CLIC4|SYT17|CPNE5|SLC25A23|PEF1	-0.93
GO Biological Processes	GO:0006984	ER-nucleus signaling pathway	-2.8	ATF4|ATF6B|GSK3B|NFE2L2|SREBF2|WFS1|SCAP|INSIG2|QRICH1|EIF2A	-0.93
GO Biological Processes	GO:0070316	regulation of G0 to G1 transition	-2.8	ACTB|PPP2R5B|SMARCA2|SMARCA4|SMARCC2|ARID1A|BCL7B|ARID1B|DAB2IP|ARID2	-0.93
GO Biological Processes	GO:0031623	receptor internalization	-2.8	ACHE|GRK2|AP2A1|AP2A2|CD36|AP2M1|DNM1|LRP1|EZR|CACNG3|CACNG2|CALY|LMBRD1|ACKR3|CACNG7	-0.93
GO Biological Processes	GO:0048813	dendrite morphogenesis	-2.8	CTNNA2|CTNND2|DLG4|DSCAM|DVL1|CELSR2|EPHB1|EPHB2|FYN|LRP4|MAP6|MEF2A|WASL|DTNBP1|SHANK3	-0.93
GO Biological Processes	GO:1902894	negative regulation of miRNA transcription	-2.8	BMP4|NFIB|PPARD|RARA|SOX9|SRF|TGFB1	-0.93
GO Biological Processes	GO:0098962	regulation of postsynaptic neurotransmitter receptor activity	-2.8	DLGAP2|DLGAP1|DLGAP4|NPTXR|DLGAP3|SHISA6|SHISA9	-0.93
GO Biological Processes	GO:0034764	positive regulation of transmembrane transport	-2.8	ABL1|AGT|AKT2|ANK2|ATP1B2|ATP2A1|C3|CA2|CALM1|EPHB2|G6PD|GLRX|GRIN1|HTT|KCNH2|MEF2A|NFE2L2|NTSR1|PPP3CA|SLC1A2|STIM1|THY1|AKAP6|CACNG3|CACNG2|CLIP3|EHD3|NLGN3|AMIGO1|STIM2|PINK1|WNK1|WNK2|SHANK3	-0.93
GO Biological Processes	GO:0060213	positive regulation of nuclear-transcribed mRNA poly(A) tail shortening	-2.8	ZFP36|TOB1|TNRC6B|PABPC1|AGO2|EIF4ENIF1	-0.91
GO Biological Processes	GO:0099563	modification of synaptic structure	-2.8	PFN1|ARHGAP44|BAIAP2|SYNPO|CYFIP1|DLGAP3	-0.91
GO Biological Processes	GO:1900153	positive regulation of nuclear-transcribed mRNA catabolic process, deadenylation-dependent decay	-2.8	ZFP36L1|ZFP36|TOB1|TNRC6B|PABPC1|AGO2	-0.91
GO Biological Processes	GO:0031122	cytoplasmic microtubule organization	-2.7	RHOA|DCTN1|DYNC1H1|DVL1|NUMA1|TUBG1|EZR|CLIP2|AXIN1|CLASP1|CLIP3|SLAIN2|CAMSAP3|CAMSAP1	-0.9
GO Biological Processes	GO:0051495	positive regulation of cytoskeleton organization	-2.7	ABL1|RHOA|RHOC|DCTN1|DYNC1H1|LPAR1|MTOR|LIMK1|MECP2|NF2|NUMA1|PAK1|PFN1|SDC4|NCK2|WASL|MTSS1|WDR1|ARPC2|SORBS3|BAIAP2|STMN2|SYNPO|CYFIP1|CLASP1|CDC42EP4|NUP62|GIT1|RGCC|PDXP|SLAIN2|MLST8	-0.87
GO Biological Processes	GO:0099637	neurotransmitter receptor transport	-2.7	ARHGAP44|CACNG3|CACNG2|CPLX1|CLSTN1|NSG1|CACNG7|STX1B	-0.87
GO Biological Processes	GO:0051492	regulation of stress fiber assembly	-2.7	ABL1|ACTG1|RHOA|RHOC|S1PR1|LPAR1|MTOR|LIMK1|NF2|PAK1|PFN1|SDC4|TJP1|PPFIA1|SORBS3|CORO2B|CLASP1|RGCC|RHPN1	-0.87
GO Biological Processes	GO:0043523	regulation of neuron apoptotic process	-2.7	ABL1|APOE|RHOA|ATF4|BOK|CASP9|CDC34|CNTFR|G6PD|GABRA5|GABRB2|GPI|GRN|HIF1A|IL6ST|MECP2|PRKCG|SNCB|STXBP1|WFS1|SIGMAR1|PPARGC1A|FAIM2|NSMF|TOX3|HIPK2|PCDHGC4|PINK1|CPEB4|DNAJC5|BHLHB9|AGAP2|VSTM2L	-0.87
GO Biological Processes	GO:0090063	positive regulation of microtubule nucleation	-2.7	DCTN1|MECP2|PAK1|GIT1	-0.86
GO Biological Processes	GO:0072332	intrinsic apoptotic signaling pathway by p53 class mediator	-2.7	BCL3|BOK|CDKN1A|PDK2|PML|STK11|BAG6|MYBBP1A|PPP1R13B|HIPK2|SHISA5|ZNF385B|HIPK1	-0.86
GO Biological Processes	GO:0043620	regulation of DNA-templated transcription in response to stress	-2.7	ATF4|ATF6B|EGR1|EPAS1|HIF1A|HSF1|NFE2L2|TMBIM6|NCK2|BAG3|CITED2|SIRT2|SIN3A	-0.86
GO Biological Processes	GO:0030204	chondroitin sulfate metabolic process	-2.7	BGN|DCN|IDUA|CHST11|CHST12|CHST7|XYLT2|CHPF|CHST13	-0.85
GO Biological Processes	GO:1990776	response to angiotensin	-2.7	AGT|CA2|CAMK2A|COL3A1|HSF1|NFE2L2|PRKCD|AHCYL1|AGTRAP	-0.85
GO Biological Processes	GO:0001933	negative regulation of protein phosphorylation	-2.7	ABL1|AGT|APOE|BMP4|CALM1|CDKN1A|CDKN2D|DUSP1|DUSP6|DUSP7|DVL1|ENG|EPHB2|FBLN1|LRP1|LYN|MEN1|MLLT1|NF2|NPM1|PLEC|PKIA|PRKAR1A|PRKCD|PRKCZ|DNAJC3|SMPD1|NR2F2|TGFB1|THY1|TSC2|WARS1|NCK2|PLPP3|SH3BP5|MVP|TRIB1|SIRT2|NUP62|FKBP8|LATS2|ERRFI1|PMEPA1|CACTIN|SH3BP5L|DTNBP1|MYADM|SIRPA|DAB2IP	-0.85
GO Biological Processes	GO:1901215	negative regulation of neuron death	-2.7	APOE|RHOA|ATF4|BOK|CNTFR|GABRA5|GABRB2|GPI|GRN|GSK3B|HIF1A|HSF1|IL6ST|MECP2|SERPINF1|PRKCG|SNCB|STXBP1|WFS1|PPARGC1A|FAIM2|ATP13A2|TOX3|HIPK2|PCDHGC4|PINK1|CPEB4|DNAJC5|BHLHB9|DTNBP1|TMEM259|AGAP2|VSTM2L	-0.84
GO Biological Processes	GO:0051271	negative regulation of cellular component movement	-2.7	APOD|APOE|RHOA|ATP1B2|ADGRB1|BCR|COL3A1|CSNK2B|DAG1|DCN|DUSP1|ENG|FBLN1|NRG1|JUP|LRP1|MECP2|MIF|MITF|NF2|NFE2L2|NGFR|SERPINF1|PPARD|PTPRM|SRF|NR2F2|TGFB1|THY1|WASL|S1PR2|SRGAP3|TRIB1|CITED2|SIN3B|CLASP1|PTPN23|CLIC4|SIN3A|RGCC|ANGPT4|DLL4|CORO1B|SAP130|DAB2IP|ARID2	-0.83
GO Biological Processes	GO:0010977	negative regulation of neuron projection development	-2.6	APOE|RHOA|CRMP1|LPAR1|EPHB2|GAK|GDI1|LRP4|PTPRS|SPOCK1|NR2F1|THY1|VIM|ULK1|ULK2|CARM1|SEMA6B|SEMA3C|STMN2|NGEF|CDKL3|BCL11A|RGMA|TRIM46|DTNBP1|STX1B	-0.8
GO Biological Processes	GO:0060997	dendritic spine morphogenesis	-2.6	CTNND2|DLG4|DVL1|EPHB1|EPHB2|WASL|SHANK3	-0.8
GO Biological Processes	GO:0006887	exocytosis	-2.6	ANK1|KIT|LYN|MYH9|PAK1|CDK16|SEPTIN5|PTGDS|RAB3A|STX1A|STXBP1|PPFIA3|NAPA|BRSK2|SYT7|SYNGR3|SYNGR2|SYNGR1|RIMS2|SNPH|SCRN1|ARHGAP44|YKT6|CPLX2|CPLX1|RAB11FIP2|SYT11|EXOC6B|PIP5K1C|SDF4|SYT17|DNAJC5|STX1B|RAB3IP|SCAMP5|LGI3	-0.79
GO Biological Processes	GO:0061572	actin filament bundle organization	-2.6	ADD1|RHOA|MARCKS|NEDD9|SRF|EZR|ZYX|BAIAP2|SPIRE1|PDXP|CORO1B|SPIRE2|FAM171A1	-0.79
GO Biological Processes	GO:0043954	cellular component maintenance	-2.6	CSF1R|DCTN1|DLG4|FYN|ITPKA|RAB3A|TJP1|BSN|MTSS1|C1QL1|ERC1|WHRN|SDF4|CAMSAP3	-0.77
GO Biological Processes	GO:0072331	signal transduction by p53 class mediator	-2.6	BCL3|BOK|CDKN1A|MIF|PDK2|PML|STK11|BAG6|NDRG1|MYBBP1A|PAXIP1|PPP1R13B|HIPK2|SHISA5|ZNF385B|HIPK1|ACER2	-0.75
GO Biological Processes	GO:0090128	regulation of synapse maturation	-2.6	CAMK2B|NEUROD2|NRXN1|ADGRL1|CLSTN1|DAB2IP	-0.75
GO Biological Processes	GO:0060563	neuroepithelial cell differentiation	-2.6	ABL1|CDH2|SOX11|B9D1|FAM20C|TUBB	-0.75
GO Biological Processes	GO:1903543	positive regulation of exosomal secretion	-2.6	SDC4|RAB7A|HGS|ATP13A2|CHMP2A|SMPD3	-0.75
GO Biological Processes	GO:0007158	neuron cell-cell adhesion	-2.6	ASTN1|NRXN3|NRXN1|ASTN2|NLGN3|NLGN4X	-0.75
GO Biological Processes	GO:1901201	regulation of extracellular matrix assembly	-2.6	AGT|DAG1|SOX9|TGFB1|CLASP1|RGCC	-0.75
GO Biological Processes	GO:0060445	branching involved in salivary gland morphogenesis	-2.6	DAG1|FGFR2|PLXNA1|TGM2|SEMA3C|PLXND1	-0.75
GO Biological Processes	GO:0043619	regulation of transcription from RNA polymerase II promoter in response to oxidative stress	-2.5	ATF4|EPAS1|HIF1A|NFE2L2|SIN3A	-0.75
GO Biological Processes	GO:1901203	positive regulation of extracellular matrix assembly	-2.5	DAG1|SOX9|TGFB1|CLASP1|RGCC	-0.75
GO Biological Processes	GO:0051386	regulation of neurotrophin TRK receptor signaling pathway	-2.5	AGT|PPP2R5B|CYFIP1|CYFIP2|TMEM108	-0.75
GO Biological Processes	GO:0060174	limb bud formation	-2.5	FGFR2|SOX9|SOX11|SEMA3C|ZNF219	-0.75
GO Biological Processes	GO:0010594	regulation of endothelial cell migration	-2.5	ABL1|AGT|APOE|RHOA|ADGRB1|BMP4|SCARB1|CSNK2B|DCN|FGFR1|GPI|GRN|HIF1A|JUP|MECP2|NFE2L2|SERPINF1|PTPRM|SPARC|NR2F2|TGFB1|PLPP3|BCAR1|FOXP1|RGCC|ANGPT4|DLL4|DAB2IP|EMC10	-0.74
GO Biological Processes	GO:0097193	intrinsic apoptotic signaling pathway	-2.5	ABL1|ATF4|ATP2A1|BCL3|BNIP3|BOK|CASP9|CDKN1A|MAP3K5|PDK2|PML|PRKCD|STK11|TMBIM6|BAG6|CUL4A|BRSK2|MYBBP1A|PPP1R13B|PPP1R15A|HIPK2|SHISA5|QRICH1|ZNF385B|DAB2IP|HIPK1	-0.74
GO Biological Processes	GO:0007626	locomotory behavior	-2.5	ABCA2|ADCY5|APBA1|APOE|ASTN1|CHRNB2|DLG4|DSCAM|EGR1|GPR37|NRG1|MECP2|NTSR1|PENK|SELENOP|SLC6A3|B4GALT2|MTA1|NCOR1|PUM1|NCOA2|C1QL1|RASD2|GIT1|HIPK2|SOBP|ANKH|PAK6|SEZ6|LGI4|LRRTM1	-0.72
GO Biological Processes	GO:0043393	regulation of protein binding	-2.5	ABL1|ACTB|ADD1|TLE5|APOE|BMP4|CDKN1A|CRMP1|CSNK1E|ACE|DVL1|MARK2|GOLGA2|GSK3B|HSF1|LOX|LRP1|MEN1|PPP1CA|PRKCD|TCF7L2|TMBIM6|RAPGEF2|PLXND1|LDOC1|BAMBI|HIPK2|DACT1|RGMA|CTNNBIP1|DTNBP1|TTBK1	-0.72
GO Biological Processes	GO:0018105	peptidyl-serine phosphorylation	-2.5	GRK2|AKT2|CAMK2A|CSNK1E|CSNK1G2|MARK2|MTOR|GAS6|GSK3B|MARK1|MAP3K10|PRKCD|PRKCG|PRKCZ|PRKX|TGFBR2|ULK1|BRSK2|DYRK1B|MAP3K13|ULK2|MAST2|LATS2|HIPK2|PINK1|WNK1|BRSK1|TTBK1|STK32A|HIPK1|SBK1	-0.69
GO Biological Processes	GO:0098926	postsynaptic signal transduction	-2.5	ACHE|GRK2|CHRM1|CHRNB2|GNB1|NRG1|LY6E|LY6H|HRH3|CRTC1	-0.68
GO Biological Processes	GO:0006099	tricarboxylic acid cycle	-2.4	ACO2|CS|IDH2|IDH3G|OGDH|PDHA1|SDHA|SDHC|SDHAF2	-0.66
GO Biological Processes	GO:0009649	entrainment of circadian clock	-2.4	NR2F6|PER1|PML|PPP1CA|PPP1CC|MTA1|PHLPP1|CRTC1|FBXL17	-0.66
GO Biological Processes	GO:0043244	regulation of protein-containing complex disassembly	-2.4	ADD1|BNIP3|CAPZB|EIF5A|FLII|MAP1A|MID1|TBC1D25|TWF1|SPTAN1|SPTBN1|SPTBN2|UVRAG|WDR1|STMN2|TRIOBP|CLEC16A|CLASP1|MAP1S|PDXP|SCAF4|CAMSAP3|CAMSAP1	-0.66
GO Biological Processes	GO:0060998	regulation of dendritic spine development	-2.4	APOE|KIF1A|CAMK2B|EPHB2|ITPKA|MAPK6|PTPRS|BAIAP2|NGEF|BHLHB9|DTNBP1|SHANK3|SDK1	-0.66
GO Biological Processes	GO:0043153	entrainment of circadian clock by photoperiod	-2.4	NR2F6|PER1|PML|PPP1CA|PPP1CC|MTA1|CRTC1|FBXL17	-0.66
GO Biological Processes	GO:0071219	cellular response to molecule of bacterial origin	-2.4	ABL1|RHOA|BCR|CD36|SCARB1|EPHB2|HSF1|IRAK1|LYN|NFKBIA|NFKBIL1|PPARD|RARA|TGFB1|VIM|ZFP36|PLAA|NR1D1|TNIP1|PRPF8|SIRT2|LDOC1|GIT1|CACTIN|SIRPA|DAB2IP	-0.66
GO Biological Processes	GO:0036465	synaptic vesicle recycling	-2.4	ACTB|ACTG1|AP2M1|DNM1|GAK|RAB3A|SH3GL1|SNCB|STX1A|SYT7|SNAP91|PIP5K1C|NLGN3|NLGN4X	-0.65
GO Biological Processes	GO:0035307	positive regulation of protein dephosphorylation	-2.4	CALM1|CDH5|MTOR|PPP2R5D|PRKCD|SMPD1|TGFB1|CAMTA1|PPP1R15A|NSMF|PINK1	-0.64
GO Biological Processes	GO:0071453	cellular response to oxygen levels	-2.4	ATF4|ATP6AP1|BNIP3|ZFP36L1|EGR1|EPAS1|MTOR|HIF1A|IRAK1|KCNK2|NFE2L2|PPARD|CITED2|NDRG1|SIRT2|RGCC|HIPK2|NOP53|ANGPT4|MIEF1|RPTOR|MLST8|PINK1|CPEB4|CCDC115	-0.63
GO Biological Processes	GO:0110020	regulation of actomyosin structure organization	-2.4	ABL1|ACTG1|RHOA|RHOC|S1PR1|LPAR1|MTOR|LIMK1|NF2|PAK1|PFN1|SDC4|TJP1|PPFIA1|SORBS3|CORO2B|CLASP1|RGCC|RHPN1	-0.63
GO Biological Processes	GO:1903532	positive regulation of secretion by cell	-2.4	ACHE|GRK2|AGT|CHRNB2|HIF1A|MIF|NTSR1|OXCT1|PPARD|RAB3A|SDC4|SOX11|STX1A|STXBP1|TCF7L2|TGFB1|EZR|VSNL1|RAB7A|CACNA1G|CDK5R2|SYT7|HGS|GAB2|C2CD2L|CLASP1|ATP13A2|MYRIP|PTPN23|CHMP2A|RGCC|SMPD3|FRMD4A|LRRC8A|PINK1|DTNBP1|STX1B|SCAMP5|MYO18A	-0.63
GO Biological Processes	GO:0036294	cellular response to decreased oxygen levels	-2.4	ATF4|BNIP3|ZFP36L1|EGR1|EPAS1|MTOR|HIF1A|IRAK1|KCNK2|NFE2L2|PPARD|CITED2|NDRG1|SIRT2|RGCC|HIPK2|NOP53|ANGPT4|MIEF1|RPTOR|MLST8|PINK1|CPEB4	-0.63
GO Biological Processes	GO:0090100	positive regulation of transmembrane receptor protein serine/threonine kinase signaling pathway	-2.4	BMP4|CDH5|CREBBP|CSNK2B|ENG|GDF10|MEN1|NEO1|NOTCH2|NUMA1|SOX11|STK11|TGFB1|TGFBR2|AXIN1|CITED2|ZNF423|ZC3H3|FKBP8|HIPK2|UBE2O	-0.63
GO Biological Processes	GO:1902107	positive regulation of leukocyte differentiation	-2.4	ACTB|RHOA|BCL6|ZFP36L1|GAS6|HSF1|INPP5D|NOTCH2|PNP|PPP3CA|PRKCZ|RARA|SMARCA2|SMARCA4|SMARCC2|TGFB1|TGFBR2|ARID1A|SOX13|TOX|TRIB1|LEF1|CTNNBIP1|ZMIZ1|ARID1B|ARID2	-0.63
GO Biological Processes	GO:1903708	positive regulation of hemopoiesis	-2.4	ACTB|RHOA|BCL6|ZFP36L1|GAS6|HSF1|INPP5D|NOTCH2|PNP|PPP3CA|PRKCZ|RARA|SMARCA2|SMARCA4|SMARCC2|TGFB1|TGFBR2|ARID1A|SOX13|TOX|TRIB1|LEF1|CTNNBIP1|ZMIZ1|ARID1B|ARID2	-0.63
GO Biological Processes	GO:0072659	protein localization to plasma membrane	-2.4	AKT2|ANK1|ANK2|ATP6AP1|BBS1|BSG|CDH2|DPP6|FLOT2|GAK|GAS6|JUP|PRKCZ|RAB3A|SPTBN1|STXBP1|EZR|RAB7A|RAPGEF2|ARHGAP44|EHD1|GORASP2|NSG1|KCNIP3|EHD3|PACS1|GPR158|RAB40C|GORASP1|SYS1|MYADM|TTC7B	-0.63
GO Biological Processes	GO:0010885	regulation of cholesterol storage	-2.4	CD36|SCARB1|CES1|PPARD|SREBF2|EHD1	-0.63
GO Biological Processes	GO:1903729	regulation of plasma membrane organization	-2.4	MYH9|PRKCD|RAB3A|WASL|PLEKHM2|SH3GLB1	-0.63
GO Biological Processes	GO:0060211	regulation of nuclear-transcribed mRNA poly(A) tail shortening	-2.4	ZFP36|TOB1|TNRC6B|PABPC1|AGO2|EIF4ENIF1	-0.63
GO Biological Processes	GO:0045956	positive regulation of calcium ion-dependent exocytosis	-2.4	STX1A|STXBP1|CACNA1G|CDK5R2|SYT7|SCAMP5	-0.63
GO Biological Processes	GO:0034767	positive regulation of ion transmembrane transport	-2.4	ABL1|AGT|ANK2|ATP1B2|ATP2A1|CALM1|EPHB2|G6PD|GLRX|GRIN1|HTT|KCNH2|NTSR1|PPP3CA|STIM1|THY1|AKAP6|CACNG3|CACNG2|EHD3|NLGN3|AMIGO1|STIM2|PINK1|WNK1|WNK2|SHANK3	-0.63
GO Biological Processes	GO:0030513	positive regulation of BMP signaling pathway	-2.4	BMP4|CDH5|ENG|NEO1|NOTCH2|NUMA1|SOX11|ZNF423|FKBP8|UBE2O	-0.63
GO Biological Processes	GO:0021762	substantia nigra development	-2.4	ACTB|RHOA|CALM1|G6PD|YWHAH|INA|SYNGR3|SIRT2|NDRG2|TTBK1	-0.63
GO Biological Processes	GO:0044805	late nucleophagy	-2.4	ULK1|ULK2|ATG2A|ATG9A	-0.63
GO Biological Processes	GO:0099645	neurotransmitter receptor localization to postsynaptic specialization membrane	-2.4	DLG4|CACNG3|CACNG2|CACNG7	-0.63
GO Biological Processes	GO:0140239	postsynaptic endocytosis	-2.4	AP2A1|AP2A2|AP2M1|CALY	-0.63
GO Biological Processes	GO:0010886	positive regulation of cholesterol storage	-2.4	CD36|SCARB1|SREBF2|EHD1	-0.63
GO Biological Processes	GO:0031086	nuclear-transcribed mRNA catabolic process, deadenylation-independent decay	-2.4	ZFP36L1|ZFP36|EDC4|DCP1B	-0.63
GO Biological Processes	GO:0098814	spontaneous synaptic transmission	-2.4	RIMS2|RPH3A|NSG1|STX1B	-0.63
GO Biological Processes	GO:2000822	regulation of behavioral fear response	-2.4	APOE|EPHB2|NPAS2|PENK	-0.63
GO Biological Processes	GO:0098884	postsynaptic neurotransmitter receptor internalization	-2.4	AP2A1|AP2A2|AP2M1|CALY	-0.63
GO Biological Processes	GO:0030853	negative regulation of granulocyte differentiation	-2.4	INPP5D|RARA|CUL4A|TRIB1	-0.63
GO Biological Processes	GO:0001955	blood vessel maturation	-2.4	CDH5|S1PR1|MMP2|ANKRD17	-0.63
GO Biological Processes	GO:0099633	protein localization to postsynaptic specialization membrane	-2.4	DLG4|CACNG3|CACNG2|CACNG7	-0.63
GO Biological Processes	GO:2000969	positive regulation of AMPA receptor activity	-2.4	CACNG3|CACNG2|NLGN3|SHANK3	-0.63
GO Biological Processes	GO:0050774	negative regulation of dendrite morphogenesis	-2.4	PPP3CA|YWHAH|RAPGEF2|GORASP1	-0.63
GO Biological Processes	GO:0008088	axo-dendritic transport	-2.4	APBA1|KIF1A|DYNC1H1|FLOT2|HIF1A|KIF5C|KLC1|MAP1A|CALY|KIF17|KLC2|TMEM108|TRIM46|NDEL1|DTNBP1|BLOC1S3	-0.63
GO Biological Processes	GO:0071222	cellular response to lipopolysaccharide	-2.4	ABL1|RHOA|BCR|CD36|SCARB1|EPHB2|HSF1|IRAK1|LYN|NFKBIA|NFKBIL1|PPARD|RARA|TGFB1|VIM|ZFP36|PLAA|NR1D1|TNIP1|PRPF8|LDOC1|GIT1|CACTIN|SIRPA|DAB2IP	-0.63
GO Biological Processes	GO:0046777	protein autophosphorylation	-2.3	ABL1|CAMK2A|CAMK2B|CSF1R|MARK2|EPHB1|FGFR1|FGFR3|FGFR2|MTOR|FYN|GSK3B|IRAK1|KIT|LYN|MAP3K10|PAK1|PRKCG|PRKX|STK11|THY1|ULK1|DYRK1B|MAP3K13|ULK2|ATP13A2|EIF2AK1|MYO3A|PINK1|WNK2|PIM3	-0.62
GO Biological Processes	GO:0006469	negative regulation of protein kinase activity	-2.3	ABL1|AGT|APOE|BMP4|CDKN1A|CDKN2D|DUSP1|DUSP7|DVL1|EPHB2|LYN|MEN1|MLLT1|NF2|NPM1|PLEC|PKIA|PRKAR1A|PRKCD|SMPD1|NR2F2|THY1|TSC2|WARS1|SH3BP5|MVP|TRIB1|NUP62|LATS2|ERRFI1|SH3BP5L|DTNBP1|DAB2IP	-0.62
GO Biological Processes	GO:0042177	negative regulation of protein catabolic process	-2.3	ADGRB1|CST3|FYN|NRG1|MAP1A|PML|CTSA|PRKCG|SGTA|TIMP3|TIMP4|BAG6|PSMF1|N4BP1|SIRT2|ATP13A2|HIPK2|NOP53|UBXN1|WAC|CCAR2|AGAP2|DAB2IP	-0.62
GO Biological Processes	GO:0048593	camera-type eye morphogenesis	-2.3	SHROOM2|ATF4|BMP4|COL8A1|DSCAM|EPHB1|EPHB2|HIF1A|NOTCH2|PTPRM|NECTIN1|SKI|SOX9|SOX11|THY1|MFN2|CITED2|HIPK2|SOX8|HIPK1|SDK1	-0.61
GO Biological Processes	GO:0007035	vacuolar acidification	-2.3	ATP6V0C|ATP6V0A1|ATP6AP1|GRN|CLIC4|CCDC115|ATP6V0E2|TMEM9|RNASEK	-0.61
GO Biological Processes	GO:0045663	positive regulation of myoblast differentiation	-2.3	ACTB|MAP3K5|SMARCA2|SMARCA4|SMARCC2|ARID1A|LRRC8A|ARID1B|ARID2	-0.61
GO Biological Processes	GO:0014044	Schwann cell development	-2.3	AKT2|DAG1|NRG1|LAMB2|PLEC|SKI|NDRG1|SIRT2|LGI4	-0.61
GO Biological Processes	GO:0097201	negative regulation of transcription from RNA polymerase II promoter in response to stress	-2.3	TMBIM6|NCK2|BAG3|CITED2|SIRT2	-0.61
GO Biological Processes	GO:0006991	response to sterol depletion	-2.3	LYN|SREBF2|SCAP|INSIG2|EIF2A	-0.61
GO Biological Processes	GO:0060041	retina development in camera-type eye	-2.3	ACHE|ATP2B2|DSCAM|GNB1|GPM6A|HIF1A|HPCA|LAMB2|MAX|SERPINF1|PTPRM|NECTIN1|SKI|SMARCA4|SOX9|THY1|LHX2|CLIC4|HIPK2|SOX8|SLC17A7|DTNBP1|HIPK1|SDK1	-0.61
GO Biological Processes	GO:0010883	regulation of lipid storage	-2.3	C3|CD36|SCARB1|CES1|MEST|NFKBIA|PPARD|SREBF2|EHD1|PNPLA2|FITM2	-0.61
GO Biological Processes	GO:0061178	regulation of insulin secretion involved in cellular response to glucose stimulus	-2.3	ADCY5|ADRA2A|HIF1A|OXCT1|CDK16|PPARD|VSNL1|BRSK2|NR1D1|C2CD2L|PIM3	-0.61
GO Biological Processes	GO:0043270	positive regulation of ion transport	-2.3	ABL1|ADRA2A|AGT|ANK2|ATF4|ATP1B2|ATP2A1|CALM1|CAMK2A|CHRM1|CHRNB2|EPHB2|G6PD|GLRX|GRIN1|HTT|KCNH2|MIF|NTSR1|PPP3CA|SLC6A1|STIM1|STXBP1|THY1|WFS1|AKAP6|CACNG3|CACNG2|AHCYL1|EHD3|NLGN3|AMIGO1|STIM2|PINK1|WNK1|WNK2|DTNBP1|SHANK3	-0.61
GO Biological Processes	GO:0048169	regulation of long-term neuronal synaptic plasticity	-2.3	AGT|CAMK2B|DLG4|EPHB2|KIT|SYNGR1|SHANK3	-0.61
GO Biological Processes	GO:0007435	salivary gland morphogenesis	-2.3	DAG1|FGFR2|NFIB|PLXNA1|TGFB1|TGM2|SEMA3C|PLXND1	-0.6
GO Biological Processes	GO:1903859	regulation of dendrite extension	-2.3	RASAL1|PLAA|RIMS2|SYT17|BCL11A|CPNE5|CACNG7|RNF157	-0.6
GO Biological Processes	GO:0035751	regulation of lysosomal lumen pH	-2.3	ATP6V0C|ATP6V0A1|ATP6AP1|GRN|TMEM175|CCDC115|TMEM9|RNASEK	-0.6
GO Biological Processes	GO:0095500	acetylcholine receptor signaling pathway	-2.3	ACHE|GRK2|CHRM1|CHRNB2|GNB1|LY6E|LY6H|HRH3	-0.6
GO Biological Processes	GO:0050730	regulation of peptidyl-tyrosine phosphorylation	-2.3	ABL1|ADRA2A|AGT|CD36|CSF1R|ACE|DLG4|FGFR3|MTOR|FYN|GAS6|GFRA1|NRG1|HSF1|IGF2|IL6ST|KIT|LRP4|LYN|MIF|NEDD9|NF2|ENPP2|PPP2R5B|PRKCD|PRKCZ|TGFB1|THY1|NCK2|SH3BP5|MVP|ANGPT4|ERRFI1|MLST8|SH3BP5L	-0.6
GO Biological Processes	GO:0022411	cellular component disassembly	-2.3	BNIP3|BOK|C3|CALM1|CFL1|DCTN1|MARK2|GAK|GOLGA2|GSK3B|HMGA1|KLC1|MMP2|MMP15|PPP1CA|TWF1|SH3GL1|SMARCA4|SMARCC2|UVRAG|ARID1A|ULK1|GBF1|NAPA|ULK2|WDR1|BLCAP|STMN2|ATG2A|ARFIP2|CHMP2A|VTA1|WDR45B|VPS16|PINK1|ATG9A|NDEL1|PPP1R9B|RETREG3|DEDD2|ARID2	-0.59
GO Biological Processes	GO:0008038	neuron recognition	-2.3	BSG|DSCAM|MEGF8|EPHB2|ARHGAP35|TNFRSF21|NTM|ROBO4|CRTAC1|DSCAML1|AMIGO1|VSTM2L	-0.59
GO Biological Processes	GO:0001101	response to acid chemical	-2.3	RHOA|COL3A1|MTOR|FYN|GRIN1|HPCA|HSF1|LYN|MMP2|PLEC|SLC1A2|SST|TMBIM6|PKD2L1|BAIAP2|SH3BP4|NSMF|BCL11A|AMIGO1|RPTOR|CPEB4|PPP1R9B|CASTOR1	-0.59
GO Biological Processes	GO:0006898	receptor-mediated endocytosis	-2.3	ACHE|GRK2|AP2A1|AP2A2|APOE|CD36|AP2M1|DNM1|EPS15|GAK|LRP1|LRP3|TGFBR2|EZR|AP1G2|PDLIM7|SNAP91|CACNG3|CACNG2|PIP5K1C|CALY|NLGN3|LMBRD1|ACKR3|CACNG7|TMEM108|RNASEK	-0.59
GO Biological Processes	GO:0051588	regulation of neurotransmitter transport	-2.3	ADCY1|ADRA2A|APBA1|CAMK2A|DVL1|GSK3B|SEPTIN5|PRKCG|RAB3A|STX1A|STXBP1|SYN1|CPLX2|CPLX1|SYT11|PNKD|GIT1|DTNBP1|STX1B	-0.59
GO Biological Processes	GO:0043200	response to amino acid	-2.3	RHOA|COL3A1|MTOR|FYN|GRIN1|HPCA|HSF1|LYN|MMP2|SLC1A2|SST|TMBIM6|BAIAP2|SH3BP4|NSMF|BCL11A|AMIGO1|RPTOR|CPEB4|PPP1R9B|CASTOR1	-0.59
GO Biological Processes	GO:0050433	regulation of catecholamine secretion	-2.3	ADRA2A|GRK2|AGT|CHRNA4|CHRNB2|RAB3A|STX1A|SYT7|HRH3|SYT11|SYT17|PINK1|DTNBP1	-0.59
GO Biological Processes	GO:0051965	positive regulation of synapse assembly	-2.3	ADGRB1|EPHB1|EPHB2|NRXN1|CLSTN3|CLSTN1|NLGN3|AMIGO1|LRRN1|BHLHB9|LRRC4B|SLITRK1|LRRTM1|LRRC24	-0.59
GO Biological Processes	GO:0032233	positive regulation of actin filament bundle assembly	-2.3	ABL1|RHOA|RHOC|LPAR1|MTOR|LIMK1|NF2|PAK1|PFN1|SDC4|MTSS1|SORBS3|SYNPO|RGCC	-0.59
GO Biological Processes	GO:0002064	epithelial cell development	-2.3	ATF4|BMP4|KLF5|CDH2|E2F4|FASN|FOSL2|RAPGEF1|HIF1A|IL6ST|LAMB2|MSN|NOTCH2|PLEC|RARA|SOX9|TJP1|EZR|VIM|WNT7B|RAPGEF2|FEM1B|SIPA1L3|CLIC4|SOX8|ROBO4|BCL11B|CCM2|MYADM	-0.59
GO Biological Processes	GO:0015988	energy coupled proton transmembrane transport, against electrochemical gradient	-2.3	COX1|ND4|ND5	-0.59
GO Biological Processes	GO:1905274	regulation of modification of postsynaptic actin cytoskeleton	-2.3	RHOA|BAIAP2|CYFIP1	-0.59
GO Biological Processes	GO:0015990	electron transport coupled proton transport	-2.3	COX1|ND4|ND5	-0.59
GO Biological Processes	GO:1902396	protein localization to bicellular tight junction	-2.3	ACTG1|CDH5|TJP1	-0.59
GO Biological Processes	GO:0051295	establishment of meiotic spindle localization	-2.3	MYH9|SPIRE1|SPIRE2	-0.59
GO Biological Processes	GO:1900126	negative regulation of hyaluronan biosynthetic process	-2.3	AP2A1|TGFB1|SMPD3	-0.59
GO Biological Processes	GO:0035272	exocrine system development	-2.3	DAG1|FGFR2|IGF2|NFIB|PLXNA1|SOX9|TGFB1|TGM2|SEMA3C|PLXND1	-0.58
GO Biological Processes	GO:0062197	cellular response to chemical stress	-2.3	ABL1|ATF4|BNIP3|ZFP36L1|CAT|CD36|EPAS1|MTOR|FYN|G6PD|HIF1A|HSF1|MAP3K5|MMP2|NFE2L1|NFE2L2|PDK2|PENK|PLEC|PML|PRKCD|PYCR1|LONP1|KEAP1|SIGMAR1|PPARGC1A|SIRT2|ATP13A2|SIN3A|RWDD1|ERRFI1|TMEM161A|SMPD3|TBC1D24|RPTOR|MLST8|PINK1|SLC4A11|AGAP3|SIRPA	-0.58
GO Biological Processes	GO:0006006	glucose metabolic process	-2.2	AKT2|APOD|ATF4|SLC25A10|G6PD|GPI|HK1|IGF2|FOXK2|PC|PDHA1|PDK2|PFKP|PPARD|PPARGC1A|G6PC3|HECTD4	-0.57
GO Biological Processes	GO:0032091	negative regulation of protein binding	-2.2	ACTB|TLE5|CDKN1A|CRMP1|CSNK1E|ACE|DVL1|GOLGA2|GSK3B|PPP1CA|PRKCD|TMBIM6|DACT1|RGMA|CTNNBIP1|DTNBP1|TTBK1	-0.57
GO Biological Processes	GO:0018209	peptidyl-serine modification	-2.2	GRK2|AKT2|BGN|CAMK2A|CSNK1E|CSNK1G2|DCN|MARK2|MTOR|GAS6|GSK3B|MARK1|MAP3K10|PRKCD|PRKCG|PRKCZ|PRKX|TGFBR2|ULK1|BRSK2|DYRK1B|MAP3K13|ULK2|MAST2|LATS2|HIPK2|PINK1|WNK1|BRSK1|TTBK1|STK32A|HIPK1|SBK1	-0.55
GO Biological Processes	GO:0035264	multicellular organism growth	-2.2	APBA1|ZFP36L1|COL3A1|MTOR|NOTCH2|PLEC|RARA|SLC1A2|SP2|SPTBN2|FKBP8|CLIC4|SMPD3|CCM2|STK40|SLITRK1	-0.55
GO Biological Processes	GO:0010874	regulation of cholesterol efflux	-2.2	ABCA2|ABCA3|APOE|CES1|GPS2|LRP1|NFKBIA|PLTP|SREBF2	-0.55
GO Biological Processes	GO:0097061	dendritic spine organization	-2.2	CTNND2|DLG4|DVL1|EPHB1|EPHB2|FYN|ITPKA|WASL|SHANK3	-0.55
GO Biological Processes	GO:0043537	negative regulation of blood vessel endothelial cell migration	-2.2	APOE|RHOA|CSNK2B|JUP|MECP2|TGFB1|RGCC|ANGPT4|DLL4	-0.55
GO Biological Processes	GO:1903541	regulation of exosomal secretion	-2.2	SDC4|RAB7A|HGS|ATP13A2|CHMP2A|SMPD3	-0.54
GO Biological Processes	GO:0030206	chondroitin sulfate biosynthetic process	-2.2	CHST11|CHST12|CHST7|XYLT2|CHPF|CHST13	-0.54
GO Biological Processes	GO:0051156	glucose 6-phosphate metabolic process	-2.2	G6PD|GPI|HK1|TALDO1|TKT|G6PC3	-0.54
GO Biological Processes	GO:0023061	signal release	-2.2	DVL1|LYN|CDK16|SEPTIN5|PTPRN2|RAB3A|STX1A|STXBP1|SYN1|VGF|PPFIA3|NAPA|SYT7|NRXN1|RIMS2|SNPH|CPLX2|CPLX1|HRH3|RAB11FIP2|RPH3A|PIP5K1C|SMPD3|DNAJC5|BRSK1|STX1B	-0.54
GO Biological Processes	GO:0002065	columnar/cuboidal epithelial cell differentiation	-2.2	ABL1|BMP4|KLF5|CDH2|FASN|FGFR2|HIF1A|IL6ST|MEN1|RARA|SOX11|B9D1|FAM20C|TUBB	-0.54
GO Biological Processes	GO:0032147	activation of protein kinase activity	-2.2	ABL1|ADRA2A|MARK2|MTOR|GAS6|NRG1|IRAK1|PRKCD|PRKCZ|RPLP1|STK11|TGFBR2|AXIN1|MADD|CDK5R2|TRAF4|RGCC|ANGPT4|RPTOR|PINK1|WNK1|AGAP2|MOB3A	-0.53
GO Biological Processes	GO:0071216	cellular response to biotic stimulus	-2.2	ABL1|RHOA|BCR|CD36|SCARB1|EPHB2|GSK3B|HSF1|IRAK1|LYN|NFKBIA|NFKBIL1|NOTCH2|PPARD|RARA|TGFB1|VIM|WFS1|ZFP36|PLAA|NR1D1|TNIP1|PRPF8|SIRT2|LDOC1|GIT1|CACTIN|SIRPA|DAB2IP	-0.53
GO Biological Processes	GO:0010613	positive regulation of cardiac muscle hypertrophy	-2.2	AGT|IL6ST|MEF2A|PDE9A|PPP3CA|TWF1|PDE5A|AKAP6	-0.53
GO Biological Processes	GO:0014742	positive regulation of muscle hypertrophy	-2.2	AGT|IL6ST|MEF2A|PDE9A|PPP3CA|TWF1|PDE5A|AKAP6	-0.53
GO Biological Processes	GO:0009612	response to mechanical stimulus	-2.2	ACTG1|AGT|RHOA|BNIP3|CDH2|DAG1|ENG|ETV1|FYN|GPI|HTT|IGFBP2|JUND|JUP|KCNK2|KIT|LTBR|MMP2|NFKBIA|PLEC|SOX9|TGFBR2|MBD2|PKD2L1|NRXN1|BAG3|CITED2|HABP4|WHRN|USP53|SHANK3	-0.53
GO Biological Processes	GO:0007042	lysosomal lumen acidification	-2.2	ATP6V0C|ATP6V0A1|ATP6AP1|GRN|CCDC115|TMEM9|RNASEK	-0.53
GO Biological Processes	GO:0038096	Fc-gamma receptor signaling pathway involved in phagocytosis	-2.2	ABL1|FYN|LIMK1|LYN|PAK1|PRKCD|PLPP4	-0.53
GO Biological Processes	GO:0002433	immune response-regulating cell surface receptor signaling pathway involved in phagocytosis	-2.2	ABL1|FYN|LIMK1|LYN|PAK1|PRKCD|PLPP4	-0.53
GO Biological Processes	GO:0030516	regulation of axon extension	-2.2	ABL1|APOE|CDH4|DPYSL2|DSCAM|MEGF8|GDI1|GSK3B|LIMK1|PTPRS|SRF|MAP3K13|SEMA6B|SEMA3C|CYFIP1|SIN3A|CDKL3|TRIM46|NDEL1	-0.52
GO Biological Processes	GO:0045921	positive regulation of exocytosis	-2.2	RAB3A|SDC4|STX1A|STXBP1|VSNL1|RAB7A|CACNA1G|CDK5R2|SYT7|HGS|GAB2|CLASP1|ATP13A2|CHMP2A|SMPD3|SCAMP5	-0.51
GO Biological Processes	GO:0034599	cellular response to oxidative stress	-2.2	ABL1|ATF4|BNIP3|CAT|CD36|EPAS1|FYN|G6PD|HIF1A|HSF1|MAP3K5|MMP2|NFE2L1|NFE2L2|PDK2|PENK|PML|PRKCD|PYCR1|LONP1|KEAP1|SIGMAR1|PPARGC1A|SIRT2|ATP13A2|SIN3A|RWDD1|TMEM161A|SMPD3|TBC1D24|PINK1|SLC4A11|AGAP3|SIRPA	-0.51
GO Biological Processes	GO:0007033	vacuole organization	-2.2	ARSB|ATP6V0C|ATP6V0A1|ATP6AP1|TPP1|MTOR|GRN|LAPTM5|RAB7A|ULK1|SYT7|BAG3|ULK2|MFN2|ATG2A|ATP13A2|ARFIP2|CHMP2A|WDR45B|TP53INP2|VPS16|ATG9A|RAB1B|TMEM175|CCDC115|CLVS1|TMEM9|RNASEK	-0.51
GO Biological Processes	GO:0060191	regulation of lipase activity	-2.2	ABL1|AGT|RHOA|RHOC|LPAR1|FGFR1|FGFR3|FGFR2|HPCA|KIT|LRP1|PCSK6|PRKCZ|PLAA|ANGPTL4	-0.5
GO Biological Processes	GO:0051452	intracellular pH reduction	-2.2	ATP6V0C|ATP6V0A1|ATP6AP1|CA2|GRN|RAB7A|CLIC4|CCDC115|ATP6V0E2|TMEM9|RNASEK	-0.5
GO Biological Processes	GO:0061387	regulation of extent of cell growth	-2.1	ABL1|APOE|CDH4|DPYSL2|DSCAM|MEGF8|GDI1|GSK3B|LIMK1|PTPRS|SRF|ULK1|MAP3K13|ULK2|SEMA6B|SEMA3C|CYFIP1|SIN3A|CDKL3|TRIM46|NDEL1	-0.5
GO Biological Processes	GO:0060538	skeletal muscle organ development	-2.1	RHOA|KLF5|CNTFR|DAG1|EGR1|MEF2D|PLEC|PPP3CA|SKI|SOX11|NR2F2|LARGE1|HMG20B|CITED2|ZBTB18|SOX8|HIVEP3|MYH14|DISP1|IGSF8|ZNF689	-0.5
GO Biological Processes	GO:0030832	regulation of actin filament length	-2.1	ADD1|RHOA|CAPZB|FLII|MTOR|ARHGAP35|PFN1|PRKCD|TWF1|SPTAN1|SPTBN1|SPTBN2|NCK2|WDR1|ARPC2|BAIAP2|TRIOBP|CYFIP1|COTL1|CDC42EP4|CYFIP2|PDXP|MLST8|SSH2|MYADM	-0.5
GO Biological Processes	GO:0008064	regulation of actin polymerization or depolymerization	-2.1	ADD1|RHOA|CAPZB|FLII|MTOR|ARHGAP35|PFN1|PRKCD|TWF1|SPTAN1|SPTBN1|SPTBN2|NCK2|WDR1|ARPC2|BAIAP2|TRIOBP|CYFIP1|COTL1|CDC42EP4|CYFIP2|PDXP|MLST8|SSH2|MYADM	-0.5
GO Biological Processes	GO:0099118	microtubule-based protein transport	-2.1	KIF5C|MAP1A|BAG3|CLIP3|CAMSAP3	-0.5
GO Biological Processes	GO:0030852	regulation of granulocyte differentiation	-2.1	INPP5D|RARA|CUL4A|TRIB1|LEF1	-0.5
GO Biological Processes	GO:0061154	endothelial tube morphogenesis	-2.1	RHOA|BMP4|CSNK2B|DLL4|CCM2	-0.5
GO Biological Processes	GO:0061418	regulation of transcription from RNA polymerase II promoter in response to hypoxia	-2.1	EGR1|HIF1A|NFE2L2|CITED2|SIRT2	-0.5
GO Biological Processes	GO:0098840	protein transport along microtubule	-2.1	KIF5C|MAP1A|BAG3|CLIP3|CAMSAP3	-0.5
GO Biological Processes	GO:0003159	morphogenesis of an endothelium	-2.1	RHOA|BMP4|CSNK2B|DLL4|CCM2	-0.5
GO Biological Processes	GO:0014009	glial cell proliferation	-2.1	CSF1R|NF2|PENK|SOX11|LGI4	-0.5
GO Biological Processes	GO:0090520	sphingolipid mediated signaling pathway	-2.1	S1PR1|EZR|S1PR2|SMPD3|SPNS2	-0.5
GO Biological Processes	GO:0007034	vacuolar transport	-2.1	ARSB|VPS51|GAK|GRN|LRP1|VPS52|LAPTM5|RAB7A|AP1G2|HGS|CACNG3|CACNG2|CLEC16A|VPS39|ATP13A2|PTPN23|CHMP2A|EHD3|VTA1|CACNG7|VPS16|PINK1|MON1A|RNF157|HGSNAT|VPS37D	-0.5
GO Biological Processes	GO:0006909	phagocytosis	-2.1	ABL1|RHOG|ADGRB1|CD36|SCARB1|FYN|GAS6|LIMK1|LRP1|LYN|MFGE8|MYH9|PAK1|PRKCD|RARA|TGM2|RAB7A|SYT7|TM9SF4|ELMO1|TUSC2|RAB11FIP2|PIP5K1C|EIF2AK1|TMEM175|PLPP4	-0.5
GO Biological Processes	GO:0010712	regulation of collagen metabolic process	-2.1	BMP4|CST3|ENG|NPPC|PPARD|TGFB1|VIM|RGCC|ERRFI1	-0.5
GO Biological Processes	GO:0051963	regulation of synapse assembly	-2.1	ADGRB1|CHRNB2|EPHB1|EPHB2|NECTIN1|NRXN1|CLSTN3|PDLIM5|CLSTN1|NLGN3|AMIGO1|LRRN1|LRFN3|BHLHB9|NTNG2|LRRC4B|SLITRK1|LRRTM1|LRRC24	-0.5
GO Biological Processes	GO:0042063	gliogenesis	-2.1	ABCA2|ABL1|AKT2|RHOA|BNIP3|BOK|CDH2|CSF1R|DAG1|GRN|NRG1|LAMB2|LRP1|LYN|NF2|NFIB|PENK|PLEC|SKI|SOX9|SOX11|VIM|CDK5R2|SOX13|NDRG1|SIRT2|SOX8|LEF1|PRDM8|ZMIZ1|MBOAT7|DAB2IP|LGI4	-0.5
GO Biological Processes	GO:0045333	cellular respiration	-2.1	ACO2|CAT|COX10|CS|IDH2|IDH3G|ATP6|COX1|COX2|ND1|ND2|ND4|ND5|ND6|NDUFS8|NDUFV3|OGDH|PDHA1|PLEC|SDHA|SDHC|UQCRC1|MYBBP1A|ME3|PPARGC1A|SDHAF2|MTFR1L|COQ9|PINK1|SLC25A22	-0.49
GO Biological Processes	GO:0008361	regulation of cell size	-2.1	ABL1|APOE|AQP4|RHOA|CDH4|DPYSL2|DSCAM|E2F4|MEGF8|MTOR|GDI1|GSK3B|LIMK1|MSN|PTPRS|SRF|ULK1|MAP3K13|ULK2|SEMA6B|SEMA3C|CYFIP1|SIN3A|CDKL3|LRRC8A|RPTOR|TRIM46|NDEL1|SHANK3|TMEM123	-0.49
GO Biological Processes	GO:0007623	circadian rhythm	-2.1	ADCY1|ZFHX3|ATF4|CSNK1E|EGR1|GSK3B|JUND|NGFR|NPAS2|PER1|PML|PPP1CA|PPP1CC|MTA1|MAGED1|NR1D1|NCOR1|HUWE1|NCOA2|MYBBP1A|RAI1|PPARGC1A|CAVIN3	-0.48
GO Biological Processes	GO:0031630	regulation of synaptic vesicle fusion to presynaptic active zone membrane	-2.1	RAB3A|STXBP1|CPLX2|CPLX1	-0.48
GO Biological Processes	GO:0038166	angiotensin-activated signaling pathway	-2.1	CA2|CAMK2A|AHCYL1|AGTRAP	-0.48
GO Biological Processes	GO:0032933	SREBP signaling pathway	-2.1	SREBF2|SCAP|INSIG2|EIF2A	-0.48
GO Biological Processes	GO:1901632	regulation of synaptic vesicle membrane organization	-2.1	RAB3A|STXBP1|CPLX2|CPLX1	-0.48
GO Biological Processes	GO:1903365	regulation of fear response	-2.1	APOE|EPHB2|NPAS2|PENK	-0.48
GO Biological Processes	GO:0150012	positive regulation of neuron projection arborization	-2.1	DLG4|DVL1|DVL3|MAP3K13	-0.48
GO Biological Processes	GO:0010713	negative regulation of collagen metabolic process	-2.1	CST3|NPPC|PPARD|ERRFI1	-0.48
GO Biological Processes	GO:0071277	cellular response to calcium ion	-2.1	ADCY1|ADD1|HPCA|JUND|MEF2A|NEUROD2|SMPD1|RASAL1|CPNE3|SYT7|SYT11|CLIC4|SYT17|CPNE5|SLC25A23	-0.48
GO Biological Processes	GO:0043242	negative regulation of protein-containing complex disassembly	-2.1	ADD1|CAPZB|FLII|MID1|TWF1|SPTAN1|SPTBN1|SPTBN2|STMN2|TRIOBP|CLEC16A|CLASP1|SCAF4|CAMSAP3|CAMSAP1	-0.48
GO Biological Processes	GO:0071456	cellular response to hypoxia	-2.1	BNIP3|ZFP36L1|EGR1|EPAS1|MTOR|HIF1A|IRAK1|KCNK2|NFE2L2|PPARD|CITED2|NDRG1|SIRT2|RGCC|HIPK2|NOP53|ANGPT4|MIEF1|RPTOR|MLST8|PINK1	-0.48
GO Biological Processes	GO:1901888	regulation of cell junction assembly	-2.1	ABL1|ACTG1|AGT|APOD|RHOA|ADGRB1|CHRNB2|ACE|EPHB1|EPHB2|RAPGEF1|NECTIN1|SDC4|THY1|TJP1|NRXN1|RAPGEF2|CLSTN3|PDLIM5|CLSTN1|CLASP1|NLGN3|AMIGO1|LRRN1|CAMSAP3|LRFN3|BHLHB9|NTNG2|LRRC4B|SLITRK1|LRRTM1|LRRC24	-0.48
GO Biological Processes	GO:0007431	salivary gland development	-2.1	DAG1|FGFR2|NFIB|PLXNA1|TGFB1|TGM2|SEMA3C|PLXND1	-0.48
GO Biological Processes	GO:0022011	myelination in peripheral nervous system	-2.1	AKT2|DAG1|NRG1|PLEC|SKI|NDRG1|SIRT2|LGI4	-0.48
GO Biological Processes	GO:0009648	photoperiodism	-2.1	NR2F6|PER1|PML|PPP1CA|PPP1CC|MTA1|CRTC1|FBXL17	-0.48
GO Biological Processes	GO:0032292	peripheral nervous system axon ensheathment	-2.1	AKT2|DAG1|NRG1|PLEC|SKI|NDRG1|SIRT2|LGI4	-0.48
GO Biological Processes	GO:1905145	cellular response to acetylcholine	-2.1	ACHE|GRK2|CHRM1|CHRNB2|GNB1|LY6E|LY6H|HRH3	-0.48
GO Biological Processes	GO:0001893	maternal placenta development	-2.1	BSG|MEN1|PPARD|NR2F2|CITED2|LDOC1|TPPP3|ASH1L	-0.48
GO Biological Processes	GO:0043405	regulation of MAP kinase activity	-2.1	ADRA2A|AGT|APOE|BMP4|DUSP1|DUSP7|DVL3|FGFR1|IRAK1|KIT|LYN|MAP3K5|MIF|MAP3K10|PAK1|PRKCD|SMPD1|TGFB1|AXIN1|PDE5A|KSR1|HGS|MAP3K13|MAGED1|TRIB1|NUP62|DTNBP1|DAB2IP	-0.47
GO Biological Processes	GO:0030510	regulation of BMP signaling pathway	-2.1	ABL1|BMP4|CDH5|ENG|NEO1|NOTCH2|NUMA1|PCSK6|HTRA1|SKI|SOX11|TOB1|ZNF423|FKBP8|BAMBI|HIPK2|RGMA|UBE2O|HTRA3	-0.47
GO Biological Processes	GO:1901879	regulation of protein depolymerization	-2.1	ADD1|CAPZB|FLII|MAP1A|MID1|TWF1|SPTAN1|SPTBN1|SPTBN2|WDR1|STMN2|TRIOBP|CLASP1|MAP1S|PDXP|CAMSAP3|CAMSAP1	-0.47
GO Biological Processes	GO:0002011	morphogenesis of an epithelial sheet	-2.1	RHOA|RHOC|DAG1|DVL1|MEGF8|ARHGAP35|NOTCH2|SOX11|SRF|DLL4|MRTFA	-0.47
GO Biological Processes	GO:0070886	positive regulation of calcineurin-NFAT signaling cascade	-2.1	NRG1|PPP3CA|AKAP6|CHERP|CAMTA1|LMCD1	-0.47
GO Biological Processes	GO:0030521	androgen receptor signaling pathway	-2.1	RHOA|ARID1A|PLPP1|RWDD1|PMEPA1|ZMIZ1	-0.47
GO Biological Processes	GO:0106058	positive regulation of calcineurin-mediated signaling	-2.1	NRG1|PPP3CA|AKAP6|CHERP|CAMTA1|LMCD1	-0.47
GO Biological Processes	GO:0070262	peptidyl-serine dephosphorylation	-2.1	DUSP1|PPP1CA|PPP2R2B|PPP2R2C|PPP3CA|PPP2R2D	-0.47
GO Biological Processes	GO:0030837	negative regulation of actin filament polymerization	-2.1	ADD1|CAPZB|FLII|PFN1|PRKCD|TWF1|SPTAN1|SPTBN1|SPTBN2|TRIOBP|SSH2|MYADM	-0.47
GO Biological Processes	GO:0048488	synaptic vesicle endocytosis	-2.1	ACTB|ACTG1|AP2M1|DNM1|GAK|SH3GL1|SNCB|STX1A|SNAP91|PIP5K1C|NLGN3|NLGN4X	-0.47
GO Biological Processes	GO:0140238	presynaptic endocytosis	-2.1	ACTB|ACTG1|AP2M1|DNM1|GAK|SH3GL1|SNCB|STX1A|SNAP91|PIP5K1C|NLGN3|NLGN4X	-0.47
GO Biological Processes	GO:0010508	positive regulation of autophagy	-2.1	SLC25A5|BNIP3|DCN|GSK3B|HTT|HIF1A|PAFAH1B2|STK11|TSC2|UVRAG|PIP4K2B|ULK1|BAG3|ULK2|ATG2A|SH3BP4|GPSM1|SH3GLB1|WAC|RNF31|TP53INP2|PINK1|TRIM8	-0.47
GO Biological Processes	GO:0099558	maintenance of synapse structure	-2.1	DCTN1|DLG4|RAB3A|BSN|C1QL1|ERC1|SDF4	-0.47
GO Biological Processes	GO:0010875	positive regulation of cholesterol efflux	-2.1	ABCA3|APOE|CES1|GPS2|LRP1|NFKBIA|PLTP	-0.47
GO Biological Processes	GO:1903861	positive regulation of dendrite extension	-2.1	RASAL1|PLAA|RIMS2|SYT17|CPNE5|CACNG7|RNF157	-0.47
GO Biological Processes	GO:0046467	membrane lipid biosynthetic process	-2.1	ABCA2|CSNK1G2|B4GALNT1|SMPD1|SMPD2|UGT8|PLPP1|PLPP3|B4GALT3|GPAA1|DPM2|PIGQ|LARGE1|GAL3ST1|ST6GALNAC4|PIGT|ELOVL5|MPPE1|CERS4|PGAP3|SPNS2|PIGU|PPM1L|ACER2	-0.46
GO Biological Processes	GO:0008306	associative learning	-2.1	ABL1|AGT|CHRNB2|GABRA5|GRIN1|HIF1A|KIT|MAP1A|MECP2|NEUROD2|NRGN|SLC6A1|SRF|B4GALT2|BRSK1|LRRN4	-0.46
GO Biological Processes	GO:0016241	regulation of macroautophagy	-2	SLC25A5|ATP6V0C|ATP6V0A1|BNIP3|CAPNS1|DCN|MTOR|HTT|HIF1A|TBC1D25|PAFAH1B2|TSC2|UVRAG|PIP4K2B|ULK1|BAG3|EHMT2|ATG2A|CLEC16A|ATP13A2|GPSM1|SH3GLB1|WAC|RNF31|PINK1|ATP6V0E2	-0.46
GO Biological Processes	GO:0000165	MAPK cascade	-2	AGT|ZFP36L1|DUSP6|DUSP7|FGFR1|FGFR3|GPS1|GPS2|NRG1|HSF1|IRAK1|MEF2A|MAP3K5|MEN1|MAP3K10|PPP1CC|MAPK4|MAPK6|SOX9|TGFB1|ZFP36|MAP3K13|RAPGEF2|SH2D3C|TRIB1|RHBDD3|CCM2|SHANK3|PPM1L	-0.46
GO Biological Processes	GO:0007422	peripheral nervous system development	-2	AKT2|ADGRB1|ADGRB2|DAG1|ETV1|NRG1|LAMB2|PLEC|SKI|UGT8|CITED2|NDRG1|SIRT2|SOX8|LGI4	-0.44
GO Biological Processes	GO:0035265	organ growth	-2	AGT|S1PR1|FGFR3|FGFR2|LY6E|NPPC|PRKAR1A|RARA|SOX9|TGFBR2|PDLIM5|EHMT2|SMPD3|NLGN4X|ARID2	-0.44
GO Biological Processes	GO:0060349	bone morphogenesis	-2	ALPL|BMP4|FOXN3|COL3A1|MEGF8|FGFR3|FGFR2|MEF2D|NPPC|RARA|SKI|SOX9|TGFBR2|CITED2|INSIG2|SMPD3|ATG9A	-0.44
GO Biological Processes	GO:0008037	cell recognition	-2	ADGRB1|BSG|CD36|SCARB1|DSCAM|MEGF8|EPHB1|EPHB2|ARHGAP35|MFGE8|MSN|NCK2|UBAP2L|TNFRSF21|NTM|ROBO4|CRTAC1|DSCAML1|AMIGO1|VSTM2L	-0.43
GO Biological Processes	GO:2001222	regulation of neuron migration	-2	CAMK2A|CAMK2B|COL3A1|CTNNA2|NRG1|PLAA|RAPGEF2|NSMF|NTNG2|DAB2IP	-0.43
GO Biological Processes	GO:0017156	calcium-ion regulated exocytosis	-2	MYH9|RAB3A|STX1A|STXBP1|SYT7|RIMS2|SYT11|SDF4|SYT17|STX1B	-0.43
GO Biological Processes	GO:1900271	regulation of long-term synaptic potentiation	-2	ABL1|ADCY1|APOE|EPHB2|GSK3B|NRGN|CYP46A1|CRTC1|NSG1|SHANK3	-0.43
GO Biological Processes	GO:0051899	membrane depolarization	-2	ABL1|ANK2|HCN2|CHRNA4|CHRNB2|KCNH2|PRKCZ|YWHAH|CACNA1G|CACNG2	-0.43
GO Cellular Components	GO:0098794	postsynapse	-17	ABL1|ABR|ACTB|ACTG1|ADCY1|ADD1|ADRA2A|GRK2|AP2A1|AP2A2|ANK2|APBA1|APBA2|RHOA|ATP2B2|ADGRB1|BCR|BNIP3|DAGLA|CAMK2A|CAPZB|CDH2|CHRM1|CHRNA4|CHRNB2|AP2M1|CTNND2|DAG1|DLG4|DVL1|EPHB2|FYN|GABRA3|GABRA5|GABRB2|GPM6A|GRID1|GRIN1|GRIN2B|GRM7|GSK3B|HTT|HPCA|ITPKA|KCNC3|LRP4|LYN|MECP2|ND2|NGFR|NRGN|NTSR1|PLCB3|PPP1CA|PPP1CC|PPP3CA|PRKCG|PRKCZ|PTPRS|RAB3A|SLC6A1|SLC6A3|SLC6A9|SPOCK1|SPTBN1|SPTBN2|STX1A|STXB…	-13
GO Cellular Components	GO:0030424	axon	-15	ABL1|ABR|ACTB|ACTG1|ADRA2A|RHOA|ATP1A3|ATP2B3|KIF1A|BCR|BSG|DAGLA|CFL1|CHRM1|COPA|CRMP1|CTNNA2|DAG1|DCTN1|DLG4|DYNC1H1|DSCAM|DVL1|EPHB1|EPHB2|GDI1|GFRA1|GPM6A|GRIN1|GRM7|GSK3B|HTT|NRG1|HIF1A|HPCA|KCNC3|KCNC4|KCNK2|KCNQ2|KCNQ3|KIF5C|KLC1|MAP1A|MAP6|NEO1|NFIB|NGFR|NRGN|NTSR1|PAK1|SERPINF1|PENK|PLEC|PNOC|PRKCG|PRKCZ|PTPRS|NECTIN1|RAB3A|RASGRF1|SLC1A2|SLC6A1|SLC6A3|SNCB|SPOCK1|SPTBN1|STX1A|STXBP1|SYN…	-11
GO Cellular Components	GO:0030425	dendrite	-14	ABL1|ABR|ADCY2|APBA1|APBA2|APOD|APOE|RHOA|ATF4|ATP2B2|KIF1A|ADGRB1|BCR|BNIP3|DAGLA|CAMK2A|CHRM1|CHRNA4|CTNND2|BRINP1|DLG4|DMWD|DSCAM|DVL1|MARK2|EPHB1|EPHB2|FLOT2|MTOR|FYN|GABRA3|GABRA5|GNAZ|GPM6A|GRIN1|GRM7|GSK3B|HTT|HPCA|HTR1D|IL6ST|ITPKA|KCNC3|KCNC4|KCNK1|KIF5C|LRP4|MAP1A|MAP6|MARK1|MAX|NGFR|NRGN|NTSR1|NUMA1|PAK1|PCSK2|PENK|PLEC|PNOC|PPP1CA|PPP1CC|PPP3CA|PRKCG|NECTIN1|RARA|RPL28|SYN1|THY1|WFS1|…	-10
GO Cellular Components	GO:0097447	dendritic tree	-14	ABL1|ABR|ADCY2|APBA1|APBA2|APOD|APOE|RHOA|ATF4|ATP2B2|KIF1A|ADGRB1|BCR|BNIP3|DAGLA|CAMK2A|CHRM1|CHRNA4|CTNND2|BRINP1|DLG4|DMWD|DSCAM|DVL1|MARK2|EPHB1|EPHB2|FLOT2|MTOR|FYN|GABRA3|GABRA5|GNAZ|GPM6A|GRIN1|GRM7|GSK3B|HTT|HPCA|HTR1D|IL6ST|ITPKA|KCNC3|KCNC4|KCNK1|KIF5C|LRP4|MAP1A|MAP6|MARK1|MAX|NGFR|NRGN|NTSR1|NUMA1|PAK1|PCSK2|PENK|PLEC|PNOC|PPP1CA|PPP1CC|PPP3CA|PRKCG|NECTIN1|RARA|RPL28|SYN1|THY1|WFS1|…	-10
GO Cellular Components	GO:0098793	presynapse	-12	ACTB|ACTG1|ADRA2A|GRK2|APBA1|APBA2|ATP2B2|ATP2B3|ATP6V0C|ATP6V0A1|ATP6AP1|CDH2|CHRM1|CHRNB2|AP2M1|SEPTIN1|DLG4|DNM1|DVL1|EPHB2|GABRA5|GAK|GPM6A|GRIN1|GRM7|HTT|KCNC3|KCNK2|NTSR1|CDK16|PENK|PNOC|SEPTIN5|PPP1CA|PPP1CC|PRKCG|PTPRN2|PTPRS|NECTIN1|RAB3A|SH3GL1|SLC1A2|SLC6A1|SLC6A3|SLC6A9|SNCB|SPTBN2|STX1A|STXBP1|SYN1|WFS1|RAB7A|PPFIA1|PPFIA3|NAPA|BSN|SYT7|SYNGR3|SYNGR2|SYNGR1|NRXN1|RIMS2|SNPH|SNAP91|AR…	-8.8
GO Cellular Components	GO:0099572	postsynaptic specialization	-12	ADCY1|ADD1|ADRA2A|ATP2B2|ADGRB1|BCR|BNIP3|DAGLA|CAMK2A|CAPZB|CDH2|CHRM1|CHRNB2|CTNND2|DLG4|DVL1|FYN|GABRA3|GABRA5|GABRB2|GRID1|GRIN1|GRIN2B|LRP4|LYN|ND2|NGFR|NRGN|PRKCG|PRKCZ|PTPRS|SLC6A9|SPOCK1|SPTBN1|STX1A|SYN1|TSC2|NCK2|PKP4|BSN|DLGAP2|DLGAP1|CLSTN3|LZTS3|ARHGAP44|IQSEC1|SIGMAR1|CACNG3|CACNG2|BAIAP2|PDLIM5|SYNPO|DLGAP4|ADGRL1|CLSTN1|SYT11|CRTC1|RUSC1|NSMF|GIT1|BCL11A|NLGN3|ANKS1B|NLGN4X|LRFN1|…	-8.6
GO Cellular Components	GO:0098984	neuron to neuron synapse	-12	ADCY1|ADD1|ADRA2A|ATP1A3|ATP1B2|ATP2B2|ADGRB1|BCR|BNIP3|DAGLA|CAMK2A|CAPZB|CDH2|CHRM1|CTNND2|DLG4|DVL1|FYN|GRID1|GRIN1|GRIN2B|GRM7|LRP4|LYN|ND2|NGFR|NRGN|NTSR1|PENK|PRKCG|PRKCZ|PTPRS|NECTIN1|SLC6A9|SPOCK1|SPTBN1|STX1A|SYN1|TSC2|NCK2|PKP4|BSN|SYT7|DLGAP2|DLGAP1|CLSTN3|LZTS3|ARHGAP44|IQSEC1|SIGMAR1|CACNG3|CACNG2|BAIAP2|PDLIM5|SYNPO|ADGRL1|CLSTN1|SYT11|CRTC1|RUSC1|NSMF|GIT1|BCL11A|NLGN3|ANKS1B|NLGN4…	-8.3
GO Cellular Components	GO:0098978	glutamatergic synapse	-11	ABR|ACTB|ADCY1|ADRA2A|APBA1|APOE|RHOA|ATP2B2|ATP2B3|BCR|CHRM1|AP2M1|DAG1|DLG4|DNM1|DVL1|EPHB1|EPHB2|FLOT2|GPM6A|GRID1|GSK3B|NRG1|HPCA|LYN|NRGN|PFN1|PPP1CA|PPP1CC|PPP3CA|PRKAR1A|PRKCZ|SH3GL1|SLC1A2|SPTBN1|SPTBN2|STX1A|STXBP1|PPFIA3|NAPA|BSN|DLGAP2|DLGAP1|CLSTN3|ARHGAP44|ARPC2|CACNG3|CACNG2|BAIAP2|CPLX2|CPLX1|DLGAP4|CLSTN1|ADGRL3|CRTC1|NPTXR|NSG1|CALY|FXYD6|NLGN3|NLGN4X|DLGAP3|CACNG7|LRFN3|ARHGAP39…	-7.5
GO Cellular Components	GO:0032279	asymmetric synapse	-11	ADCY1|ADD1|ADRA2A|ATP2B2|ADGRB1|BCR|BNIP3|DAGLA|CAMK2A|CAPZB|CDH2|CHRM1|CTNND2|DLG4|DVL1|FYN|GRID1|GRIN1|GRIN2B|GRM7|LRP4|LYN|ND2|NGFR|NRGN|PRKCG|PRKCZ|PTPRS|SLC6A9|SPOCK1|SPTBN1|STX1A|SYN1|TSC2|NCK2|PKP4|BSN|DLGAP2|DLGAP1|CLSTN3|LZTS3|ARHGAP44|IQSEC1|SIGMAR1|CACNG3|CACNG2|BAIAP2|PDLIM5|SYNPO|ADGRL1|CLSTN1|SYT11|CRTC1|RUSC1|NSMF|GIT1|BCL11A|NLGN3|ANKS1B|NLGN4X|LRFN1|DLGAP3|CACNG7|TMEM108|LRFN3|CP…	-7.5
GO Cellular Components	GO:0014069	postsynaptic density	-10	ADCY1|ADD1|ADRA2A|ATP2B2|ADGRB1|BCR|BNIP3|DAGLA|CAMK2A|CAPZB|CDH2|CHRM1|CTNND2|DLG4|DVL1|FYN|GRID1|GRIN1|GRIN2B|LRP4|LYN|ND2|NGFR|NRGN|PRKCG|PRKCZ|PTPRS|SLC6A9|SPOCK1|SPTBN1|STX1A|SYN1|TSC2|NCK2|PKP4|BSN|DLGAP2|DLGAP1|CLSTN3|LZTS3|ARHGAP44|IQSEC1|SIGMAR1|CACNG3|CACNG2|BAIAP2|PDLIM5|SYNPO|ADGRL1|CLSTN1|SYT11|CRTC1|RUSC1|NSMF|GIT1|BCL11A|ANKS1B|NLGN4X|LRFN1|DLGAP3|CACNG7|TMEM108|LRFN3|CPEB4|ABHD17A…	-7
GO Cellular Components	GO:0097060	synaptic membrane	-9.3	ADCY1|ADRA2A|ANK2|APBA1|ATP2B2|ATP2B3|DAGLA|CDH2|CHRM1|CHRNA4|CHRNB2|DAG1|DLG4|DNM1|EPHB2|GABRA3|GABRA5|GABRB2|GPM6A|GRID1|GRIN1|GRIN2B|GRM7|KCNC3|KCNK1|LRP4|NRGN|PRKCG|PTPRS|NECTIN1|SLC1A2|SLC6A1|SLC6A3|SLC6A9|STX1A|STXBP1|PDLIM4|SYT7|NRXN1|GABBR2|RIMS2|CLSTN3|SNAP91|SIGMAR1|CACNG3|CACNG2|BAIAP2|ADGRL1|CLSTN1|RPH3A|FAIM2|ERC1|SYT11|NSG1|FXYD6|NLGN3|TENM2|NLGN4X|LRFN1|CADM3|CACNG7|LRFN3|ABHD17A|T…	-6.2
GO Cellular Components	GO:0044297	cell body	-8.8	ABL1|ADRA2A|APOD|APOE|ASTN1|ATP1A3|ATP1B2|ATP2B2|CHRNA4|CRMP1|CTNND2|BRINP1|DCTN1|DMWD|DSCAM|DVL1|EPHB2|FYN|GABRA5|GDI1|GFRA1|GNAZ|GPM6A|HCFC1|HPCA|IL6ST|KCNC3|KCNC4|KCNK1|KCNK2|KCNN1|KIF5C|LRP4|MAP1A|NF2|NGFR|NRGN|NTSR1|NUMA1|PCSK2|PDE9A|SERPINF1|PENK|PNOC|PPP1CA|PRKCZ|PTPRS|RPL28|SLC1A2|SLC6A1|SLC6A3|SNCB|SPTBN2|SST|SYN1|THY1|VGF|NRXN1|PITPNM1|RAPGEF2|TUBB4A|BAIAP2|YKT6|CPLX2|CPLX1|STMN2|SYNPO|…	-5.8
GO Cellular Components	GO:0098948	intrinsic component of postsynaptic specialization membrane	-8.2	ADCY1|ADRA2A|ATP2B2|CDH2|CHRM1|CHRNB2|DLG4|GABRA3|GABRA5|GABRB2|GRID1|PTPRS|CLSTN3|CACNG3|CACNG2|NLGN3|NLGN4X|LRFN1|CACNG7|LRFN3|ABHD17A|LRRC4B|SLITRK1|LRRTM1|SHISA6|RGS7BP|SHISA9	-5.3
GO Cellular Components	GO:0043025	neuronal cell body	-8.1	ABL1|ADRA2A|APOD|APOE|ASTN1|ATP1A3|ATP2B2|CHRNA4|CRMP1|CTNND2|BRINP1|DCTN1|DMWD|DSCAM|DVL1|EPHB2|GABRA5|GDI1|GFRA1|GPM6A|HCFC1|HPCA|IL6ST|KCNC3|KCNC4|KCNK1|KCNK2|KCNN1|KIF5C|LRP4|MAP1A|NGFR|NRGN|NTSR1|NUMA1|PCSK2|PDE9A|SERPINF1|PENK|PNOC|PPP1CA|PRKCZ|PTPRS|SLC6A1|SLC6A3|SNCB|SPTBN2|SST|THY1|VGF|NRXN1|RAPGEF2|TUBB4A|BAIAP2|YKT6|CPLX2|CPLX1|STMN2|SYNPO|SIRT2|NCDN|CYFIP1|SYT11|ASTN2|CRTC1|ATP13A2|TX…	-5.2
GO Cellular Components	GO:0043197	dendritic spine	-7.7	ABR|APBA1|APBA2|RHOA|ATP2B2|ADGRB1|BCR|DAGLA|CAMK2A|DLG4|DVL1|EPHB2|GPM6A|GRIN1|HPCA|ITPKA|KCNC3|NGFR|NRGN|NTSR1|PPP1CA|PPP1CC|PPP3CA|PDLIM4|NR1D1|LZTS3|ARHGAP44|BAIAP2|SYNPO|RPH3A|CYFIP1|SYT11|STRN4|ANKS1B|TENM2|CPEB4|ABHD17A|DTNBP1|PPP1R9B|SHANK3|SEZ6|SHISA6|RGS7BP|SHISA9	-4.8
GO Cellular Components	GO:0099240	intrinsic component of synaptic membrane	-7.7	ADCY1|ADRA2A|ATP2B2|ATP2B3|DAGLA|CDH2|CHRM1|CHRNB2|DLG4|EPHB2|GABRA3|GABRA5|GABRB2|GPM6A|GRID1|PTPRS|NECTIN1|SLC1A2|SLC6A1|SLC6A3|SLC6A9|STX1A|SYT7|CLSTN3|CACNG3|CACNG2|FXYD6|NLGN3|NLGN4X|LRFN1|CADM3|CACNG7|LRFN3|ABHD17A|NTNG2|LRRC4B|SLITRK1|LRRTM1|SHISA6|RGS7BP|SHISA9	-4.8
GO Cellular Components	GO:0044309	neuron spine	-7.6	ABR|APBA1|APBA2|RHOA|ATP2B2|ADGRB1|BCR|DAGLA|CAMK2A|DLG4|DVL1|EPHB2|GPM6A|GRIN1|HPCA|ITPKA|KCNC3|NGFR|NRGN|NTSR1|PPP1CA|PPP1CC|PPP3CA|PDLIM4|NR1D1|LZTS3|ARHGAP44|BAIAP2|SYNPO|RPH3A|CYFIP1|SYT11|STRN4|ANKS1B|TENM2|CPEB4|ABHD17A|DTNBP1|PPP1R9B|SHANK3|SEZ6|SHISA6|RGS7BP|SHISA9	-4.8
GO Cellular Components	GO:0098936	intrinsic component of postsynaptic membrane	-6.8	ADCY1|ADRA2A|ATP2B2|DAGLA|CDH2|CHRM1|CHRNB2|DLG4|EPHB2|GABRA3|GABRA5|GABRB2|GRID1|PTPRS|SLC6A1|SLC6A3|SLC6A9|CLSTN3|CACNG3|CACNG2|FXYD6|NLGN3|NLGN4X|LRFN1|CACNG7|LRFN3|ABHD17A|LRRC4B|SLITRK1|LRRTM1|SHISA6|RGS7BP|SHISA9	-4.1
GO Cellular Components	GO:0099699	integral component of synaptic membrane	-6.7	ADCY1|ADRA2A|ATP2B2|ATP2B3|DAGLA|CDH2|CHRM1|CHRNB2|EPHB2|GABRA3|GABRA5|GABRB2|GPM6A|GRID1|PTPRS|NECTIN1|SLC1A2|SLC6A1|SLC6A3|SLC6A9|STX1A|SYT7|CLSTN3|CACNG3|CACNG2|FXYD6|NLGN3|NLGN4X|LRFN1|CADM3|CACNG7|LRFN3|LRRC4B|SLITRK1|LRRTM1|SHISA6|SHISA9	-4
GO Cellular Components	GO:0099060	integral component of postsynaptic specialization membrane	-6.6	ADCY1|ADRA2A|ATP2B2|CDH2|CHRM1|CHRNB2|GABRA3|GABRA5|GABRB2|GRID1|PTPRS|CLSTN3|CACNG3|CACNG2|NLGN3|NLGN4X|LRFN1|CACNG7|LRFN3|LRRC4B|SLITRK1|LRRTM1|SHISA6|SHISA9	-3.9
GO Cellular Components	GO:0045211	postsynaptic membrane	-6.4	ADCY1|ADRA2A|ANK2|ATP2B2|DAGLA|CDH2|CHRM1|CHRNA4|CHRNB2|DAG1|DLG4|EPHB2|GABRA3|GABRA5|GABRB2|GRID1|GRIN1|GRIN2B|GRM7|KCNC3|NRGN|PTPRS|SLC6A1|SLC6A3|SLC6A9|PDLIM4|GABBR2|CLSTN3|SIGMAR1|CACNG3|CACNG2|CLSTN1|RPH3A|FAIM2|NSG1|FXYD6|NLGN3|TENM2|NLGN4X|LRFN1|CACNG7|LRFN3|ABHD17A|TMUB1|DTNBP1|IGSF21|SHANK3|LRRC4B|SLITRK1|KCTD12|LRRTM1|SHISA6|RGS7BP|IQSEC3|SHISA9	-3.7
GO Cellular Components	GO:0099634	postsynaptic specialization membrane	-6.2	ADCY1|ADRA2A|ATP2B2|DAGLA|CDH2|CHRM1|CHRNB2|DLG4|GABRA3|GABRA5|GABRB2|GRID1|GRIN2B|PTPRS|CLSTN3|SIGMAR1|CACNG3|CACNG2|NLGN3|NLGN4X|LRFN1|CACNG7|LRFN3|ABHD17A|LRRC4B|SLITRK1|LRRTM1|SHISA6|RGS7BP|SHISA9	-3.6
GO Cellular Components	GO:0042734	presynaptic membrane	-5.9	ADRA2A|APBA1|ATP2B2|ATP2B3|CDH2|CHRM1|CHRNB2|DNM1|EPHB2|GABRA5|GPM6A|KCNC3|NECTIN1|SLC1A2|SLC6A1|SLC6A3|SLC6A9|STX1A|STXBP1|SYT7|NRXN1|RIMS2|SNAP91|ADGRL1|ERC1|SYT11|FXYD6|CADM3|LRFN3|NTNG2|IGSF21|LRRC4B|STX1B|KCTD12|RGS7BP	-3.3
GO Cellular Components	GO:0099146	intrinsic component of postsynaptic density membrane	-5.9	ADCY1|ADRA2A|ATP2B2|CHRM1|DLG4|GRID1|PTPRS|CLSTN3|CACNG3|CACNG2|LRFN1|CACNG7|LRFN3|ABHD17A|LRRC4B|SLITRK1|SHISA6|RGS7BP|SHISA9	-3.3
GO Cellular Components	GO:0099055	integral component of postsynaptic membrane	-5.8	ADCY1|ADRA2A|ATP2B2|DAGLA|CDH2|CHRM1|CHRNB2|EPHB2|GABRA3|GABRA5|GABRB2|GRID1|PTPRS|SLC6A1|SLC6A3|SLC6A9|CLSTN3|CACNG3|CACNG2|FXYD6|NLGN3|NLGN4X|LRFN1|CACNG7|LRFN3|LRRC4B|SLITRK1|LRRTM1|SHISA6|SHISA9	-3.2
GO Cellular Components	GO:0048786	presynaptic active zone	-5.7	ADRA2A|APBA1|ATP2B2|CDH2|GPM6A|GRM7|NECTIN1|RAB3A|STX1A|STXBP1|SYN1|PPFIA1|PPFIA3|BSN|RIMS2|ARHGAP44|ERC1|SYT11|SLC17A7|LRFN3|BRSK1|NTNG2|STX1B	-3.2
GO Cellular Components	GO:0150034	distal axon	-5.6	ABL1|ACTB|ACTG1|ADRA2A|CFL1|CHRM1|COPA|CRMP1|DSCAM|DVL1|GPM6A|GRIN1|KCNK2|KIF5C|KLC1|NEO1|NGFR|NTSR1|PENK|PNOC|PRKCG|PTPRS|NECTIN1|RAB3A|RASGRF1|SLC6A3|SNCB|THY1|CDK5R2|BRSK2|SIGMAR1|TUBB3|CPLX2|CPLX1|STMN2|ADGRL1|SIRT2|CYFIP1|NGEF|WHRN|GIT1|NDRG2|TENM2|TBC1D24|PINK1|MYH14|CPEB4|NDEL1|DTNBP1|BRSK1|PPP1R9B|NRSN1|LRRTM1	-3.1
GO Cellular Components	GO:0005912	adherens junction	-5.5	ACTB|ADD1|SHROOM2|CDH2|CDH5|CTNNA2|CTNND2|DAG1|DLG4|FLOT2|JUP|LYN|MSN|MYH9|NF2|PPP1CA|PTPRM|NECTIN1|TJP1|EZR|ZYX|PKP4|PDLIM4|PLPP3|PDLIM7|NDRG1|BAIAP2|PDLIM5|FRMD4B|PIP5K1C|CDC42EP4|CTNNA3|FRMD4A|CAMSAP3|CDH24|TMEM47|PPP1R9B|IGSF21|PARD3B|AJM1	-3
GO Cellular Components	GO:0030133	transport vesicle	-5.3	AP2A1|APBA1|APBA2|ATP6V0C|ATP6V0A1|ATP6AP1|BGN|COPA|SEPTIN1|DLG4|FGFR3|GRIN1|MAP6|NRGN|PCSK2|CDK16|PENK|SEPTIN5|PTPRN2|PTPRS|RAB3A|SLC6A9|SREBF2|STX1A|SYN1|VGF|WFS1|LAPTM5|RAB7A|USO1|AP1G2|AP1M1|BSN|SYT7|SYNGR3|SYNGR2|SYNGR1|COPB2|SNAP91|IQSEC1|YKT6|ERG28|RPH3A|SCAP|SYT11|ATP13A2|MYRIP|SYT17|SLC17A7|RAB40C|YIPF2|NRSN2|DNAJC5|NDEL1|RAB1B|DTNBP1|BRSK1|KIRREL3|ZNRF1|MCFD2|STX1B|RAB3IP|NRSN1|ATP6V0E2…	-2.8
GO Cellular Components	GO:0098685	Schaffer collateral - CA1 synapse	-5.3	ABR|ACTB|ACTG1|ADCY1|APBA1|BCR|CAPZB|CHRM1|DVL1|FYN|PPP3CA|PRKCZ|SYN1|BSN|INA|CACNG3|CACNG2|BAIAP2|CPLX1|IQSEC2|DTNBP1|NTNG2	-2.8
GO Cellular Components	GO:0008021	synaptic vesicle	-5.1	APBA1|APBA2|ATP6V0C|ATP6V0A1|ATP6AP1|SEPTIN1|DLG4|GRIN1|CDK16|PENK|SEPTIN5|PTPRN2|PTPRS|RAB3A|SLC6A9|STX1A|SYN1|WFS1|RAB7A|BSN|SYT7|SYNGR3|SYNGR2|SYNGR1|SNAP91|IQSEC1|RPH3A|SYT11|SLC17A7|RAB40C|DNAJC5|NDEL1|DTNBP1|BRSK1|KIRREL3|ZNRF1|STX1B|ATP6V0E2|SCAMP5|LGI3|SLC6A17	-2.7
GO Cellular Components	GO:0048787	presynaptic active zone membrane	-5	ADRA2A|APBA1|ATP2B2|CDH2|GPM6A|NECTIN1|STX1A|STXBP1|SYT11|LRFN3|NTNG2|STX1B	-2.6
GO Cellular Components	GO:0009898	cytoplasmic side of plasma membrane	-5	AP2A1|AP2A2|ANK1|RHOA|AP2M1|DLG4|FYN|G6PD|GM2A|GNAO1|GNAS|GNAZ|GNB1|GNG7|JUP|KIT|LYN|MYH9|NTSR1|CDK16|PPP3CA|EZR|PKP4|KCNAB2|MTSS1|C2CD2L|OSBPL2|KCNIP1|ERRFI1|RNF31|GRAMD1A|PPP1R9B|SHANK3|MTSS2|SAMD10	-2.6
GO Cellular Components	GO:0060076	excitatory synapse	-5	ATP2B2|ATP2B3|DLG4|FGFR2|GRIN1|SLC6A9|SPTBN2|BSN|CACNG3|BAIAP2|CYFIP1|SYT11|NLGN3|SLC17A7|NLGN4X|SHISA6|ELFN1	-2.6
GO Cellular Components	GO:0031252	cell leading edge	-5	ABL1|ACTB|AKT2|RHOA|ATF4|ATP2B2|DAGLA|CAPZB|CDH2|CFL1|DAG1|FLOT2|GABRA3|GABRA5|HPCA|KCNC3|KCNC4|LIMK1|MYH9|NEDD9|NF2|PAK1|PDE4A|PDE9A|PRKCZ|TWF1|PTPRM|SLC1A2|SPTBN1|THY1|TUBG1|EZR|VIM|DGKZ|PDLIM4|GBF1|KSR1|WASL|PDLIM7|BCAR1|CDC42BPB|MTSS1|ARHGAP44|SH2D3C|ARPC2|TUBB3|BAIAP2|IQGAP2|STMN2|PLXND1|FRMD4B|CYFIP1|PIP5K1C|ARHGAP45|ARFIP2|SLC39A6|PABPC1|GIT1|CTNNA3|ARHGEF4|APPL2|CTTNBP2NL|PDXP|CORO1B|EPS8…	-2.5
GO Cellular Components	GO:0098889	intrinsic component of presynaptic membrane	-4.9	ADRA2A|ATP2B2|ATP2B3|CDH2|CHRM1|CHRNB2|EPHB2|GABRA5|GPM6A|NECTIN1|SLC1A2|SLC6A1|SLC6A3|SLC6A9|STX1A|SYT7|FXYD6|CADM3|LRFN3|NTNG2|RGS7BP	-2.5
GO Cellular Components	GO:0044300	cerebellar mossy fiber	-4.9	DLG4|NFIB|CACNG2|CACNG7|LRRC4B|DAB2IP	-2.5
GO Cellular Components	GO:0070382	exocytic vesicle	-4.8	APBA1|APBA2|ATP6V0C|ATP6V0A1|ATP6AP1|SEPTIN1|DLG4|GRIN1|CDK16|PENK|SEPTIN5|PTPRN2|PTPRS|RAB3A|SLC6A9|STX1A|SYN1|WFS1|RAB7A|BSN|SYT7|SYNGR3|SYNGR2|SYNGR1|SNAP91|IQSEC1|RPH3A|SYT11|SYT17|SLC17A7|RAB40C|DNAJC5|NDEL1|DTNBP1|BRSK1|KIRREL3|ZNRF1|STX1B|RAB3IP|ATP6V0E2|SCAMP5|LGI3|SLC6A17	-2.4
GO Cellular Components	GO:0005911	cell-cell junction	-4.7	ACTB|ACTG1|ADD1|ANK2|SHROOM2|RHOA|ADGRB1|CDH2|CDH5|CTNNA2|CTNND2|DAG1|DLG4|FLOT2|JUP|KIT|LYN|MSN|MYH9|NF2|NGFR|PAK1|ABCB4|PPP1CA|PPP3CA|PRKCD|PRKCG|PRKCZ|TWF1|PTPRM|NECTIN1|SGCA|SPTBN2|TJP1|EZR|YWHAH|ZYX|PKP4|PDLIM4|PLPP3|PDLIM7|AKAP6|CDC42BPB|TRAF4|RAPGEF2|WDR1|NDRG1|BAIAP2|PDLIM5|SYNPO|SIRT2|SIPA1L3|FRMD4B|ADGRL3|SPECC1L|PIP5K1C|CDC42EP4|CLIC4|CTNNA3|UBN1|AMOTL2|USP53|FRMD4A|ASH1L|PANX2|PDXP|VA…	-2.3
GO Cellular Components	GO:0098839	postsynaptic density membrane	-4.7	ADCY1|ADRA2A|ATP2B2|DAGLA|CHRM1|DLG4|GRID1|GRIN2B|PTPRS|CLSTN3|SIGMAR1|CACNG3|CACNG2|NLGN4X|LRFN1|CACNG7|LRFN3|ABHD17A|LRRC4B|SLITRK1|SHISA6|RGS7BP|SHISA9	-2.3
GO Cellular Components	GO:0099056	integral component of presynaptic membrane	-4.6	ADRA2A|ATP2B2|ATP2B3|CDH2|CHRM1|CHRNB2|EPHB2|GABRA5|GPM6A|NECTIN1|SLC1A2|SLC6A1|SLC6A3|SLC6A9|STX1A|SYT7|FXYD6|CADM3|LRFN3	-2.2
GO Cellular Components	GO:0005938	cell cortex	-4.6	ACTB|AKT2|SHROOM2|RHOA|RHOC|RHOG|CAPZB|CDH2|CSNK1G2|DCTN1|SEPTIN1|DLG4|DYNC1H1|FGFR2|FLOT2|GRM7|KCNC3|MARCKS|MYH9|NEDD9|NF2|NUMA1|PFN1|SEPTIN5|PRKCZ|SPTAN1|SPTBN1|SPTBN2|STIM1|EZR|AXIN1|PPFIA3|BSN|WASL|RIMS2|C2CD2L|WDR1|FRY|ERC1|EXOC6B|ASTN2|CLASP1|COTL1|ARFIP2|MYRIP|NSMF|GPSM1|SPIRE1|AGTRAP|PDZD4|SPIRE2|PPP1R9B|MYADM|MTSS2|PARD3B	-2.2
GO Cellular Components	GO:0030427	site of polarized growth	-4.4	ABL1|CFL1|COPA|CRMP1|DSCAM|DVL1|GPM6A|KIF5C|KLC1|NEO1|NGFR|PTPRS|NECTIN1|RASGRF1|THY1|CDK5R2|FRY|SIGMAR1|TUBB3|STMN2|ADGRL1|SIRT2|CYFIP1|NGEF|WHRN|NDRG2|TENM2|PINK1|MYH14|CPEB4|NDEL1|DTNBP1|PPP1R9B|NRSN1|LRRTM1	-2.1
GO Cellular Components	GO:0099061	integral component of postsynaptic density membrane	-4.4	ADCY1|ADRA2A|ATP2B2|CHRM1|GRID1|PTPRS|CLSTN3|CACNG3|CACNG2|LRFN1|CACNG7|LRFN3|LRRC4B|SLITRK1|SHISA6|SHISA9	-2.1
GO Cellular Components	GO:0030426	growth cone	-4.3	ABL1|CFL1|COPA|CRMP1|DSCAM|DVL1|GPM6A|KIF5C|KLC1|NEO1|NGFR|PTPRS|NECTIN1|RASGRF1|THY1|CDK5R2|SIGMAR1|TUBB3|STMN2|ADGRL1|SIRT2|CYFIP1|NGEF|WHRN|NDRG2|TENM2|PINK1|MYH14|CPEB4|NDEL1|DTNBP1|PPP1R9B|NRSN1|LRRTM1	-2.1
GO Cellular Components	GO:0016514	SWI/SNF complex	-4.2	ACTB|SMARCA2|SMARCA4|SMARCC2|ARID1A|BCL7B|BICRA|BCL11A|ARID1B|BCL11B|ARID2	-2
GO Cellular Components	GO:0044298	cell body membrane	-4.1	ATP1A3|ATP1B2|ATP2B2|GABRA5|HPCA|KCNC3|KCNC4|SLC6A3|THY1|AMIGO1|UNC5A|DAB2IP	-1.9
GO Cellular Components	GO:0016605	PML body	-4	BLM|MTOR|HSF1|MAX|PML|RNF4|SKI|SUMO3|SUMO2|TCF7L2|UBE2I|ZBED1|N4BP1|PPARGC1A|HIPK2|UBN1|EIF4ENIF1|TENM2|TP53INP2|HMBOX1|SMC6|TRIM8|HIPK1|PATL1	-1.8
GO Cellular Components	GO:0030863	cortical cytoskeleton	-3.9	ACTB|SHROOM2|CAPZB|CDH2|DLG4|FLOT2|MYH9|NF2|NUMA1|SPTAN1|SPTBN1|SPTBN2|EZR|BSN|WASL|RIMS2|WDR1|ERC1|CLASP1|COTL1|MYRIP|NSMF|PPP1R9B|MYADM|MTSS2	-1.7
GO Cellular Components	GO:0140092	bBAF complex	-3.9	ACTB|SMARCA2|SMARCA4|SMARCC2|ARID1A|ARID1B	-1.7
GO Cellular Components	GO:0032809	neuronal cell body membrane	-3.9	ATP1A3|ATP2B2|GABRA5|HPCA|KCNC3|KCNC4|SLC6A3|THY1|AMIGO1|UNC5A|DAB2IP	-1.7
GO Cellular Components	GO:0031256	leading edge membrane	-3.8	AKT2|RHOA|ATF4|ATP2B2|DAGLA|CFL1|GABRA3|GABRA5|HPCA|KCNC3|KCNC4|NF2|PAK1|PDE4A|PDE9A|TWF1|SLC1A2|SPTBN1|THY1|EZR|KSR1|ARHGAP44|SH2D3C|PLXND1|PIP5K1C|ARHGAP45|SLC39A6|ARHGEF4|APPL2|PDXP|EPS8L2|PPP1R9B|UNC5A|MTSS2|SHISA6|SHISA9	-1.6
GO Cellular Components	GO:0030672	synaptic vesicle membrane	-3.7	ATP6V0C|ATP6V0A1|ATP6AP1|PTPRN2|PTPRS|RAB3A|SLC6A9|STX1A|SYN1|WFS1|RAB7A|BSN|SYT7|SYNGR3|SYNGR2|SYNGR1|RPH3A|SLC17A7|DNAJC5|DTNBP1|ZNRF1|ATP6V0E2|SCAMP5|SLC6A17	-1.6
GO Cellular Components	GO:0099501	exocytic vesicle membrane	-3.7	ATP6V0C|ATP6V0A1|ATP6AP1|PTPRN2|PTPRS|RAB3A|SLC6A9|STX1A|SYN1|WFS1|RAB7A|BSN|SYT7|SYNGR3|SYNGR2|SYNGR1|RPH3A|SLC17A7|DNAJC5|DTNBP1|ZNRF1|ATP6V0E2|SCAMP5|SLC6A17	-1.6
GO Cellular Components	GO:0098562	cytoplasmic side of membrane	-3.6	AP2A1|AP2A2|ANK1|RHOA|AP2M1|DLG4|FYN|G6PD|GM2A|GNAO1|GNAS|GNAZ|GNB1|GNG7|JUP|KIT|LYN|MYH9|NTSR1|CDK16|PPP3CA|RPS26|EZR|PKP4|KCNAB2|MTSS1|C2CD2L|OSBPL2|KCNIP1|ERRFI1|RNF31|GRAMD1A|PPP1R9B|SHANK3|MTSS2|SAMD10	-1.5
GO Cellular Components	GO:0031594	neuromuscular junction	-3.5	ACHE|DLG4|NRG1|LAMB2|LRP4|MYH9|PRKAR1A|SPOCK1|TUBA1A|SYNGR3|SYNGR2|SYNGR1|DLGAP4|TBC1D24|DLGAP3|DNAJC5|STX1B	-1.4
GO Cellular Components	GO:0071565	nBAF complex	-3.4	ACTB|SMARCA2|SMARCA4|SMARCC2|ARID1A|SS18L1|ARID1B	-1.3
GO Cellular Components	GO:0001931	uropod	-3.2	FLOT2|MSN|MYH9|SELPLG|EZR|PIP5K1C	-1.2
GO Cellular Components	GO:0031254	cell trailing edge	-3.2	FLOT2|MSN|MYH9|SELPLG|EZR|PIP5K1C	-1.2
GO Cellular Components	GO:0031225	anchored component of membrane	-3.2	ACHE|ALPL|ART1|CNTFR|DLG4|GFRA1|GFRA2|LY6E|LY6H|MMP17|NCAM1|RAB3A|SYN1|THY1|RAB7A|NTM|NRN1|RGMA|LYNX1|DNAJC5|ABHD17A|NTNG2|IGSF21|RGMB|RGS7BP	-1.2
GO Cellular Components	GO:0098945	intrinsic component of presynaptic active zone membrane	-3.2	ADRA2A|ATP2B2|CDH2|GPM6A|NECTIN1|LRFN3|NTNG2	-1.2
GO Cellular Components	GO:0008303	caspase complex	-3.1	CAPNS1|CASP9|GPAA1|PIGT|PIGU	-1.1
GO Cellular Components	GO:0098982	GABA-ergic synapse	-3	ADRA2A|ATP2B2|ATP2B3|DAG1|GABRA3|GABRA5|GABRB2|NRG1|SLC6A1|BSN|CLSTN3|NLGN3|NLGN4X|SLITRK1|LRRTM1|SLC6A17|IQSEC3	-1
GO Cellular Components	GO:0099059	integral component of presynaptic active zone membrane	-3	ADRA2A|ATP2B2|CDH2|GPM6A|NECTIN1|LRFN3	-1
GO Cellular Components	GO:0071564	npBAF complex	-3	ACTB|SMARCA2|SMARCA4|SMARCC2|ARID1A|ARID1B	-1
GO Cellular Components	GO:0005775	vacuolar lumen	-2.9	ARSA|ARSB|BGN|C3|TPP1|CTSD|DCN|CYB5R3|DYNC1H1|GM2A|GRN|IDUA|MAN2B1|CTSA|PRKCD|DNAJC3|SDC4|SMPD1|TCN2|SDC3|TUBB4B|KERA|ATP13A2|ARHGAP45|PLD3|NSG1|DPP7|PLBD2|TUBB	-0.94
GO Cellular Components	GO:0099031	anchored component of postsynaptic density membrane	-2.8	DLG4|ABHD17A|RGS7BP	-0.94
GO Cellular Components	GO:0099030	anchored component of postsynaptic specialization membrane	-2.8	DLG4|ABHD17A|RGS7BP	-0.94
GO Cellular Components	GO:0032590	dendrite membrane	-2.8	ATF4|ATP2B2|DAGLA|GABRA3|GABRA5|HPCA|KCNC3|KCNC4|THY1|PPP1R9B|SHISA6|SHISA9	-0.94
GO Cellular Components	GO:0032280	symmetric synapse	-2.8	NTSR1|PENK|NLGN3|NLGN4X|IQSEC3	-0.93
GO Cellular Components	GO:1990752	microtubule end	-2.8	DCTN1|NUMA1|RNF4|CLIP2|MAPRE2|CLASP1|CLIP3|SLAIN2|CAMSAP3|CAMSAP1	-0.93
GO Cellular Components	GO:0032589	neuron projection membrane	-2.8	ATF4|ATP2B2|DAGLA|GABRA3|GABRA5|HPCA|KCNC3|KCNC4|SLC1A2|SPTBN1|THY1|PPP1R9B|UNC5A|SHISA6|SHISA9	-0.93
GO Cellular Components	GO:0019898	extrinsic component of membrane	-2.8	RHOA|KIF1A|CDH2|CDH4|CDH5|CNTFR|CTNNA2|DLG4|FYN|GFRA1|GFRA2|GNAO1|GNAS|GNAZ|GNB1|GNG7|HPCA|JUP|LYN|MFGE8|NUMA1|CDK16|PIK3R2|PML|PPP3CA|SYN1|TRIO|UVRAG|EZR|RAB7A|ULK1|KCNAB2|OSBPL2|SNAP91|RPH3A|ATG2A|KCNIP1|ERRFI1|VAC14|WDR45B|GRAMD1A|CDH24|NOA1|CCDC115|SHANK3|ARHGEF25|HID1	-0.93
GO Cellular Components	GO:0042641	actomyosin	-2.8	MYH6|MYH9|PRKCZ|STX1A|TPM3|ZYX|PDLIM4|PDLIM7|BAG3|CDC42BPB|NEBL|PDLIM5|SYNPO|SIPA1L3|CORO1B|MYH14|MYO18A	-0.92
GO Cellular Components	GO:0044304	main axon	-2.7	DAGLA|DAG1|DLG4|KCNQ2|KCNQ3|MAP1A|SLC1A2|SPOCK1|SPTBN1|THY1|KCNAB2|TUBB4A|SIRT2|TRIM46	-0.9
GO Cellular Components	GO:0008076	voltage-gated potassium channel complex	-2.7	HCN2|CALM1|DPP6|KCNC3|KCNC4|KCNG1|KCNH2|KCNK1|KCNK2|KCNN1|KCNQ2|KCNQ3|KCNAB2|KCNV1|KCNIP3|KCNIP1	-0.87
GO Cellular Components	GO:0097427	microtubule bundle	-2.7	MARK2|NUMA1|TPPP3|ATAT1	-0.86
GO Cellular Components	GO:0043202	lysosomal lumen	-2.6	ARSA|ARSB|BGN|TPP1|CTSD|DCN|GM2A|IDUA|MAN2B1|CTSA|SDC4|SMPD1|TCN2|SDC3|KERA|ATP13A2|PLD3|NSG1|PLBD2	-0.82
GO Cellular Components	GO:0043204	perikaryon	-2.6	ASTN1|CRMP1|CTNND2|DMWD|HPCA|KCNC3|KCNK1|NGFR|NTSR1|PCSK2|PDE9A|PENK|PPP1CA|PTPRS|CPLX2|CPLX1|SYNPO|SIRT2|NCDN|SYT11|ASTN2|NSMF|AMIGO1|CPNE5|KNDC1|RGS7BP	-0.8
GO Cellular Components	GO:0044305	calyx of Held	-2.6	ACTB|ACTG1|KCNK2|PRKCG|CPLX2|CPLX1|GIT1	-0.8
GO Cellular Components	GO:0034045	phagophore assembly site membrane	-2.6	RAB7A|ULK1|ULK2|ATG2A|WDR45B|ATG9A|RAB1B	-0.8
GO Cellular Components	GO:0030658	transport vesicle membrane	-2.6	AP2A1|ATP6V0C|ATP6V0A1|ATP6AP1|MAP6|NRGN|PTPRN2|PTPRS|RAB3A|SLC6A9|SREBF2|STX1A|SYN1|WFS1|RAB7A|USO1|AP1G2|AP1M1|BSN|SYT7|SYNGR3|SYNGR2|SYNGR1|RPH3A|SCAP|SLC17A7|DNAJC5|DTNBP1|ZNRF1|MCFD2|ATP6V0E2|SCAMP5|SLC6A17|PEF1	-0.8
GO Cellular Components	GO:0098563	intrinsic component of synaptic vesicle membrane	-2.5	PTPRS|RAB3A|SLC6A9|STX1A|SYN1|WFS1|RAB7A|SYNGR1|SLC17A7|DNAJC5|SLC6A17	-0.72
GO Cellular Components	GO:0070603	SWI/SNF superfamily-type complex	-2.4	ACTB|SMARCA2|SMARCA4|SMARCC2|ARID1A|MBD2|MTA1|BCL7B|MYBBP1A|SRCAP|SS18L1|BICRA|BCL11A|GATAD2A|ARID1B|MTA3|BCL11B|ARID2	-0.63
GO Cellular Components	GO:0030027	lamellipodium	-2.4	ACTB|RHOA|CAPZB|CDH2|CFL1|DAG1|FLOT2|LIMK1|NEDD9|NF2|PAK1|PTPRM|DGKZ|PDLIM4|WASL|BCAR1|CDC42BPB|ARPC2|TUBB3|BAIAP2|IQGAP2|STMN2|PLXND1|CYFIP1|SLC39A6|PABPC1|GIT1|CTNNA3|CTTNBP2NL|PDXP|CORO1B|PPP1R9B|MTSS2|RAB3IP	-0.63
GO Cellular Components	GO:0032591	dendritic spine membrane	-2.4	ATP2B2|DAGLA|KCNC3|PPP1R9B|SHISA6|SHISA9	-0.63
GO Cellular Components	GO:0098981	cholinergic synapse	-2.4	CHRM1|CHRNB2|DLGAP4|DLGAP3	-0.63
GO Cellular Components	GO:0044327	dendritic spine head	-2.4	HPCA|NRGN|PPP1R9B|RGS7BP	-0.63
GO Cellular Components	GO:0000306	extrinsic component of vacuolar membrane	-2.3	RAB7A|ULK1|VAC14	-0.59
GO Cellular Components	GO:0008287	protein serine/threonine phosphatase complex	-2.2	PPP1CA|PPP1CC|PPP1R10|PPP2R2B|PPP2R2C|PPP2R5B|PPP2R5D|PPP3CA|PPP1R15A|PPP2R3B|PPP2R2D|PPP1R9B	-0.54
GO Cellular Components	GO:0035371	microtubule plus-end	-2.2	DCTN1|NUMA1|CLIP2|MAPRE2|CLASP1|CLIP3|SLAIN2	-0.53
GO Cellular Components	GO:1904949	ATPase complex	-2.2	ACTB|SMARCA2|SMARCA4|SMARCC2|ARID1A|MBD2|MTA1|BCL7B|MYBBP1A|SRCAP|SS18L1|BICRA|BCL11A|GATAD2A|ARID1B|MTA3|BCL11B|ARID2	-0.5
GO Cellular Components	GO:0099524	postsynaptic cytosol	-2.1	DAG1|HTT|PLCB3|PRKCG|BAIAP2	-0.5
GO Cellular Components	GO:0035060	brahma complex	-2.1	ACTB|SMARCA2|SMARCC2|ARID1A|ARID1B	-0.5
GO Cellular Components	GO:0140288	GBAF complex	-2.1	ACTB|SMARCA2|SMARCA4|BCL7B|BICRA	-0.5
GO Cellular Components	GO:0032587	ruffle membrane	-2.1	AKT2|RHOA|CFL1|NF2|PAK1|PDE4A|PDE9A|TWF1|EZR|KSR1|SH2D3C|PIP5K1C|ARHGAP45|ARHGEF4|APPL2|PDXP|EPS8L2|PPP1R9B|MTSS2	-0.5
GO Cellular Components	GO:0030128	clathrin coat of endocytic vesicle	-2.1	AP2A1|AP2A2|AP2M1|EPN2	-0.48
GO Cellular Components	GO:0000159	protein phosphatase type 2A complex	-2.1	PPP2R2B|PPP2R2C|PPP2R5B|PPP2R5D|PPP2R3B|PPP2R2D	-0.47
GO Cellular Components	GO:1903293	phosphatase complex	-2.1	PPP1CA|PPP1CC|PPP1R10|PPP2R2B|PPP2R2C|PPP2R5B|PPP2R5D|PPP3CA|PPP1R15A|PPP2R3B|PPP2R2D|PPP1R9B	-0.47
GO Cellular Components	GO:0034705	potassium channel complex	-2.1	HCN2|CALM1|DPP6|KCNC3|KCNC4|KCNG1|KCNH2|KCNK1|KCNK2|KCNN1|KCNQ2|KCNQ3|KCNAB2|KCNV1|KCNIP3|KCNIP1	-0.46
GO Cellular Components	GO:0019897	extrinsic component of plasma membrane	-2	RHOA|CDH2|CDH4|CDH5|CTNNA2|DLG4|FYN|GNAO1|GNAS|GNAZ|GNB1|GNG7|JUP|LYN|MFGE8|NUMA1|CDK16|PPP3CA|KCNAB2|OSBPL2|SNAP91|KCNIP1|ERRFI1|GRAMD1A|CDH24|SHANK3	-0.46
GO Cellular Components	GO:0044306	neuron projection terminus	-2	ACTB|ACTG1|ADRA2A|CHRM1|DLG4|GRIN1|KCNK2|NTSR1|PENK|PNOC|PRKCG|RAB3A|SLC1A2|SLC6A3|SNCB|BSN|BAIAP2|CPLX2|CPLX1|CYFIP1|GIT1|TBC1D24	-0.44
GO Cellular Components	GO:0097517	contractile actin filament bundle	-2	MYH6|MYH9|PRKCZ|TPM3|ZYX|PDLIM4|PDLIM7|BAG3|NEBL|PDLIM5|SYNPO|SIPA1L3|CORO1B|MYH14	-0.43
GO Cellular Components	GO:0001725	stress fiber	-2	MYH6|MYH9|PRKCZ|TPM3|ZYX|PDLIM4|PDLIM7|BAG3|NEBL|PDLIM5|SYNPO|SIPA1L3|CORO1B|MYH14	-0.43
GO Molecular Functions	GO:0003713	transcription coactivator activity	-6.7	ABL1|BCL3|CREBBP|DTX1|GPS2|HCFC1|HMGA1|PRMT2|JUP|NPM1|PHF2|RNF4|SMARCA2|SMARCA4|SMARCC2|TAF6|ARID1A|NCOA1|AIP|MTA1|DYRK1B|ZBED1|MED26|MED27|MAGED1|MED24|MED16|CITED2|CARM1|NCOA2|SRCAP|PPARGC1A|PMF1|NCOA6|CAMTA2|USP22|BRD4|SIN3A|SS18L1|USP21|TOX3|HIPK2|TRIM62|MAML3|ZMIZ1|ARID1B|MTA3|MRTFA|CCAR2|MMS19|TRIM8|ZMIZ2|MAML2|TADA2B|BCL9L	-4
GO Molecular Functions	GO:0019901	protein kinase binding	-6.7	ABL1|ACTB|ADRA2A|AP2A1|AP2A2|ANK2|RHOA|RHOC|RHOG|ATF4|CALM1|CASP9|CCND2|CCND3|CDH2|CDH5|CDKN1A|CDKN2D|ACE|DCTN1|DLG4|DNM1|DSCAM|DUSP1|DVL1|EEF2|GAS6|GOLGA2|GSK3B|NRG1|HIF1A|PRMT1|HSF1|IRAK1|JUP|LRP4|MARCKS|MEF2A|MAP3K5|MSN|ND2|MYH6|NEDD9|NPM1|PIK3R2|PPP1CC|PKIA|PRKAR1A|PRKCD|PRKCZ|MAPK4|MAPK6|DNAJC3|RARA|SDC4|SKI|SOX9|STXBP1|SYN1|TCF7L2|TGFBR2|THY1|TUBA4A|EZR|WARS1|ZFP36|AXIN1|NCK2|CPNE3|CDK5R2|B…	-4
GO Molecular Functions	GO:0019900	kinase binding	-6	ABL1|ACTB|ADRA2A|AP2A1|AP2A2|ANK2|RHOA|RHOC|RHOG|ATF4|CALM1|CASP9|CCND2|CCND3|CDH2|CDH5|CDKN1A|CDKN2D|ACE|DCTN1|DLG4|DNM1|DSCAM|DUSP1|DVL1|EEF2|GAS6|GOLGA2|GSK3B|HTT|NRG1|HIF1A|HPCA|PRMT1|HSF1|IRAK1|JUP|LRP4|MARCKS|MEF2A|MAP3K5|MSN|ND2|MYH6|NEDD9|NPM1|PER1|PIK3R2|PPP1CC|PKIA|PRKAR1A|PRKCD|PRKCZ|MAPK4|MAPK6|DNAJC3|RARA|SDC4|SKI|SOX9|STX1A|STXBP1|SYN1|TCF7L2|TGFBR2|THY1|TUBA4A|EZR|WARS1|ZFP36|AXIN1…	-3.4
GO Molecular Functions	GO:0003712	transcription coregulator activity	-5.4	ABL1|TLE5|BCL3|CREBBP|DTX1|GPS2|HCFC1|NRG1|HMGA1|PRMT2|JUP|MECP2|MAP3K10|NPM1|PHF2|RNF4|SMARCA2|SMARCA4|SMARCC2|MED22|TAF6|TBL1X|ARID1A|CBX4|NCOA1|AIP|MTA1|DYRK1B|ZBED1|MED26|MED27|MAGED1|NCOR1|NCOR2|MED24|MED16|TOB1|CITED2|CARM1|NCOA2|MYBBP1A|TOB2|SRCAP|PPARGC1A|PMF1|NCOA6|CAMTA2|CAMTA1|SIN3B|USP22|MED13L|BRD4|SIN3A|SS18L1|USP21|TOX3|HIPK2|LMCD1|MED15|KDM3B|AKIRIN2|TRIM62|MAML3|MED29|ZMIZ1|ARID1…	-2.9
GO Molecular Functions	GO:0005200	structural constituent of cytoskeleton	-5	ACTB|ACTG1|ANK1|ANK2|CTNNA2|MSN|PLEC|SPTAN1|SPTBN1|SPTBN2|TUBA4A|TUBG1|VIM|TUBA1A|INA|ARPC2|SORBS3|TUBB3|TUBB4A|TUBB4B|TUBA8|TUBB	-2.5
GO Molecular Functions	GO:0050839	cell adhesion molecule binding	-4.5	ADD1|ARHGAP1|BSG|CAPZB|CDH2|CDH4|CDH5|COL3A1|CTNNA2|CTNND2|DSCAM|EEF2|MARK2|EPS15|FBLN1|FASN|GFRA1|GOLGA2|HCFC1|NRG1|IGF2|ITGA6|JUP|LAMB2|BCAM|LYN|MFGE8|MSN|MYH9|NF2|NOTCH3|PFKP|PFN1|PI4KA|PKM|PLCB3|PLEC|PPP1CA|TWF1|PTPRM|NECTIN1|RPS26|SH3GL1|SPTAN1|SPTBN1|SPTBN2|THY1|TJP1|EZR|VWF|PKP4|PLPP3|USO1|S1PR2|ITGBL1|NRXN3|NRXN1|BAG3|NDRG1|BAIAP2|PDLIM5|YKT6|EHD1|ADGRL1|EPN2|ERC1|ARFIP2|CTNNA3|SH3GLB1|PP…	-2.2
GO Molecular Functions	GO:0045296	cadherin binding	-4.4	ADD1|ARHGAP1|BSG|CAPZB|CDH2|CDH4|CDH5|CTNNA2|CTNND2|EEF2|MARK2|EPS15|FASN|GOLGA2|HCFC1|ITGA6|JUP|MYH9|NOTCH3|PFKP|PFN1|PI4KA|PKM|PLCB3|PLEC|PPP1CA|TWF1|PTPRM|RPS26|SH3GL1|SPTAN1|SPTBN1|SPTBN2|TJP1|EZR|PKP4|USO1|BAG3|NDRG1|BAIAP2|PDLIM5|YKT6|EHD1|EPN2|ERC1|ARFIP2|CTNNA3|SH3GLB1|PPME1|CC2D1A|PAK6|CORO1B|SCYL1|CDH24|EPS8L2|KLC2|EIF2A|DAB2IP	-2.1
GO Molecular Functions	GO:0008013	beta-catenin binding	-3.7	SHROOM2|CDH2|CDH5|CTNNA2|CTNND2|DVL1|DVL3|GSK3B|SOX9|TBL1X|TCF7L2|AXIN1|SETD1A|CARM1|CTNNA3|LEF1|DACT1|CTNNBIP1|CHD8|TCF7L1|BCL9L	-1.6
GO Molecular Functions	GO:0003779	actin binding	-3.7	ABL1|ADD1|SHROOM2|CAMK2B|CAPZB|CFL1|CTNNA2|DAG1|EPB41L1|FLII|HPCA|MARCKS|MAP1A|MSN|MYH6|MYH9|NF2|PFN1|PLEC|TWF1|SPTAN1|SPTBN1|SPTBN2|SYN1|TNS1|TPM2|TPM3|EZR|YWHAH|PDLIM4|CDK5R2|WASL|PDLIM7|BCL7B|MTSS1|WDR1|ARPC2|CORO2B|NEBL|PDLIM5|IQGAP2|TRIOBP|SYNPO|CYFIP1|COTL1|RUSC1|MYRIP|CTNNA3|MYO3A|MAP1S|SPIRE1|CORO1B|MRTFA|CAMSAP3|VPS16|EPS8L2|MARCKSL1|MYH14|CLMN|ABLIM2|SPIRE2|PPP1R9B|SHANK3|SSH2|MTSS2|PHA…	-1.5
GO Molecular Functions	GO:0050321	tau-protein kinase activity	-3.6	MARK2|FYN|GSK3B|MARK1|BRSK2|SIK3|MARK4|BRSK1|TTBK1	-1.5
GO Molecular Functions	GO:0070016	armadillo repeat domain binding	-3.5	TCF7L2|AXIN1|STRN4|LEF1|CTNNBIP1|CHD8	-1.4
GO Molecular Functions	GO:0002039	p53 binding	-3.3	BLM|PTTG1IP|CREBBP|GSK3B|HTT|HIF1A|SMARCA4|STK11|AXIN1|NUAK1|EHMT2|PPP1R13B|BRD4|NOP53|CHD8|ZNF385B	-1.2
GO Molecular Functions	GO:0034235	GPI anchor binding	-3.1	THY1|GPAA1|MPPE1|PIGU	-1.1
GO Molecular Functions	GO:0051015	actin filament binding	-2.9	ABL1|ADD1|SHROOM2|CAPZB|CFL1|CTNNA2|FLII|MARCKS|MYH6|MYH9|TWF1|SPTAN1|SPTBN1|SPTBN2|TPM2|TPM3|EZR|WDR1|ARPC2|CORO2B|NEBL|IQGAP2|TRIOBP|CYFIP1|COTL1|CTNNA3|MAP1S|CORO1B|CAMSAP3|VPS16|MARCKSL1|MYH14|CLMN|ABLIM2|PPP1R9B|MYO18A	-1
GO Molecular Functions	GO:0030295	protein kinase activator activity	-2.8	CALM1|CDKN1A|MARK2|GAS6|NRG1|IGF2|RPLP1|STK11|MADD|CDK5R2|MAP3K13|DAZAP2|RGCC|ANGPT4|RPTOR|MLST8|WNK1|AGAP2|MOB3A|CCNYL1|DAB2IP	-0.94
GO Molecular Functions	GO:0001002	RNA polymerase III type 1 promoter sequence-specific DNA binding	-2.8	MTOR|RPTOR|MAF1	-0.94
GO Molecular Functions	GO:0080084	5S rDNA binding	-2.8	MTOR|RPTOR|MAF1	-0.94
GO Molecular Functions	GO:0001003	RNA polymerase III type 2 promoter sequence-specific DNA binding	-2.8	MTOR|RPTOR|MAF1	-0.94
GO Molecular Functions	GO:0098973	structural constituent of postsynaptic actin cytoskeleton	-2.8	ACTB|ACTG1|INA	-0.94
GO Molecular Functions	GO:0005516	calmodulin binding	-2.8	ADCY1|ADD1|ATP2B2|ATP2B3|CAMK2A|CAMK2B|GRIN1|ITPKA|KCNN1|KCNQ2|KCNQ3|MARCKS|MAP6|MYH6|MYH9|NGFR|NRGN|PCNT|PLCB3|PPP3CA|SPTAN1|SPTBN1|TJP1|WFS1|SYT7|IQGAP2|UBR4|STRN4|MYO3A|CAMSAP3|MARCKSL1|MYH14|CAMSAP1	-0.94
GO Molecular Functions	GO:0033130	acetylcholine receptor binding	-2.8	DLG4|LY6E|LY6H|NRXN1|LYNX1	-0.93
GO Molecular Functions	GO:0008526	phosphatidylinositol transfer activity	-2.8	PLTP|PITPNM1|C2CD2L|OSBPL2|PITPNM2	-0.93
GO Molecular Functions	GO:0070300	phosphatidic acid binding	-2.8	MARK1|NRGN|PLTP|PITPNM1|RAPGEF2|ATP13A2|SMPD3	-0.93
GO Molecular Functions	GO:0098918	structural constituent of synapse	-2.8	ACTB|ACTG1|DLG4|SPTBN2|BSN|INA|ERC1	-0.93
GO Molecular Functions	GO:0030276	clathrin binding	-2.8	AP2A1|AP2A2|AP2M1|GAK|LRP1|AP1G2|AP1M1|SYT7|SNAP91|EPN2|SYT11|NSG1|CALY|SYT17|LMBRD1|TOM1L2	-0.93
GO Molecular Functions	GO:0048156	tau protein binding	-2.7	ACTB|APOE|DCTN1|MARK2|FYN|GSK3B|MAP1A|MARK1|BRSK2|MARK4|BRSK1|TTBK1	-0.89
GO Molecular Functions	GO:0035254	glutamate receptor binding	-2.7	ATP2B2|CAMK2A|DLG4|FYN|GNAS|ND2|RASGRF1|CACNG3|CACNG2|SHANK3|SHISA6	-0.87
GO Molecular Functions	GO:0034481	chondroitin sulfotransferase activity	-2.7	CHST11|CHST12|CHST7|CHST13	-0.86
GO Molecular Functions	GO:0019209	kinase activator activity	-2.6	CALM1|CDKN1A|MARK2|GAS6|NRG1|IGF2|RPLP1|STK11|MADD|CDK5R2|MAP3K13|DAZAP2|RGCC|ANGPT4|RPTOR|MLST8|WNK1|AGAP2|MOB3A|CCNYL1|DAB2IP	-0.75
GO Molecular Functions	GO:0019887	protein kinase regulator activity	-2.5	CALM1|CCND2|CCND3|CDKN1A|CDKN2D|CSNK2B|MARK2|GAS6|NRG1|IGF2|NPM1|PKIA|PRKAR1A|DNAJC3|RPLP1|STK11|MADD|CDK5R2|MAP3K13|SH3BP5|DAZAP2|TRIB1|CCNI|RGCC|ANGPT4|RPTOR|MLST8|WNK1|SH3BP5L|ITPRIP|AGAP2|MOB3A|CCNYL1|DAB2IP	-0.74
GO Molecular Functions	GO:0051010	microtubule plus-end binding	-2.5	DCTN1|NUMA1|STIM1|CLIP2|MAPRE2|CLASP1|CLIP3	-0.68
GO Molecular Functions	GO:0031628	opioid receptor binding	-2.4	GNAO1|GNAS|PENK|PNOC	-0.63
GO Molecular Functions	GO:0035255	ionotropic glutamate receptor binding	-2.3	DLG4|GNAS|ND2|CACNG3|CACNG2|SHANK3|SHISA6	-0.61
GO Molecular Functions	GO:0019903	protein phosphatase binding	-2.3	ANK1|CDH2|CDH5|CSF1R|DLG4|JAK1|JUP|MAP3K5|PIK3R2|PPP1CA|PPP1CC|PPP1R10|SLC6A3|PDLIM4|PPP6R2|SMG7|MVP|PPP6R1|PPP1R15A|STRN4|PPME1|CTTNBP2NL|PPP1R9B|PHACTR3|SIRPA|DAB2IP	-0.59
GO Molecular Functions	GO:0030550	acetylcholine receptor inhibitor activity	-2.3	LY6E|LY6H|LYNX1	-0.59
GO Molecular Functions	GO:0016215	acyl-CoA desaturase activity	-2.3	FADS1|FADS2|SCD5	-0.59
GO Molecular Functions	GO:0047756	chondroitin 4-sulfotransferase activity	-2.3	CHST11|CHST12|CHST13	-0.59
GO Molecular Functions	GO:0019888	protein phosphatase regulator activity	-2.2	CALM1|PPP1R10|PPP2R2B|PPP2R2C|PPP2R5B|PPP2R5D|PPP6R2|PPP6R1|CABIN1|PPP1R15A|B3GAT3|PPP2R3B|PPME1|PPP2R2D|PPP1R9B|PHACTR3|ELFN1	-0.57
GO Molecular Functions	GO:0001221	transcription coregulator binding	-2.2	BCL6|CREBBP|EPAS1|HIF1A|HMGA1|JUND|NFE2L2|PER1|PPARD|RARA|SMARCA4|UBE2I|ZBTB17|USP11|NR1D1|BAIAP2|EHMT2|LEF1|PHF12|WIZ	-0.54
GO Molecular Functions	GO:1990782	protein tyrosine kinase binding	-2.2	CDH5|DSCAM|GAS6|NRG1|LRP4|NEDD9|PIK3R2|NCK2|CPNE3|PITPNM1|PHYHIP|DAZAP2|GAB2|TOB1|SH2B2|ANGPT4|PITPNM2|SIRPA	-0.5
GO Molecular Functions	GO:0019207	kinase regulator activity	-2.1	CALM1|CCND2|CCND3|CDKN1A|CDKN2D|CSNK2B|MARK2|GAS6|NRG1|IGF2|NPM1|PIK3R2|PKIA|PRKAR1A|DNAJC3|RPLP1|STK11|WARS1|MADD|CDK5R2|MAP3K13|SH3BP5|DAZAP2|TRIB1|CCNI|RGCC|ANGPT4|RPTOR|MLST8|WNK1|SH3BP5L|ITPRIP|AGAP2|MOB3A|CCNYL1|DAB2IP	-0.5
GO Molecular Functions	GO:0000182	rDNA binding	-2.1	MTOR|DHX33|RPTOR|MAF1	-0.48
GO Molecular Functions	GO:0004897	ciliary neurotrophic factor receptor activity	-2.1	CNTFR|IL6ST|IL13RA1|OSMR	-0.48
GO Molecular Functions	GO:0097110	scaffold protein binding	-2.1	ADCY5|DLG4|FYN|IL6ST|KCNH2|LRP4|LYN|VIM|NCK2|CACNA1G|BAIAP2|NLGN3|NLGN4X|SHANK3	-0.47
GO Molecular Functions	GO:0001540	amyloid-beta binding	-2.1	ACHE|APBA1|APBA2|APOE|ATP1A3|CD36|SCARB1|CST3|EPHB2|GRIN1|GRIN2B|LRP1|NGFR|CLSTN3|CLSTN1|DLGAP3	-0.46
KEGG Pathway	hsa04261	Adrenergic signaling in cardiomyocytes	-5.5	ADCY1|ADCY2|ADCY5|ADRA1D|AGT|AKT2|ATF4|ATP1A3|ATP1B2|ATP2A1|ATP2B2|ATP2B3|CALM1|CAMK2A|CAMK2B|ATF6B|GNAS|KCNK2|MYH6|PLCB3|PPP1CA|PPP1CC|PPP2R2B|PPP2R2C|PPP2R5B|PPP2R5D|TPM2|TPM3|CACNG3|CACNG2|PPP2R3B|PPP2R2D|CACNG7|CACNG6|CALML6	-3
KEGG Pathway	hsa04919	Thyroid hormone signaling pathway	-4.1	ACTB|ACTG1|AKT2|ATP1A3|ATP1B2|ATP2A1|BMP4|CASP9|CREBBP|MTOR|GSK3B|HIF1A|MYH6|NOTCH2|NOTCH3|PFKP|PIK3R2|PLCB3|PRKCG|TSC2|NCOA1|MED27|NCOR1|MED24|MED16|NCOA2|MED13L|SIN3A	-2
KEGG Pathway	hsa04728	Dopaminergic synapse	-4	ADCY5|AKT2|ATF4|CALM1|CAMK2A|CAMK2B|ATF6B|GNAO1|GNAS|GNB1|GNG7|GRIN2B|GSK3B|KIF5C|PLCB3|PPP1CA|PPP1CC|PPP2R2B|PPP2R2C|PPP2R5B|PPP2R5D|PPP3CA|PRKCG|SLC6A3|PPP2R3B|CALY|PPP2R2D|CALML6	-2
KEGG Pathway	hsa04971	Gastric acid secretion	-3.9	ACTB|ACTG1|ADCY1|ADCY2|ADCY5|ATP1A3|ATP1B2|CA2|CALM1|CAMK2A|CAMK2B|GNAS|KCNK2|PLCB3|PRKCG|SST|EZR|CALML6	-2
KEGG Pathway	hsa05415	Diabetic cardiomyopathy	-3.8	AGT|AKT2|SLC25A5|ATP2A1|CAMK2A|CAMK2B|CD36|COL3A1|CTSD|ACE|MTOR|G6PD|GSK3B|MMP2|ATP6|COX1|COX2|ND1|ND2|ND4|ND5|ND6|NDUFS8|NDUFV3|PDHA1|PDK2|PIK3R2|PLCB3|PPP1CA|PPP1CC|PRKCD|PRKCG|PRKCZ|SDHA|SDHC|TGFB1|TGFBR2|UQCRC1	-2
KEGG Pathway	hsa05012	Parkinson disease	-3.8	ADCY5|SLC25A5|ATF4|CALM1|CAMK2A|CAMK2B|CASP9|DUSP1|GNAS|GPR37|KIF5C|KLC1|MAP3K5|ATP6|COX1|COX2|ND1|ND2|ND4|ND5|ND6|NDUFS8|NDUFV3|NFE2L2|SEPTIN5|PSMB1|SDHA|SDHC|SLC6A3|TUBA4A|UQCRC1|TUBA1A|KEAP1|MFN2|TUBB3|TUBB4A|TUBB4B|SLC39A6|TXN2|SLC39A3|TUBA8|KLC2|PINK1|CALML6|TUBB	-2
KEGG Pathway	hsa04721	Synaptic vesicle cycle	-3.7	AP2A1|AP2A2|ATP6V0C|ATP6V0A1|AP2M1|DNM1|RAB3A|SLC1A2|SLC6A1|SLC6A3|SLC6A9|STX1A|STXBP1|NAPA|CPLX2|CPLX1|SLC17A7|STX1B|ATP6V0E2	-2
KEGG Pathway	hsa05016	Huntington disease	-3.6	AP2A1|AP2A2|SLC25A5|CASP9|AP2M1|CREBBP|DCTN1|DLG4|MTOR|GRIN1|GRIN2B|HTT|KIF5C|KLC1|MAP3K5|MAP3K10|ATP6|COX1|COX2|ND1|ND2|ND4|ND5|ND6|NDUFS8|NDUFV3|PLCB3|POLR2E|PSMB1|SDHA|SDHC|SLC1A2|STX1A|TGM2|TUBA4A|UQCRC1|TUBA1A|ULK1|ULK2|TUBB3|TUBB4A|TUBB4B|DCTN6|PPARGC1A|ATG2A|SIN3A|TUBA8|KLC2|TUBB	-2
KEGG Pathway	hsa04925	Aldosterone synthesis and secretion	-3.5	ADCY1|ADCY2|ADCY5|AGT|ATF4|ATP1A3|ATP1B2|ATP2B2|ATP2B3|DAGLA|CALM1|CAMK2A|CAMK2B|SCARB1|ATF6B|GNAS|LIPE|PLCB3|PRKCG|CACNA1G|CALML6	-1.9
KEGG Pathway	hsa04520	Adherens junction	-3.2	ACTB|ACTG1|RHOA|CREBBP|CSNK2B|CTNNA2|FGFR1|FYN|PTPRM|NECTIN1|TCF7L2|TGFBR2|TJP1|WASL|BAIAP2|CTNNA3|LEF1|TCF7L1	-1.7
KEGG Pathway	hsa05031	Amphetamine addiction	-3.2	ADCY5|ATF4|CALM1|CAMK2A|CAMK2B|ATF6B|GNAS|GRIN1|GRIN2B|PPP1CA|PPP1CC|PPP3CA|PRKCG|SLC6A3|STX1A|CALML6	-1.7
KEGG Pathway	hsa04916	Melanogenesis	-3.2	ADCY1|ADCY2|ADCY5|CALM1|CAMK2A|CAMK2B|CREBBP|DVL1|DVL3|GNAO1|GNAS|GSK3B|KIT|MITF|PLCB3|PRKCG|TCF7L2|WNT7B|LEF1|TCF7L1|CALML6	-1.7
KEGG Pathway	hsa05130	Pathogenic Escherichia coli infection	-3	ABL1|ACTB|ACTG1|RHOA|CASP9|LPAR1|FCGR2A|FYN|IRAK1|MYH9|NFKBIA|PAK1|TMBIM6|TJP1|TUBA4A|EZR|TUBA1A|NCK2|WASL|ARHGEF11|ARPC2|TUBB3|TUBB4A|TUBB4B|BAIAP2|TAB2|CYFIP1|CYFIP2|TUBA8|MYH14|TUBB	-1.6
KEGG Pathway	hsa05132	Salmonella infection	-2.9	ACTB|ACTG1|AKT2|RHOA|RHOG|DCTN1|DYNC1H1|IRAK1|KIF5C|KLC1|NFKBIA|PAK1|PFN1|TCF7L2|TUBA4A|TUBA1A|RAB7A|WASL|ELMO1|ARPC2|TUBB3|TUBB4A|TUBB4B|DCTN6|TAB2|CYFIP1|PLEKHM2|VPS39|TXN2|CYFIP2|LEF1|TUBA8|VPS16|KLC2|TCF7L1|DYNLRB1|DYNLL2|TUBB	-1.5
KEGG Pathway	hsa04390	Hippo signaling pathway	-2.8	ACTB|ACTG1|BMP4|CCND2|CCND3|CSNK1E|CTNNA2|DLG4|DVL1|DVL3|GSK3B|NF2|PPP1CA|PPP1CC|PPP2R2B|PPP2R2C|PRKCZ|TCF7L2|TEAD1|TGFB1|TGFBR2|WNT7B|YWHAH|AXIN1|LATS2|CTNNA3|LEF1|PPP2R2D|TCF7L1	-1.5
KEGG Pathway	hsa01210	2-Oxocarboxylic acid metabolism	-2.8	ACO2|ACY1|CS|GOT2|GPT|IDH2|IDH3G	-1.4
KEGG Pathway	hsa04810	Regulation of actin cytoskeleton	-2.7	ACTB|ACTG1|AKT2|RHOA|CFL1|CHRM1|LPAR1|FGFR1|FGFR3|FGFR2|ARHGAP35|ITGA6|LIMK1|MSN|MYH9|PAK1|PFN1|PIK3R2|PPP1CA|PPP1CC|EZR|PIP4K2B|WASL|BCAR1|ARPC2|BAIAP2|IQGAP2|CYFIP1|PIP5K1C|CYFIP2|GIT1|RGCC|ARHGEF4|PAK6|MYH14|SSH2	-1.4
KEGG Pathway	hsa04144	Endocytosis	-2.6	GRK2|AP2A1|AP2A2|RHOA|CAPZB|AP2M1|DNM1|EPS15|FGFR3|FGFR2|KIF5C|PML|PRKCZ|SH3GL1|TGFBR2|RAB7A|GBF1|WASL|HGS|IQSEC1|ARPC2|EHD1|WWP1|RAB11FIP2|EPN2|IQSEC2|PIP5K1C|CHMP2A|GIT1|EHD3|SH3GLB1|VTA1|VPS29|SMAP2|AGAP2|AGAP1|AGAP3|VPS37D|IQSEC3	-1.3
KEGG Pathway	hsa00532	Glycosaminoglycan biosynthesis - chondroitin sulfate / dermatan sulfate	-2.6	B3GAT3|CHST11|CHST12|CHST7|XYLT2|CHPF|CHST13	-1.3
KEGG Pathway	hsa05412	Arrhythmogenic right ventricular cardiomyopathy	-2.5	ACTB|ACTG1|ATP2A1|CDH2|CTNNA2|DAG1|ITGA6|JUP|SGCA|TCF7L2|CACNG3|CACNG2|CTNNA3|LEF1|CACNG7|CACNG6|TCF7L1	-1.2
KEGG Pathway	hsa00020	Citrate cycle (TCA cycle)	-2.4	ACO2|CS|IDH2|IDH3G|OGDH|PC|PDHA1|SDHA|SDHC	-1.2
KEGG Pathway	hsa05414	Dilated cardiomyopathy	-2.4	ACTB|ACTG1|ADCY1|ADCY2|ADCY5|AGT|ATP2A1|DAG1|GNAS|ITGA6|MYH6|SGCA|TGFB1|TPM2|TPM3|CACNG3|CACNG2|CACNG7|CACNG6	-1.2
KEGG Pathway	hsa04928	Parathyroid hormone synthesis, secretion and action	-2.4	ADCY1|ADCY2|ADCY5|RHOA|ATF4|CDKN1A|ATF6B|EGR1|FGFR1|GNAS|JUND|MEF2A|MEF2D|MMP15|MMP17|PDE4A|PLCB3|PRKCG|ARHGEF11|SLC34A3	-1.2
KEGG Pathway	hsa04911	Insulin secretion	-2.3	ADCY1|ADCY2|ADCY5|ATF4|ATP1A3|ATP1B2|CAMK2A|CAMK2B|ATF6B|GNAS|KCNN1|PLCB3|PRKCG|RAB3A|STX1A|RIMS2	-1.1
KEGG Pathway	hsa04720	Long-term potentiation	-2.3	ADCY1|ATF4|CALM1|CAMK2A|CAMK2B|CREBBP|GRIN1|GRIN2B|PLCB3|PPP1CA|PPP1CC|PPP3CA|PRKCG|CALML6	-1.1
KEGG Pathway	hsa04934	Cushing syndrome	-2.2	ADCY1|ADCY2|ADCY5|AGT|ATF4|CAMK2A|CAMK2B|SCARB1|CDKN1A|ATF6B|DVL1|DVL3|GNAS|GSK3B|KCNK2|MEN1|PLCB3|TCF7L2|WNT7B|AXIN1|CACNA1G|AIP|LEF1|RASD1|ARMC5|TCF7L1	-1.1
KEGG Pathway	hsa04071	Sphingolipid signaling pathway	-2.2	AKT2|RHOA|CTSD|S1PR1|FYN|MAP3K5|PIK3R2|PLCB3|PPP2R2B|PPP2R2C|PPP2R5B|PPP2R5D|PRKCG|PRKCZ|SMPD1|SMPD2|S1PR2|GAB2|PPP2R3B|PPP2R2D|CERS4|ACER2	-1.1
KEGG Pathway	hsa05230	Central carbon metabolism in cancer	-2.2	AKT2|FGFR1|FGFR3|FGFR2|MTOR|G6PD|HIF1A|HK1|IDH2|KIT|PDHA1|PFKP|PIK3R2|PKM	-1.1
KEGG Pathway	hsa04310	Wnt signaling pathway	-2.2	RHOA|CAMK2A|CAMK2B|CCND2|CCND3|CREBBP|CSNK1E|CSNK2B|CTNND2|DVL1|DVL3|GSK3B|SERPINF1|PLCB3|PPARD|PPP3CA|PRKCG|TBL1X|TCF7L2|WNT7B|AXIN1|BAMBI|LEF1|CTNNBIP1|VANGL2|CHD8|TCF7L1|ZNRF3	-1.1
KEGG Pathway	hsa04022	cGMP-PKG signaling pathway	-2.2	ADCY1|ADCY2|ADCY5|ADRA1D|ADRA2A|AKT2|SLC25A5|RHOA|ATF4|ATP1A3|ATP1B2|ATP2A1|ATP2B2|ATP2B3|CALM1|ATF6B|MEF2A|MEF2D|MYH6|NPPC|PLCB3|PPP1CA|PPP1CC|PPP3CA|SRF|PDE5A|CALML6	-1.1
KEGG Pathway	hsa05202	Transcriptional misregulation in cancer	-2.1	BCL6|CCND2|CDKN1A|CSF1R|DUSP6|ERG|ETV1|ETV4|JUP|MAF|MAX|MEN1|MITF|MLLT1|NGFR|PML|RARA|TFE3|TGFBR2|TSPAN7|ZBTB17|NCOR1|SIN3A|SS18L1|KLF3|BCL11B	-1.1
KEGG Pathway	hsa04713	Circadian entrainment	-2.1	ADCY1|ADCY2|ADCY5|CALM1|CAMK2A|CAMK2B|GNAO1|GNAS|GNB1|GNG7|GRIN1|GRIN2B|PER1|PLCB3|PRKCG|CACNA1G|RASD1|CALML6	-1.1
KEGG Pathway	hsa04152	AMPK signaling pathway	-2.1	AKT2|CD36|EEF2|FASN|MTOR|LIPE|PFKP|PIK3R2|PPP2R2B|PPP2R2C|PPP2R5B|PPP2R5D|STK11|TSC2|ULK1|PPARGC1A|PPP2R3B|PPP2R2D|RPTOR|SCD5|G6PC3	-1.1
KEGG Pathway	hsa04015	Rap1 signaling pathway	-2.1	ACTB|ACTG1|ADCY1|ADCY2|ADCY5|AKT2|RHOA|CALM1|CSF1R|LPAR1|FGFR1|FGFR3|FGFR2|GNAO1|GNAS|RAPGEF1|GRIN1|GRIN2B|KIT|NGFR|PFN1|PIK3R2|PLCB3|PRKCG|PRKCZ|RALGDS|BCAR1|RAPGEF2|SIPA1L3|ANGPT4|SIPA1L2|CALML6	-1.1
KEGG Pathway	hsa04714	Thermogenesis	-2.1	ACTB|ACTG1|ADCY1|ADCY2|ADCY5|COX10|FGFR1|MTOR|GNAS|LIPE|MAP3K5|ATP6|COX1|COX2|ND1|ND2|ND4|ND5|ND6|NDUFS8|NDUFV3|SDHA|SDHC|SMARCA2|SMARCA4|SMARCC2|TSC2|UQCRC1|ARID1A|PPARGC1A|KDM3B|PNPLA2|ARID1B|RPTOR|MLST8	-1.1
KEGG Pathway	hsa01200	Carbon metabolism	-2.1	ACO2|CAT|CS|G6PD|GOT2|GPI|GPT|HK1|IDH2|IDH3G|OGDH|PC|PDHA1|PFKP|PKM|SDHA|SDHC|TALDO1|TKT|ME3	-1.1
KEGG Pathway	hsa04915	Estrogen signaling pathway	-2	ADCY1|ADCY2|ADCY5|AKT2|ATF4|CALM1|ATF6B|CTSD|GNAO1|GNAS|MMP2|PIK3R2|PLCB3|PRKCD|RARA|NCOA1|EBAG9|GABBR2|NCOA2|CALML6	-1
KEGG Pathway	hsa04725	Cholinergic synapse	-2	ACHE|ADCY1|ADCY2|ADCY5|AKT2|ATF4|CAMK2A|CAMK2B|CHRM1|CHRNA4|CHRNB2|FYN|GNAO1|GNB1|GNG7|KCNQ2|KCNQ3|PIK3R2|PLCB3|PRKCG	-1

## Sheet: liver-female-biased-gene-862
Category	GO	Description	LogP	Hits	Log(q-value)
GO Biological Processes	GO:0006412	translation	-48	RPSA|NDUFA7|RPL5|RPL7|RPL9|RPL10|RPL11|RPL12|RPL13|RPL17|RPL18|RPL18A|RPL21|RPL22|RPL23A|MRPL23|RPL24|RPL26|RPL27|RPL30|RPL27A|RPL29|RPL31|RPL32|RPL34|RPL35A|RPL37|RPL37A|RPL38|RPL39|RPL36A|RPLP2|RPS2|RPS3|RPS3A|RPS5|RPS7|RPS8|RPS9|RPS10|RPS12|RPS13|RPS14|RPS15|RPS16|RPS17|RPS18|RPS19|RPS20|RPS21|RPS23|RPS24|RPS25|RPS27|RPS27A|RPS28|RPS29|UBA52|RPL23|MRPL33|MRPL19|RACK1|EIF3M|COPS5|MRPL3|RPL35|HA…	-44
GO Biological Processes	GO:0043043	peptide biosynthetic process	-47	GGT1|RPSA|MGST2|NDUFA7|RPL5|RPL7|RPL9|RPL10|RPL11|RPL12|RPL13|RPL17|RPL18|RPL18A|RPL21|RPL22|RPL23A|MRPL23|RPL24|RPL26|RPL27|RPL30|RPL27A|RPL29|RPL31|RPL32|RPL34|RPL35A|RPL37|RPL37A|RPL38|RPL39|RPL36A|RPLP2|RPS2|RPS3|RPS3A|RPS5|RPS7|RPS8|RPS9|RPS10|RPS12|RPS13|RPS14|RPS15|RPS16|RPS17|RPS18|RPS19|RPS20|RPS21|RPS23|RPS24|RPS25|RPS27|RPS27A|RPS28|RPS29|UBA52|RPL23|MRPL33|MRPL19|RACK1|EIF3M|COPS5|MRP…	-44
GO Biological Processes	GO:0002181	cytoplasmic translation	-47	RPSA|RPL5|RPL7|RPL9|RPL10|RPL11|RPL12|RPL13|RPL17|RPL18|RPL18A|RPL21|RPL22|RPL23A|RPL24|RPL26|RPL27|RPL30|RPL27A|RPL29|RPL31|RPL32|RPL34|RPL35A|RPL37|RPL37A|RPL38|RPL39|RPL36A|RPLP2|RPS2|RPS3|RPS3A|RPS5|RPS7|RPS8|RPS9|RPS10|RPS12|RPS13|RPS14|RPS15|RPS16|RPS17|RPS18|RPS19|RPS20|RPS21|RPS23|RPS24|RPS25|RPS27|RPS27A|RPS28|RPS29|UBA52|RPL23|RACK1|EIF3M|RPL35|RPL36|EIF3K|MCTS1|RPL22L1	-44
GO Biological Processes	GO:0006518	peptide metabolic process	-44	GGT1|GSTA4|GSTM3|RPSA|MGST2|NDUFA7|RPL5|RPL7|RPL9|RPL10|RPL11|RPL12|RPL13|RPL17|RPL18|RPL18A|RPL21|RPL22|RPL23A|MRPL23|RPL24|RPL26|RPL27|RPL30|RPL27A|RPL29|RPL31|RPL32|RPL34|RPL35A|RPL37|RPL37A|RPL38|RPL39|RPL36A|RPLP2|RPS2|RPS3|RPS3A|RPS5|RPS7|RPS8|RPS9|RPS10|RPS12|RPS13|RPS14|RPS15|RPS16|RPS17|RPS18|RPS19|RPS20|RPS21|RPS23|RPS24|RPS25|RPS27|RPS27A|RPS28|RPS29|UBA52|RPL23|GSTO1|MRPL33|ECE2|SPCS2…	-41
GO Biological Processes	GO:0043604	amide biosynthetic process	-37	CEBPA|GGT1|RPSA|MGST2|NDUFA7|RPL5|RPL7|RPL9|RPL10|RPL11|RPL12|RPL13|RPL17|RPL18|RPL18A|RPL21|RPL22|RPL23A|MRPL23|RPL24|RPL26|RPL27|RPL30|RPL27A|RPL29|RPL31|RPL32|RPL34|RPL35A|RPL37|RPL37A|RPL38|RPL39|RPL36A|RPLP2|RPS2|RPS3|RPS3A|RPS5|RPS7|RPS8|RPS9|RPS10|RPS12|RPS13|RPS14|RPS15|RPS16|RPS17|RPS18|RPS19|RPS20|RPS21|RPS23|RPS24|RPS25|RPS27|RPS27A|RPS28|RPS29|UBA52|RPL23|MRPL33|MRPL19|RACK1|PEMT|EIF3…	-34
GO Biological Processes	GO:0006119	oxidative phosphorylation	-34	ATP5F1A|ATP5F1D|ATP5F1E|ATP5ME|ATP5PF|ATP5PO|COX5B|COX6B1|COX6C|COX7A1|COX7A2P2|COX7B|COX15|COX3|NDUFA1|NDUFA2|NDUFA3|NDUFA4|NDUFA6|NDUFA7|NDUFA8|NDUFA9|NDUFB1|NDUFB2|NDUFB4|NDUFB5|NDUFB8|NDUFB9|NDUFB10|NDUFC2|NDUFS4|NDUFS5|NDUFS6|SDHD|UQCRFS1|UQCRH|COX7A2L|COX5A|ATP5MF|ATP5PD|ATP5MG|UQCRQ|UQCR10|NDUFA13|CYCS|NDUFB11|NDUFA12|TEFM|NDUFS7|COA6|CHCHD10|UQCC3	-31
GO Biological Processes	GO:0043603	cellular amide metabolic process	-33	CEBPA|GGT1|GSTA4|GSTM3|RPSA|MGST2|NDUFA7|NIT1|RPL5|RPL7|RPL9|RPL10|RPL11|RPL12|RPL13|RPL17|RPL18|RPL18A|RPL21|RPL22|RPL23A|MRPL23|RPL24|RPL26|RPL27|RPL30|RPL27A|RPL29|RPL31|RPL32|RPL34|RPL35A|RPL37|RPL37A|RPL38|RPL39|RPL36A|RPLP2|RPS2|RPS3|RPS3A|RPS5|RPS7|RPS8|RPS9|RPS10|RPS12|RPS13|RPS14|RPS15|RPS16|RPS17|RPS18|RPS19|RPS20|RPS21|RPS23|RPS24|RPS25|RPS27|RPS27A|RPS28|RPS29|UBA52|RPL23|GSTO1|MRPL33…	-30
GO Biological Processes	GO:0046034	ATP metabolic process	-29	NUDT2|ATP5F1A|ATP5F1D|ATP5F1E|ATP5MC1|ATP5MC2|ATP5MC3|ATP5ME|ATP5PF|ATP5PO|COX5B|COX6B1|COX6C|COX7A1|COX7A2P2|COX7B|COX15|GALK1|COX3|NDUFA1|NDUFA2|NDUFA3|NDUFA4|NDUFA6|NDUFA7|NDUFA8|NDUFA9|NDUFB1|NDUFB2|NDUFB4|NDUFB5|NDUFB8|NDUFB9|NDUFB10|NDUFC2|NDUFS4|NDUFS5|NDUFS6|SDHD|UQCRFS1|UQCRH|COX7A2L|COX5A|ATP5MF|ATP5MJ|ATP5PD|ATP5MG|NUDT5|UQCRQ|UQCR10|NDUFA13|CYCS|NDUFB11|NDUFA12|FIGNL1|TEFM|ATP5MK|NDUF…	-26
GO Biological Processes	GO:0009060	aerobic respiration	-28	ADSL|ATP5F1A|ATP5F1D|ATP5F1E|ATP5ME|ATP5PF|ATP5PO|COX5B|COX6B1|COX6C|COX7A1|COX7A2P2|COX7B|COX15|COX3|NDUFA1|NDUFA2|NDUFA3|NDUFA4|NDUFA6|NDUFA7|NDUFA8|NDUFA9|NDUFB1|NDUFB2|NDUFB4|NDUFB5|NDUFB8|NDUFB9|NDUFB10|NDUFC2|NDUFS4|NDUFS5|NDUFS6|SDHD|SURF1|UQCRFS1|UQCRH|COX7A2L|COX5A|ATP5MF|ATP5PD|ATP5MG|UQCRQ|UQCR10|NDUFA13|CYCS|NDUFB11|NDUFA12|TEFM|NDUFS7|COA6|CHCHD10|UQCC3	-25
GO Biological Processes	GO:0015986	proton motive force-driven ATP synthesis	-27	ATP5F1A|ATP5F1D|ATP5F1E|ATP5MC1|ATP5MC2|ATP5MC3|ATP5ME|ATP5PF|ATP5PO|NDUFA1|NDUFA2|NDUFA3|NDUFA6|NDUFA7|NDUFA8|NDUFA9|NDUFB1|NDUFB2|NDUFB4|NDUFB5|NDUFB8|NDUFB9|NDUFB10|NDUFC2|NDUFS4|NDUFS5|NDUFS6|SDHD|ATP5MF|ATP5MJ|ATP5PD|ATP5MG|NDUFA13|NDUFB11|NDUFA12|ATP5MK|NDUFS7	-25
GO Biological Processes	GO:0009206	purine ribonucleoside triphosphate biosynthetic process	-27	NUDT2|ATP5F1A|ATP5F1D|ATP5F1E|ATP5MC1|ATP5MC2|ATP5MC3|ATP5ME|ATP5PF|ATP5PO|NDUFA1|NDUFA2|NDUFA3|NDUFA6|NDUFA7|NDUFA8|NDUFA9|NDUFB1|NDUFB2|NDUFB4|NDUFB5|NDUFB8|NDUFB9|NDUFB10|NDUFC2|NDUFS4|NDUFS5|NDUFS6|NME2|SDHD|ATP5MF|ATP5MJ|ATP5PD|ATP5MG|NME7|NDUFA13|NDUFB11|NDUFA12|ATP5MK|NDUFS7|UQCC3	-24
GO Biological Processes	GO:0006754	ATP biosynthetic process	-27	NUDT2|ATP5F1A|ATP5F1D|ATP5F1E|ATP5MC1|ATP5MC2|ATP5MC3|ATP5ME|ATP5PF|ATP5PO|NDUFA1|NDUFA2|NDUFA3|NDUFA6|NDUFA7|NDUFA8|NDUFA9|NDUFB1|NDUFB2|NDUFB4|NDUFB5|NDUFB8|NDUFB9|NDUFB10|NDUFC2|NDUFS4|NDUFS5|NDUFS6|SDHD|ATP5MF|ATP5MJ|ATP5PD|ATP5MG|NDUFA13|NDUFB11|NDUFA12|ATP5MK|NDUFS7|UQCC3	-24
GO Biological Processes	GO:0009145	purine nucleoside triphosphate biosynthetic process	-27	NUDT2|ATP5F1A|ATP5F1D|ATP5F1E|ATP5MC1|ATP5MC2|ATP5MC3|ATP5ME|ATP5PF|ATP5PO|NDUFA1|NDUFA2|NDUFA3|NDUFA6|NDUFA7|NDUFA8|NDUFA9|NDUFB1|NDUFB2|NDUFB4|NDUFB5|NDUFB8|NDUFB9|NDUFB10|NDUFC2|NDUFS4|NDUFS5|NDUFS6|NME2|SDHD|ATP5MF|ATP5MJ|ATP5PD|ATP5MG|NME7|NDUFA13|NDUFB11|NDUFA12|ATP5MK|NDUFS7|UQCC3	-24
GO Biological Processes	GO:0045333	cellular respiration	-26	ADSL|ATP5F1A|ATP5F1D|ATP5F1E|ATP5ME|ATP5PF|ATP5PO|COX5B|COX6B1|COX6C|COX7A1|COX7A2P2|COX7B|COX15|ETFA|ETFB|COX3|NDUFA1|NDUFA2|NDUFA3|NDUFA4|NDUFA6|NDUFA7|NDUFA8|NDUFA9|NDUFB1|NDUFB2|NDUFB4|NDUFB5|NDUFB8|NDUFB9|NDUFB10|NDUFC2|NDUFS4|NDUFS5|NDUFS6|SDHD|SURF1|UQCRFS1|UQCRH|COX7A2L|COX5A|ATP5MF|ATP5PD|ATP5MG|UQCRQ|UQCR10|NDUFA13|CYCS|NDUFB11|NDUFA12|TEFM|NDUFS7|COA6|CHCHD10|UQCC3	-23
GO Biological Processes	GO:0033108	mitochondrial respiratory chain complex assembly	-26	BCS1L|NDUFA1|NDUFA2|NDUFA3|NDUFA6|NDUFA8|NDUFA9|NDUFB1|NDUFB2|NDUFB4|NDUFB5|NDUFB8|NDUFB9|NDUFB10|NDUFC2|NDUFS4|NDUFS5|SURF1|UQCRFS1|COX17|NDUFA13|COX16|NDUFB11|TMEM126B|NDUFA12|NDUFAF5|TMEM126A|UQCC2|COX14|DMAC1|NDUFAF2|COX20|NDUFAF6|NDUFAF8|NDUFS7|SMIM20|COA5|C12orf73|UQCC3|PET100	-23
GO Biological Processes	GO:0009201	ribonucleoside triphosphate biosynthetic process	-26	NUDT2|ATP5F1A|ATP5F1D|ATP5F1E|ATP5MC1|ATP5MC2|ATP5MC3|ATP5ME|ATP5PF|ATP5PO|NDUFA1|NDUFA2|NDUFA3|NDUFA6|NDUFA7|NDUFA8|NDUFA9|NDUFB1|NDUFB2|NDUFB4|NDUFB5|NDUFB8|NDUFB9|NDUFB10|NDUFC2|NDUFS4|NDUFS5|NDUFS6|NME2|SDHD|ATP5MF|ATP5MJ|ATP5PD|ATP5MG|NME7|NDUFA13|NDUFB11|NDUFA12|ATP5MK|NDUFS7|UQCC3	-23
GO Biological Processes	GO:0042773	ATP synthesis coupled electron transport	-25	COX5B|COX6B1|COX6C|COX7A1|COX7A2P2|COX7B|COX15|COX3|NDUFA1|NDUFA2|NDUFA3|NDUFA4|NDUFA6|NDUFA7|NDUFA8|NDUFA9|NDUFB1|NDUFB2|NDUFB4|NDUFB5|NDUFB8|NDUFB9|NDUFB10|NDUFC2|NDUFS4|NDUFS5|NDUFS6|SDHD|UQCRFS1|UQCRH|COX7A2L|COX5A|UQCRQ|UQCR10|CYCS|NDUFA12|NDUFS7|COA6|UQCC3	-23
GO Biological Processes	GO:0042775	mitochondrial ATP synthesis coupled electron transport	-25	COX5B|COX6B1|COX6C|COX7A1|COX7A2P2|COX7B|COX15|COX3|NDUFA1|NDUFA2|NDUFA3|NDUFA4|NDUFA6|NDUFA7|NDUFA8|NDUFA9|NDUFB1|NDUFB2|NDUFB4|NDUFB5|NDUFB8|NDUFB9|NDUFB10|NDUFC2|NDUFS4|NDUFS5|NDUFS6|SDHD|UQCRFS1|UQCRH|COX7A2L|COX5A|UQCRQ|UQCR10|CYCS|NDUFA12|NDUFS7|COA6|UQCC3	-23
GO Biological Processes	GO:0009205	purine ribonucleoside triphosphate metabolic process	-25	NUDT2|ATP5F1A|ATP5F1D|ATP5F1E|ATP5MC1|ATP5MC2|ATP5MC3|ATP5ME|ATP5PF|ATP5PO|ITPA|NDUFA1|NDUFA2|NDUFA3|NDUFA6|NDUFA7|NDUFA8|NDUFA9|NDUFB1|NDUFB2|NDUFB4|NDUFB5|NDUFB8|NDUFB9|NDUFB10|NDUFC2|NDUFS4|NDUFS5|NDUFS6|NME2|SDHD|ATP5MF|ATP5MJ|ATP5PD|ATP5MG|NME7|NDUFA13|NDUFB11|NDUFA12|ATP5MK|NDUFS7|UQCC3	-22
GO Biological Processes	GO:0034645	cellular macromolecule biosynthetic process	-25	RPSA|NDUFA7|RPL5|RPL7|RPL9|RPL10|RPL11|RPL12|RPL13|RPL17|RPL18|RPL18A|RPL21|RPL22|RPL23A|MRPL23|RPL24|RPL26|RPL27|RPL30|RPL27A|RPL29|RPL31|RPL32|RPL34|RPL35A|RPL37|RPL37A|RPL38|RPL39|RPL36A|RPLP2|RPS2|RPS3|RPS3A|RPS5|RPS7|RPS8|RPS9|RPS10|RPS12|RPS13|RPS14|RPS15|RPS16|RPS17|RPS18|RPS19|RPS20|RPS21|RPS23|RPS24|RPS25|RPS27|RPS27A|RPS28|RPS29|UBA52|UGP2|VEGFB|OGT|B3GALNT1|RPL23|ATG5|MRPL33|MRPL19|RAC…	-22
GO Biological Processes	GO:0019646	aerobic electron transport chain	-24	COX5B|COX6B1|COX6C|COX7A1|COX7A2P2|COX7B|COX15|COX3|NDUFA1|NDUFA2|NDUFA3|NDUFA4|NDUFA6|NDUFA7|NDUFA8|NDUFA9|NDUFB1|NDUFB2|NDUFB4|NDUFB5|NDUFB8|NDUFB9|NDUFB10|NDUFC2|NDUFS4|NDUFS5|NDUFS6|SDHD|UQCRFS1|UQCRH|COX7A2L|COX5A|UQCRQ|UQCR10|CYCS|NDUFS7|UQCC3	-22
GO Biological Processes	GO:0009144	purine nucleoside triphosphate metabolic process	-24	NUDT2|ATP5F1A|ATP5F1D|ATP5F1E|ATP5MC1|ATP5MC2|ATP5MC3|ATP5ME|ATP5PF|ATP5PO|ITPA|NDUFA1|NDUFA2|NDUFA3|NDUFA6|NDUFA7|NDUFA8|NDUFA9|NDUFB1|NDUFB2|NDUFB4|NDUFB5|NDUFB8|NDUFB9|NDUFB10|NDUFC2|NDUFS4|NDUFS5|NDUFS6|NME2|SDHD|ATP5MF|ATP5MJ|ATP5PD|ATP5MG|NME7|NDUFA13|NDUFB11|NDUFA12|ATP5MK|NDUFS7|UQCC3	-21
GO Biological Processes	GO:0009199	ribonucleoside triphosphate metabolic process	-24	NUDT2|ATP5F1A|ATP5F1D|ATP5F1E|ATP5MC1|ATP5MC2|ATP5MC3|ATP5ME|ATP5PF|ATP5PO|ITPA|NDUFA1|NDUFA2|NDUFA3|NDUFA6|NDUFA7|NDUFA8|NDUFA9|NDUFB1|NDUFB2|NDUFB4|NDUFB5|NDUFB8|NDUFB9|NDUFB10|NDUFC2|NDUFS4|NDUFS5|NDUFS6|NME2|SDHD|ATP5MF|ATP5MJ|ATP5PD|ATP5MG|NME7|NDUFA13|NDUFB11|NDUFA12|ATP5MK|NDUFS7|UQCC3	-21
GO Biological Processes	GO:0042776	proton motive force-driven mitochondrial ATP synthesis	-24	ATP5F1A|ATP5F1D|ATP5F1E|ATP5ME|ATP5PF|ATP5PO|NDUFA1|NDUFA2|NDUFA3|NDUFA6|NDUFA7|NDUFA8|NDUFA9|NDUFB1|NDUFB2|NDUFB4|NDUFB5|NDUFB8|NDUFB9|NDUFB10|NDUFC2|NDUFS4|NDUFS5|NDUFS6|SDHD|ATP5MF|ATP5PD|ATP5MG|NDUFA13|NDUFB11|NDUFA12|NDUFS7	-21
GO Biological Processes	GO:0009142	nucleoside triphosphate biosynthetic process	-23	NUDT2|ATP5F1A|ATP5F1D|ATP5F1E|ATP5MC1|ATP5MC2|ATP5MC3|ATP5ME|ATP5PF|ATP5PO|NDUFA1|NDUFA2|NDUFA3|NDUFA6|NDUFA7|NDUFA8|NDUFA9|NDUFB1|NDUFB2|NDUFB4|NDUFB5|NDUFB8|NDUFB9|NDUFB10|NDUFC2|NDUFS4|NDUFS5|NDUFS6|NME2|SDHD|ATP5MF|ATP5MJ|ATP5PD|ATP5MG|NME7|NDUFA13|NDUFB11|NDUFA12|ATP5MK|NDUFS7|UQCC3	-20
GO Biological Processes	GO:0022904	respiratory electron transport chain	-23	COX5B|COX6B1|COX6C|COX7A1|COX7A2P2|COX7B|COX15|ETFA|ETFB|COX3|NDUFA1|NDUFA2|NDUFA3|NDUFA4|NDUFA6|NDUFA7|NDUFA8|NDUFA9|NDUFB1|NDUFB2|NDUFB4|NDUFB5|NDUFB8|NDUFB9|NDUFB10|NDUFC2|NDUFS4|NDUFS5|NDUFS6|SDHD|UQCRFS1|UQCRH|COX7A2L|COX5A|UQCRQ|UQCR10|CYCS|NDUFA12|NDUFS7|COA6|UQCC3	-20
GO Biological Processes	GO:0022900	electron transport chain	-23	ADH5|ALDH2|COX5B|COX6B1|COX6C|COX7A1|COX7A2P2|COX7B|COX15|ETFA|ETFB|FDX1|COX3|NDUFA1|NDUFA2|NDUFA3|NDUFA4|NDUFA6|NDUFA7|NDUFA8|NDUFA9|NDUFB1|NDUFB2|NDUFB4|NDUFB5|NDUFB8|NDUFB9|NDUFB10|NDUFC2|NDUFS4|NDUFS5|NDUFS6|SDHD|SURF1|UQCRFS1|UQCRH|AKR7A2|RDH16|COX7A2L|COX5A|UQCRQ|UQCR10|GLRX2|CYCS|NDUFA12|FDX2|NDUFS7|COA6|UQCC3	-20
GO Biological Processes	GO:0007005	mitochondrion organization	-22	ATP5F1D|BCS1L|TSPO|CEBPA|COX7A1|COX7A2P2|TYMP|HSPD1|NDUFA1|NDUFA2|NDUFA3|NDUFA6|NDUFA8|NDUFA9|NDUFB1|NDUFB2|NDUFB4|NDUFB5|NDUFB8|NDUFB9|NDUFB10|NDUFC2|NDUFS4|NDUFS5|PRKN|SSBP1|SURF1|UQCRFS1|VDAC2|OGT|COX7A2L|ATG5|COX17|TIMM17A|MTX2|PARK7|GABARAPL2|TIMM10B|HTRA2|NDUFA13|CHCHD2|COX16|NDUFB11|TOMM7|TMEM70|TMEM126B|NDUFA12|RAB5IF|NDUFAF5|MAIP1|MAP1LC3B|SLIRP|TMEM126A|UQCC2|MGARP|COX14|DMAC1|ATP23|NDU…	-19
GO Biological Processes	GO:0015980	energy derivation by oxidation of organic compounds	-21	ADSL|ATP5F1A|ATP5F1D|ATP5F1E|ATP5ME|ATP5PF|ATP5PO|COX5B|COX6B1|COX6C|COX7A1|COX7A2P2|COX7B|COX15|ETFA|ETFB|COX3|NDUFA1|NDUFA2|NDUFA3|NDUFA4|NDUFA6|NDUFA7|NDUFA8|NDUFA9|NDUFB1|NDUFB2|NDUFB4|NDUFB5|NDUFB8|NDUFB9|NDUFB10|NDUFC2|NDUFS4|NDUFS5|NDUFS6|SDHD|SURF1|UGP2|UQCRFS1|UQCRH|COX7A2L|COX5A|ATP5MF|ATP5PD|ATP5MG|UQCRQ|UQCR10|NDUFA13|CYCS|NDUFB11|NDUFA12|PPP1R3B|TEFM|NDUFS7|COA6|CHCHD10|UQCC3	-18
GO Biological Processes	GO:0009141	nucleoside triphosphate metabolic process	-20	NUDT2|ATP5F1A|ATP5F1D|ATP5F1E|ATP5MC1|ATP5MC2|ATP5MC3|ATP5ME|ATP5PF|ATP5PO|ITPA|NDUFA1|NDUFA2|NDUFA3|NDUFA6|NDUFA7|NDUFA8|NDUFA9|NDUFB1|NDUFB2|NDUFB4|NDUFB5|NDUFB8|NDUFB9|NDUFB10|NDUFC2|NDUFS4|NDUFS5|NDUFS6|NME2|SDHD|ATP5MF|ATP5MJ|ATP5PD|ATP5MG|NME7|NDUFA13|NDUFB11|NDUFA12|ATP5MK|NDUFS7|UQCC3	-18
GO Biological Processes	GO:0010257	NADH dehydrogenase complex assembly	-20	BCS1L|NDUFA1|NDUFA2|NDUFA3|NDUFA6|NDUFA8|NDUFA9|NDUFB1|NDUFB2|NDUFB4|NDUFB5|NDUFB8|NDUFB9|NDUFB10|NDUFC2|NDUFS4|NDUFS5|NDUFA13|NDUFB11|TMEM126B|NDUFA12|NDUFAF5|TMEM126A|DMAC1|NDUFAF2|NDUFAF6|NDUFAF8|NDUFS7	-17
GO Biological Processes	GO:0032981	mitochondrial respiratory chain complex I assembly	-20	BCS1L|NDUFA1|NDUFA2|NDUFA3|NDUFA6|NDUFA8|NDUFA9|NDUFB1|NDUFB2|NDUFB4|NDUFB5|NDUFB8|NDUFB9|NDUFB10|NDUFC2|NDUFS4|NDUFS5|NDUFA13|NDUFB11|TMEM126B|NDUFA12|NDUFAF5|TMEM126A|DMAC1|NDUFAF2|NDUFAF6|NDUFAF8|NDUFS7	-17
GO Biological Processes	GO:0006091	generation of precursor metabolites and energy	-19	ADH5|ADSL|ALDH2|ATP5F1A|ATP5F1D|ATP5F1E|ATP5ME|ATP5PF|ATP5PO|CEBPA|COX5B|COX6B1|COX6C|COX7A1|COX7A2P2|COX7B|COX15|ETFA|ETFB|FDX1|GALK1|COX3|NDUFA1|NDUFA2|NDUFA3|NDUFA4|NDUFA6|NDUFA7|NDUFA8|NDUFA9|NDUFB1|NDUFB2|NDUFB4|NDUFB5|NDUFB8|NDUFB9|NDUFB10|NDUFC2|NDUFS4|NDUFS5|NDUFS6|SDHD|SURF1|UGP2|UQCRFS1|UQCRH|AKR7A2|RDH16|COX7A2L|COX5A|ATP5MF|COX17|ATP5PD|ATP5MG|UQCRQ|UQCR10|GLRX2|DERA|NDUFA13|CYCS|NDUF…	-16
GO Biological Processes	GO:0032543	mitochondrial translation	-18	NDUFA7|MRPL23|MRPL33|MRPL19|MRPL3|MRPS28|MRPL42|MRPL13|MRPL18|MRPS18C|MRPL2|MRPL51|MRPL27|MRPS23|MRPS33|MRPL39|MRPL50|AURKAIP1|MRPL20|QRSL1|RARS2|MRPL47|MRPS14|MRPL14|MRPS11|MRPS6|MRPL36|MRPL34|MRPL11|MRPL9|TARS2|MRPL43|MRPL54|MRPL52|MRPL21	-15
GO Biological Processes	GO:0009152	purine ribonucleotide biosynthetic process	-16	ADSL|NUDT2|ATP5F1A|ATP5F1D|ATP5F1E|ATP5MC1|ATP5MC2|ATP5MC3|ATP5ME|ATP5PF|ATP5PO|NDUFA1|NDUFA2|NDUFA3|NDUFA6|NDUFA7|NDUFA8|NDUFA9|NDUFB1|NDUFB2|NDUFB4|NDUFB5|NDUFB8|NDUFB9|NDUFB10|NDUFC2|NDUFS4|NDUFS5|NDUFS6|NME2|SDHD|ATP5MF|ATP5MJ|ATP5PD|ATP5MG|NME7|SLC35B3|NDUFA13|NDUFB11|NDUFA12|PPCDC|ATP5MK|NDUFS7|UQCC3	-13
GO Biological Processes	GO:0009260	ribonucleotide biosynthetic process	-15	ADSL|NUDT2|ATP5F1A|ATP5F1D|ATP5F1E|ATP5MC1|ATP5MC2|ATP5MC3|ATP5ME|ATP5PF|ATP5PO|NDUFA1|NDUFA2|NDUFA3|NDUFA6|NDUFA7|NDUFA8|NDUFA9|NDUFB1|NDUFB2|NDUFB4|NDUFB5|NDUFB8|NDUFB9|NDUFB10|NDUFC2|NDUFS4|NDUFS5|NDUFS6|NME2|SDHD|ATP5MF|ATP5MJ|ATP5PD|ATP5MG|NME7|SLC35B3|NDUFA13|NDUFB11|NDUFA12|PPCDC|ATP5MK|UPRT|NDUFS7|UQCC3	-13
GO Biological Processes	GO:0140053	mitochondrial gene expression	-15	NDUFA7|MRPL23|MRPL33|MRPL19|MRPL3|MRPS28|MRPL42|MRPL13|MRPL18|MRPS18C|MRPL2|MRPL51|MRPL27|MRPS23|MRPS33|MRPL39|MRPL50|TRMT10C|AURKAIP1|MRPL20|QRSL1|RARS2|MRPL47|MRPS14|MRPL14|MRPS11|MRPS6|MRPL36|MRPL34|MRPL11|MRPL9|TEFM|TARS2|MRPL43|MRPL54|MRPL52|MRPL21	-13
GO Biological Processes	GO:0006164	purine nucleotide biosynthetic process	-15	ADSL|NUDT2|ATP5F1A|ATP5F1D|ATP5F1E|ATP5MC1|ATP5MC2|ATP5MC3|ATP5ME|ATP5PF|ATP5PO|NDUFA1|NDUFA2|NDUFA3|NDUFA6|NDUFA7|NDUFA8|NDUFA9|NDUFB1|NDUFB2|NDUFB4|NDUFB5|NDUFB8|NDUFB9|NDUFB10|NDUFC2|NDUFS4|NDUFS5|NDUFS6|NME2|SDHD|ATP5MF|ATP5MJ|ATP5PD|ATP5MG|NME7|SLC35B3|NDUFA13|NDUFB11|NDUFA12|PPCDC|ATP5MK|NDUFS7|UQCC3	-13
GO Biological Processes	GO:0072522	purine-containing compound biosynthetic process	-15	ADSL|NUDT2|ATP5F1A|ATP5F1D|ATP5F1E|ATP5MC1|ATP5MC2|ATP5MC3|ATP5ME|ATP5PF|ATP5PO|NDUFA1|NDUFA2|NDUFA3|NDUFA6|NDUFA7|NDUFA8|NDUFA9|NDUFB1|NDUFB2|NDUFB4|NDUFB5|NDUFB8|NDUFB9|NDUFB10|NDUFC2|NDUFS4|NDUFS5|NDUFS6|NME2|SDHD|ATP5MF|ATP5MJ|ATP5PD|ATP5MG|NME7|SLC35B3|NDUFA13|ADA2|NDUFB11|NDUFA12|PPCDC|ATP5MK|NDUFS7|UQCC3	-13
GO Biological Processes	GO:0046390	ribose phosphate biosynthetic process	-15	ADSL|NUDT2|ATP5F1A|ATP5F1D|ATP5F1E|ATP5MC1|ATP5MC2|ATP5MC3|ATP5ME|ATP5PF|ATP5PO|NDUFA1|NDUFA2|NDUFA3|NDUFA6|NDUFA7|NDUFA8|NDUFA9|NDUFB1|NDUFB2|NDUFB4|NDUFB5|NDUFB8|NDUFB9|NDUFB10|NDUFC2|NDUFS4|NDUFS5|NDUFS6|NME2|SDHD|ATP5MF|ATP5MJ|ATP5PD|ATP5MG|NME7|SLC35B3|NDUFA13|NDUFB11|NDUFA12|PPCDC|ATP5MK|UPRT|NDUFS7|UQCC3	-12
GO Biological Processes	GO:0006120	mitochondrial electron transport, NADH to ubiquinone	-14	NDUFA1|NDUFA2|NDUFA3|NDUFA4|NDUFA6|NDUFA7|NDUFA8|NDUFA9|NDUFB1|NDUFB2|NDUFB4|NDUFB5|NDUFB8|NDUFB9|NDUFB10|NDUFC2|NDUFS4|NDUFS5|NDUFS6|NDUFS7	-11
GO Biological Processes	GO:0009165	nucleotide biosynthetic process	-13	ADSL|NUDT2|ATP5F1A|ATP5F1D|ATP5F1E|ATP5MC1|ATP5MC2|ATP5MC3|ATP5ME|ATP5PF|ATP5PO|NDUFA1|NDUFA2|NDUFA3|NDUFA6|NDUFA7|NDUFA8|NDUFA9|NDUFB1|NDUFB2|NDUFB4|NDUFB5|NDUFB8|NDUFB9|NDUFB10|NDUFC2|NDUFS4|NDUFS5|NDUFS6|NME2|SDHD|SLC22A13|ATP5MF|ATP5MJ|ATP5PD|ATP5MG|QPRT|NME7|SLC35B3|NDUFA13|NDUFB11|NADSYN1|NDUFA12|PPCDC|ATP5MK|UPRT|NDUFS7|UQCC3	-11
GO Biological Processes	GO:1901293	nucleoside phosphate biosynthetic process	-13	ADSL|NUDT2|ATP5F1A|ATP5F1D|ATP5F1E|ATP5MC1|ATP5MC2|ATP5MC3|ATP5ME|ATP5PF|ATP5PO|NDUFA1|NDUFA2|NDUFA3|NDUFA6|NDUFA7|NDUFA8|NDUFA9|NDUFB1|NDUFB2|NDUFB4|NDUFB5|NDUFB8|NDUFB9|NDUFB10|NDUFC2|NDUFS4|NDUFS5|NDUFS6|NME2|SDHD|SLC22A13|ATP5MF|ATP5MJ|ATP5PD|ATP5MG|QPRT|NME7|SLC35B3|NDUFA13|NDUFB11|NADSYN1|NDUFA12|PPCDC|ATP5MK|UPRT|NDUFS7|UQCC3	-11
GO Biological Processes	GO:0042254	ribosome biogenesis	-12	RPSA|PIN4|RPL5|RPL7|RPL10|RPL11|RPL23A|RPL24|RPL26|RPL27|RPL35A|RPL38|RPS5|RPS7|RPS8|RPS14|RPS15|RPS16|RPS17|RPS19|RPS21|RPS24|RPS25|RPS27|RPS28|MPHOSPH6|NSA2|C1D|RPP30|RPL35|EXOSC8|EXOSC7|ZNF658|MTG2|RPS27L|UTP18|POP5|TRMT112|MRPL20|LYAR|RIOK2|EXOSC5|MRPS11|MRPL36|ERI3|SLX9|MALSU1|RBIS|GTF2H5	-9.3
GO Biological Processes	GO:0017004	cytochrome complex assembly	-11	BCS1L|COX15|COX3|SURF1|UQCRFS1|COX17|COX16|UQCC2|COX14|COX20|COA6|SMIM20|COA5|C12orf73|UQCC3|PET100	-8.7
GO Biological Processes	GO:0009117	nucleotide metabolic process	-10	ADSL|NUDT2|ATP5F1A|ATP5F1D|ATP5F1E|ATP5MC1|ATP5MC2|ATP5MC3|ATP5ME|ATP5PF|ATP5PO|TYMP|GALK1|HINT1|ITPA|NDUFA1|NDUFA2|NDUFA3|NDUFA6|NDUFA7|NDUFA8|NDUFA9|NDUFB1|NDUFB2|NDUFB4|NDUFB5|NDUFB8|NDUFB9|NDUFB10|NDUFC2|NDUFS4|NDUFS5|NDUFS6|NME2|SDHD|SLC22A13|ATP5MF|ATP5MJ|ATP5PD|ATP5MG|NUDT5|PARK7|SARM1|QPRT|NME7|SLC35B3|DERA|NDUFA13|NDUFB11|OXSM|NADSYN1|NDUFA12|PPCDC|NEIL1|ACSF2|MCEE|ATP5MK|UPRT|NUDT7|NDUF…	-8.1
GO Biological Processes	GO:0006753	nucleoside phosphate metabolic process	-10	ADSL|NUDT2|ATP5F1A|ATP5F1D|ATP5F1E|ATP5MC1|ATP5MC2|ATP5MC3|ATP5ME|ATP5PF|ATP5PO|TYMP|GALK1|HINT1|ITPA|NDUFA1|NDUFA2|NDUFA3|NDUFA6|NDUFA7|NDUFA8|NDUFA9|NDUFB1|NDUFB2|NDUFB4|NDUFB5|NDUFB8|NDUFB9|NDUFB10|NDUFC2|NDUFS4|NDUFS5|NDUFS6|NME2|SDHD|SLC22A13|ATP5MF|ATP5MJ|ATP5PD|ATP5MG|NUDT5|PARK7|SARM1|QPRT|NME7|SLC35B3|DERA|NDUFA13|NDUFB11|OXSM|NADSYN1|NDUFA12|PPCDC|NEIL1|ACSF2|MCEE|ATP5MK|UPRT|NUDT7|NDUF…	-7.8
GO Biological Processes	GO:0009150	purine ribonucleotide metabolic process	-10	ADSL|NUDT2|ATP5F1A|ATP5F1D|ATP5F1E|ATP5MC1|ATP5MC2|ATP5MC3|ATP5ME|ATP5PF|ATP5PO|GALK1|HINT1|ITPA|NDUFA1|NDUFA2|NDUFA3|NDUFA6|NDUFA7|NDUFA8|NDUFA9|NDUFB1|NDUFB2|NDUFB4|NDUFB5|NDUFB8|NDUFB9|NDUFB10|NDUFC2|NDUFS4|NDUFS5|NDUFS6|NME2|SDHD|ATP5MF|ATP5MJ|ATP5PD|ATP5MG|NME7|SLC35B3|NDUFA13|NDUFB11|OXSM|NDUFA12|PPCDC|ACSF2|MCEE|ATP5MK|NUDT7|NDUFS7|UQCC3	-7.8
GO Biological Processes	GO:0072521	purine-containing compound metabolic process	-10	ADSL|NUDT2|ATP5F1A|ATP5F1D|ATP5F1E|ATP5MC1|ATP5MC2|ATP5MC3|ATP5ME|ATP5PF|ATP5PO|GALK1|HINT1|ITPA|NDUFA1|NDUFA2|NDUFA3|NDUFA6|NDUFA7|NDUFA8|NDUFA9|NDUFB1|NDUFB2|NDUFB4|NDUFB5|NDUFB8|NDUFB9|NDUFB10|NDUFC2|NDUFS4|NDUFS5|NDUFS6|NME2|SDHD|TTR|ATP5MF|ATP5MJ|ATP5PD|ATP5MG|MACROD1|NME7|SLC35B3|NDUFA13|ADA2|NDUFB11|OXSM|NDUFA12|PPCDC|ACSF2|MCEE|ATP5MK|NUDT7|NDUFS7|UQCC3	-7.8
GO Biological Processes	GO:0019693	ribose phosphate metabolic process	-9.7	ADSL|NUDT2|ATP5F1A|ATP5F1D|ATP5F1E|ATP5MC1|ATP5MC2|ATP5MC3|ATP5ME|ATP5PF|ATP5PO|GALK1|HINT1|ITPA|NDUFA1|NDUFA2|NDUFA3|NDUFA6|NDUFA7|NDUFA8|NDUFA9|NDUFB1|NDUFB2|NDUFB4|NDUFB5|NDUFB8|NDUFB9|NDUFB10|NDUFC2|NDUFS4|NDUFS5|NDUFS6|NME2|SDHD|ATP5MF|ATP5MJ|ATP5PD|ATP5MG|NUDT5|NME7|SLC35B3|NDUFA13|NDUFB11|OXSM|NDUFA12|PPCDC|ACSF2|MCEE|ATP5MK|UPRT|NUDT7|NDUFS7|UQCC3	-7.4
GO Biological Processes	GO:0022613	ribonucleoprotein complex biogenesis	-9.7	RPSA|PIN4|RPL5|RPL7|RPL10|RPL11|RPL23A|RPL24|RPL26|RPL27|RPL35A|RPL38|RPS5|RPS7|RPS8|RPS14|RPS15|RPS16|RPS17|RPS19|RPS21|RPS24|RPS25|RPS27|RPS28|SRSF6|SNRPD2|SNRPF|SNRPG|TARBP2|RBM5|MPHOSPH6|NSA2|C1D|EIF3M|RPP30|RPL35|EXOSC8|EXOSC7|ZNF658|MTG2|EIF3K|MCTS1|RPS27L|UTP18|POP5|TRMT112|MRPL20|LYAR|RIOK2|EXOSC5|MRPS11|MRPL36|ERI3|SLX9|MALSU1|RBIS|GTF2H5	-7.4
GO Biological Processes	GO:0009259	ribonucleotide metabolic process	-9.7	ADSL|NUDT2|ATP5F1A|ATP5F1D|ATP5F1E|ATP5MC1|ATP5MC2|ATP5MC3|ATP5ME|ATP5PF|ATP5PO|GALK1|HINT1|ITPA|NDUFA1|NDUFA2|NDUFA3|NDUFA6|NDUFA7|NDUFA8|NDUFA9|NDUFB1|NDUFB2|NDUFB4|NDUFB5|NDUFB8|NDUFB9|NDUFB10|NDUFC2|NDUFS4|NDUFS5|NDUFS6|NME2|SDHD|ATP5MF|ATP5MJ|ATP5PD|ATP5MG|NME7|SLC35B3|NDUFA13|NDUFB11|OXSM|NDUFA12|PPCDC|ACSF2|MCEE|ATP5MK|UPRT|NUDT7|NDUFS7|UQCC3	-7.4
GO Biological Processes	GO:0055086	nucleobase-containing small molecule metabolic process	-9.7	ADSL|NUDT2|ATP5F1A|ATP5F1D|ATP5F1E|ATP5MC1|ATP5MC2|ATP5MC3|ATP5ME|ATP5PF|ATP5PO|TYMP|GALK1|HINT1|ITPA|NDUFA1|NDUFA2|NDUFA3|NDUFA6|NDUFA7|NDUFA8|NDUFA9|NDUFB1|NDUFB2|NDUFB4|NDUFB5|NDUFB8|NDUFB9|NDUFB10|NDUFC2|NDUFS4|NDUFS5|NDUFS6|NME2|SDHD|TTR|UGP2|SLC22A13|ATP5MF|ATP5MJ|ATP5PD|ATP5MG|NUDT5|PARK7|SARM1|QPRT|MACROD1|NME7|SLC35B3|DERA|NDUFA13|ADA2|NDUFB11|OXSM|NADSYN1|NDUFA12|PPCDC|NEIL1|ACSF2|MCEE|…	-7.4
GO Biological Processes	GO:0006163	purine nucleotide metabolic process	-9.6	ADSL|NUDT2|ATP5F1A|ATP5F1D|ATP5F1E|ATP5MC1|ATP5MC2|ATP5MC3|ATP5ME|ATP5PF|ATP5PO|GALK1|HINT1|ITPA|NDUFA1|NDUFA2|NDUFA3|NDUFA6|NDUFA7|NDUFA8|NDUFA9|NDUFB1|NDUFB2|NDUFB4|NDUFB5|NDUFB8|NDUFB9|NDUFB10|NDUFC2|NDUFS4|NDUFS5|NDUFS6|NME2|SDHD|ATP5MF|ATP5MJ|ATP5PD|ATP5MG|NME7|SLC35B3|NDUFA13|NDUFB11|OXSM|NDUFA12|PPCDC|ACSF2|MCEE|ATP5MK|NUDT7|NDUFS7|UQCC3	-7.3
GO Biological Processes	GO:0006123	mitochondrial electron transport, cytochrome c to oxygen	-9.3	COX5B|COX6B1|COX6C|COX7A1|COX7A2P2|COX7B|COX15|COX3|NDUFA4|COX7A2L|COX5A|CYCS	-7
GO Biological Processes	GO:0008535	respiratory chain complex IV assembly	-9	BCS1L|COX15|COX3|SURF1|COX17|COX16|COX14|COX20|COA6|SMIM20|COA5|PET100	-6.7
GO Biological Processes	GO:0006364	rRNA processing	-8.5	PIN4|RPL5|RPL7|RPL11|RPL26|RPL27|RPL35A|RPS7|RPS8|RPS14|RPS15|RPS16|RPS17|RPS19|RPS21|RPS24|RPS25|RPS27|RPS28|MPHOSPH6|NSA2|C1D|RPP30|RPL35|EXOSC8|EXOSC7|UTP18|POP5|TRMT112|LYAR|RIOK2|EXOSC5|MRPS11|ERI3|SLX9|GTF2H5	-6.2
GO Biological Processes	GO:0042274	ribosomal small subunit biogenesis	-8.4	RPSA|RPL38|RPS5|RPS7|RPS8|RPS14|RPS15|RPS16|RPS17|RPS19|RPS21|RPS24|RPS25|RPS27|RPS28|RPS27L|RIOK2|MRPS11|SLX9|GTF2H5	-6.2
GO Biological Processes	GO:0000028	ribosomal small subunit assembly	-8.3	RPSA|RPL38|RPS5|RPS14|RPS15|RPS19|RPS27|RPS28|RPS27L|MRPS11	-6.1
GO Biological Processes	GO:0016072	rRNA metabolic process	-7.2	PIN4|RPL5|RPL7|RPL11|RPL26|RPL27|RPL35A|RPS7|RPS8|RPS14|RPS15|RPS16|RPS17|RPS19|RPS21|RPS24|RPS25|RPS27|RPS28|MPHOSPH6|NSA2|C1D|RPP30|RPL35|EXOSC8|EXOSC7|UTP18|POP5|TRMT112|LYAR|RIOK2|EXOSC5|MRPS11|ERI3|SLX9|GTF2H5	-4.9
GO Biological Processes	GO:0042255	ribosome assembly	-7.2	RPSA|RPL5|RPL10|RPL11|RPL23A|RPL24|RPL38|RPS5|RPS14|RPS15|RPS19|RPS27|RPS28|RPS27L|MRPL20|MRPS11	-4.9
GO Biological Processes	GO:0034654	nucleobase-containing compound biosynthetic process	-6.9	ADSL|NUDT2|ATP5F1A|ATP5F1D|ATP5F1E|ATP5MC1|ATP5MC2|ATP5MC3|ATP5ME|ATP5PF|ATP5PO|CDK7|NDUFA1|NDUFA2|NDUFA3|NDUFA6|NDUFA7|NDUFA8|NDUFA9|NDUFB1|NDUFB2|NDUFB4|NDUFB5|NDUFB8|NDUFB9|NDUFB10|NDUFC2|NDUFS4|NDUFS5|NDUFS6|NME2|POLE|POLR2F|POLR2G|POLR2I|RFC3|SDHD|SYCP1|TAF10|TAF11|TCEA1|SLC22A13|MED21|MED7|ATP5MF|ATP5MJ|ATP5PD|ATP5MG|HSF2BP|QPRT|MED4|NME7|POLR1H|SLC35B3|NDUFA13|SEPSECS|ADA2|NDUFB11|NADSYN1|…	-4.7
GO Biological Processes	GO:0033617	mitochondrial cytochrome c oxidase assembly	-6.7	BCS1L|SURF1|COX17|COX16|COX14|COX20|SMIM20|COA5|PET100	-4.5
GO Biological Processes	GO:1902600	proton transmembrane transport	-6.3	ATP5F1A|ATP5MC1|ATP5MC2|ATP5MC3|ATP5PO|COX5B|COX6B1|COX7A1|COX7B|COX15|COX3|SLC25A3|SURF1|UQCRFS1|UQCRH|COX7A2L|ATP6V1F|COX5A|ATP5MF|UQCR10|ATP6V1H|NDUFS7	-4.1
GO Biological Processes	GO:1904667	negative regulation of ubiquitin protein ligase activity	-6	RPL5|RPL11|RPL37|RPS7|RPS15|RPS20|RPL23	-3.8
GO Biological Processes	GO:0097237	cellular response to toxic substance	-5.4	ADH5|ESD|GSTM3|HBB|MGST1|MGST2|MGST3|PRKN|TXN|SELENOF|GSTO1|PRDX6|AKR1A1|PRDX4|PARK7|PRDX5|PRXL2A|TXNDC17	-3.2
GO Biological Processes	GO:1990748	cellular detoxification	-5.3	ADH5|ESD|GSTM3|HBB|MGST1|MGST2|MGST3|TXN|SELENOF|GSTO1|PRDX6|AKR1A1|PRDX4|PARK7|PRDX5|PRXL2A|TXNDC17	-3.1
GO Biological Processes	GO:0090407	organophosphate biosynthetic process	-5	ADSL|NUDT2|APOA2|ATP5F1A|ATP5F1D|ATP5F1E|ATP5MC1|ATP5MC2|ATP5MC3|ATP5ME|ATP5PF|ATP5PO|NDUFA1|NDUFA2|NDUFA3|NDUFA6|NDUFA7|NDUFA8|NDUFA9|NDUFB1|NDUFB2|NDUFB4|NDUFB5|NDUFB8|NDUFB9|NDUFB10|NDUFC2|NDUFS4|NDUFS5|NDUFS6|NME2|SDHD|SLC22A13|ATP5MF|ATP5MJ|AKR1A1|PEMT|ATP5PD|ATP5MG|QPRT|NME7|SLC35B3|NDUFA13|ACP6|NDUFB11|NADSYN1|NDUFA12|PPCDC|SLC44A4|ATP5MK|TAMM41|UPRT|NDUFS7|UQCC3	-2.9
GO Biological Processes	GO:0098754	detoxification	-5	ADH5|ESD|GSTM3|HBB|MGST1|MGST2|MGST3|SLC22A5|TXN|SELENOF|GSTO1|PRDX6|AKR1A1|PRDX4|PARK7|PRDX5|PRXL2A|TXNDC17	-2.8
GO Biological Processes	GO:0034470	ncRNA processing	-4.8	HNRNPA2B1|PIN4|RPL5|RPL7|RPL11|RPL26|RPL27|RPL35A|RPS7|RPS8|RPS14|RPS15|RPS16|RPS17|RPS19|RPS21|RPS24|RPS25|RPS27|RPS28|TARBP2|MPHOSPH6|NSA2|C1D|RPP30|RPL35|EXOSC8|EXOSC7|UTP18|POP5|TRMT112|TRMT10C|ELP2|LYAR|RIOK2|EXOSC5|MRPS11|ERI3|SLX9|TRMT61A|METTL6|GTF2H5	-2.6
GO Biological Processes	GO:0006122	mitochondrial electron transport, ubiquinol to cytochrome c	-4.7	UQCRFS1|UQCRH|UQCRQ|UQCR10|CYCS|UQCC3	-2.5
GO Biological Processes	GO:0051444	negative regulation of ubiquitin-protein transferase activity	-4.7	RPL5|RPL11|RPL37|RPS7|RPS15|RPS20|RPL23|PARK7	-2.5
GO Biological Processes	GO:0022618	ribonucleoprotein complex assembly	-4.4	RPSA|RPL5|RPL10|RPL11|RPL23A|RPL24|RPL38|RPS5|RPS14|RPS15|RPS19|RPS27|RPS28|SRSF6|SNRPD2|SNRPF|SNRPG|TARBP2|RBM5|EIF3M|EIF3K|MCTS1|RPS27L|MRPL20|MRPS11	-2.2
GO Biological Processes	GO:0071826	ribonucleoprotein complex subunit organization	-4.1	RPSA|RPL5|RPL10|RPL11|RPL23A|RPL24|RPL38|RPS5|RPS14|RPS15|RPS19|RPS27|RPS28|SRSF6|SNRPD2|SNRPF|SNRPG|TARBP2|RBM5|EIF3M|EIF3K|MCTS1|RPS27L|MRPL20|MRPS11	-2
GO Biological Processes	GO:0042273	ribosomal large subunit biogenesis	-4.1	RPL5|RPL7|RPL10|RPL11|RPL23A|RPL24|RPL26|RPL35A|RPL38|NSA2|RPL35|MRPL20|MALSU1	-1.9
GO Biological Processes	GO:1905907	negative regulation of amyloid fibril formation	-4	PFDN1|PFDN4|PFDN5|VBP1|PFDN6	-1.9
GO Biological Processes	GO:0017062	respiratory chain complex III assembly	-4	BCS1L|UQCRFS1|UQCC2|C12orf73|UQCC3	-1.9
GO Biological Processes	GO:0034551	mitochondrial respiratory chain complex III assembly	-4	BCS1L|UQCRFS1|UQCC2|C12orf73|UQCC3	-1.9
GO Biological Processes	GO:0034660	ncRNA metabolic process	-4	CDK7|HNRNPA2B1|PIN4|RPL5|RPL7|RPL11|RPL26|RPL27|RPL35A|RPS7|RPS8|RPS14|RPS15|RPS16|RPS17|RPS19|RPS21|RPS24|RPS25|RPS27|RPS28|TARBP2|MPHOSPH6|NSA2|C1D|RPP30|RPL35|EXOSC8|EXOSC7|HARS2|SEPSECS|UTP18|POP5|TRMT112|TRMT10C|ELP2|QRSL1|LYAR|RIOK2|EXOSC5|RARS2|MRPS11|ERI3|TARS2|SLX9|TRMT61A|METTL6|GTF2H5	-1.9
GO Biological Processes	GO:1901137	carbohydrate derivative biosynthetic process	-3.9	ADSL|NUDT2|ATP5F1A|ATP5F1D|ATP5F1E|ATP5MC1|ATP5MC2|ATP5MC3|ATP5ME|ATP5PF|ATP5PO|NDUFA1|NDUFA2|NDUFA3|NDUFA6|NDUFA7|NDUFA8|NDUFA9|NDUFB1|NDUFB2|NDUFB4|NDUFB5|NDUFB8|NDUFB9|NDUFB10|NDUFC2|NDUFS4|NDUFS5|NDUFS6|NME2|SDHD|VEGFB|OGT|B3GALNT1|ATP5MF|ATP5MJ|AKR1A1|ATP5PD|ATP5MG|NME7|SLC35B3|NDUFA13|ADA2|NDUFB11|NDUFA12|PPCDC|SLC39A8|ATP5MK|UPRT|MGAT4D|KRTCAP2|NDUFS7|UQCC3	-1.8
GO Biological Processes	GO:1903321	negative regulation of protein modification by small protein conjugation or removal	-3.9	TSPO|CAMLG|PPIA|RPL5|RPL11|RPL37|RPS3|RPS7|RPS15|RPS20|OGT|RPL23|ATG5|PARK7|COPS9	-1.8
GO Biological Processes	GO:0031397	negative regulation of protein ubiquitination	-3.8	TSPO|CAMLG|PPIA|RPL5|RPL11|RPL37|RPS3|RPS7|RPS15|RPS20|OGT|RPL23|ATG5|PARK7	-1.7
GO Biological Processes	GO:0098869	cellular oxidant detoxification	-3.8	HBB|MGST1|MGST2|MGST3|TXN|SELENOF|GSTO1|PRDX6|PRDX4|PARK7|PRDX5|PRXL2A|TXNDC17	-1.7
GO Biological Processes	GO:1904666	regulation of ubiquitin protein ligase activity	-3.7	RPL5|RPL11|RPL37|RPS7|RPS15|RPS20|RPL23	-1.6
GO Biological Processes	GO:0009636	response to toxic substance	-3.7	ADH5|ALAD|CDK1|ESD|GSTM3|HBB|MGMT|MGST1|MGST2|MGST3|PRKN|PON1|SLC22A5|TXN|SELENOF|GSTO1|PRDX6|AKR1A1|PRDX4|PARK7|PRDX5|HTRA2|PRXL2A|TXNDC17	-1.6
GO Biological Processes	GO:0097250	mitochondrial respirasome assembly	-3.7	COX7A1|COX7A2P2|COX7A2L|RAB5IF	-1.6
GO Biological Processes	GO:0007007	inner mitochondrial membrane organization	-3.7	MTX2|TIMM10B|NDUFA13|MAIP1|MICOS13|CIBAR1|MTX3|MICOS10|UQCC3	-1.6
GO Biological Processes	GO:1901661	quinone metabolic process	-3.7	NDUFA9|AKR7A2|AKR1A1|PDSS1|COQ2|COQ6|VKORC1|COQ5	-1.6
GO Biological Processes	GO:0070585	protein localization to mitochondrion	-3.6	BCS1L|TSPO|HSPD1|PRKN|TIMM17A|MTX2|MTCH2|TIMM10B|NDUFA13|TOMM7|MAIP1|MGARP|IMMP1L	-1.5
GO Biological Processes	GO:0000027	ribosomal large subunit assembly	-3.5	RPL5|RPL10|RPL11|RPL23A|RPL24|RPL38|MRPL20	-1.4
GO Biological Processes	GO:1901798	positive regulation of signal transduction by p53 class mediator	-3.3	RPL26|RPL37|RPS7|RPS15|RPS20|RPL23|CDK5RAP3	-1.3
GO Biological Processes	GO:1905906	regulation of amyloid fibril formation	-3.3	PFDN1|PFDN4|PFDN5|VBP1|PFDN6	-1.3
GO Biological Processes	GO:0030490	maturation of SSU-rRNA	-3.2	RPS8|RPS14|RPS16|RPS19|RPS21|RPS28|RIOK2|MRPS11|SLX9|GTF2H5	-1.2
GO Biological Processes	GO:0046185	aldehyde catabolic process	-3.1	ADH5|ALDH2|ESD|AKR1A1|PARK7	-1.1
GO Biological Processes	GO:0043461	proton-transporting ATP synthase complex assembly	-3.1	ATP5F1D|TMEM70|ATP23|FMC1	-1
GO Biological Processes	GO:0110095	cellular detoxification of aldehyde	-3.1	ADH5|ESD|AKR1A1|PARK7	-1
GO Biological Processes	GO:0033615	mitochondrial proton-transporting ATP synthase complex assembly	-3.1	ATP5F1D|TMEM70|ATP23|FMC1	-1
GO Biological Processes	GO:2000435	negative regulation of protein neddylation	-3	RPL5|RPL11|COPS9	-1
GO Biological Processes	GO:0050821	protein stabilization	-3	AFM|APOA2|CAMLG|CDK7|HSPD1|PRKN|PFDN1|PFDN4|PFDN5|RPL5|RPL11|RPS7|SUMO1|VBP1|UXT|PER3|RPL23|RASSF2|PFDN6|PARK7|HYPK|GBA3|ZSWIM7	-0.93
GO Biological Processes	GO:0031647	regulation of protein stability	-2.9	AFM|APOA2|CAMLG|CDK7|HSPD1|LSS|PRKN|PFDN1|PFDN4|PFDN5|RPL5|RPL11|RPS7|SUMO1|VBP1|SERF1A|UXT|HDAC3|PER3|RPL23|RASSF2|SERF2|PFDN6|PARK7|TARDBP|HYPK|TOMM7|QRSL1|GBA3|TMEM25|ZSWIM7	-0.91
GO Biological Processes	GO:0042180	cellular ketone metabolic process	-2.9	KYAT1|NDUFA9|AKR7A2|AKR1A1|PARK7|PDSS1|COQ2|COQ6|KYAT3|VKORC1|COQ5	-0.91
GO Biological Processes	GO:0007006	mitochondrial membrane organization	-2.9	BCS1L|VDAC2|MTX2|TIMM10B|NDUFA13|TOMM7|MAIP1|ATP5IF1|MICOS13|CIBAR1|BLOC1S2|MTX3|CHCHD10|MICOS10|UQCC3	-0.89
GO Biological Processes	GO:0006367	transcription initiation from RNA polymerase II promoter	-2.9	CDK7|POLR2G|POLR2I|TAF10|TAF11|MED21|MED7|MED4|MED30|MED11|GTF2H5	-0.86
GO Biological Processes	GO:0072655	establishment of protein localization to mitochondrion	-2.9	BCS1L|TSPO|HSPD1|TIMM17A|MTX2|TIMM10B|NDUFA13|TOMM7|MAIP1|MGARP|IMMP1L	-0.86
GO Biological Processes	GO:0000462	maturation of SSU-rRNA from tricistronic rRNA transcript (SSU-rRNA, 5.8S rRNA, LSU-rRNA)	-2.9	RPS8|RPS14|RPS16|RPS19|RPS21|MRPS11|SLX9|GTF2H5	-0.86
GO Biological Processes	GO:0099022	vesicle tethering	-2.8	TRAPPC2|TRAPPC4|TRAPPC2L|WDR11|C17orf75|TRAPPC6A|TRAPPC13	-0.8
GO Biological Processes	GO:0070071	proton-transporting two-sector ATPase complex assembly	-2.8	ATP5F1D|TMEM70|ATP23|TMEM199|FMC1	-0.8
GO Biological Processes	GO:0006744	ubiquinone biosynthetic process	-2.8	NDUFA9|PDSS1|COQ2|COQ6|COQ5	-0.8
GO Biological Processes	GO:1901663	quinone biosynthetic process	-2.8	NDUFA9|PDSS1|COQ2|COQ6|COQ5	-0.8
GO Biological Processes	GO:0006694	steroid biosynthetic process	-2.7	TSPO|CYP51A1|FDFT1|FDX1|HSD17B2|LSS|HSD17B8|EBP|ERG28|NSDHL|HINT2|SDR42E1|OSBPL7	-0.73
GO Biological Processes	GO:0006839	mitochondrial transport	-2.7	BCS1L|TSPO|HSPD1|PRKN|VDAC2|TIMM17A|MTX2|TIMM10B|NDUFA13|TMEM14C|TOMM7|MAIP1|MGARP|ATP5IF1|IMMP1L|BLOC1S2|CHCHD10	-0.69
GO Biological Processes	GO:0031125	rRNA 3'-end processing	-2.6	RPS21|EXOSC8|EXOSC7|ERI3	-0.67
GO Biological Processes	GO:0006783	heme biosynthetic process	-2.5	ALAD|TSPO|COX15|TMEM14C|ATP5IF1|SRRD	-0.58
GO Biological Processes	GO:0062125	regulation of mitochondrial gene expression	-2.5	MTG2|TRMT10C|UQCC2|MTG1|MALSU1|CHCHD10	-0.58
GO Biological Processes	GO:0006743	ubiquinone metabolic process	-2.5	NDUFA9|PDSS1|COQ2|COQ6|COQ5	-0.56
GO Biological Processes	GO:0044282	small molecule catabolic process	-2.5	ADH5|ALDH2|KYAT1|ESD|ETFA|ETFB|GALE|GALK1|HNMT|INPP5B|PHYH|PON1|TST|DDO|AKR1A1|FTCD|NUDT5|PARK7|QPRT|DECR2|HIBCH|DERA|SCLY|ADA2|NAGK|KYAT3|BDH2|MCEE|HYKK|NUDT7|IDNK	-0.55
GO Biological Processes	GO:0051438	regulation of ubiquitin-protein transferase activity	-2.5	RPL5|RPL11|RPL37|RPS2|RPS7|RPS15|RPS20|RPL23|PARK7	-0.53
GO Biological Processes	GO:0000460	maturation of 5.8S rRNA	-2.4	RPS21|MPHOSPH6|NSA2|C1D|EXOSC8|EXOSC7|ERI3	-0.5
GO Biological Processes	GO:0033013	tetrapyrrole metabolic process	-2.4	ALAD|TSPO|COX15|TMEM14C|BDH2|AMN|ATP5IF1|MMAB|SRRD	-0.48
GO Biological Processes	GO:0090151	establishment of protein localization to mitochondrial membrane	-2.4	BCS1L|MTX2|TIMM10B|NDUFA13|TOMM7|MAIP1	-0.42
GO Biological Processes	GO:0042178	xenobiotic catabolic process	-2.3	FMO4|GSTM3|NR1I2|GSTO1	-0.38
GO Biological Processes	GO:0006626	protein targeting to mitochondrion	-2.3	TSPO|HSPD1|TIMM17A|MTX2|TIMM10B|NDUFA13|TOMM7|MGARP|IMMP1L	-0.38
GO Biological Processes	GO:0042168	heme metabolic process	-2.3	ALAD|TSPO|COX15|TMEM14C|BDH2|ATP5IF1|SRRD	-0.37
GO Biological Processes	GO:0045454	cell redox homeostasis	-2.3	TXN|PRDX6|PRDX4|PRDX5|GLRX2|GLRX5|BOLA3	-0.37
GO Biological Processes	GO:2000434	regulation of protein neddylation	-2.3	RPL5|RPL11|COPS5|COPS4|COPS9	-0.37
GO Biological Processes	GO:0042181	ketone biosynthetic process	-2.3	NDUFA9|PDSS1|COQ2|COQ6|COQ5	-0.37
GO Biological Processes	GO:0006354	DNA-templated transcription, elongation	-2.2	POLR2I|TCEA1|ELP2|ENY2|TEFM|ELOF1|GTF2H5	-0.31
GO Biological Processes	GO:0046148	pigment biosynthetic process	-2.2	ALAD|TSPO|COX15|TMEM14C|ATP5IF1|MFSD12|SRRD	-0.31
GO Biological Processes	GO:0010822	positive regulation of mitochondrion organization	-2.2	PRKN|SSBP1|PDCD5|PARK7|FAM162A|HTRA2|MGARP|ATP5IF1|MIEF2|CHCHD10	-0.28
GO Biological Processes	GO:0070129	regulation of mitochondrial translation	-2.2	MTG2|TRMT10C|UQCC2|MTG1|MALSU1	-0.28
GO Biological Processes	GO:0033014	tetrapyrrole biosynthetic process	-2.2	ALAD|TSPO|COX15|TMEM14C|ATP5IF1|SRRD	-0.28
GO Biological Processes	GO:0006779	porphyrin-containing compound biosynthetic process	-2.2	ALAD|TSPO|COX15|TMEM14C|ATP5IF1|SRRD	-0.28
GO Biological Processes	GO:1904923	regulation of autophagy of mitochondrion in response to mitochondrial depolarization	-2.2	PRKN|HTRA2|TOMM7|ATP5IF1	-0.27
GO Biological Processes	GO:0006749	glutathione metabolic process	-2.2	GGT1|GSTA4|GSTM3|MGST2|GSTO1|PARK7|ETHE1|GLRX2	-0.27
GO Biological Processes	GO:1901401	regulation of tetrapyrrole metabolic process	-2.2	TMEM14C|CLYBL|SRRD	-0.27
GO Biological Processes	GO:0043562	cellular response to nitrogen levels	-2.2	ATG5|GABARAPL2|MAP1LC3B	-0.27
GO Biological Processes	GO:0006995	cellular response to nitrogen starvation	-2.2	ATG5|GABARAPL2|MAP1LC3B	-0.27
GO Biological Processes	GO:0034475	U4 snRNA 3'-end processing	-2.2	EXOSC8|EXOSC7|EXOSC5	-0.27
GO Biological Processes	GO:0036261	7-methylguanosine cap hypermethylation	-2.2	SNRPD2|SNRPF|SNRPG	-0.27
GO Biological Processes	GO:0006729	tetrahydrobiopterin biosynthetic process	-2.2	PTS|SPR|PCBD2	-0.27
GO Biological Processes	GO:0002082	regulation of oxidative phosphorylation	-2.1	COX7A1|COX7A2P2|COX7A2L|MLXIPL|UQCC2	-0.21
GO Biological Processes	GO:1901796	regulation of signal transduction by p53 class mediator	-2.1	PRKN|MAP2K6|RPL5|RPL11|RPL26|RPL37|RPS7|RPS15|RPS20|RPL23|TRIAP1|CDK5RAP3	-0.18
GO Biological Processes	GO:1903715	regulation of aerobic respiration	-2	COX7A1|COX7A2P2|COX7A2L|PARK7|MLXIPL|UQCC2	-0.16
GO Biological Processes	GO:1903051	negative regulation of proteolysis involved in cellular protein catabolic process	-2	ALAD|CAMLG|RPL5|RPL11|RPS7|OGT|RPL23|PARK7|GABARAPL2	-0.13
GO Cellular Components	GO:0044391	ribosomal subunit	-68	RPSA|RPL5|RPL7|RPL9|RPL10|RPL11|RPL12|RPL13|RPL17|RPL18|RPL18A|RPL21|RPL22|RPL23A|MRPL23|RPL24|RPL26|RPL27|RPL30|RPL27A|RPL29|RPL31|RPL32|RPL34|RPL35A|RPL37|RPL37A|RPL38|RPL39|RPL36A|RPLP2|RPS2|RPS3|RPS3A|RPS5|RPS7|RPS8|RPS9|RPS10|RPS12|RPS13|RPS14|RPS15|RPS16|RPS17|RPS18|RPS19|RPS20|RPS21|RPS23|RPS24|RPS25|RPS27|RPS27A|RPS28|RPS29|UBA52|RPL23|MRPL33|MRPL19|RACK1|MRPL3|RPL35|RPL36|MRPS28|MRPL42|M…	-64
GO Cellular Components	GO:0005840	ribosome	-66	BTF3|RPSA|NDUFA7|RPL5|RPL7|RPL9|RPL10|RPL11|RPL12|RPL13|RPL17|RPL18|RPL18A|RPL21|RPL22|RPL23A|MRPL23|RPL24|RPL26|RPL27|RPL30|RPL27A|RPL29|RPL31|RPL32|RPL34|RPL35A|RPL37|RPL37A|RPL38|RPL39|RPL36A|RPLP2|RPS2|RPS3|RPS3A|RPS5|RPS7|RPS8|RPS9|RPS10|RPS12|RPS13|RPS14|RPS15|RPS16|RPS17|RPS18|RPS19|RPS20|RPS21|RPS23|RPS24|RPS25|RPS27|RPS27A|RPS28|RPS29|UBA52|RPL23|MRPL33|MRPL19|RACK1|MRPL3|RPL35|RPL36|MTG…	-63
GO Cellular Components	GO:0005743	mitochondrial inner membrane	-56	ATP5F1A|ATP5F1D|ATP5F1E|ATP5MC1|ATP5MC2|ATP5MC3|ATP5ME|ATP5PF|ATP5PO|BCS1L|COX5B|COX6B1|COX6C|COX7A1|COX7A2P2|COX7B|COX15|HSPD1|LDHB|COX3|NDUFA1|NDUFA2|NDUFA3|NDUFA4|NDUFA6|NDUFA7|NDUFA8|NDUFA9|NDUFB1|NDUFB2|NDUFB4|NDUFB5|NDUFB8|NDUFB9|NDUFB10|NDUFC2|NDUFS4|NDUFS5|NDUFS6|SLC25A3|MRPL23|RPS3|SDHD|SURF1|UQCRFS1|UQCRH|COX7A2L|COX5A|ATP5MF|MRPL33|ATP5MJ|MRPL19|TIMM17A|ATP5PD|ATP5MG|MTX2|MRPL3|MTG2|TI…	-52
GO Cellular Components	GO:0022626	cytosolic ribosome	-53	RPSA|RPL5|RPL7|RPL9|RPL10|RPL11|RPL12|RPL13|RPL17|RPL18|RPL18A|RPL21|RPL22|RPL23A|RPL24|RPL26|RPL27|RPL30|RPL27A|RPL29|RPL31|RPL32|RPL34|RPL35A|RPL37|RPL37A|RPL38|RPL39|RPL36A|RPLP2|RPS2|RPS3|RPS3A|RPS5|RPS7|RPS8|RPS9|RPS10|RPS12|RPS13|RPS14|RPS15|RPS16|RPS17|RPS18|RPS19|RPS20|RPS21|RPS23|RPS24|RPS25|RPS27|RPS27A|RPS28|RPS29|UBA52|RPL23|RACK1|RPL35|RPL36|RPS27L|MRPS11	-50
GO Cellular Components	GO:0005740	mitochondrial envelope	-52	ATP5F1A|ATP5F1D|ATP5F1E|ATP5MC1|ATP5MC2|ATP5MC3|ATP5ME|ATP5PF|ATP5PO|BCS1L|TSPO|COX5B|COX6B1|COX6C|COX7A1|COX7A2P2|COX7B|COX15|HSPD1|LDHB|MGST1|COX3|NDUFA1|NDUFA2|NDUFA3|NDUFA4|NDUFA6|NDUFA7|NDUFA8|NDUFA9|NDUFB1|NDUFB2|NDUFB4|NDUFB5|NDUFB8|NDUFB9|NDUFB10|NDUFC2|NDUFS4|NDUFS5|NDUFS6|PRKN|SLC25A3|MRPL23|RPS3|RPS27A|SDHD|SURF1|UBA52|UBC|UQCRFS1|UQCRH|VDAC2|HSD17B8|OGT|RNASET2|COX7A2L|COX5A|ATP5MF|MR…	-48
GO Cellular Components	GO:0019866	organelle inner membrane	-51	ATP5F1A|ATP5F1D|ATP5F1E|ATP5MC1|ATP5MC2|ATP5MC3|ATP5ME|ATP5PF|ATP5PO|BCS1L|COX5B|COX6B1|COX6C|COX7A1|COX7A2P2|COX7B|COX15|HSPD1|LDHB|COX3|NDUFA1|NDUFA2|NDUFA3|NDUFA4|NDUFA6|NDUFA7|NDUFA8|NDUFA9|NDUFB1|NDUFB2|NDUFB4|NDUFB5|NDUFB8|NDUFB9|NDUFB10|NDUFC2|NDUFS4|NDUFS5|NDUFS6|SLC25A3|MRPL23|RPS3|SDHD|SURF1|UQCRFS1|UQCRH|COX7A2L|COX5A|ATP5MF|MRPL33|ATP5MJ|MRPL19|TIMM17A|ATP5PD|ATP5MG|MTX2|MRPL3|UNC50|M…	-47
GO Cellular Components	GO:0031966	mitochondrial membrane	-50	ATP5F1A|ATP5F1D|ATP5F1E|ATP5MC1|ATP5MC2|ATP5MC3|ATP5ME|ATP5PF|ATP5PO|BCS1L|TSPO|COX5B|COX6B1|COX6C|COX7A1|COX7A2P2|COX7B|COX15|HSPD1|LDHB|MGST1|COX3|NDUFA1|NDUFA2|NDUFA3|NDUFA4|NDUFA6|NDUFA7|NDUFA8|NDUFA9|NDUFB1|NDUFB2|NDUFB4|NDUFB5|NDUFB8|NDUFB9|NDUFB10|NDUFC2|NDUFS4|NDUFS5|NDUFS6|PRKN|SLC25A3|MRPL23|RPS3|RPS27A|SDHD|SURF1|UBA52|UBC|UQCRFS1|UQCRH|VDAC2|OGT|COX7A2L|COX5A|ATP5MF|MRPL33|ATP5MJ|MRPL…	-46
GO Cellular Components	GO:0098798	mitochondrial protein-containing complex	-48	ATP5F1A|ATP5F1D|ATP5F1E|ATP5MC1|ATP5MC2|ATP5MC3|ATP5ME|ATP5PF|ATP5PO|BCS1L|COX5B|COX6B1|COX6C|COX7A1|COX7A2P2|COX7B|COX3|NDUFA1|NDUFA2|NDUFA3|NDUFA4|NDUFA6|NDUFA7|NDUFA8|NDUFA9|NDUFB1|NDUFB2|NDUFB4|NDUFB5|NDUFB8|NDUFB9|NDUFB10|NDUFC2|NDUFS4|NDUFS5|NDUFS6|MRPL23|SDHD|UQCRFS1|UQCRH|COX7A2L|COX5A|ATP5MF|MRPL33|ATP5MJ|MRPL19|TIMM17A|ATP5PD|ATP5MG|MTX2|MRPL3|TIMM10B|UQCRQ|MRPS28|MRPL42|MRPL13|MRPL18|U…	-44
GO Cellular Components	GO:0015934	large ribosomal subunit	-41	RPL5|RPL7|RPL9|RPL10|RPL11|RPL12|RPL13|RPL17|RPL18|RPL18A|RPL21|RPL22|RPL23A|MRPL23|RPL24|RPL26|RPL27|RPL30|RPL27A|RPL29|RPL31|RPL32|RPL34|RPL35A|RPL37|RPL37A|RPL38|RPL39|RPL36A|RPLP2|UBA52|RPL23|MRPL33|MRPL19|MRPL3|RPL35|RPL36|MRPL42|MRPL13|MRPL18|MRPL2|MRPL51|MRPL27|MRPL39|MRPL50|MRPL20|MRPL47|MRPL14|MRPL36|MRPL34|MRPL11|MRPL9|MRPL43|MRPL54|MRPL52|MRPL21	-38
GO Cellular Components	GO:1990904	ribonucleoprotein complex	-37	BTF3|CIRBP|HNRNPA1|HNRNPA2B1|HNRNPH1|RPSA|RPL5|RPL7|RPL9|RPL10|RPL11|RPL12|RPL13|RPL17|RPL18|RPL18A|RPL21|RPL22|RPL23A|MRPL23|RPL24|RPL26|RPL27|RPL30|RPL27A|RPL29|RPL31|RPL32|RPL34|RPL35A|RPL37|RPL37A|RPL38|RPL39|RPL36A|RPLP2|RPS2|RPS3|RPS3A|RPS5|RPS7|RPS8|RPS9|RPS10|RPS12|RPS13|RPS14|RPS15|RPS16|RPS17|RPS18|RPS19|RPS20|RPS21|RPS23|RPS24|RPS25|RPS27|RPS27A|RPS28|RPS29|SNRNP70|SNRPA1|SNRPD2|SNRPF|…	-34
GO Cellular Components	GO:0098800	inner mitochondrial membrane protein complex	-36	ATP5F1A|ATP5F1D|ATP5F1E|ATP5MC1|ATP5MC2|ATP5MC3|ATP5ME|ATP5PF|ATP5PO|BCS1L|COX5B|COX6B1|COX6C|COX7A1|COX7A2P2|COX7B|COX3|NDUFA1|NDUFA2|NDUFA3|NDUFA4|NDUFA6|NDUFA7|NDUFA8|NDUFA9|NDUFB1|NDUFB2|NDUFB4|NDUFB5|NDUFB8|NDUFB9|NDUFB10|NDUFC2|NDUFS4|NDUFS5|NDUFS6|SDHD|UQCRFS1|UQCRH|COX7A2L|COX5A|ATP5MF|ATP5MJ|TIMM17A|ATP5PD|ATP5MG|MTX2|TIMM10B|UQCRQ|UQCR10|NDUFA13|NDUFB11|NDUFA12|ATP5MK|SMDT1|MICOS13|IMMP…	-33
GO Cellular Components	GO:0022627	cytosolic small ribosomal subunit	-29	RPSA|RPS2|RPS3|RPS3A|RPS5|RPS7|RPS8|RPS9|RPS10|RPS12|RPS13|RPS14|RPS15|RPS16|RPS17|RPS18|RPS19|RPS20|RPS21|RPS23|RPS24|RPS25|RPS27|RPS27A|RPS28|RPS29|UBA52|RACK1|RPS27L|MRPS11	-26
GO Cellular Components	GO:0070469	respirasome	-29	BCS1L|COX5B|COX6B1|COX6C|COX7A1|COX7A2P2|COX7B|COX15|COX3|NDUFA1|NDUFA2|NDUFA3|NDUFA4|NDUFA6|NDUFA7|NDUFA8|NDUFA9|NDUFB1|NDUFB2|NDUFB4|NDUFB5|NDUFB8|NDUFB9|NDUFB10|NDUFC2|NDUFS4|NDUFS5|NDUFS6|SDHD|SURF1|UQCRFS1|UQCRH|COX7A2L|COX5A|UQCRQ|UQCR10|NDUFA13|CYCS|NDUFB11|NDUFA12|RAB5IF|NDUFS7|COA6	-26
GO Cellular Components	GO:0015935	small ribosomal subunit	-28	RPSA|RPS2|RPS3|RPS3A|RPS5|RPS7|RPS8|RPS9|RPS10|RPS12|RPS13|RPS14|RPS15|RPS16|RPS17|RPS18|RPS19|RPS20|RPS21|RPS23|RPS24|RPS25|RPS27|RPS27A|RPS28|RPS29|UBA52|RACK1|MRPS28|MRPL42|MRPS18C|RPS27L|MRPS23|MRPS33|AURKAIP1|MRPS14|MRPS11|MRPS6	-25
GO Cellular Components	GO:0005746	mitochondrial respirasome	-28	BCS1L|COX5B|COX6B1|COX6C|COX7A1|COX7A2P2|COX7B|COX15|COX3|NDUFA1|NDUFA2|NDUFA3|NDUFA4|NDUFA6|NDUFA7|NDUFA8|NDUFA9|NDUFB1|NDUFB2|NDUFB4|NDUFB5|NDUFB8|NDUFB9|NDUFB10|NDUFC2|NDUFS4|NDUFS5|NDUFS6|SDHD|SURF1|UQCRFS1|UQCRH|COX7A2L|COX5A|UQCRQ|UQCR10|NDUFA13|NDUFB11|NDUFA12|RAB5IF|NDUFS7	-25
GO Cellular Components	GO:0022625	cytosolic large ribosomal subunit	-27	RPL5|RPL7|RPL9|RPL10|RPL11|RPL12|RPL13|RPL17|RPL18|RPL18A|RPL21|RPL22|RPL23A|RPL24|RPL26|RPL27|RPL30|RPL27A|RPL29|RPL31|RPL32|RPL34|RPL35A|RPL37|RPL37A|RPL38|RPL39|RPL36A|RPLP2|UBA52|RPL23|RPL35|RPL36	-24
GO Cellular Components	GO:0098803	respiratory chain complex	-26	BCS1L|COX5B|COX6B1|COX6C|COX7A1|COX7A2P2|COX7B|COX3|NDUFA1|NDUFA2|NDUFA3|NDUFA4|NDUFA6|NDUFA7|NDUFA8|NDUFA9|NDUFB1|NDUFB2|NDUFB4|NDUFB5|NDUFB8|NDUFB9|NDUFB10|NDUFC2|NDUFS4|NDUFS5|NDUFS6|SDHD|UQCRFS1|UQCRH|COX7A2L|COX5A|UQCRQ|UQCR10|NDUFA13|NDUFB11|NDUFA12|NDUFS7|COA6	-23
GO Cellular Components	GO:0000313	organellar ribosome	-20	NDUFA7|MRPL23|MRPL33|MRPL19|MRPL3|MTG2|MRPS28|MRPL42|MRPL13|MRPL18|MRPS18C|MRPL2|MRPL51|MRPL27|MRPS23|MRPS33|MRPL39|MRPL50|AURKAIP1|MRPL20|MRPL47|MRPS14|MRPL14|MRPS11|MRPS6|MRPL36|MRPL34|MRPL11|MRPL9|MRPL43|MTG1|MRPL54|MRPL52|MRPL21	-18
GO Cellular Components	GO:0005761	mitochondrial ribosome	-20	NDUFA7|MRPL23|MRPL33|MRPL19|MRPL3|MTG2|MRPS28|MRPL42|MRPL13|MRPL18|MRPS18C|MRPL2|MRPL51|MRPL27|MRPS23|MRPS33|MRPL39|MRPL50|AURKAIP1|MRPL20|MRPL47|MRPS14|MRPL14|MRPS11|MRPS6|MRPL36|MRPL34|MRPL11|MRPL9|MRPL43|MTG1|MRPL54|MRPL52|MRPL21	-18
GO Cellular Components	GO:0005759	mitochondrial matrix	-19	ALDH2|NUDT2|ATP5F1A|ATP5F1D|ATP5F1E|CDK1|ETFA|ETFB|FDX1|HSPD1|NDUFA7|NDUFA9|NDUFB8|PIN4|MRPL23|RPS3|SSBP1|TST|VDAC2|HSD17B8|MRPL33|MRPL19|MRPL3|PARK7|HARS2|ETHE1|PDSS1|PRDX5|MTG2|HIBCH|MRPS28|MRPL42|MRPL13|MRPL18|GLRX2|MRPS18C|MRPL2|MECR|ACP6|GLRX5|MRPL51|MRPL27|LIPT1|MRPS23|MRPS33|MRPL39|MRPL50|TRMT10C|AURKAIP1|MRPL20|ABHD10|RARS2|MRPL47|MRPS14|MRPL14|MRPS11|MRPS6|MRPL36|MRPL34|MRPL11|MRPL9|MAIP…	-17
GO Cellular Components	GO:0045271	respiratory chain complex I	-16	NDUFA1|NDUFA2|NDUFA3|NDUFA4|NDUFA6|NDUFA7|NDUFA8|NDUFA9|NDUFB1|NDUFB2|NDUFB4|NDUFB5|NDUFB8|NDUFB9|NDUFB10|NDUFC2|NDUFS4|NDUFS5|NDUFS6|NDUFA13|NDUFB11|NDUFA12|NDUFS7	-14
GO Cellular Components	GO:0005747	mitochondrial respiratory chain complex I	-16	NDUFA1|NDUFA2|NDUFA3|NDUFA4|NDUFA6|NDUFA7|NDUFA8|NDUFA9|NDUFB1|NDUFB2|NDUFB4|NDUFB5|NDUFB8|NDUFB9|NDUFB10|NDUFC2|NDUFS4|NDUFS5|NDUFS6|NDUFA13|NDUFB11|NDUFA12|NDUFS7	-14
GO Cellular Components	GO:0030964	NADH dehydrogenase complex	-16	NDUFA1|NDUFA2|NDUFA3|NDUFA4|NDUFA6|NDUFA7|NDUFA8|NDUFA9|NDUFB1|NDUFB2|NDUFB4|NDUFB5|NDUFB8|NDUFB9|NDUFB10|NDUFC2|NDUFS4|NDUFS5|NDUFS6|NDUFA13|NDUFB11|NDUFA12|NDUFS7	-14
GO Cellular Components	GO:1990204	oxidoreductase complex	-16	BCS1L|ETFA|ETFB|LDHB|NDUFA1|NDUFA2|NDUFA3|NDUFA4|NDUFA6|NDUFA7|NDUFA8|NDUFA9|NDUFB1|NDUFB2|NDUFB4|NDUFB5|NDUFB8|NDUFB9|NDUFB10|NDUFC2|NDUFS4|NDUFS5|NDUFS6|SDHD|UQCRFS1|UQCRH|HSD17B8|NOXA1|UQCRQ|UQCR10|NDUFA13|NDUFB11|NDUFA12|CYB5B|NDUFS7	-13
GO Cellular Components	GO:0005762	mitochondrial large ribosomal subunit	-15	MRPL23|MRPL33|MRPL19|MRPL3|MRPL42|MRPL13|MRPL18|MRPL2|MRPL51|MRPL27|MRPL39|MRPL50|MRPL20|MRPL47|MRPL14|MRPL36|MRPL34|MRPL11|MRPL9|MRPL43|MRPL54|MRPL52|MRPL21	-13
GO Cellular Components	GO:0000315	organellar large ribosomal subunit	-15	MRPL23|MRPL33|MRPL19|MRPL3|MRPL42|MRPL13|MRPL18|MRPL2|MRPL51|MRPL27|MRPL39|MRPL50|MRPL20|MRPL47|MRPL14|MRPL36|MRPL34|MRPL11|MRPL9|MRPL43|MRPL54|MRPL52|MRPL21	-13
GO Cellular Components	GO:0005753	mitochondrial proton-transporting ATP synthase complex	-14	ATP5F1A|ATP5F1D|ATP5F1E|ATP5MC1|ATP5MC2|ATP5MC3|ATP5ME|ATP5PF|ATP5PO|ATP5MF|ATP5MJ|ATP5PD|ATP5MG|ATP5MK	-11
GO Cellular Components	GO:0045259	proton-transporting ATP synthase complex	-13	ATP5F1A|ATP5F1D|ATP5F1E|ATP5MC1|ATP5MC2|ATP5MC3|ATP5ME|ATP5PF|ATP5PO|ATP5MF|ATP5MJ|ATP5PD|ATP5MG|ATP5MK	-11
GO Cellular Components	GO:0042788	polysomal ribosome	-13	BTF3|RPL11|RPL18|RPL18A|RPL24|RPL30|RPL31|RPL32|RPL38|RPL39|RPL36A|RPS21|RPS23|RPS28|RPS29|RPL36	-10
GO Cellular Components	GO:0070069	cytochrome complex	-12	BCS1L|COX5B|COX6B1|COX6C|COX7A1|COX7A2P2|COX7B|COX15|COX3|NDUFA4|UQCRFS1|UQCRH|COX7A2L|COX5A|UQCRQ|UQCR10|COA6	-9.6
GO Cellular Components	GO:0016469	proton-transporting two-sector ATPase complex	-9.6	ATP5F1A|ATP5F1D|ATP5F1E|ATP5MC1|ATP5MC2|ATP5MC3|ATP5ME|ATP5PF|ATP5PO|ATP6V1F|ATP5MF|ATP5MJ|ATP5PD|ATP5MG|ATP6V1H|ATP5MK|TMEM199	-7.3
GO Cellular Components	GO:0000276	mitochondrial proton-transporting ATP synthase complex, coupling factor F(o)	-8.7	ATP5MC1|ATP5MC2|ATP5MC3|ATP5ME|ATP5PF|ATP5PO|ATP5PD|ATP5MG	-6.5
GO Cellular Components	GO:0045277	respiratory chain complex IV	-8.7	COX5B|COX6B1|COX6C|COX7A1|COX7A2P2|COX7B|COX3|NDUFA4|UQCRFS1|COX7A2L|COX5A|COA6	-6.4
GO Cellular Components	GO:0045263	proton-transporting ATP synthase complex, coupling factor F(o)	-8.6	ATP5MC1|ATP5MC2|ATP5MC3|ATP5ME|ATP5PF|ATP5PO|ATP5MF|ATP5PD|ATP5MG	-6.3
GO Cellular Components	GO:0005844	polysome	-8.2	BTF3|RPL11|RPL18|RPL18A|RPL24|RPL30|RPL31|RPL32|RPL38|RPL39|RPL36A|RPS3|RPS21|RPS23|RPS28|RPS29|VBP1|RPL36	-5.9
GO Cellular Components	GO:0005751	mitochondrial respiratory chain complex IV	-8	COX5B|COX6B1|COX6C|COX7A1|COX7A2P2|COX7B|COX3|NDUFA4|UQCRFS1|COX7A2L|COX5A	-5.7
GO Cellular Components	GO:0031305	integral component of mitochondrial inner membrane	-5.3	SLC25A3|TIMM17A|MTX2|COQ2|COX16|SMDT1|SFXN2|MICOS13|MTX3|CHCHD10|MICOS10|UQCC3|PET100	-3.1
GO Cellular Components	GO:0033177	proton-transporting two-sector ATPase complex, proton-transporting domain	-5.3	ATP5MC1|ATP5MC2|ATP5MC3|ATP5ME|ATP5PF|ATP5PO|ATP5MF|ATP5PD|ATP5MG	-3.1
GO Cellular Components	GO:0016272	prefoldin complex	-5.3	PFDN1|PFDN4|PFDN5|VBP1|PFDN6	-3.1
GO Cellular Components	GO:0031304	intrinsic component of mitochondrial inner membrane	-5.2	SLC25A3|TIMM17A|MTX2|COQ2|COX16|SMDT1|SFXN2|MICOS13|MTX3|CHCHD10|MICOS10|UQCC3|PET100	-3
GO Cellular Components	GO:0005839	proteasome core complex	-4.4	PSMA2|PSMA7|PSMB3|PSMB4|PSMB5|PSMB6|PSMB7	-2.2
GO Cellular Components	GO:0000314	organellar small ribosomal subunit	-4.2	MRPS28|MRPL42|MRPS18C|MRPS23|MRPS33|AURKAIP1|MRPS14|MRPS11|MRPS6	-2.1
GO Cellular Components	GO:0005763	mitochondrial small ribosomal subunit	-4.2	MRPS28|MRPL42|MRPS18C|MRPS23|MRPS33|AURKAIP1|MRPS14|MRPS11|MRPS6	-2.1
GO Cellular Components	GO:1905368	peptidase complex	-4.2	MBL2|PSMA2|PSMA7|PSMB3|PSMB4|PSMB5|PSMB6|PSMB7|PSMC2|PSMC6|PSMD8|TAF10|SPCS2|HTRA2|ENY2|SPCS3|PAAF1|SGF29	-2
GO Cellular Components	GO:0032592	integral component of mitochondrial membrane	-4.1	SLC25A3|TIMM17A|MTX2|COQ2|COX16|TMEM70|MGARP|SMDT1|SFXN2|MICOS13|MTX3|CHCHD10|MICOS10|UQCC3|PET100	-2
GO Cellular Components	GO:0098573	intrinsic component of mitochondrial membrane	-4	SLC25A3|TIMM17A|MTX2|COQ2|COX16|TMEM70|MGARP|SMDT1|SFXN2|MICOS13|MTX3|CHCHD10|MICOS10|UQCC3|PET100	-1.9
GO Cellular Components	GO:0005758	mitochondrial intermembrane space	-3.8	NDUFA8|NDUFS5|RNASET2|COX17|PARK7|TIMM10B|HTRA2|CHCHD2|TRIAP1|CYCS|UQCC2|MIX23|COA6|CHCHD10	-1.7
GO Cellular Components	GO:0019774	proteasome core complex, beta-subunit complex	-3.8	PSMB3|PSMB4|PSMB5|PSMB6|PSMB7	-1.7
GO Cellular Components	GO:0045261	proton-transporting ATP synthase complex, catalytic core F(1)	-3.7	ATP5F1A|ATP5F1D|ATP5F1E|ATP5PO	-1.6
GO Cellular Components	GO:0033178	proton-transporting two-sector ATPase complex, catalytic domain	-3.6	ATP5F1A|ATP5F1D|ATP5F1E|ATP5PO|ATP6V1F|ATP6V1H	-1.5
GO Cellular Components	GO:0045275	respiratory chain complex III	-3.5	BCS1L|UQCRFS1|UQCRH|UQCRQ|UQCR10	-1.4
GO Cellular Components	GO:0005750	mitochondrial respiratory chain complex III	-3.5	BCS1L|UQCRFS1|UQCRH|UQCRQ|UQCR10	-1.4
GO Cellular Components	GO:1990072	TRAPPIII protein complex	-3.5	TRAPPC2|TRAPPC4|TRAPPC2L|TRAPPC6A|TRAPPC13	-1.4
GO Cellular Components	GO:0000502	proteasome complex	-3.4	PSMA2|PSMA7|PSMB3|PSMB4|PSMB5|PSMB6|PSMB7|PSMC2|PSMC6|PSMD8|PAAF1	-1.3
GO Cellular Components	GO:1905369	endopeptidase complex	-3.4	MBL2|PSMA2|PSMA7|PSMB3|PSMB4|PSMB5|PSMB6|PSMB7|PSMC2|PSMC6|PSMD8|HTRA2|PAAF1	-1.3
GO Cellular Components	GO:0031314	extrinsic component of mitochondrial inner membrane	-3.3	COQ6|NDUFAF5|COQ5|ATP23|TAMM41	-1.3
GO Cellular Components	GO:0031970	organelle envelope lumen	-3.3	NDUFA8|NDUFS5|RNASET2|COX17|PARK7|TIMM10B|HTRA2|CHCHD2|TRIAP1|CYCS|UQCC2|MIX23|COA6|CHCHD10	-1.2
GO Cellular Components	GO:1990351	transporter complex	-3.2	BCS1L|CLCN1|CLCN2|NDUFA1|NDUFA2|NDUFA3|NDUFA4|NDUFA6|NDUFA7|NDUFA8|NDUFA9|NDUFB1|NDUFB2|NDUFB4|NDUFB5|NDUFB8|NDUFB9|NDUFB10|NDUFC2|NDUFS4|NDUFS5|NDUFS6|PEX12|FXYD1|PTPA|SCN2A|UQCRFS1|UQCRH|TIMM10B|UQCRQ|UQCR10|NDUFA13|NDUFB11|NDUFA12|SMDT1|NDUFS7	-1.2
GO Cellular Components	GO:1902495	transmembrane transporter complex	-3.1	BCS1L|CLCN1|CLCN2|NDUFA1|NDUFA2|NDUFA3|NDUFA4|NDUFA6|NDUFA7|NDUFA8|NDUFA9|NDUFB1|NDUFB2|NDUFB4|NDUFB5|NDUFB8|NDUFB9|NDUFB10|NDUFC2|NDUFS4|NDUFS5|NDUFS6|FXYD1|PTPA|SCN2A|UQCRFS1|UQCRH|UQCRQ|UQCR10|NDUFA13|NDUFB11|NDUFA12|SMDT1|NDUFS7	-1.1
GO Cellular Components	GO:0098556	cytoplasmic side of rough endoplasmic reticulum membrane	-3	RPL27|RPS28|RPS29	-1
GO Cellular Components	GO:0071013	catalytic step 2 spliceosome	-3	HNRNPA1|HNRNPA2B1|HNRNPH1|SNRPA1|SNRPD2|SNRPF|SNRPG|BCAS2|SRRM2|LSM3|LSM7|MAGOHB|HNRNPA3	-0.95
GO Cellular Components	GO:0030008	TRAPP complex	-2.8	TRAPPC2|TRAPPC4|TRAPPC2L|TRAPPC6A|TRAPPC13	-0.8
GO Cellular Components	GO:0000275	mitochondrial proton-transporting ATP synthase complex, catalytic sector F(1)	-2.7	ATP5F1A|ATP5F1D|ATP5F1E	-0.69
GO Cellular Components	GO:0005741	mitochondrial outer membrane	-2.6	ATP5MC2|ATP5MC3|TSPO|MGST1|PRKN|RPS27A|UBA52|UBC|VDAC2|MTX2|SARM1|MTCH2|TOMM7|CISD1|CYB5B|HINT2|MGARP|RTN4IP1|MIEF2|MICOS13|MTX3|MICOS10	-0.66
GO Cellular Components	GO:0030867	rough endoplasmic reticulum membrane	-2.5	RPL27|RPS28|RPS29|SSR4|SEC61B|SEC61G	-0.58
GO Cellular Components	GO:0000178	exosome (RNase complex)	-2.5	MPHOSPH6|C1D|EXOSC8|EXOSC7|EXOSC5	-0.56
GO Cellular Components	GO:1990071	TRAPPII protein complex	-2.5	TRAPPC2|TRAPPC4|TRAPPC2L|TRAPPC13	-0.52
GO Cellular Components	GO:0000176	nuclear exosome (RNase complex)	-2.5	C1D|EXOSC8|EXOSC7|EXOSC5	-0.52
GO Cellular Components	GO:1905354	exoribonuclease complex	-2.4	MPHOSPH6|C1D|EXOSC8|EXOSC7|EXOSC5	-0.46
GO Cellular Components	GO:0071256	translocon complex	-2.4	SSR4|SEC61B|SEC61G	-0.45
GO Cellular Components	GO:0140275	MIB complex	-2.3	MTX2|MICOS13|MTX3|MICOS10	-0.38
GO Cellular Components	GO:0001401	SAM complex	-2.3	MTX2|MICOS13|MTX3|MICOS10	-0.38
GO Cellular Components	GO:0005742	mitochondrial outer membrane translocase complex	-2.3	MTX2|TOMM7|MICOS13|MTX3|MICOS10	-0.37
GO Cellular Components	GO:0098799	outer mitochondrial membrane protein complex	-2.2	MTX2|TOMM7|MICOS13|MTX3|MICOS10	-0.28
GO Cellular Components	GO:0005681	spliceosomal complex	-2.2	CIRBP|HNRNPA1|HNRNPA2B1|HNRNPH1|SNRNP70|SNRPA1|SNRPD2|SNRPF|SNRPG|RBM5|BCAS2|SRRM2|LSM3|TRA2A|LSM7|MAGOHB|CCDC12|DQX1|HNRNPA3	-0.27
GO Cellular Components	GO:0071005	U2-type precatalytic spliceosome	-2.2	SNRPA1|SNRPD2|SNRPF|SNRPG|SRRM2|LSM3|LSM7|MAGOHB	-0.27
GO Cellular Components	GO:0061617	MICOS complex	-2.2	MICOS13|CHCHD10|MICOS10	-0.27
GO Cellular Components	GO:0071011	precatalytic spliceosome	-2.1	SNRPA1|SNRPD2|SNRPF|SNRPG|SRRM2|LSM3|LSM7|MAGOHB	-0.22
GO Cellular Components	GO:0071007	U2-type catalytic step 2 spliceosome	-2.1	SNRPA1|SNRPD2|SNRPF|SNRPG|BCAS2|SRRM2	-0.22
GO Cellular Components	GO:0032994	protein-lipid complex	-2.1	APOA2|APOC1|APOC4|DBI|PON1|PEX3	-0.22
GO Cellular Components	GO:0031968	organelle outer membrane	-2.1	ATP5MC2|ATP5MC3|TSPO|MGST1|PRKN|RPS27A|UBA52|UBC|VDAC2|MTX2|SARM1|MTCH2|TOMM7|CISD1|CYB5B|HINT2|MGARP|RTN4IP1|MIEF2|MICOS13|MTX3|MICOS10	-0.21
GO Cellular Components	GO:0019867	outer membrane	-2.1	ATP5MC2|ATP5MC3|TSPO|MGST1|PRKN|RPS27A|UBA52|UBC|VDAC2|MTX2|SARM1|MTCH2|TOMM7|CISD1|CYB5B|HINT2|MGARP|RTN4IP1|MIEF2|MICOS13|MTX3|MICOS10	-0.19
GO Molecular Functions	GO:0003735	structural constituent of ribosome	-72	RPSA|NDUFA7|RPL5|RPL7|RPL9|RPL10|RPL11|RPL12|RPL13|RPL17|RPL18|RPL18A|RPL21|RPL22|RPL23A|MRPL23|RPL24|RPL26|RPL27|RPL30|RPL27A|RPL29|RPL31|RPL32|RPL34|RPL35A|RPL37|RPL37A|RPL38|RPL39|RPL36A|RPLP2|RPS2|RPS3|RPS3A|RPS5|RPS7|RPS8|RPS9|RPS10|RPS12|RPS13|RPS14|RPS15|RPS16|RPS17|RPS18|RPS19|RPS20|RPS21|RPS23|RPS24|RPS25|RPS27|RPS27A|RPS28|RPS29|UBA52|RPL23|MRPL33|MRPL19|MRPL3|RPL35|RPL36|MRPL42|MRPL13|…	-67
GO Molecular Functions	GO:0009055	electron transfer activity	-26	ADH5|ALDH2|COX5B|COX6B1|COX7A1|COX7A2P2|COX7B|COX15|ETFA|ETFB|FDX1|COX3|NDUFA1|NDUFA2|NDUFA3|NDUFA4|NDUFA6|NDUFA7|NDUFA8|NDUFA9|NDUFB1|NDUFB2|NDUFB4|NDUFB5|NDUFB8|NDUFB9|NDUFB10|NDUFC2|NDUFS4|NDUFS5|NDUFS6|SDHD|SURF1|UQCRFS1|UQCRH|AKR7A2|RDH16|COX7A2L|COX5A|UQCR10|GLRX2|CYCS|NDUFA12|FDX2|NDUFS7	-23
GO Molecular Functions	GO:0005198	structural molecule activity	-24	COL5A2|HSPB2|RPSA|MYL6|NDUFA7|RPL5|RPL7|RPL9|RPL10|RPL11|RPL12|RPL13|RPL17|RPL18|RPL18A|RPL21|RPL22|RPL23A|MRPL23|RPL24|RPL26|RPL27|RPL30|RPL27A|RPL29|RPL31|RPL32|RPL34|RPL35A|RPL37|RPL37A|RPL38|RPL39|RPL36A|RPLP2|RPS2|RPS3|RPS3A|RPS5|RPS7|RPS8|RPS9|RPS10|RPS12|RPS13|RPS14|RPS15|RPS16|RPS17|RPS18|RPS19|RPS20|RPS21|RPS23|RPS24|RPS25|RPS27|RPS27A|RPS28|RPS29|UBA52|SORBS2|RPL23|MRPL33|MRPL19|MRPL3|R…	-22
GO Molecular Functions	GO:0015453	oxidoreduction-driven active transmembrane transporter activity	-24	COX5B|COX6B1|COX7A1|COX7B|COX15|COX3|NDUFA1|NDUFA2|NDUFA3|NDUFA4|NDUFA6|NDUFA7|NDUFA8|NDUFA9|NDUFB1|NDUFB2|NDUFB4|NDUFB5|NDUFB8|NDUFB9|NDUFB10|NDUFC2|NDUFS4|NDUFS5|NDUFS6|SURF1|UQCRFS1|UQCRH|COX7A2L|COX5A|UQCR10|NDUFA12|NDUFS7	-21
GO Molecular Functions	GO:0008137	NADH dehydrogenase (ubiquinone) activity	-16	NDUFA1|NDUFA2|NDUFA3|NDUFA4|NDUFA6|NDUFA7|NDUFA8|NDUFA9|NDUFB1|NDUFB2|NDUFB4|NDUFB5|NDUFB8|NDUFB9|NDUFB10|NDUFC2|NDUFS4|NDUFS5|NDUFS6|NDUFA12|NDUFS7	-14
GO Molecular Functions	GO:0050136	NADH dehydrogenase (quinone) activity	-16	NDUFA1|NDUFA2|NDUFA3|NDUFA4|NDUFA6|NDUFA7|NDUFA8|NDUFA9|NDUFB1|NDUFB2|NDUFB4|NDUFB5|NDUFB8|NDUFB9|NDUFB10|NDUFC2|NDUFS4|NDUFS5|NDUFS6|NDUFA12|NDUFS7	-13
GO Molecular Functions	GO:0003954	NADH dehydrogenase activity	-15	NDUFA1|NDUFA2|NDUFA3|NDUFA4|NDUFA6|NDUFA7|NDUFA8|NDUFA9|NDUFB1|NDUFB2|NDUFB4|NDUFB5|NDUFB8|NDUFB9|NDUFB10|NDUFC2|NDUFS4|NDUFS5|NDUFS6|NDUFA12|NDUFS7	-13
GO Molecular Functions	GO:0003955	NAD(P)H dehydrogenase (quinone) activity	-15	NDUFA1|NDUFA2|NDUFA3|NDUFA4|NDUFA6|NDUFA7|NDUFA8|NDUFA9|NDUFB1|NDUFB2|NDUFB4|NDUFB5|NDUFB8|NDUFB9|NDUFB10|NDUFC2|NDUFS4|NDUFS5|NDUFS6|NDUFA12|NDUFS7	-12
GO Molecular Functions	GO:0015399	primary active transmembrane transporter activity	-15	ATP2B2|COX5B|COX6B1|COX7A1|COX7B|COX15|COX3|NDUFA1|NDUFA2|NDUFA3|NDUFA4|NDUFA6|NDUFA7|NDUFA8|NDUFA9|NDUFB1|NDUFB2|NDUFB4|NDUFB5|NDUFB8|NDUFB9|NDUFB10|NDUFC2|NDUFS4|NDUFS5|NDUFS6|SURF1|UQCRFS1|UQCRH|COX7A2L|ATP6V1F|COX5A|ABCA7|UQCR10|ATP6V1H|NDUFA12|ABCC11|ABCC10|NDUFS7	-12
GO Molecular Functions	GO:0016655	oxidoreductase activity, acting on NAD(P)H, quinone or similar compound as acceptor	-14	NDUFA1|NDUFA2|NDUFA3|NDUFA4|NDUFA6|NDUFA7|NDUFA8|NDUFA9|NDUFB1|NDUFB2|NDUFB4|NDUFB5|NDUFB8|NDUFB9|NDUFB10|NDUFC2|NDUFS4|NDUFS5|NDUFS6|DCXR|NDUFA12|NDUFS7	-12
GO Molecular Functions	GO:0016491	oxidoreductase activity	-13	ADH5|ALDH2|COX5B|COX6B1|COX7A1|COX7A2P2|COX7B|COX15|CYP51A1|ETFA|ETFB|FDX1|FMO4|FMO5|HBB|HSD17B2|LDHB|MGST1|MGST2|MGST3|COX3|NDUFA1|NDUFA2|NDUFA3|NDUFA4|NDUFA6|NDUFA7|NDUFA8|NDUFA9|NDUFB1|NDUFB2|NDUFB4|NDUFB5|NDUFB8|NDUFB9|NDUFB10|NDUFC2|NDUFS4|NDUFS5|NDUFS6|PHYH|SDHD|SPR|SURF1|TXN|UQCRFS1|UQCRH|HSD17B8|DDO|AKR7A2|RDH16|SELENBP1|COX7A2L|COX5A|SELENOF|GSTO1|PRDX6|AKR1A1|PRDX4|PARK7|ETHE1|PRDX5|DEC…	-11
GO Molecular Functions	GO:0016651	oxidoreductase activity, acting on NAD(P)H	-12	COX15|FMO5|NDUFA1|NDUFA2|NDUFA3|NDUFA4|NDUFA6|NDUFA7|NDUFA8|NDUFA9|NDUFB1|NDUFB2|NDUFB4|NDUFB5|NDUFB8|NDUFB9|NDUFB10|NDUFC2|NDUFS4|NDUFS5|NDUFS6|DCXR|NDUFA12|NDUFS7	-9.2
GO Molecular Functions	GO:0019843	rRNA binding	-11	CIRBP|RPL5|RPL9|RPL11|RPL12|RPL23A|RPL37|RPS3|RPS5|RPS9|RPS13|RPS14|RPS18|TST|RPL23|MRPL18|MRPS18C|MRPL20|MRPS11|MRPS6|MRPL11	-8.4
GO Molecular Functions	GO:0015078	proton transmembrane transporter activity	-11	ATP5F1A|ATP5F1D|ATP5F1E|ATP5MC1|ATP5MC2|ATP5MC3|ATP5ME|ATP5PF|ATP5PO|COX5B|COX6B1|COX7A1|COX7B|COX15|COX3|SLC25A3|SURF1|UQCRFS1|UQCRH|COX7A2L|ATP6V1F|COX5A|ATP5MF|ATP5PD|ATP5MG|UQCR10|ATP6V1H|SLC39A8	-8.3
GO Molecular Functions	GO:1990948	ubiquitin ligase inhibitor activity	-7.6	RPL5|RPL11|RPL37|RPS7|RPS15|RPS20|RPL23	-5.3
GO Molecular Functions	GO:0046933	proton-transporting ATP synthase activity, rotational mechanism	-7.3	ATP5F1A|ATP5F1D|ATP5F1E|ATP5ME|ATP5PF|ATP5PO|ATP5MF|ATP5PD|ATP5MG	-5.1
GO Molecular Functions	GO:0070181	small ribosomal subunit rRNA binding	-7	CIRBP|RPS3|RPS13|RPS14|MRPS18C|MRPS11|MRPS6	-4.7
GO Molecular Functions	GO:0055105	ubiquitin-protein transferase inhibitor activity	-7	RPL5|RPL11|RPL37|RPS7|RPS15|RPS20|RPL23	-4.7
GO Molecular Functions	GO:0004129	cytochrome-c oxidase activity	-6.7	COX5B|COX6B1|COX7A1|COX7B|COX15|COX3|SURF1|COX7A2L|COX5A	-4.5
GO Molecular Functions	GO:0016675	oxidoreductase activity, acting on a heme group of donors	-6.4	COX5B|COX6B1|COX7A1|COX7B|COX15|COX3|SURF1|COX7A2L|COX5A	-4.2
GO Molecular Functions	GO:0015252	proton channel activity	-5.9	ATP5F1A|ATP5F1D|ATP5F1E|ATP5ME|ATP5PF|ATP5PO|ATP5MF|ATP5PD|ATP5MG	-3.7
GO Molecular Functions	GO:0022804	active transmembrane transporter activity	-5.3	ATP2B2|COX5B|COX6B1|COX7A1|COX7B|COX15|COX3|NDUFA1|NDUFA2|NDUFA3|NDUFA4|NDUFA6|NDUFA7|NDUFA8|NDUFA9|NDUFB1|NDUFB2|NDUFB4|NDUFB5|NDUFB8|NDUFB9|NDUFB10|NDUFC2|NDUFS4|NDUFS5|NDUFS6|SLC25A3|SLC22A5|SURF1|UQCRFS1|UQCRH|COX7A2L|ATP6V1F|COX5A|SLC12A6|ABCA7|UQCR10|ATP6V1H|NDUFA12|SLC39A8|ABCC11|ABCC10|MFSD12|NDUFS7	-3.1
GO Molecular Functions	GO:0051920	peroxiredoxin activity	-4.8	SELENOF|PRDX6|PRDX4|PARK7|PRDX5	-2.6
GO Molecular Functions	GO:0016684	oxidoreductase activity, acting on peroxide as acceptor	-4.2	HBB|MGST1|MGST2|MGST3|SELENOF|PRDX6|PRDX4|PARK7|PRDX5|TXNDC17	-2.1
GO Molecular Functions	GO:0016209	antioxidant activity	-4.1	HBB|MGST1|MGST2|MGST3|TXN|SELENOF|GSTO1|PRDX6|PRDX4|PARK7|PRDX5|PRXL2A|TXNDC17	-2
GO Molecular Functions	GO:0051537	2 iron, 2 sulfur cluster binding	-4	FDX1|UQCRFS1|GLRX2|GLRX5|CISD1|FDX2|RFESD	-1.9
GO Molecular Functions	GO:0004601	peroxidase activity	-3.9	HBB|MGST1|MGST2|MGST3|SELENOF|PRDX6|PRDX4|PRDX5|TXNDC17	-1.8
GO Molecular Functions	GO:0055106	ubiquitin-protein transferase regulator activity	-3.9	RPL5|RPL11|RPL37|RPS7|RPS15|RPS20|RPL23	-1.8
GO Molecular Functions	GO:0031386	protein tag	-3.8	NEDD8|RPS27A|UBA52|UBC|SUMO1	-1.7
GO Molecular Functions	GO:0048027	mRNA 5'-UTR binding	-3.7	RPL5|RPL26|RPS3A|RPS7|RPS13|RPS14|MRPS11	-1.6
GO Molecular Functions	GO:0008379	thioredoxin peroxidase activity	-3.7	SELENOF|PRDX6|PRDX4|PRDX5	-1.6
GO Molecular Functions	GO:0070003	threonine-type peptidase activity	-3.6	GGT1|PSMB3|PSMB4|PSMB5|PSMB6|PSMB7	-1.5
GO Molecular Functions	GO:0016846	carbon-sulfur lyase activity	-3.5	KYAT1|MGST2|MGST3|SCLY|KYAT3	-1.4
GO Molecular Functions	GO:0004298	threonine-type endopeptidase activity	-3.5	PSMB3|PSMB4|PSMB5|PSMB6|PSMB7	-1.4
GO Molecular Functions	GO:0097371	MDM2/MDM4 family protein binding	-2.8	RPL37|RPS15|RPS20|CDK5RAP3	-0.83
GO Molecular Functions	GO:0004364	glutathione transferase activity	-2.8	GSTA4|GSTM3|MGST1|MGST2|GSTO1	-0.8
GO Molecular Functions	GO:0033764	steroid dehydrogenase activity, acting on the CH-OH group of donors, NAD or NADP as acceptor	-2.8	HSD17B2|HSD17B8|RDH16|NSDHL|SDR42E1	-0.8
GO Molecular Functions	GO:0016765	transferase activity, transferring alkyl or aryl (other than methyl) groups	-2.7	FDFT1|GSTA4|GSTM3|MGST1|MGST2|GSTO1|PDSS1|COQ2|MMAB	-0.75
GO Molecular Functions	GO:0051536	iron-sulfur cluster binding	-2.7	FDX1|POLE|RPS3|UQCRFS1|GLRX2|GLRX5|CISD1|FDX2|RFESD|NDUFS7	-0.69
GO Molecular Functions	GO:0051540	metal cluster binding	-2.7	FDX1|POLE|RPS3|UQCRFS1|GLRX2|GLRX5|CISD1|FDX2|RFESD|NDUFS7	-0.69
GO Molecular Functions	GO:0016531	copper chaperone activity	-2.7	ATOX1|COX17|PARK7	-0.69
GO Molecular Functions	GO:0070180	large ribosomal subunit rRNA binding	-2.7	RPL12|RPL23|MRPL11	-0.69
GO Molecular Functions	GO:0008097	5S rRNA binding	-2.6	RPL5|RPL11|TST|MRPL18	-0.67
GO Molecular Functions	GO:0016614	oxidoreductase activity, acting on CH-OH group of donors	-2.5	ADH5|HSD17B2|LDHB|SPR|HSD17B8|AKR7A2|RDH16|AKR1A1|NSDHL|DCXR|BDH2|VKORC1|SDR42E1|D2HGDH	-0.55
GO Molecular Functions	GO:0016229	steroid dehydrogenase activity	-2.4	HSD17B2|HSD17B8|RDH16|NSDHL|SDR42E1	-0.46
GO Molecular Functions	GO:0019784	deNEDDylase activity	-2.4	UCHL3|COPS5|COPS4	-0.45
GO Molecular Functions	GO:0008121	ubiquinol-cytochrome-c reductase activity	-2.4	UQCRFS1|UQCRH|UQCR10	-0.45
GO Molecular Functions	GO:0016829	lyase activity	-2.2	ADSL|ALAD|CA11|KYAT1|MGST2|MGST3|PTS|RPS3|RNASET2|FTCD|PARK7|DERA|HACD3|SCLY|KYAT3|PPCDC|NEIL1|PCBD2|CLYBL	-0.27
GO Molecular Functions	GO:0016616	oxidoreductase activity, acting on the CH-OH group of donors, NAD or NADP as acceptor	-2	ADH5|HSD17B2|LDHB|SPR|HSD17B8|AKR7A2|RDH16|AKR1A1|NSDHL|DCXR|BDH2|SDR42E1	-0.15
GO Molecular Functions	GO:0003729	mRNA binding	-2	CIRBP|HNRNPA2B1|RPL5|RPL7|RPL24|RPL26|RPS2|RPS3|RPS3A|RPS5|RPS7|RPS13|RPS14|SRSF6|SNRNP70|TAF15|JRK|RBM5|RPL35|PARK7|EXOSC8|TARDBP|SRRM2|MRPL13|MRPS11|HNRNPA3	-0.13
KEGG Pathway	hsa03010	Ribosome	-69	FAU|RPSA|RPL5|RPL7|RPL9|RPL10|RPL11|RPL12|RPL13|RPL17|RPL18|RPL18A|RPL21|RPL22|RPL23A|MRPL23|RPL24|RPL26|RPL27|RPL30|RPL27A|RPL29|RPL31|RPL32|RPL34|RPL35A|RPL37|RPL37A|RPL38|RPL39|RPL36A|RPLP2|RPS2|RPS3|RPS3A|RPS5|RPS7|RPS8|RPS9|RPS10|RPS12|RPS13|RPS14|RPS15|RPS16|RPS17|RPS18|RPS19|RPS20|RPS21|RPS23|RPS24|RPS25|RPS27|RPS27A|RPS28|RPS29|UBA52|RPL23|MRPL33|MRPL19|MRPL3|RPL35|RPL36|MRPL13|MRPL18|MRP…	-67
KEGG Pathway	hsa00190	Oxidative phosphorylation	-33	ATP5F1A|ATP5F1D|ATP5F1E|ATP5MC1|ATP5MC2|ATP5MC3|ATP5ME|ATP5PF|ATP5PO|COX5B|COX6B1|COX6C|COX7A1|COX7B|COX15|COX3|NDUFA1|NDUFA2|NDUFA3|NDUFA4|NDUFA6|NDUFA7|NDUFA8|NDUFA9|NDUFB1|NDUFB2|NDUFB4|NDUFB5|NDUFB8|NDUFB9|NDUFB10|NDUFC2|NDUFS4|NDUFS5|NDUFS6|SDHD|UQCRFS1|UQCRH|COX7A2L|ATP6V1F|COX5A|ATP5MF|COX17|ATP5PD|ATP5MG|UQCRQ|UQCR10|NDUFA13|ATP6V1H|CYCS|NDUFB11|NDUFA12|NDUFS7	-31
KEGG Pathway	hsa05171	Coronavirus disease - COVID-19	-29	FAU|RPSA|RPL5|RPL7|RPL9|RPL10|RPL11|RPL12|RPL13|RPL17|RPL18|RPL18A|RPL21|RPL22|RPL23A|RPL24|RPL26|RPL27|RPL30|RPL27A|RPL29|RPL31|RPL32|RPL34|RPL35A|RPL37|RPL37A|RPL38|RPL39|RPL36A|RPLP2|RPS2|RPS3|RPS3A|RPS5|RPS7|RPS8|RPS9|RPS10|RPS12|RPS13|RPS14|RPS15|RPS16|RPS17|RPS18|RPS19|RPS20|RPS21|RPS23|RPS24|RPS25|RPS27|RPS27A|RPS28|RPS29|UBA52|RPL23|RPL35|RPL36|RPS27L|RPL22L1	-27
KEGG Pathway	hsa05012	Parkinson disease	-26	ATP5F1A|ATP5F1D|ATP5F1E|ATP5MC1|ATP5MC2|ATP5MC3|ATP5PF|ATP5PO|COX5B|COX6B1|COX6C|COX7A1|COX7B|COX3|NDUFA1|NDUFA2|NDUFA3|NDUFA4|NDUFA6|NDUFA7|NDUFA8|NDUFA9|NDUFB1|NDUFB2|NDUFB4|NDUFB5|NDUFB8|NDUFB9|NDUFB10|NDUFC2|NDUFS4|NDUFS5|NDUFS6|PRKN|PSMA2|PSMA7|PSMB3|PSMB4|PSMB5|PSMB6|PSMB7|PSMC2|PSMC6|PSMD8|RPS27A|SDHD|TXN|UBA52|UBC|UQCRFS1|UQCRH|VDAC2|SEM1|COX7A2L|COX5A|ATP5PD|PARK7|UQCRQ|HTRA2|UQCR10|NDUF…	-24
KEGG Pathway	hsa04714	Thermogenesis	-24	ATP5F1A|ATP5F1D|ATP5F1E|ATP5MC1|ATP5MC2|ATP5MC3|ATP5ME|ATP5PF|ATP5PO|COX5B|COX6B1|COX6C|COX7A1|COX7B|COX15|COX3|NDUFA1|NDUFA2|NDUFA3|NDUFA4|NDUFA6|NDUFA7|NDUFA8|NDUFA9|NDUFB1|NDUFB2|NDUFB4|NDUFB5|NDUFB8|NDUFB9|NDUFB10|NDUFC2|NDUFS4|NDUFS5|NDUFS6|SDHD|UQCRFS1|UQCRH|COX7A2L|COX5A|ATP5MF|COX17|ATP5PD|ATP5MG|UQCRQ|UQCR10|NDUFA13|COX16|NDUFB11|NDUFA12|NDUFAF5|COX14|NDUFAF2|COX20|NDUFAF6|NDUFAF8|NDUFS7…	-22
KEGG Pathway	hsa05208	Chemical carcinogenesis - reactive oxygen species	-21	ACP1|ATP5F1A|ATP5F1D|ATP5F1E|ATP5MC1|ATP5MC2|ATP5MC3|ATP5PF|ATP5PO|COX5B|COX6B1|COX6C|COX7A1|COX7B|GSTA4|GSTM3|MGST1|MGST2|MGST3|COX3|NDUFA1|NDUFA2|NDUFA3|NDUFA4|NDUFA6|NDUFA7|NDUFA8|NDUFA9|NDUFB1|NDUFB2|NDUFB4|NDUFB5|NDUFB8|NDUFB9|NDUFB10|NDUFC2|NDUFS4|NDUFS5|NDUFS6|SDHD|UQCRFS1|UQCRH|VDAC2|COX7A2L|COX5A|GSTO1|AKR1A1|ATP5PD|UQCRQ|UQCR10|NDUFA13|NDUFB11|NDUFA12|NDUFS7	-20
KEGG Pathway	hsa05016	Huntington disease	-21	ATP5F1A|ATP5F1D|ATP5F1E|ATP5MC1|ATP5MC2|ATP5MC3|ATP5PF|ATP5PO|AP2S1|COX5B|COX6B1|COX6C|COX7A1|COX7B|COX3|NDUFA1|NDUFA2|NDUFA3|NDUFA4|NDUFA6|NDUFA7|NDUFA8|NDUFA9|NDUFB1|NDUFB2|NDUFB4|NDUFB5|NDUFB8|NDUFB9|NDUFB10|NDUFC2|NDUFS4|NDUFS5|NDUFS6|POLR2F|POLR2G|POLR2I|PSMA2|PSMA7|PSMB3|PSMB4|PSMB5|PSMB6|PSMB7|PSMC2|PSMC6|PSMD8|SDHD|UQCRFS1|UQCRH|VDAC2|SEM1|COX7A2L|COX5A|ATP5PD|DCTN3|UQCRQ|UQCR10|NDUFA13|C…	-19
KEGG Pathway	hsa05014	Amyotrophic lateral sclerosis	-20	ATP5F1A|ATP5F1D|ATP5F1E|ATP5MC1|ATP5MC2|ATP5MC3|ATP5PF|ATP5PO|COX5B|COX6B1|COX6C|COX7A1|COX7B|HNRNPA1|HNRNPA2B1|COX3|NDUFA1|NDUFA2|NDUFA3|NDUFA4|NDUFA6|NDUFA7|NDUFA8|NDUFA9|NDUFB1|NDUFB2|NDUFB4|NDUFB5|NDUFB8|NDUFB9|NDUFB10|NDUFC2|NDUFS4|NDUFS5|NDUFS6|PRKN|MAP2K6|PSMA2|PSMA7|PSMB3|PSMB4|PSMB5|PSMB6|PSMB7|PSMC2|PSMC6|PSMD8|SDHD|UQCRFS1|UQCRH|SEM1|COX7A2L|COX5A|ATP5PD|DCTN3|TARDBP|UQCRQ|UQCR10|NDUFA…	-19
KEGG Pathway	hsa05020	Prion disease	-20	ATP5F1A|ATP5F1D|ATP5F1E|ATP5MC1|ATP5MC2|ATP5MC3|ATP5PF|ATP5PO|COX5B|COX6B1|COX6C|COX7A1|COX7B|COX3|NDUFA1|NDUFA2|NDUFA3|NDUFA4|NDUFA6|NDUFA7|NDUFA8|NDUFA9|NDUFB1|NDUFB2|NDUFB4|NDUFB5|NDUFB8|NDUFB9|NDUFB10|NDUFC2|NDUFS4|NDUFS5|NDUFS6|PSMA2|PSMA7|PSMB3|PSMB4|PSMB5|PSMB6|PSMB7|PSMC2|PSMC6|PSMD8|SDHD|UQCRFS1|UQCRH|VDAC2|SEM1|COX7A2L|COX5A|ATP5PD|UQCRQ|UQCR10|NDUFA13|CYCS|NDUFB11|NDUFA12|NDUFS7	-18
KEGG Pathway	hsa05415	Diabetic cardiomyopathy	-17	ATP5F1A|ATP5F1D|ATP5F1E|ATP5MC1|ATP5MC2|ATP5MC3|ATP5PF|ATP5PO|COX5B|COX6B1|COX6C|COX7A1|COX7B|COX3|NDUFA1|NDUFA2|NDUFA3|NDUFA4|NDUFA6|NDUFA7|NDUFA8|NDUFA9|NDUFB1|NDUFB2|NDUFB4|NDUFB5|NDUFB8|NDUFB9|NDUFB10|NDUFC2|NDUFS4|NDUFS5|NDUFS6|PTPA|SDHD|UQCRFS1|UQCRH|VDAC2|COX7A2L|COX5A|ATP5PD|UQCRQ|UQCR10|NDUFA13|NDUFB11|NDUFA12|NDUFS7	-15
KEGG Pathway	hsa04932	Non-alcoholic fatty liver disease	-16	CEBPA|COX5B|COX6B1|COX6C|COX7A1|COX7B|COX3|NDUFA1|NDUFA2|NDUFA3|NDUFA4|NDUFA6|NDUFA7|NDUFA8|NDUFA9|NDUFB1|NDUFB2|NDUFB4|NDUFB5|NDUFB8|NDUFB9|NDUFB10|NDUFC2|NDUFS4|NDUFS5|NDUFS6|SDHD|UQCRFS1|UQCRH|COX7A2L|COX5A|UQCRQ|UQCR10|NDUFA13|MLXIPL|CYCS|NDUFB11|NDUFA12|NDUFS7	-15
KEGG Pathway	hsa05010	Alzheimer disease	-14	ATP5F1A|ATP5F1D|ATP5F1E|ATP5MC1|ATP5MC2|ATP5MC3|ATP5PF|ATP5PO|COX5B|COX6B1|COX6C|COX7A1|COX7B|COX3|NDUFA1|NDUFA2|NDUFA3|NDUFA4|NDUFA6|NDUFA7|NDUFA8|NDUFA9|NDUFB1|NDUFB2|NDUFB4|NDUFB5|NDUFB8|NDUFB9|NDUFB10|NDUFC2|NDUFS4|NDUFS5|NDUFS6|PSMA2|PSMA7|PSMB3|PSMB4|PSMB5|PSMB6|PSMB7|PSMC2|PSMC6|PSMD8|SDHD|UQCRFS1|UQCRH|VDAC2|SEM1|NAE1|COX7A2L|COX5A|RTN3|ATP5PD|UQCRQ|UQCR10|NDUFA13|CYCS|NDUFB11|NDUFA12|SLC…	-13
KEGG Pathway	hsa05022	Pathways of neurodegeneration - multiple diseases	-14	ATP5F1A|ATP5F1D|ATP5F1E|ATP5MC1|ATP5MC2|ATP5MC3|ATP5PF|ATP5PO|COX5B|COX6B1|COX6C|COX7A1|COX7B|COX3|NDUFA1|NDUFA2|NDUFA3|NDUFA4|NDUFA6|NDUFA7|NDUFA8|NDUFA9|NDUFB1|NDUFB2|NDUFB4|NDUFB5|NDUFB8|NDUFB9|NDUFB10|NDUFC2|NDUFS4|NDUFS5|NDUFS6|PRKN|MAP2K6|PSMA2|PSMA7|PSMB3|PSMB4|PSMB5|PSMB6|PSMB7|PSMC2|PSMC6|PSMD8|RPS27A|SDHD|UBA52|UBC|UQCRFS1|UQCRH|VDAC2|SEM1|COX7A2L|COX5A|ATP5PD|DCTN3|PARK7|TARDBP|UQCRQ|H…	-12
KEGG Pathway	hsa04723	Retrograde endocannabinoid signaling	-5.7	GNG5|NDUFA1|NDUFA2|NDUFA3|NDUFA4|NDUFA6|NDUFA7|NDUFA8|NDUFA9|NDUFB1|NDUFB2|NDUFB4|NDUFB5|NDUFB8|NDUFB9|NDUFB10|NDUFC2|NDUFS4|NDUFS5|NDUFS6|NDUFA13|NDUFB11|NDUFA12|NDUFS7	-4.3
KEGG Pathway	hsa03050	Proteasome	-4.6	PSMA2|PSMA7|PSMB3|PSMB4|PSMB5|PSMB6|PSMB7|PSMC2|PSMC6|PSMD8|SEM1	-3.2
KEGG Pathway	hsa01240	Biosynthesis of cofactors	-4.1	ADSL|ALAD|ALDH2|COX15|NME2|PTS|SPR|UGP2|AKR1A1|QPRT|COQ2|NME7|COQ6|LIPT1|OXSM|NADSYN1|PPCDC|VKORC1|COQ5|MMAB	-2.8
KEGG Pathway	hsa00982	Drug metabolism - cytochrome P450	-4.1	ADH5|FMO4|FMO5|GSTA4|GSTM3|MGST1|MGST2|MGST3|GSTO1	-2.8
KEGG Pathway	hsa00983	Drug metabolism - other enzymes	-4.1	NAT1|TYMP|GSTA4|GSTM3|ITPA|MGST1|MGST2|MGST3|NME2|GSTO1|NME7	-2.8
KEGG Pathway	hsa00980	Metabolism of xenobiotics by cytochrome P450	-3	ADH5|GSTA4|GSTM3|MGST1|MGST2|MGST3|AKR7A2|GSTO1	-1.8
KEGG Pathway	hsa05204	Chemical carcinogenesis - DNA adducts	-2.9	NAT1|GSTA4|GSTM3|MGST1|MGST2|MGST3|GSTO1	-1.6
KEGG Pathway	hsa00130	Ubiquinone and other terpenoid-quinone biosynthesis	-2.6	COQ2|COQ6|VKORC1|COQ5	-1.4
KEGG Pathway	hsa04260	Cardiac muscle contraction	-2.6	COX5B|COX6B1|COX6C|COX7A1|COX7B|COX3|UQCRFS1|UQCRH|COX7A2L|COX5A|UQCRQ|UQCR10	-1.4
KEGG Pathway	hsa00480	Glutathione metabolism	-2.5	GGT1|GSTA4|GSTM3|MGST1|MGST2|MGST3|GSTO1|PRDX6	-1.3
KEGG Pathway	hsa00100	Steroid biosynthesis	-2.4	CYP51A1|FDFT1|LSS|EBP|NSDHL	-1.2
KEGG Pathway	hsa03060	Protein export	-2	SPCS2|SEC61B|SEC61G|SPCS3|IMMP1L	-0.87
KEGG Pathway	hsa03040	Spliceosome	-2	HNRNPA1|SRSF6|SNRNP70|SNRPA1|SNRPD2|SNRPF|SNRPG|BCAS2|LSM3|TRA2A|LSM7|MAGOHB|CCDC12|HNRNPA3	-0.87

## Sheet: liver-male-biased-gene-658
Category	GO	Description	LogP	Hits	Log(q-value)
GO Biological Processes	GO:0007167	enzyme-linked receptor protein signaling pathway	-12	ABL1|ACVR1B|AKT2|APC|CBL|CDH5|CRKL|CSF1R|EGFR|EGR1|EREG|FGR|FOXO1|GSK3B|IGF1|IGFBP1|IL6ST|IL13RA1|INSR|JAK1|JAK2|JUN|LOX|LRP1|SMAD1|MYO1C|NEDD9|PML|PTPN1|PTPRF|PTPRJ|SKI|SPTBN1|STAT3|TGFA|TGFBR2|TGFBR3|TYK2|ZFAND5|ZYX|IRS2|IQGAP1|SGPL1|MAPKAPK2|RAPGEF2|MTSS1|GAB2|MVP|SH2B3|FST|SORBS1|PLCB1|SLC39A14|GIT1|HIPK2|PLCE1|DDIT4|KIF16B|SULF2|ZMIZ1|TGIF2|GAREM1|SVEP1	-7.2
GO Biological Processes	GO:0031331	positive regulation of cellular catabolic process	-9.8	AKT2|ZFP36L1|DAB2|DAPK1|FOXO1|FOXO3|GSK3B|HTT|HIF1A|HMOX1|IGF1|INSR|LRP1|MSN|NFE2L2|PAFAH1B2|PRKCD|PTPN1|TNFRSF1B|ZFP36|BTG2|AXIN1|IRS2|PUM1|TOB1|TRIB1|ARIH2|CNOT1|ZSWIM8|TNRC6B|ATG2A|PABPC1|AGO2|WAC|RC3H2|SAMD4B|DCP1A|PNPLA2|TNRC6C|TP53INP2|SESN2|TMEM259|RNF19B|SESN3|RC3H1|SH3D19|PATL1|YTHDF3|MEX3D|PLIN5	-6.1
GO Biological Processes	GO:0009896	positive regulation of catabolic process	-9.5	AKT2|APC|ZFP36L1|DAB2|DAPK1|FOXO1|FOXO3|GSK3B|HTT|HIF1A|HMOX1|IGF1|INSR|LRP1|MSN|NFE2L2|PAFAH1B2|PRKCD|PTPN1|TNFRSF1B|ZFP36|BTG2|RAB7A|AXIN1|IRS2|PUM1|HUWE1|TOB1|TRIB1|ARIH2|WWP1|CNOT1|ZSWIM8|TNRC6B|ATG2A|PABPC1|AGO2|WAC|RC3H2|SAMD4B|DCP1A|PNPLA2|TNRC6C|TP53INP2|SESN2|TMEM259|RNF19B|SESN3|RC3H1|SH3D19|PATL1|YTHDF3|MEX3D|PLIN5	-5.9
GO Biological Processes	GO:0030097	hemopoiesis	-9.2	ABL1|ADAR|ATP6AP1|ATP7A|BCR|ZFP36L1|KLF6|CSF1R|EEF2|EGR1|EP300|EPAS1|HIF1A|RBPJ|JAK1|JAK2|JUN|LBR|LEPR|MITF|MYH9|NOTCH2|PML|PTPRJ|RELB|RORA|ST3GAL1|SRF|STAT3|TGFBR2|TGFBR3|VCAM1|SGPL1|KLF4|HDAC4|GAB2|WDR1|PTBP3|SH2B3|WASF2|ARIH2|FST|UBD|SBNO2|NCOA6|SIN3A|FLVCR1|HIPK2|TMOD3|RC3H2|LRRC8A|PREX1|RC3H1|NFAM1|HIPK1|CCR2	-5.7
GO Biological Processes	GO:0001944	vasculature development	-8.9	ACTG1|APOD|RHOB|ATP7A|ZFP36L1|CDH5|CRKL|DAG1|EGR1|EGR2|EPAS1|EREG|FOXO1|HIF1A|HMOX1|NR4A1|RBPJ|JUN|LEPR|LOX|LRP1|MYH9|NF1|NOS3|NOTCH2|PKD1|PROX1|RORA|SHB|SRF|TGFA|TGFBR2|TGFBR3|TNFAIP2|WNT2|YWHAZ|ZFAND5|SGPL1|SOCS3|RAPGEF2|WASF2|PAXIP1|CEMIP2|ANKRD17|FLVCR1|ANGPTL4|ERRFI1|C1GALT1|ADAMTS9|ZMIZ1|SVEP1|PANK2|ARID2	-5.6
GO Biological Processes	GO:0048534	hematopoietic or lymphoid organ development	-8.9	ABL1|ADAR|ATP6AP1|ATP7A|BCR|ZFP36L1|KLF6|CRKL|CSF1R|EEF2|EGR1|EP300|EPAS1|HIF1A|RBPJ|JAK1|JAK2|JUN|LBR|LEPR|MITF|MYH9|NFKB2|NOTCH2|PML|PTPRJ|RELB|RORA|ST3GAL1|SRF|STAT3|TGFBR2|TGFBR3|VCAM1|SGPL1|KLF4|HDAC4|GAB2|WDR1|PTBP3|SH2B3|WASF2|ARIH2|FST|UBD|SBNO2|NCOA6|SIN3A|FLVCR1|HIPK2|TMOD3|RC3H2|LRRC8A|PREX1|RC3H1|NFAM1|HIPK1|CCR2	-5.6
GO Biological Processes	GO:0007169	transmembrane receptor protein tyrosine kinase signaling pathway	-8.4	ABL1|AKT2|APC|CBL|CRKL|CSF1R|EGFR|EREG|FGR|FOXO1|GSK3B|IGF1|IGFBP1|INSR|JAK1|JAK2|LOX|MYO1C|NEDD9|PTPN1|PTPRJ|STAT3|TGFA|TYK2|ZFAND5|IRS2|IQGAP1|SGPL1|MAPKAPK2|RAPGEF2|MTSS1|GAB2|MVP|SH2B3|SORBS1|PLCB1|SLC39A14|GIT1|PLCE1|DDIT4|KIF16B|SULF2|GAREM1|SVEP1	-5.2
GO Biological Processes	GO:0002520	immune system development	-8.3	ABL1|ADAR|ATP6AP1|ATP7A|BCR|ZFP36L1|KLF6|CRKL|CSF1R|EEF2|EGR1|EP300|EPAS1|HIF1A|RBPJ|JAK1|JAK2|JUN|LBR|LEPR|MITF|MYH9|NFKB2|NOTCH2|PML|PTPRJ|RELB|RORA|ST3GAL1|SRF|STAT3|TGFBR2|TGFBR3|VCAM1|SGPL1|KLF4|HDAC4|GAB2|WDR1|PTBP3|SH2B3|WASF2|ARIH2|FST|UBD|SBNO2|NCOA6|SAMHD1|SIN3A|FLVCR1|HIPK2|TMOD3|RC3H2|LRRC8A|PREX1|RC3H1|NFAM1|HIPK1|CCR2	-5.1
GO Biological Processes	GO:0001568	blood vessel development	-8.1	ACTG1|APOD|RHOB|ATP7A|ZFP36L1|CDH5|CRKL|DAG1|EGR1|EGR2|EPAS1|EREG|FOXO1|HIF1A|HMOX1|NR4A1|RBPJ|JUN|LEPR|LOX|LRP1|MYH9|NF1|NOS3|NOTCH2|PKD1|PROX1|RORA|SHB|SRF|TGFA|TGFBR2|TGFBR3|TNFAIP2|WNT2|YWHAZ|SGPL1|SOCS3|RAPGEF2|WASF2|PAXIP1|CEMIP2|ANKRD17|FLVCR1|ANGPTL4|C1GALT1|ADAMTS9|ZMIZ1|PANK2|ARID2	-5
GO Biological Processes	GO:0071345	cellular response to cytokine stimulus	-7.8	ACTG1|ACTN4|ZFP36L1|CAPN2|CBL|CRKL|CSF1R|CSF2RA|CSF3R|DAPK1|DUSP1|EGR1|EIF5A|EREG|FOXO3|NR5A2|CXCL2|GSK3B|HIF1A|IFNAR1|IL1R1|IL6ST|IL13RA1|JAK1|JAK2|LEPR|LOX|MAP3K5|MT2A|MYO1C|NFE2L2|NFKBIA|PML|PTPRJ|RORA|STAT3|TNFRSF1A|TNFRSF1B|TPR|TYK2|VCAM1|ZFP36|ZYX|SMARCA5|OASL|SOCS3|KLF4|SH2B3|SBNO2|PLCB1|WNK1|SPRY4|RC3H1|CCR2	-4.7
GO Biological Processes	GO:0060213	positive regulation of nuclear-transcribed mRNA poly(A) tail shortening	-7.6	ZFP36|BTG2|TOB1|CNOT1|TNRC6B|PABPC1|AGO2|TNRC6C	-4.6
GO Biological Processes	GO:1900153	positive regulation of nuclear-transcribed mRNA catabolic process, deadenylation-dependent decay	-7.6	ZFP36L1|ZFP36|TOB1|CNOT1|TNRC6B|PABPC1|AGO2|TNRC6C	-4.6
GO Biological Processes	GO:0043409	negative regulation of MAPK cascade	-7.3	ABL1|ATF3|CYLD|DAB2|DAG1|DUSP1|DUSP5|DUSP6|DUSP8|FOXO1|NF1|PER1|PRKCD|PTPN1|PTPRJ|SH2B3|HIPK3|TNIP1|NUP62|ERRFI1|ASH1L|SEMA6A|DUSP16|SPRY4	-4.3
GO Biological Processes	GO:0009725	response to hormone	-7	AKT2|APC|ATP2B1|ZFP36L1|CYBB|DAB2|DAG1|EGR1|EGR2|EP300|EREG|FOXO1|FOXO3|NR5A2|GOT1|GSK3B|HMGCS2|HMOX1|NR4A1|IGFBP1|IL1RN|INSR|JAK1|JAK2|LEPR|LOX|MAP1B|MBP|NFE2L2|NOS3|POR|PPARD|PRKCD|PTPN1|SDC1|SP1|SRF|STAT3|TGFBR2|TGFBR3|THRB|TYK2|ZFP36|BTG2|NCOA4|ARID1A|IRS2|NCOA2|SORBS1|NCOA6|PLCB1|SLC39A14|KBTBD2|ERRFI1|DDIT4|ZMIZ1|CALCOCO1|LPIN3|SESN2|SESN3|PAQR7	-4
GO Biological Processes	GO:0045859	regulation of protein kinase activity	-7	ABL1|ACTB|ADAR|APC|CBL|CDKN1A|CSF1R|DAB2|DAG1|DUSP1|DVL3|EGFR|EGR1|EREG|FGR|HTT|IGF1|INSR|JAK2|LTF|MAP3K5|NEDD9|NF1|PKD1|PRKAR1A|PRKCD|PROX1|PTPN1|PTPRJ|SDC4|TGFA|TGFBR2|AXIN1|IQGAP1|TRAF4|RAPGEF2|DAZAP2|MVP|SH2B3|HIPK3|TRIB1|AKAP13|TAB2|NUP62|PLCE1|PRKAG3|ERRFI1|TAOK1|WNK1|DUSP16|ZFP91|SPRY4|SESN2|MOB3A|CCNYL1	-4
GO Biological Processes	GO:0060211	regulation of nuclear-transcribed mRNA poly(A) tail shortening	-6.9	ZFP36|BTG2|TOB1|CNOT1|TNRC6B|PABPC1|AGO2|TNRC6C	-4
GO Biological Processes	GO:0030155	regulation of cell adhesion	-6.9	ABL1|ACTB|ACTG1|ACTN4|ANK3|APOD|ZFHX3|CRKL|DAB2|DAG1|DUSP1|FOXO3|FLOT2|GSK3B|IGF1|IL1RN|IL6ST|JAK1|JAK2|LAMC1|MBP|NEDD9|NF1|PKD1|PML|PRKAR1A|PRKCD|PTPRJ|RREB1|SDC4|SLC7A1|SRF|TGFBR2|TJP1|TYK2|VCAM1|VCL|ARID1A|KLF4|MAP4K4|SH2B3|TRIOBP|CLASP1|PLXNB2|PTPN23|RC3H2|PELI1|ZMIZ1|ARID1B|SEMA6A|PREX1|WNK1|PEAK1|SPRY4|PLXNA4|C2CD4A|RC3H1|ARID2|ACER2|CCR2	-4
GO Biological Processes	GO:0061014	positive regulation of mRNA catabolic process	-6.8	ZFP36L1|ZFP36|BTG2|PUM1|TOB1|CNOT1|TNRC6B|PABPC1|AGO2|RC3H2|SAMD4B|DCP1A|TNRC6C|RC3H1|PATL1|YTHDF3|MEX3D	-3.9
GO Biological Processes	GO:0030099	myeloid cell differentiation	-6.7	ADAR|ATP6AP1|CSF1R|EP300|EPAS1|RBPJ|JAK2|JUN|LBR|MITF|MYH9|NOTCH2|PML|RELB|SRF|TGFBR2|TGFBR3|GAB2|WDR1|PTBP3|SH2B3|WASF2|UBD|SBNO2|NCOA6|FLVCR1|HIPK2|TMOD3	-3.8
GO Biological Processes	GO:0043549	regulation of kinase activity	-6.5	ABL1|ACTB|ADAR|APC|CBL|CDKN1A|CSF1R|DAB2|DAG1|DUSP1|DVL3|EGFR|EGR1|EREG|FGR|HTT|IGF1|INSR|JAK2|LTF|MAP3K5|NEDD9|NF1|PKD1|PRKAR1A|PRKCD|PROX1|PTPN1|PTPRJ|RANBP2|SDC4|TGFA|TGFBR2|AXIN1|IRS2|IQGAP1|SOCS3|TRAF4|RAPGEF2|DAZAP2|MVP|SH2B3|HIPK3|TRIB1|AKAP13|ATG14|TAB2|NUP62|SOCS7|PLCE1|PRKAG3|ERRFI1|TAOK1|WNK1|DUSP16|ZFP91|SPRY4|SESN2|MIDN|MOB3A|CCNYL1	-3.7
GO Biological Processes	GO:1900151	regulation of nuclear-transcribed mRNA catabolic process, deadenylation-dependent decay	-6.5	ZFP36L1|ZFP36|TOB1|CNOT1|TNRC6B|PABPC1|AGO2|TNRC6C|RC3H1	-3.6
GO Biological Processes	GO:0043408	regulation of MAPK cascade	-6.4	ABL1|ATF3|CRKL|CSF1R|CYLD|DAB2|DAG1|DUSP1|DUSP5|DUSP6|DUSP8|DVL3|EGFR|FOXO1|IGF1|INSR|JAK2|JUN|MAP3K5|NF1|NOTCH2|PER1|PRKCD|PTPN1|PTPRJ|TGFA|YWHAZ|AXIN1|IQGAP1|MAP4K4|TRAF4|RAPGEF2|SH2B3|HIPK3|TNIP1|GADD45G|AKAP13|PLCB1|PHLPP1|NUP62|HIPK2|PLCE1|ERRFI1|ASH1L|DHX33|TAOK1|SEMA6A|JCAD|GAREM1|DUSP16|SPRY4|STK40|RELL1	-3.6
GO Biological Processes	GO:0043434	response to peptide hormone	-6.4	AKT2|APC|ZFP36L1|CYBB|DAG1|EGR1|EGR2|EREG|FOXO1|GOT1|GSK3B|HMGCS2|NR4A1|IGFBP1|INSR|JAK1|JAK2|MAP1B|NFE2L2|POR|PRKCD|PTPN1|SP1|STAT3|TGFBR3|TYK2|BTG2|IRS2|SORBS1|PLCB1|SLC39A14|KBTBD2|ERRFI1|LPIN3|SESN2|SESN3	-3.6
GO Biological Processes	GO:1901652	response to peptide	-6.3	AKT2|APC|ZFP36L1|CYBB|DAG1|EGR1|EGR2|EREG|FOXO1|FOXO3|GOT1|GSK3B|HMGCS2|NR4A1|IGF1|IGFBP1|INSR|JAK1|JAK2|LRP1|MAP1B|NFE2L2|NFKBIA|POR|PRKCD|PTPN1|SP1|STAT3|TGFBR3|TYK2|VCAM1|BTG2|IRS2|SORBS1|PLCB1|SLC39A14|KBTBD2|ERRFI1|LPIN3|SESN2|SESN3	-3.5
GO Biological Processes	GO:0070848	response to growth factor	-6.3	ABL1|ACVR1B|ZFHX3|ATP7A|ZFP36L1|CBL|CDH5|CRKL|DAB2|DUSP6|EGFR|EGR1|FOXO3|NR4A1|INSR|JUN|SMAD1|MAP1B|MYO1C|PML|SKI|STAT3|TGFBR2|TGFBR3|TNFRSF1B|TPR|VCAM1|WNT2|ZFP36|ZYX|IQGAP1|ZPR1|MAPKAPK2|KLF4|RAPGEF2|FST|HIPK2|ERRFI1|DDIT4|SOX6|KIF16B|ZMIZ1|SEMA6A|GAREM1	-3.5
GO Biological Processes	GO:0070482	response to oxygen levels	-6.2	ACTN4|ATP6AP1|ATP7A|ZFP36L1|CAPN2|CBL|CREBBP|CYBB|EGR1|EP300|EPAS1|FOXO1|FOXO3|HIF1A|HMOX1|RBPJ|ITPR2|ND4|NF1|NFE2L2|PML|PPARD|RORA|SRF|TGFBR2|TGFBR3|VCAM1|LIMD1|HIPK2|ANGPTL4|DDIT4|CPEB4|EGLN3	-3.4
GO Biological Processes	GO:0036293	response to decreased oxygen levels	-6.1	ACTN4|ATP7A|ZFP36L1|CAPN2|CBL|CREBBP|CYBB|EGR1|EP300|EPAS1|FOXO3|HIF1A|HMOX1|RBPJ|ITPR2|ND4|NF1|NFE2L2|PML|PPARD|RORA|SRF|TGFBR2|TGFBR3|VCAM1|LIMD1|HIPK2|ANGPTL4|DDIT4|CPEB4|EGLN3	-3.3
GO Biological Processes	GO:0071900	regulation of protein serine/threonine kinase activity	-6	ABL1|ACTB|APC|CDKN1A|CSF1R|DAB2|DUSP1|DVL3|EGFR|HTT|INSR|LTF|MAP3K5|NF1|PKD1|PRKAR1A|PRKCD|PROX1|PTPN1|PTPRJ|TGFA|AXIN1|IQGAP1|RAPGEF2|DAZAP2|SH2B3|HIPK3|TRIB1|AKAP13|NUP62|PRKAG3|TAOK1|DUSP16|SPRY4|SESN2|CCNYL1	-3.3
GO Biological Processes	GO:0071417	cellular response to organonitrogen compound	-5.8	ABL1|ACTB|AKT2|APC|ATP7A|ZFP36L1|CAPN2|CHRM2|CYBB|EGFR|EGR1|FOXO1|FOXO3|FOLR2|GOT1|GSK3B|HMGCS2|NR4A1|IGF1|IGFBP1|INSR|ITPR2|JAK1|JAK2|JUN|LRP1|MAP1B|NFE2L2|PDE4B|POR|PRKCD|PTPN1|SP1|STAT3|TYK2|VCAM1|IRS2|RAPGEF2|SORBS1|PLCB1|SLC39A14|SIN3A|ERRFI1|LPIN3|CPEB4|SESN2|SESN3	-3.1
GO Biological Processes	GO:0006954	inflammatory response	-5.8	C4A|ADGRE5|CSF1R|CYBB|F12|FOLR2|CXCL2|HIF1A|HMOX1|RBPJ|IL1R1|IL1RN|JAK2|JUN|LRP1|LY75|SMAD1|NFATC3|NFE2L2|NOTCH2|REL|RELB|SDC1|STAT3|TFR2|TNFRSF1A|TNFRSF1B|VCAM1|SNAP23|MAPKAPK2|CD163|HDAC4|TNIP1|PLD3|NKIRAS2|C2CD4A|NFAM1|CCR2	-3.1
GO Biological Processes	GO:0043620	regulation of DNA-templated transcription in response to stress	-5.8	ATF3|EGR1|EPAS1|HIF1A|HMOX1|RBPJ|JUN|NFE2L2|RPS6KA3|SIN3A|INO80|SESN2	-3.1
GO Biological Processes	GO:1901699	cellular response to nitrogen compound	-5.8	ABL1|ACTB|GRK2|AKT2|APC|ATP7A|ZFP36L1|CAPN2|CHRM2|CRKL|CYBB|EGFR|EGR1|FOXO1|FOXO3|FOLR2|GOT1|GSK3B|HMGCS2|NR4A1|IGF1|IGFBP1|INSR|ITPR2|JAK1|JAK2|JUN|LRP1|MAP1B|MAP3K5|NFE2L2|PDE4B|POR|PRKCD|PTPN1|SP1|STAT3|TYK2|VCAM1|IRS2|RAPGEF2|SORBS1|PLCB1|SLC39A14|SIN3A|ERRFI1|LPIN3|CPEB4|SESN2|SESN3	-3.1
GO Biological Processes	GO:0071363	cellular response to growth factor stimulus	-5.7	ABL1|ACVR1B|ATP7A|ZFP36L1|CBL|CDH5|CRKL|DAB2|EGFR|EGR1|FOXO3|NR4A1|INSR|JUN|SMAD1|MAP1B|MYO1C|PML|SKI|STAT3|TGFBR2|TGFBR3|TNFRSF1B|VCAM1|WNT2|ZFP36|ZYX|IQGAP1|ZPR1|MAPKAPK2|KLF4|RAPGEF2|FST|HIPK2|ERRFI1|DDIT4|SOX6|KIF16B|ZMIZ1|SEMA6A|GAREM1	-3.1
GO Biological Processes	GO:0010675	regulation of cellular carbohydrate metabolic process	-5.7	AKT2|EP300|FOXO1|GSK3B|IGF1|FOXK2|INSR|LEPR|RANBP2|RORA|STAT3|IRS2|HDAC4|NCOA2|SORBS1|GIT1|DDIT4|SESN2|MIDN|SERPINA12	-3.1
GO Biological Processes	GO:0043619	regulation of transcription from RNA polymerase II promoter in response to oxidative stress	-5.7	EPAS1|HIF1A|HMOX1|NFE2L2|SIN3A|SESN2	-3.1
GO Biological Processes	GO:0002521	leukocyte differentiation	-5.6	ABL1|ATP6AP1|ATP7A|ZFP36L1|KLF6|CSF1R|EGR1|EP300|RBPJ|JUN|LBR|LEPR|MITF|MYH9|NOTCH2|PTPRJ|RELB|RORA|ST3GAL1|SRF|STAT3|TGFBR2|VCAM1|HDAC4|GAB2|UBD|SBNO2|RC3H2|LRRC8A|PREX1|RC3H1|NFAM1	-3
GO Biological Processes	GO:1903313	positive regulation of mRNA metabolic process	-5.6	ZFP36L1|NUP98|ZFP36|BTG2|PUM1|TOB1|CNOT1|TNRC6B|PABPC1|AGO2|RC3H2|SAMD4B|DCP1A|TNRC6C|RC3H1|PATL1|YTHDF3|MEX3D	-3
GO Biological Processes	GO:0016570	histone modification	-5.6	ACTB|CHD4|CREBBP|EP300|JAK2|PER1|PHF2|PRKCD|ATXN7|TBL1X|BAP1|SMARCA5|CLOCK|HDAC4|HUWE1|CARM1|SRCAP|PRDM4|PAXIP1|NCOA6|USP22|SIN3A|BRPF3|KMT5B|WAC|KDM3B|GATAD2A|BCOR|YEATS2|ASH1L|GATAD2B|MIER1|KMT2C|SETD7|DOT1L|MIDEAS|TADA2B|BOD1L1	-3
GO Biological Processes	GO:0001666	response to hypoxia	-5.6	ACTN4|ATP7A|ZFP36L1|CAPN2|CREBBP|CYBB|EGR1|EP300|EPAS1|FOXO3|HIF1A|HMOX1|RBPJ|ITPR2|ND4|NF1|NFE2L2|PML|PPARD|RORA|SRF|TGFBR2|TGFBR3|VCAM1|LIMD1|HIPK2|ANGPTL4|DDIT4|EGLN3	-3
GO Biological Processes	GO:0043618	regulation of transcription from RNA polymerase II promoter in response to stress	-5.5	ATF3|EGR1|EPAS1|HIF1A|HMOX1|RBPJ|JUN|NFE2L2|SIN3A|INO80|SESN2	-3
GO Biological Processes	GO:0048146	positive regulation of fibroblast proliferation	-5.5	ABL1|CDKN1A|EGFR|EREG|FOSL2|IGF1|JUN|PML|WNT2|WAPL|ZMIZ1	-3
GO Biological Processes	GO:0006109	regulation of carbohydrate metabolic process	-5.5	AP2A1|AKT2|EP300|FOXO1|GSK3B|HIF1A|IGF1|FOXK2|INSR|LEPR|RANBP2|RORA|STAT3|IRS2|HDAC4|NCOA2|SORBS1|GIT1|DDIT4|SESN2|MIDN|SERPINA12	-3
GO Biological Processes	GO:0019221	cytokine-mediated signaling pathway	-5.5	ACTN4|CBL|CSF1R|CSF2RA|CSF3R|EGR1|EIF5A|EREG|FOXO3|CXCL2|IFNAR1|IL1R1|IL6ST|IL13RA1|JAK1|JAK2|LEPR|NFKBIA|PTPRJ|STAT3|TNFRSF1A|TNFRSF1B|TYK2|OASL|SH2B3|PLCB1|WNK1|CCR2	-3
GO Biological Processes	GO:0060341	regulation of cellular localization	-5.4	ACTB|AKT2|ANK3|APC|APOD|ARHGAP1|ZFP36L1|CRKL|DAB2|DAG1|EGFR|EPB41|FGR|GSK3B|HIF1A|HMOX1|JAK2|LRP1|MAP1A|MAP1B|MSN|MYO1C|NF1|NUMA1|PML|PPARD|PRKCD|PTPN1|SDC1|SDC4|SPTBN1|SREBF2|SUPT6H|TPR|ZFP36|RAB7A|STAM|BAP1|PPFIA1|ZPR1|GAB2|NUP153|HUWE1|ARIH2|SORBS1|INPP5F|WAPL|NUP62|ZDHHC5|PTPN23|SIN3A|ATP2C1|TRAPPC12|OTUD7B|ILRUN|SESN2|TBC1D20	-2.9
GO Biological Processes	GO:2000147	positive regulation of cell motility	-5.4	ABL1|ACTG1|ACTN4|ACVR1B|AKT2|APC|RHOB|ATP7A|CDH5|CRKL|CSF1R|DAB2|EGFR|FGR|HIF1A|HMOX1|IGF1|IL1R1|INSR|JAK2|JUN|MYO1C|NEDD9|NFE2L2|NOS3|PROX1|RREB1|SP1|STAT3|TGFBR2|TJP1|PTP4A1|IRS2|NTN1|MAP4K4|RAPGEF2|ZNF609|CLASP1|AGO2|SEMA6A|JCAD|CXCL16|WNK1|CCR2	-2.9
GO Biological Processes	GO:0071375	cellular response to peptide hormone stimulus	-5.4	AKT2|APC|ZFP36L1|FOXO1|GOT1|GSK3B|HMGCS2|NR4A1|IGFBP1|INSR|JAK1|JAK2|MAP1B|NFE2L2|POR|PRKCD|PTPN1|SP1|STAT3|TYK2|IRS2|SORBS1|PLCB1|SLC39A14|ERRFI1|LPIN3	-2.8
GO Biological Processes	GO:0030335	positive regulation of cell migration	-5.4	ABL1|ACTG1|ACTN4|ACVR1B|AKT2|APC|RHOB|ATP7A|CDH5|CRKL|CSF1R|DAB2|EGFR|FGR|HIF1A|HMOX1|IGF1|IL1R1|INSR|JAK2|JUN|MYO1C|NEDD9|NFE2L2|NOS3|PROX1|RREB1|SP1|STAT3|TGFBR2|TJP1|PTP4A1|IRS2|MAP4K4|RAPGEF2|ZNF609|CLASP1|AGO2|SEMA6A|JCAD|CXCL16|WNK1|CCR2	-2.8
GO Biological Processes	GO:0048514	blood vessel morphogenesis	-5.3	ACTG1|APOD|RHOB|ZFP36L1|DAG1|EPAS1|EREG|HIF1A|HMOX1|NR4A1|RBPJ|JUN|LEPR|LOX|LRP1|MYH9|NF1|NOS3|NOTCH2|PROX1|RORA|SHB|SRF|TGFA|TGFBR2|TGFBR3|TNFAIP2|YWHAZ|SGPL1|WASF2|PAXIP1|CEMIP2|ANGPTL4|C1GALT1|ADAMTS9|ZMIZ1|PANK2|ARID2	-2.8
GO Biological Processes	GO:1901653	cellular response to peptide	-5.3	AKT2|APC|ZFP36L1|FOXO1|FOXO3|GOT1|GSK3B|HMGCS2|NR4A1|IGF1|IGFBP1|INSR|JAK1|JAK2|LRP1|MAP1B|NFE2L2|POR|PRKCD|PTPN1|SP1|STAT3|TYK2|VCAM1|IRS2|SORBS1|PLCB1|SLC39A14|ERRFI1|LPIN3	-2.8
GO Biological Processes	GO:0062012	regulation of small molecule metabolic process	-5.2	AKT2|DAB2|EGR1|EP300|FOXO1|GSK3B|HIF1A|IGF1|FOXK2|INSR|LEPR|NOS3|POR|PPARD|PROX1|RANBP2|RORA|STAT3|IRS2|NCOR2|HDAC4|NCOA2|SORBS1|GIT1|DDIT4|PANK2|SESN2|MIDN|SERPINA12|TTC39B|PLIN5	-2.7
GO Biological Processes	GO:0051028	mRNA transport	-5.2	ZFP36L1|EIF5A|KIF5C|MYO1C|NUP98|RANBP2|SUPT6H|TPR|ZFP36|SMG7|MVP|NUP153|NUP62|SENP2|THOC6|THOC3|POM121C	-2.7
GO Biological Processes	GO:0007265	Ras protein signal transduction	-5.2	RHOB|ARHGAP1|CDKN1A|CRKL|IGF1|JUN|MYO9B|NF1|RGL2|RALGDS|RREB1|ARHGAP29|NTN1|RAPGEF2|ELMO1|WASF2|RASSF1|RAB30|NKIRAS2|PLCE1|EPS8L2|RASGEF1B	-2.7
GO Biological Processes	GO:1903131	mononuclear cell differentiation	-5.1	ABL1|ATP7A|ZFP36L1|KLF6|CSF1R|EGR1|EP300|RBPJ|JUN|LEPR|MYH9|NOTCH2|PTPRJ|RELB|RORA|ST3GAL1|SRF|STAT3|TGFBR2|VCAM1|HDAC4|UBD|RC3H2|LRRC8A|PREX1|RC3H1|NFAM1	-2.7
GO Biological Processes	GO:0051272	positive regulation of cellular component movement	-5.1	ABL1|ACTG1|ACTN4|ACVR1B|AKT2|APC|RHOB|ATP7A|CDH5|CRKL|CSF1R|DAB2|EGFR|FGR|HIF1A|HMOX1|IGF1|IL1R1|INSR|JAK2|JUN|MYO1C|NEDD9|NFE2L2|NOS3|PROX1|RREB1|SP1|STAT3|TGFBR2|TJP1|PTP4A1|IRS2|NTN1|MAP4K4|RAPGEF2|ZNF609|CLASP1|AGO2|SEMA6A|JCAD|CXCL16|WNK1|CCR2	-2.6
GO Biological Processes	GO:2000113	negative regulation of cellular macromolecule biosynthetic process	-5.1	ZFP36L1|DAPK1|GSK3B|TPR|ZFP36|BTG2|PUM1|TOB1|CNOT1|TNRC6B|AGO2|RC3H2|SAMD4B|DCP1A|TNRC6C|CPEB4|SESN2|RC3H1|PATL1|YTHDF3|ACER2|MEX3D	-2.6
GO Biological Processes	GO:0040017	positive regulation of locomotion	-5.1	ABL1|ACTG1|ACTN4|ACVR1B|AKT2|APC|RHOB|ATP7A|CDH5|CRKL|CSF1R|DAB2|EGFR|FGR|HIF1A|HMOX1|IGF1|IL1R1|INSR|JAK2|JUN|MYO1C|NEDD9|NFE2L2|NOS3|PROX1|RREB1|SP1|STAT3|TGFBR2|TJP1|PTP4A1|IRS2|NTN1|MAP4K4|RAPGEF2|ZNF609|CLASP1|AGO2|SEMA6A|JCAD|CXCL16|WNK1|CCR2	-2.6
GO Biological Processes	GO:0032870	cellular response to hormone stimulus	-5.1	AKT2|APC|ATP2B1|ZFP36L1|FOXO1|FOXO3|NR5A2|GOT1|GSK3B|HMGCS2|NR4A1|IGFBP1|INSR|JAK1|JAK2|LEPR|MAP1B|NFE2L2|POR|PPARD|PRKCD|PTPN1|SP1|STAT3|THRB|TYK2|ZFP36|NCOA4|ARID1A|IRS2|NCOA2|SORBS1|PLCB1|SLC39A14|ERRFI1|DDIT4|ZMIZ1|CALCOCO1|LPIN3|PAQR7	-2.6
GO Biological Processes	GO:0035239	tube morphogenesis	-5	ABL1|ACTG1|APOD|RHOB|ZFP36L1|CSF1R|DAG1|DVL3|EGFR|EPAS1|EREG|ARHGAP35|HIF1A|HMOX1|NR4A1|RBPJ|JUN|LEPR|LOX|LRP1|MYH9|NF1|NOS3|NOTCH2|PKD1|PML|PROX1|RORA|SDC4|SHB|SKI|SRF|TGFA|TGFBR2|TGFBR3|TNFAIP2|YWHAZ|SGPL1|NTN1|MICAL2|MTSS1|WASF2|PAXIP1|PLXNB2|CEMIP2|ANGPTL4|C1GALT1|ADAMTS9|ZMIZ1|PANK2|ARID2|RBPMS2	-2.6
GO Biological Processes	GO:0031667	response to nutrient levels	-5	PLIN2|ATF3|ATP2B1|CBL|CDKN1A|CYBB|CYP8B1|FOXO1|FOXO3|FOLR2|HMGCS2|HMOX1|FOXK2|MAP1B|MAP3K5|NFE2L2|POR|PPARD|PROX1|SLC16A1|SREBF2|SRF|TGFBR2|VCAM1|ZFP36|PPM1D|XPR1|RASAL2|CHSY1|ATG14|SIK2|CLEC16A|PRKAG3|SLC38A2|CPEB4|SESN2|SLC25A25|SESN3	-2.6
GO Biological Processes	GO:1904018	positive regulation of vasculature development	-5	ABL1|RHOB|CDH5|CYBB|HIF1A|HMOX1|JAK1|SMAD1|NFE2L2|NOS3|SP1|STAT3|TGFBR2|TJP1|KLF4|AGO2|HIPK2|ANGPTL4|JCAD|HIPK1	-2.6
GO Biological Processes	GO:0045766	positive regulation of angiogenesis	-5	ABL1|RHOB|CDH5|CYBB|HIF1A|HMOX1|JAK1|SMAD1|NFE2L2|NOS3|SP1|STAT3|TGFBR2|TJP1|KLF4|AGO2|HIPK2|ANGPTL4|JCAD|HIPK1	-2.6
GO Biological Processes	GO:0017148	negative regulation of translation	-5	ZFP36L1|DAPK1|TPR|ZFP36|BTG2|PUM1|TOB1|CNOT1|TNRC6B|AGO2|RC3H2|SAMD4B|DCP1A|TNRC6C|CPEB4|SESN2|RC3H1|PATL1|YTHDF3|MEX3D	-2.5
GO Biological Processes	GO:0040008	regulation of growth	-4.9	ABL1|ACVR1B|CDKN1A|CRKL|DAB2|DUSP6|EGFR|GSK3B|HIF1A|IGF1|IGFBP1|RBPJ|INSR|MAP1B|MT2A|NEDD9|PML|PPARD|PROX1|PTPRJ|RPS6KA3|SELENOP|SRF|STAT3|TGFBR2|TGFBR3|WNT2|BAP1|SGPL1|ZPR1|SOCS3|NTN1|SLC23A2|PLCB1|SIN3A|TMEM97|FLVCR1|SOCS7|PLCE1|INO80|ATAD3A|WWC3|SEMA6A|DIP2B|CXCL16|SESN2|KIAA1109|PLXNA4|GPAT4|IGSF11	-2.5
GO Biological Processes	GO:0031347	regulation of defense response	-4.8	ADAR|BCR|SERPING1|CDH5|CREBBP|CYLD|EP300|EREG|F12|FGR|IGF1|IL1R1|IL6ST|JAK2|NFE2L2|NFKBIA|NPAS2|PPARD|PRKCD|PTPN1|RORA|SEC14L1|TNFRSF1A|TNFRSF1B|ZFP36|ZYX|BAP1|SOCS3|KLF4|CLOCK|TNIP1|SBNO2|BRD4|SAMHD1|SIN3A|GIT1|AKIRIN2|ASH1L|ZNFX1|ILRUN|C2CD4A|YTHDF3|CCR2	-2.4
GO Biological Processes	GO:0048145	regulation of fibroblast proliferation	-4.8	ABL1|CDKN1A|EGFR|EREG|FOSL2|IGF1|JUN|NF1|PML|SKI|WNT2|WAPL|ZMIZ1	-2.4
GO Biological Processes	GO:0010906	regulation of glucose metabolic process	-4.7	AKT2|EP300|FOXO1|GSK3B|IGF1|FOXK2|INSR|LEPR|RANBP2|RORA|IRS2|NCOA2|SORBS1|SESN2|MIDN|SERPINA12	-2.4
GO Biological Processes	GO:0045912	negative regulation of carbohydrate metabolic process	-4.7	AP2A1|EP300|GSK3B|LEPR|STAT3|HDAC4|GIT1|DDIT4|MIDN|SERPINA12	-2.3
GO Biological Processes	GO:0043122	regulation of I-kappaB kinase/NF-kappaB signaling	-4.7	ABL1|HMOX1|LTF|PER1|REL|RORA|S100B|TNFRSF1A|TRAF4|TNIP1|UBD|AKAP13|TAB2|BRD4|NUP62|ANKRD17|ATP2C1|NKIRAS2|CC2D1A|ASH1L|OTUD7B|PELI1|MIER1|TMEM101	-2.3
GO Biological Processes	GO:0050779	RNA destabilization	-4.7	ZFP36L1|TNFRSF1B|ZFP36|PUM1|CNOT1|AGO2|RC3H2|SAMD4B|DCP1A|RC3H1|PATL1|YTHDF3|MEX3D	-2.3
GO Biological Processes	GO:0030036	actin cytoskeleton organization	-4.7	ABL1|ACTB|ACTG1|ACTN4|RHOB|RND3|BCR|EPB41|ARHGAP35|JAK2|MEF2A|MYH9|MYH10|MYO1C|MYO1D|NEDD9|NF1|PRKAR1A|PROX1|PTPN1|SPTBN1|SRF|TJP1|TNFAIP1|TPM4|ZYX|GAS7|S1PR2|MICAL2|PHACTR2|MTSS1|ELMO1|WDR1|WASF2|SORBS1|TRIOBP|SPECC1L|ATP2C1|CTNNA3|TMOD3|PREX1|MYH14|SSH2|RFLNB	-2.3
GO Biological Processes	GO:0009991	response to extracellular stimulus	-4.6	PLIN2|ATF3|ATP2B1|CBL|CDKN1A|CYBB|CYP8B1|FOXO1|FOXO3|FOLR2|ARHGAP35|HMGCS2|HMOX1|FOXK2|MAP1B|MAP3K5|NFE2L2|POR|PPARD|PROX1|SLC16A1|SREBF2|SRF|TGFBR2|VCAM1|ZFP36|PPM1D|XPR1|RASAL2|CHSY1|ATG14|SIK2|CLEC16A|PRKAG3|SLC38A2|CPEB4|SESN2|SLC25A25|SESN3	-2.3
GO Biological Processes	GO:1902532	negative regulation of intracellular signal transduction	-4.6	ABL1|ARNTL|ATF3|CYLD|DAB2|DAG1|DUSP1|DUSP5|DUSP6|DUSP8|FOXO1|ARHGAP35|GSK3B|HIF1A|NF1|NFE2L2|PER1|PPP1R10|PRKCD|PTPN1|PTPRJ|RORA|SEC14L1|TNFAIP1|LIMD1|SH2B3|HIPK3|TNIP1|PHLPP1|NUP62|ERRFI1|DDIT4|WWC3|ASH1L|OTUD7B|SEMA6A|DUSP16|SPRY4|SESN2|KCTD10|SESN3	-2.3
GO Biological Processes	GO:0060284	regulation of cell development	-4.6	ABL1|ACTN4|ARNTL|CDH5|CRKL|DAB2|DAG1|EGR2|GSK3B|HIF1A|IGF1|IL6ST|LTF|MAP1B|MBP|NEDD9|NF1|NOTCH2|RREB1|SKI|SRF|TNFRSF1A|TNFRSF1B|VCL|WNT2|S1PR2|NTN1|CLOCK|RAPGEF2|TRIB1|TRIOBP|SPEN|PLCB1|PLXNB2|NIN|SEMA6A|PREX1|DIP2B|SPRY4|PLXNA4|RFLNB	-2.3
GO Biological Processes	GO:0034249	negative regulation of cellular amide metabolic process	-4.6	ZFP36L1|DAPK1|IGF1|TPR|ZFP36|BTG2|PUM1|TOB1|CNOT1|TNRC6B|AGO2|RC3H2|SAMD4B|DCP1A|TNRC6C|CPEB4|SESN2|RC3H1|PATL1|YTHDF3|MEX3D	-2.3
GO Biological Processes	GO:0009617	response to bacterium	-4.6	ABCA1|ABL1|BCR|CAPN2|CYP2E1|FGR|CXCL2|HMGCS2|NR4A1|IFNAR1|RBPJ|JAK2|LTF|NFKBIA|NOS3|NOTCH2|PDE4B|PPARD|PRKCD|RPS6KA3|TNFRSF1A|TNFRSF1B|VCAM1|ZFP36|RAB7A|PPM1D|MAPKAPK2|TRIB1|TNIP1|SBNO2|TAB2|ANKRD17|IGHV1-18|GIT1|AKIRIN2|ADAMTS9|PELI1|ZNFX1	-2.3
GO Biological Processes	GO:0043487	regulation of RNA stability	-4.6	ZFP36L1|PRKCD|TNFRSF1B|ZFP36|MAPKAPK2|PUM1|TOB1|CNOT1|TNRC6B|PABPC1|AGO2|RC3H2|SAMD4B|DCP1A|TNRC6C|FASTKD5|RC3H1|PATL1|YTHDF3|MEX3D	-2.3
GO Biological Processes	GO:2000112	regulation of cellular macromolecule biosynthetic process	-4.6	AKT2|ZFP36L1|DAPK1|EEF2|EIF5A|FOXO3|GSK3B|IGF1|INSR|PER1|RPS6KA3|TPR|ZFP36|BTG2|IRS2|KLF4|PUM1|SECISBP2L|TOB1|SORBS1|CNOT1|TNRC6B|PLCB1|PPP1R15A|PLXNB2|PABPC1|AGO2|RC3H2|SAMD4B|DCP1A|TNRC6C|CPEB4|SESN2|PXYLP1|RC3H1|PATL1|YTHDF3|ACER2|MEX3D	-2.3
GO Biological Processes	GO:0031669	cellular response to nutrient levels	-4.6	PLIN2|ATF3|ATP2B1|CBL|CDKN1A|FOXO1|FOXO3|FOLR2|HMOX1|MAP3K5|NFE2L2|SREBF2|SRF|PPM1D|XPR1|ATG14|SIK2|CLEC16A|PRKAG3|SLC38A2|CPEB4|SESN2|SESN3	-2.2
GO Biological Processes	GO:0043488	regulation of mRNA stability	-4.6	ZFP36L1|PRKCD|ZFP36|MAPKAPK2|PUM1|TOB1|CNOT1|TNRC6B|PABPC1|AGO2|RC3H2|SAMD4B|DCP1A|TNRC6C|FASTKD5|RC3H1|PATL1|YTHDF3|MEX3D	-2.2
GO Biological Processes	GO:0032102	negative regulation of response to external stimulus	-4.5	ADAR|BCR|SERPING1|CDH5|CYLD|DUSP1|F12|FGR|IGF1|LTF|NOS3|PPARD|PRKCD|RORA|SEC14L1|TNFRSF1A|TNFRSF1B|ZFP36|SOCS3|KLF4|SH2B3|TRIB1|INPP5F|CLASP1|SAMHD1|GIT1|ASH1L|SEMA6A|CHD8|ILRUN|RIN3|YTHDF3	-2.2
GO Biological Processes	GO:0050657	nucleic acid transport	-4.5	ZFP36L1|EIF5A|KIF5C|MYO1C|NUP98|RANBP2|SUPT6H|TGFBR2|TPR|ZFP36|SMG7|MVP|NUP153|NUP62|SENP2|THOC6|THOC3|POM121C	-2.2
GO Biological Processes	GO:0071453	cellular response to oxygen levels	-4.5	ATP6AP1|ATP7A|ZFP36L1|CBL|CYBB|EGR1|EPAS1|FOXO1|FOXO3|HIF1A|HMOX1|RBPJ|NFE2L2|PPARD|RORA|HIPK2|CPEB4|EGLN3	-2.2
GO Biological Processes	GO:0050658	RNA transport	-4.5	ZFP36L1|EIF5A|KIF5C|MYO1C|NUP98|RANBP2|SUPT6H|TGFBR2|TPR|ZFP36|SMG7|MVP|NUP153|NUP62|SENP2|THOC6|THOC3|POM121C	-2.2
GO Biological Processes	GO:1902893	regulation of miRNA transcription	-4.5	EGR1|FOXO3|HIF1A|JUN|SMAD1|NFATC3|PPARD|SREBF2|SRF|STAT3|KLF4	-2.2
GO Biological Processes	GO:0042594	response to starvation	-4.5	PLIN2|ATF3|CBL|CDKN1A|FOXO1|FOXO3|HMGCS2|FOXK2|MAP3K5|NFE2L2|SREBF2|ZFP36|PPM1D|XPR1|ATG14|SIK2|CLEC16A|PRKAG3|SLC38A2|CPEB4|SESN2|SESN3	-2.2
GO Biological Processes	GO:0010677	negative regulation of cellular carbohydrate metabolic process	-4.5	EP300|GSK3B|LEPR|STAT3|HDAC4|GIT1|DDIT4|MIDN|SERPINA12	-2.2
GO Biological Processes	GO:0031668	cellular response to extracellular stimulus	-4.5	PLIN2|ATF3|ATP2B1|CBL|CDKN1A|FOXO1|FOXO3|FOLR2|ARHGAP35|HMOX1|MAP3K5|NFE2L2|SREBF2|SRF|VCAM1|PPM1D|XPR1|ATG14|SIK2|CLEC16A|PRKAG3|SLC38A2|CPEB4|SESN2|SESN3	-2.2
GO Biological Processes	GO:0045936	negative regulation of phosphate metabolic process	-4.4	ABL1|ADAR|APC|CBL|CDKN1A|CRKL|DUSP1|DUSP6|GSK3B|JUN|LRP1|NF1|PRKAR1A|PRKCD|PTPN1|PTPRJ|STAT3|IRS2|IQGAP1|SOCS3|HDAC4|MVP|SH2B3|HIPK3|TRIB1|ATG14|INPP5F|NUP62|PPP1R15A|GIT1|ERRFI1|DDIT4|DUSP16|SPRY4|MIDN|BOD1L1	-2.2
GO Biological Processes	GO:0061013	regulation of mRNA catabolic process	-4.4	ZFP36L1|PRKCD|ZFP36|BTG2|MAPKAPK2|PUM1|TOB1|CNOT1|TNRC6B|PABPC1|AGO2|RC3H2|SAMD4B|DCP1A|TNRC6C|FASTKD5|RC3H1|PATL1|YTHDF3|MEX3D	-2.2
GO Biological Processes	GO:0051236	establishment of RNA localization	-4.4	ZFP36L1|EIF5A|KIF5C|MYO1C|NUP98|RANBP2|SUPT6H|TGFBR2|TPR|ZFP36|SMG7|MVP|NUP153|NUP62|SENP2|THOC6|THOC3|POM121C	-2.2
GO Biological Processes	GO:0010563	negative regulation of phosphorus metabolic process	-4.4	ABL1|ADAR|APC|CBL|CDKN1A|CRKL|DUSP1|DUSP6|GSK3B|JUN|LRP1|NF1|PRKAR1A|PRKCD|PTPN1|PTPRJ|STAT3|IRS2|IQGAP1|SOCS3|HDAC4|MVP|SH2B3|HIPK3|TRIB1|ATG14|INPP5F|NUP62|PPP1R15A|GIT1|ERRFI1|DDIT4|DUSP16|SPRY4|MIDN|BOD1L1	-2.2
GO Biological Processes	GO:0043086	negative regulation of catalytic activity	-4.4	ABL1|ADAR|APC|SERPING1|C4A|CBL|CDKN1A|DUSP1|GSK3B|NR4A1|ITIH1|LEPR|LRP1|LTF|NF1|NOS3|SERPINB10|POR|PPP1R10|PRKAR1A|PRKCD|PTPN1|PTPRJ|PZP|RPS6KA3|ZFP36|IRS2|IQGAP1|SOCS3|KLF4|PHACTR2|MVP|SH2B3|HIPK3|TRIB1|SLC39A14|NUP62|PPP1R15A|ANGPTL4|PPME1|ERRFI1|WNK1|UBE2Z|DUSP16|SPRY4|ITPRIP|MIDN|SERPINA12|BOD1L1|PLIN5|CCR2	-2.2
GO Biological Processes	GO:0031032	actomyosin structure organization	-4.4	ACTG1|EPB41|MEF2A|MYH9|MYH10|PRKAR1A|PROX1|SRF|TJP1|TNFAIP1|ZYX|WDR1|SORBS1|TMOD3|MYH14	-2.2
GO Biological Processes	GO:0030336	negative regulation of cell migration	-4.3	APOD|RHOB|BCR|DAG1|DUSP1|FOXO3|HMOX1|LRP1|MITF|NF1|NFE2L2|PPARD|PTPRJ|SRF|STAT3|VCL|S1PR2|KLF4|TRIB1|PLCB1|CLASP1|PTPN23|SIN3A|ADAMTS9|SAP130|RIN3|ARID2	-2.1
GO Biological Processes	GO:1901522	positive regulation of transcription from RNA polymerase II promoter involved in cellular response to chemical stimulus	-4.3	EP300|HIF1A|RBPJ|JUN|SMAD1|NFE2L2|SESN2	-2.1
GO Biological Processes	GO:0060397	growth hormone receptor signaling pathway via JAK-STAT	-4.3	JAK1|JAK2|PTPN1|STAT3|TYK2	-2.1
GO Biological Processes	GO:0045725	positive regulation of glycogen biosynthetic process	-4.3	AKT2|IGF1|INSR|IRS2|SORBS1	-2.1
GO Biological Processes	GO:0045860	positive regulation of protein kinase activity	-4.3	ABL1|CDKN1A|CSF1R|DAG1|DVL3|EGFR|EGR1|EREG|IGF1|INSR|JAK2|LTF|MAP3K5|NEDD9|PKD1|PRKCD|PROX1|PTPN1|SDC4|TGFA|TGFBR2|AXIN1|IQGAP1|TRAF4|RAPGEF2|DAZAP2|AKAP13|TAB2|TAOK1|WNK1|ZFP91|MOB3A|CCNYL1	-2.1
GO Biological Processes	GO:0046578	regulation of Ras protein signal transduction	-4.3	ABCA1|ABL1|BCR|CBL|ARHGAP35|IGF1|MYO9B|NF1|NOTCH2|RGL2|TNFAIP1|MAP4K4|DENND4A|AKAP13|PSD3|NUP62|PLCE1|DENND1A|EPS8L2|SPRY4|KCTD10	-2.1
GO Biological Processes	GO:0030323	respiratory tube development	-4.3	ATP7A|DAG1|EP300|EPAS1|HMGCS2|RBPJ|LOX|NOS3|PKD1|PROX1|SRF|TGFBR2|THRB|WNT2|YWHAZ|TRAF4|NKIRAS2|ERRFI1|RC3H2|STK40	-2.1
GO Biological Processes	GO:0032496	response to lipopolysaccharide	-4.3	ABCA1|ABL1|BCR|CAPN2|CXCL2|HMGCS2|NR4A1|IFNAR1|JAK2|NFKBIA|NOS3|PDE4B|PPARD|RPS6KA3|TNFRSF1B|VCAM1|ZFP36|MAPKAPK2|TRIB1|TNIP1|SBNO2|TAB2|GIT1|AKIRIN2|PELI1	-2.1
GO Biological Processes	GO:0071559	response to transforming growth factor beta	-4.2	ABL1|ZFHX3|ZFP36L1|CDH5|CRKL|DAB2|JUN|SMAD1|PML|SKI|STAT3|TGFBR2|TGFBR3|WNT2|ZYX|HIPK2|SOX6|ZMIZ1	-2
GO Biological Processes	GO:0040007	growth	-4.2	ABL1|APOD|BCL9|ZFP36L1|CDKN1A|DAG1|EP300|EREG|FOXO3|IGF1|IGFBP1|LEPR|SMAD1|MAP1B|NOTCH2|PRKAR1A|SRF|TGFBR2|TGFBR3|VCL|IQGAP1|ZPR1|RASAL2|ARIH2|AKAP13|FLVCR1|NIN|RC3H2|ZMIZ1|STK40|SLC25A25|ARID2	-2
GO Biological Processes	GO:0048589	developmental growth	-4.2	ABL1|APOD|BCL9|ZFP36L1|CDKN1A|DAG1|EP300|EREG|FOXO3|IGF1|IGFBP1|LEPR|SMAD1|MAP1B|NOTCH2|PRKAR1A|SRF|TGFBR2|TGFBR3|VCL|IQGAP1|ZPR1|RASAL2|ARIH2|AKAP13|FLVCR1|NIN|RC3H2|ZMIZ1|STK40|SLC25A25|ARID2	-2
GO Biological Processes	GO:0006403	RNA localization	-4.2	ZFP36L1|EIF5A|KIF5C|MYO1C|NUP98|RANBP2|SUPT6H|TGFBR2|TPR|ZFP36|SMG7|MVP|NUP153|NUP62|SENP2|THOC6|THOC3|MEX3D|POM121C	-2
GO Biological Processes	GO:0030522	intracellular receptor signaling pathway	-4.2	ACTN4|CRKL|CYLD|NR5A2|NR4A1|JAK2|NFKBIA|PML|PPARD|RORA|STAT3|THRB|NCOA4|ARID1A|NCOA2|ZMIZ1|CALCOCO1	-2
GO Biological Processes	GO:0018205	peptidyl-lysine modification	-4.2	ACTB|ATP7A|CREBBP|EGR2|EP300|LOX|PER1|PML|POR|RANBP2|ATXN7|CLOCK|HDAC4|SRCAP|PAXIP1|NCOA6|USP22|BRPF3|KMT5B|YEATS2|ASH1L|KMT2C|SENP2|CAMKMT|SETD7|DOT1L|TADA2B|BOD1L1	-2
GO Biological Processes	GO:0032922	circadian regulation of gene expression	-4.2	ARNTL|ZFHX3|EGR1|NPAS2|PER1|PML|RELB|RORA|TOP1|CLOCK|HUWE1|NCOA2	-2
GO Biological Processes	GO:0061157	mRNA destabilization	-4.2	ZFP36L1|ZFP36|PUM1|CNOT1|AGO2|RC3H2|SAMD4B|DCP1A|RC3H1|PATL1|YTHDF3|MEX3D	-2
GO Biological Processes	GO:0051271	negative regulation of cellular component movement	-4.2	APOD|RHOB|BCR|DAG1|DUSP1|FOXO3|HMOX1|LRP1|MITF|NF1|NFE2L2|PPARD|PTPRJ|SRF|STAT3|TGFBR3|VCL|S1PR2|KLF4|TRIB1|PLCB1|CLASP1|PTPN23|SIN3A|ADAMTS9|SAP130|RIN3|ARID2	-2
GO Biological Processes	GO:0042326	negative regulation of phosphorylation	-4.2	ABL1|ADAR|APC|CBL|CDKN1A|CRKL|DUSP1|DUSP6|JUN|LRP1|NF1|PRKAR1A|PRKCD|PTPN1|PTPRJ|STAT3|IRS2|SOCS3|HDAC4|MVP|SH2B3|HIPK3|TRIB1|ATG14|INPP5F|NUP62|GIT1|ERRFI1|DDIT4|DUSP16|SPRY4|MIDN	-2
GO Biological Processes	GO:0022604	regulation of cell morphogenesis	-4.1	ABL1|ACTN4|RHOB|RND3|CRKL|CSF1R|DAB2|DAG1|DVL3|EPB41|FGR|ARHGAP35|MSN|MYH9|MYH10|NEDD9|RREB1|LIMD1|WDR1|SLC23A2|TRIOBP|PLXNB2|ZRANB1|PREX1|MYH14|SPRY4|PLXNA4|SH3D19|BCL9L	-2
GO Biological Processes	GO:0050727	regulation of inflammatory response	-4.1	BCR|CDH5|CYLD|F12|FGR|IGF1|IL1R1|IL6ST|JAK2|NFKBIA|PPARD|PRKCD|RORA|TNFRSF1A|TNFRSF1B|ZFP36|ZYX|BAP1|SOCS3|KLF4|CLOCK|TNIP1|SBNO2|BRD4|GIT1|ASH1L|C2CD4A|CCR2	-2
GO Biological Processes	GO:0043255	regulation of carbohydrate biosynthetic process	-4.1	AP2A1|AKT2|EP300|FOXO1|GSK3B|IGF1|INSR|LEPR|RANBP2|IRS2|SORBS1|SESN2|SERPINA12	-1.9
GO Biological Processes	GO:0070875	positive regulation of glycogen metabolic process	-4.1	AKT2|IGF1|INSR|IRS2|SORBS1	-1.9
GO Biological Processes	GO:0031629	synaptic vesicle fusion to presynaptic active zone membrane	-4.1	STX2|SNAP25|STX11|SNAP23|STX1B	-1.9
GO Biological Processes	GO:0051098	regulation of binding	-4.1	ABL1|ACTB|CDKN1A|DAB2|EP300|EPB41|GSK3B|HMOX1|IGF1|JAK2|JUN|LOX|LRP1|NFKBIA|PKD1|PRKCD|PTPRF|SKI|TGFBR3|SYMPK|KLF4|RAPGEF2|HDAC4|CARM1|WAPL|SIN3A|HIPK2|SENP2|ILRUN|HMBOX1|DOT1L	-1.9
GO Biological Processes	GO:0061061	muscle structure development	-4	ACTG1|ACTN4|ZFHX3|ATF3|BCL9|CAPN2|DAG1|EGR1|EGR2|EP300|EPAS1|NR4A1|IFRD1|IGF1|RBPJ|LOX|MEF2A|MYH9|NF1|PRKAR1A|PROX1|RORA|SDC1|SKI|SRF|TGFBR3|WNT2|BTG2|WDR1|AKAP13|ZNF609|PLD3|TMOD3|KMT5B|SOX6|MYH14|ZNF689	-1.9
GO Biological Processes	GO:0036294	cellular response to decreased oxygen levels	-4	ATP7A|ZFP36L1|CBL|CYBB|EGR1|EPAS1|FOXO3|HIF1A|HMOX1|RBPJ|NFE2L2|PPARD|RORA|HIPK2|CPEB4|EGLN3	-1.9
GO Biological Processes	GO:0071560	cellular response to transforming growth factor beta stimulus	-4	ABL1|ZFP36L1|CDH5|CRKL|DAB2|JUN|SMAD1|PML|SKI|STAT3|TGFBR2|TGFBR3|WNT2|ZYX|HIPK2|SOX6|ZMIZ1	-1.9
GO Biological Processes	GO:0048008	platelet-derived growth factor receptor signaling pathway	-4	ABL1|JAK2|LOX|PTPN1|PTPRJ|ZFAND5|IQGAP1|SGPL1	-1.9
GO Biological Processes	GO:0035633	maintenance of blood-brain barrier	-4	ACTB|ACTG1|CDH5|LAMC1|MBP|TJP1|VCL|TJP2	-1.9
GO Biological Processes	GO:0045765	regulation of angiogenesis	-4	ABL1|RHOB|CDH5|CYBB|HIF1A|HMOX1|JAK1|SMAD1|NF1|NFE2L2|NOS3|PML|SP1|STAT3|TGFBR2|TJP1|KLF4|CEMIP2|AGO2|HIPK2|ANGPTL4|ADAMTS9|SEMA6A|JCAD|HIPK1|CCR2	-1.9
GO Biological Processes	GO:2000146	negative regulation of cell motility	-4	APOD|RHOB|BCR|DAG1|DUSP1|FOXO3|HMOX1|LRP1|MITF|NF1|NFE2L2|PPARD|PTPRJ|SRF|STAT3|VCL|S1PR2|KLF4|TRIB1|PLCB1|CLASP1|PTPN23|SIN3A|ADAMTS9|SAP130|RIN3|ARID2	-1.9
GO Biological Processes	GO:1902895	positive regulation of miRNA transcription	-4	EGR1|FOXO3|HIF1A|JUN|SMAD1|SREBF2|SRF|STAT3|KLF4	-1.9
GO Biological Processes	GO:0007264	small GTPase mediated signal transduction	-4	RHOB|RND3|ARHGAP1|BCR|CDKN1A|CRKL|HMOX1|IGF1|JUN|MYO9B|NF1|RGL2|RALGDS|RREB1|ARHGAP29|NTN1|RAPGEF2|ELMO1|WASF2|RASSF1|RAB30|NKIRAS2|PLCE1|EPS8L2|RASGEF1B	-1.9
GO Biological Processes	GO:0006325	chromatin organization	-4	ACTB|CHD4|EP300|HMGA1|JAK2|PHF2|SUPT6H|TOP1|ARID1A|AXIN1|BAP1|SMARCA5|PPM1D|BCL7B|CDYL|HDAC4|CARM1|SRCAP|RAD54L2|USP22|BRD4|BRPF3|UBN1|KMT5B|WAC|KDM3B|INO80|GATAD2A|BCOR|YEATS2|ASH1L|EMSY|ZNFX1|GATAD2B|ARID1B|CHD8|MIER1|KMT2C|SETD7|DOT1L|TADA2B|ARID2	-1.8
GO Biological Processes	GO:0043407	negative regulation of MAP kinase activity	-3.9	DUSP1|NF1|PRKCD|PTPN1|PTPRJ|SH2B3|HIPK3|NUP62|DUSP16|SPRY4	-1.8
GO Biological Processes	GO:1903670	regulation of sprouting angiogenesis	-3.9	JAK1|SMAD1|TJP1|KLF4|CEMIP2|ADAMTS9|SEMA6A|JCAD	-1.8
GO Biological Processes	GO:0030330	DNA damage response, signal transduction by p53 class mediator	-3.9	CDKN1A|FOXO3|PML|PPM1D|PAXIP1|HIPK2|SESN2|ACER2	-1.8
GO Biological Processes	GO:0009792	embryo development ending in birth or egg hatching	-3.9	ABL1|ACVR1B|ATP7A|ZFP36L1|CAPN2|DVL3|EGFR|EP300|EPAS1|NR5A2|ARHGAP35|HIF1A|RBPJ|ND4|MYH9|NF1|NOS3|NOTCH2|PKD1|PROX1|SDC4|SKI|SRF|SUPT6H|TGFBR2|WNT2|ZFAND5|AXIN1|ZPR1|SOCS3|CNOT1|USP22|PLXNB2|SIN3A|SLC39A1|FLVCR1|BCOR|AKIRIN2|SULF2|SMG9|OTUD7B|ZMIZ1|CHD8|SENP2|CMIP|ZNF358	-1.8
GO Biological Processes	GO:0070507	regulation of microtubule cytoskeleton organization	-3.9	ABL1|APC|CDH5|CYLD|GSK3B|MAP1A|MAP1B|NUMA1|PKD1|ATXN7|TPR|RASSF1|CAMSAP2|CLASP1|NUP62|GIT1|NIN|TAOK1	-1.8
GO Biological Processes	GO:0030029	actin filament-based process	-3.9	ABL1|ACTB|ACTG1|ACTN4|RHOB|RND3|BCR|EPB41|ARHGAP35|JAK2|MEF2A|MYH9|MYH10|MYO1C|MYO1D|MYO9B|NEDD9|NF1|PRKAR1A|PROX1|PTPN1|SPTBN1|SRF|TJP1|TNFAIP1|TPM4|ZYX|GAS7|S1PR2|MICAL2|PHACTR2|MTSS1|ELMO1|WDR1|WASF2|SORBS1|TRIOBP|SPECC1L|ATP2C1|CTNNA3|TMOD3|PREX1|MYH14|SSH2|RFLNB	-1.8
GO Biological Processes	GO:0030324	lung development	-3.9	ATP7A|DAG1|EP300|EPAS1|HMGCS2|RBPJ|LOX|NOS3|PKD1|PROX1|SRF|TGFBR2|THRB|WNT2|YWHAZ|NKIRAS2|ERRFI1|RC3H2|STK40	-1.8
GO Biological Processes	GO:0150105	protein localization to cell-cell junction	-3.9	ACTB|ACTG1|CDH5|JAK1|TJP1|TJP2	-1.8
GO Biological Processes	GO:0048732	gland development	-3.9	ABL1|AKT2|ATP7A|CRKL|CSF1R|DAG1|EGFR|ARHGAP35|HIF1A|HMGCS2|HMOX1|RBPJ|INSR|JAK2|JUN|MSN|NF1|NOTCH2|PHF2|PKD1|PML|PROX1|SRF|TGFA|TGFBR2|TGFBR3|WNT2|IRS2|NTN1|NCOR2|ASH1L|GPAT4	-1.8
GO Biological Processes	GO:0002237	response to molecule of bacterial origin	-3.9	ABCA1|ABL1|BCR|CAPN2|CXCL2|HMGCS2|NR4A1|IFNAR1|JAK2|NFKBIA|NOS3|PDE4B|PPARD|RPS6KA3|TNFRSF1B|VCAM1|ZFP36|MAPKAPK2|TRIB1|TNIP1|SBNO2|TAB2|GIT1|AKIRIN2|PELI1	-1.8
GO Biological Processes	GO:1901342	regulation of vasculature development	-3.9	ABL1|RHOB|CDH5|CYBB|HIF1A|HMOX1|JAK1|SMAD1|NF1|NFE2L2|NOS3|PML|SP1|STAT3|TGFBR2|TJP1|KLF4|CEMIP2|AGO2|HIPK2|ANGPTL4|ADAMTS9|SEMA6A|JCAD|HIPK1|CCR2	-1.8
GO Biological Processes	GO:0001701	in utero embryonic development	-3.9	ACVR1B|ATP7A|ZFP36L1|CAPN2|EGFR|EPAS1|HIF1A|RBPJ|ND4|MYH9|NOS3|NOTCH2|PKD1|SRF|SUPT6H|TGFBR2|WNT2|ZFAND5|AXIN1|ZPR1|SOCS3|CNOT1|SIN3A|SLC39A1|FLVCR1|BCOR|SMG9|OTUD7B|ZMIZ1|CHD8|SENP2|CMIP	-1.8
GO Biological Processes	GO:0030098	lymphocyte differentiation	-3.9	ABL1|ATP7A|ZFP36L1|KLF6|EGR1|EP300|RBPJ|LEPR|NOTCH2|PTPRJ|RELB|RORA|ST3GAL1|SRF|STAT3|VCAM1|HDAC4|RC3H2|LRRC8A|PREX1|RC3H1|NFAM1	-1.8
GO Biological Processes	GO:0045661	regulation of myoblast differentiation	-3.9	ACTB|ZFP36L1|FLOT2|MAP3K5|PPARD|ARID1A|PLCB1|LRRC8A|ARID1B|ARID2	-1.8
GO Biological Processes	GO:0099500	vesicle fusion to plasma membrane	-3.8	STX2|SNAP25|STX11|SNAP23|STX1B	-1.8
GO Biological Processes	GO:0010810	regulation of cell-substrate adhesion	-3.8	ABL1|ACTG1|ACTN4|APOD|CRKL|DAB2|DAG1|GSK3B|JAK2|NEDD9|NF1|PTPRJ|RREB1|SDC4|VCL|MAP4K4|TRIOBP|CLASP1|PREX1|PEAK1|SPRY4|ACER2	-1.8
GO Biological Processes	GO:0048511	rhythmic process	-3.8	ARNTL|ZFHX3|CREBBP|CREM|EGR1|EP300|EREG|FOXO3|GSK3B|NFKB2|NOS3|NPAS2|PER1|PML|PROX1|RELB|RORA|SP1|TOP1|SGPL1|CLOCK|NCOR2|HUWE1|NCOA2|SIN3A	-1.8
GO Biological Processes	GO:1905953	negative regulation of lipid localization	-3.8	ABCA1|AKT2|NFKBIA|PPARD|SREBF2|IRS2|PNPLA2|TTC39B	-1.8
GO Biological Processes	GO:0007259	receptor signaling pathway via JAK-STAT	-3.8	CSF2RA|IFNAR1|JAK1|JAK2|PKD1|STAT3|SOCS3|CCR2	-1.8
GO Biological Processes	GO:0097696	receptor signaling pathway via STAT	-3.8	CSF2RA|IFNAR1|JAK1|JAK2|PKD1|STAT3|SOCS3|CCR2	-1.8
GO Biological Processes	GO:0031348	negative regulation of defense response	-3.8	ADAR|BCR|SERPING1|CDH5|CYLD|FGR|IGF1|PPARD|PRKCD|RORA|SEC14L1|TNFRSF1A|TNFRSF1B|ZFP36|SOCS3|KLF4|SAMHD1|GIT1|ASH1L|ILRUN|YTHDF3	-1.8
GO Biological Processes	GO:0043502	regulation of muscle adaptation	-3.8	DAG1|FOXO1|FOXO3|IGF1|IL6ST|MEF2A|NOS3|TNFRSF1A|TNFRSF1B|HDAC4|PRKAG3|ERRFI1	-1.8
GO Biological Processes	GO:0001775	cell activation	-3.8	ABL1|ACTB|ACTG1|ATP7A|ZFP36L1|CBL|KLF6|EGR1|ELF4|EP300|IGF1|RBPJ|JAK2|JUN|LEPR|LRP1|MSN|MYH9|NFKB2|NOTCH2|PRKCD|PTPRJ|RELB|RORA|ST3GAL1|SRF|STAT3|TGFBR2|VCAM1|VCL|SNAP23|HDAC4|UBD|SBNO2|PLCB1|KIF13B|RC3H2|LRRC8A|PREX1|WDFY4|RC3H1|NFAM1	-1.8
GO Biological Processes	GO:0007173	epidermal growth factor receptor signaling pathway	-3.8	ABL1|CBL|EGFR|EREG|TGFA|IQGAP1|PLCE1|KIF16B|GAREM1	-1.8
GO Biological Processes	GO:0042059	negative regulation of epidermal growth factor receptor signaling pathway	-3.8	CBL|EGFR|PTPRJ|RAB7A|MVP|NUP62|ERRFI1	-1.8
GO Biological Processes	GO:0036015	response to interleukin-3	-3.8	GSK3B|JAK2|MT2A|SH2B3	-1.8
GO Biological Processes	GO:0036016	cellular response to interleukin-3	-3.8	GSK3B|JAK2|MT2A|SH2B3	-1.8
GO Biological Processes	GO:0060322	head development	-3.8	ABL1|ACTB|APOD|ZFHX3|ATP2B1|ATP7A|BCR|CRKL|CSF1R|EGFR|EGR2|EP300|FOXO3|ARHGAP35|GSK3B|HIF1A|HMGCS2|RBPJ|SMAD1|MBP|ND4|NF1|PAFAH1B2|PROX1|RORA|SELENOP|SKI|SRF|TGFBR2|WNT2|ZFAND5|BTG2|AXIN1|IRS2|NAPA|SGPL1|RAPGEF2|FAIM2|NCOA6|CIC|PLCB1|PLXNB2|SIN3A|GIT1|FLVCR1|ANKRD11|NIN|SLC38A2|DDIT4|SOX6|SMG9|ZMIZ1|CHD8|PLXNA4|AMIGO2	-1.7
GO Biological Processes	GO:0080135	regulation of cellular response to stress	-3.7	ABL1|ACTB|CREBBP|CYLD|DUSP1|EGFR|EP300|FOXO1|FOXO3|GSK3B|HIF1A|MAP3K5|NFE2L2|NPAS2|PER1|PML|PPP1R10|PRKCD|PTPN1|PTPRF|ATXN7|ARID1A|AXIN1|SMARCA5|MAPKAPK2|BCL7B|KLF4|MAP4K4|TRAF4|HIPK3|GADD45G|INPP5F|PAXIP1|POGZ|PLCB1|PHLPP1|USP22|PPP1R15A|HIPK2|KMT5B|SLC38A2|INO80|ARID1B|TAOK1|KLHL15|DUSP16|TMEM259|TADA2B|ARID2|RELL1	-1.7
GO Biological Processes	GO:0070849	response to epidermal growth factor	-3.7	ZFP36L1|DAB2|EGFR|TPR|ZFP36|IQGAP1|ZPR1|ERRFI1|GAREM1	-1.7
GO Biological Processes	GO:0051493	regulation of cytoskeleton organization	-3.7	ABL1|ACTG1|APC|RHOB|RND3|CAPN2|CDH5|CSF1R|CYLD|ARHGAP35|GSK3B|LRP1|MAP1A|MAP1B|NOTCH2|NUMA1|PKD1|PRKCD|PROX1|ATXN7|SDC4|SPTBN1|TJP1|TPR|PPFIA1|IQGAP1|MTSS1|WDR1|WASF2|TRIOBP|RASSF1|AKAP13|CAMSAP2|CLASP1|NUP62|GIT1|TMOD3|NIN|TAOK1|SSH2	-1.7
GO Biological Processes	GO:0032868	response to insulin	-3.7	AKT2|APC|ZFP36L1|EGR1|EGR2|FOXO1|GOT1|GSK3B|HMGCS2|IGFBP1|INSR|PTPN1|SP1|IRS2|SORBS1|SLC39A14|KBTBD2|ERRFI1|LPIN3|SESN2|SESN3	-1.7
GO Biological Processes	GO:0015931	nucleobase-containing compound transport	-3.7	ZFP36L1|EIF5A|KIF5C|MYO1C|NUP98|RANBP2|SUPT6H|TGFBR2|TPR|ZFP36|SMG7|MVP|NUP153|NUP62|LRRC8A|SENP2|THOC6|THOC3|SLC25A25|POM121C	-1.7
GO Biological Processes	GO:0060541	respiratory system development	-3.7	ATP7A|DAG1|EP300|EPAS1|HMGCS2|RBPJ|LOX|NOS3|PKD1|PROX1|SKI|SRF|TGFBR2|THRB|WNT2|YWHAZ|NKIRAS2|ERRFI1|RC3H2|STK40	-1.7
GO Biological Processes	GO:0038127	ERBB signaling pathway	-3.7	ABL1|CBL|EGFR|EREG|TGFA|IQGAP1|MVP|PLCE1|KIF16B|GAREM1	-1.7
GO Biological Processes	GO:0035335	peptidyl-tyrosine dephosphorylation	-3.7	DUSP1|DUSP5|DUSP6|DUSP8|PTPN1|PTPRE|PTPRF|PTPRJ|PTP4A1|PTP4A2|PTPN23|DUSP16|SSH2	-1.7
GO Biological Processes	GO:0071496	cellular response to external stimulus	-3.7	PLIN2|ATF3|ATP2B1|CBL|CDKN1A|DAG1|FOXO1|FOXO3|FOLR2|ARHGAP35|HMOX1|MAP3K5|NFE2L2|SREBF2|SRF|TNFRSF1A|VCAM1|PPM1D|XPR1|ATG14|SIK2|CLEC16A|PRKAG3|SLC38A2|CPEB4|SESN2|SESN3	-1.7
GO Biological Processes	GO:0008285	negative regulation of cell population proliferation	-3.7	APC|APOD|CDH5|CDKN1A|CSF1R|DAB2|DUSP1|EREG|HMGA1|HMOX1|RBPJ|INPP5D|JAK2|JUN|SMAD1|NF1|NOS3|PML|PPARD|PRKAR1A|PROX1|PTPRJ|PLAAT4|SDC4|SKI|SRF|STAT3|STRN|TGFBR2|TGFBR3|BTG2|BAP1|PPM1D|S1PR2|KLF4|RAPGEF2|MTSS1|SH2B3|TOB1|TRIB1|CHERP|TOB2|NUP62|PELI1|CLMN|RC3H1|ARID2	-1.7
GO Biological Processes	GO:0009267	cellular response to starvation	-3.6	PLIN2|ATF3|CDKN1A|FOXO1|FOXO3|MAP3K5|NFE2L2|SREBF2|PPM1D|XPR1|ATG14|SIK2|CLEC16A|PRKAG3|SLC38A2|CPEB4|SESN2|SESN3	-1.6
GO Biological Processes	GO:0006979	response to oxidative stress	-3.6	ABL1|APOD|RHOB|ARNTL|ATP7A|CAPN2|CYP2E1|DAPK1|EGFR|EPAS1|STX2|FOXO1|FOXO3|GPX3|HIF1A|HMOX1|JAK2|JUN|MAP3K5|ND6|NFE2L2|NOS3|PML|PRKCD|SDC1|SELENOP|SP1|SLC23A2|SIN3A|SESN2	-1.6
GO Biological Processes	GO:0008286	insulin receptor signaling pathway	-3.6	AKT2|APC|FOXO1|GSK3B|IGFBP1|INSR|PTPN1|IRS2|SORBS1|SLC39A14	-1.6
GO Biological Processes	GO:0033674	positive regulation of kinase activity	-3.6	ABL1|CDKN1A|CSF1R|DAG1|DVL3|EGFR|EGR1|EREG|FGR|IGF1|INSR|JAK2|LTF|MAP3K5|NEDD9|PKD1|PRKCD|PROX1|PTPN1|RANBP2|SDC4|TGFA|TGFBR2|AXIN1|IQGAP1|TRAF4|RAPGEF2|DAZAP2|AKAP13|ATG14|TAB2|TAOK1|WNK1|ZFP91|MOB3A|CCNYL1	-1.6
GO Biological Processes	GO:0090287	regulation of cellular response to growth factor stimulus	-3.6	ABL1|CDH5|CREBBP|DAB2|EP300|HIF1A|RBPJ|LOX|MYO1C|NOTCH2|NUMA1|PTPN1|SKI|TGFBR3|AXIN1|ZEB2|TOB1|FST|SIN3A|HIPK2|SULF2|SEMA6A|JCAD|SAP130|SPRY4|BCL9L|RBPMS2	-1.6
GO Biological Processes	GO:0046326	positive regulation of glucose import	-3.6	AKT2|IGF1|INSR|MEF2A|NFE2L2|IRS2|SORBS1	-1.6
GO Biological Processes	GO:0045321	leukocyte activation	-3.6	ABL1|ATP7A|ZFP36L1|CBL|KLF6|EGR1|ELF4|EP300|RBPJ|JAK2|JUN|LEPR|MSN|MYH9|NOTCH2|PRKCD|PTPRJ|RELB|RORA|ST3GAL1|SRF|STAT3|TGFBR2|VCAM1|SNAP23|HDAC4|UBD|SBNO2|KIF13B|RC3H2|LRRC8A|PREX1|WDFY4|RC3H1|NFAM1	-1.6
GO Biological Processes	GO:0045785	positive regulation of cell adhesion	-3.6	ABL1|ACTB|ANK3|ZFHX3|CRKL|DAB2|DAG1|FOXO3|FLOT2|GSK3B|IGF1|IL6ST|JAK1|JAK2|LAMC1|NEDD9|PTPRJ|RREB1|SDC4|SLC7A1|TGFBR2|TJP1|TYK2|VCAM1|ARID1A|MAP4K4|TRIOBP|PTPN23|ZMIZ1|ARID1B|PREX1|ARID2|CCR2	-1.6
GO Biological Processes	GO:0043244	regulation of protein-containing complex disassembly	-3.5	APC|EIF5A|INSR|MAP1A|MAP1B|ATXN7|SPTBN1|WDR1|TRIOBP|CAMSAP2|CLEC16A|CLASP1|TMOD3|SCAF4|TAOK1	-1.6
GO Biological Processes	GO:0090100	positive regulation of transmembrane receptor protein serine/threonine kinase signaling pathway	-3.5	ACVR1B|CDH5|CREBBP|DAB2|EP300|RBPJ|JAK2|NOTCH2|NUMA1|TGFBR2|TGFBR3|AXIN1|ZEB2|HIPK2	-1.6
GO Biological Processes	GO:0031110	regulation of microtubule polymerization or depolymerization	-3.5	ABL1|APC|CDH5|MAP1A|MAP1B|NUMA1|ATXN7|CAMSAP2|CLASP1|GIT1|NIN|TAOK1	-1.6
GO Biological Processes	GO:0045596	negative regulation of cell differentiation	-3.5	ABCA1|ACTB|ACTN4|ARNTL|ZFP36L1|EGFR|EREG|FOXO1|FOXO3|GSK3B|IGF1|RBPJ|INPP5D|LTF|SMAD1|MBP|NF1|NFATC3|NFE2L2|NFKBIA|PPARD|RORA|SKI|STAT3|ZFP36|AXIN1|LIMD1|BCL7B|NTN1|RAPGEF2|HDAC4|TOB1|TRIB1|FST|TOB2|ANKRD17|RC3H2|SOX6|SEMA6A|DIP2B|SPRY4|RC3H1|RBPMS2|RFLNB	-1.6
GO Biological Processes	GO:0061072	iris morphogenesis	-3.5	HIF1A|WNT2|HIPK2|HIPK1	-1.5
GO Biological Processes	GO:0040013	negative regulation of locomotion	-3.5	APOD|RHOB|BCR|DAG1|DUSP1|FOXO3|HMOX1|LRP1|MITF|NF1|NFE2L2|PPARD|PTPRJ|SRF|STAT3|VCL|S1PR2|KLF4|TRIB1|PLCB1|CLASP1|PTPN23|SIN3A|ADAMTS9|SEMA6A|SAP130|RIN3|ARID2	-1.5
GO Biological Processes	GO:0071901	negative regulation of protein serine/threonine kinase activity	-3.5	ABL1|APC|CDKN1A|DUSP1|NF1|PRKAR1A|PRKCD|PTPN1|PTPRJ|SH2B3|HIPK3|NUP62|DUSP16|SPRY4	-1.5
GO Biological Processes	GO:0034405	response to fluid shear stress	-3.5	ABCA1|NFE2L2|NOS3|PKD1|SREBF2|KLF4|MTSS1	-1.5
GO Biological Processes	GO:1901185	negative regulation of ERBB signaling pathway	-3.5	CBL|EGFR|PTPRJ|RAB7A|MVP|NUP62|ERRFI1	-1.5
GO Biological Processes	GO:0032885	regulation of polysaccharide biosynthetic process	-3.5	AP2A1|AKT2|GSK3B|IGF1|INSR|IRS2|SORBS1	-1.5
GO Biological Processes	GO:0035195	miRNA-mediated gene silencing	-3.5	ZFP36|LIMD1|CNOT1|TNRC6B|AGO2|TNRC6C	-1.5
GO Biological Processes	GO:0071276	cellular response to cadmium ion	-3.5	ATP7A|CYBB|EGFR|HMOX1|JUN|MT2A	-1.5
GO Biological Processes	GO:0043242	negative regulation of protein-containing complex disassembly	-3.5	APC|MAP1B|ATXN7|SPTBN1|TRIOBP|CAMSAP2|CLEC16A|CLASP1|TMOD3|SCAF4|TAOK1	-1.5
GO Biological Processes	GO:0048545	response to steroid hormone	-3.5	ATP2B1|ZFP36L1|CYBB|DAB2|FOXO3|GOT1|HMGCS2|IL1RN|JAK2|LOX|MBP|POR|PPARD|SDC1|TGFBR2|ZFP36|NCOA4|ARID1A|NCOA2|ERRFI1|DDIT4|ZMIZ1|CALCOCO1|PAQR7	-1.5
GO Biological Processes	GO:0062197	cellular response to chemical stress	-3.5	ABL1|RHOB|ARNTL|ATP7A|ZFP36L1|DAPK1|EGFR|EPAS1|STX2|FOXO1|FOXO3|HIF1A|HMOX1|JAK2|JUN|MAP3K5|NFE2L2|NOS3|PML|PRKCD|RELB|SIN3A|ERRFI1|SESN2	-1.5
GO Biological Processes	GO:1903706	regulation of hemopoiesis	-3.5	ABL1|ACTB|ACVR1B|ZFP36L1|CSF3R|FOXO3|HIF1A|INPP5D|LOX|LTF|MITF|NF1|NFKBIA|NOTCH2|STAT3|TGFBR2|ZFP36|ARID1A|TRIB1|TOB2|BRPF3|RC3H2|ZMIZ1|ARID1B|RC3H1|NFAM1|ARID2|CCR2	-1.5
GO Biological Processes	GO:0071222	cellular response to lipopolysaccharide	-3.4	ABCA1|ABL1|BCR|CAPN2|CXCL2|HMGCS2|JAK2|NFKBIA|NOS3|PDE4B|PPARD|TNFRSF1B|ZFP36|TNIP1|SBNO2|GIT1	-1.5
GO Biological Processes	GO:0034599	cellular response to oxidative stress	-3.4	ABL1|RHOB|ARNTL|ATP7A|DAPK1|EGFR|EPAS1|STX2|FOXO1|FOXO3|HIF1A|HMOX1|JAK2|JUN|MAP3K5|NFE2L2|NOS3|PML|PRKCD|SIN3A|SESN2	-1.5
GO Biological Processes	GO:0043405	regulation of MAP kinase activity	-3.4	DUSP1|DVL3|EGFR|INSR|MAP3K5|NF1|PRKCD|PTPN1|PTPRJ|TGFA|AXIN1|SH2B3|HIPK3|TRIB1|AKAP13|NUP62|DUSP16|SPRY4	-1.4
GO Biological Processes	GO:1902396	protein localization to bicellular tight junction	-3.4	ACTG1|CDH5|TJP1	-1.4
GO Biological Processes	GO:0031114	regulation of microtubule depolymerization	-3.4	APC|MAP1A|MAP1B|ATXN7|CAMSAP2|CLASP1|TAOK1	-1.4
GO Biological Processes	GO:0045663	positive regulation of myoblast differentiation	-3.4	ACTB|MAP3K5|ARID1A|PLCB1|LRRC8A|ARID1B|ARID2	-1.4
GO Biological Processes	GO:0030511	positive regulation of transforming growth factor beta receptor signaling pathway	-3.4	CREBBP|DAB2|EP300|TGFBR3|AXIN1|ZEB2|HIPK2	-1.4
GO Biological Processes	GO:1903846	positive regulation of cellular response to transforming growth factor beta stimulus	-3.4	CREBBP|DAB2|EP300|TGFBR3|AXIN1|ZEB2|HIPK2	-1.4
GO Biological Processes	GO:0007507	heart development	-3.4	GRK2|ZFP36L1|CDKN1A|CRKL|EP300|HIF1A|RBPJ|INSR|JUN|LOX|SMAD1|MEF2A|NF1|NOS3|NOTCH2|PKD1|PPARD|PRKAR1A|PROX1|PSKH1|SRF|TGFBR2|TGFBR3|TNFRSF1A|TNFRSF1B|VCAM1|WNT2|MICAL2|AKAP13|NCOA6|TAB2|PLCE1|BCOR|SMG9|ADAMTS9|ZMIZ1|SENP2|PLXNA4|ARID2	-1.4
GO Biological Processes	GO:0034248	regulation of cellular amide metabolic process	-3.4	AKT2|ZFP36L1|DAPK1|EEF2|EIF5A|FOXO3|IGF1|NFE2L2|PER1|PRKCD|RPS6KA3|SP1|TPR|ZFP36|BTG2|PUM1|SECISBP2L|TOB1|CNOT1|TNRC6B|PPP1R15A|PLXNB2|PABPC1|AGO2|RC3H2|SAMD4B|DCP1A|TNRC6C|CPEB4|SESN2|RC3H1|PATL1|YTHDF3|MEX3D	-1.4
GO Biological Processes	GO:0002573	myeloid leukocyte differentiation	-3.4	ATP6AP1|CSF1R|RBPJ|JUN|LBR|MITF|MYH9|NOTCH2|RELB|TGFBR2|GAB2|UBD|SBNO2	-1.4
GO Biological Processes	GO:0030879	mammary gland development	-3.4	AKT2|ATP7A|CSF1R|ARHGAP35|HIF1A|JAK2|PML|TGFA|TGFBR2|WNT2|IRS2|NTN1|NCOR2|GPAT4	-1.4
GO Biological Processes	GO:0010962	regulation of glucan biosynthetic process	-3.4	AKT2|GSK3B|IGF1|INSR|IRS2|SORBS1	-1.4
GO Biological Processes	GO:0005979	regulation of glycogen biosynthetic process	-3.4	AKT2|GSK3B|IGF1|INSR|IRS2|SORBS1	-1.4
GO Biological Processes	GO:0090092	regulation of transmembrane receptor protein serine/threonine kinase signaling pathway	-3.4	ABL1|ACVR1B|CDH5|CREBBP|DAB2|EP300|RBPJ|JAK2|LOX|LRP1|NOTCH2|NUMA1|SKI|TGFBR2|TGFBR3|AXIN1|ZEB2|TOB1|FST|SIN3A|HIPK2|SAP130|BCL9L|RBPMS2	-1.4
GO Biological Processes	GO:0048872	homeostasis of number of cells	-3.3	ABL1|ADAR|BCR|EPAS1|HIF1A|HMOX1|JAK2|NOS3|PDE4B|SRF|TGFBR3|BAP1|UBAP2L|PTBP3|SH2B3|FLVCR1|HIPK2|TMOD3|RC3H2|RC3H1|CCR2	-1.4
GO Biological Processes	GO:0071396	cellular response to lipid	-3.3	ABCA1|ABL1|ATP2B1|BCR|ZFP36L1|CAPN2|DAG1|EGFR|FOXO3|CXCL2|GSK3B|HMGCS2|JAK2|MSN|NFKBIA|NOS3|PDE4B|ABCB4|PPARD|RORA|TNFRSF1B|WNT2|ZFP36|NCOA4|ARID1A|TNIP1|SBNO2|PLCB1|GIT1|ERRFI1|DDIT4|ZMIZ1|CALCOCO1|PAQR7	-1.4
GO Biological Processes	GO:0050728	negative regulation of inflammatory response	-3.3	BCR|CDH5|CYLD|FGR|IGF1|PPARD|PRKCD|RORA|TNFRSF1A|TNFRSF1B|ZFP36|SOCS3|KLF4|GIT1|ASH1L	-1.4
GO Biological Processes	GO:0002262	myeloid cell homeostasis	-3.3	ADAR|EPAS1|HMOX1|JAK2|PDE4B|SRF|TGFBR3|BAP1|PTBP3|SH2B3|FLVCR1|HIPK2|TMOD3|CCR2	-1.4
GO Biological Processes	GO:0060396	growth hormone receptor signaling pathway	-3.3	JAK1|JAK2|PTPN1|STAT3|TYK2	-1.4
GO Biological Processes	GO:0010888	negative regulation of lipid storage	-3.3	ABCA1|NFKBIA|PPARD|PNPLA2|TTC39B	-1.4
GO Biological Processes	GO:1903140	regulation of establishment of endothelial barrier	-3.3	CDH5|TNFRSF1A|VCL|S1PR2|PLCB1	-1.4
GO Biological Processes	GO:0043011	myeloid dendritic cell differentiation	-3.3	RBPJ|NOTCH2|RELB|TGFBR2|UBD	-1.4
GO Biological Processes	GO:1901550	regulation of endothelial cell development	-3.3	CDH5|TNFRSF1A|VCL|S1PR2|PLCB1	-1.4
GO Biological Processes	GO:0043009	chordate embryonic development	-3.3	ABL1|ACVR1B|ATP7A|ZFP36L1|CAPN2|DVL3|EGFR|EP300|EPAS1|ARHGAP35|HIF1A|RBPJ|ND4|MYH9|NF1|NOS3|NOTCH2|PKD1|PROX1|SDC4|SKI|SRF|SUPT6H|TGFBR2|WNT2|ZFAND5|AXIN1|ZPR1|SOCS3|CNOT1|PLXNB2|SIN3A|SLC39A1|FLVCR1|BCOR|SULF2|SMG9|OTUD7B|ZMIZ1|CHD8|SENP2|CMIP|ZNF358	-1.4
GO Biological Processes	GO:0071364	cellular response to epidermal growth factor stimulus	-3.3	ZFP36L1|DAB2|EGFR|ZFP36|IQGAP1|ZPR1|ERRFI1|GAREM1	-1.4
GO Biological Processes	GO:0006110	regulation of glycolytic process	-3.3	EP300|HIF1A|IGF1|INSR|STAT3|HDAC4|GIT1|DDIT4	-1.4
GO Biological Processes	GO:0050865	regulation of cell activation	-3.3	ABL1|ACTB|BCR|ZFP36L1|CDKN1A|FGR|FOXO3|FLOT2|HMOX1|IGF1|IL6ST|INPP5D|JAK2|NOS3|PRKAR1A|PRKCD|RORA|SDC4|SLC7A1|SUPT6H|TGFBR2|TNFRSF1B|TYK2|VCAM1|ARID1A|IRS2|GAB2|SH2B3|PAXIP1|IGHV1-18|KMT5B|RC3H2|PELI1|ZMIZ1|ARID1B|RC3H1|NFAM1|ARID2|CCR2	-1.4
GO Biological Processes	GO:0051249	regulation of lymphocyte activation	-3.3	ABL1|ACTB|ZFP36L1|CDKN1A|FGR|FOXO3|FLOT2|IGF1|IL6ST|INPP5D|JAK2|PRKAR1A|SDC4|SLC7A1|SUPT6H|TGFBR2|TNFRSF1B|TYK2|VCAM1|ARID1A|IRS2|PAXIP1|IGHV1-18|KMT5B|RC3H2|PELI1|ZMIZ1|ARID1B|RC3H1|NFAM1|ARID2|CCR2	-1.4
GO Biological Processes	GO:0034115	negative regulation of heterotypic cell-cell adhesion	-3.3	IL1RN|MBP|KLF4|WNK1	-1.4
GO Biological Processes	GO:0046886	positive regulation of hormone biosynthetic process	-3.3	DAB2|EGR1|HIF1A|POR	-1.4
GO Biological Processes	GO:0070587	regulation of cell-cell adhesion involved in gastrulation	-3.3	IL1RN|MBP|KLF4|WNK1	-1.4
GO Biological Processes	GO:0071456	cellular response to hypoxia	-3.3	ATP7A|ZFP36L1|CYBB|EGR1|EPAS1|FOXO3|HIF1A|HMOX1|RBPJ|NFE2L2|PPARD|RORA|HIPK2|EGLN3	-1.4
GO Biological Processes	GO:0060249	anatomical structure homeostasis	-3.3	ACTB|ACTG1|ATP2B1|CDH5|TPP1|EPAS1|HIF1A|LAMC1|LOX|LTF|MAP1A|MBP|NOS3|SRF|TJP1|VCL|RAB7A|TJP2|NKIRAS2|TAOK1|TP53INP2|CCR2	-1.4
GO Biological Processes	GO:0008630	intrinsic apoptotic signaling pathway in response to DNA damage	-3.3	ABL1|CDKN1A|EP300|HMOX1|PML|TNFRSF1A|TNFRSF1B|HIPK2|DDIT4|HIPK1	-1.4
GO Biological Processes	GO:0071216	cellular response to biotic stimulus	-3.3	ABCA1|ABL1|BCR|CAPN2|CXCL2|GSK3B|HMGCS2|JAK2|NFKBIA|NOS3|NOTCH2|PDE4B|PPARD|TNFRSF1B|ZFP36|TNIP1|SBNO2|GIT1	-1.4
GO Biological Processes	GO:0007623	circadian rhythm	-3.3	ARNTL|ZFHX3|EGR1|EP300|GSK3B|NPAS2|PER1|PML|PROX1|RELB|RORA|TOP1|CLOCK|HUWE1|NCOA2	-1.4
GO Biological Processes	GO:0007346	regulation of mitotic cell cycle	-3.3	ABL1|ACTB|APC|ZFP36L1|CDKN1A|FOXN3|CYLD|DUSP1|EGFR|EREG|IGF1|INSR|PKD1|PML|PPP1R10|TGFA|TPR|BTG2|ARID1A|IQGAP1|BCL7B|KLF4|UBD|PLCB1|USP22|BRD4|NUP62|SIN3A|ANKRD17|TMOD3|WAC|INO80|ARID1B|TAOK1|SENP2|ARID2	-1.4
GO Biological Processes	GO:0001525	angiogenesis	-3.3	ACTG1|APOD|RHOB|DAG1|EPAS1|EREG|HIF1A|HMOX1|NR4A1|RBPJ|JUN|LEPR|MYH9|NOS3|NOTCH2|RORA|SHB|SRF|TGFA|TGFBR2|TNFAIP2|YWHAZ|WASF2|CEMIP2|ANGPTL4|C1GALT1|PANK2	-1.4
GO Biological Processes	GO:0001933	negative regulation of protein phosphorylation	-3.3	ABL1|ADAR|APC|CBL|CDKN1A|CRKL|DUSP1|DUSP6|JUN|LRP1|NF1|PRKAR1A|PRKCD|PTPN1|PTPRJ|SOCS3|MVP|SH2B3|HIPK3|TRIB1|ATG14|INPP5F|NUP62|ERRFI1|DDIT4|DUSP16|SPRY4	-1.4
GO Biological Processes	GO:0071219	cellular response to molecule of bacterial origin	-3.2	ABCA1|ABL1|BCR|CAPN2|CXCL2|HMGCS2|JAK2|NFKBIA|NOS3|PDE4B|PPARD|TNFRSF1B|ZFP36|TNIP1|SBNO2|GIT1	-1.4
GO Biological Processes	GO:0032869	cellular response to insulin stimulus	-3.2	AKT2|APC|ZFP36L1|FOXO1|GOT1|GSK3B|HMGCS2|IGFBP1|INSR|PTPN1|SP1|IRS2|SORBS1|SLC39A14|ERRFI1|LPIN3	-1.4
GO Biological Processes	GO:0000288	nuclear-transcribed mRNA catabolic process, deadenylation-dependent decay	-3.2	ZFP36L1|ZFP36|CNOT1|RC3H2|SAMD4B|DCP1A|RC3H1|PATL1	-1.4
GO Biological Processes	GO:0010883	regulation of lipid storage	-3.2	ABCA1|PLIN2|NFKBIA|PPARD|SREBF2|PNPLA2|TTC39B|PLIN5	-1.4
GO Biological Processes	GO:0002694	regulation of leukocyte activation	-3.2	ABL1|ACTB|BCR|ZFP36L1|CDKN1A|FGR|FOXO3|FLOT2|HMOX1|IGF1|IL6ST|INPP5D|JAK2|PRKAR1A|RORA|SDC4|SLC7A1|SUPT6H|TGFBR2|TNFRSF1B|TYK2|VCAM1|ARID1A|IRS2|GAB2|PAXIP1|IGHV1-18|KMT5B|RC3H2|PELI1|ZMIZ1|ARID1B|RC3H1|NFAM1|ARID2|CCR2	-1.3
GO Biological Processes	GO:0006417	regulation of translation	-3.2	AKT2|ZFP36L1|DAPK1|EEF2|EIF5A|FOXO3|PER1|RPS6KA3|TPR|ZFP36|BTG2|PUM1|SECISBP2L|TOB1|CNOT1|TNRC6B|PPP1R15A|PLXNB2|PABPC1|AGO2|RC3H2|SAMD4B|DCP1A|TNRC6C|CPEB4|SESN2|RC3H1|PATL1|YTHDF3|MEX3D	-1.3
GO Biological Processes	GO:0072331	signal transduction by p53 class mediator	-3.2	CDKN1A|EP300|FOXO3|PML|PPM1D|PAXIP1|HIPK2|DDIT4|SESN2|HIPK1|ACER2	-1.3
GO Biological Processes	GO:0033673	negative regulation of kinase activity	-3.2	ABL1|ADAR|APC|CBL|CDKN1A|DUSP1|NF1|PRKAR1A|PRKCD|PTPN1|PTPRJ|IRS2|MVP|SH2B3|HIPK3|TRIB1|NUP62|ERRFI1|DUSP16|SPRY4|MIDN	-1.3
GO Biological Processes	GO:0051056	regulation of small GTPase mediated signal transduction	-3.2	ABCA1|ABL1|ARHGAP1|BCR|CBL|ARHGAP35|IGF1|MYO9B|NF1|NOTCH2|RGL2|TNFAIP1|ARHGAP29|MAP4K4|DENND4A|AKAP13|PSD3|NUP62|PLCE1|RALGAPB|PLEKHG1|PREX1|DENND1A|EPS8L2|SPRY4|KCTD10	-1.3
GO Biological Processes	GO:0006338	chromatin remodeling	-3.2	ACTB|CHD4|HMGA1|SUPT6H|TOP1|ARID1A|SMARCA5|BCL7B|HDAC4|SRCAP|RAD54L2|BRD4|INO80|GATAD2A|YEATS2|GATAD2B|ARID1B|CHD8|MIER1|TADA2B|ARID2	-1.3
GO Biological Processes	GO:0048499	synaptic vesicle membrane organization	-3.2	STX2|SNAP25|STX11|SNAP23|STX1B	-1.3
GO Biological Processes	GO:0071378	cellular response to growth hormone stimulus	-3.2	JAK1|JAK2|PTPN1|STAT3|TYK2	-1.3
GO Biological Processes	GO:0042149	cellular response to glucose starvation	-3.2	PLIN2|FOXO3|NFE2L2|ATG14|SIK2|PRKAG3|CPEB4|SESN2|SESN3	-1.3
GO Biological Processes	GO:0031400	negative regulation of protein modification process	-3.2	ABL1|ADAR|APC|CBL|CDKN1A|CRKL|DUSP1|DUSP6|GSK3B|JUN|LRP1|NF1|PRKAR1A|PRKCD|PTPN1|PTPRJ|SKI|SUPT6H|SOCS3|CDYL|MVP|SH2B3|HIPK3|TRIB1|ATG14|INPP5F|NUP62|PPP1R15A|SIN3A|ERRFI1|DDIT4|BCOR|SENP2|DUSP16|SPRY4|BOD1L1|ACER2	-1.3
GO Biological Processes	GO:0046916	cellular transition metal ion homeostasis	-3.1	ATP6AP1|ATP7A|SLC31A2|HIF1A|HMOX1|MT2A|TFR2|NCOA4|SLC39A14|FLVCR1|STEAP4|SLC30A7	-1.3
GO Biological Processes	GO:0000165	MAPK cascade	-3.1	ZFP36L1|CRKL|DUSP5|DUSP6|EGFR|IGF1|SMAD1|MBP|MEF2A|MAP3K5|NF1|YWHAZ|ZFP36|MAPKAPK2|MAP4K4|RAPGEF2|TRIB1|TAOK1	-1.3
GO Biological Processes	GO:0006468	protein phosphorylation	-3.1	ABL1|ACVR1B|GRK2|AKT2|BCR|CSF1R|CSF2RA|DAPK1|EGFR|FGR|GSK3B|INSR|JAK1|JAK2|SMAD1|MAP3K5|PKD1|PML|PRKCD|PSKH1|RPS6KA3|ST3GAL1|SPTBN1|STK10|TGFBR2|TGFBR3|TOP1|TYK2|YWHAZ|SMARCA5|PPM1D|MAPKAPK2|MAP4K4|HIPK3|AKAP13|ATG14|ERC1|SIK2|SIK3|BRD4|HIPK2|PRKAG3|TAOK1|WNK1|PEAK1|STK40|HIPK1|MAST4	-1.3
GO Biological Processes	GO:0055076	transition metal ion homeostasis	-3.1	ATP6AP1|ATP7A|SLC31A2|EPAS1|HIF1A|HMOX1|LTF|MT2A|TFR2|NCOA4|SLC39A14|FLVCR1|STEAP4|SLC30A7	-1.3
GO Biological Processes	GO:0010828	positive regulation of glucose transmembrane transport	-3.1	AKT2|IGF1|INSR|MEF2A|NFE2L2|IRS2|SORBS1	-1.3
GO Biological Processes	GO:0022407	regulation of cell-cell adhesion	-3.1	ABL1|ACTB|ANK3|FOXO3|FLOT2|IGF1|IL1RN|IL6ST|JAK1|JAK2|MBP|PRKAR1A|PRKCD|SDC4|SLC7A1|TGFBR2|TJP1|TYK2|VCAM1|ARID1A|KLF4|SH2B3|PTPN23|RC3H2|PELI1|ZMIZ1|ARID1B|WNK1|RC3H1|ARID2|CCR2	-1.3
GO Biological Processes	GO:0051348	negative regulation of transferase activity	-3.1	ABL1|ADAR|APC|CBL|CDKN1A|DUSP1|GSK3B|NF1|PRKAR1A|PRKCD|PTPN1|PTPRJ|ZFP36|IRS2|MVP|SH2B3|HIPK3|TRIB1|NUP62|ERRFI1|DUSP16|SPRY4|MIDN	-1.3
GO Biological Processes	GO:0051347	positive regulation of transferase activity	-3.1	ABL1|CDKN1A|CSF1R|DAG1|DVL3|EGFR|EGR1|EREG|FGR|IGF1|INSR|JAK2|LTF|MAP3K5|NEDD9|PKD1|PRKCD|PROX1|PTPN1|RANBP2|PLAAT4|SDC4|TGFA|TGFBR2|AXIN1|IQGAP1|KLF4|TRAF4|RAPGEF2|DAZAP2|AKAP13|ATG14|TAB2|TAOK1|WNK1|HMBOX1|ZFP91|MOB3A|CCNYL1	-1.3
GO Biological Processes	GO:0031047	gene silencing by RNA	-3.1	ADAR|SMAD1|ZFP36|LIMD1|PUM1|CNOT1|TNRC6B|PABPC1|AGO2|TNRC6C|TDRD12	-1.3
GO Biological Processes	GO:1900024	regulation of substrate adhesion-dependent cell spreading	-3.1	ABL1|ACTN4|CRKL|DAB2|NEDD9|RREB1|TRIOBP|PREX1|SPRY4	-1.3
GO Biological Processes	GO:0043123	positive regulation of I-kappaB kinase/NF-kappaB signaling	-3.1	ABL1|HMOX1|LTF|REL|S100B|TNFRSF1A|UBD|AKAP13|TAB2|BRD4|NUP62|ANKRD17|ATP2C1|CC2D1A|PELI1|MIER1|TMEM101	-1.2
GO Biological Processes	GO:0042770	signal transduction in response to DNA damage	-3.1	ABL1|CDKN1A|FOXN3|FOXO3|PML|PPM1D|CLOCK|PAXIP1|HIPK2|WAC|TAOK1|SESN2|DOT1L|ACER2	-1.2
GO Biological Processes	GO:0035278	miRNA-mediated gene silencing by inhibition of translation	-3.1	ZFP36|TNRC6B|AGO2|TNRC6C	-1.2
GO Biological Processes	GO:0045815	epigenetic maintenance of chromatin in transcription-competent conformation	-3.1	EP300|PHF2|ARID1A|ARID1B	-1.2
GO Biological Processes	GO:0034112	positive regulation of homotypic cell-cell adhesion	-3.1	ANK3|IL6ST|JAK1|JAK2	-1.2
GO Biological Processes	GO:2000045	regulation of G1/S transition of mitotic cell cycle	-3.1	ACTB|APC|CDKN1A|EGFR|PKD1|PML|ARID1A|BCL7B|KLF4|PLCB1|ANKRD17|WAC|INO80|ARID1B|SENP2|ARID2	-1.2
GO Biological Processes	GO:1903829	positive regulation of protein localization	-3.1	AKT2|ANK3|APC|EGFR|EPB41|GSK3B|HIF1A|IGF1|JAK2|LRP1|MAP1A|MSN|MYH10|MYO1C|NUMA1|PPARD|PRKCD|SPTBN1|SREBF2|TPR|BAP1|IRS2|ZPR1|HUWE1|ARIH2|SORBS1|NUP62|ZDHHC5|PTPN23|ATP2C1|TRAPPC12|LRRC8A|SESN2	-1.2
GO Biological Processes	GO:0007179	transforming growth factor beta receptor signaling pathway	-3.1	CDH5|JUN|SMAD1|PML|SKI|STAT3|TGFBR2|TGFBR3|ZYX|HIPK2|ZMIZ1	-1.2
GO Biological Processes	GO:0046649	lymphocyte activation	-3.1	ABL1|ATP7A|ZFP36L1|KLF6|EGR1|ELF4|EP300|RBPJ|LEPR|MSN|MYH9|NOTCH2|PRKCD|PTPRJ|RELB|RORA|ST3GAL1|SRF|STAT3|VCAM1|HDAC4|KIF13B|RC3H2|LRRC8A|PREX1|WDFY4|RC3H1|NFAM1	-1.2
GO Biological Processes	GO:0016575	histone deacetylation	-3	CHD4|PER1|TBL1X|HDAC4|SIN3A|GATAD2A|GATAD2B|MIER1|MIDEAS	-1.2
GO Biological Processes	GO:0043467	regulation of generation of precursor metabolites and energy	-3	AKT2|ATP7A|EP300|GSK3B|HIF1A|IFNAR1|IGF1|INSR|STAT3|IRS2|HDAC4|SORBS1|GIT1|DDIT4	-1.2
GO Biological Processes	GO:0033194	response to hydroperoxide	-3	DAPK1|GPX3|JAK2|PRKCD|SP1	-1.2
GO Biological Processes	GO:1903672	positive regulation of sprouting angiogenesis	-3	JAK1|SMAD1|TJP1|KLF4|JCAD	-1.2
GO Biological Processes	GO:0060416	response to growth hormone	-3	HMGCS2|JAK1|JAK2|PTPN1|STAT3|TYK2	-1.2
GO Biological Processes	GO:0002294	CD4-positive, alpha-beta T cell differentiation involved in immune response	-3	ATP7A|RELB|RORA|STAT3|RC3H2|RC3H1	-1.2
GO Biological Processes	GO:0042093	T-helper cell differentiation	-3	ATP7A|RELB|RORA|STAT3|RC3H2|RC3H1	-1.2
GO Biological Processes	GO:0007162	negative regulation of cell adhesion	-3	ABL1|ACTN4|APOD|DUSP1|IL1RN|JAK2|MBP|NF1|PRKAR1A|PRKCD|SDC4|KLF4|MAP4K4|SH2B3|PLXNB2|RC3H2|PELI1|SEMA6A|WNK1|SPRY4|PLXNA4|RC3H1|ACER2	-1.2
GO Biological Processes	GO:1900368	regulation of post-transcriptional gene silencing by RNA	-3	ADAR|EGFR|STAT3|ZFP36|LIMD1|NCOR2|PUM1	-1.2
GO Biological Processes	GO:0000041	transition metal ion transport	-3	ARHGAP1|ATP7A|SLC31A2|LTF|TFR2|SLC39A14|ATP2C1|SLC39A1|FLVCR1|ATP13A1|STEAP4|SLC30A7	-1.2
GO Biological Processes	GO:0060059	embryonic retina morphogenesis in camera-type eye	-3	PROX1|HIPK2|HIPK1	-1.2
GO Biological Processes	GO:0048638	regulation of developmental growth	-3	ABL1|CDKN1A|DUSP6|GSK3B|IGF1|RBPJ|INSR|MAP1B|PPARD|PROX1|SRF|STAT3|TGFBR2|TGFBR3|WNT2|SGPL1|NTN1|SLC23A2|PLCB1|SIN3A|FLVCR1|WWC3|SEMA6A|DIP2B|PLXNA4|GPAT4	-1.2
GO Biological Processes	GO:0051169	nuclear transport	-3	CDKN1A|EGR2|NFKBIA|NUP98|PKD1|PML|PPP1R10|RANBP2|STAT3|TPR|AXIN1|SMG7|NUP153|AKAP13|XPO6|NUP62|THOC6|DUSP16|THOC3|POM121C	-1.2
GO Biological Processes	GO:0006913	nucleocytoplasmic transport	-3	CDKN1A|EGR2|NFKBIA|NUP98|PKD1|PML|PPP1R10|RANBP2|STAT3|TPR|AXIN1|SMG7|NUP153|AKAP13|XPO6|NUP62|THOC6|DUSP16|THOC3|POM121C	-1.2
GO Biological Processes	GO:0060537	muscle tissue development	-3	ATF3|BCL9|EGR1|EGR2|EP300|NR4A1|RBPJ|SMAD1|MEF2A|NF1|NOTCH2|PRKAR1A|PROX1|SKI|SRF|TGFBR3|WNT2|ZFAND5|BTG2|AKAP13|ADAMTS9|MYH14|ZNF689|ARID2	-1.2
GO Biological Processes	GO:0060966	regulation of gene silencing by RNA	-3	ADAR|EGFR|STAT3|ZFP36|LIMD1|NCOR2|PUM1	-1.2
GO Biological Processes	GO:0060147	regulation of post-transcriptional gene silencing	-3	ADAR|EGFR|STAT3|ZFP36|LIMD1|NCOR2|PUM1	-1.2
GO Biological Processes	GO:0032881	regulation of polysaccharide metabolic process	-3	AP2A1|AKT2|GSK3B|IGF1|INSR|IRS2|SORBS1	-1.2
GO Biological Processes	GO:0006469	negative regulation of protein kinase activity	-2.9	ABL1|ADAR|APC|CBL|CDKN1A|DUSP1|NF1|PRKAR1A|PRKCD|PTPN1|PTPRJ|MVP|SH2B3|HIPK3|TRIB1|NUP62|ERRFI1|DUSP16|SPRY4	-1.2
GO Biological Processes	GO:0002293	alpha-beta T cell differentiation involved in immune response	-2.9	ATP7A|RELB|RORA|STAT3|RC3H2|RC3H1	-1.2
GO Biological Processes	GO:0002287	alpha-beta T cell activation involved in immune response	-2.9	ATP7A|RELB|RORA|STAT3|RC3H2|RC3H1	-1.2
GO Biological Processes	GO:0007026	negative regulation of microtubule depolymerization	-2.9	APC|MAP1B|ATXN7|CAMSAP2|CLASP1|TAOK1	-1.2
GO Biological Processes	GO:0051168	nuclear export	-2.9	EGR2|PKD1|RANBP2|TPR|SMG7|NUP153|AKAP13|XPO6|NUP62|THOC6|DUSP16|THOC3|POM121C	-1.1
GO Biological Processes	GO:0046631	alpha-beta T cell activation	-2.9	ABL1|ATP7A|ELF4|RELB|RORA|STAT3|RC3H2|WDFY4|RC3H1	-1.1
GO Biological Processes	GO:0000956	nuclear-transcribed mRNA catabolic process	-2.9	ZFP36L1|ZFP36|SMG7|CNOT1|PABPC1|RC3H2|SAMD4B|DCP1A|SMG9|HELZ2|RC3H1|PATL1	-1.1
GO Biological Processes	GO:1901987	regulation of cell cycle phase transition	-2.9	ACTB|APC|ZFP36L1|CDKN1A|FOXN3|DUSP1|EGFR|PKD1|PML|PPP1R10|PROX1|TPR|ARID1A|BCL7B|KLF4|CLOCK|UBD|PAXIP1|PLCB1|BRD4|SIN3A|ANKRD17|TMOD3|WAC|INO80|SUSD2|ARID1B|TAOK1|SENP2|DOT1L|ARID2	-1.1
GO Biological Processes	GO:0034612	response to tumor necrosis factor	-2.9	ACTN4|ZFP36L1|EIF5A|FOXO3|JAK2|MBP|MAP3K5|NFE2L2|NFKBIA|RORA|TNFRSF1A|TNFRSF1B|VCAM1|ZFP36|UBD|CXCL16	-1.1
GO Biological Processes	GO:0051100	negative regulation of binding	-2.9	ACTB|CDKN1A|DAB2|GSK3B|HMOX1|JAK2|JUN|NFKBIA|PRKCD|PTPRF|SYMPK|WAPL|SIN3A|SENP2|ILRUN	-1.1
GO Biological Processes	GO:0035914	skeletal muscle cell differentiation	-2.9	ATF3|BCL9|EGR1|EGR2|NR4A1|BTG2|ZNF689	-1.1
GO Biological Processes	GO:0090257	regulation of muscle system process	-2.9	GRK2|ATP2B1|CHRM2|DAG1|FOXO1|FOXO3|NR4A1|IGF1|IL6ST|MEF2A|NOS3|PDE4B|SRF|TNFRSF1A|TNFRSF1B|HDAC4|CTNNA3|PLCE1|PRKAG3|ERRFI1	-1.1
GO Biological Processes	GO:0006476	protein deacetylation	-2.9	CHD4|PER1|TBL1X|HDAC4|SIN3A|GATAD2A|GATAD2B|MIER1|MIDEAS	-1.1
GO Biological Processes	GO:1900076	regulation of cellular response to insulin stimulus	-2.9	ATP2B1|MYO1C|PRKCD|PTPN1|PTPRE|SOCS3|NCOA2|SORBS1|SERPINA12	-1.1
GO Biological Processes	GO:1902806	regulation of cell cycle G1/S phase transition	-2.9	ACTB|APC|CDKN1A|EGFR|PKD1|PML|ARID1A|BCL7B|KLF4|PLCB1|ANKRD17|WAC|INO80|SUSD2|ARID1B|SENP2|ARID2	-1.1
GO Biological Processes	GO:0044089	positive regulation of cellular component biogenesis	-2.8	ABCA1|ABL1|APC|ATP7A|CDH5|DAG1|ARHGAP35|GSK3B|HTT|MAP1B|MSN|NUMA1|PTPRJ|SDC1|SDC4|SRF|TPR|RAB7A|STAM|MAP4K4|MTSS1|PLEKHM1|WASF2|CNOT1|ATG2A|CLASP1|NUP62|SIN3A|GIT1|PLCE1|NIN|ATF7IP|DHX33|EPS8L2|AMIGO2	-1.1
GO Biological Processes	GO:1901184	regulation of ERBB signaling pathway	-2.8	CBL|EGFR|EREG|RBPJ|PTPRJ|TGFA|RAB7A|MVP|NUP62|ERRFI1	-1.1
GO Biological Processes	GO:0050679	positive regulation of epithelial cell proliferation	-2.8	ATP7A|EGFR|HIF1A|HMOX1|NR4A1|IGF1|JUN|LAMC1|NF1|NOTCH2|PROX1|RREB1|SP1|STAT3|TGFA|WNT2|JCAD	-1.1
GO Biological Processes	GO:1901879	regulation of protein depolymerization	-2.8	APC|MAP1A|MAP1B|ATXN7|SPTBN1|WDR1|TRIOBP|CAMSAP2|CLASP1|TMOD3|TAOK1	-1.1
GO Biological Processes	GO:0007420	brain development	-2.8	ABL1|ACTB|APOD|ZFHX3|ATP2B1|ATP7A|BCR|CRKL|CSF1R|EGFR|EGR2|FOXO3|ARHGAP35|GSK3B|HIF1A|HMGCS2|RBPJ|SMAD1|MBP|ND4|NF1|PAFAH1B2|PROX1|RORA|SELENOP|SKI|SRF|TGFBR2|WNT2|BTG2|IRS2|NAPA|RAPGEF2|FAIM2|NCOA6|CIC|PLCB1|PLXNB2|SIN3A|GIT1|NIN|SLC38A2|DDIT4|SOX6|SMG9|ZMIZ1|CHD8|PLXNA4|AMIGO2	-1.1
GO Biological Processes	GO:0042509	regulation of tyrosine phosphorylation of STAT protein	-2.8	CSF1R|IGF1|IL6ST|JAK2|TNFRSF1A|SOCS3|SH2B3|INPP5F	-1.1
GO Biological Processes	GO:0070373	negative regulation of ERK1 and ERK2 cascade	-2.8	ABL1|ATF3|DAB2|DUSP6|PTPN1|TNIP1|ERRFI1|SEMA6A|SPRY4	-1.1
GO Biological Processes	GO:1900744	regulation of p38MAPK cascade	-2.8	CYLD|DUSP1|MAP3K5|PER1|GADD45G|PHLPP1|RELL1	-1.1
GO Biological Processes	GO:0043114	regulation of vascular permeability	-2.8	BCR|CDH5|ARHGAP35|PTPRJ|TJP1|TJP2|C2CD4A	-1.1
GO Biological Processes	GO:1900026	positive regulation of substrate adhesion-dependent cell spreading	-2.8	ABL1|CRKL|DAB2|NEDD9|RREB1|TRIOBP|PREX1	-1.1
GO Biological Processes	GO:0002089	lens morphogenesis in camera-type eye	-2.8	PROX1|SKI|HIPK2|TBC1D20|HIPK1	-1.1
GO Biological Processes	GO:0001773	myeloid dendritic cell activation	-2.8	RBPJ|NOTCH2|RELB|TGFBR2|UBD	-1.1
GO Biological Processes	GO:0003177	pulmonary valve development	-2.8	RBPJ|NOS3|NOTCH2|TNFRSF1A|TNFRSF1B	-1.1
GO Biological Processes	GO:0097191	extrinsic apoptotic signaling pathway	-2.8	ACVR1B|DAPK1|FOXO3|GSK3B|JAK2|NF1|PML|TNFRSF1A|TNFRSF1B|HIPK1	-1
GO Biological Processes	GO:0010506	regulation of autophagy	-2.8	ABL1|ATP6V0A1|DAPK1|EP300|FOXO1|FOXO3|GSK3B|HTT|HIF1A|HMOX1|FOXK2|LEPR|PAFAH1B2|CTSA|SREBF2|STAT3|DEPP1|ATG14|TAB2|ATG2A|CLEC16A|WAC|TP53INP2|SESN2|SESN3|ACER2	-1
GO Biological Processes	GO:0046328	regulation of JNK cascade	-2.8	CYLD|EGFR|MAP3K5|PER1|AXIN1|MAP4K4|TRAF4|HIPK3|GADD45G|PLCB1|PHLPP1|HIPK2|TAOK1|DUSP16	-1
GO Biological Processes	GO:0030183	B cell differentiation	-2.8	ABL1|KLF6|EP300|RBPJ|NOTCH2|PTPRJ|ST3GAL1|VCAM1|HDAC4|LRRC8A|NFAM1	-1
GO Biological Processes	GO:0000302	response to reactive oxygen species	-2.8	ABL1|APOD|RHOB|ATP7A|CAPN2|CYP2E1|EGFR|HIF1A|HMOX1|JUN|MAP3K5|ND6|NFE2L2|NOS3|PRKCD|SDC1	-1
GO Biological Processes	GO:0007015	actin filament organization	-2.8	ABL1|RHOB|RND3|JAK2|MYO1C|MYO1D|NEDD9|PROX1|SRF|TNFAIP1|TPM4|ZYX|GAS7|MICAL2|ELMO1|WDR1|SORBS1|TRIOBP|CTNNA3|TMOD3|PREX1|RFLNB	-1
GO Biological Processes	GO:0009611	response to wounding	-2.8	ACTB|ACTG1|APOD|ZFP36L1|SERPING1|CDKN1A|DAG1|EREG|F12|F13A1|ARHGAP35|HIF1A|HMOX1|IGF1|JAK2|JUN|LOX|MAP1B|MAP3K5|MYH9|NF1|NOTCH2|PPARD|SDC1|SDC4|SRF|TGFA|TGFBR2|VCL|ZFP36|CCR2	-1
GO Biological Processes	GO:0070873	regulation of glycogen metabolic process	-2.8	AKT2|GSK3B|IGF1|INSR|IRS2|SORBS1	-1
GO Biological Processes	GO:0031102	neuron projection regeneration	-2.8	APOD|DAG1|JAK2|JUN|MAP1B|PTPRF	-1
GO Biological Processes	GO:0034110	regulation of homotypic cell-cell adhesion	-2.8	ANK3|IL6ST|JAK1|JAK2|PRKCD|SH2B3	-1
GO Biological Processes	GO:0042771	intrinsic apoptotic signaling pathway in response to DNA damage by p53 class mediator	-2.8	CDKN1A|EP300|PML|HIPK2|DDIT4|HIPK1	-1
GO Biological Processes	GO:0071385	cellular response to glucocorticoid stimulus	-2.8	ATP2B1|ZFP36L1|FOXO3|HMGCS2|JAK2|ZFP36|ERRFI1|DDIT4	-1
GO Biological Processes	GO:0007517	muscle organ development	-2.8	ZFHX3|ATF3|BCL9|DAG1|EGR1|EGR2|EP300|NR4A1|IGF1|RBPJ|MEF2A|NF1|PROX1|SKI|TGFBR3|WNT2|BTG2|ZNF609|KMT5B|SOX6|MYH14|ZNF689	-1
GO Biological Processes	GO:1902117	positive regulation of organelle assembly	-2.7	ARHGAP35|GSK3B|HTT|MSN|NUMA1|SDC1|SDC4|CNOT1|ATG2A|NUP62	-1
GO Biological Processes	GO:0038066	p38MAPK cascade	-2.7	ZFP36L1|MAP3K5|ZFP36|MAPKAPK2	-1
GO Biological Processes	GO:0060038	cardiac muscle cell proliferation	-2.7	SMAD1|PRKAR1A|TGFBR3|ARID2	-1
GO Biological Processes	GO:0061418	regulation of transcription from RNA polymerase II promoter in response to hypoxia	-2.7	EGR1|HIF1A|RBPJ|NFE2L2	-1
GO Biological Processes	GO:0010761	fibroblast migration	-2.7	PML|ZFAND5|IQGAP1|SGPL1	-1
GO Biological Processes	GO:0034616	response to laminar fluid shear stress	-2.7	ABCA1|NFE2L2|SREBF2|KLF4	-1
GO Biological Processes	GO:0050678	regulation of epithelial cell proliferation	-2.7	ATP7A|ZFP36L1|DAB2|EGFR|EREG|HIF1A|HMOX1|NR4A1|IGF1|JUN|LAMC1|NF1|NOTCH2|PPARD|PROX1|RREB1|SP1|STAT3|TGFA|TGFBR3|WNT2|ZFP36|MTSS1|ERRFI1|JCAD	-1
GO Biological Processes	GO:1905952	regulation of lipid localization	-2.7	ABCA1|PLIN2|AKT2|CYP8B1|DAB2|LRP1|NFKBIA|ABCB4|PPARD|PRKCD|SREBF2|IRS2|PNPLA2|TTC39B|PLIN5	-1
GO Biological Processes	GO:0048729	tissue morphogenesis	-2.7	ABL1|ACTB|ACTG1|RHOB|ATP7A|CSF1R|DAG1|DVL3|EGFR|ARHGAP35|HIF1A|RBPJ|SMAD1|MSN|NOS3|NOTCH2|PKD1|PML|PRKAR1A|PROX1|SDC4|SKI|SRF|TGFBR2|TGFBR3|TXNRD1|VCL|WNT2|AXIN1|SOCS3|KLF4|NTN1|MICAL2|MTSS1|WDR1|FST|PLXNB2	-1
GO Biological Processes	GO:1904781	positive regulation of protein localization to centrosome	-2.7	APC|GSK3B|NUP62	-1
GO Biological Processes	GO:0072575	epithelial cell proliferation involved in liver morphogenesis	-2.7	NOTCH2|PROX1|TGFA	-1
GO Biological Processes	GO:2000323	negative regulation of glucocorticoid receptor signaling pathway	-2.7	ARNTL|PER1|CLOCK	-1
GO Biological Processes	GO:0061419	positive regulation of transcription from RNA polymerase II promoter in response to hypoxia	-2.7	HIF1A|RBPJ|NFE2L2	-1
GO Biological Processes	GO:1903551	regulation of extracellular exosome assembly	-2.7	SDC1|SDC4|STAM	-1
GO Biological Processes	GO:0072574	hepatocyte proliferation	-2.7	NOTCH2|PROX1|TGFA	-1
GO Biological Processes	GO:0048660	regulation of smooth muscle cell proliferation	-2.7	APOD|CDKN1A|EREG|HMOX1|IGF1|JAK2|JUN|MAP3K5|NOS3|PPARD|TGFBR2|S1PR2|TRIB1|RBPMS2	-1
GO Biological Processes	GO:0010811	positive regulation of cell-substrate adhesion	-2.7	ABL1|CRKL|DAB2|DAG1|GSK3B|JAK2|NEDD9|PTPRJ|RREB1|SDC4|MAP4K4|TRIOBP|PREX1	-1
GO Biological Processes	GO:0001952	regulation of cell-matrix adhesion	-2.7	ABL1|ACTG1|APOD|DAG1|GSK3B|NF1|PTPRJ|SDC4|VCL|MAP4K4|CLASP1|PEAK1|ACER2	-1
GO Biological Processes	GO:0044403	biological process involved in symbiotic interaction	-2.7	GRK2|CBL|CSF1R|DAG1|EGFR|EP300|INSR|JAK2|JUN|LTF|SP1|RAB7A|XPR1|NUP153|WWP1|THOC6|THOC3|TBC1D20|RNASEK	-1
GO Biological Processes	GO:0031113	regulation of microtubule polymerization	-2.7	ABL1|CDH5|MAP1B|NUMA1|CAMSAP2|CLASP1|GIT1|NIN	-1
GO Biological Processes	GO:0043470	regulation of carbohydrate catabolic process	-2.7	EP300|HIF1A|IGF1|INSR|STAT3|HDAC4|GIT1|DDIT4	-1
GO Biological Processes	GO:0055017	cardiac muscle tissue growth	-2.7	SMAD1|PRKAR1A|TGFBR3|AKAP13|ARID2	-1
GO Biological Processes	GO:0050650	chondroitin sulfate proteoglycan biosynthetic process	-2.7	CHSY1|DSE|CHST7|CHPF|PXYLP1	-1
GO Biological Processes	GO:1902414	protein localization to cell junction	-2.7	ACTB|ACTG1|CDH5|JAK1|KIF5C|MAP1A|SNAP25|TJP1|TJP2|STX1B	-1
GO Biological Processes	GO:0045637	regulation of myeloid cell differentiation	-2.7	ACVR1B|ZFP36L1|CSF3R|FOXO3|HIF1A|INPP5D|LOX|LTF|MITF|NF1|NFKBIA|NOTCH2|STAT3|ZFP36|TRIB1|TOB2	-1
GO Biological Processes	GO:0001934	positive regulation of protein phosphorylation	-2.7	ABL1|AKT2|CDKN1A|CRKL|CSF1R|DAB2|DAG1|DVL3|EGFR|EGR1|EREG|IGF1|IL6ST|INSR|JAK2|LEPR|LTF|MAP3K5|NEDD9|PKD1|PRKCD|PROX1|PTPN1|PTPRJ|SDC4|TGFA|TGFBR2|TNFRSF1A|AXIN1|IQGAP1|S1PR2|TRAF4|RAPGEF2|DAZAP2|AKAP13|ATG14|TAB2|HIPK2|TAOK1|WNK1|ZFP91|MOB3A|CCNYL1	-1
GO Biological Processes	GO:0002292	T cell differentiation involved in immune response	-2.7	ATP7A|RELB|RORA|STAT3|RC3H2|RC3H1	-0.99
GO Biological Processes	GO:0016441	post-transcriptional gene silencing	-2.7	ZFP36|LIMD1|PUM1|CNOT1|TNRC6B|AGO2|TNRC6C	-0.98
GO Biological Processes	GO:0031111	negative regulation of microtubule polymerization or depolymerization	-2.7	APC|CDH5|MAP1B|ATXN7|CAMSAP2|CLASP1|TAOK1	-0.98
GO Biological Processes	GO:0002764	immune response-regulating signaling pathway	-2.7	ABL1|CREBBP|CRKL|CYLD|EP300|FGR|INPP5D|NFKBIA|PDE4B|PRKCD|PTPRJ|RPS6KA3|MAPKAPK2|TNIP1|IGHV1-18|RC3H2|WNK1|UNC93B1|RC3H1|NFAM1	-0.98
GO Biological Processes	GO:0032872	regulation of stress-activated MAPK cascade	-2.7	CYLD|DUSP1|EGFR|FOXO1|MAP3K5|PER1|AXIN1|MAP4K4|TRAF4|HIPK3|GADD45G|PLCB1|PHLPP1|HIPK2|TAOK1|DUSP16|RELL1	-0.98
GO Biological Processes	GO:1901880	negative regulation of protein depolymerization	-2.7	APC|MAP1B|ATXN7|SPTBN1|TRIOBP|CAMSAP2|CLASP1|TMOD3|TAOK1	-0.98
GO Biological Processes	GO:0006606	protein import into nucleus	-2.7	CDKN1A|NFKBIA|NUP98|PML|PPP1R10|RANBP2|STAT3|TPR|NUP153|NUP62|POM121C	-0.98
GO Biological Processes	GO:1901990	regulation of mitotic cell cycle phase transition	-2.7	ACTB|APC|ZFP36L1|CDKN1A|FOXN3|DUSP1|EGFR|PKD1|PML|TPR|ARID1A|BCL7B|KLF4|UBD|PLCB1|BRD4|SIN3A|ANKRD17|TMOD3|WAC|INO80|ARID1B|TAOK1|SENP2|ARID2	-0.97
GO Biological Processes	GO:0055002	striated muscle cell development	-2.6	ACTG1|MEF2A|PRKAR1A|PROX1|SDC1|SRF|WDR1|TMOD3	-0.97
GO Biological Processes	GO:0051251	positive regulation of lymphocyte activation	-2.6	ACTB|CDKN1A|FOXO3|FLOT2|IGF1|IL6ST|INPP5D|JAK2|SLC7A1|TGFBR2|TYK2|VCAM1|ARID1A|IRS2|PAXIP1|IGHV1-18|KMT5B|PELI1|ZMIZ1|ARID1B|ARID2|CCR2	-0.96
GO Biological Processes	GO:0008360	regulation of cell shape	-2.6	RHOB|RND3|CSF1R|DAG1|EPB41|FGR|ARHGAP35|MSN|MYH9|MYH10|LIMD1|WDR1|PLXNB2|MYH14|PLXNA4	-0.96
GO Biological Processes	GO:0019725	cellular homeostasis	-2.6	ATP2B1|ATP6V0A1|ATP6AP1|ATP7A|CDH5|SLC31A2|FOXO1|FOXO3|HIF1A|HMOX1|FOXK2|LOX|MAP1A|MT2A|NFE2L2|NOS3|PML|SRF|TFR2|TXNRD1|ZNF236|RAB7A|NCOA4|IRS2|XPR1|CHERP|SLC39A14|SIN3A|ATP2C1|GIT1|FLVCR1|LRRC8A|ATP13A1|TAOK1|STEAP4|SLC30A7|SLC41A1|RNASEK|CCR2	-0.95
GO Biological Processes	GO:0006470	protein dephosphorylation	-2.6	DUSP1|DUSP5|DUSP6|DUSP8|PPM1G|PPP2R5D|PTPN1|PTPRE|PTPRF|PTPRJ|PTP4A1|PTP4A2|PPM1D|PHLPP1|PPP1R15A|PTPN23|DUSP16|SSH2	-0.94
GO Biological Processes	GO:0045646	regulation of erythrocyte differentiation	-2.6	ACVR1B|ZFP36L1|FOXO3|HIF1A|INPP5D|STAT3|ZFP36	-0.93
GO Biological Processes	GO:0002696	positive regulation of leukocyte activation	-2.6	ACTB|CDKN1A|FGR|FOXO3|FLOT2|IGF1|IL6ST|INPP5D|JAK2|SLC7A1|TGFBR2|TYK2|VCAM1|ARID1A|IRS2|GAB2|PAXIP1|IGHV1-18|KMT5B|PELI1|ZMIZ1|ARID1B|ARID2|CCR2	-0.93
GO Biological Processes	GO:0010665	regulation of cardiac muscle cell apoptotic process	-2.6	CAPN2|JAK2|MAP3K5|NFE2L2|PPP1R10|RGL2	-0.93
GO Biological Processes	GO:0045820	negative regulation of glycolytic process	-2.6	STAT3|HDAC4|GIT1|DDIT4	-0.93
GO Biological Processes	GO:0070102	interleukin-6-mediated signaling pathway	-2.6	IL6ST|JAK1|JAK2|STAT3	-0.93
GO Biological Processes	GO:2000637	positive regulation of miRNA-mediated gene silencing	-2.6	EGFR|STAT3|ZFP36|LIMD1|PUM1	-0.93
GO Biological Processes	GO:0010640	regulation of platelet-derived growth factor receptor signaling pathway	-2.6	APOD|CBL|LOX|LRP1|PTPRJ	-0.93
GO Biological Processes	GO:0098586	cellular response to virus	-2.6	ADAR|EIF5A|HIF1A|IFNAR1|JAK1|JAK2|TYK2|WDFY4	-0.93
GO Biological Processes	GO:0008213	protein alkylation	-2.6	CREBBP|BTG2|CARM1|PRDM4|PAXIP1|NCOA6|KMT5B|ASH1L|KMT2C|CAMKMT|FBXO11|SETD7|DOT1L|BOD1L1	-0.92
GO Biological Processes	GO:0006479	protein methylation	-2.6	CREBBP|BTG2|CARM1|PRDM4|PAXIP1|NCOA6|KMT5B|ASH1L|KMT2C|CAMKMT|FBXO11|SETD7|DOT1L|BOD1L1	-0.92
GO Biological Processes	GO:0070302	regulation of stress-activated protein kinase signaling cascade	-2.6	CYLD|DUSP1|EGFR|FOXO1|MAP3K5|PER1|AXIN1|MAP4K4|TRAF4|HIPK3|GADD45G|PLCB1|PHLPP1|HIPK2|TAOK1|DUSP16|RELL1	-0.92
GO Biological Processes	GO:1902904	negative regulation of supramolecular fiber organization	-2.6	APC|CDH5|MAP1B|PRKCD|ATXN7|SPTBN1|TJP1|PPFIA1|WASF2|TRIOBP|CAMSAP2|CLASP1|TMOD3|TAOK1|SSH2	-0.92
GO Biological Processes	GO:0051494	negative regulation of cytoskeleton organization	-2.6	APC|CDH5|MAP1B|PRKCD|ATXN7|SPTBN1|TJP1|PPFIA1|WASF2|TRIOBP|CAMSAP2|CLASP1|TMOD3|TAOK1|SSH2	-0.92
GO Biological Processes	GO:0007178	transmembrane receptor protein serine/threonine kinase signaling pathway	-2.6	ACVR1B|CDH5|EGR1|JUN|SMAD1|PML|SKI|SPTBN1|STAT3|TGFBR2|TGFBR3|ZYX|FST|HIPK2|ZMIZ1|TGIF2	-0.92
GO Biological Processes	GO:0051101	regulation of DNA binding	-2.6	EP300|HMOX1|IGF1|JAK2|JUN|NFKBIA|SKI|KLF4|SIN3A|HIPK2|ILRUN|DOT1L	-0.91
GO Biological Processes	GO:0050730	regulation of peptidyl-tyrosine phosphorylation	-2.6	ABL1|CBL|CSF1R|EGFR|EREG|IGF1|IL6ST|JAK2|NEDD9|PRKCD|PTPN1|PTPRJ|TGFA|TNFRSF1A|SOCS3|MVP|SH2B3|INPP5F|ERRFI1	-0.9
GO Biological Processes	GO:0097190	apoptotic signaling pathway	-2.5	ABL1|ACVR1B|CDKN1A|DAPK1|EP300|FOXO3|GSK3B|HMOX1|JAK2|MAP3K5|NF1|PML|PPARD|PRKCD|TNFRSF1A|TNFRSF1B|SGPL1|PPP1R15A|HIPK2|DDIT4|HIPK1	-0.89
GO Biological Processes	GO:0042593	glucose homeostasis	-2.5	FOXO1|FOXO3|HIF1A|FOXK2|INSR|LEPR|SLC16A1|SRF|STAT3|ZNF236|IRS2|SLC39A14|SIN3A|LRRC8A|SESN2|SESN3	-0.89
GO Biological Processes	GO:0033209	tumor necrosis factor-mediated signaling pathway	-2.5	ACTN4|EIF5A|FOXO3|JAK2|NFKBIA|TNFRSF1A|TNFRSF1B	-0.89
GO Biological Processes	GO:0034101	erythrocyte homeostasis	-2.5	ADAR|EPAS1|HMOX1|JAK2|SRF|TGFBR3|PTBP3|SH2B3|FLVCR1|HIPK2|TMOD3	-0.89
GO Biological Processes	GO:1903311	regulation of mRNA metabolic process	-2.5	ZFP36L1|NUP98|PRKCD|SUPT6H|ZFP36|BTG2|MAPKAPK2|PUM1|TOB1|MBNL2|CNOT1|TNRC6B|PABPC1|AGO2|RC3H2|SAMD4B|DCP1A|TNRC6C|FASTKD5|RC3H1|PATL1|YTHDF3|MEX3D	-0.89
GO Biological Processes	GO:0033144	negative regulation of intracellular steroid hormone receptor signaling pathway	-2.5	ARNTL|DAB2|PER1|CLOCK|NCOR2|CNOT1	-0.88
GO Biological Processes	GO:0043367	CD4-positive, alpha-beta T cell differentiation	-2.5	ATP7A|RELB|RORA|STAT3|RC3H2|RC3H1	-0.88
GO Biological Processes	GO:1900181	negative regulation of protein localization to nucleus	-2.5	APOD|GSK3B|NF1|SIN3A|OTUD7B|ILRUN	-0.88
GO Biological Processes	GO:0033500	carbohydrate homeostasis	-2.5	FOXO1|FOXO3|HIF1A|FOXK2|INSR|LEPR|SLC16A1|SRF|STAT3|ZNF236|IRS2|SLC39A14|SIN3A|LRRC8A|SESN2|SESN3	-0.88
GO Biological Processes	GO:0042058	regulation of epidermal growth factor receptor signaling pathway	-2.5	CBL|EGFR|EREG|PTPRJ|TGFA|RAB7A|MVP|NUP62|ERRFI1	-0.88
GO Biological Processes	GO:0090109	regulation of cell-substrate junction assembly	-2.5	ABL1|ACTG1|APOD|PTPRJ|SDC4|VCL|MAP4K4|CLASP1|PEAK1	-0.88
GO Biological Processes	GO:0051893	regulation of focal adhesion assembly	-2.5	ABL1|ACTG1|APOD|PTPRJ|SDC4|VCL|MAP4K4|CLASP1|PEAK1	-0.88
GO Biological Processes	GO:0002252	immune effector process	-2.5	ABL1|ATP7A|SERPING1|C4A|CBL|FGR|INPP5D|LRP1|NOTCH2|PRKCD|RELB|RORA|ST3GAL1|STAT3|SNAP23|WDR1|SBNO2|PLEKHM2|IGHV1-18|RC3H2|RNF19B|RC3H1|TUBB	-0.88
GO Biological Processes	GO:0051346	negative regulation of hydrolase activity	-2.5	ABL1|SERPING1|C4A|GSK3B|NR4A1|ITIH1|LEPR|LRP1|LTF|NOS3|SERPINB10|POR|PZP|RPS6KA3|KLF4|SLC39A14|PPP1R15A|ANGPTL4|WNK1|UBE2Z|SERPINA12|BOD1L1|PLIN5	-0.88
GO Biological Processes	GO:0036003	positive regulation of transcription from RNA polymerase II promoter in response to stress	-2.5	ATF3|HIF1A|RBPJ|NFE2L2|SESN2	-0.87
GO Biological Processes	GO:1900370	positive regulation of post-transcriptional gene silencing by RNA	-2.5	EGFR|STAT3|ZFP36|LIMD1|PUM1	-0.87
GO Biological Processes	GO:0060148	positive regulation of post-transcriptional gene silencing	-2.5	EGFR|STAT3|ZFP36|LIMD1|PUM1	-0.87
GO Biological Processes	GO:0060419	heart growth	-2.5	SMAD1|PRKAR1A|TGFBR3|AKAP13|ARID2	-0.87
GO Biological Processes	GO:0051170	import into nucleus	-2.5	CDKN1A|NFKBIA|NUP98|PML|PPP1R10|RANBP2|STAT3|TPR|NUP153|NUP62|POM121C	-0.87
GO Biological Processes	GO:2000322	regulation of glucocorticoid receptor signaling pathway	-2.5	ARNTL|PER1|CLOCK	-0.87
GO Biological Processes	GO:1900246	positive regulation of RIG-I signaling pathway	-2.5	OASL|PUM1|ANKRD17	-0.87
GO Biological Processes	GO:0035791	platelet-derived growth factor receptor-beta signaling pathway	-2.5	ABL1|LOX|PTPN1	-0.87
GO Biological Processes	GO:0000414	regulation of histone H3-K36 methylation	-2.5	PAXIP1|BRD4|BCOR	-0.87
GO Biological Processes	GO:0072576	liver morphogenesis	-2.5	NOTCH2|PROX1|TGFA	-0.87
GO Biological Processes	GO:0031086	nuclear-transcribed mRNA catabolic process, deadenylation-independent decay	-2.5	ZFP36L1|ZFP36|DCP1A	-0.87
GO Biological Processes	GO:0071499	cellular response to laminar fluid shear stress	-2.5	NFE2L2|SREBF2|KLF4	-0.87
GO Biological Processes	GO:0007182	common-partner SMAD protein phosphorylation	-2.5	PML|SPTBN1|TGFBR2	-0.87
GO Biological Processes	GO:0070663	regulation of leukocyte proliferation	-2.5	CDKN1A|CSF1R|CSF2RA|IGF1|IL6ST|INPP5D|JAK2|PRKAR1A|SDC4|SLC7A1|TGFBR2|TNFRSF1B|TYK2|VCAM1|IRS2|PELI1|RC3H1|CCR2	-0.86
GO Biological Processes	GO:0046626	regulation of insulin receptor signaling pathway	-2.5	PRKCD|PTPN1|PTPRE|SOCS3|SORBS1|SIK2|SESN3|SERPINA12	-0.86
GO Biological Processes	GO:0055072	iron ion homeostasis	-2.5	ATP6AP1|EPAS1|HIF1A|HMOX1|LTF|TFR2|NCOA4|SLC39A14|FLVCR1|STEAP4	-0.85
GO Biological Processes	GO:0043393	regulation of protein binding	-2.5	ABL1|ACTB|CDKN1A|DAB2|EP300|EPB41|GSK3B|LOX|LRP1|PKD1|PRKCD|PTPRF|TGFBR3|SYMPK|RAPGEF2|HDAC4|HIPK2	-0.85
GO Biological Processes	GO:1900542	regulation of purine nucleotide metabolic process	-2.5	EP300|HIF1A|IGF1|INSR|NOS3|STAT3|HDAC4|GIT1|DDIT4	-0.85
GO Biological Processes	GO:0048015	phosphatidylinositol-mediated signaling	-2.5	ZFP36L1|CSF1R|IGF1|NF1|GAB2|INPP5F|PLCB1|KBTBD2|PLCE1	-0.85
GO Biological Processes	GO:0032352	positive regulation of hormone metabolic process	-2.5	DAB2|EGR1|HIF1A|POR	-0.85
GO Biological Processes	GO:0046321	positive regulation of fatty acid oxidation	-2.5	AKT2|PPARD|IRS2|PLIN5	-0.85
GO Biological Processes	GO:1903543	positive regulation of exosomal secretion	-2.5	SDC1|SDC4|RAB7A|STAM	-0.85
GO Biological Processes	GO:0060192	negative regulation of lipase activity	-2.5	ABL1|POR|ANGPTL4|PLIN5	-0.85
GO Biological Processes	GO:0014855	striated muscle cell proliferation	-2.5	SMAD1|PRKAR1A|TGFBR3|ARID2	-0.85
GO Biological Processes	GO:0001667	ameboidal-type cell migration	-2.5	ABL1|CDH5|HIF1A|NR4A1|MYH9|NOS3|PML|PPARD|SRF|ZFAND5|IQGAP1|SGPL1|ZEB2|WASF2|PAXIP1|SEMA6A	-0.85
GO Biological Processes	GO:0018108	peptidyl-tyrosine phosphorylation	-2.5	ABL1|BCR|CSF1R|EGFR|FGR|INSR|JAK1|JAK2|PRKCD|TYK2|HIPK3|HIPK2|PEAK1|HIPK1	-0.85
GO Biological Processes	GO:0002757	immune response-activating signal transduction	-2.5	ABL1|CREBBP|CRKL|EP300|FGR|INPP5D|PDE4B|PRKCD|PTPRJ|IGHV1-18|RC3H2|WNK1|RC3H1|NFAM1	-0.85
GO Biological Processes	GO:0071383	cellular response to steroid hormone stimulus	-2.5	ATP2B1|ZFP36L1|FOXO3|HMGCS2|JAK2|PPARD|ZFP36|NCOA4|ARID1A|ERRFI1|DDIT4|ZMIZ1|CALCOCO1|PAQR7	-0.85
GO Biological Processes	GO:0002429	immune response-activating cell surface receptor signaling pathway	-2.5	ABL1|CREBBP|CRKL|EP300|FGR|INPP5D|PDE4B|PRKCD|PTPRJ|IGHV1-18|RC3H2|WNK1|RC3H1|NFAM1	-0.85
GO Biological Processes	GO:0009743	response to carbohydrate	-2.5	ZFP36L1|EGR1|FOXO3|HMGCS2|MAP1B|PPARD|SRF|TGFBR2|ZNF236|IRS2|RASAL2|PLCB1|SLC39A14|SIN3A|SESN2	-0.85
GO Biological Processes	GO:0010907	positive regulation of glucose metabolic process	-2.5	AKT2|FOXO1|IGF1|INSR|IRS2|SORBS1	-0.85
GO Biological Processes	GO:0035194	post-transcriptional gene silencing by RNA	-2.5	ZFP36|LIMD1|CNOT1|TNRC6B|AGO2|TNRC6C	-0.85
GO Biological Processes	GO:0060964	regulation of miRNA-mediated gene silencing	-2.5	EGFR|STAT3|ZFP36|LIMD1|NCOR2|PUM1	-0.85
GO Biological Processes	GO:0010662	regulation of striated muscle cell apoptotic process	-2.5	CAPN2|JAK2|MAP3K5|NFE2L2|PPP1R10|RGL2	-0.85
GO Biological Processes	GO:0006511	ubiquitin-dependent protein catabolic process	-2.4	APC|ARNTL|CBL|CYLD|GSK3B|MAN1A1|NFE2L2|PML|TBL1X|TNFAIP1|STAM|AXIN1|BAP1|CLOCK|TRAF4|HUWE1|ARIH2|UBD|WWP1|ZSWIM8|USP22|UBR4|USP24|PTPN23|RC3H2|ZRANB1|OTUD7B|PELI1|USP31|TP53INP2|UBE2Z|FBXO11|KLHL15|KCTD10|USP32|RNF19B|RC3H1	-0.83
GO Biological Processes	GO:0010660	regulation of muscle cell apoptotic process	-2.4	CAPN2|HMOX1|IGF1|JAK2|MAP3K5|NFE2L2|PPP1R10|RGL2	-0.83
GO Biological Processes	GO:0097193	intrinsic apoptotic signaling pathway	-2.4	ABL1|CDKN1A|EP300|HMOX1|JAK2|MAP3K5|PML|PRKCD|TNFRSF1A|TNFRSF1B|PPP1R15A|HIPK2|DDIT4|HIPK1	-0.83
GO Biological Processes	GO:1901214	regulation of neuron death	-2.4	ABL1|CAPN2|CBL|EGR1|FOXO3|GSK3B|HIF1A|HMOX1|IL6ST|JAK2|JUN|MAP3K5|NF1|TNFRSF1B|BTG2|ZPR1|SLC23A2|FAIM2|HIPK2|DDIT4|CPEB4|TMEM259|EGLN3	-0.83
GO Biological Processes	GO:0010720	positive regulation of cell development	-2.4	ABL1|CDH5|CRKL|DAB2|DAG1|EGR2|HIF1A|IL6ST|MAP1B|NEDD9|RREB1|SRF|TNFRSF1B|WNT2|S1PR2|NTN1|TRIB1|TRIOBP|SPEN|PLXNB2|NIN|PREX1|PLXNA4	-0.83
GO Biological Processes	GO:0006140	regulation of nucleotide metabolic process	-2.4	EP300|HIF1A|IGF1|INSR|NOS3|STAT3|HDAC4|GIT1|DDIT4	-0.83
GO Biological Processes	GO:1904035	regulation of epithelial cell apoptotic process	-2.4	ABL1|ZFP36L1|CDH5|FOXO3|HMOX1|JAK2|NFE2L2|ZFP36|ANGPTL4	-0.83
GO Biological Processes	GO:0009299	mRNA transcription	-2.4	EPAS1|EREG|STAT3|SUPT6H|THRB|HIPK3|NCOA2	-0.83
GO Biological Processes	GO:0032386	regulation of intracellular transport	-2.4	AKT2|ANK3|APOD|ARHGAP1|DAB2|GSK3B|JAK2|MAP1B|MSN|MYO1C|NF1|NUMA1|PRKCD|PTPN1|SREBF2|SUPT6H|TPR|BAP1|ZPR1|NUP153|HUWE1|ARIH2|INPP5F|PTPN23|TBC1D20	-0.82
GO Biological Processes	GO:0014912	negative regulation of smooth muscle cell migration	-2.4	LRP1|NFE2L2|PPARD|S1PR2|TRIB1	-0.82
GO Biological Processes	GO:0031103	axon regeneration	-2.4	APOD|DAG1|JAK2|JUN|MAP1B	-0.82
GO Biological Processes	GO:0042634	regulation of hair cycle	-2.4	ARNTL|NUMA1|PER1|CLOCK|FST	-0.82
GO Biological Processes	GO:0098751	bone cell development	-2.4	ATP6AP1|EP300|SRF|SH2B3|WASF2	-0.82
GO Biological Processes	GO:0070665	positive regulation of leukocyte proliferation	-2.4	CDKN1A|CSF1R|CSF2RA|IGF1|IL6ST|JAK2|SLC7A1|TGFBR2|TYK2|VCAM1|IRS2|PELI1|CCR2	-0.82
GO Biological Processes	GO:0051147	regulation of muscle cell differentiation	-2.4	EREG|IGF1|LAMC1|SMAD1|NFATC3|PROX1|SRF|SUPT6H|HDAC4|ANKRD17|RBM38|SOX6|RBPMS2	-0.82
GO Biological Processes	GO:0050867	positive regulation of cell activation	-2.4	ACTB|CDKN1A|FGR|FOXO3|FLOT2|IGF1|IL6ST|INPP5D|JAK2|SLC7A1|TGFBR2|TYK2|VCAM1|ARID1A|IRS2|GAB2|PAXIP1|IGHV1-18|KMT5B|PELI1|ZMIZ1|ARID1B|ARID2|CCR2	-0.81
GO Biological Processes	GO:0010634	positive regulation of epithelial cell migration	-2.4	ABL1|RHOB|HIF1A|HMOX1|JUN|NFE2L2|NOS3|PROX1|RREB1|SP1|TGFBR2|MAP4K4|CLASP1|JCAD	-0.81
GO Biological Processes	GO:0048771	tissue remodeling	-2.4	ATP7A|TPP1|EPAS1|HIF1A|RBPJ|MITF|NOS3|NOTCH2|RAB7A|CCR2	-0.81
GO Biological Processes	GO:0016571	histone methylation	-2.4	CREBBP|CARM1|PRDM4|PAXIP1|NCOA6|KMT5B|ASH1L|KMT2C|SETD7|DOT1L|BOD1L1	-0.8
GO Biological Processes	GO:0035710	CD4-positive, alpha-beta T cell activation	-2.4	ATP7A|RELB|RORA|STAT3|RC3H2|RC3H1	-0.8
GO Biological Processes	GO:0010656	negative regulation of muscle cell apoptotic process	-2.4	HMOX1|IGF1|JAK2|NFE2L2|PPP1R10|RGL2	-0.8
GO Biological Processes	GO:0035601	protein deacylation	-2.4	CHD4|PER1|TBL1X|HDAC4|SIN3A|GATAD2A|GATAD2B|MIER1|MIDEAS	-0.8
GO Biological Processes	GO:0018107	peptidyl-threonine phosphorylation	-2.4	ACVR1B|GRK2|GSK3B|PRKCD|TGFBR2|HIPK3|HIPK2|WNK1|HIPK1	-0.8
GO Biological Processes	GO:0018212	peptidyl-tyrosine modification	-2.4	ABL1|BCR|CSF1R|EGFR|FGR|INSR|JAK1|JAK2|PRKCD|TYK2|HIPK3|HIPK2|PEAK1|HIPK1	-0.79
GO Biological Processes	GO:0071902	positive regulation of protein serine/threonine kinase activity	-2.4	CSF1R|DVL3|EGFR|INSR|LTF|MAP3K5|PKD1|PROX1|PTPN1|TGFA|AXIN1|IQGAP1|RAPGEF2|DAZAP2|AKAP13|TAOK1|CCNYL1	-0.79
GO Biological Processes	GO:0002253	activation of immune response	-2.4	ABL1|SERPING1|C4A|CREBBP|CRKL|EP300|FGR|INPP5D|PDE4B|PRKCD|PTPRJ|SIN3A|IGHV1-18|RC3H2|ZNFX1|WNK1|RC3H1|NFAM1	-0.79
GO Biological Processes	GO:0090398	cellular senescence	-2.4	ARNTL|CDKN1A|HMGA1|MAP3K5|PML|PRKCD|SRF	-0.79
GO Biological Processes	GO:0046632	alpha-beta T cell differentiation	-2.4	ABL1|ATP7A|RELB|RORA|STAT3|RC3H2|RC3H1	-0.79
GO Biological Processes	GO:0060538	skeletal muscle organ development	-2.4	ATF3|BCL9|DAG1|EGR1|EGR2|EP300|NR4A1|NF1|SKI|BTG2|MYH14|ZNF689	-0.78
GO Biological Processes	GO:1901654	response to ketone	-2.4	ATP2B1|CBL|CYBB|FOXO3|HMGCS2|JAK2|MBP|MSN|ABCB4|POR|TGFBR3|NCOA4|NCOA2|SIN3A|ERRFI1|DDIT4	-0.78
GO Biological Processes	GO:0030218	erythrocyte differentiation	-2.4	ADAR|EPAS1|JAK2|SRF|TGFBR3|PTBP3|SH2B3|FLVCR1|HIPK2|TMOD3	-0.78
GO Biological Processes	GO:0010885	regulation of cholesterol storage	-2.3	ABCA1|PPARD|SREBF2|TTC39B	-0.78
GO Biological Processes	GO:0043149	stress fiber assembly	-2.3	SRF|TNFAIP1|ZYX|SORBS1	-0.78
GO Biological Processes	GO:0060216	definitive hemopoiesis	-2.3	ADAR|BCR|TGFBR3|HIPK1	-0.78
GO Biological Processes	GO:0030038	contractile actin filament bundle assembly	-2.3	SRF|TNFAIP1|ZYX|SORBS1	-0.78
GO Biological Processes	GO:0010638	positive regulation of organelle organization	-2.3	ABL1|AKT2|EREG|ARHGAP35|GSK3B|HTT|HIF1A|IGF1|INSR|MAP1B|MSN|NUMA1|PML|PPP1R10|PROX1|SDC1|SDC4|TGFA|TPR|MTSS1|WDR1|WASF2|CNOT1|ATG2A|PLCB1|CLASP1|NUP62|SIN3A|GIT1|NIN|INO80|ATF7IP|HMBOX1	-0.78
GO Biological Processes	GO:0034284	response to monosaccharide	-2.3	EGR1|FOXO3|HMGCS2|PPARD|SRF|TGFBR2|ZNF236|IRS2|RASAL2|PLCB1|SLC39A14|SIN3A|SESN2	-0.78
GO Biological Processes	GO:1902903	regulation of supramolecular fiber organization	-2.3	ABL1|ACTG1|APC|CDH5|ARHGAP35|MAP1A|MAP1B|NUMA1|PRKCD|PROX1|ATXN7|SDC4|SPTBN1|TJP1|PPFIA1|MTSS1|WDR1|WASF2|TRIOBP|AKAP13|CAMSAP2|CLASP1|GIT1|TMOD3|NIN|TAOK1|SSH2	-0.77
GO Biological Processes	GO:0097435	supramolecular fiber organization	-2.3	ABL1|ACTG1|RHOB|RND3|ATP7A|JAK2|LOX|MEF2A|MYO1C|MYO1D|NEDD9|NF1|NUMA1|PRKAR1A|PROX1|SRF|TNFAIP1|TPM4|ZYX|AXIN1|GAS7|MICAL2|ELMO1|WDR1|SORBS1|TRIOBP|COLGALT2|CAMSAP2|CLASP1|CTNNA3|TMOD3|NIN|PREX1|RFLNB	-0.77
GO Biological Processes	GO:0150116	regulation of cell-substrate junction organization	-2.3	ABL1|ACTG1|APOD|PTPRJ|SDC4|VCL|MAP4K4|CLASP1|PEAK1	-0.77
GO Biological Processes	GO:0071384	cellular response to corticosteroid stimulus	-2.3	ATP2B1|ZFP36L1|FOXO3|HMGCS2|JAK2|ZFP36|ERRFI1|DDIT4	-0.77
GO Biological Processes	GO:0042060	wound healing	-2.3	ACTB|ACTG1|SERPING1|CDKN1A|DAG1|EREG|F12|F13A1|ARHGAP35|HIF1A|HMOX1|IGF1|LOX|MAP3K5|MYH9|NF1|NOTCH2|PPARD|SDC1|SDC4|SRF|TGFA|TGFBR2|VCL	-0.76
GO Biological Processes	GO:1904375	regulation of protein localization to cell periphery	-2.3	ACTB|DAB2|DAG1|EGFR|EPB41|LRP1|NUMA1|SPTBN1|PPFIA1|SORBS1|ZDHHC5|ATP2C1	-0.76
GO Biological Processes	GO:0035909	aorta morphogenesis	-2.3	RBPJ|LRP1|PROX1|SRF|ADAMTS9	-0.76
GO Biological Processes	GO:0001894	tissue homeostasis	-2.3	ACTB|ACTG1|CDH5|TPP1|EPAS1|LAMC1|LTF|MBP|NOS3|SRF|TJP1|VCL|RAB7A|TJP2|NKIRAS2|TP53INP2|CCR2	-0.76
GO Biological Processes	GO:0061448	connective tissue development	-2.3	ATP7A|EGR1|HIF1A|HMGCS2|LOX|SMAD1|PKD1|PPARD|SRF|TGFBR2|RASAL2|CHSY1|PAXIP1|SLC39A14|SOX6|SULF2|SLC25A25	-0.76
GO Biological Processes	GO:0032388	positive regulation of intracellular transport	-2.3	AKT2|ANK3|DAB2|GSK3B|JAK2|MSN|MYO1C|NUMA1|PRKCD|SREBF2|TPR|BAP1|ZPR1|HUWE1|ARIH2|PTPN23|TBC1D20	-0.76
GO Biological Processes	GO:0002686	negative regulation of leukocyte migration	-2.3	APOD|BCR|DUSP1|HMOX1|PLCB1|RIN3	-0.76
GO Biological Processes	GO:0045740	positive regulation of DNA replication	-2.3	EGFR|EREG|TNFAIP1|SMARCA5|BRPF3|INO80	-0.76
GO Biological Processes	GO:0001938	positive regulation of endothelial cell proliferation	-2.3	HIF1A|HMOX1|NR4A1|JUN|NF1|PROX1|SP1|STAT3|WNT2|JCAD	-0.76
GO Biological Processes	GO:0010508	positive regulation of autophagy	-2.3	DAPK1|FOXO1|FOXO3|GSK3B|HTT|HIF1A|HMOX1|PAFAH1B2|ATG2A|WAC|TP53INP2|SESN2|SESN3	-0.76
GO Biological Processes	GO:0050778	positive regulation of immune response	-2.3	ABL1|SERPING1|C4A|CREBBP|CRKL|EP300|EREG|FGR|IL1R1|IL6ST|INPP5D|JAK2|PDE4B|PRKCD|PTPRJ|TYK2|GAB2|PAXIP1|SIN3A|IGHV1-18|KMT5B|RC3H2|AKIRIN2|ZNFX1|WNK1|RC3H1|NFAM1|CCR2	-0.75
GO Biological Processes	GO:0046324	regulation of glucose import	-2.3	AKT2|IGF1|INSR|MEF2A|NFE2L2|IRS2|SORBS1	-0.75
GO Biological Processes	GO:0002009	morphogenesis of an epithelium	-2.3	ABL1|ACTB|ACTG1|RHOB|ATP7A|CSF1R|DAG1|DVL3|EGFR|ARHGAP35|HIF1A|RBPJ|MSN|NOTCH2|PKD1|PML|PROX1|SDC4|SKI|SRF|TGFBR2|VCL|SOCS3|KLF4|NTN1|MICAL2|MTSS1|WDR1|FST|PLXNB2	-0.75
GO Biological Processes	GO:0033212	iron import into cell	-2.3	TFR2|SLC39A14|STEAP4	-0.75
GO Biological Processes	GO:0010887	negative regulation of cholesterol storage	-2.3	ABCA1|PPARD|TTC39B	-0.75
GO Biological Processes	GO:0098974	postsynaptic actin cytoskeleton organization	-2.3	ACTB|ACTG1|WASF2	-0.75
GO Biological Processes	GO:2000643	positive regulation of early endosome to late endosome transport	-2.3	DAB2|MSN|PTPN23	-0.75
GO Biological Processes	GO:2000074	regulation of type B pancreatic cell development	-2.3	ARNTL|GSK3B|CLOCK	-0.75
GO Biological Processes	GO:0090594	inflammatory response to wounding	-2.3	HIF1A|HMOX1|CCR2	-0.75
GO Biological Processes	GO:0019941	modification-dependent protein catabolic process	-2.3	APC|ARNTL|CBL|CYLD|GSK3B|MAN1A1|NFE2L2|PML|TBL1X|TNFAIP1|STAM|AXIN1|BAP1|CLOCK|TRAF4|HUWE1|ARIH2|UBD|WWP1|ZSWIM8|USP22|UBR4|USP24|PTPN23|RC3H2|ZRANB1|OTUD7B|PELI1|USP31|TP53INP2|UBE2Z|FBXO11|KLHL15|KCTD10|USP32|RNF19B|RC3H1	-0.75
GO Biological Processes	GO:1903037	regulation of leukocyte cell-cell adhesion	-2.3	ACTB|FOXO3|FLOT2|IGF1|IL6ST|JAK2|PRKAR1A|SDC4|SLC7A1|TGFBR2|TYK2|VCAM1|ARID1A|KLF4|RC3H2|PELI1|ZMIZ1|ARID1B|WNK1|RC3H1|ARID2|CCR2	-0.75
GO Biological Processes	GO:0008283	cell population proliferation	-2.3	ABL1|ZFP36L1|CSF1R|EGR1|ELF4|EREG|HMOX1|IGF1|LEPR|SMAD1|MSN|NOTCH2|PPARD|PRKAR1A|PRKCD|PROX1|RORA|STAT3|TGFA|TGFBR3|TXNRD1|WNT2|ZPR1|MTSS1|ARIH2|FST|PLXNB2|RC3H2|MCM10|RC3H1|ARID2	-0.75
GO Biological Processes	GO:0002274	myeloid leukocyte activation	-2.3	CBL|RBPJ|JAK2|JUN|NOTCH2|PRKCD|RELB|TGFBR2|SNAP23|UBD|SBNO2|PREX1	-0.75
GO Biological Processes	GO:0048017	inositol lipid-mediated signaling	-2.3	ZFP36L1|CSF1R|IGF1|NF1|GAB2|INPP5F|PLCB1|KBTBD2|PLCE1	-0.75
GO Biological Processes	GO:0006879	cellular iron ion homeostasis	-2.3	ATP6AP1|HIF1A|HMOX1|TFR2|NCOA4|SLC39A14|FLVCR1|STEAP4	-0.74
GO Biological Processes	GO:0061515	myeloid cell development	-2.3	ATP6AP1|EP300|SRF|PTBP3|SH2B3|WASF2|FLVCR1|TMOD3	-0.74
GO Biological Processes	GO:0001678	cellular glucose homeostasis	-2.3	FOXO1|FOXO3|HIF1A|FOXK2|SRF|ZNF236|IRS2|SLC39A14|SIN3A|LRRC8A	-0.73
GO Biological Processes	GO:0060840	artery development	-2.3	EGR2|RBPJ|LOX|LRP1|NF1|PROX1|SRF|ADAMTS9|ZMIZ1|ARID2	-0.73
GO Biological Processes	GO:0071407	cellular response to organic cyclic compound	-2.3	ABL1|ACTB|ATP2B1|ZFP36L1|CHRM2|DAG1|EGFR|EGR1|FOXO3|FOLR2|GSK3B|HMGCS2|ITPR2|JAK2|SMAD1|MSN|PDE4B|ABCB4|PPARD|RORA|SLC16A1|ZFP36|NCOA4|ARID1A|RAPGEF2|PLCB1|SIN3A|ERRFI1|DDIT4|ZMIZ1|CALCOCO1|PAQR7	-0.73
GO Biological Processes	GO:0001501	skeletal system development	-2.3	ATP6AP1|ATP7A|FOXN3|EP300|ETS2|FGR|HIF1A|IGF1|LEPR|LTF|SMAD1|PKD1|RPS6KA3|SKI|SRF|TGFBR2|ZFAND5|SGPL1|SH2B3|WASF2|FST|AKAP13|CHSY1|SLC39A14|SLC39A1|FLVCR1|ANKRD11|SOX6|ASH1L|SULF2|RFLNB	-0.72
GO Biological Processes	GO:0006402	mRNA catabolic process	-2.3	ZFP36L1|ZFP36|SMG7|CNOT1|PABPC1|RC3H2|SAMD4B|DCP1A|SMG9|HELZ2|RC3H1|PATL1	-0.72
GO Biological Processes	GO:0048662	negative regulation of smooth muscle cell proliferation	-2.3	APOD|CDKN1A|HMOX1|NOS3|PPARD|S1PR2|TRIB1	-0.71
GO Biological Processes	GO:0098732	macromolecule deacylation	-2.2	CHD4|PER1|TBL1X|HDAC4|SIN3A|GATAD2A|GATAD2B|MIER1|MIDEAS	-0.71
GO Biological Processes	GO:2000819	regulation of nucleotide-excision repair	-2.2	ACTB|ARID1A|BCL7B|ARID1B|ARID2	-0.71
GO Biological Processes	GO:0050996	positive regulation of lipid catabolic process	-2.2	AKT2|PRKCD|IRS2|PNPLA2|PLIN5	-0.71
GO Biological Processes	GO:0097028	dendritic cell differentiation	-2.2	RBPJ|NOTCH2|RELB|TGFBR2|UBD	-0.71
GO Biological Processes	GO:0007519	skeletal muscle tissue development	-2.2	ATF3|BCL9|EGR1|EGR2|EP300|NR4A1|NF1|SKI|BTG2|MYH14|ZNF689	-0.71
GO Biological Processes	GO:0030220	platelet formation	-2.2	EP300|MYH9|SRF|WDR1	-0.71
GO Biological Processes	GO:0035970	peptidyl-threonine dephosphorylation	-2.2	DUSP1|DUSP5|PPM1G|PPM1D	-0.71
GO Biological Processes	GO:0035855	megakaryocyte development	-2.2	EP300|SRF|SH2B3|WASF2	-0.71
GO Biological Processes	GO:0030206	chondroitin sulfate biosynthetic process	-2.2	CHSY1|DSE|CHST7|CHPF	-0.71
GO Biological Processes	GO:0039535	regulation of RIG-I signaling pathway	-2.2	SEC14L1|OASL|PUM1|ANKRD17	-0.71
GO Biological Processes	GO:0036344	platelet morphogenesis	-2.2	EP300|MYH9|SRF|WDR1	-0.71
GO Biological Processes	GO:0008631	intrinsic apoptotic signaling pathway in response to oxidative stress	-2.2	JAK2|MAP3K5|PML|PRKCD	-0.71
GO Biological Processes	GO:1903541	regulation of exosomal secretion	-2.2	SDC1|SDC4|RAB7A|STAM	-0.71
GO Biological Processes	GO:0051151	negative regulation of smooth muscle cell differentiation	-2.2	EREG|NFATC3|ANKRD17|RBPMS2	-0.71
GO Biological Processes	GO:0048844	artery morphogenesis	-2.2	RBPJ|LRP1|NF1|PROX1|SRF|ADAMTS9|ZMIZ1|ARID2	-0.71
GO Biological Processes	GO:0032886	regulation of microtubule-based process	-2.2	ABL1|APC|CDH5|CYLD|GSK3B|MAP1A|MAP1B|NUMA1|PKD1|ATXN7|TPR|RASSF1|CAMSAP2|CLASP1|NUP62|GIT1|NIN|TAOK1|CEP76	-0.7
GO Biological Processes	GO:0071356	cellular response to tumor necrosis factor	-2.2	ACTN4|ZFP36L1|EIF5A|FOXO3|JAK2|MAP3K5|NFE2L2|NFKBIA|RORA|TNFRSF1A|TNFRSF1B|VCAM1|ZFP36	-0.7
GO Biological Processes	GO:0042129	regulation of T cell proliferation	-2.2	IGF1|IL6ST|JAK2|PRKAR1A|SDC4|SLC7A1|TGFBR2|TNFRSF1B|TYK2|VCAM1|PELI1|RC3H1|CCR2	-0.7
GO Biological Processes	GO:0006029	proteoglycan metabolic process	-2.2	EXTL2|IGF1|PPARD|CHSY1|DSE|SULF2|CHST7|CHPF|PXYLP1	-0.68
GO Biological Processes	GO:0032970	regulation of actin filament-based process	-2.2	ABL1|ACTG1|RHOB|RND3|CSF1R|ARHGAP35|LRP1|MYH9|NOTCH2|PDE4B|PRKCD|PROX1|SDC4|SPTBN1|TJP1|PPFIA1|IQGAP1|MTSS1|WDR1|WASF2|TRIOBP|AKAP13|CLASP1|CTNNA3|TMOD3|TAOK1|SSH2	-0.68
GO Biological Processes	GO:0007568	aging	-2.2	APOD|ATP2B1|SERPING1|DAG1|FOXO3|IGFBP1|MBP|ND4|NFE2L2|TGFBR2|TNFRSF1B|VCAM1|CARM1|SIN3A	-0.68
GO Biological Processes	GO:0043536	positive regulation of blood vessel endothelial cell migration	-2.2	ABL1|HIF1A|HMOX1|NFE2L2|NOS3|SP1|JCAD	-0.68
GO Biological Processes	GO:0035904	aorta development	-2.2	EGR2|RBPJ|LOX|LRP1|PROX1|SRF|ADAMTS9	-0.68
GO Biological Processes	GO:0050863	regulation of T cell activation	-2.2	ABL1|ACTB|FOXO3|FLOT2|IGF1|IL6ST|JAK2|PRKAR1A|SDC4|SLC7A1|TGFBR2|TNFRSF1B|TYK2|VCAM1|ARID1A|RC3H2|PELI1|ZMIZ1|ARID1B|RC3H1|ARID2|CCR2	-0.68
GO Biological Processes	GO:0062208	positive regulation of pattern recognition receptor signaling pathway	-2.2	LTF|OASL|PUM1|ZDHHC5|ANKRD17|PELI1	-0.67
GO Biological Processes	GO:0001776	leukocyte homeostasis	-2.2	ABL1|HIF1A|PDE4B|BAP1|SH2B3|RC3H2|RC3H1|CCR2	-0.67
GO Biological Processes	GO:1904377	positive regulation of protein localization to cell periphery	-2.2	EGFR|EPB41|LRP1|NUMA1|SPTBN1|SORBS1|ZDHHC5|ATP2C1	-0.67
GO Biological Processes	GO:0040029	regulation of gene expression, epigenetic	-2.2	EP300|PHF2|ARID1A|AXIN1|SMARCA5|PPM1D|CDYL|HDAC4|ZNFX1|ARID1B|DOT1L	-0.66
GO Biological Processes	GO:1902105	regulation of leukocyte differentiation	-2.2	ABL1|ACTB|ZFP36L1|FOXO3|INPP5D|LTF|MITF|NF1|NOTCH2|TGFBR2|ARID1A|TRIB1|TOB2|RC3H2|ZMIZ1|ARID1B|RC3H1|NFAM1|ARID2|CCR2	-0.66
GO Biological Processes	GO:1903034	regulation of response to wounding	-2.2	ACTG1|ATP7A|SERPING1|F12|NFE2L2|NOS3|PRKCD|PTPRF|RREB1|KLF4|SH2B3|INPP5F|CLASP1|GIT1	-0.66
GO Biological Processes	GO:0071354	cellular response to interleukin-6	-2.2	IL6ST|JAK1|JAK2|STAT3|SBNO2	-0.66
GO Biological Processes	GO:0098927	vesicle-mediated transport between endosomal compartments	-2.2	MYO1D|RAB7A|ATG14|PTPN23|KIF16B	-0.66
GO Biological Processes	GO:0060323	head morphogenesis	-2.2	EP300|SKI|SGPL1|FLVCR1|ANKRD11	-0.66
GO Biological Processes	GO:0043632	modification-dependent macromolecule catabolic process	-2.2	APC|ARNTL|CBL|CYLD|GSK3B|MAN1A1|NFE2L2|PML|TBL1X|TNFAIP1|STAM|AXIN1|BAP1|CLOCK|TRAF4|HUWE1|ARIH2|UBD|WWP1|ZSWIM8|USP22|UBR4|USP24|PTPN23|RC3H2|ZRANB1|OTUD7B|PELI1|USP31|TP53INP2|UBE2Z|FBXO11|KLHL15|KCTD10|USP32|RNF19B|RC3H1	-0.66
GO Biological Processes	GO:0022406	membrane docking	-2.2	STX2|MSN|SNAP25|VCAM1|RAB7A|STX11|ATG14|STX12|VMP1|STX1B	-0.66
GO Biological Processes	GO:0050670	regulation of lymphocyte proliferation	-2.2	CDKN1A|IGF1|IL6ST|INPP5D|JAK2|PRKAR1A|SDC4|SLC7A1|TGFBR2|TNFRSF1B|TYK2|VCAM1|IRS2|PELI1|RC3H1|CCR2	-0.65
GO Biological Processes	GO:0001558	regulation of cell growth	-2.2	ABL1|ACVR1B|CDKN1A|CRKL|DAB2|EGFR|GSK3B|IGF1|IGFBP1|MAP1B|PML|PPARD|PTPRJ|RPS6KA3|SRF|BAP1|NTN1|SLC23A2|SIN3A|TMEM97|PLCE1|INO80|ATAD3A|SEMA6A|DIP2B|CXCL16|SESN2|KIAA1109|PLXNA4	-0.65
GO Biological Processes	GO:0030166	proteoglycan biosynthetic process	-2.1	EXTL2|IGF1|CHSY1|DSE|CHST7|CHPF|PXYLP1	-0.64
GO Biological Processes	GO:0002065	columnar/cuboidal epithelial cell differentiation	-2.1	ABL1|HIF1A|IL6ST|MAP1B|PROX1|C1GALT1|GPAT4|TUBB	-0.64
GO Biological Processes	GO:0001780	neutrophil homeostasis	-2.1	PDE4B|SH2B3|CCR2	-0.64
GO Biological Processes	GO:1904779	regulation of protein localization to centrosome	-2.1	APC|GSK3B|NUP62	-0.64
GO Biological Processes	GO:0031953	negative regulation of protein autophosphorylation	-2.1	JUN|MVP|ERRFI1	-0.64
GO Biological Processes	GO:0071281	cellular response to iron ion	-2.1	ATP7A|HMOX1|TFR2	-0.64
GO Biological Processes	GO:2000628	regulation of miRNA metabolic process	-2.1	ZSWIM8|RC3H2|RC3H1	-0.64
GO Biological Processes	GO:0030111	regulation of Wnt signaling pathway	-2.1	ABL1|APC|ARNTL|CYLD|DAB2|EGFR|EGR1|FOXO1|FOXO3|GSK3B|IGFBP1|RBPJ|LRP1|SKI|TBL1X|AXIN1|LIMD1|ZEB2|ZRANB1|SULF2|CHD8|SENP2|WNK1|CCNYL1	-0.64
GO Biological Processes	GO:0055082	cellular chemical homeostasis	-2.1	ATP2B1|ATP6V0A1|ATP6AP1|ATP7A|CDH5|SLC31A2|FOXO1|FOXO3|HIF1A|HMOX1|FOXK2|MT2A|PML|SRF|TFR2|ZNF236|RAB7A|NCOA4|IRS2|XPR1|CHERP|SLC39A14|SIN3A|ATP2C1|FLVCR1|LRRC8A|ATP13A1|STEAP4|SLC30A7|SLC41A1|RNASEK|CCR2	-0.64
GO Biological Processes	GO:0060759	regulation of response to cytokine stimulus	-2.1	ADAR|CYLD|HIF1A|IL1R1|IL1RN|PTPN1|TNFRSF1A|KLF4|SH2B3|SAMHD1|NKIRAS2|HIPK1|YTHDF3	-0.64
GO Biological Processes	GO:1900543	negative regulation of purine nucleotide metabolic process	-2.1	STAT3|HDAC4|GIT1|DDIT4	-0.64
GO Biological Processes	GO:0046641	positive regulation of alpha-beta T cell proliferation	-2.1	JAK2|TGFBR2|TYK2|CCR2	-0.64
GO Biological Processes	GO:0032691	negative regulation of interleukin-1 beta production	-2.1	IGF1|PML|GIT1|ERRFI1	-0.64
GO Biological Processes	GO:1900034	regulation of cellular response to heat	-2.1	CREBBP|EP300|GSK3B|MAPKAPK2	-0.64
GO Biological Processes	GO:0018393	internal peptidyl-lysine acetylation	-2.1	ACTB|CREBBP|EP300|PER1|POR|ATXN7|CLOCK|SRCAP|USP22|BRPF3|YEATS2|TADA2B	-0.64
GO Biological Processes	GO:0060324	face development	-2.1	EP300|SKI|SRF|ZFAND5|SGPL1|ANKRD11	-0.64
GO Biological Processes	GO:0022612	gland morphogenesis	-2.1	CSF1R|DAG1|EGFR|MSN|NOTCH2|PML|PROX1|TGFA|TGFBR2|NTN1	-0.64
GO Biological Processes	GO:0010631	epithelial cell migration	-2.1	ABL1|CDH5|NR4A1|MYH9|NOS3|PPARD|SRF|ZEB2|PAXIP1	-0.64
GO Biological Processes	GO:0045927	positive regulation of growth	-2.1	EGFR|IGF1|IGFBP1|RBPJ|INSR|MAP1B|PPARD|PROX1|RPS6KA3|SRF|TGFBR2|TGFBR3|WNT2|ZPR1|NTN1|SLC23A2|PLCB1|INO80|CXCL16	-0.63
GO Biological Processes	GO:0006897	endocytosis	-2.1	ABCA1|ABL1|ACTB|ACTG1|GRK2|AP2A1|DAB2|INSR|LRP1|LY75|MYH9|SH3GL1|SNAP25|TFR2|TGFBR2|RAB7A|MAPKAPK2|CD163|ELMO1|WASF2|INPP5F|LRP10|IGHV1-18|NCKIPSD|DENND1A|CXCL16|RIN3|KIAA1109|RNASEK	-0.62
GO Biological Processes	GO:0032944	regulation of mononuclear cell proliferation	-2.1	CDKN1A|IGF1|IL6ST|INPP5D|JAK2|PRKAR1A|SDC4|SLC7A1|TGFBR2|TNFRSF1B|TYK2|VCAM1|IRS2|PELI1|RC3H1|CCR2	-0.62
GO Biological Processes	GO:0006475	internal protein amino acid acetylation	-2.1	ACTB|CREBBP|EP300|PER1|POR|ATXN7|CLOCK|SRCAP|USP22|BRPF3|YEATS2|TADA2B	-0.62
GO Biological Processes	GO:0045638	negative regulation of myeloid cell differentiation	-2.1	ZFP36L1|INPP5D|LTF|NF1|NFKBIA|ZFP36|TRIB1|TOB2	-0.62
GO Biological Processes	GO:0033143	regulation of intracellular steroid hormone receptor signaling pathway	-2.1	ARNTL|DAB2|EP300|PER1|CLOCK|NCOR2|CARM1|CNOT1	-0.62
GO Biological Processes	GO:0045069	regulation of viral genome replication	-2.1	ADAR|NR5A2|LTF|PROX1|OASL|TNIP1|PABPC1|ZNFX1	-0.62
GO Biological Processes	GO:0030239	myofibril assembly	-2.1	ACTG1|MEF2A|PRKAR1A|PROX1|SRF|WDR1|TMOD3	-0.61
GO Biological Processes	GO:1901985	positive regulation of protein acetylation	-2.1	ARNTL|PML|SMARCA5|PAXIP1|TAOK1|DIP2B|TADA2B	-0.61
GO Biological Processes	GO:1903053	regulation of extracellular matrix organization	-2.1	ABL1|DAG1|LAMC1|LRP1|TNFRSF1A|TNFRSF1B|CLASP1	-0.61
GO Biological Processes	GO:0038061	NIK/NF-kappaB signaling	-2.1	NFKB2|REL|RELB|TRAF4|ZFP91	-0.61
GO Biological Processes	GO:0045648	positive regulation of erythrocyte differentiation	-2.1	ACVR1B|FOXO3|HIF1A|INPP5D|STAT3	-0.61
GO Biological Processes	GO:0060390	regulation of SMAD protein signal transduction	-2.1	DAB2|JAK2|LRP1|SPTBN1|TOB1	-0.61
GO Biological Processes	GO:0045616	regulation of keratinocyte differentiation	-2.1	ZFP36L1|NUMA1|PLAAT4|ZFP36|ERRFI1	-0.61
GO Biological Processes	GO:0090132	epithelium migration	-2.1	ABL1|CDH5|NR4A1|MYH9|NOS3|PPARD|SRF|ZEB2|PAXIP1	-0.61
GO Biological Processes	GO:1903578	regulation of ATP metabolic process	-2.1	ATP7A|EP300|HIF1A|IGF1|INSR|STAT3|HDAC4|GIT1|DDIT4	-0.61
GO Biological Processes	GO:0016311	dephosphorylation	-2.1	DUSP1|DUSP5|DUSP6|DUSP8|INPP5D|PPM1G|PPP2R5D|PTPN1|PTPRE|PTPRF|PTPRJ|PTP4A1|PTP4A2|PPM1D|INPP5F|PHLPP1|PPP1R15A|PTPN23|LPIN3|DUSP16|SSH2|PXYLP1	-0.61
GO Biological Processes	GO:0006473	protein acetylation	-2.1	ACTB|CREBBP|EP300|FOXO1|PER1|POR|ATXN7|CLOCK|SRCAP|USP22|BRPF3|YEATS2|TADA2B	-0.6
GO Biological Processes	GO:0055088	lipid homeostasis	-2.1	ABCA1|NR5A2|GOT1|ABCB4|RORA|SREBF2|IRS2|MED13|TMEM97|ANGPTL4|PNPLA2|SESN2|TTC39B	-0.6
GO Biological Processes	GO:0062013	positive regulation of small molecule metabolic process	-2.1	AKT2|DAB2|FOXO1|HIF1A|IGF1|INSR|NOS3|POR|PPARD|IRS2|SORBS1|PLIN5	-0.6
GO Biological Processes	GO:0043124	negative regulation of I-kappaB kinase/NF-kappaB signaling	-2.1	ABL1|PER1|RORA|TNIP1|ASH1L|OTUD7B	-0.6
GO Biological Processes	GO:1900015	regulation of cytokine production involved in inflammatory response	-2.1	APOD|HIF1A|PER1|STAT3|BAP1|PLD3	-0.6
GO Biological Processes	GO:0055001	muscle cell development	-2.1	ACTG1|ACTN4|IGF1|LOX|MEF2A|PRKAR1A|PROX1|SDC1|SKI|SRF|WDR1|AKAP13|TMOD3	-0.58
GO Biological Processes	GO:0001892	embryonic placenta development	-2.1	ZFP36L1|EGFR|EPAS1|HIF1A|RBPJ|PKD1|WNT2|SOCS3|SENP2	-0.58
GO Biological Processes	GO:0018210	peptidyl-threonine modification	-2.1	ACVR1B|GRK2|GSK3B|PRKCD|TGFBR2|HIPK3|HIPK2|WNK1|HIPK1	-0.58
GO Biological Processes	GO:0035023	regulation of Rho protein signal transduction	-2.1	ABCA1|ABL1|BCR|ARHGAP35|MYO9B|TNFAIP1|AKAP13|EPS8L2|KCTD10	-0.58
GO Biological Processes	GO:1904705	regulation of vascular associated smooth muscle cell proliferation	-2.1	CDKN1A|HMOX1|IGF1|JAK2|JUN|MAP3K5|S1PR2	-0.58
GO Biological Processes	GO:0050732	negative regulation of peptidyl-tyrosine phosphorylation	-2.1	CBL|PRKCD|SOCS3|MVP|SH2B3|INPP5F|ERRFI1	-0.58
GO Biological Processes	GO:0061180	mammary gland epithelium development	-2.1	AKT2|CSF1R|HIF1A|JAK2|PML|WNT2|NTN1	-0.58
GO Biological Processes	GO:0010632	regulation of epithelial cell migration	-2	ABL1|RHOB|HIF1A|HMOX1|JUN|NF1|NFE2L2|NOS3|PROX1|RREB1|SP1|TGFBR2|KLF4|MAP4K4|CLASP1|PTPN23|ADAMTS9|JCAD	-0.58
GO Biological Processes	GO:0001819	positive regulation of cytokine production	-2	ABL1|CSF1R|CYBB|EGR1|EREG|FGR|HIF1A|HMOX1|IL1R1|IL6ST|JAK2|MBP|PDE4B|PTPRJ|RORA|SPTBN1|STAT3|TYK2|MAPKAPK2|PLCB1|AKIRIN2|SULF2|DHX33|PELI1|NFAM1|CCR2	-0.58
GO Biological Processes	GO:0018394	peptidyl-lysine acetylation	-2	ACTB|CREBBP|EP300|PER1|POR|ATXN7|CLOCK|SRCAP|USP22|BRPF3|YEATS2|TADA2B	-0.58
GO Biological Processes	GO:0016579	protein deubiquitination	-2	CYLD|ATXN7|BAP1|USP22|USP24|USP53|ZRANB1|OTUD7B|USP31|USP32|TADA2B|USP54	-0.58
GO Biological Processes	GO:0045980	negative regulation of nucleotide metabolic process	-2	STAT3|HDAC4|GIT1|DDIT4	-0.58
GO Biological Processes	GO:0071498	cellular response to fluid shear stress	-2	NFE2L2|SREBF2|KLF4|MTSS1	-0.58
GO Biological Processes	GO:2000479	regulation of cAMP-dependent protein kinase activity	-2	HTT|PRKAR1A|RAPGEF2|SESN2	-0.58
GO Biological Processes	GO:0010667	negative regulation of cardiac muscle cell apoptotic process	-2	JAK2|NFE2L2|PPP1R10|RGL2	-0.58
GO Biological Processes	GO:0033002	muscle cell proliferation	-2	SMAD1|PRKAR1A|TGFBR3|ARID2	-0.58
GO Biological Processes	GO:0042110	T cell activation	-2	ABL1|ATP7A|ZFP36L1|EGR1|ELF4|LEPR|MSN|MYH9|RELB|RORA|SRF|STAT3|KIF13B|RC3H2|PREX1|WDFY4|RC3H1	-0.58
GO Biological Processes	GO:0043010	camera-type eye development	-2	ATP2B1|EGFR|ARHGAP35|HIF1A|JUN|MITF|NF1|NOTCH2|PROX1|SKI|SRF|TGFBR2|THRB|WNT2|KLF4|LAMC3|HIPK2|TGIF2|SLC25A25|TBC1D20|HIPK1	-0.57
GO Biological Processes	GO:0031099	regeneration	-2	APOD|BCL9|CDKN1A|DAG1|HMOX1|IGF1|IGFBP1|JAK2|JUN|MAP1B|PTPRF|TGFBR2|TGFBR3	-0.57
GO Biological Processes	GO:0031116	positive regulation of microtubule polymerization	-2	MAP1B|NUMA1|CLASP1|GIT1|NIN	-0.57
GO Biological Processes	GO:1902042	negative regulation of extrinsic apoptotic signaling pathway via death domain receptors	-2	GSK3B|HMOX1|NOS3|FAIM2|ITPRIP	-0.57
GO Biological Processes	GO:0060674	placenta blood vessel development	-2	RBPJ|NOTCH2|PKD1|WNT2|SOCS3	-0.57
GO Biological Processes	GO:0060421	positive regulation of heart growth	-2	IGF1|RBPJ|PROX1|TGFBR3|WNT2	-0.57
GO Biological Processes	GO:0010574	regulation of vascular endothelial growth factor production	-2	HIF1A|IL6ST|RORA|SULF2|CCR2	-0.57
GO Biological Processes	GO:1905954	positive regulation of lipid localization	-2	ABCA1|PLIN2|CYP8B1|DAB2|LRP1|NFKBIA|ABCB4|PRKCD|SREBF2|PLIN5	-0.57
GO Biological Processes	GO:0032956	regulation of actin cytoskeleton organization	-2	ABL1|ACTG1|RHOB|RND3|CSF1R|ARHGAP35|LRP1|NOTCH2|PRKCD|PROX1|SDC4|SPTBN1|TJP1|PPFIA1|IQGAP1|MTSS1|WDR1|WASF2|TRIOBP|AKAP13|CLASP1|TMOD3|TAOK1|SSH2	-0.56
GO Biological Processes	GO:0051384	response to glucocorticoid	-2	ATP2B1|ZFP36L1|FOXO3|GOT1|HMGCS2|IL1RN|JAK2|POR|SDC1|ZFP36|ERRFI1|DDIT4	-0.56
GO Biological Processes	GO:0001959	regulation of cytokine-mediated signaling pathway	-2	ADAR|CYLD|HIF1A|IL1R1|IL1RN|PTPN1|TNFRSF1A|SH2B3|SAMHD1|NKIRAS2|HIPK1|YTHDF3	-0.56
GO Biological Processes	GO:0051146	striated muscle cell differentiation	-2	ACTG1|BCL9|CAPN2|IGF1|MEF2A|MYH9|PRKAR1A|PROX1|SDC1|SKI|SRF|WDR1|AKAP13|PLD3|TMOD3	-0.56
GO Biological Processes	GO:0010611	regulation of cardiac muscle hypertrophy	-2	FOXO1|IGF1|IL6ST|MEF2A|TNFRSF1A|TNFRSF1B|ERRFI1	-0.56
GO Biological Processes	GO:0032371	regulation of sterol transport	-2	ABCA1|CYP8B1|LRP1|NFKBIA|ABCB4|SREBF2|TTC39B	-0.56
GO Biological Processes	GO:0032374	regulation of cholesterol transport	-2	ABCA1|CYP8B1|LRP1|NFKBIA|ABCB4|SREBF2|TTC39B	-0.56
GO Biological Processes	GO:0061029	eyelid development in camera-type eye	-2	EGFR|JUN|SRF	-0.56
GO Biological Processes	GO:0043616	keratinocyte proliferation	-2	EREG|PPARD|FST	-0.56
GO Biological Processes	GO:0071421	manganese ion transmembrane transport	-2	SLC39A14|ATP2C1|ATP13A1	-0.56
GO Biological Processes	GO:0099188	postsynaptic cytoskeleton organization	-2	ACTB|ACTG1|WASF2	-0.56
GO Biological Processes	GO:0032000	positive regulation of fatty acid beta-oxidation	-2	AKT2|IRS2|PLIN5	-0.56
GO Biological Processes	GO:0090557	establishment of endothelial intestinal barrier	-2	TJP1|TJP2|RAPGEF2	-0.56
GO Biological Processes	GO:0014745	negative regulation of muscle adaptation	-2	FOXO1|NOS3|ERRFI1	-0.56
GO Biological Processes	GO:0060576	intestinal epithelial cell development	-2	HIF1A|IL6ST|C1GALT1	-0.56
GO Biological Processes	GO:0010942	positive regulation of cell death	-2	ABL1|APC|RHOB|ATF3|CAPN2|CDKN1A|CYLD|DAPK1|DUSP6|EGR1|EIF5A|FOXO1|FOXO3|GSK3B|HTT|HMOX1|NR4A1|INPP5D|JAK2|JUN|LRP1|MAP3K5|NF1|NOTCH2|PML|PRKCD|TNFRSF1A|TNFRSF1B|RAPGEF2|UBD|GADD45G|DDIT4|UBE2Z|ACER2	-0.56
GO Biological Processes	GO:0022409	positive regulation of cell-cell adhesion	-2	ACTB|ANK3|FOXO3|FLOT2|IGF1|IL6ST|JAK1|JAK2|SLC7A1|TGFBR2|TJP1|TYK2|VCAM1|ARID1A|PTPN23|ZMIZ1|ARID1B|ARID2|CCR2	-0.56
GO Cellular Components	GO:0005667	transcription regulator complex	-10	ARNTL|ZFHX3|ATF3|BCL9|CHD4|CREBBP|CREM|E2F5|EP300|EPAS1|FOXO3|FOSL2|NR5A2|HIF1A|HMGA1|NR4A1|RBPJ|JUN|SMAD1|MEF2A|MXI1|NFATC3|NFE2L2|NPAS2|RELB|ATXN7|SKI|SP1|STAT3|MED22|TBL1X|THRB|LIMD1|KLF4|CLOCK|NCOR2|HDAC4|NCOA2|SPEN|NCOA6|USP22|SIN3A|HIPK2|GATAD2A|AKIRIN2|ATF7IP|BDP1|GATAD2B|PHF12|MIER1|MIDEAS|BCL9L	-6.1
GO Cellular Components	GO:0000932	P-body	-6.4	ZFP36L1|TOP1|ZFP36|LIMD1|PUM1|CNOT1|TNRC6B|AGO2|RC3H2|SAMD4B|DCP1A|UBAP2|TNRC6C|RC3H1|PATL1|YTHDF3	-3.6
GO Cellular Components	GO:0035770	ribonucleoprotein granule	-5.5	ACTB|ARNTL|ZFP36L1|SHB|TOP1|ZFP36|SYMPK|IQGAP1|LIMD1|CLOCK|PUM1|UBAP2L|CNOT1|TNRC6B|PABPC1|AGO2|RC3H2|SAMD4B|DCP1A|UBAP2|ZNFX1|TNRC6C|FASTKD5|RC3H1|TUBB|PATL1|YTHDF3	-2.9
GO Cellular Components	GO:0017053	transcription repressor complex	-5.4	FOXO3|RBPJ|JUN|RELB|SKI|SP1|TBL1X|NCOR2|HDAC4|SPEN|SIN3A|AKIRIN2|PHF12|MIER1	-2.8
GO Cellular Components	GO:0036464	cytoplasmic ribonucleoprotein granule	-5.1	ACTB|ARNTL|ZFP36L1|SHB|TOP1|ZFP36|IQGAP1|LIMD1|CLOCK|PUM1|UBAP2L|CNOT1|TNRC6B|PABPC1|AGO2|RC3H2|SAMD4B|DCP1A|UBAP2|ZNFX1|TNRC6C|RC3H1|TUBB|PATL1|YTHDF3	-2.6
GO Cellular Components	GO:0005925	focal adhesion	-4.9	ACTB|ACTG1|ACTN4|RHOB|RND3|CAPN2|CBL|ADGRE5|DAB2|DAG1|EGFR|FLOT2|HMGA1|JAK1|JAK2|LRP1|MSN|MYH9|NEDD9|ABCB4|SDC4|SNTB1|TPM4|VCL|YWHAZ|ZYX|PPFIBP1|PPFIA1|SNAP23|IQGAP1|LIMD1|MAP4K4|SORBS1|TRIOBP|CLASP1|PABPC1|GIT1|PEAK1|SPRY4	-2.5
GO Cellular Components	GO:0030055	cell-substrate junction	-4.6	ACTB|ACTG1|ACTN4|RHOB|RND3|CAPN2|CBL|ADGRE5|DAB2|DAG1|EGFR|FLOT2|HMGA1|JAK1|JAK2|LRP1|MSN|MYH9|NEDD9|ABCB4|SDC4|SNTB1|TPM4|VCL|YWHAZ|ZYX|PPFIBP1|PPFIA1|SNAP23|IQGAP1|LIMD1|MAP4K4|SORBS1|TRIOBP|CLASP1|PABPC1|GIT1|PEAK1|SPRY4	-2.3
GO Cellular Components	GO:0016323	basolateral plasma membrane	-4.6	ANK3|ATP2B1|ATP7A|DAG1|EGFR|EPB41|STX2|FLOT2|LEPR|LRP1|MSN|MYO1D|PKD1|SLC7A1|SLC16A1|TGFA|TJP1|SLC23A2|WASF2|SLC39A14|SLC38A1|SLC16A10|SLC41A1	-2.2
GO Cellular Components	GO:0009925	basal plasma membrane	-4.4	ANK3|ATP2B1|ATP7A|DAG1|EGFR|EPB41|STX2|FLOT2|LEPR|LRP1|MSN|MYO1C|MYO1D|PKD1|SLC7A1|SLC16A1|TGFA|TJP1|SLC23A2|WASF2|SLC39A14|SLC38A1|SLC16A10|SLC41A1	-2.1
GO Cellular Components	GO:0045178	basal part of cell	-4.3	ANK3|ATP2B1|ATP7A|DAG1|EGFR|EPB41|STX2|FLOT2|LEPR|LRP1|MSN|MYO1C|MYO1D|PKD1|SLC7A1|SLC16A1|TGFA|TJP1|SLC23A2|WASF2|CLASP1|SLC39A14|SLC38A1|SLC16A10|SLC41A1	-2.1
GO Cellular Components	GO:0090575	RNA polymerase II transcription regulator complex	-4.3	ARNTL|ATF3|BCL9|CHD4|CREM|E2F5|FOSL2|NR5A2|HIF1A|HMGA1|JUN|SMAD1|MXI1|NFE2L2|NPAS2|ATXN7|STAT3|MED22|THRB|CLOCK|NCOA2|USP22|HIPK2|BCL9L	-2.1
GO Cellular Components	GO:0030139	endocytic vesicle	-4	ABCA1|ACTG1|AP2A1|ATP6V0A1|ATP7A|CHRM2|CSF3R|CYBB|EGFR|EREG|FLOT2|LRP1|LTF|MYO1C|NOS3|TGFA|ZYX|RAB7A|SNAP23|CD163|RAPGEF2|MTSS1|TGOLN2|ATG14|INPP5F|STX12|ZDHHC5|RIN3|UNC93B1	-1.9
GO Cellular Components	GO:0097513	myosin II filament	-4	MYH9|MYH10|MYH14	-1.8
GO Cellular Components	GO:0000118	histone deacetylase complex	-3.8	CHD4|TBL1X|ZNF217|HDAC4|SRCAP|SIN3A|KDM3B|GATAD2A|GATAD2B|PHF12|SAP130|MIDEAS	-1.7
GO Cellular Components	GO:0015629	actin cytoskeleton	-3.7	ABL1|ACTB|ACTG1|ACTN4|CAPN2|DAPK1|FGR|FLOT2|ARHGAP35|MYH9|MYH10|MYO1C|MYO1D|MYO9B|ABCB4|SH3GL1|SPTBN1|TJP1|TPM4|VCAM1|VCL|ZYX|GAS7|IQGAP1|NTN1|MTSS1|WDR1|WASF2|SORBS1|TRIOBP|AKAP13|SPECC1L|TMOD3|TMEM63B|MYH14|PEAK1|DYNLL2|RFLNB	-1.7
GO Cellular Components	GO:0045121	membrane raft	-3.6	ABCA1|ATP2B1|ATP7A|CAPN2|CBL|TPP1|DAG1|EGFR|FLOT2|HMOX1|IL6ST|INPP5D|INSR|JAK2|MYO1C|NOS3|ABCB4|PRKAR1A|SDC4|TGFBR2|TNFRSF1A|TNFRSF1B|SORBS1|FAIM2|STX12|TUBA1C|NFAM1|TUBB	-1.6
GO Cellular Components	GO:0098857	membrane microdomain	-3.6	ABCA1|ATP2B1|ATP7A|CAPN2|CBL|TPP1|DAG1|EGFR|FLOT2|HMOX1|IL6ST|INPP5D|INSR|JAK2|MYO1C|NOS3|ABCB4|PRKAR1A|SDC4|TGFBR2|TNFRSF1A|TNFRSF1B|SORBS1|FAIM2|STX12|TUBA1C|NFAM1|TUBB	-1.6
GO Cellular Components	GO:0030863	cortical cytoskeleton	-3.5	ACTB|ACTN4|CAPN2|EPB41|FLOT2|MYH9|NUMA1|SPTBN1|TPM4|IQGAP1|WDR1|AKAP13|ERC1|CLASP1	-1.6
GO Cellular Components	GO:0016605	PML body	-3.3	ARNTL|ELF4|PML|SKI|HIPK3|WDFY3|HIPK2|UBN1|TP53INP2|SENP2|HMBOX1|HIPK1|PATL1	-1.4
GO Cellular Components	GO:0098552	side of membrane	-3.1	ABCA1|AP2A1|ATP2B1|CAPN2|CDH5|CSF2RA|CSF3R|CYLD|DAG1|FGR|FOLR2|IL1R1|IL6ST|IL13RA1|INSR|LEPR|LY75|MAP3K5|MYH9|CTSA|PTPN1|SDC1|SNAP25|TFR2|TGFBR2|TGFBR3|VCAM1|WNT2|PTP4A1|IQGAP1|CD163|MTSS1|IGHV1-18|ERRFI1|SLC38A1|CCR2	-1.3
GO Cellular Components	GO:0009897	external side of plasma membrane	-3.1	ABCA1|CAPN2|CDH5|CSF2RA|CSF3R|DAG1|FOLR2|IL1R1|IL6ST|IL13RA1|INSR|LEPR|LY75|MAP3K5|SDC1|TFR2|TGFBR2|TGFBR3|VCAM1|WNT2|CD163|IGHV1-18|SLC38A1|CCR2	-1.2
GO Cellular Components	GO:0043296	apical junction complex	-3	ACTB|ACTG1|ANK3|APC|CDH5|STRN|TJP1|SYMPK|TJP2|TRAF4|RAPGEF2|SORBS1|UBN1|USP53|ASH1L	-1.2
GO Cellular Components	GO:1990513	CLOCK-BMAL transcription complex	-3	ARNTL|NPAS2|CLOCK	-1.2
GO Cellular Components	GO:0045335	phagocytic vesicle	-2.9	ABCA1|ACTG1|ATP6V0A1|ATP7A|CYBB|LTF|MYO1C|ZYX|RAB7A|SNAP23|ATG14|STX12|ZDHHC5|UNC93B1	-1.1
GO Cellular Components	GO:0031965	nuclear membrane	-2.9	ABL1|CDH5|EGFR|NR4A1|LBR|SMAD1|NUP98|RANBP2|TPR|NUP153|WDFY3|PLCB1|NUP62|ANKRD17|TOR1AIP1|INTS1|TMEM97|SENP2|CLMN|TNRC18|ITPRIP|DTX2|TBC1D20|POM121C	-1.1
GO Cellular Components	GO:0005911	cell-cell junction	-2.8	ACTB|ACTG1|ANK3|APC|CDH5|DAG1|FLOT2|MSN|MYH9|ABCB4|PRKCD|PTPRJ|STRN|TJP1|VCL|ZYX|SYMPK|SNAP23|IQGAP1|LIMD1|TJP2|TRAF4|RAPGEF2|WDR1|WASF2|SORBS1|SPECC1L|CTNNA3|TMOD3|UBN1|USP53|ASH1L|JCAD|CADM3|IGSF11	-1.1
GO Cellular Components	GO:0070603	SWI/SNF superfamily-type complex	-2.8	ACTB|CHD4|ARID1A|SMARCA5|BCL7B|SRCAP|INO80|GATAD2A|GATAD2B|ARID1B|ARID2	-1
GO Cellular Components	GO:0002102	podosome	-2.8	SH3GL1|TJP1|TPM4|VCAM1|VCL|WDR1	-1
GO Cellular Components	GO:0044615	nuclear pore nuclear basket	-2.7	NUP98|RANBP2|TPR|NUP153	-1
GO Cellular Components	GO:1990909	Wnt signalosome	-2.7	APC|GSK3B|WNT2|AXIN1	-1
GO Cellular Components	GO:0042405	nuclear inclusion body	-2.7	NUP98|RANBP2|TPR|NUP153	-1
GO Cellular Components	GO:0070160	tight junction	-2.7	ACTB|ANK3|APC|CDH5|STRN|TJP1|SYMPK|TJP2|TRAF4|RAPGEF2|UBN1|USP53|ASH1L	-1
GO Cellular Components	GO:1904949	ATPase complex	-2.6	ACTB|CHD4|ARID1A|SMARCA5|BCL7B|SRCAP|INO80|GATAD2A|GATAD2B|ARID1B|ARID2	-0.94
GO Cellular Components	GO:0005912	adherens junction	-2.6	ACTB|APC|CDH5|DAG1|FLOT2|MSN|MYH9|TJP1|VCL|ZYX|SNAP23|LIMD1|TJP2|SORBS1|CTNNA3|TMOD3|JCAD	-0.93
GO Cellular Components	GO:0016459	myosin complex	-2.5	MYH9|MYH10|MYO1C|MYO1D|MYO9B|MYH14|DYNLL2	-0.89
GO Cellular Components	GO:0030424	axon	-2.5	ABL1|ACTB|ACTG1|ANK3|ATP7A|BCR|C4A|CBL|DAG1|GSK3B|HTT|HIF1A|INSR|KIF5C|MAP1A|MAP1B|MBP|MYO1D|NF1|SNAP25|SPTBN1|TNFRSF1B|PPFIA1|IQGAP1|ZPR1|INPP5F|WDFY3|KIF1B|KIF13B|GIT1|NIN|SLC38A2|KIF21A|SEMA6A|DIP2B|MYH14|RIN3|CPEB4|SLC38A1|GDPD5|STX1B|FAM168B	-0.88
GO Cellular Components	GO:0005643	nuclear pore	-2.5	EIF5A|MYO1C|NUP98|RANBP2|TPR|MVP|NUP153|NUP62|SENP2|POM121C	-0.88
GO Cellular Components	GO:0001650	fibrillar center	-2.5	KLF6|DAB2|E2F5|NFIC|PAFAH1B2|RREB1|TOP1|TXNRD1|SMARCA5|TRAF4|UBD|AFF4|CC2D1A|CCR2	-0.87
GO Cellular Components	GO:0044304	main axon	-2.5	ANK3|DAG1|MAP1A|MAP1B|MBP|MYO1D|SPTBN1|TNFRSF1B	-0.86
GO Cellular Components	GO:0005938	cell cortex	-2.4	ACTB|ACTN4|AKT2|RHOB|RND3|CAPN2|EPB41|FLOT2|ITPR2|MYH9|MYH10|MYO1D|MYO9B|NEDD9|NUMA1|SPTBN1|TNFAIP2|TPM4|AXIN1|IQGAP1|WDR1|AKAP13|ERC1|CLASP1	-0.84
GO Cellular Components	GO:0034399	nuclear periphery	-2.4	ACTB|DAG1|ATN1|NUMA1|NUP98|PML|PRKCD|ATXN7|TPR|NCOR2|NUP153|SORBS1|PAXIP1|ARID2	-0.83
GO Cellular Components	GO:0005923	bicellular tight junction	-2.4	ANK3|APC|CDH5|STRN|TJP1|SYMPK|TJP2|TRAF4|RAPGEF2|UBN1|USP53|ASH1L	-0.83
GO Cellular Components	GO:0031252	cell leading edge	-2.4	ABL1|ACTB|AKT2|APC|ATP2B1|ATP7A|DAG1|EGFR|STX2|FGR|FLOT2|INSR|MYH9|MYH10|MYO1C|MYO1D|NEDD9|PTPRJ|S100B|SPTBN1|IQGAP1|MTSS1|WASF2|PSD3|PABPC1|GIT1|CTNNA3|PLCE1|JCAD|EPS8L2|SPRY4	-0.83
GO Cellular Components	GO:0072562	blood microparticle	-2.4	ACTB|ACTG1|SERPING1|C4A|F13A1|ITIH1|MSN|PZP|YWHAZ|ANGPTL4|ZBTB38	-0.8
GO Cellular Components	GO:0000407	phagophore assembly site	-2.4	RAB7A|ATG14|ATG2A|STX12|ILRUN|VMP1	-0.8
GO Cellular Components	GO:0031201	SNARE complex	-2.4	STX2|SNAP25|STX11|SNAP23|NAPA|STX12|STX1B	-0.79
GO Cellular Components	GO:0001726	ruffle	-2.3	ABL1|AKT2|APC|EGFR|FGR|MYH9|MYO1C|PTPRJ|S100B|IQGAP1|MTSS1|WASF2|PSD3|JCAD|EPS8L2|SPRY4	-0.71
GO Cellular Components	GO:0016234	inclusion body	-2.2	EEF2|FGR|HTT|NUP98|RANBP2|TPR|NUP153|UBD|WDFY3	-0.71
GO Cellular Components	GO:0043034	costamere	-2.2	ANK3|DAG1|SDC4|VCL	-0.71
GO Cellular Components	GO:0016328	lateral plasma membrane	-2.2	ANK3|APC|MYO1C|NUMA1|PKD1|SLC16A1|AXIN1|IQGAP1	-0.71
GO Cellular Components	GO:0000791	euchromatin	-2.2	JAK2|JUN|SP1|SUPT6H|KLF4|ELL2|AFF4	-0.68
GO Cellular Components	GO:0016514	SWI/SNF complex	-2.2	ACTB|ARID1A|BCL7B|ARID1B|ARID2	-0.66
GO Cellular Components	GO:0016600	flotillin complex	-2.1	CBL|FLOT2|SORBS1	-0.64
GO Cellular Components	GO:0014731	spectrin-associated cytoskeleton	-2.1	ANK3|EPB41|SPTBN1	-0.64
GO Cellular Components	GO:0140092	bBAF complex	-2.1	ACTB|ARID1A|ARID1B	-0.64
GO Cellular Components	GO:0030666	endocytic vesicle membrane	-2.1	AP2A1|ATP6V0A1|ATP7A|CHRM2|CSF3R|CYBB|EGFR|EREG|LRP1|NOS3|TGFA|RAB7A|SNAP23|CD163|TGOLN2	-0.59
GO Cellular Components	GO:0044666	MLL3/4 complex	-2	PAXIP1|NCOA6|KMT2C	-0.56
GO Molecular Functions	GO:0019900	kinase binding	-9.8	ABL1|ACTB|AP2A1|APC|RHOB|RND3|CBL|CDH5|CDKN1A|CRKL|CYLD|DUSP1|EEF2|EGFR|FGR|FOXO3|GSK3B|HTT|HIF1A|JAK2|SMAD1|MEF2A|MAP3K5|MSN|ND2|NEDD9|PER1|PKD1|PRKAR1A|PRKCD|PTPN1|PTPRJ|RELB|RPS6KA3|SDC4|SKI|STAT3|TGFBR2|TPR|YWHAZ|ZFP36|AXIN1|PPM1D|IRS2|IQGAP1|ZPR1|MAPKAPK2|TJP2|TRAF4|MICAL2|DAZAP2|GAB2|MVP|SH2B3|TOB1|TRIB1|TNIP1|KIF13B|PPP1R15A|PTPN23|NIN|PPME1|PRKAG3|ERRFI1|WWC3|WNK1|DUSP16|MIDN|STX1B|CCNYL1	-6.1
GO Molecular Functions	GO:0019901	protein kinase binding	-9.4	ABL1|ACTB|AP2A1|APC|RHOB|RND3|CBL|CDH5|CDKN1A|CRKL|CYLD|DUSP1|EEF2|FGR|FOXO3|GSK3B|HIF1A|JAK2|SMAD1|MEF2A|MAP3K5|MSN|ND2|NEDD9|PKD1|PRKAR1A|PRKCD|PTPN1|PTPRJ|RELB|RPS6KA3|SDC4|SKI|STAT3|TGFBR2|TPR|YWHAZ|ZFP36|AXIN1|PPM1D|IRS2|IQGAP1|ZPR1|MAPKAPK2|TJP2|TRAF4|MICAL2|DAZAP2|GAB2|MVP|SH2B3|TOB1|TRIB1|TNIP1|KIF13B|PPP1R15A|PTPN23|PPME1|PRKAG3|ERRFI1|WNK1|DUSP16|STX1B|CCNYL1	-5.9
GO Molecular Functions	GO:0008013	beta-catenin binding	-9.1	APC|BCL9|CDH5|DVL3|EP300|FOXO1|FOXO3|GSK3B|PTPRJ|RORA|TBL1X|VCL|AXIN1|KLF4|CARM1|CTNNA3|CDHR5|CALCOCO1|CHD8|BCL9L	-5.7
GO Molecular Functions	GO:0008134	transcription factor binding	-8.5	ACTB|ACTN4|ARNTL|CHD4|CREBBP|CREM|CRKL|EGR2|EP300|EPAS1|ETS2|FOXO3|NR5A2|GSK3B|HIF1A|HMGA1|NR4A1|RBPJ|JUN|MEF2A|NFIA|NFATC3|NFE2L2|NFKBIA|NOTCH2|PER1|PPARD|PROX1|RORA|SKI|SP1|SRF|STAT3|STRN|TBL1X|THRB|YWHAZ|ARID1A|OASL|KLF4|NCOR2|HDAC4|MED13|TRIB1|NCOA2|TOB2|SPEN|CNOT1|NCOA6|PPRC1|SIN3A|HIPK2|BCOR|YEATS2|BDP1|DHX33|PHF12	-5.2
GO Molecular Functions	GO:0061629	RNA polymerase II-specific DNA-binding transcription factor binding	-8.3	ACTB|ACTN4|ARNTL|CHD4|CREBBP|CRKL|EGR2|EP300|EPAS1|ETS2|GSK3B|HIF1A|HMGA1|NR4A1|RBPJ|JUN|MEF2A|NFE2L2|NFKBIA|NOTCH2|PPARD|PROX1|SP1|SRF|STAT3|STRN|ARID1A|OASL|KLF4|NCOR2|HDAC4|MED13|TRIB1|NCOA2|TOB2|SPEN|CNOT1|NCOA6|SIN3A|HIPK2	-5.1
GO Molecular Functions	GO:0140297	DNA-binding transcription factor binding	-8.2	ACTB|ACTN4|ARNTL|CHD4|CREBBP|CREM|CRKL|EGR2|EP300|EPAS1|ETS2|GSK3B|HIF1A|HMGA1|NR4A1|RBPJ|JUN|MEF2A|NFIA|NFE2L2|NFKBIA|NOTCH2|PER1|PPARD|PROX1|SKI|SP1|SRF|STAT3|STRN|TBL1X|YWHAZ|ARID1A|OASL|KLF4|NCOR2|HDAC4|MED13|TRIB1|NCOA2|TOB2|SPEN|CNOT1|NCOA6|SIN3A|HIPK2|BCOR|DHX33	-5
GO Molecular Functions	GO:0003682	chromatin binding	-7.9	ACTB|ACTN4|CHD4|CREBBP|EGFR|EGR1|EGR2|EP300|FOXO1|FOXO3|FOSL2|NR5A2|HMGA1|RBPJ|JUN|MEF2A|MITF|NFIA|NUP98|PER1|SRF|STAT3|SUPT6H|THRB|TOP1|TPR|ARID1A|BAP1|SMARCA5|KLF4|CDYL|CLOCK|NCOR2|NCOA2|SBNO2|NCOA6|ZNF609|BRD4|NUP62|SIN3A|ANKRD17|KMT5B|WAC|KDM3B|ASH1L|GATAD2B|ARID1B|CALCOCO1|CHD8|MCMBP|SVEP1|TNRC18|TADA2B	-4.8
GO Molecular Functions	GO:0003712	transcription coregulator activity	-7.2	ABL1|ACTN4|BCL9|CREBBP|ATN1|EP300|HMGA1|NUP98|PHF2|MED22|TBL1X|BTG2|NCOA4|ARID1A|LIMD1|CDYL|NCOR2|MED13|TOB1|CARM1|NCOA2|TOB2|SRCAP|SPEN|NCOA6|PPRC1|ZZEF1|USP22|MED13L|BRD4|SIN3A|HIPK2|KDM3B|BCOR|AKIRIN2|ATF7IP|ZMIZ1|ARID1B|PHF12|CALCOCO1|MIER1|KMT2C|LPIN3|HELZ2|MIDEAS|TADA2B|ZXDB|BCL9L	-4.2
GO Molecular Functions	GO:0051019	mitogen-activated protein kinase binding	-5.8	ABL1|DUSP1|PTPRJ|TPR|PPM1D|MAPKAPK2|MICAL2|TNIP1|DUSP16	-3.1
GO Molecular Functions	GO:0031490	chromatin DNA binding	-5.6	ACTB|ACTN4|CHD4|CREBBP|EP300|FOXO1|FOXO3|PER1|SRF|STAT3|THRB|CLOCK|SBNO2|KDM3B|GATAD2B	-3
GO Molecular Functions	GO:0003713	transcription coactivator activity	-5.5	ABL1|ACTN4|BCL9|CREBBP|EP300|HMGA1|NUP98|PHF2|NCOA4|ARID1A|MED13|CARM1|NCOA2|SRCAP|NCOA6|PPRC1|ZZEF1|USP22|BRD4|SIN3A|HIPK2|ZMIZ1|ARID1B|CALCOCO1|KMT2C|LPIN3|HELZ2|TADA2B|BCL9L	-2.9
GO Molecular Functions	GO:0001216	DNA-binding transcription activator activity	-5.3	ATF3|KLF6|E2F5|EGR1|EGR2|ELF1|ELF4|EPAS1|FOXO1|FOXO3|FOSL2|NR5A2|HIF1A|NR4A1|RBPJ|FOXK2|JUN|SMAD1|MEF2A|MITF|NFIA|NFATC3|NFE2L2|NFIC|NFKB2|REL|RREB1|SP1|SRF|STAT3|KLF4|CLOCK|PRDM4|ZNF574|GLIS3	-2.8
GO Molecular Functions	GO:0001228	DNA-binding transcription activator activity, RNA polymerase II-specific	-4.9	ATF3|KLF6|EGR1|EGR2|ELF1|ELF4|EPAS1|FOXO1|FOXO3|FOSL2|NR5A2|HIF1A|NR4A1|RBPJ|FOXK2|JUN|SMAD1|MEF2A|MITF|NFIA|NFATC3|NFE2L2|NFIC|NFKB2|REL|RREB1|SP1|SRF|STAT3|KLF4|CLOCK|PRDM4|ZNF574|GLIS3	-2.5
GO Molecular Functions	GO:0019904	protein domain specific binding	-4.8	ABL1|ARHGAP1|ATP2B1|CBL|DAG1|ATN1|EGR2|ETS2|HIF1A|INPP5D|INSR|JAK2|LBR|MAP3K5|MYH9|MYO1D|NFE2L2|NUMA1|PKD1|PRKAR1A|PROX1|SKI|SNTB1|SP1|STRN|TBL1X|TGFBR3|TOP1|YWHAZ|CCDC6|AXIN1|IRS2|IQGAP1|ARHGAP29|TJP2|TRAF4|RAPGEF2|DAZAP2|ELMO1|WASF2|NCOA2|CNOT1|ERC1|NUP62|SOCS7|NCKIPSD|ERRFI1|KIF21A|CALCOCO1|CHD8|TUBB|LNX2	-2.4
GO Molecular Functions	GO:0030374	nuclear receptor coactivator activity	-4.6	ACTN4|HMGA1|MED13|CARM1|NCOA2|NCOA6|PPRC1|USP22|ZMIZ1|CALCOCO1|HELZ2	-2.3
GO Molecular Functions	GO:0046332	SMAD binding	-4.5	ACVR1B|DAB2|JUN|SMAD1|MEF2A|PML|SKI|TGFBR2|TGFBR3|AXIN1|TOB1|HIPK2|ZMIZ1	-2.2
GO Molecular Functions	GO:0070016	armadillo repeat domain binding	-4.3	STRN|AXIN1|CNOT1|CALCOCO1|CHD8	-2.1
GO Molecular Functions	GO:0008330	protein tyrosine/threonine phosphatase activity	-4.3	DUSP1|DUSP5|DUSP6|DUSP8|DUSP16	-2.1
GO Molecular Functions	GO:0001221	transcription coregulator binding	-4.3	CHD4|CREBBP|EP300|EPAS1|FOXO3|NR5A2|HIF1A|HMGA1|NFE2L2|PER1|PPARD|RORA|SP1|THRB|PHF12	-2.1
GO Molecular Functions	GO:0019955	cytokine binding	-3.9	CSF1R|CSF2RA|CSF3R|IFNAR1|IL1R1|IL1RN|IL6ST|IL13RA1|LEPR|TGFBR2|TGFBR3|TNFRSF1A|TNFRSF1B|ZFP36|CCR2	-1.8
GO Molecular Functions	GO:0017017	MAP kinase tyrosine/serine/threonine phosphatase activity	-3.8	DUSP1|DUSP5|DUSP6|DUSP8|DUSP16	-1.8
GO Molecular Functions	GO:0003779	actin binding	-3.8	ABL1|ACTN4|DAG1|EGFR|EPB41|MAP1A|MAP1B|MSN|MYH9|MYH10|MYO1C|MYO1D|MYO9B|NOS3|SNTB1|SPTBN1|TPM4|VCL|GAS7|IQGAP1|BCL7B|MICAL2|PHACTR2|MTSS1|WDR1|WASF2|SORBS1|TRIOBP|CTNNA3|TMOD3|INO80|EPS8L2|MYH14|CLMN|SSH2	-1.7
GO Molecular Functions	GO:0005516	calmodulin binding	-3.7	ATP2B1|DAPK1|EPB41|MBP|MYH9|MYH10|MYO1C|MYO1D|MYO9B|NOS3|SNTB1|SPTBN1|STRN|TJP1|IQGAP1|MAPKAPK2|PLCB1|CAMSAP2|UBR4|MYH14	-1.7
[truncated: 115 more rows]
