# Supplementary material for: Sex differences in gene expression and alternative splicing in the Chinese horseshoe bat
Source: PeerJ. 2023 Apr 24;11:e15231. doi: 10.7717/peerj.15231 (PMC10135408; doi:10.7717/peerj.15231)
Supplement: Table S1 [file peerj-11-15231-s001.xlsx]

## Sheet: Sheet1
Tissue	Sample ID	Raw pair reads	Filtered pair reads	Overall alignment rate
Brain	180401	48015386	36285748	0.9821
	180402	48713310	36830202	0.982
	180403	49145224	36795292	0.9785
	180404	49983332	44371236	0.988
	180406	49730566	44596796	0.9837
	180409	49445388	36407846	0.9794
	180410	49650504	37262024	0.9828
	180411	49323686	44299952	0.9818
Liver	180401	50111490	37506546	0.976
	180402	43969420	32627120	0.9794
	180403	48298676	36267258	0.9755
	180404	49523742	44555438	0.9866
	180406	50007546	45199814	0.9857
	180409	47161462	35906674	0.9775
	180410	43706400	33096204	0.9772
	180411	50298098	45468800	0.9809
