# Supplementary material for: Sex differences in gene expression and alternative splicing in the Chinese horseshoe bat
Source: PeerJ. 2023 Apr 24;11:e15231. doi: 10.7717/peerj.15231 (PMC10135408; doi:10.7717/peerj.15231)
Supplement: Table S2 — BaseMean indicates the mean of normalized counts of all included samples. In the list of SBGs, positive and negative values indicate that genes are female-biased and male-biased, respectively. In the list of shared SBGs, 12 of them which have opposite expression patterns between the two tissues were shown in bold. [file peerj-11-15231-s002.xlsx]

## Sheet: specific-gene
Brain					Liver
Male-specific genes	baseMean	Female-specific genes	baseMean		Male-specific genes	baseMean	Female-specific genes	baseMean		Shared male-specific genes by brain and liver	Shared female-specific genes by brain and liver
KDM5D	1900.69	EEF1AS	82.5677		DDX3Y	1267.54	MUC5AC	567.765		KDM5D	ARHGAP15
DDX3Y	1555.33	MS4A15	79.5324		KDM5D	310.705	SPINK1	498.531		DDX3Y	B3GNT3
EIF1AY	310.461	CD52	68.6464		EIF1AY	286.637	TG	257.386		EIF1AY	BIRC5
KRT8	228.568	ASMT	46.2695		GDF15	223.002	HSD11B2	199.684		FABP2	BPIFC
ZG16	126.741	BPIFC	42.9126		MUC2	202.172	NR0B2	168.024		FABP6	CCDC180
KRT20	110.456	GYPA	42.5134		ZG16	162.873	IGLC1	132.817		GPRC5A	CDC20
KRT18	110.144	RHAG	42.4337		TRPV4	156.519	DEFB1	121.022		GVQW3	EBPL
FABP1	90.1541	KNL1	37.5736		KRT20	149.907	GLP1R	111.356		BPIFA1	EEF1AS
FABP2	56.9185	CD177	34.324		CTXND1	105.701	EEF1AS	105.011		CCL25	EIF4E1B
GVQW3	46.9857	HMGN2	32.7749		ACOD1	103.91	TPM	80.5741		CLCA4	ENV
GPRC5A	46.0312	MARCHF10	32.4863		FOSL1	80.741	CHST4	79.5567		KRT20	ERVPABLB-1
RBP2	44.2971	ENV	31.9937		RBP2	72.8251	CLEC3A	78.0985		MALL	FERMT1
MEP1B	42.0839	FAM111B	31.7218		FABP2	71.7777	B4GALNT2	70.1135		MEP1A	FOXL3
LGALS4	40.2855	SLC9A4	30.9304		LCN2	70.8882	ENV	70.0818		MEP1B	GTSF1
SLC15A1	39.365	TMEM238	30.9068		FOS	70.5808	GM1673	63.5795		MUC13	HEATR4
CLDN7	38.7321	MS4A7	30.6893		PVR	63.7824	BIRC5	62.312		MUC17	HMMR
RLN3	38.3446	SECTM1B	29.8391		COCH	62.6938	MT-ND3	61.8568		NLRC3	MTFR2
CDH17	36.6104	KIF20A	29.3432		HS3ST1	61.3233	MUC4	60.5051		PMEL	MT-ND3
ACTG2	36.5976	ELANE	29.2718		SLC15A1	60.7802	NOS2	59.3716		RBP2	PDZK1IP1
ENPEP	35.0642	TBX21	29.1709		WNT6	59.623	CCDC27	54.8154		REG4	PF4
REG4	32.3026	SLC25A21	28.865		GPR84	58.9667	MSMB	54.2538		SI	PLA2G5
SI	30.4496	CDCA2	28.7793		FGF23	52.5097	ZNF226	54.0675		SLC15A1	PLN
MSX2	29.4393	EXD1	28.5767		SLC4A11	49.6855	RTP4	52.1038		SPINK4	RAB19
PIGR	28.4942	BUB1B	28.0358		REG4	49.6139	ZNF521	49.1396		TFF2	SAG
MUC17	27.9969	TRIM10	28.001		IER3	44.1305	SLC34A1	48.5632		TFF3	SAMD15
SAA1	27.5819	PRTG	27.786		MOXD1	43.4953	CACNA1S	48.5603		TMPRSS15	SYT15
MALL	27.3316	GTSF1	27.5086		CXCL6	42.3016	C2ORF92	48.4228		ZG16	TMPRSS12
SLC5A1	27.06	EBPL	26.9879		TICAM1	41.8518	DYRK4	46.8989			TSPAN32
PTPRCAP	26.9811	ZC2HC1C	26.9772		GVQW3	41.4123	ADM2	44.5394			YBX2
MAT1A	26.964	TRDN	26.8021		PPFIA2	41.3039	SEMA3B	44.0588
PRG4	26.373	TTLL6	26.7184		PADI2	38.2239	ADRA2A	43.9791
EPHA2	25.7633	ZCCHC18	26.6878		CNTN1	37.9533	ANKRD37	43.921
DPP4	25.1972	CAPN13	26.1363		PDCL2	37.6	RTL8A	43.4311
CYP1A2	25.1429	TMPRSS5	25.4521		NRSN1	37.1736	ATL1	43.2106
SLC27A2	25.1355	EPB42	25.398		USP13	36.2712	HTR5A	43.1985
STRC	24.8656	TMEM235	25.1457		CCDC122	36.08	CLUL1	42.7239
MMCM3	24.848	KLHL6	24.8752		SLC6A1	35.3864	DSG3	41.6264
NPC1L1	24.2839	B3GNTL1	24.874		TFF3	35.1588	GAPT	41.52
CIDEC	24.2535	TRIM72	24.5544		NEFM	33.8017	WNT9A	41.1389
TSPAN8	23.9791	ERVPABLB-1	24.3406		SCD5	33.6844	TMEM125	41.0587
CCR10	23.9133	SP8	24.1319		SLC17A7	33.1776	IGHV3-23	40.6027
CYP1A1	22.9987	TAF7L	24.0962		IGHV1-46	32.2393	MSH5	40.4892
SPINK4	22.7479	TDRD9	24.0482		MEP1B	31.831	GCNT3	40.0128
TNNT3	22.4408	GHSR	23.8166		CLCA4	31.0688	DNAH11	39.8893
FZD10	22.3837	GSX2	23.8096		TFF2	31.0193	NCMAP	39.2475
TMPRSS15	21.833	NR2C2AP	23.7754		CRTAC1	30.809	IFITM5	39.0888
EME1	21.7607	CRB3	23.2724		SI	30.4254	HAUS1	38.4586
GBP7	21.7127	APOA2	23.2469		MREG	29.3192	COL9A2	37.9704
FIGLA	21.4877	TNN	23.2466		NCAM1	29.2597	ALDH3B2	37.9253
FAS	21.1782	FERMT1	23.0449		MUC17	28.5539	CA4	37.2036
JPH2	21.169	C12ORF45	23.0148		C16ORF46	28.4563	DYNAP	37.0942
EREG	21.167	KIF14	23.0079		NR4A2	28.1671	NDST4	36.6807
FCGR3	21.1541	COL6A4	23.0068		ARRDC4	27.5359	HECW1	36.0956
AMDHD1	20.8723	SBSN	22.7827		GPRC5A	27.5034	SPATC1L	35.8423
PTGES	20.8629	DGKK	22.7693		PMEL	27.4592	SP140L	35.669
RAB38	20.8539	SAG	22.4716		CHL1	27.2167	MYMX	35.0299
PROC	20.8407	FCMR	22.4646		CADPS	25.7506	ZNF365	34.3906
AZGP1	20.8273	ALDH3A1	22.2876		GTF2IRD1	25.2528	ZNF419	34.1241
TFF3	20.6159	CDC25C	22.244		FABP6	24.6841	NEURL1	33.926
CHRNE	20.5509	NFE2	21.9678		SPINK4	24.6588	ZNF684	33.8175
DUSP13	20.541	TGM5	21.6809		ARMH4	24.5509	NRTN	33.7791
UPK3B	20.5402	ANKK1	21.4879		GNAO1	24.5108	TMPRSS2	33.6657
MUC13	20.283	CFAP300	21.4386		SCN2A	23.2332	TRMT61B	33.6098
TFF2	20.0005	E2F2	21.4181		NEFH	23.0179	MOGAT1	33.4987
CCL25	19.9586	OSGIN2	21.1943		SV2B	22.9803	CTRB1	33.1725
FOXA1	19.9293	SELL	21.1549		NSG1	22.8788	FAM228B	32.4844
MPL	19.6443	SYT15	21.1393		MALL	22.8003	SYTL1	32.2879
IL21R	19.6087	PRG3	21.1054		CGAS	22.761	FAM3B	32.1606
VNN1	19.3101	TMPRSS12	20.9246		ZNF500	22.7123	EBPL	32.1082
TM4SF18	19.2938	ENO4	20.8868		TH	22.2897	TM4SF20	31.8358
ACER1	19.018	ADCY10	20.6425		SLC22A1	22.1641	DEGS2	31.5743
SPDYA	19.0078	QPRT	20.634		NFASC	21.9136	SLC51B	31.3372
HAL	19.0028	OR2A25	20.5955		RRAD	21.8904	SLC2A11	30.7781
CLCA4	18.7677	PDE6C	20.317		SYCP2	21.8678	COPRS	30.4119
NLRC3	18.7226	SGCG	20.1329		SLC6A17	21.7454	CEP72	29.7476
BPIFA1	18.6821	CCL19	20.1038		PEG10	21.6415	ACT2	29.6526
BDKRB2	18.4058	CSPRS	20.0723		TBX19	21.6091	CRACR2A	29.461
FCRL6	18.3948	TROAP	20.0675		NTRK3	21.5241	TRMT2B	29.4551
STEAP4	18.3862	GPR152	20.0521		SEPTIN5	21.5121	TTC12	29.3796
F13B	18.3842	EIF4E1B	19.8415		GRIN1	21.5059	LAD1	29.1517
FABP6	18.1543	ASPN	19.8063		SLC25A35	21.4565	WDSUB1	29.1187
SLC5A12	18.1065	VSX2	19.6106		TFPI	21.3877	MT3	28.6967
PGAM2	18.0985	AXDND1	19.5897		ADAMTS12	21.3754	MGAT3	28.6176
UROC1	18.0857	MT-ND3	19.5795		STMN2	21.3656	SAG	28.4727
ZNF264	18.0827	TRIM38	19.5658		P2RY8	21.3152	TLR8	28.0784
XIRP2	17.8369	LRRC17	19.5624		SLC4A10	21.3037	ZNF343	27.9755
FOLR1	17.8235	TMPRSS3	19.5282		TMEM59L	21.0209	AOX4	27.7725
AQP9	17.7769	ITGAD	19.3118		TMPRSS15	20.9159	RHNO1	27.7057
IL1RN	17.7746	ARHGAP36	19.286		GLI2	20.8227	CCDC181	27.4273
MYO1A	17.5213	DNAJB13	19.0532		BPIFA1	20.7944	BCO2	27.3686
TNNI2	17.5115	PEX11G	19.0386		ANGPT2	20.6949	PSRC1	27.3308
LRRC3	17.4882	FAM83G	19.0371		MUC13	20.6277	TNNC1	27.3057
GBP1	17.4768	STEAP1	19.0339		IL1R2	20.5228	SUSD4	26.9897
P2RX3	17.4746	LRRC36	18.8066		PHGDH	20.4672	ZNF23	26.8845
ABCC2	17.4723	NPVF	18.7614		BDMD1	20.4178	C15ORF40	26.8587
PROCR	17.4718	IRS4	18.7533		NRXN1	20.2358	EFCAB7	26.8302
PRDM6	17.4709	PRTN3	18.7134		NPTXR	20.1911	AHSP	26.8129
HOXB9	17.4353	SEC16B	18.5356		SYN1	20.1609	CLDN15	26.6638
OR5K1	17.4323	IL7R	18.5333		MSX1	20.0809	ZFP62	26.5357
SMIM24	17.2302	MEI4	18.5097		TMEM130	20.0615	IL15	26.4808
L3MBTL4	17.1668	CDC20	18.5071		SNAP91	20.0422	SPEG	26.387
OVOL1	17.1667	RGS22	18.5068		RSPO2	19.9082	DLEC1	26.2897
TM6SF2	16.9004	TMEM61	18.4841		PLB1	19.7193	RAB19	26.0734
COX6A2	16.8789	OIP5	18.2712		MYO3A	19.3492	PDILT	26.0403
DKKL1	16.8657	VILL	18.2416		TMEM54	19.2218	EFCAB5	25.8317
SLC9C1	16.8526	FBXO5	18.238		PADI4	19.1813	TBC1D19	25.8247
MEP1A	16.6072	RAB19	18.1564		SLC12A5	19.1543	ZNF649	25.4579
C2CD4A	16.5752	ALDH1A3	17.9685		GABBR2	19.0782	NLRP6	25.4351
ABCC3	16.5712	HOGA1	17.7169		LRRN3	19.0734	JPH2	25.4298
PMEL	16.5601	FOXL3	17.6543		DUSP18	19.0651	CFTR	25.3805
PRRG4	16.5566	FAM229B	17.4777		SPOCK1	19.0541	CFAP43	25.1742
AOC1	16.2963	CACNA2D4	17.4725		CALN1	18.9453	SPA17	25.0039
CCDC60	16.2566	C2CD6	17.4668		PDZD9	18.8959	RHPN1	25.0013
RIPPLY3	16.2425	NRN1L	17.4652		SRGAP3	18.7468	VWA3A	24.7297
OC90	15.9617	OTOP2	17.4639		SEZ6L	18.7165	TRIM66	24.6425
SLC44A4	15.6771	PADI4	17.4535		SYT4	18.7021	PDE6G	24.6041
NMUR1	15.6714	PLA2G5	17.4418		ZFPM2	18.6997	SPC24	24.468
MARCO	15.6609	RHCG	17.4337		KBTBD6	18.66	PLGRKT	24.4304
TGM1	15.635	LRP2BP	17.4336		MAMLD1	18.6126	TNNT2	24.3331
SLC15A3	15.3384	ADAMTS16	17.4334		HEBP2	18.5147	TM4SF18	24.3309
MAB21L4	15.3316	PF4	17.2006		CALHM5	18.4431	P3H4	24.198
LPIN3	15.0413	KIF23	17.1906		PRICKLE2	18.4362	FFAR4	24.1832
TRDC	15.041	PDZK1IP1	17.1825		PPP2R2C	18.4335	HEATR4	24.1466
HLX	15.0355	ALX3	16.9308		PHYHIP	18.4263	NME9	24.1017
EZHIP	15.0277	CCDC33	16.9284		POU4F2	18.4212	B3GNT3	23.9303
CCR9	15.0257	HEATR4	16.9104		TUBB3	18.331	NMES1	23.8463
PIFO	15.0219	B3GNT3	16.6648		CORO2B	18.303	IGSF9B	23.8219
IL2RG	15.0158	RAB7	16.6633		AK1	18.216	G2E3	23.7489
DRGX	15.0094	EGFL6	16.6615		CNTN5	18.0319	CACNG8	23.7074
KLK1	15.0052	NRL	16.6565		SHANK1	18.0197	TLE2	23.5682
REM1	14.7345	ODAD4	16.6531		MELK	17.961	DTD1	23.5285
PHF11	14.7217	SETSIP	16.6518		FAM160A1	17.8845	PNMA8A	23.4639
FAM162B	14.7189	TMEM232	16.651		LHFPL2	17.8531	ADORA1	23.2429
		PLN	16.6499		GIMAP5	17.8437	ATG10	23.2291
		KRT80	16.6352		BCL11B	17.7939	CARMIL3	23.1625
		SHCBP1	16.6347		UNC13A	17.6919	GFRA4	23.1318
		CACNA1F	16.6137		POU2F2	17.5784	HES6	22.9301
		DMKN	16.4099		NMNAT2	17.5106	MAPK11	22.8087
		NLRP10	16.4043		MPZ	17.4852	RFLNA	22.7909
		SAL1	16.3908		AK4	17.4659	KL	22.736
		CHIT1	16.3866		MTHFD2	17.4079	MTMR11	22.6799
		KMO	16.3818		INA	17.2904	F8A1	22.6489
		RASSF9	16.1497		SPHK1	17.2774	HCST	22.646
		PRLHR	16.147		KCNA2	17.2421	STPG1	22.5492
		TMEM221	16.1437		SATB2	17.1456	TEX22	22.4697
		CTSW	16.1426		CCL25	16.9863	AATK	22.409
		SH3BGR	16.1425		GNG4	16.9199	PDZK1IP1	22.3968
		PYDC1	16.1328		NID2	16.8635	TMEM198	22.206
		SAMD15	16.1221		MYH1	16.7955	ZNF569	22.2013
		YBX2	16.122		SLC24A5	16.7366	CD101	22.0255
		C1ORF94	16.116		HK3	16.7254	PRKCG	21.9377
		GPR84	16.1084		RUNDC3A	16.7243	SERPINB7	21.844
		SOWAHD	15.8803		CERS4	16.616	LSM8	21.7029
		KLHL41	15.8754		SCG2	16.5454	MAMDC2	21.5979
		ANKDD1B	15.8612		HECTD2	16.463	SLC5A10	21.4993
		EGF	15.8571		ARMCX2	16.3421	PAQR5	21.476
		BIRC5	15.8552		ATP8A2	16.3394	RAD1	21.1646
		PPP1R3G	15.8519		SGO2	16.2757	IQANK1	21.0455
		TAL2	15.823		OPHN1	16.2178	TOMM5	20.9231
		COL6A5	15.6336		MIS18BP1	16.2142	COL4A3	20.8646
		TSPAN32	15.619		SOX8	16.1403	SCEL	20.8302
		CLRN2	15.6176		PTPRR	16.0984	CDX4	20.8288
		GSDMA	15.6146		PTGER3	16.0965	CCDC17	20.8216
		DUOXA1	15.6054		RUNX3	16.092	ART4	20.7376
		LIPM	15.6042		ZIC1	16.082	YBX2	20.7351
		SPATA45	15.5933		TTC9	16.0179	KIF15	20.6919
		NMS	15.5066		FBXL16	15.9962	MSI1	20.6269
		DUOX1	15.3664		NLRC3	15.9809	PCNX2	20.6006
		STRA8	15.3392		SYP	15.8884	TFCP2L1	20.4883
		PLEKHG4	15.3306		MAP3K12	15.8632	ASB16	20.4657
		COL11A2	15.3287		SRCIN1	15.8086	ERVPABLB-1	20.4477
		CDA	15.328		SERPINB2	15.8005	IGLV6-57	20.3999
		ESPL1	15.3159		AGR2	15.7698	SLC25A33	20.3868
		KIF18B	15.3152		DCLK3	15.5534	NFKBID	20.3289
		DNAH8	15.1229		MEP1A	15.5229	SCGB3A1	20.2214
		KLHL30	15.1156		ENPP7	15.5217	MELTF	20.2117
		HAO2	15.09		PLET1	15.4958	PF4	20.1518
		CCDC89	15.0807		DIO2	15.4753	LRRIQ4	20.1109
		CD244	15.079		PAIP2B	15.4751	WDR97	20.0409
		FBP1	15.0773		ORAI2	15.47	FBLN7	20.0177
		MAB21L3	14.8197		RPL3L	15.3539	PLN	19.9754
		CCDC42	14.8178		ZIC2	15.3477	WNT7B	19.888
		ARHGAP15	14.8107		RBFOX1	15.3271	PARP11	19.8367
		ASB5	14.8104		VAMP1	15.2427	REPS2	19.8255
		IL18	14.8031		NRXN2	15.2389	SYT15	19.8138
		RETN	14.7855		CD40	15.2196	SLC24A3	19.8033
		MYO15A	14.5665		MAPK10	15.2111	ELMOD1	19.7195
		MTFR2	14.5601		SYT13	15.1857	TRIP13	19.6455
		SPIN2B	14.5549		OIP5	15.1183	CXORF58	19.6448
		RASAL3	14.5445		OLFM4	15.0951	FBXL21	19.6294
		CENPU	14.5412		ANKFN1	15.0458	PLCD3	19.5593
		GLYATL3	14.5342		CD6	15.0421	ZNF613	19.5405
		STAG3	14.5282		FAT2	15.0223	MUC20	19.47
		METTL27	14.3095		ALDH1A2	15.0192	SDK1	19.3378
		MDFIC2	14.2856		KCNS3	14.8883	ZNF470	19.2572
		EXO1	14.2832		CRMP1	14.8869	TRDMT1	19.2449
		ABCA12	14.2705		CELF4	14.8579	ALPK2	19.2263
		TFPI2	14.0441		SLC6A19	14.8357	USH1C	19.1696
		GSG1	14.0333		GPA33	14.7849	ARL6	19.1627
		OR51E2	14.0281		CARD11	14.7143	TMEM240	19.1372
		FOXA3	14.0177		KCNC4	14.6839	COL17A1	19.1231
		TNFRSF18	14.0147		ADGRE4	14.6693	MYBPC2	19.1115
		PIK3R6	13.996		PANX2	14.651	NEU3	19.0845
		TRIM14	13.9956		CNR1	14.6401	PRKD1	18.9909
		SLC22A31	13.9939		CPO	14.6327	GPR15	18.9256
		FGF20	13.9827		MAPK4	14.6184	ZNF568	18.9159
		MUC15	13.7768		ADAMTSL1	14.5509	GLIPR1	18.907
		CD300LG	13.76		SOWAHA	14.5459	NEMP2	18.7676
		DHH	13.7458		DCLK2	14.4612	MED12L	18.7643
		SPINK5	13.7373		ACSL6	14.4477	DISP2	18.7555
		SNORC	13.7325		GPER1	14.4129	ANKRD55	18.7011
		DDX60	13.7245		MAPT	14.3957	FOXL3	18.6697
		SLFN14	13.5207		MID2	14.395	ZNF697	18.6045
		MYOZ3	13.5153		CCR1	14.3815	SPATA6L	18.5858
		SLC2A4	13.5132		QRFPR	14.362	INAVA	18.5631
		CCDC180	13.5001		TSPAN11	14.3587	ZNF564	18.5572
		MORN5	13.4993		PROB1	14.3184	MMP15	18.5314
		FGF18	13.4921		LAMC2	14.2633	KIF19	18.4153
		ERFL	13.4912		CYS1	14.2615	MYOM1	18.354
		COX6B2	13.4912		CD244	14.2579	EIF4E1B	18.3157
		SHBG	13.4861		FBXO2	14.235	VMN2R116	18.2903
		ATP6V0D2	13.4758		BTBD11	14.1941	IGLV10-54	18.2828
		FHL5	13.4739		UCHL1	14.1685	HMMR	18.2293
		PFKFB1	13.4634		GZMK	14.1552	ARHGAP15	18.1784
		LCN15	13.2634		MARK1	14.1371	ALOX5AP	18.1758
		SNX20	13.2394		PRR7	14.1154	SLC6A7	18.1588
		C1QTNF7	13.2338		CENPJ	14.0431	AK9	18.1579
		IKZF3	13.2197		AOAH	13.9836	SEMA4F	18.1363
		MGST2	13.2063		PANX1	13.9522	TYMS	18.1221
		HMMR	13.2052		GSDME	13.9256	MBOAT1	18.0741
		CXCL10	13.1907				BPIFC	18.0491
		TFEC	13.1895				RTKN2	18.0332
							SVBP	18.0175
							LMOD1	17.9676
							IFT27	17.9115
							CNN1	17.8719
							CYSLTR1	17.8089
							BAIAP3	17.7704
							RAB34	17.7583
							KRTAP29-1	17.7509
							AFP	17.7479
							TRABD2B	17.7323
							FAM187B	17.6709
							TYRO3	17.668
							IGKV1-39	17.5597
							DIXDC1	17.533
							FAAP100	17.5065
							T-ENOL	17.4976
							CLEC3B	17.4839
							IHH	17.4464
							CLRN3	17.4258
							ARL11	17.4082
							SASS6	17.4051
							FRZB	17.3232
							TAF1B	17.2852
							BDKRB2	17.28
							POLR3G	17.2427
							FREM1	17.2393
							ERVK-25	17.221
							WDR31	17.2001
							ATP6AP1L	17.1842
							SPAG5	17.1502
							FAM78B	17.1464
							HIDE1	17.1008
							TMCC2	17.086
							DUSP4	17.062
							SPDL1	17.0179
							RSPH3	17.01
							ZDHHC11B	16.9845
							CCDC92	16.9275
							KLRF2	16.873
							ZNF584	16.8053
							HRC	16.7336
							DEF6	16.6934
							OSR1	16.6781
							GTSF1	16.6747
							SH2D1B	16.6527
							KLHDC9	16.6228
							PWWP2B	16.6021
							KLC3	16.5971
							MST1R	16.5436
							TTBK1	16.5421
							GABRA3	16.5311
							DDX25	16.5013
							DNHD1	16.4391
							CPI17	16.4174
							C11ORF95	16.3845
							STAT4	16.317
							CALHM2	16.3133
							SHC2	16.3072
							NEU4	16.3027
							ARL14	16.2809
							PATL2	16.2401
							CCDC180	16.2246
							CCDC81	16.2242
							COX4I2	16.2011
							TICRR	16.1651
							KRT7	16.1647
							ZAP70	16.1562
							PLA2G4B	16.1196
							PRSS53	16.1165
							BMX	16.0906
							EFHC1	16.0672
							KHDRBS3	16.0538
							FEZ1	16.0384
							DAGLA	16.003
							EFNA5	15.9946
							LMNTD1	15.9936
							ZNF624	15.9686
							GPSM1	15.9549
							ZNF75A	15.9488
							SHD	15.932
							RNF32	15.8752
							SPC25	15.8529
							CCDC191	15.8125
							JSRP1	15.8121
							HEPH	15.8043
							S100A15A	15.7481
							ZNF541	15.7318
							KCNAB1	15.714
							TMEM26	15.665
							ZNF227	15.6614
							NUF2	15.6434
							ADAM11	15.5759
							UCP1	15.5754
							NTN4	15.5428
							PRR36	15.5349
							CCDC121	15.5162
							ZNF567	15.5006
							NLRP5	15.4645
							CLNK	15.3653
							ZBTB32	15.3588
							EPHB3	15.3399
							LRP8	15.3303
							IGLV5-39	15.2832
							KIRREL3	15.216
							CDC20	15.2028
							IGLV7-46	15.1905
							GASK1A	15.1795
							IL13RA2	15.1524
							MLLT3	15.1018
							COL7A1	15.0942
							SYCE1	15.0686
							RNF207	15.0613
							SH2D3A	15.0535
							FER1L5	15.0174
							SLC12A8	14.9733
							MTUS2	14.9411
							RGS12	14.9325
							ITGA2B	14.8241
							HACD1	14.8191
							TPX2	14.8179
							CENPE	14.7917
							RASA4B	14.7898
							LITAFD	14.7833
							EEPD1	14.7783
							COL21A1	14.776
							ZBED5	14.7757
							DNAI4	14.771
							MTFR2	14.7608
							IQSEC3	14.6928
							SKP2	14.674
							PBK	14.6561
							TREML1	14.6185
							SLAMF7	14.5947
							SLITRK2	14.5567
							IGLV1-50	14.5479
							ZNF345	14.5461
							PALM3	14.5307
							FRAS1	14.4471
							PLA2G5	14.4267
							DPT	14.4207
							TUBB2B	14.4205
							NAV3	14.4198
							SGSM2	14.3855
							ZNF826P	14.3554
							MTHFD2L	14.2965
							SYTL3	14.2597
							CENPM	14.1119
							STYXL1	14.0339
							SLC4A3	14.0304
							NEU2	14.0098
							PDLIM3	14.0063
							ZNF34	14.0052
							EPS8L3	14.0004
							RTP3	13.9867
							NREP	13.9622
							TRAT1	13.9539
							TSPAN32	13.9229
							SIM2	13.9177
							HJURP	13.891
							IL27RA	13.8832
							KCNMB1	13.828
							ATP10A	13.7972
							MNS1	13.7917
							MEIS3	13.7585
							WFDC1	13.7239
							FLT3	13.707
							CD3G	13.6937
							DIAPH2-AS1	13.6785
							SERPINA9	13.6619
							SMOC2	13.6146
							ZDHHC23	13.6127
							IGLV9-49	13.6037
							RSPH9	13.5941
							CNTN2	13.5928
							TSHZ3	13.5857
							GABRE	13.5529
							FPGT	13.5432
							SAMD15	13.5308
							TIGIT	13.5236
							DNPH1	13.4633
							ZNF286A	13.4439
							LRRK2	13.4431
							CCDC9B	13.3988
							XPNPEP2	13.3925
							GNB5	13.3574
							TRAF5	13.3418
							FMN1	13.3339
							IL10	13.3156
							NUDT18	13.3005
							DCK	13.2941
							GRK1	13.2786
							FERMT1	13.2646
							IGH-1A	13.2551
							FABP5	13.2511
							NSG2	13.2237
							SLC6A20	13.2028
							TRIM63	13.1952
							UPK1B	13.1887
							SCT	13.1774
							ARHGAP22	13.1222
							ZWILCH	13.1113
							GRM1	13.1089
							CCDC85A	13.0747
							DSC1	13.0719
							PCMTD2	13.059
							CCDC175	13.0536
							ERICH4	13.008
							CA9	12.9688
							FBXO44	12.9684
							SH3YL1	12.9625
							TESC	12.902
							CDCA8	12.8914
							PRSS21	12.8673
							SOX17	12.8029
							EFNA3	12.7151
							NFATC4	12.6021
							IL18R1	12.5913
							GRAP2	12.5804
							TMEM169	12.5567
							XKR6	12.5377
							CCL11	12.503
							HSD3B	12.4105
							TMPRSS12	12.3804
							PRRG3	12.3794
							GPR183	12.2444
							SPESP1	12.1946

## Sheet: Brain-sex-biased genes
Gene name	sampleA	sampleB	baseMeanA	baseMeanB	baseMean	log2FoldChange	padj
MYL6	female	male	161.136	18.6923	100.088	3.10771	5.08966e-26
TPM	female	male	231.82	41.7038	150.342	2.47494	3.42141e-09
HBB	female	male	19345	3922.68	12735.4	2.30204	0.0356375
ATP5MD	female	male	1422.23	292.297	937.973	2.28258	7.5213e-70
S100A8	female	male	92.4001	19.9224	61.3382	2.21362	0.000438392
RPS28	female	male	1337.63	311.026	897.658	2.10457	8.26802e-40
SLC4A1	female	male	210.308	54.275	143.437	1.95428	5.79941e-05
COL2A1	female	male	82.319	21.7698	56.3693	1.91952	2.48713e-07
ATP5ME	female	male	902.641	239.896	618.608	1.91164	4.64482e-29
RPL22L1	female	male	492.486	131.128	337.618	1.90904	3.20086e-38
HSPB11	female	male	126.888	34.6362	87.3512	1.87342	7.84473e-11
SPTA1	female	male	89.0113	24.8307	61.5053	1.84197	0.00290822
TOMM7	female	male	671.151	188.934	464.487	1.8286	5.88726e-19
RRM2	female	male	51.6726	14.7089	35.831	1.8127	0.00288774
PCBD2	female	male	131.965	37.7059	91.5684	1.80748	5.59435e-10
IL17D	female	male	154.979	47.4795	108.908	1.70653	1.91102e-11
FNDC10	female	male	105.405	32.4355	74.1322	1.69988	7.12831e-05
MRPS14	female	male	360.069	114	254.611	1.65929	2.41284e-25
GLRX2	female	male	377.455	120.133	267.174	1.65157	8.69744e-13
RPS21	female	male	565.566	183.824	401.963	1.62128	2.3246e-19
NME7	female	male	4082.72	1337.03	2906	1.61051	4.64482e-29
RPS23	female	male	2498.28	818.308	1778.29	1.61019	1.72808e-25
NDUFA3	female	male	524.448	171.901	373.356	1.60918	3.67539e-22
LINC01551	female	male	163.398	53.6207	116.35	1.6076	6.3875e-10
ADIRF	female	male	103.688	34.9502	74.2288	1.56891	1.4604e-05
UBC	female	male	2460.61	830.402	1761.95	1.56712	0.000110508
SMIM18	female	male	248.506	85.1449	178.494	1.54511	1.67017e-11
SNRPD2	female	male	425.513	147.407	306.325	1.52945	6.46086e-23
RPS27A	female	male	1948.41	681.855	1405.6	1.51477	1.52203e-54
F8A1	female	male	96.9517	34.6314	70.243	1.485	0.013898
PLGRKT	female	male	47.9677	17.1721	34.7696	1.48232	0.00148477
CEP192	female	male	194.052	69.558	140.697	1.48029	6.5199e-08
TEFM	female	male	156.883	57.0109	114.081	1.46047	1.21231e-09
SEC61G	female	male	442.119	163.324	322.635	1.43663	2.93124e-16
CYP1A5	female	male	64.9789	24.2292	47.5148	1.42336	0.00631988
ABCA13	female	male	38.6918	14.7055	28.4119	1.39554	0.0228161
MAGOHB	female	male	265.222	100.832	194.769	1.39532	3.57675e-11
AHSP	female	male	90.4289	34.6503	66.5238	1.38398	0.00857706
TNNT2	female	male	193.278	74.2205	142.254	1.38112	1.31677e-05
RPL37A	female	male	2526.03	974.18	1860.95	1.37462	4.76511e-30
FAM221B	female	male	39.2064	15.3174	28.9682	1.35584	0.0190966
KDF1	female	male	253.58	99.2844	187.453	1.35279	4.0947e-08
AIF1	female	male	45.7895	18.0769	33.9127	1.34102	0.0267249
C21ORF62	female	male	174.506	68.8847	129.24	1.34064	4.49686e-05
UQCRQ	female	male	440.895	174.303	326.641	1.33871	3.54466e-17
CIRBP	female	male	5438.6	2166.77	4036.39	1.3277	4.65991e-13
PLAG1	female	male	118.984	48.1211	88.6142	1.30611	4.82706e-07
RPS29	female	male	1186.89	482.557	885.031	1.29838	1.42382e-14
COX7B	female	male	2715.74	1110.33	2027.71	1.29035	1.30935e-23
TAFA4	female	male	53.8344	22.0687	40.2205	1.28647	0.0412168
COL5A3	female	male	475.533	197.47	356.363	1.2679	9.37341e-06
RNF187	female	male	1015.39	422.227	761.178	1.26592	8.32724e-23
NDUFA1	female	male	377.461	157.817	283.328	1.25815	2.28262e-14
MRPL33	female	male	156.777	65.5699	117.688	1.25766	6.57041e-05
RBM20	female	male	37.1748	15.6151	27.9349	1.25048	0.0355944
RIPPLY2	female	male	179.34	75.9754	135.041	1.23904	6.20009e-07
FMC1	female	male	141.301	60.6732	106.746	1.21947	9.2774e-07
SSR4	female	male	293.181	125.961	221.515	1.21877	2.13206e-09
COL5A1	female	male	1488.66	642.493	1126.01	1.21221	1.06404e-10
NDUFC2	female	male	806.396	348.045	609.96	1.21212	1.32426e-24
TRO	female	male	83.4285	36.1547	63.1683	1.20638	0.020918
ANKS4B	female	male	63.0626	27.5759	47.854	1.19331	0.00166977
HYPK	female	male	671.363	295.393	510.233	1.18452	7.71423e-14
SFXN2	female	male	157.931	69.5189	120.04	1.18357	1.65955e-05
S100A4	female	male	68.8998	30.336	52.3725	1.18343	0.00898737
CCDC78	female	male	131.152	57.8684	99.7448	1.17999	0.00652606
RIBC2	female	male	55.3948	24.5032	42.1555	1.17642	0.00342335
ACADL	female	male	42.8942	19.0024	32.6548	1.17491	0.0167169
MICOS10	female	male	602.266	268.713	459.315	1.16431	2.22685e-08
NDUFA2	female	male	739.61	330.341	564.209	1.16277	2.49411e-08
SLIRP	female	male	228.628	102.367	174.516	1.15938	2.11007e-09
RPL32	female	male	2161.39	968.72	1650.25	1.15781	1.32746e-21
DYNLT2	female	male	79.301	35.5384	60.5456	1.15761	0.00213574
C12ORF40	female	male	60.1787	26.9849	45.9528	1.15721	0.0386793
TTF2	female	male	46.3583	20.8252	35.4155	1.15425	0.00984849
COL24A1	female	male	236.471	106.308	180.687	1.15344	1.10085e-05
CEBPZOS	female	male	232.724	105.139	178.045	1.1462	0.0136515
COX7A2P2	female	male	1220.79	557.655	936.587	1.13034	4.53759e-10
NPY5R	female	male	99.8017	45.6784	76.606	1.12798	0.000498952
ZNF181	female	male	269.852	123.793	207.255	1.12434	2.07208e-08
DPCD	female	male	668.378	307.035	513.517	1.12223	8.17494e-11
GSTO1	female	male	493.479	227.383	379.438	1.11782	2.96404e-15
COX6C	female	male	2157.22	998.03	1660.43	1.11201	2.78319e-17
TSPAN1	female	male	70.1366	32.4479	53.9843	1.11191	0.0152105
RBIS	female	male	317.275	147.083	244.335	1.10917	1.40553e-07
GMFG	female	male	33.655	15.6238	25.9273	1.10689	0.0441278
ZPBP	female	male	149.669	70.1293	115.581	1.09351	0.000116475
HFM1	female	male	177.054	83.0101	136.75	1.09263	4.84383e-05
RPS8	female	male	1879.42	886.84	1454.03	1.08355	1.41183e-06
RPL31	female	male	1394.2	660.304	1079.67	1.0782	2.02721e-11
TATDN1	female	male	246.69	117.042	191.126	1.07561	5.74941e-07
HAUS1	female	male	69.1041	32.7999	53.5451	1.07545	0.00596918
DUOX2	female	male	43.2484	20.534	33.5136	1.07429	0.0336235
COLEC10	female	male	44.9943	21.4316	34.896	1.06993	0.0472774
C9ORF64	female	male	319.389	152.578	247.898	1.0658	4.87246e-06
TBCA	female	male	549.894	264.385	427.533	1.05643	1.12284e-09
TRA2A	female	male	2058.47	990.098	1600.6	1.05597	9.5753e-10
TPH1	female	male	331.377	159.407	257.676	1.05591	0.00050889
MAP1LC3B	female	male	1226.67	590.029	953.823	1.05582	6.41305e-13
COX6B1	female	male	2554.09	1229.98	1986.61	1.05416	2.72031e-13
MGARP	female	male	932.711	449.674	725.695	1.0526	2.51701e-13
ZMAT1	female	male	41.3204	19.9277	32.1521	1.05242	0.0347949
POMC	female	male	99.1263	47.8416	77.1471	1.05124	0.00195901
LURAP1	female	male	1608.66	777.975	1252.65	1.04807	0.0371872
UNC50	female	male	375.997	182.022	292.865	1.0466	5.61541e-08
LSM7	female	male	263.721	127.78	205.461	1.04531	0.000447433
SLC38A11	female	male	138.418	67.1296	107.866	1.04428	0.00329331
RPS27	female	male	1626.76	789.071	1267.75	1.04381	6.03426e-14
NDUFB4	female	male	998.303	485.2	778.401	1.04089	1.47258e-13
CAPS2	female	male	69.9656	34.0423	54.5699	1.03955	0.0231356
TTC14	female	male	1351.61	658.099	1054.39	1.03826	1.71015e-08
IFI27	female	male	426.604	207.928	332.886	1.03695	0.000526461
SLC40A1	female	male	275.693	134.5	215.182	1.03549	1.68869e-06
HMGB2	female	male	171.383	83.6961	133.803	1.03424	4.15149e-05
HPF1	female	male	416.709	203.508	325.337	1.03407	8.38744e-12
TRIM69	female	male	38.9074	19.0089	30.3795	1.03396	0.04632
DUS4L	female	male	42.654	20.8323	33.3018	1.03377	0.0293429
POGLUT1	female	male	458.686	225.182	358.613	1.02633	4.38685e-11
MORN3	female	male	194.92	95.892	152.479	1.02342	5.98642e-05
TRIAP1	female	male	70.738	34.924	55.3892	1.01816	0.00487229
DNAH7	female	male	190.859	94.3875	149.514	1.01567	0.00857345
GABARAPL2	female	male	2370.56	1173.68	1857.61	1.01419	1.19489e-15
ZNF732	female	male	226.355	112.145	177.407	1.01309	7.65127e-07
COPS9	female	male	1219.83	607.931	957.586	1.00465	3.24522e-08
COX16	female	male	234.993	117.307	184.556	1.00216	1.09675e-06
HDAC1	female	male	171.643	85.7716	134.841	1.00079	0.000162534
TMEM67	female	male	1053.34	526.655	827.616	1.00002	1.68308e-08
CA9	female	male	100.289	50.2491	78.8432	0.997151	0.0310508
PNLIPRP2	female	male	86.877	43.5543	68.3101	0.996492	0.0231996
ZNF214	female	male	99.3859	49.9407	78.1951	0.992697	0.00342691
SCN7A	female	male	228.568	114.861	179.836	0.992534	0.0153591
AK9	female	male	68.8116	34.6483	54.1702	0.990318	0.0307316
RASSF7	female	male	269.634	135.748	212.254	0.99016	2.82408e-07
KLC3	female	male	87.3927	44.1186	68.8467	0.986206	0.00181054
MAIP1	female	male	356.662	180.196	281.033	0.985001	3.02001e-09
JRKL	female	male	127.677	64.6705	100.674	0.981462	0.000852888
KIF7	female	male	418.311	212.388	330.058	0.977964	0.00542856
CCDC17	female	male	52.4406	26.6745	41.398	0.975603	0.0275067
LVRN	female	male	85.8574	43.7729	67.8212	0.971554	0.0231356
VSTM1	female	male	168.876	86.1535	133.423	0.971182	0.0150659
TMEM218	female	male	270.692	138.254	213.933	0.969445	0.00103552
AQP1	female	male	43.1841	22.0543	34.1285	0.969276	0.0416212
CERKL	female	male	105.41	53.8987	83.3336	0.967539	0.00158066
SCML1	female	male	599.13	307.256	474.041	0.963351	5.21075e-08
EBP	female	male	66.2355	34.0121	52.4255	0.961551	0.00477406
PPP1R35	female	male	107.255	55.154	84.926	0.959615	0.00223517
SERTAD1	female	male	67.2881	34.6238	53.2891	0.958598	0.0196912
COL16A1	female	male	159.961	82.7375	126.865	0.951246	6.35106e-05
CCDC150	female	male	47.9059	24.8242	38.0137	0.948859	0.0394683
VBP1	female	male	883.055	457.518	700.682	0.948691	2.61259e-13
ZNF182	female	male	229.276	118.852	181.951	0.947962	5.8942e-05
ZNF502	female	male	282.01	146.201	223.806	0.94792	0.000281169
TMEM60	female	male	120.554	62.4972	95.6723	0.947724	0.00166707
MCM8	female	male	197.176	102.333	156.529	0.946185	0.0471905
TNFAIP8	female	male	60.1907	31.2644	47.7937	0.944933	0.0390408
ADRB3	female	male	121.706	63.3731	96.706	0.941124	0.0192654
MPHOSPH6	female	male	222.204	115.854	176.625	0.939746	3.26816e-05
ATOX1	female	male	228.515	119.176	181.655	0.939002	2.68705e-05
C1ORF53	female	male	135.09	70.491	107.405	0.93856	0.000602518
ATP5MF	female	male	1030.13	538.722	819.526	0.935176	3.25178e-08
TFB1M	female	male	119.476	62.5179	95.0653	0.934469	0.000842169
NDUFS4	female	male	786.27	411.549	625.675	0.933943	1.06781e-10
ATP5MC3	female	male	2514.62	1318.6	2002.04	0.931323	3.74448e-17
GLMN	female	male	747.965	392.849	595.772	0.929056	8.16367e-11
SAP30	female	male	182.519	95.9045	145.399	0.928399	3.19412e-05
MED30	female	male	160.869	84.5257	128.151	0.928159	0.000470192
CCDC167	female	male	61.2065	32.1628	48.7592	0.928093	0.0150139
RPL37	female	male	1554.86	817.423	1238.82	0.927596	2.93091e-08
ATP5MC1	female	male	1188.21	624.724	946.716	0.927469	6.62213e-10
ZBTB32	female	male	144.497	76.0161	115.148	0.926594	0.000518588
ESRP2	female	male	356.378	187.483	283.994	0.926584	7.24509e-05
ACO1	female	male	2111.13	1110.83	1682.43	0.92639	3.30434e-12
GABPB2	female	male	858.255	451.977	684.136	0.92514	3.13926e-15
PSMA2	female	male	1033.02	544.602	823.696	0.923634	7.39747e-17
ESD	female	male	523.448	276.481	417.605	0.921035	2.71543e-07
AGBL3	female	male	123.484	65.2688	98.5346	0.919813	0.000497511
RHOBTB3	female	male	1131.58	598.122	902.954	0.919784	1.21715e-15
BTF3	female	male	1191.8	631.094	951.496	0.91723	1.89754e-12
COL22A1	female	male	60.1667	31.8623	48.0363	0.916917	0.0266263
SRSF6	female	male	2218.01	1178.52	1772.52	0.912295	8.03061e-08
ZSCAN9	female	male	111.85	59.4425	89.3899	0.911864	0.00184148
CLC	female	male	63.3275	33.6934	50.6271	0.910191	0.0336359
IMMP1L	female	male	113.091	60.3739	90.498	0.905685	0.000708246
NDUFA9	female	male	1841.67	984.067	1474.12	0.9042	0.0316136
ATP5F1E	female	male	1067.92	570.774	854.857	0.903743	5.7106e-10
YPEL5	female	male	1406.02	751.68	1125.59	0.903438	5.99414e-19
RTN4IP1	female	male	214.907	114.885	172.041	0.903399	3.29175e-05
SPACA6	female	male	625.129	334.249	500.466	0.903269	1.13786e-05
SEC31B	female	male	448.749	239.942	359.26	0.903268	4.80273e-08
JHY	female	male	104.885	56.0885	83.9722	0.903208	0.0051534
SUMO1	female	male	2273.74	1216.44	1820.61	0.902403	6.31382e-19
UBE3D	female	male	64.6061	34.6222	51.7558	0.900092	0.0434231
ARL6	female	male	284.101	152.331	227.628	0.899204	0.00425221
LSM6	female	male	187.149	100.467	149.999	0.897514	0.0018917
HINT2	female	male	481.196	258.622	385.807	0.89567	3.52656e-07
DMAC1	female	male	249.648	134.183	200.163	0.895557	2.9061e-05
CABCOCO1	female	male	64.1601	34.6269	51.503	0.889614	0.0361734
TMEM14A	female	male	227.881	123.108	182.978	0.888159	0.000284968
METAP1D	female	male	177.993	96.2046	142.941	0.887664	0.00254732
NPL	female	male	140.502	75.9811	112.85	0.886713	0.00519364
LSM3	female	male	140.471	76.3214	112.978	0.880125	0.00500242
TMEM240	female	male	403.745	219.36	324.723	0.880099	3.02001e-09
ITGA2B	female	male	180.73	98.3491	145.424	0.878028	0.00405113
ZSCAN4	female	male	388.909	211.633	312.933	0.877871	0.000137041
CDH19	female	male	119.327	64.958	96.0259	0.87716	0.0151967
CDCA7	female	male	155.647	84.862	125.31	0.874847	0.00243016
OPALIN	female	male	562.496	307.808	453.344	0.86983	0.0039616
MYLPF	female	male	154.553	84.6125	124.578	0.869181	0.00190295
ANAPC13	female	male	600.196	328.801	483.884	0.868124	1.15635e-08
COL4A3	female	male	71.497	39.21	57.6598	0.866691	0.0275541
HPS5	female	male	239.252	131.237	192.96	0.866503	0.0014608
NUDT5	female	male	189.702	104.193	153.055	0.864502	0.0026245
GBP6	female	male	265.488	145.84	214.21	0.864319	0.0284766
OSGEPL1	female	male	107.095	58.8365	86.413	0.863976	0.00372444
RBM45	female	male	672.776	369.717	542.893	0.863619	2.78054e-07
ZRSR2	female	male	228.943	125.926	184.793	0.862346	8.59044e-05
MT-CO3	female	male	3707.99	2039.69	2993	0.862283	2.72484e-09
TMEM14C	female	male	707.877	389.529	571.442	0.861834	3.51014e-11
TMSB10	female	male	1866.52	1028.95	1507.56	0.859151	9.07577e-07
TIMM17A	female	male	922.725	509.607	745.674	0.856497	3.57675e-11
HEBP1	female	male	501.264	277.058	405.175	0.855369	0.00421938
TARDBP	female	male	635.575	351.396	513.784	0.854926	9.73521e-08
NUDT2	female	male	194.96	107.843	157.624	0.854239	4.98262e-05
RNLS	female	male	190.969	105.747	154.445	0.852918	0.000224589
BRAWNIN	female	male	139.184	77.2219	112.629	0.849781	0.00400575
RPL38	female	male	863.125	478.94	698.474	0.849729	2.74993e-05
TXN	female	male	604.575	335.871	489.416	0.848039	5.58265e-07
HELB	female	male	264.079	146.759	213.799	0.847541	0.000120071
SMIM17	female	male	1316.62	732.632	1066.34	0.845704	1.68381e-11
SNRPA1	female	male	387.761	216.025	314.16	0.84388	4.17051e-07
ODF2L	female	male	215.525	120.12	174.637	0.843329	0.0252583
CCDC39	female	male	963.374	536.982	780.634	0.843257	5.05254e-05
MT3	female	male	3423.84	1909.13	2774.68	0.842689	3.16824e-06
L2HGDH	female	male	559.78	312.27	453.704	0.842204	1.2465e-05
TYW3	female	male	311.98	174.084	252.882	0.841854	2.04979e-06
RPL29	female	male	1655.61	924.248	1342.17	0.841008	8.37986e-12
DYNLRB2	female	male	85.0224	47.4882	68.9363	0.840293	0.0367077
ATPSCKMT	female	male	89.2583	49.921	72.3995	0.838214	0.0103298
MRPS23	female	male	1073.56	601.122	871.087	0.8367	2.78054e-07
RPL34	female	male	732.319	410.572	594.427	0.834817	1.40011e-09
TRIM68	female	male	478.124	268.292	388.196	0.833613	0.0098142
MRPL42	female	male	262.021	147.065	212.754	0.833191	3.77986e-06
WDR41	female	male	596.662	335.27	484.637	0.831545	2.41179e-08
UHRF2	female	male	651.948	366.403	529.572	0.831348	1.36364e-05
ADAMTS13	female	male	278.019	156.253	225.833	0.831247	0.00857706
GNPNAT1	female	male	298.324	167.928	242.44	0.82907	1.93976e-07
ADGRV1	female	male	487.31	274.784	396.228	0.826541	9.69726e-08
HNMT	female	male	97.8042	55.1835	79.5382	0.825735	0.0192474
ELMOD2	female	male	189.227	106.939	153.961	0.823577	0.00103327
RPL39	female	male	977.211	552.503	795.193	0.822685	4.46193e-08
RFESD	female	male	99.0983	56.0811	80.6623	0.821362	0.0130031
SEC61B	female	male	153.204	86.7483	124.723	0.820565	0.00101771
UQCC2	female	male	855.412	485.031	696.678	0.818486	4.30816e-06
BEX2	female	male	1045.02	592.641	851.142	0.818295	5.47448e-09
MED21	female	male	234.896	133.246	191.332	0.81792	9.27084e-05
C9ORF43	female	male	226.022	128.252	184.121	0.817296	0.0180193
B3GALT5	female	male	201.818	114.627	164.45	0.816262	0.000717437
PJVK	female	male	109.386	62.189	89.1588	0.8147	0.0091115
ZWILCH	female	male	63.0441	35.8513	51.3901	0.814405	0.0346906
MRPL13	female	male	212.809	121.026	173.474	0.814115	3.61744e-05
PSMB7	female	male	1154	656.721	940.882	0.813293	1.71353e-11
TMOD1	female	male	233.646	133.046	190.531	0.812332	0.000867079
RESP18	female	male	249.825	142.529	203.841	0.809899	0.0245953
RPE	female	male	199.711	113.995	162.976	0.809028	0.000737934
MRPL2	female	male	340.908	194.594	278.202	0.808824	1.85557e-05
ZDHHC15	female	male	86.8893	49.6393	70.925	0.807737	0.0127918
C15ORF40	female	male	178.418	101.971	145.655	0.807091	0.0145209
DZANK1	female	male	148.915	85.1761	121.598	0.805885	0.000636246
SRSF1	female	male	1610.93	921.815	1315.6	0.805369	3.78126e-09
PDCD5	female	male	732.645	419.26	598.337	0.80528	0.000217714
SPSB2	female	male	99.1032	56.7307	80.9435	0.805042	0.0176616
PKNOX1	female	male	643.893	368.569	525.897	0.804899	1.10028e-07
RPP30	female	male	204.943	117.352	167.404	0.804482	0.00246518
SRI	female	male	844.276	483.626	689.712	0.803837	9.94633e-11
SACS	female	male	309.265	177.168	252.652	0.803751	0.00721428
ADPRM	female	male	337.159	193.417	275.555	0.801891	1.78958e-05
LENG8	female	male	5897.15	3383.18	4819.73	0.801635	1.60155e-05
SELENOF	female	male	1280.48	735.238	1046.81	0.800429	2.52375e-09
HSD17B8	female	male	102.532	58.8846	83.8258	0.800377	0.0317213
HPRT1	female	male	1095.48	629.154	895.625	0.800111	1.85721e-12
SLC25A26	female	male	114.205	65.6065	93.377	0.799879	0.00595133
PET100	female	male	225.395	129.624	184.35	0.798232	0.000116553
ZNF23	female	male	737.582	424.534	603.418	0.796905	4.30816e-06
TAFA3	female	male	211.788	121.913	173.27	0.796795	0.0321309
COX14	female	male	338.912	195.498	277.449	0.793724	2.08081e-05
ZNF846	female	male	84.2494	48.6969	69.0126	0.790646	0.0230868
GSTM3	female	male	122.386	70.768	100.264	0.790232	0.0118162
CETN3	female	male	266.85	154.441	218.674	0.788942	0.000230707
DYNC2H1	female	male	290.962	168.443	238.454	0.788445	0.00304453
HINT1	female	male	2279.42	1319.83	1868.17	0.788339	2.08721e-13
LONRF2	female	male	904.37	523.809	741.272	0.787916	3.62842e-05
TMLHE	female	male	243.796	141.221	199.835	0.787587	0.000263186
ZNRF2	female	male	149.108	86.3906	122.229	0.787434	0.000964495
FAM207A	female	male	373.112	216.385	305.943	0.786207	4.84654e-06
DIPK1A	female	male	531.519	308.36	435.879	0.785568	7.16525e-06
TF	female	male	9035.95	5245.71	7411.56	0.784536	0.0281714
HHIPL2	female	male	590.302	343.362	484.47	0.781766	0.00512907
RIOK2	female	male	253.322	147.374	207.916	0.781429	0.000199453
TAF15	female	male	1648.78	959.441	1353.35	0.781141	3.74448e-17
ZNF343	female	male	116.828	67.9972	95.9007	0.780753	0.0386282
HEMK1	female	male	257.821	150.193	211.695	0.779471	0.00941926
BTN1A1	female	male	1336.44	778.696	1097.4	0.779253	2.11077e-07
PSMB4	female	male	1318.5	768.299	1082.7	0.779172	8.33438e-12
MEMO1	female	male	359.567	209.526	295.264	0.779006	9.6302e-06
ADAMTS20	female	male	110.207	64.3573	90.557	0.776125	0.00721428
ACOT4	female	male	373.43	218.139	306.876	0.775627	1.6741e-05
CIITA	female	male	2689.73	1572.98	2211.12	0.773991	1.4531e-11
RALB	female	male	299.313	175.039	246.053	0.773966	0.000447433
TRAPPC2	female	male	503.233	294.799	413.904	0.771588	2.17881e-07
MRPL52	female	male	241.15	141.284	198.35	0.771339	0.00597723
NPR1	female	male	375.895	220.328	309.223	0.770717	0.000175388
ADH5	female	male	601.232	352.479	494.623	0.770419	1.65569e-05
CROT	female	male	131.665	77.2313	108.336	0.769723	0.00249413
SLC35F5	female	male	454.324	266.908	374.003	0.767434	6.93259e-08
SMIM20	female	male	253.934	149.19	209.044	0.767117	0.000296774
ATM	female	male	1137.21	668.346	936.267	0.766864	9.90821e-06
CEP78	female	male	431.738	253.796	355.477	0.766618	1.96374e-05
SPTSSA	female	male	334.68	196.727	275.557	0.766547	8.39744e-07
PRDX4	female	male	139.642	82.1375	114.997	0.765668	0.00301826
UPRT	female	male	399.304	235.002	328.889	0.764756	1.25994e-07
IPP	female	male	668.634	393.784	550.841	0.763787	2.78054e-07
CFHR5	female	male	216.029	127.278	177.992	0.763324	0.0415982
TFB2M	female	male	381.696	224.955	314.521	0.762896	8.38201e-06
ZFP37	female	male	227.243	133.916	187.246	0.762752	0.000973194
ZDHHC13	female	male	152.321	89.7929	125.523	0.762544	0.00126411
BDH2	female	male	74.7664	44.1113	61.6285	0.760907	0.0411321
L3MBTL1	female	male	620.879	366.694	511.942	0.759716	8.88303e-08
N4BP2L2	female	male	495.162	292.493	408.304	0.759538	0.00252536
NTAN1	female	male	878.685	519.336	724.678	0.758649	4.67282e-06
HARS2	female	male	707.774	419.007	584.017	0.756314	0.00892117
ZDHHC11B	female	male	195.972	116.101	161.742	0.755278	0.00133844
SNX16	female	male	408.412	242.05	337.114	0.754772	5.99954e-07
GATC	female	male	510.622	303.027	421.652	0.752854	1.69922e-05
SHQ1	female	male	222.826	132.319	184.037	0.75178	0.00261034
STX16	female	male	2483.03	1474.69	2050.88	0.751723	2.922e-11
RPIA	female	male	149.593	88.8645	123.566	0.751567	0.00329817
MROH8	female	male	263.276	156.399	217.472	0.751398	0.00656489
MYNN	female	male	341.98	203.783	282.753	0.746959	2.11927e-06
ZNF256	female	male	408.897	243.808	338.145	0.74597	0.00027485
SRSF11	female	male	5367.96	3202.45	4439.89	0.745209	1.1725e-07
COA6	female	male	148.358	88.5372	122.721	0.744671	0.00370443
NHLRC3	female	male	416.361	248.555	344.444	0.744396	1.06842e-05
CYREN	female	male	373.751	223.095	309.184	0.744353	8.99579e-05
CFAP46	female	male	204.557	122.308	169.307	0.742104	0.000520447
RXFP1	female	male	201.27	120.367	166.597	0.741666	0.0357043
RPL27	female	male	1432.71	857.05	1186	0.741284	3.82271e-08
GINS2	female	male	112.577	67.4092	93.2193	0.739944	0.00906851
PALM3	female	male	253.667	151.984	210.089	0.73894	0.00548903
ZNF772	female	male	661.887	396.625	548.203	0.738835	0.00440036
GASK1A	female	male	238.092	142.753	197.233	0.737997	0.0446877
SMAD9	female	male	311.306	186.676	257.893	0.73791	0.000121086
EMID1	female	male	149.749	89.8251	124.067	0.737417	0.0168823
COX15	female	male	186.462	111.868	154.493	0.73724	0.00217739
NUP160	female	male	264.813	159.016	219.472	0.735898	0.000139958
MESP1	female	male	118.354	71.0824	98.0946	0.735667	0.0208659
FAM13B	female	male	2366.88	1422.04	1961.95	0.735007	2.06403e-06
LEPR	female	male	122.882	73.8421	101.865	0.734835	0.026497
ATG5	female	male	521.564	313.404	432.353	0.734807	9.51159e-06
METTL18	female	male	100.938	60.6502	83.6719	0.734775	0.0263772
PFDN6	female	male	435.295	261.72	360.906	0.734001	0.000140012
CDKN2B	female	male	390.843	235.039	324.07	0.733803	0.00013902
ATP5PD	female	male	1784.59	1074.01	1480.05	0.732568	1.96374e-05
SLC26A4	female	male	98.7584	59.4755	81.9229	0.731947	0.038027
ETNK1	female	male	806.632	486.633	669.49	0.729091	0.00172157
PSMC2	female	male	1050.86	633.999	872.205	0.729042	9.73521e-08
PMS1	female	male	280.33	169.358	232.771	0.727064	0.0109297
CARTPT	female	male	420.012	253.74	348.753	0.727034	0.0262921
SMIM30	female	male	685.031	414.226	568.972	0.725749	6.00022e-06
FAM151B	female	male	452.113	273.68	375.642	0.724192	0.00217141
SPATA4	female	male	106.249	64.3666	88.2995	0.723145	0.0400936
ZNF593	female	male	187.914	113.995	156.234	0.721029	0.00401637
PI4K2B	female	male	234.857	142.5	195.275	0.720714	0.000203685
NTS	female	male	128.797	78.159	107.095	0.720643	0.0127177
NMRK1	female	male	219.119	132.981	182.203	0.720464	0.000406012
PSMG3	female	male	275.419	167.302	229.083	0.719255	0.00122508
PRIM1	female	male	205.769	125.045	171.173	0.71873	0.00452628
DBI	female	male	1201.34	731.112	999.813	0.716456	1.85364e-05
CHUK	female	male	1117	679.901	929.674	0.716265	4.69739e-11
ZNF300	female	male	189.215	115.232	157.508	0.715478	0.0154633
QDPR	female	male	1151.3	701.201	958.399	0.715335	2.25098e-05
ZNF829	female	male	109.636	66.7821	91.2702	0.715228	0.0164968
CFAP54	female	male	90.0028	54.8453	74.9353	0.714861	0.0257013
POLB	female	male	392.622	239.3	326.913	0.714319	0.000181944
DTWD1	female	male	107.999	65.8794	89.9478	0.713391	0.018247
RTTN	female	male	449.517	274.217	374.388	0.713068	1.17234e-05
KDM6A	female	male	920.001	561.255	766.252	0.713022	3.61917e-05
FAM155A	female	male	499.309	304.652	415.885	0.712773	0.000150633
INTS6L	female	male	235.922	144.025	196.537	0.712192	0.000271008
CREG1	female	male	634.589	387.578	528.727	0.711263	0.000162682
RCN2	female	male	1522.5	930.522	1268.79	0.710323	7.87238e-11
TMEM167A	female	male	1088.72	665.862	907.497	0.709337	1.63736e-09
MRPL19	female	male	252.414	154.463	210.435	0.708412	0.00105868
RPP40	female	male	168.204	102.953	140.239	0.708268	0.00374707
NAGK	female	male	373.228	228.566	311.23	0.707453	0.00348588
SLC35A5	female	male	850.053	520.621	708.868	0.707306	6.06042e-07
C1QA	female	male	429.424	263.216	358.192	0.70617	0.000930387
CFAP97	female	male	477.279	292.594	398.128	0.705962	3.04438e-05
PPP2R5A	female	male	556.2	341.045	463.991	0.705697	1.81983e-05
DGUOK	female	male	85.9368	52.708	71.6959	0.704955	0.0462505
RWDD2A	female	male	617.254	378.828	515.072	0.704388	1.61189e-05
ATP5MG	female	male	2040.91	1252.65	1703.09	0.704209	5.19598e-12
QPCT	female	male	507.092	311.279	423.172	0.703914	2.00513e-05
RYR1	female	male	3483.22	2139.35	2907.28	0.703255	0.00226389
ATP6V1D	female	male	2627.8	1614.18	2193.39	0.703034	6.54522e-09
GOLT1B	female	male	310.574	190.886	259.279	0.702363	0.000156914
GHDC	female	male	206.675	127.154	172.595	0.700742	0.00198552
GPRASP2	female	male	2257.96	1389.86	1885.92	0.700103	5.41091e-11
CYCS	female	male	2703.07	1664.09	2257.79	0.699824	1.82335e-11
HACE1	female	male	869.719	535.539	726.499	0.699613	1.90907e-05
ZNF136	female	male	163.626	100.791	136.697	0.699108	0.0213178
RRP9	female	male	208.677	128.677	174.391	0.697585	0.00185877
UTP18	female	male	373.031	230.076	311.765	0.697273	0.000369579
RPL9	female	male	3836.39	2366.09	3206.26	0.697223	1.0353e-09
LYRM2	female	male	399.154	246.915	333.909	0.692822	0.000790051
CCDC9	female	male	528.138	326.761	441.834	0.692646	0.0121853
ZFC3H1	female	male	1323.1	819.521	1107.28	0.691088	4.73287e-07
IGSF9B	female	male	3037.09	1882.24	2542.15	0.690254	0.000884902
BROX	female	male	1088.88	675.719	911.81	0.68831	7.53295e-07
OTULINL	female	male	642.979	399.611	538.678	0.686144	3.28234e-05
MARS2	female	male	655.647	407.582	549.334	0.685862	0.00014879
ALDH3A2	female	male	1345.97	836.821	1127.76	0.685649	0.000507994
BEX4	female	male	476.722	296.673	399.558	0.684292	1.09353e-05
VPS25	female	male	446.362	277.971	374.195	0.683372	6.89553e-06
DDX17	female	male	12238.5	7621.58	10259.8	0.683265	8.44087e-10
RPL7	female	male	2339.88	1457.63	1961.77	0.682796	8.47118e-06
ZFX	female	male	777.977	484.962	652.399	0.681799	5.69033e-06
NDUFA12	female	male	1116.78	696.208	936.536	0.68173	2.33316e-07
CEP20	female	male	229.983	143.434	192.891	0.681196	0.00172802
MTX2	female	male	523.863	326.936	439.466	0.680144	1.93167e-05
ZNF14	female	male	258.611	161.425	216.96	0.679803	0.004025
ZSWIM7	female	male	100.024	62.5307	83.9556	0.678171	0.04632
TFR2	female	male	911.642	570.43	765.408	0.676357	1.79144e-05
BOLA3	female	male	195.894	122.599	164.482	0.676083	0.00566489
ZNF613	female	male	352.974	220.996	296.412	0.675576	0.00330984
RBM5	female	male	2276.48	1425.86	1911.93	0.674996	1.78958e-05
FAM241B	female	male	284.024	178.044	238.604	0.673803	0.000313421
PSMD14	female	male	1078.7	676.333	906.255	0.673488	1.60341e-08
STK36	female	male	412.889	258.889	346.889	0.673456	0.000459265
KYAT3	female	male	136.241	85.4886	114.49	0.672195	0.00684846
BTG3	female	male	399.572	250.817	335.82	0.671904	0.0105459
UTP20	female	male	567.676	356.731	477.271	0.670309	6.13934e-06
GSAP	female	male	177.839	111.801	149.537	0.669458	0.0159093
CCDC9B	female	male	296.644	186.626	249.493	0.66865	0.00669675
LDHB	female	male	6609.72	4158.26	5559.09	0.668611	2.90136e-06
FANCM	female	male	251.666	158.409	211.699	0.667859	0.00617796
H2AZ1	female	male	988.882	622.432	831.832	0.667854	9.58751e-05
PDE7A	female	male	623.522	392.855	524.665	0.666507	5.2857e-06
COX7A1	female	male	458.222	288.697	385.569	0.666387	0.000495506
NQO1	female	male	265.896	167.52	223.735	0.666373	0.0317992
FKBP3	female	male	918.801	579.173	773.246	0.665736	5.94557e-06
PAXBP1	female	male	1257.84	792.909	1058.58	0.665732	1.28719e-07
NUDT14	female	male	301.271	190.289	253.707	0.66285	0.000540265
TXNDC17	female	male	202.285	127.771	170.35	0.662642	0.00469071
MCEE	female	male	153.164	96.8163	129.015	0.661671	0.0173769
ANXA1	female	male	144.979	91.6547	122.126	0.661592	0.0441128
ZNF211	female	male	557.703	352.683	469.837	0.661121	0.000136703
SLC25A37	female	male	294.639	186.373	248.239	0.660841	0.00207437
LMBR1L	female	male	168.395	106.634	141.926	0.659334	0.0136064
UGGT2	female	male	179.291	113.698	151.18	0.657286	0.00342691
MLH3	female	male	667.919	423.738	563.27	0.656551	3.77986e-06
WSB1	female	male	1832.61	1163.65	1545.91	0.655282	2.0627e-06
VIRMA	female	male	1578.37	1002.7	1331.65	0.654542	1.71015e-08
TMEM147	female	male	1047.48	665.567	883.805	0.654296	2.70628e-08
CDO1	female	male	1629.06	1035.33	1374.6	0.653946	4.52231e-06
RPS17	female	male	2672.64	1702.68	2256.94	0.650437	6.74318e-05
TFRC	female	male	4426.56	2822.13	3738.95	0.649407	0.000356363
ATP13A3	female	male	992.568	633.191	838.549	0.648594	1.72743e-07
USP14	female	male	867.814	553.722	733.203	0.648206	2.69214e-08
RPA1	female	male	889.697	568.413	752.004	0.64646	0.00016052
SEC14L5	female	male	282.073	180.265	238.441	0.646144	0.00329331
COMMD8	female	male	350.921	224.3	296.655	0.645798	0.000552481
MRPL18	female	male	585.273	374.154	494.793	0.645482	0.000319672
XPO1	female	male	1736.26	1110.59	1468.12	0.64464	1.0353e-09
UBN2	female	male	1243.67	795.65	1051.66	0.644455	2.53393e-05
CENATAC	female	male	189.019	121.047	159.888	0.643161	0.0179586
NDUFB8	female	male	1573.38	1008.17	1331.15	0.6421	6.04412e-10
CSTF2	female	male	659.966	423.051	558.431	0.641516	0.000178707
D2HGDH	female	male	484.647	310.974	410.215	0.64024	0.0249935
TSC22D3	female	male	2057.94	1320.39	1741.85	0.640226	0.000604959
PHPT1	female	male	583.444	374.407	493.857	0.63995	1.8355e-05
ZNF565	female	male	207.06	132.981	175.312	0.638987	0.0036014
TLR1	female	male	190.341	122.294	161.178	0.638166	0.00977844
CPQ	female	male	122.919	79.0525	104.119	0.636839	0.0231996
TMEM87B	female	male	243.911	156.951	206.642	0.636011	0.00548036
SLC25A13	female	male	169.956	109.425	144.014	0.635151	0.0493316
FAM92A	female	male	1353.15	872.148	1147	0.633672	4.06934e-05
RAB14	female	male	3645.09	2349.81	3089.97	0.633407	3.24522e-08
TMEM62	female	male	513.561	331.185	435.4	0.632809	3.15281e-05
OCEL1	female	male	141.561	91.3117	120.026	0.632423	0.0457793
RSRC1	female	male	387.027	249.75	328.194	0.632015	6.20543e-05
COL21A1	female	male	112.033	72.3128	95.01	0.631708	0.0223142
ZSCAN32	female	male	179.364	115.784	152.116	0.631338	0.0118575
POP5	female	male	153.627	99.2559	130.325	0.630196	0.00922766
BLOC1S2	female	male	356.471	230.404	302.442	0.629543	0.00477151
OCC1	female	male	403.331	260.733	342.218	0.629452	0.000283664
METTL6	female	male	315.011	203.765	267.334	0.628306	0.00141059
PPIA	female	male	6148.31	3977.94	5218.15	0.628163	2.508e-05
PNO1	female	male	398.703	258.322	338.54	0.626172	0.000542303
ABCC8	female	male	1328.35	861.322	1128.2	0.625028	0.000608124
UQCRH	female	male	2078.43	1347.68	1765.25	0.624999	3.45611e-07
RPA2	female	male	335.834	217.759	285.23	0.624974	0.00870177
LCMT2	female	male	533.057	345.689	452.756	0.624759	0.00011355
SLC25A3	female	male	6088.19	3949.79	5171.73	0.624233	9.21749e-13
RGS9	female	male	753.224	488.745	639.876	0.623964	0.000727435
EIF3J	female	male	780.725	506.751	663.307	0.62352	1.30259e-06
NME6	female	male	269.013	174.662	228.577	0.62322	0.0130872
RAB1A	female	male	2346.91	1523.9	1994.19	0.622986	7.71423e-14
PFKFB2	female	male	1205.23	782.77	1024.17	0.622696	1.76923e-05
RPL23A	female	male	4458.7	2896.09	3789.01	0.62251	0.000169538
SCN9A	female	male	188.062	122.268	159.864	0.621241	0.0129015
GTF2IRD2B	female	male	138.497	90.0759	117.745	0.620753	0.0168382
TCEAL4	female	male	256.258	166.647	217.853	0.620638	0.00117861
TMEM126A	female	male	382.859	249.362	325.646	0.618501	0.00127404
ZNF397	female	male	266.454	173.746	226.722	0.617004	0.0013456
ATP11C	female	male	457.552	298.384	389.337	0.616696	3.81e-05
ZNF215	female	male	292.322	190.682	248.762	0.616439	0.0108974
PPM1K	female	male	2097.4	1368.54	1785.03	0.615959	0.000149609
ZNF331	female	male	746.182	486.967	635.09	0.615711	3.96123e-06
RAB23	female	male	257.201	167.858	218.911	0.615596	0.00235251
TMEM50A	female	male	574.651	375.125	489.14	0.615371	8.95781e-06
SMDT1	female	male	457.647	298.765	389.555	0.615178	1.15124e-05
STOX1	female	male	468.081	305.8	398.532	0.614287	0.000794786
EGFEM1	female	male	159.435	104.185	135.757	0.613922	0.0272601
FIGNL1	female	male	579.485	378.886	493.514	0.612929	0.00139835
GPAT3	female	male	263.352	172.274	224.319	0.612418	0.0020326
BZW1	female	male	4048.64	2648.28	3448.48	0.612387	4.31434e-07
DNASE2	female	male	275.876	180.534	235.015	0.611771	0.00997484
DLX1	female	male	300.797	196.856	256.251	0.611472	0.0297693
SERP1	female	male	124.527	81.5168	106.094	0.611328	0.0230338
POLR1H	female	male	217.168	142.178	185.029	0.611228	0.00382261
TMEM18	female	male	695.542	455.411	592.629	0.610982	0.000334131
ILKAP	female	male	540.853	354.33	460.915	0.610169	0.00342691
LAMTOR5	female	male	693.562	454.42	591.072	0.609967	0.00126449
SNX10	female	male	817.717	535.998	696.98	0.60938	2.50156e-05
RMDN1	female	male	285.53	187.266	243.417	0.608472	0.00406158
NUBPL	female	male	357.908	234.739	305.121	0.608411	0.000891329
ERBB3	female	male	353.655	231.998	301.516	0.608164	0.00660129
BCAT1	female	male	3021.17	1982.42	2575.99	0.607848	3.8266e-06
RASA2	female	male	831.19	545.567	708.78	0.60741	5.09821e-06
CATSPER2	female	male	150.798	99.0142	128.605	0.606972	0.0196911
SLC25A4	female	male	3738.86	2455.31	3188.77	0.606697	3.68374e-05
HMGN3	female	male	597.222	392.254	509.378	0.606549	0.000496669
ORC3	female	male	256.475	168.562	218.798	0.60559	0.00225415
HACD3	female	male	2109.19	1387.29	1799.8	0.60444	1.87727e-10
SLC4A10	female	male	5060.33	3328.72	4318.21	0.604257	8.41929e-07
NAP1L2	female	male	974.523	641.174	831.659	0.603944	0.000415149
WDR17	female	male	666.011	438.231	568.391	0.603863	0.0141696
SDHD	female	male	1063.56	699.875	907.696	0.60366	0.000192561
EDRF1	female	male	400.499	263.581	341.82	0.603655	0.00136518
TGDS	female	male	126.536	83.3517	108.028	0.602551	0.0302068
RSBN1	female	male	334.902	220.6	285.915	0.602283	0.0148122
RIMKLB	female	male	1537.72	1013.13	1312.89	0.602013	6.64634e-05
ZNF276	female	male	887.32	584.701	757.626	0.60179	0.00120049
SLC22A5	female	male	910.214	599.898	777.222	0.601442	6.00469e-06
ZNF202	female	male	334.21	220.285	285.385	0.601273	0.00236246
CARNMT1	female	male	261.478	172.549	223.366	0.599788	0.000949936
SCAND2P	female	male	172.803	114.036	147.617	0.599678	0.0230713
POLR2F	female	male	320.124	211.481	273.563	0.598115	0.0036605
PRDX5	female	male	1936.74	1279.65	1655.13	0.59788	5.56513e-06
PIP4P2	female	male	593.627	392.475	507.419	0.596879	7.53255e-05
SLC25A33	female	male	1236.53	817.67	1057.02	0.596702	3.56342e-05
MTX3	female	male	1316.45	870.523	1125.34	0.596679	0.000105049
PPP1R3C	female	male	817.552	540.654	698.881	0.596553	0.00377535
POLE4	female	male	377.185	249.502	322.464	0.596207	0.00133848
HES6	female	male	262.029	173.389	224.04	0.595649	0.00997484
TMSB15A	female	male	257.78	170.595	220.415	0.595628	0.0422454
NAE1	female	male	653.704	432.758	559.013	0.595166	0.000139751
MBTD1	female	male	618.577	409.515	528.979	0.595088	0.005921
AMIGO2	female	male	343.829	227.682	294.052	0.594743	0.000559901
CCDC181	female	male	521.187	345.324	445.817	0.593825	6.6841e-05
HDAC8	female	male	237.636	157.518	203.3	0.593298	0.00336404
TMEM199	female	male	693.34	459.674	593.197	0.59298	3.20518e-05
NLE1	female	male	190.726	126.526	163.212	0.592052	0.0391714
LANCL1	female	male	3445.88	2286.6	2949.05	0.591674	4.7342e-07
FAM8A1	female	male	414.918	275.411	355.129	0.591209	0.0235686
SERPINI1	female	male	3035.98	2016.18	2598.93	0.590549	5.07113e-05
S100A1	female	male	945.352	627.903	809.303	0.590283	0.0148565
ZNF787	female	male	307.575	204.384	263.35	0.589846	0.00569633
GPN1	female	male	526.039	349.599	450.422	0.589503	0.000204499
NUP35	female	male	143.366	95.2831	122.759	0.589279	0.0176546
RPL23	female	male	2118.93	1408.93	1814.65	0.58872	7.69219e-06
UQCR10	female	male	1336.58	889.074	1144.79	0.588144	0.000447433
ATP6V1H	female	male	1978.91	1316.46	1695.01	0.588045	2.33316e-07
ZFP62	female	male	275.761	183.524	236.231	0.58745	0.0435823
COA5	female	male	762.05	507.31	652.875	0.587021	0.000346218
CISD1	female	male	1040.03	692.487	891.081	0.58673	5.86968e-08
C14ORF28	female	male	119.181	79.3964	102.13	0.58628	0.0441128
GGA2	female	male	475.617	316.856	407.577	0.585897	0.00581497
BORCS7	female	male	1675.66	1116.43	1435.99	0.585813	7.11255e-06
EFCAB6	female	male	657.233	438.269	563.391	0.584668	2.37005e-05
IFT81	female	male	437.939	292.101	375.437	0.584332	0.00207463
PARP11	female	male	228.652	152.5	196.015	0.584188	0.0252583
RAB18	female	male	795.214	530.736	681.866	0.583327	4.79883e-06
EIF4A1	female	male	3293.07	2197.97	2823.74	0.583263	3.36338e-06
ZNF783	female	male	595.352	397.67	510.631	0.582133	0.000318169
LUC7L3	female	male	3934.26	2628.35	3374.58	0.581936	0.000235221
RPS12	female	male	980.939	655.405	841.425	0.581732	0.000348476
CISD2	female	male	225.134	150.449	193.126	0.581592	0.00434706
TMBIM4	female	male	571	381.662	489.855	0.581247	0.00647846
TOM1L1	female	male	174.663	116.735	149.837	0.581205	0.022823
MLX	female	male	201.225	134.545	172.648	0.580944	0.0176454
C2ORF72	female	male	354.312	236.897	303.991	0.580872	0.0104539
VRK3	female	male	653.087	436.69	560.345	0.580692	9.32332e-06
MSANTD1	female	male	192.357	128.7	165.075	0.579769	0.00631767
PCGF5	female	male	1140.92	763.742	979.27	0.579105	5.83827e-05
ZNF558	female	male	193.361	129.649	166.056	0.576835	0.0191781
NFYB	female	male	641.576	430.254	551.009	0.57654	0.000449409
FIGNL2	female	male	208.86	140.059	179.374	0.576461	0.0310227
PPA1	female	male	1067.65	715.971	916.93	0.576429	0.000593591
HMGCR	female	male	1942.91	1303.06	1668.69	0.57635	1.28729e-09
NADK2	female	male	1497.14	1004.45	1285.98	0.575766	7.97082e-07
TUBGCP5	female	male	817.515	548.628	702.278	0.575378	8.56569e-05
JAML	female	male	293.698	197.233	252.356	0.5744	0.0275295
EXOSC6	female	male	124.563	83.6714	107.038	0.574054	0.0266602
ARL3	female	male	695.401	467.19	597.596	0.573816	0.00233464
CORO6	female	male	873.983	587.471	751.192	0.573125	0.0365609
D1PAS1	female	male	8379.78	5634.58	7203.26	0.572602	3.78916e-12
HIBCH	female	male	929.188	624.886	798.773	0.572363	0.000147977
SLC25A30	female	male	1109.6	746.381	953.935	0.572044	0.000304839
HNRNPU	female	male	9442.42	6351.71	8117.83	0.572012	4.24861e-11
CLK4	female	male	1486.23	999.8	1277.76	0.571996	0.000690776
UBE2E3	female	male	2017.6	1357.45	1734.68	0.571765	2.76543e-08
MTERF2	female	male	173.959	117.068	149.577	0.571578	0.0384601
PTS	female	male	542.853	365.274	466.748	0.571505	0.00020477
TCEAL1	female	male	609.551	410.163	524.099	0.571439	0.000582923
GLS	female	male	1605.67	1080.87	1380.76	0.570957	7.70628e-05
CDKL1	female	male	496.96	334.656	427.401	0.57054	0.0147274
RPL18	female	male	1107.9	746.11	952.848	0.570352	0.000503252
GIN1	female	male	143.287	96.5407	123.253	0.569894	0.0218569
RPL35A	female	male	1957.26	1318.65	1683.57	0.569773	0.000302883
NBEAL1	female	male	1108.29	746.706	953.324	0.569756	0.000273159
PAQR3	female	male	647.071	436.135	556.67	0.569256	8.45538e-05
INO80C	female	male	1059.11	714.117	911.254	0.56866	0.000109557
LUC7L	female	male	2342.08	1579.72	2015.35	0.568141	1.10616e-05
SPIN2	female	male	416.387	280.876	358.311	0.56796	0.0174499
ATP23	female	male	281.499	189.917	242.249	0.567781	0.00629113
TMEM158	female	male	1096.34	739.72	943.501	0.567727	7.59722e-05
NDUFAF5	female	male	507.257	342.291	436.557	0.567567	6.10209e-05
ZNF354A	female	male	541.304	365.246	465.851	0.567558	0.00019775
ERP29	female	male	681.652	460.252	586.766	0.566625	0.000393793
SLC2A11	female	male	164.66	111.266	141.777	0.565785	0.0384718
GKAP1	female	male	351.799	237.77	302.93	0.56519	0.0455636
CFAP61	female	male	483.719	327.049	416.575	0.564753	0.00140411
CMC1	female	male	189.812	128.391	163.489	0.56425	0.0175837
STARD5	female	male	185.14	125.331	159.508	0.56299	0.0109307
FGFR1OP2	female	male	332.169	224.889	286.192	0.56272	0.0060097
SLC6A15	female	male	1282.56	868.652	1105.17	0.562218	0.000169877
VAV1	female	male	583.726	395.53	503.071	0.561538	0.000298651
BEX3	female	male	2984.1	2022.78	2572.11	0.560956	0.000153992
PRKAA1	female	male	317.379	215.135	273.56	0.560857	0.0128801
PCP4L1	female	male	1167.65	792.22	1006.75	0.559605	0.000619462
SSBP1	female	male	364.816	247.541	314.556	0.559458	0.00248955
PRPF4B	female	male	1755.57	1191.38	1513.78	0.5593	0.00210032
TCEAL7	female	male	474.435	321.969	409.093	0.559275	0.0193066
DERL2	female	male	388.724	263.912	335.234	0.558755	0.000633965
ZNF432	female	male	417.178	283.472	359.875	0.557624	0.00660129
GINM1	female	male	302.262	205.388	260.745	0.55758	0.0090162
ZNF77	female	male	202.458	137.549	174.64	0.557522	0.00931762
SAAL1	female	male	358.099	243.329	308.912	0.557391	0.00459139
CCDC175	female	male	170.39	115.809	146.998	0.556973	0.0161503
CD19	female	male	188.427	128.083	162.565	0.556845	0.0161503
KCNJ4	female	male	1261.04	857.537	1088.11	0.556365	0.00365986
RPL27A	female	male	2318.59	1576.67	2000.62	0.556357	1.16651e-05
B3GALNT1	female	male	889.585	605.036	767.636	0.55608	1.31241e-05
FAHD2A	female	male	603.513	410.535	520.808	0.555917	0.00271731
DOCK7	female	male	613.566	417.406	529.497	0.55582	0.000108714
GPR137C	female	male	488.86	332.722	421.943	0.555127	0.0455636
SLC35G2	female	male	432.918	294.773	373.713	0.554387	0.00557062
URAH	female	male	322.676	219.749	278.564	0.554297	0.00872816
TMSB4X	female	male	7649.39	5210.19	6604.02	0.554006	0.000382734
PEX3	female	male	383.672	261.336	331.242	0.553914	0.00380656
RNF175	female	male	410.732	279.846	354.638	0.553606	0.00173579
BBS7	female	male	514.936	350.919	444.643	0.553425	0.00148259
OPRK1	female	male	304.78	207.742	263.192	0.552898	0.00857706
RRM2B	female	male	585.105	398.938	505.319	0.552644	0.000708246
PIN4	female	male	177.937	121.377	153.697	0.551746	0.0483588
COX5A	female	male	1646.51	1123.45	1422.34	0.551474	0.000140943
FAM32A	female	male	1226.18	836.712	1059.27	0.551352	0.00015132
NDUFB11	female	male	588.867	401.98	508.773	0.550768	0.00584069
RRP8	female	male	546.598	373.163	472.269	0.550619	2.7856e-05
MYL6B	female	male	2831.13	1932.99	2446.21	0.550543	9.59294e-07
NDUFA8	female	male	892.154	609.208	770.891	0.550317	0.000173828
ATP5PO	female	male	2321.6	1585.54	2006.15	0.550141	0.000245981
CFAP44	female	male	154.778	105.709	133.749	0.550002	0.0450825
NAMPT	female	male	472.414	322.74	408.268	0.54973	0.00172841
MNS1	female	male	174.967	119.529	151.208	0.549624	0.0200016
URM1	female	male	315.262	215.45	272.485	0.549255	0.00843765
HTRA2	female	male	439.888	300.608	380.196	0.549218	0.000479433
SLC30A4	female	male	926.286	633.634	800.864	0.547836	8.71628e-06
TCEAL3	female	male	395.449	270.56	341.925	0.547466	0.00540677
G2E3	female	male	252.849	173.133	218.685	0.54658	0.00997484
ZDHHC17	female	male	1816.31	1244.2	1571.12	0.545796	2.94879e-06
MYEF2	female	male	932.668	639.17	806.883	0.545153	0.0016001
FDX1	female	male	460.878	315.976	398.777	0.544551	0.000512736
GMNN	female	male	325.788	223.352	281.887	0.544483	0.0111555
ANGPT1	female	male	175.126	120.109	151.547	0.544032	0.0394524
TRAF3IP3	female	male	243.391	166.934	210.624	0.543798	0.0486161
PPP4R1	female	male	632.535	433.916	547.413	0.54377	0.0020326
NPHP1	female	male	366.276	251.689	317.167	0.54144	0.0177964
SEC22A	female	male	392.886	269.996	340.219	0.541244	0.00047197
AP4E1	female	male	385.163	264.761	333.562	0.540829	0.00327578
TSPY26P	female	male	254.029	174.627	220	0.540714	0.012115
CDK5RAP1	female	male	627.587	431.428	543.519	0.540714	1.54889e-05
GPCPD1	female	male	1512.79	1040.26	1310.28	0.540326	0.00156407
LMAN2L	female	male	402.812	277.011	348.897	0.540264	0.00184974
TAMM41	female	male	252.518	173.722	218.748	0.539544	0.0102454
ABCE1	female	male	1278.64	879.759	1107.69	0.53947	7.9892e-07
NIF3L1	female	male	199.028	136.94	172.419	0.539288	0.0244521
COX7A2L	female	male	1165.6	802.057	1009.8	0.539267	0.00023003
RWDD3	female	male	176.303	121.337	152.746	0.538812	0.0188972
TMEM196	female	male	583.048	401.367	505.185	0.538696	0.00548108
ZBTB8A	female	male	3005.82	2069.46	2604.52	0.538518	6.28781e-08
ARMCX4	female	male	794.016	546.678	688.014	0.538418	3.97421e-06
DMAC2L	female	male	360.137	248.026	312.09	0.538122	0.0220446
SEM1	female	male	494.345	340.693	428.494	0.536934	0.0021099
MINDY4	female	male	471.614	325.141	408.84	0.536668	0.00172671
LYRM7	female	male	309.728	213.508	268.491	0.536602	0.00353309
MAPK11	female	male	691.681	477.078	599.709	0.535938	0.00287832
UBE2E1	female	male	544.19	375.395	471.85	0.535729	0.000113017
ZNF32	female	male	476.559	328.751	413.213	0.535666	0.000230123
M6PR	female	male	922.896	636.853	800.306	0.535288	3.77986e-06
UBA7	female	male	346.725	239.282	300.678	0.535195	0.0344694
EFCAB2	female	male	124.32	85.7942	107.809	0.534911	0.0437772
LACC1	female	male	223.164	154.108	193.569	0.534341	0.0163616
ALDH3B1	female	male	298.198	205.881	258.634	0.534335	0.020087
TRAF5	female	male	181.944	125.644	157.816	0.534282	0.0361734
PYM1	female	male	431.878	298.196	374.586	0.53427	0.00223434
ZRANB2	female	male	3088.16	2133.77	2679.13	0.533359	0.000286307
NDUFS5	female	male	651.5	450.291	565.267	0.532911	0.00362555
TMEM208	female	male	222.564	153.883	193.13	0.532471	0.0400785
G3BP1	female	male	1781.04	1231.47	1545.51	0.532324	9.92119e-09
PYROXD1	female	male	314.153	217.241	272.619	0.532225	0.0011571
LAMP2	female	male	2356.1	1629.45	2044.68	0.532018	1.50008e-09
MAP2K1	female	male	2799.4	1936.18	2429.45	0.531879	8.84404e-06
MRPL23	female	male	430.34	297.846	373.557	0.530879	0.00212622
MSH2	female	male	392.578	271.838	340.833	0.530321	0.00173819
DONSON	female	male	744.709	516.065	646.719	0.529172	3.84184e-06
NGLY1	female	male	520.171	360.473	451.729	0.529024	0.0386793
ZNF660	female	male	160.787	111.516	139.671	0.527898	0.0281699
LCORL	female	male	239.479	166.119	208.039	0.527766	0.0349382
SNRPG	female	male	169.603	117.629	147.329	0.527747	0.0346379
EIF1	female	male	4217.38	2927.56	3664.6	0.526649	1.25429e-06
IGBP1	female	male	1039	721.351	902.864	0.526411	0.000275952
ZNF326	female	male	653.062	453.49	567.531	0.526151	5.10955e-05
MAL2	female	male	3415.21	2371.66	2967.98	0.526087	0.00198552
SNX1	female	male	1192.56	828.424	1036.5	0.525562	4.0901e-05
MOCS3	female	male	276.139	191.858	240.019	0.525358	0.0209341
GUF1	female	male	262.372	182.34	228.073	0.524934	0.00660129
ZNF470	female	male	193.064	134.194	167.834	0.524844	0.0183893
MCF2	female	male	610.679	424.95	531.081	0.523097	0.000547914
RAB12	female	male	1634.63	1137.55	1421.6	0.523041	7.13078e-08
ABCA7	female	male	2060.05	1433.65	1791.6	0.522975	0.000812059
MFSD4B	female	male	166.872	116.144	145.131	0.522943	0.0318354
ABHD10	female	male	352.307	245.238	306.42	0.522779	0.0127328
THBS4	female	male	338.444	235.554	294.348	0.522756	0.0428428
RPS6KA6	female	male	419.835	292.285	365.171	0.522464	0.00225039
ZNF75D	female	male	202.372	140.914	176.033	0.522161	0.015086
ATP5F1A	female	male	9661.18	6728.2	8404.19	0.521974	2.29569e-06
SEMA4F	female	male	812.854	566.201	707.145	0.521757	0.00708089
MAT2A	female	male	3735.19	2602.7	3249.83	0.521168	0.000260754
SPEF2	female	male	178.039	124.107	154.925	0.520638	0.0216425
ZFP90	female	male	339.027	236.54	295.104	0.519451	0.0436137
OTOF	female	male	705.119	492.115	613.832	0.518917	0.000184109
HSPD1	female	male	2136.07	1491.72	1859.92	0.517969	0.00292019
PSMC6	female	male	1352.82	944.777	1177.95	0.517943	4.74535e-07
RBM26	female	male	1687.79	1178.75	1469.63	0.517911	2.77548e-07
SOAT1	female	male	946.543	661.088	824.205	0.517883	5.86671e-05
AP3M2	female	male	1683.33	1175.98	1465.89	0.51748	2.52598e-05
BNIP2	female	male	621.607	434.34	541.35	0.51722	0.00631752
PPCDC	female	male	286.21	199.996	249.261	0.517119	0.0428216
ITPA	female	male	457.89	320.004	398.796	0.516954	0.00626265
CCNK	female	male	329.146	230.17	286.728	0.516206	0.00847047
CPLANE1	female	male	1022.85	715.277	891.032	0.516086	0.000150624
STX3	female	male	575.238	402.293	501.119	0.515961	0.00134923
EIF2S2	female	male	1375.15	962.375	1198.25	0.5149	1.35162e-05
KCNIP2	female	male	4274.38	2991.58	3724.61	0.51481	1.08897e-05
INTS8	female	male	1898.9	1329.14	1654.72	0.51467	0.0294271
ADAMTS3	female	male	500.152	350.089	435.839	0.514662	0.0248228
MRPL36	female	male	250.009	175.047	217.883	0.514214	0.0386387
EMC8	female	male	218.324	152.92	190.294	0.51372	0.0124116
MEDAG	female	male	432.01	302.69	376.587	0.513153	0.0284417
TBC1D7	female	male	168.734	118.248	147.097	0.512906	0.0457811
CIB2	female	male	463.542	325.149	404.231	0.511558	0.00204265
WDR31	female	male	234.501	164.52	204.509	0.511237	0.0115797
FBH1	female	male	915.65	642.763	798.698	0.510525	5.97536e-05
RGS2	female	male	529.423	371.655	461.808	0.510428	0.0150993
SREK1	female	male	1731.79	1215.75	1510.63	0.510428	0.000699496
PSMG1	female	male	617.468	433.529	538.637	0.510286	0.0149324
KIF27	female	male	190.712	133.921	166.373	0.510126	0.0295998
FAM76B	female	male	338.216	237.504	295.054	0.510082	0.0193085
CCNG1	female	male	638.964	448.874	557.497	0.50943	0.00207016
SPG21	female	male	363.791	255.607	317.427	0.509235	0.0016561
ZNF248	female	male	1424.12	1000.59	1242.61	0.509192	8.3323e-05
MRPL9	female	male	405.497	284.941	353.83	0.509067	0.00661897
MBTPS2	female	male	1509.64	1061.1	1317.41	0.508625	5.29308e-05
TCIRG1	female	male	150.241	105.709	131.156	0.507116	0.0314655
ZNF705A	female	male	508.07	357.579	443.574	0.506698	0.00334224
PSMB3	female	male	797.192	561.117	696.017	0.506651	0.000879879
LIMD2	female	male	163.262	114.926	142.547	0.506431	0.0341478
TM7SF3	female	male	643.626	453.151	561.994	0.506268	0.000230028
CFAP99	female	male	314.112	221.151	274.271	0.50623	0.0235309
RAN	female	male	3424.21	2412.31	2990.54	0.505344	3.26774e-06
SLC35B3	female	male	435.742	306.984	380.56	0.505317	0.000910591
MMUT	female	male	1881.17	1326.12	1643.29	0.504383	2.57877e-05
MRPL43	female	male	426.865	300.96	372.906	0.504231	0.00436854
CCDC91	female	male	388.512	273.932	339.407	0.504079	0.00672862
VPS13A	female	male	1781.65	1256.4	1556.55	0.503926	0.000144783
SCCPDH	female	male	1368.26	965.087	1195.47	0.503587	0.000593591
TXNL4A	female	male	830.227	585.826	725.484	0.502996	0.00110966
MTERF4	female	male	267.388	188.81	233.712	0.502253	0.0234599
BIRC2	female	male	1131.78	799.088	989.198	0.502212	0.00126206
NUDT21	female	male	1752.66	1237.71	1531.97	0.501911	1.08502e-05
ZNF655	female	male	960.674	678.562	839.769	0.501595	0.00217141
H1-0	female	male	2940.79	2077.56	2570.84	0.50131	0.00100415
VWA5A	female	male	2264.75	1600.47	1980.05	0.500875	0.0230868
PRKAB2	female	male	1386.28	979.667	1212.02	0.500874	4.49686e-05
PRR14L	female	male	1822.21	1288.33	1593.4	0.500189	0.00134894
CYB561	female	male	1066.57	754.123	932.666	0.500074	0.00134124
AMZ2	female	male	324.174	229.238	283.487	0.500047	0.0119599
WDR19	female	male	497.494	351.815	435.06	0.499925	0.00193877
HNRNPA0	female	male	1562.82	1105.31	1366.75	0.499694	1.17667e-05
ORC2	female	male	593.111	419.591	518.745	0.499405	0.00123947
APBB3	female	male	1101.9	779.661	963.799	0.49914	8.71806e-05
LAS1L	female	male	650.993	460.637	569.412	0.499079	0.0107316
MDM4	female	male	911.369	644.949	797.189	0.498918	0.00858925
SYNE3	female	male	409.587	289.959	358.318	0.498391	0.0120468
RTCA	female	male	740.277	524.099	647.63	0.498274	0.000172156
TTF1	female	male	828.02	586.278	724.416	0.498093	0.00380786
GK	female	male	271.223	192.08	237.305	0.497776	0.0201158
AGTPBP1	female	male	1353.24	958.578	1184.1	0.497421	1.62959e-05
OGT	female	male	5971.17	4229.95	5224.93	0.497381	3.28281e-09
BRCC3	female	male	841.403	596.136	736.289	0.497207	0.000942283
PPP1R21	female	male	772.2	547.315	675.82	0.496652	0.000146428
ALDH2	female	male	3273.38	2320.48	2864.99	0.496356	0.00152503
RPS24	female	male	3327.13	2359.36	2912.37	0.495877	0.000246211
HTATIP2	female	male	333.202	236.294	291.67	0.49576	0.0177964
TSR2	female	male	1322.43	937.953	1157.65	0.49561	0.00101945
HNRNPLL	female	male	1118.89	793.688	979.515	0.495433	2.94879e-06
TTC5	female	male	177.046	125.651	155.02	0.494639	0.0258238
TMEM17	female	male	425.74	302.185	372.788	0.494477	0.0115797
YPEL4	female	male	634.986	450.741	556.024	0.494449	0.00115059
UBB	female	male	10242	7270.26	8968.41	0.494421	0.000543255
TAL1	female	male	258.997	183.865	226.798	0.494414	0.0276723
IER3IP1	female	male	911.956	647.474	798.606	0.494213	0.0112812
INTS10	female	male	942.658	669.303	825.506	0.494107	1.37271e-05
PFDN1	female	male	687.009	487.874	601.665	0.493848	7.52864e-05
TINF2	female	male	490.468	348.337	429.555	0.493717	0.00379314
LIAS	female	male	270.508	192.116	236.912	0.493676	0.00610522
TM2D3	female	male	541.834	384.881	474.569	0.493441	0.0415979
COPRS	female	male	486.152	345.33	425.8	0.493438	0.00386418
MKKS	female	male	560.691	398.427	491.149	0.492799	0.0221554
MNAT1	female	male	284.564	202.237	249.281	0.492689	0.0106851
CDK9	female	male	2137.16	1519.07	1872.27	0.492523	5.94024e-05
FDX2	female	male	269.473	191.572	236.087	0.492318	0.0254935
PCNX4	female	male	522.688	371.624	457.947	0.492084	0.00217627
ERLIN2	female	male	807.572	574.286	707.592	0.491882	0.00111096
SMC2	female	male	377.77	268.721	331.035	0.491419	0.00256933
PNISR	female	male	4703.55	3348.92	4123	0.490063	0.000407223
CABP1	female	male	3086.68	2197.9	2705.77	0.489963	0.00247004
C6ORF62	female	male	4144.32	2950.99	3632.89	0.48994	5.81892e-05
PSMC3	female	male	2488.99	1772.39	2181.88	0.489852	0.00177681
NKAP	female	male	218.626	155.682	191.65	0.489848	0.0202056
SNX4	female	male	743.739	529.738	652.024	0.489556	0.0274519
TBK1	female	male	821.503	585.325	720.284	0.489083	2.28904e-05
SLC30A10	female	male	376.295	268.126	329.937	0.488907	0.00203029
TAF11	female	male	605.001	431.107	530.475	0.488837	0.00124283
LACTB	female	male	354.356	252.548	310.724	0.488822	0.00408753
NSMCE4A	female	male	220.895	157.496	193.724	0.488117	0.0332075
RXRB	female	male	735.639	524.56	645.177	0.487907	0.000133212
ITGB1BP1	female	male	405.614	289.23	355.735	0.487873	0.0050291
RBM19	female	male	512.57	365.636	449.598	0.487418	0.00569633
EIF5A2	female	male	1344.96	959.668	1179.83	0.48696	0.000678077
JKAMP	female	male	567.715	405.164	498.051	0.486724	0.00232388
DHX57	female	male	2246.75	1603.53	1971.08	0.486621	1.45389e-07
RPL24	female	male	3562.96	2544.05	3126.28	0.485931	0.000707968
DLEC1	female	male	222.312	158.753	195.072	0.48583	0.0177482
HNRNPA2B1	female	male	12376.1	8838.44	10860	0.485699	8.34533e-05
IMPACT	female	male	990.075	707.784	869.093	0.48427	2.112e-05
SLC35D2	female	male	284.622	203.504	249.857	0.484171	0.0354015
ZNF566	female	male	1394.24	997.064	1224.02	0.483725	0.000829869
DDX39B	female	male	3223.15	2305.44	2829.84	0.483428	4.84383e-05
COX17	female	male	296.377	212.065	260.243	0.482829	0.0274714
RAPGEF6	female	male	1729.61	1237.79	1518.83	0.482699	0.0160931
GMFB	female	male	3065.5	2194.46	2692.19	0.482281	0.00024438
CDHR1	female	male	242.193	173.374	212.699	0.482133	0.0297315
OXSR1	female	male	759.354	543.804	666.976	0.481763	0.0160931
MTERF3	female	male	232.317	166.389	204.062	0.481577	0.0390163
RPS19	female	male	1418.62	1016.69	1246.36	0.480636	0.000891329
CHMP1B2	female	male	244.03	174.963	214.43	0.479981	0.0201333
ZNF12	female	male	958.506	687.36	842.301	0.479746	0.000409429
LAMTOR4	female	male	503.485	361.247	442.526	0.47892	0.00851933
FLT3	female	male	239.484	171.901	210.52	0.478371	0.0454589
EFHC1	female	male	2671.65	1918.28	2348.77	0.477927	0.000219481
ABCC1	female	male	508.036	364.841	446.667	0.477647	0.00603036
C2ORF42	female	male	273.011	196.098	240.049	0.477492	0.0285913
CYB5B	female	male	1303.95	936.656	1146.54	0.477313	0.000707968
HNRNPH1	female	male	5715.03	4105.27	5025.13	0.477289	3.3445e-05
SLC16A14	female	male	892.287	641.11	784.64	0.476955	0.0121527
ANAPC4	female	male	834.816	600.05	734.202	0.476465	0.000294178
ZFP28	female	male	391.998	281.909	344.817	0.475701	0.00284758
NDUFB5	female	male	928.378	667.926	816.756	0.475012	0.00929175
CHURC1	female	male	1770.92	1274.8	1558.3	0.474222	0.0025751
MALSU1	female	male	612.17	440.844	538.744	0.473654	0.00565813
COPS5	female	male	983.746	708.461	865.767	0.473558	0.000162852
CUL4B	female	male	2069.81	1490.78	1821.66	0.473458	0.000218014
FUS	female	male	4162.82	3002.71	3665.63	0.471296	0.0160749
ATAD1	female	male	1411.27	1018.57	1242.97	0.470428	2.97096e-07
LXN	female	male	1061.31	766.317	934.883	0.469803	0.00240682
ARL8B	female	male	3225.7	2329.21	2841.49	0.469768	0.000128973
CEP43	female	male	951.745	687.289	838.407	0.469705	0.00573984
EIF6	female	male	637.625	460.52	561.723	0.469367	0.000460971
BMT2	female	male	293.736	212.331	258.848	0.468249	0.0259918
NANOS3	female	male	199.16	144.042	175.538	0.467617	0.0388621
ZNHIT6	female	male	402.984	291.433	355.176	0.467472	0.0298682
UTP11	female	male	491.633	355.759	433.402	0.466643	0.0390408
NDUFA13	female	male	949.759	687.552	837.385	0.466054	0.0344931
BRMS1L	female	male	942.675	682.553	831.194	0.465821	0.00875479
PCYOX1	female	male	838.641	607.345	739.514	0.46548	0.00150641
PPP1R1B	female	male	5236.38	3793.59	4618.04	0.465001	0.000717437
TRIM23	female	male	939.194	680.604	828.37	0.464674	0.000296467
SFPQ	female	male	4011.3	2908.46	3538.65	0.463829	3.31585e-05
NTPCR	female	male	372.684	270.29	328.8	0.463527	0.012633
CD59	female	male	1700.63	1233.72	1500.53	0.463035	0.014437
ZNF259	female	male	531.191	385.494	468.75	0.462541	0.00451841
EML5	female	male	1539.35	1117.15	1358.41	0.462496	0.0363311
VWA7	female	male	937.101	680.259	827.026	0.462084	0.0270285
SMYD4	female	male	245.515	178.356	216.733	0.461201	0.0192994
SLC39A5	female	male	401.528	292.026	354.598	0.459315	0.00306663
CNK3/IPCEF1	female	male	1481.39	1078.03	1308.52	0.458527	0.0346537
ANO9	female	male	356.576	259.527	314.983	0.458336	0.0277317
UPF3A	female	male	1195.96	870.467	1056.46	0.458294	0.000139803
PLEKHA8	female	male	490.365	356.974	433.197	0.458122	0.0316842
GPN3	female	male	448.08	326.415	395.938	0.457077	0.00998864
SESN1	female	male	1234.03	898.997	1090.44	0.457021	0.00013492
IFNGR2	female	male	935.594	681.582	826.731	0.457011	0.000707968
ANGEL2	female	male	592.588	431.761	523.662	0.456824	0.0148386
ZFYVE16	female	male	1226.26	893.823	1083.79	0.456243	0.0106859
NME1	female	male	582.642	424.698	514.951	0.456164	0.00676104
CD200	female	male	1132.37	825.557	1000.88	0.455923	3.15485e-05
FXYD1	female	male	1332.96	972.59	1178.51	0.454699	0.00886164
SERAC1	female	male	723.43	528.028	639.686	0.454209	0.0361734
AUH	female	male	774.535	565.346	684.883	0.454108	0.000721255
JPT1	female	male	1421.69	1037.89	1257.2	0.453915	0.000580913
TUSC3	female	male	3257.15	2378.58	2880.62	0.453531	0.00235125
CC2D1B	female	male	758.895	554.293	671.208	0.453212	0.000141663
FLCN	female	male	1889.34	1380.4	1671.22	0.452823	1.42094e-05
POMGNT1	female	male	873.687	638.509	772.896	0.452408	0.00473901
ATL3	female	male	868.775	635.257	768.696	0.451707	0.000607895
PLEKHA2	female	male	691.682	505.835	612.033	0.451406	0.0404687
CCNT1	female	male	1417.67	1037.11	1254.57	0.450991	0.00110645
PABPN1	female	male	2668.37	1952.04	2361.37	0.450983	8.91612e-05
CNEP1R1	female	male	413.703	302.732	366.144	0.450635	0.00434016
AOPEP	female	male	478.6	350.248	423.592	0.450516	0.00761544
POLR1E	female	male	199.311	145.875	176.41	0.450226	0.0441128
TMEM65	female	male	1497.98	1096.62	1325.97	0.449988	0.000129271
HS3ST5	female	male	315.722	231.358	279.566	0.448404	0.0184775
TRAPPC4	female	male	660.617	484.209	585.014	0.448238	0.0124249
ABCC10	female	male	585.622	429.254	518.607	0.448177	0.00266841
DHX15	female	male	1582.9	1160.33	1401.8	0.448037	0.000104652
TMEM263	female	male	954.203	699.57	845.075	0.447856	0.000248736
CRK	female	male	1490.77	1092.98	1320.29	0.447823	7.8004e-05
PWWP2B	female	male	370.199	271.515	327.906	0.447438	0.00817964
PHYH	female	male	1943.2	1425.03	1721.13	0.447401	0.000257191
EVC	female	male	784.282	575.224	694.686	0.447261	0.00990465
UNC45A	female	male	650.977	477.583	576.665	0.446975	0.00993559
MATN2	female	male	787.591	577.82	697.689	0.446872	0.00182044
CDK4	female	male	274.835	201.671	243.479	0.446759	0.0480701
SNAPC3	female	male	343.203	251.847	304.051	0.446411	0.0181411
YAE1	female	male	531.227	389.865	470.643	0.446411	0.00420244
ABCB7	female	male	471.735	346.309	417.981	0.446008	0.0105479
COPS4	female	male	951.472	698.65	843.12	0.445548	0.00196976
GAPVD1	female	male	1752.56	1287.2	1553.12	0.44522	7.43583e-07
MICOS13	female	male	1168.21	858.047	1035.28	0.445202	0.00149946
NPY1R	female	male	930.033	683.22	824.256	0.444917	0.0435823
XBP1	female	male	814.132	598.133	721.561	0.444804	0.00289056
ZNF579	female	male	376.962	276.983	334.114	0.444637	0.00965542
C12ORF76	female	male	625.876	460.086	554.823	0.44402	0.00400575
C2ORF49	female	male	1003.47	737.685	889.56	0.443991	0.00261034
IFT88	female	male	633.702	465.824	561.754	0.443977	0.00117188
ARMT1	female	male	453.5	333.428	402.04	0.443809	0.0051534
HSD17B11	female	male	316.327	232.597	280.443	0.443621	0.0341478
USE1	female	male	384.985	283.062	341.303	0.443593	0.00709622
HNRNPA1	female	male	3640.99	2677.51	3228.07	0.443453	0.000618316
ADAT1	female	male	279.635	205.626	247.917	0.44343	0.0232923
RYR3	female	male	686.403	505.015	608.665	0.44269	0.00215092
RB1	female	male	771.15	567.357	683.81	0.44269	0.0496381
PBXIP1	female	male	1056.58	777.413	936.934	0.442573	0.00639867
TIAL1	female	male	1522.78	1120.59	1350.41	0.442441	2.73955e-06
PPP1R11	female	male	1861.55	1370.39	1651.05	0.441938	0.000605879
PRPS2	female	male	431.67	317.771	382.856	0.441912	0.00664402
CFAP36	female	male	804.201	592.045	713.277	0.441846	0.0224743
GNL3L	female	male	814.175	599.407	722.132	0.44182	0.0016851
TYW5	female	male	285.134	209.931	252.904	0.441722	0.0341781
NACA	female	male	2343.74	1725.76	2078.89	0.441567	0.000257191
PEX19	female	male	2647.39	1951.01	2348.94	0.440363	0.000377547
MEIS2	female	male	1221.3	900.384	1083.77	0.439743	0.0223019
ZDHHC6	female	male	377.384	278.219	334.885	0.439724	0.00704714
DNAJC9	female	male	1125.74	830.395	999.165	0.439008	5.29482e-05
TMTC4	female	male	615.575	454.282	546.449	0.438333	0.0194878
UBA2	female	male	1517.33	1119.8	1346.96	0.438326	8.85794e-06
SYTL5	female	male	429.955	317.453	381.74	0.437508	0.00480458
WDR11	female	male	1132	835.875	1005.09	0.437468	0.00199526
CNTRL	female	male	676.453	499.824	600.755	0.436662	0.00136518
TTLL3	female	male	2612.18	1930.03	2319.83	0.436656	7.70456e-05
PKD2	female	male	695.252	513.895	617.528	0.436065	0.000609901
HADHB	female	male	1164.21	860.685	1034.13	0.435763	0.00312164
DIXDC1	female	male	1481.46	1095.63	1316.1	0.435262	0.020087
ZNF706	female	male	1849.25	1367.63	1642.84	0.43524	5.37904e-05
PRPF18	female	male	714.675	528.736	634.987	0.434723	0.00489039
SDR39U1	female	male	1016.78	752.31	903.436	0.434586	0.000129267
PREPL	female	male	4254.07	3147.92	3780	0.434439	0.00224719
AP5M1	female	male	395.762	292.857	351.66	0.434401	0.0098142
TMEM70	female	male	502.66	372.302	446.793	0.433079	0.00195901
MTF2	female	male	587.522	435.257	522.266	0.432807	0.0244958
MBIP	female	male	498.746	369.549	443.376	0.43248	0.00246518
TMED8	female	male	1430.9	1060.35	1272.09	0.432431	0.000248984
DIPK2A	female	male	362.047	268.389	321.908	0.431895	0.0327173
MRPL48	female	male	370.84	275.175	329.841	0.430516	0.0130175
MT-CYB	female	male	1680.37	1247.18	1494.72	0.430086	0.00360408
KLHL3	female	male	1356.95	1007.17	1207.05	0.430075	0.0140017
GCA	female	male	339.759	252.209	302.237	0.429856	0.0336799
RFC2	female	male	727.219	540.012	646.987	0.429431	0.02406
NUP155	female	male	1122.8	834.22	999.125	0.42861	0.00844291
OGFOD1	female	male	551.031	409.386	490.326	0.428589	0.00316416
UBA6	female	male	591.405	439.404	526.262	0.428577	0.00172671
GSTA4	female	male	2389.97	1775.74	2126.73	0.428558	0.0036014
RPL7L1	female	male	737.91	548.436	656.707	0.4281	0.0141696
ARL6IP5	female	male	2446.68	1818.67	2177.53	0.427953	2.82734e-06
EPG5	female	male	861.819	640.8	767.097	0.427541	0.00207666
RCHY1	female	male	450.057	334.649	400.597	0.427525	0.016337
STMN1	female	male	4200.77	3124.04	3739.31	0.427245	0.000294178
GPBP1	female	male	2589.06	1925.59	2304.72	0.42716	1.44024e-05
PGK1	female	male	4555.35	3387.98	4055.05	0.427128	0.000321132
SH3GL3	female	male	800.415	595.422	712.561	0.42685	0.00116217
SORD	female	male	513.526	382.061	457.184	0.426577	0.00581406
PPIP5K2	female	male	747.085	555.901	665.149	0.426531	0.00501615
SNAPIN	female	male	326.512	242.961	290.704	0.426308	0.0313126
BMI1	female	male	1062.94	791.018	946.402	0.426281	0.00259103
MAGT1	female	male	365.705	272.153	325.612	0.42626	0.0109323
RAD21	female	male	4967.25	3696.8	4422.77	0.426166	3.68862e-07
HSF2	female	male	739.043	550.013	658.03	0.426148	0.000226784
TARS1	female	male	1045.91	778.634	931.362	0.42576	0.000174246
INAFM2	female	male	1284.29	956.196	1143.68	0.425633	0.000690724
KCNT2	female	male	765.776	570.169	681.945	0.425507	0.0331872
KAT2B	female	male	1454.45	1083.06	1295.29	0.425343	0.025346
KIAA1841	female	male	351.314	261.596	312.863	0.425336	0.0274018
DACT3	female	male	1690.97	1259.5	1506.05	0.425024	0.000227882
SMN1	female	male	579.859	432.027	516.503	0.424612	0.00112431
HEATR3	female	male	386.288	287.819	344.087	0.424583	0.0356809
CEP41	female	male	387.392	288.659	345.078	0.424412	0.0176507
C2CD5	female	male	1397.25	1041.36	1244.73	0.424126	0.000989132
STAT1	female	male	1270.68	947.281	1132.08	0.423709	0.0477758
ERI3	female	male	1104.81	823.815	984.382	0.423444	0.000215076
TTLL7	female	male	3383.06	2522.92	3014.43	0.423237	0.000447081
HMGN1	female	male	427.948	319.36	381.41	0.422278	0.0100589
BRWD1	female	male	2615.93	1952.15	2331.45	0.422271	0.000484596
ZNF184	female	male	394.56	294.441	351.652	0.422204	0.0167169
MGST3	female	male	1044.85	779.78	931.246	0.422153	0.00110966
DMXL2	female	male	4429.16	3305.68	3947.67	0.422082	0.00082966
RARS2	female	male	267.203	199.481	238.179	0.421546	0.0371259
NUP93	female	male	1371.23	1023.86	1222.36	0.421472	0.00111926
PRPF3	female	male	642.269	479.798	572.639	0.420779	0.0230961
PIGG	female	male	436.209	326.003	388.977	0.420189	0.0182134
PIGV	female	male	339.376	253.68	302.65	0.419846	0.020034
MRPL3	female	male	745.503	557.294	664.842	0.419757	0.00234369
AIFM1	female	male	586.396	438.466	522.997	0.41947	0.00407239
PPA2	female	male	299.971	224.315	267.547	0.419263	0.0140974
P2RX5	female	male	985.54	737.172	879.097	0.418936	0.00929175
TMED5	female	male	637.112	476.734	568.378	0.418361	0.00305426
VPS26C	female	male	741.266	554.693	661.306	0.418222	0.0336391
AKIP1	female	male	668.472	500.317	596.406	0.418053	0.0204353
KRTCAP2	female	male	365.539	273.585	326.13	0.418042	0.0349382
RBM6	female	male	917.608	686.837	818.706	0.417934	0.00896497
PDE6B	female	male	1879.16	1407.06	1676.83	0.417431	0.000565662
VDAC2	female	male	2951.66	2211.05	2634.25	0.416778	2.88147e-05
WDR92	female	male	317.735	238.066	283.591	0.416384	0.0346284
PWP2	female	male	568.106	425.833	507.132	0.415892	0.0204353
TMUB2	female	male	376.415	282.214	336.043	0.415393	0.0132175
ZFP30	female	male	750.258	562.628	669.845	0.415253	0.0458045
TET2	female	male	798.225	598.721	712.723	0.414945	0.0391077
IFT80	female	male	502.066	376.796	448.379	0.414031	0.0117614
TSTD3	female	male	432.922	325.03	386.682	0.413487	0.0480387
PHTF2	female	male	383.638	288.09	342.689	0.413278	0.0215849
SPCS2	female	male	884.783	664.401	790.333	0.413218	0.0253468
MRPL11	female	male	444.327	333.665	396.9	0.41319	0.00588251
C20ORF194	female	male	1746.16	1311.29	1559.79	0.413182	0.000967495
DCAF17	female	male	360.696	270.897	322.211	0.41317	0.0244669
MFSD14B	female	male	478.241	359.512	427.357	0.411746	0.0151795
EYA3	female	male	484.144	363.988	432.648	0.411607	0.00691801
KIFBP	female	male	956.963	719.428	855.162	0.4116	0.000178707
MTREX	female	male	901.072	677.433	805.227	0.411541	0.000195851
NT5C3A	female	male	409.664	308	366.093	0.411518	0.0274714
CACNA2D1	female	male	2826.43	2125.08	2525.85	0.411464	0.0162546
CDC14B	female	male	288.11	216.646	257.482	0.411449	0.0255045
LTN1	female	male	1732.3	1302.65	1548.17	0.411228	0.0209804
ALG9	female	male	655.182	492.709	585.55	0.411103	0.0212254
BCL2L2	female	male	2475.71	1861.88	2212.64	0.411088	2.39082e-05
WRN	female	male	417.666	314.164	373.308	0.410956	0.037256
ZNF197	female	male	477.422	359.078	426.703	0.410946	0.0274714
EMC4	female	male	803.651	604.578	718.334	0.410588	0.0124082
CCZ1	female	male	488.225	367.35	436.421	0.410389	0.00708089
NAP1L4	female	male	1627.12	1224.44	1454.55	0.410166	0.000245155
MSANTD4	female	male	749.601	564.134	670.115	0.410067	0.000375238
PRRG3	female	male	565.026	425.265	505.129	0.409964	0.0194595
ZNF318	female	male	1404.01	1056.76	1255.19	0.409942	0.000991591
PRKACA	female	male	1376.22	1035.95	1230.39	0.409762	0.00187755
LMTK3	female	male	3431	2583.21	3067.66	0.409469	8.59919e-06
TANGO6	female	male	314.058	236.547	280.839	0.4088	0.0219725
ALG13	female	male	1008.1	759.414	901.52	0.408646	0.00708202
IVD	female	male	590.249	444.663	527.855	0.408643	0.0204353
RALA	female	male	940.254	708.505	840.933	0.408303	0.000251667
NECAB1	female	male	1772.29	1335.59	1585.14	0.408124	0.0335816
PM20D2	female	male	783.47	590.654	700.834	0.407614	0.020135
NUP133	female	male	316.98	239.062	283.587	0.406989	0.0492796
EML1	female	male	700.014	528.047	626.314	0.406781	0.0280407
SFMBT1	female	male	549.934	414.961	492.088	0.40644	0.0144679
TMEM200A	female	male	383.368	289.266	343.039	0.406341	0.0421561
DCAF12	female	male	659.982	497.96	590.544	0.40632	0.00303145
PBDC1	female	male	574.339	433.573	514.011	0.405645	0.0034413
ZNF207	female	male	3531.31	2665.84	3160.39	0.405624	0.00447737
NEPRO	female	male	745.735	563.02	667.429	0.405436	0.00800176
STXBP3	female	male	627.494	473.837	561.641	0.405232	0.00707751
SRSF9	female	male	539.294	407.412	482.773	0.40464	0.0371647
MRPS18C	female	male	350.88	265.116	314.124	0.404535	0.0330906
FBXO10	female	male	1132.87	855.919	1014.18	0.404419	0.000162682
MMADHC	female	male	689.017	520.637	616.854	0.404229	0.00542497
ZKSCAN8	female	male	1636.37	1236.66	1465.07	0.404085	0.00914611
LIMK2	female	male	631.926	477.755	565.852	0.403558	0.0209341
ACVR1	female	male	663.912	501.929	594.491	0.403526	0.00599752
NAP1L1	female	male	2905.29	2197.69	2602.04	0.402692	0.0038484
SCFD1	female	male	512.423	387.694	458.968	0.40246	0.00597327
ETFA	female	male	634.458	479.994	568.259	0.402401	0.0174532
TMEM165	female	male	845.694	640.182	757.617	0.401617	0.00117218
MARCHF7	female	male	965.663	731.07	865.124	0.401509	0.0058915
CCNL2	female	male	1091.24	826.185	977.648	0.401502	0.00106902
PSMC5	female	male	2117.11	1602.91	1896.74	0.401403	0.0356374
MAPK14	female	male	471.011	356.69	422.016	0.401137	0.0111555
CHORDC1	female	male	1052.22	796.943	942.818	0.400863	0.00215195
GCSH	female	male	258.955	196.124	232.027	0.400833	0.0306374
KCNK4	female	male	477.6	361.763	427.956	0.400728	0.0357264
CCT6A	female	male	2592.08	1965.32	2323.47	0.399339	3.05546e-05
PPP1CB	female	male	10045.6	7616.71	9004.62	0.399315	1.05386e-05
PQBP1	female	male	485.322	367.955	435.022	0.399292	0.0203425
VEZT	female	male	691.274	524.369	619.743	0.398702	0.00528806
SHPRH	female	male	894.827	678.83	802.257	0.398566	0.0193085
SKP1	female	male	6098.83	4626.73	5467.93	0.398542	0.00975795
NEDD8	female	male	945.899	717.954	848.208	0.397762	0.017323
ASL	female	male	405.573	307.982	363.748	0.397179	0.0174499
MTMR9	female	male	1869.4	1420.31	1676.94	0.396372	0.00248981
TRPM7	female	male	1016.25	772.494	911.785	0.39572	0.00227543
ZMAT3	female	male	1135.86	863.593	1019.17	0.395349	0.0236901
SOX2	female	male	1240.37	943.104	1112.97	0.39528	0.00721428
SLC7A14	female	male	2612.76	1987.31	2344.71	0.394751	0.000550403
SLC4A7	female	male	1522.38	1158.02	1366.23	0.394727	0.0231529
ARFIP1	female	male	400.097	304.363	359.068	0.394611	0.0299244
CERT1	female	male	1398.29	1063.77	1254.93	0.394521	0.00334788
ARHGAP21	female	male	6570.4	4999.29	5897.07	0.394254	0.00276879
RTN3	female	male	21345	16242.1	19158	0.39416	0.000137767
RARS1	female	male	494.744	376.553	444.091	0.393775	0.0311127
ELOF1	female	male	667.347	508.086	599.093	0.393391	0.0170544
HEATR5A	female	male	468.007	356.341	420.15	0.393178	0.00608634
U2SURP	female	male	1573.7	1198.49	1412.9	0.393002	0.000504735
NDUFAF4	female	male	849.654	647.105	762.848	0.392863	0.00233657
DNAJB14	female	male	632.425	481.746	567.848	0.392639	0.0230961
TBC1D32	female	male	355.462	270.795	319.176	0.392302	0.0381914
ELF2	female	male	726.264	553.401	652.18	0.39224	0.00197602
SMIM12	female	male	801.801	610.993	720.026	0.392063	0.00149946
FAF1	female	male	833.653	635.317	748.652	0.391923	0.00571539
PIGF	female	male	335.169	255.595	301.066	0.391061	0.0450382
NOL8	female	male	451.105	344.127	405.257	0.390449	0.0215849
USP48	female	male	1758.11	1341.3	1579.48	0.390409	0.00225415
ADPRS	female	male	1046.15	798.552	940.034	0.389658	0.000251667
AGL	female	male	761.862	581.601	684.608	0.38953	0.0112573
DLAT	female	male	2369.59	1809.09	2129.38	0.389359	0.000404044
RPS13	female	male	1585.23	1210.7	1424.72	0.388832	0.011733
VPS50	female	male	817.12	624.098	734.396	0.388795	0.016337
PAFAH1B1	female	male	11029.4	8424.11	9912.84	0.388756	0.000142004
ATP5IF1	female	male	1634.19	1248.37	1468.84	0.388501	0.00817006
CLASRP	female	male	838.784	640.981	754.012	0.388008	0.00342691
MLH1	female	male	1084.29	828.632	974.723	0.387945	0.018247
SNRPF	female	male	429.73	328.507	386.349	0.387532	0.028569
YIPF5	female	male	695.506	531.762	625.33	0.387322	0.0098142
ARGLU1	female	male	3414.83	2612.53	3070.99	0.386376	0.0173877
FAM149A	female	male	808.823	618.836	727.4	0.386274	0.0322212
NIFK	female	male	354.83	271.49	319.113	0.386168	0.0146836
ZNF621	female	male	662.277	506.777	595.634	0.386091	0.0173452
SHLD2	female	male	429.585	328.759	386.374	0.385981	0.0168523
CSRNP2	female	male	2169.03	1660.02	1950.88	0.385868	7.5281e-05
CCNC	female	male	636.015	487.034	572.166	0.385055	0.00864774
HARS1	female	male	840.118	643.46	755.836	0.38468	0.00330984
RPS20	female	male	2172.87	1664.84	1955.14	0.38419	0.00483081
FAM53A	female	male	807.617	618.825	726.706	0.384181	0.0202167
MPP5	female	male	343.116	262.907	308.741	0.384132	0.0355944
THOC2	female	male	731.8	560.764	658.499	0.384132	0.00395014
SLC39A10	female	male	5456.36	4181.87	4910.15	0.3838	0.00853278
PTMS	female	male	3244.85	2487.16	2920.13	0.383654	0.00151806
HAUS2	female	male	346.579	265.723	311.927	0.383301	0.0296343
ATG4C	female	male	495.538	379.93	445.991	0.383196	0.0124889
DYNC2I1	female	male	675.575	518.018	608.051	0.383139	0.0152204
SLC9A5	female	male	790.085	606.204	711.279	0.382239	0.00300835
VAPA	female	male	3459.93	2654.74	3114.85	0.382184	2.75013e-06
GALE	female	male	377.659	289.962	340.074	0.381395	0.0387481
ANKRD26	female	male	638.753	490.443	575.191	0.381119	0.0108194
NECTIN2	female	male	377.839	290.152	340.259	0.38092	0.038731
SLF2	female	male	869.237	667.639	782.838	0.380735	0.00262978
EID2	female	male	488.24	375.047	439.729	0.380542	0.00583654
DERL1	female	male	1189.39	913.962	1071.35	0.379988	0.00059508
ARHGAP5	female	male	3151.61	2423	2839.35	0.379285	0.0275591
UBE2M	female	male	1951.13	1500.53	1758.02	0.37884	0.00696934
TBC1D23	female	male	904.276	695.652	814.866	0.378479	0.00165288
RBBP5	female	male	1514.28	1164.89	1364.54	0.378435	0.00225211
UTP3	female	male	356.066	273.91	320.857	0.378425	0.0259455
DUSP26	female	male	1650.95	1270.33	1487.83	0.378117	0.0136443
DPP10	female	male	1560.29	1201.11	1406.36	0.377456	0.0052908
ACSL4	female	male	2195.37	1690.49	1978.99	0.377026	0.000417878
AP4B1	female	male	504.951	388.838	455.188	0.376986	0.0105479
FAM162A	female	male	873.521	673.062	787.61	0.37615	0.00523508
PRR3	female	male	406.901	313.817	367.008	0.374837	0.0192654
STAG1	female	male	556.302	429.109	501.791	0.374468	0.0415262
CPSF3	female	male	789.613	609.336	712.351	0.373934	0.0400266
SERINC5	female	male	1069.62	825.469	964.986	0.373802	0.022556
ZNF667	female	male	438.097	338.175	395.273	0.373464	0.0437491
SCOC	female	male	3779.24	2918.12	3410.19	0.373068	0.000468786
UBE2J2	female	male	507.043	391.615	457.574	0.37258	0.0136235
COMMD3	female	male	684.036	528.43	617.348	0.37238	0.0400785
PTPN5	female	male	3581.14	2768.57	3232.89	0.371289	4.08607e-05
NDUFA7	female	male	674.201	521.22	608.638	0.371248	0.0342376
ARMC8	female	male	1373.91	1062.52	1240.46	0.370851	0.0030226
ELFN2	female	male	3565.14	2757.63	3219.07	0.370527	0.0290121
AAMP	female	male	1484.46	1148.45	1340.46	0.370244	0.0199562
NDUFAF2	female	male	774.665	599.371	699.539	0.37006	0.00244161
RRP1B	female	male	1027.17	794.907	927.63	0.369881	0.00334224
TMEM269	female	male	1068.74	827.1	965.177	0.369742	0.0162546
PAN3	female	male	976.138	755.474	881.568	0.369734	0.0124154
NCKAP1	female	male	6800.14	5263.65	6141.64	0.369497	0.000256387
TSPAN17	female	male	384.227	297.5	347.059	0.36899	0.0234244
TBC1D12	female	male	922.636	714.635	833.493	0.368598	0.00836404
MXRA7	female	male	924.163	715.943	834.926	0.368331	0.0090481
ZFP57	female	male	1205.59	934.238	1089.29	0.367834	0.0101464
ERICH3	female	male	1027.05	796.226	928.127	0.36725	0.0222172
GPRIN3	female	male	1237.78	959.997	1118.73	0.366654	0.0394683
DENND1B	female	male	1327.18	1029.37	1199.54	0.366615	0.032534
DENR	female	male	738.007	572.505	667.077	0.366428	0.00631988
PPP1R1A	female	male	755.035	585.707	682.466	0.36631	0.0248878
GLT1D1	female	male	823.347	638.763	744.24	0.366205	0.0135246
RPL30	female	male	1973.27	1531.12	1783.78	0.365994	0.0241346
MFSD1	female	male	804.337	624.724	727.36	0.364687	0.0273561
SNRNP70	female	male	6848.37	5323.69	6194.93	0.363339	0.00551677
DDX5	female	male	13912.5	10815.9	12585.4	0.363222	0.000127072
FOCAD	female	male	820.438	637.944	742.226	0.363058	0.028569
SFXN1	female	male	1498.3	1165.31	1355.59	0.36256	0.00836404
CGN	female	male	553.035	430.207	500.394	0.362399	0.0271376
TPST1	female	male	331.178	257.73	299.7	0.361786	0.0487683
PRICKLE4	female	male	1751.23	1363.4	1585.02	0.361174	0.0098142
HACD2	female	male	836.699	651.568	757.357	0.360758	0.0487212
GTF2E1	female	male	785.038	611.425	710.633	0.360528	0.013844
SNX17	female	male	979.543	763.347	886.888	0.359737	0.0138067
KLHL12	female	male	1097.16	855.157	993.443	0.359493	0.00271731
CCDC71L	female	male	584.541	455.652	529.303	0.359435	0.030873
ZDBF2	female	male	1574.6	1227.38	1425.79	0.359425	0.028445
POLI	female	male	571.499	445.538	517.516	0.359283	0.0344647
TRMT61A	female	male	627.037	489.094	567.918	0.358393	0.00636147
CMAS	female	male	1835.39	1432.25	1662.61	0.357802	0.0281225
ZBED6	female	male	3579.9	2795.15	3243.58	0.357005	0.0236901
PTGES3	female	male	2651.45	2071.36	2402.84	0.356186	0.000721255
NOL7	female	male	546.66	427.088	495.415	0.356045	0.0229635
ZZZ3	female	male	748.835	585.218	678.713	0.355699	0.0126128
UGP2	female	male	1570.14	1227.95	1423.49	0.354643	0.025782
SLC35B1	female	male	568.866	444.981	515.773	0.354368	0.0136371
WDR5	female	male	1075.53	841.808	975.364	0.353534	0.0012706
FNBP4	female	male	1101.76	863.129	999.49	0.352223	0.0221586
ZDHHC20	female	male	1974.85	1547.2	1791.57	0.352079	0.0484651
GGPS1	female	male	529.91	415.166	480.734	0.352026	0.0136975
AIG1	female	male	828.73	649.34	751.848	0.351939	0.0245485
NAA35	female	male	779.388	610.751	707.115	0.351805	0.00424432
CNOT6L	female	male	1196.03	937.751	1085.34	0.350982	0.018247
PDAP1	female	male	1188.11	931.769	1078.25	0.350626	0.0102758
GPR162	female	male	1962.84	1539.39	1781.36	0.350607	0.000669846
YARS1	female	male	2134.8	1674.85	1937.68	0.350054	0.0331095
INSIG1	female	male	613.124	481.152	556.565	0.349631	0.0420296
AP3S1	female	male	739.633	580.702	671.52	0.349098	0.02984
PHF6	female	male	756.109	593.712	686.51	0.348858	0.0240241
RPRD1B	female	male	817.442	641.944	742.229	0.34865	0.0207081
ERCC6L2	female	male	1015.36	797.541	922.008	0.348284	0.00709874
TUT7	female	male	4112.51	3230.49	3734.5	0.348255	0.000452851
CCT2	female	male	2278.75	1790.6	2069.54	0.3478	0.0124923
HAUS3	female	male	573.501	450.662	520.856	0.347748	0.031394
RUNDC3B	female	male	1557.1	1223.68	1414.21	0.347682	0.00186659
ANKRD10	female	male	2593.35	2038.31	2355.48	0.347465	0.010833
SCPEP1	female	male	577.396	453.868	524.455	0.347373	0.0390715
ULK3	female	male	681.688	535.902	619.208	0.347214	0.0181411
ZKSCAN7	female	male	887.278	697.671	806.018	0.34687	0.0342008
KCNT1	female	male	4364.31	3431.86	3964.69	0.346761	0.0244764
HDGFL3	female	male	2344.17	1843.47	2129.58	0.346645	0.000493476
ITSN2	female	male	1160.26	913.552	1054.53	0.344907	0.00742513
YTHDC1	female	male	1475.7	1162.01	1341.26	0.344818	0.000989132
VPS4B	female	male	1019.03	802.597	926.272	0.344459	0.00131978
LMO4	female	male	3073.05	2420.49	2793.38	0.344378	0.00412035
COMMD6	female	male	653.72	515.003	594.27	0.344102	0.031922
HEATR1	female	male	632.332	498.592	575.015	0.342888	0.00829994
YPEL2	female	male	1087.26	857.49	988.789	0.342543	0.0118134
PPIB	female	male	937.867	739.852	853.003	0.342143	0.0106154
GRAMD1B	female	male	5264.57	4154.09	4788.65	0.341776	0.0462203
CEP350	female	male	1727.19	1363.16	1571.18	0.34151	0.0306771
RPL10	female	male	1895.78	1496.39	1724.61	0.341311	0.0010294
PGRMC2	female	male	967.61	763.826	880.274	0.341158	0.0109688
AMN1	female	male	805.388	635.926	732.762	0.340873	0.00784033
MRPL14	female	male	659.866	521.1	600.395	0.340519	0.0260055
SAE1	female	male	1268.27	1001.86	1154.09	0.340176	0.0338858
FKBP15	female	male	494.508	390.672	450.007	0.340109	0.0168235
ATL2	female	male	1327.06	1048.47	1207.66	0.33996	0.0452897
FBXL5	female	male	1541.71	1218.43	1403.17	0.339552	0.000754968
NAB2	female	male	756.765	598.121	688.775	0.339451	0.0169698
SNCA	female	male	2421.63	1913.95	2204.05	0.339424	0.0198455
CCDC12	female	male	1408.7	1113.5	1282.19	0.339229	0.028994
ACTN2	female	male	940.772	743.622	856.279	0.339225	0.0145321
ASAH1	female	male	776.908	614.513	707.31	0.338265	0.0254647
BRCA2	female	male	2340.25	1851.55	2130.81	0.337945	0.0150294
SPAG1	female	male	977.252	773.192	889.798	0.337902	0.00727277
ITGB7	female	male	636.329	503.745	579.507	0.337098	0.0203131
ATXN7L2	female	male	711.775	563.56	648.254	0.336906	0.0208193
DPY19L3	female	male	2819.09	2232.68	2567.77	0.336458	0.000593285
PEX11B	female	male	1764	1397.75	1607.03	0.335759	0.00844975
SLC5A6	female	male	736.052	583.278	670.578	0.335631	0.0440258
FLNB	female	male	1623.47	1287.24	1479.37	0.334828	0.0140017
PDCD6	female	male	795.266	630.869	724.81	0.334107	0.00424574
RASSF4	female	male	953.644	756.609	869.201	0.333842	0.030873
ZNF444	female	male	866.01	687.428	789.475	0.33326	0.0345197
PTPA	female	male	4179.84	3317.94	3810.45	0.333154	0.0131504
FDFT1	female	male	1119.56	888.749	1020.64	0.333081	0.00994433
APEX1	female	male	1142.83	907.574	1042.01	0.332504	0.0192654
FAM193B	female	male	819.53	650.834	747.231	0.332496	0.0226663
MRPL51	female	male	3149.98	2501.69	2872.14	0.332416	0.00871273
LMLN	female	male	555.378	441.12	506.41	0.33222	0.0440621
KPNA3	female	male	1392.47	1106.86	1270.06	0.331193	0.00216211
USP16	female	male	625.602	497.285	570.609	0.331131	0.021799
MARCHF6	female	male	4607.7	3665.76	4204.01	0.329931	0.00692282
STRN3	female	male	859.963	684.474	784.753	0.329267	0.00457305
CDK11B	female	male	1277.24	1016.75	1165.6	0.329082	0.0276452
NHP2	female	male	1311.33	1044.04	1196.78	0.328823	0.00571765
SPAG9	female	male	6242.36	4970.65	5697.34	0.328665	0.00015102
MFSD11	female	male	1457.69	1161.05	1330.56	0.328283	0.0292185
ATL1	female	male	1752.71	1396.07	1599.86	0.328191	0.0160695
ATG2B	female	male	2607.09	2076.78	2379.82	0.328087	0.000656937
DNAJC13	female	male	887.373	706.909	810.031	0.327996	0.0037662
FBXL2	female	male	662.93	528.236	605.204	0.327737	0.0194664
ZNF550	female	male	956.204	762.01	872.978	0.327561	0.0496965
ARMCX1	female	male	505.954	403.191	461.913	0.327548	0.036284
KLHL23	female	male	1846.56	1472.01	1686.04	0.327076	0.0132264
FAM120C	female	male	644.912	514.253	588.915	0.326648	0.0299114
TP53I3	female	male	884.893	705.735	808.111	0.326451	0.0137826
RNF14	female	male	1397.38	1114.43	1276.12	0.326408	0.00172605
FARSB	female	male	914.474	729.656	835.266	0.325716	0.0197129
CNOT6	female	male	1181.25	942.55	1078.95	0.325693	0.0172124
RER1	female	male	489.126	390.416	446.822	0.325203	0.0213022
OSBPL8	female	male	1810.22	1445.1	1653.74	0.32502	0.00580121
ELP2	female	male	628.687	502.017	574.4	0.324673	0.0159346
SEPHS2	female	male	532.516	425.368	486.595	0.324158	0.0360231
PDXDC1	female	male	712.306	569.008	650.893	0.324077	0.0295998
NDFIP1	female	male	11284.6	9014.78	10311.8	0.323993	0.00144329
NOS1AP	female	male	2131.65	1704.34	1948.52	0.322764	0.0267846
ZNF454	female	male	626.551	500.987	572.738	0.322671	0.0153391
ERMP1	female	male	927.598	741.859	847.996	0.322353	0.0151384
HERC3	female	male	2392.62	1913.79	2187.41	0.322146	0.0323578
PPP4R4	female	male	1500.36	1200.56	1371.88	0.321593	0.0401502
CDK7	female	male	1103.96	883.36	1009.42	0.321579	0.00892117
PSMD8	female	male	1861.79	1490.63	1702.72	0.320758	0.0285386
EML6	female	male	552.879	442.708	505.663	0.320594	0.0293621
MATR3	female	male	11603.3	9293.56	10613.4	0.320231	4.34866e-05
STOML2	female	male	775.987	621.799	709.906	0.31955	0.0196912
SNX13	female	male	1603.38	1285.07	1466.96	0.319256	0.0415078
SF3A2	female	male	1038.76	832.597	950.405	0.319163	0.0428189
CDK10	female	male	682.296	546.942	624.287	0.319063	0.0289537
ABCB10	female	male	612.015	490.864	560.094	0.318237	0.0261543
UBE2B	female	male	1881.92	1510.48	1722.73	0.317219	0.000493923
CARMIL1	female	male	613.552	492.433	561.644	0.317181	0.0182377
EEF2K	female	male	2805.31	2252.07	2568.21	0.316895	0.0488171
SUCLG1	female	male	1200.88	964.254	1099.47	0.316589	0.0200044
CCDC88A	female	male	1745.85	1402.28	1598.61	0.316175	0.0098142
CCNT2	female	male	1437.62	1155.03	1316.51	0.315778	0.0215027
TRMT1L	female	male	574.565	461.713	526.2	0.315482	0.0415979
ARL14EP	female	male	762.175	612.554	698.052	0.315314	0.0187682
RPL17	female	male	2492.55	2003.87	2283.12	0.31481	0.0142376
SLC30A5	female	male	1004.79	807.998	920.452	0.314557	0.0358928
CHMP5	female	male	1075.75	865.019	985.435	0.314522	0.0094664
SERINC1	female	male	13835.8	11129.7	12676	0.313995	1.69963e-05
GGCX	female	male	1080.72	869.54	990.213	0.313651	0.0277798
VCPIP1	female	male	1386.38	1115.87	1270.45	0.313159	0.0299285
ZNF410	female	male	610.197	491.171	559.186	0.313133	0.0279047
RPAP2	female	male	1163.05	936.319	1065.88	0.312869	0.0127918
ECE2	female	male	2197.64	1770.06	2014.39	0.312159	0.0021843
ABCD3	female	male	1165.65	939.557	1068.76	0.31104	0.0103495
MMTAG2	female	male	1220.08	983.476	1118.68	0.310998	0.014135
RASA1	female	male	1546.9	1246.98	1418.37	0.310963	0.0388721
DHX36	female	male	1411.8	1138.27	1294.58	0.310695	0.0116576
UBE3C	female	male	2027.13	1634.46	1858.84	0.310602	0.00626268
EEF1B2	female	male	1586.06	1278.87	1454.41	0.310583	0.0178633
DNAJC10	female	male	1070.84	863.6	982.021	0.310299	0.0293429
SLC3A1	female	male	983.793	793.777	902.358	0.30964	0.0465745
MKLN1	female	male	2158.32	1741.48	1979.67	0.309581	0.00507595
KDM5C	female	male	1868.74	1508.19	1714.22	0.30923	0.0209341
NUDT4B	female	male	2653.53	2141.94	2434.28	0.308992	0.000887391
RENBP	female	male	746.372	602.727	684.81	0.308383	0.0228852
ASNSD1	female	male	802.277	647.954	736.139	0.308171	0.0419354
RBM12	female	male	1145.11	924.907	1050.74	0.308166	0.0142147
RBMX	female	male	2711.04	2189.77	2487.64	0.30808	0.00205996
GLS2	female	male	542.321	438.149	497.676	0.307715	0.0414234
RCAN1	female	male	1265.85	1022.87	1161.71	0.307477	0.0497994
BTK	female	male	587.777	475.008	539.447	0.307295	0.0375885
C1ORF52	female	male	1218.32	984.651	1118.18	0.307171	0.0216357
SUCLA2	female	male	3098.54	2504.31	2843.87	0.307159	0.0036414
GART	female	male	993.87	803.318	912.205	0.307093	0.0281714
TPD52L2	female	male	790.142	638.667	725.224	0.307058	0.0419354
ALAD	female	male	1290.14	1043	1184.22	0.306731	0.0471435
RMND5A	female	male	3507.31	2836.5	3219.82	0.306249	0.00994083
SLC44A1	female	male	1706.08	1380.25	1566.44	0.305747	0.0284417
RPS3	female	male	5241.24	4241.5	4812.78	0.305329	0.0151967
ZNF84	female	male	1428.66	1156.22	1311.9	0.305241	0.0150226
TMEM87A	female	male	1007.51	815.469	925.205	0.305072	0.00865329
EVI5	female	male	881.563	713.57	809.566	0.304971	0.0312375
SRPK2	female	male	1915.92	1550.93	1759.5	0.30491	0.0166902
PIN1	female	male	1537.98	1245.12	1412.47	0.304745	0.011144
TAF9	female	male	937.326	759.025	860.911	0.304368	0.0227327
TASOR2	female	male	1994.82	1615.85	1832.4	0.303978	0.0293429
SLITRK4	female	male	1169.66	947.941	1074.64	0.303206	0.0292172
MAGED2	female	male	2691.61	2181.56	2473.01	0.303099	0.0180815
FAM184A	female	male	686.109	556.373	630.508	0.302381	0.0299948
CYP51A1	female	male	839.404	680.97	771.504	0.301735	0.0326164
AZIN1	female	male	3739.71	3035.3	3437.82	0.301087	0.0340552
ZNF658	female	male	629.382	510.879	578.595	0.300942	0.0417802
MARS1	female	male	489.895	397.729	450.395	0.300678	0.0371664
BBS2	female	male	675.587	548.555	621.145	0.300544	0.0223019
KITLG	female	male	720.346	584.914	662.303	0.300463	0.039898
TRAPPC13	female	male	1495.52	1214.6	1375.12	0.300171	0.00813885
CAP1	female	male	3189.16	2595.07	2934.55	0.297417	0.0121805
MFN1	female	male	2643.31	2151	2432.32	0.297347	0.0116692
SLC37A3	female	male	585.465	476.473	538.754	0.29721	0.0294734
PNMA8A	female	male	2573.86	2095.01	2368.64	0.296953	0.0363311
TOMM40	female	male	1048.44	853.46	964.877	0.296858	0.00787525
DNAAF2	female	male	2204.93	1795.33	2029.39	0.296481	0.0108949
SPRY2	female	male	1054.61	859.365	970.931	0.295388	0.0449111
TBRG1	female	male	1465.1	1194.19	1348.99	0.295007	0.0467359
MAP2K7	female	male	1093.1	891.203	1006.57	0.294569	0.016738
NKRF	female	male	738.459	602.344	680.124	0.293885	0.0311053
PDE1C	female	male	1163.41	950.157	1072.02	0.292057	0.045643
CRCP	female	male	603.348	492.843	555.989	0.291896	0.0436577
CPSF6	female	male	2148.82	1756.33	1980.61	0.290996	0.0286417
DNM1L	female	male	3402.09	2784.71	3137.5	0.288882	0.000983078
SCG5	female	male	4375.69	3581.76	4035.43	0.288854	0.0493423
SLC39A14	female	male	760.433	622.887	701.485	0.287888	0.0416212
COPS2	female	male	1333.61	1092.5	1230.28	0.287693	0.0172478
DHX40	female	male	845.141	692.499	779.723	0.287384	0.03247
TMEM184C	female	male	1228.64	1007.24	1133.75	0.286639	0.0201018
NEIL1	female	male	1859.26	1524.69	1715.87	0.286227	0.0293898
PLXNC1	female	male	1195.57	981.336	1103.76	0.284939	0.012633
HNRNPA3	female	male	7065.61	5799.34	6522.93	0.284932	0.000434742
PRPS1	female	male	958.903	787.137	885.289	0.28474	0.0176358
C17ORF75	female	male	1581.67	1298.8	1460.44	0.284281	0.0066622
GPR27	female	male	1543.89	1268.6	1425.91	0.283324	0.00528912
SDHB	female	male	1605.5	1320.61	1483.4	0.281822	0.0249878
GPR155	female	male	1074.92	884.188	993.177	0.281775	0.0463974
AXIN2	female	male	660.406	543.301	610.218	0.281646	0.0441059
PNN	female	male	1368.31	1126.3	1264.59	0.280837	0.0209271
POLR2B	female	male	1379.82	1135.79	1275.24	0.280819	0.0147513
ATP6V1C1	female	male	3415.1	2812.06	3156.66	0.280298	0.0220884
SRSF5	female	male	5886.25	4849.02	5441.72	0.279653	0.0375608
PSMC1	female	male	1731.16	1427.34	1600.95	0.278396	0.0420857
GPATCH2L	female	male	1203.83	993.685	1113.77	0.276812	0.0383958
RRAGD	female	male	3538.51	2921.54	3274.1	0.276432	0.0283089
SPTLC2	female	male	1050.67	867.728	972.264	0.275941	0.0129071
SUPT16H	female	male	1996.69	1650.11	1848.16	0.275027	0.00454944
PPP3R1	female	male	11580.9	9572.4	10720.1	0.274794	0.00133844
MTMR6	female	male	1850.58	1530.22	1713.29	0.274211	0.0198457
IPO5	female	male	2019.7	1670.78	1870.16	0.273607	0.00587713
GABARAPL1	female	male	9362.64	7746.57	8670.04	0.273356	0.0330933
SEC23B	female	male	1537.77	1272.58	1424.12	0.273102	0.0163422
NT5DC1	female	male	10356.8	8572.46	9592.09	0.2728	0.00396255
NDUFB6	female	male	836.649	693.167	775.157	0.271382	0.0466554
TAGLN3	female	male	3187.77	2643.18	2954.37	0.270268	0.0288752
HLTF	female	male	1299.25	1077.42	1204.18	0.270141	0.0388331
TCP11L2	female	male	1819.19	1508.67	1686.11	0.270005	0.0252583
SUGP2	female	male	2501	2075.13	2318.49	0.269292	0.00982807
YME1L1	female	male	2210.87	1834.39	2049.52	0.269291	0.00523201
WDR70	female	male	748.804	621.414	694.208	0.26909	0.0438856
GPM6B	female	male	17405.4	14444.5	16136.4	0.269011	0.00602338
FN3K	female	male	1841.1	1528.07	1706.94	0.268852	0.0270733
ATP6V0B	female	male	2061.84	1711.92	1911.88	0.268325	0.03247
CHIC1	female	male	905.339	752.209	839.712	0.267307	0.0445436
FSTL1	female	male	1523	1265.88	1412.81	0.266752	0.0277798
ARCN1	female	male	1898.45	1578.1	1761.15	0.26663	0.00640118
MTCH1	female	male	6152.57	5117.62	5709.02	0.265713	0.0377487
ZMYM2	female	male	1985.15	1651.62	1842.21	0.265363	0.0186145
YLPM1	female	male	2490.64	2072.8	2311.56	0.264947	0.00651334
NXF1	female	male	2366.08	1972.22	2197.28	0.262689	0.0166301
SNX14	female	male	3920.11	3269.74	3641.38	0.261726	0.0109976
VDAC1	female	male	4875.57	4067.89	4529.42	0.261292	0.00444759
GRSF1	female	male	1984.71	1656.1	1843.88	0.26113	0.00902162
MISP	female	male	3413.07	2853	3173.04	0.258585	0.00221756
RPL11	female	male	1407.97	1177.9	1309.36	0.257397	0.0245259
PEBP1	female	male	7563.94	6328.75	7034.57	0.257222	0.00356187
CSTF2T	female	male	1125	941.69	1046.44	0.25665	0.0316304
SEC62	female	male	2922.25	2446.61	2718.4	0.256287	0.0179734
TMEM181	female	male	2391.77	2003.07	2225.18	0.255873	0.0204298
MORF4L1	female	male	4106.09	3444.23	3822.43	0.253591	0.0116807
SDAD1	female	male	766.989	643.414	714.028	0.253441	0.0462203
TUBB2B	female	male	3963.8	3328.2	3691.4	0.252128	0.0450991
ETF1	female	male	1645.27	1381.46	1532.21	0.252124	0.0281073
DNMT1	female	male	1133.84	952.309	1056.04	0.251727	0.0199967
EIF4H	female	male	5369.08	4510.92	5001.29	0.251247	0.004132
ARMCX3	female	male	2001.32	1683.7	1865.19	0.249299	0.0113266
CLCN3	female	male	4580.28	3854.57	4269.26	0.248857	0.0493303
ATP6AP2	female	male	3289.53	2768.9	3066.4	0.248577	0.00688685
MAEA	female	male	1054.95	888.112	983.447	0.248397	0.0323439
UBR1	female	male	1640.49	1381.84	1529.64	0.247529	0.0331273
CBX3	female	male	2167.53	1827.14	2021.65	0.246475	0.0320756
NOLC1	female	male	1509.93	1274.76	1409.14	0.244285	0.0467441
GAD1	female	male	4504.09	3805.86	4204.85	0.243009	0.0173158
CAMK2N1	female	male	10805.1	9146.5	10094.2	0.24042	0.0463645
HNRNPK	female	male	7230.5	6125.77	6757.05	0.239205	0.0171378
PLEKHB2	female	male	9001.41	7637.53	8416.89	0.237044	0.00894749
SET	female	male	3670.14	3114.03	3431.81	0.237043	0.00774739
IARS1	female	male	2016.2	1710.74	1885.29	0.236999	0.0463025
WTAP	female	male	1309.42	1111.96	1224.8	0.235816	0.0329367
USP8	female	male	1750.69	1489.15	1638.6	0.233404	0.0191257
EXOC2	female	male	1332.91	1135.92	1248.49	0.230759	0.0443176
MACO1	female	male	1186.79	1011.43	1111.64	0.230674	0.0394683
TRAPPC11	female	male	1115.26	950.555	1044.67	0.230574	0.0480701
RELCH	female	male	1734.91	1479.07	1625.27	0.230164	0.0173476
PJA2	female	male	7831.78	6687.16	7341.23	0.227945	0.0483766
SUN1	female	male	2405.81	2055.66	2255.74	0.22691	0.0263227
HNRNPUL2	female	male	8028.03	6868.39	7531.04	0.225067	0.0271376
RANBP9	female	male	1135.35	972.049	1065.37	0.224049	0.0413774
MPHOSPH8	female	male	2090.44	1790.01	1961.68	0.223869	0.0281073
CDV3	female	male	1879.12	1615.21	1766.02	0.21835	0.0363311
TM9SF2	female	male	2714.59	2335.4	2552.08	0.217064	0.0277094
PPP3CB	female	male	4738.44	4085.93	4458.79	0.213753	0.0189398
LGI1	female	male	2275.87	1976.97	2147.77	0.203124	0.0461742
CLTC	female	male	12455.1	10830.8	11759	0.201591	0.04207
ACIN1	female	male	2366.36	2069.06	2238.94	0.193711	0.0497913
KIAA0513	female	male	8479.51	9576.35	8949.58	-0.175498	0.0492796
REEP5	female	male	8631.88	9817.72	9140.1	-0.185704	0.0376924
CALM1	female	male	46170.5	52534	48897.7	-0.186277	0.0313804
CLSTN1	female	male	24789.4	28282.2	26286.3	-0.190169	0.0117707
KLC1	female	male	7303.51	8335.06	7745.6	-0.190611	0.0448007
DDB1	female	male	3236.24	3697.21	3433.8	-0.192117	0.0276308
AMIGO1	female	male	1868.59	2138.1	1984.09	-0.194386	0.0448847
PPP3CA	female	male	13544	15527.7	14394.2	-0.197186	0.0230676
PDE4A	female	male	2808.44	3226.44	2987.58	-0.200189	0.0492343
FGFR1	female	male	1895.5	2179.67	2017.29	-0.201528	0.045609
MFN2	female	male	2548.37	2935.88	2714.45	-0.204246	0.0317213
WSB2	female	male	4916.51	5675.89	5241.96	-0.207201	0.0421496
SCAMP5	female	male	4820.89	5567.39	5140.82	-0.207709	0.0423885
MLF2	female	male	4017.9	4648.25	4288.05	-0.210258	0.0497857
SMARCA2	female	male	4968.14	5755.11	5305.41	-0.212142	0.0305349
GMEB2	female	male	12436.6	14414.7	13284.4	-0.21296	0.022903
ANKH	female	male	2680.94	3109.07	2864.42	-0.21374	0.018247
MYO3A	female	male	6768.38	7852.58	7233.04	-0.214357	0.00631816
PAK1	female	male	4782.63	5557.71	5114.81	-0.216676	0.0161736
PRKAR1A	female	male	6833.18	7953.75	7313.42	-0.219077	0.029598
SCRN1	female	male	5333.88	6209.2	5709.02	-0.219236	0.0150779
PDHA1	female	male	3715.98	4325.84	3977.35	-0.219247	0.0193066
LETM1	female	male	2155.22	2509.17	2306.91	-0.219373	0.0312375
PAFAH1B2	female	male	3696.88	4304.8	3957.42	-0.219643	0.0140237
FAM120A	female	male	2309.59	2698.59	2476.3	-0.224558	0.0264934
PKM	female	male	15535.7	18152.4	16657.1	-0.224573	0.0334647
KDM3B	female	male	2487.78	2907.95	2667.86	-0.225137	0.0280462
CAPZB	female	male	1730.25	2023.78	1856.05	-0.226098	0.0349503
PDZD4	female	male	1848.31	2162.43	1982.94	-0.226462	0.0456013
SNRPN	female	male	5025.37	5883.21	5393.02	-0.227377	0.0381889
COPB2	female	male	1788.88	2095.61	1920.33	-0.228326	0.0461742
ILRUN	female	male	4618.3	5417	4960.6	-0.230141	0.0288645
LONP1	female	male	1411.11	1656.1	1516.1	-0.230995	0.0497855
DLG4	female	male	6719.26	7887.49	7219.93	-0.23126	0.0160749
PRMT1	female	male	1717.32	2018.66	1846.46	-0.233232	0.0359812
ELOVL5	female	male	1840.19	2163.34	1978.69	-0.233382	0.0312375
AP1G2	female	male	3237.21	3807.57	3481.65	-0.234105	0.0404311
PLPPR2	female	male	3332.94	3920.57	3584.78	-0.234269	0.0169698
ZFAND5	female	male	3265.51	3841.84	3512.51	-0.234489	0.0114809
IL6ST	female	male	2368.45	2786.42	2547.58	-0.234505	0.040793
SYT11	female	male	11881.4	13985.9	12783.3	-0.235274	0.0184239
HMG20A	female	male	2072.24	2441.59	2230.53	-0.23666	0.0306374
SYT7	female	male	3513.06	4139.6	3781.57	-0.236774	0.0281225
SPIRE2	female	male	2615.86	3088.81	2818.55	-0.239783	0.0232923
RETREG3	female	male	1624.66	1918.83	1750.74	-0.240109	0.0380095
ZCCHC12	female	male	1172.36	1384.81	1263.41	-0.240259	0.0410665
SRSF4	female	male	1877.02	2217.66	2023.01	-0.240595	0.0316362
ANKRD17	female	male	2867.22	3387.72	3090.29	-0.240662	0.0170704
EIF4B	female	male	3276.45	3871.46	3531.45	-0.240752	0.0147708
RNPS1	female	male	2594.37	3066.27	2796.61	-0.24111	0.0239967
SMARCC2	female	male	4848.52	5733.12	5227.64	-0.241778	0.0168586
TBC1D9	female	male	3528.83	4176.21	3806.28	-0.243021	0.0419354
UBE2I	female	male	1896.8	2244.83	2045.95	-0.243047	0.00585479
ABR	female	male	9433.61	11176.9	10180.8	-0.244644	0.0274714
KCNQ3	female	male	4741.32	5622.7	5119.06	-0.245959	0.0398711
UBE2O	female	male	3309.6	3926.36	3573.93	-0.246539	0.0160749
SBNO1	female	male	1171.84	1390.31	1265.47	-0.246574	0.0216555
TMEM63B	female	male	1423.2	1688.6	1536.94	-0.246696	0.034711
ANKS1B	female	male	4295.51	5098.23	4639.54	-0.247169	0.0277487
EMC3	female	male	1756.61	2084.87	1897.3	-0.247199	0.0472774
SLC24A3	female	male	3569.19	4236.88	3855.34	-0.247422	0.0312375
GNAO1	female	male	8073.78	9588.16	8722.8	-0.248009	0.00121863
SNPH	female	male	2623.85	3117.53	2835.43	-0.248732	0.0136372
AGPAT3	female	male	5055.82	6007.51	5463.68	-0.248827	0.000966729
CCSER2	female	male	2589.5	3079.6	2799.54	-0.25009	0.0219687
CDC42BPB	female	male	3718.58	4422.96	4020.45	-0.250268	0.0404311
DNM1	female	male	17447.5	20757.8	18866.2	-0.250638	0.0164827
FEM1B	female	male	2546.34	3029.74	2753.51	-0.25076	0.0489992
CANT1	female	male	1917.92	2282.39	2074.12	-0.25101	0.00555429
POLR1D	female	male	985.414	1173.04	1065.82	-0.251455	0.0396818
PLEKHM3	female	male	1266.17	1508.2	1369.9	-0.252288	0.0357043
PPP6R2	female	male	2247.5	2677.21	2431.66	-0.252393	0.00811865
SH3BP5	female	male	1486.7	1771.12	1608.59	-0.252588	0.0261271
PMPCA	female	male	1791.92	2135.37	1939.11	-0.252995	0.016391
SYS1	female	male	1534.19	1828.95	1660.51	-0.253563	0.0304336
MXI1	female	male	1525.09	1818.92	1651.02	-0.254148	0.0466176
FYN	female	male	1685.22	2010.39	1824.58	-0.254543	0.0166275
GPR158	female	male	2460.63	2936.13	2664.41	-0.254888	0.0337643
BAG6	female	male	2981.93	3559.66	3229.53	-0.255518	0.00675394
FKBP8	female	male	7933.56	9479.89	8596.28	-0.256904	0.0394683
DVL1	female	male	2181.6	2607.14	2363.97	-0.25709	0.00631251
ARPC2	female	male	2241.93	2679.33	2429.38	-0.257144	0.0257013
RAB3A	female	male	4625.12	5528.39	5012.24	-0.257375	0.00852465
CYFIP2	female	male	8702.16	10405.8	9432.27	-0.25794	0.0267249
TUSC2	female	male	1093.05	1308.52	1185.39	-0.259591	0.0133449
USP11	female	male	5623.18	6732.52	6098.61	-0.259748	0.00133848
RPN2	female	male	1389.87	1664.99	1507.78	-0.260571	0.0176418
SLBP	female	male	1724.46	2066.75	1871.16	-0.261189	0.0066358
PML	female	male	491.995	590.17	534.07	-0.262479	0.0474491
NOVA1	female	male	2360.2	2834.53	2563.48	-0.264216	0.0217182
FAM13C	female	male	4083.06	4905.08	4435.35	-0.264624	0.00736966
FAM219A	female	male	2808.76	3374.38	3051.17	-0.264676	0.0112812
SEMA6B	female	male	1805.95	2172.6	1963.08	-0.266668	0.00504872
HGSNAT	female	male	3973.89	4784.54	4321.31	-0.267853	0.00908296
FKRP	female	male	1189.19	1431.98	1293.25	-0.268042	0.0401304
BBS1	female	male	665.058	800.954	723.299	-0.268263	0.0362446
BRD4	female	male	2147.8	2587.1	2336.07	-0.268491	0.0236563
GNG7	female	male	3431.58	4133.95	3732.59	-0.26865	0.0244072
APLP1	female	male	9962.34	12002.4	10836.7	-0.268773	0.0107316
DPP6	female	male	6451.68	7780.2	7021.05	-0.27014	0.0293429
TOM1L2	female	male	5353.66	6456.62	5826.36	-0.270274	0.00993559
SLC39A3	female	male	2494.89	3009.02	2715.23	-0.27031	0.00356187
EBAG9	female	male	642.031	774.346	698.738	-0.270358	0.0315039
SPECC1L	female	male	1298.58	1566.74	1413.5	-0.27087	0.0259455
MASP2	female	male	1306.32	1576.58	1422.15	-0.271323	0.0344647
ADCY1	female	male	7327.34	8843.68	7977.2	-0.271352	0.0362062
TCP11L1	female	male	2171.68	2621.75	2364.57	-0.271719	0.0453172
BRSK1	female	male	3991.17	4818.97	4345.94	-0.271925	0.00286413
TALDO1	female	male	1589.13	1918.8	1730.42	-0.271976	0.0310938
ADGRB2	female	male	3872.57	4675.99	4216.89	-0.271981	0.0415982
PPP1R15A	female	male	1303.8	1574.4	1419.77	-0.27204	0.0217182
KCNQ2	female	male	6630.27	8008.18	7220.8	-0.272406	0.0127918
GAS6	female	male	1015.66	1227.35	1106.38	-0.273128	0.0222636
EIF2AK1	female	male	852.41	1030.2	928.608	-0.27326	0.0254107
ANKRD46	female	male	1396.44	1687.68	1521.26	-0.273274	0.0447963
SDF4	female	male	1418.34	1714.54	1545.28	-0.273585	0.0079538
IQSEC1	female	male	6365	7694.17	6934.64	-0.273619	0.00630682
EIF2A	female	male	664.772	803.756	724.337	-0.273902	0.0298519
MIEF1	female	male	706.802	854.937	770.289	-0.274478	0.0274174
DLGAP2	female	male	1033.53	1250.09	1126.34	-0.274506	0.0210734
ARHGAP35	female	male	4050.64	4899.77	4414.55	-0.274563	0.0320482
ZNFX1	female	male	2084.54	2521.51	2271.81	-0.274566	0.0314786
FNDC4	female	male	721.812	873.253	786.715	-0.274825	0.0209341
BCKDK	female	male	1204.97	1457.86	1313.35	-0.274861	0.00665159
NACC2	female	male	4028.84	4875.35	4391.63	-0.275145	0.029532
CFL1	female	male	6604.23	7993.81	7199.76	-0.275493	0.0106918
NRSN1	female	male	7334.7	8881.73	7997.71	-0.276107	0.0236901
SPIN1	female	male	3038.88	3680.3	3313.77	-0.276283	0.0102243
KCTD1	female	male	830.439	1005.69	905.546	-0.27632	0.0395579
HGS	female	male	2601.47	3150.83	2836.91	-0.27643	0.00677422
TMEM47	female	male	3867.91	4686.94	4218.92	-0.277081	0.00297252
PHYHIP	female	male	9140.9	11076.6	9970.48	-0.277101	0.00738913
ZC3H18	female	male	813.852	986.706	887.933	-0.277828	0.019695
DCAF5	female	male	1500.99	1819.94	1637.68	-0.277978	0.0438856
PACS1	female	male	4183.35	5072.53	4564.43	-0.278063	0.0031925
MAST2	female	male	1121.87	1360.28	1224.04	-0.278068	0.0363311
TMEM8B	female	male	1104.23	1339.31	1204.98	-0.278444	0.00523014
PPM1L	female	male	2249.22	2728.39	2454.58	-0.278635	0.019876
KIF5C	female	male	18620.8	22592.5	20323	-0.278927	0.00613057
SGSM1	female	male	2803.97	3403.67	3060.98	-0.279591	0.00655466
TMEM132B	female	male	3321.4	4033.81	3626.72	-0.280368	0.0361299
PPP2R5B	female	male	1810.94	2199.81	1977.6	-0.280647	0.000920923
GPI	female	male	6678.3	8113.94	7293.58	-0.28093	0.0137585
PLPP3	female	male	3651.46	4436.71	3988	-0.281013	0.0446305
UBN1	female	male	1463.94	1779.35	1599.12	-0.281486	0.0199645
RFC5	female	male	965.29	1173.46	1054.5	-0.281726	0.029598
BSDC1	female	male	1647.76	2004.26	1800.54	-0.282566	0.0149252
SLC16A1	female	male	700.663	852.313	765.656	-0.282677	0.0476889
NCDN	female	male	23353.7	28412	25521.6	-0.282848	0.00107858
SPTAN1	female	male	18162.7	22099.6	19849.9	-0.283049	0.00124909
DYNC1H1	female	male	19202.1	23375.6	20990.7	-0.283743	0.00593822
WDR45B	female	male	1790.3	2179.55	1957.12	-0.283817	0.00380786
NCAM1	female	male	8121.17	9886.99	8877.95	-0.283852	0.00223517
CLIC4	female	male	2342.46	2853.11	2561.31	-0.284525	0.0299537
SMG7	female	male	1455.09	1772.34	1591.05	-0.284538	0.0279047
NUAK1	female	male	1545.54	1883.25	1690.27	-0.285099	0.0177964
ZC3H7B	female	male	3933.89	4793.83	4302.44	-0.285231	0.010401
CARS1	female	male	1413.15	1723.25	1546.05	-0.286231	0.0362189
TEAD1	female	male	516.708	630.623	565.529	-0.287462	0.0328102
MAP3K5	female	male	1876.19	2290.75	2053.86	-0.287997	0.039451
MMS19	female	male	957.871	1169.91	1048.74	-0.288457	0.0250076
ADD1	female	male	4560.84	5571.51	4993.99	-0.288779	0.00139962
MAP1A	female	male	35995.4	43998	39425.1	-0.289626	0.00424432
SCMH1	female	male	588.426	719.312	644.52	-0.289707	0.03309
PPP1R13B	female	male	862.443	1054.3	944.668	-0.289747	0.0201567
SSU72	female	male	852.628	1042.58	934.034	-0.290205	0.0454472
PAXIP1	female	male	551.035	673.934	603.706	-0.290402	0.035256
SEPTIN5	female	male	8565.72	10477.4	9385.01	-0.290628	0.00639867
CNNM1	female	male	1057.07	1293.15	1158.24	-0.290802	0.0240694
COPA	female	male	3363.24	4117.07	3686.31	-0.291787	0.0118746
N4BP1	female	male	1611.57	1972.89	1766.42	-0.291842	0.0192994
EHMT2	female	male	2103.52	2575.16	2305.65	-0.29185	0.00197982
SLC22A17	female	male	5765.9	7061.75	6321.26	-0.292487	0.000915448
GATD1	female	male	877.153	1074.62	961.782	-0.293005	0.0469696
CACTIN	female	male	689.789	845.155	756.374	-0.293103	0.0163216
BLM	female	male	1386.89	1699.77	1520.98	-0.293459	0.0446877
RPRD1A	female	male	1629.67	1997.28	1787.22	-0.293485	0.00329331
SMPD3	female	male	1372.69	1682.45	1505.44	-0.29359	0.0441128
B4GALNT1	female	male	943.942	1157.01	1035.26	-0.293626	0.0470322
ERGIC1	female	male	1114.55	1366.54	1222.54	-0.2941	0.0204353
MAN1B1	female	male	1116.81	1369.34	1225.04	-0.294109	0.020135
RAB11FIP2	female	male	2007.91	2462.96	2202.93	-0.294697	0.0212402
DNAJC3	female	male	831.481	1020.08	912.31	-0.294867	0.00766944
NCOR1	female	male	2936.79	3604.1	3222.78	-0.29539	0.022903
VPS39	female	male	1280.12	1571.11	1404.83	-0.295486	0.0113726
SPIRE1	female	male	2328.17	2857.48	2555.02	-0.295551	0.00479692
AHCYL1	female	male	7022.39	8625.47	7709.42	-0.296643	0.0312375
RASGEF1C	female	male	1197.65	1471.22	1314.9	-0.296794	0.0251106
GRID1	female	male	1680.76	2064.67	1845.29	-0.296826	0.0357043
EIF3C	female	male	2784.03	3420.36	3056.74	-0.296992	0.018339
ASH1L	female	male	6794.59	8347.82	7460.26	-0.297016	0.0160749
MARK1	female	male	1194.35	1467.47	1311.4	-0.297126	0.018247
ABCF1	female	male	1546.82	1900.55	1698.42	-0.297157	0.00711771
PNMA5	female	male	620.422	762.755	681.422	-0.297925	0.0457668
MAP3K10	female	male	3127.95	3846.42	3435.86	-0.298299	0.00434016
WASL	female	male	2903.71	3570.68	3189.56	-0.298305	0.0115797
ZNRD2	female	male	1765.04	2170.83	1938.95	-0.298568	0.0325911
PRPF8	female	male	6779.43	8339.76	7448.14	-0.298845	0.0139694
PPP6R1	female	male	1188.4	1462.06	1305.68	-0.299024	0.00504872
RAPGEF2	female	male	3221.17	3963.28	3539.22	-0.299116	0.0186371
CTTNBP2NL	female	male	464.398	571.446	510.276	-0.299233	0.0473314
CALN1	female	male	7729.63	9513.12	8493.98	-0.299523	0.0386282
LSM14A	female	male	1504.26	1851.46	1653.06	-0.299623	0.00542918
REPIN1	female	male	926.168	1139.97	1017.8	-0.299628	0.0235319
HK1	female	male	5928.48	7299.26	6515.96	-0.300091	0.000523577
GAK	female	male	2009.78	2474.51	2208.95	-0.300106	0.000915448
ASB6	female	male	563.559	694.033	619.477	-0.300449	0.0160173
NCOA1	female	male	3276.71	4035.41	3601.87	-0.300458	0.0172873
TNFRSF21	female	male	1134.34	1397.15	1246.97	-0.300647	0.0230713
KEAP1	female	male	1821.08	2243.49	2002.12	-0.300963	0.0105922
SYNGR1	female	male	6996.37	8621.39	7692.81	-0.301313	0.000698859
GBF1	female	male	2206.46	2719.55	2426.36	-0.301642	0.0103591
PCSK2	female	male	2970.92	3662.57	3267.34	-0.30195	0.0437257
ATG2A	female	male	1148.91	1416.49	1263.59	-0.302093	0.0244521
DPP7	female	male	824.483	1017.04	907.009	-0.30281	0.0325844
SKIV2L	female	male	1537.79	1897.06	1691.76	-0.302882	0.00214326
PER1	female	male	11902.5	14683.5	13094.3	-0.302936	1.2833e-05
CSNK1G2	female	male	1936.04	2389.2	2130.25	-0.303431	0.0119881
RWDD1	female	male	703.696	868.401	774.283	-0.303495	0.0200044
PRKCZ	female	male	3584.54	4425.12	3944.79	-0.303928	0.0312027
OSBP2	female	male	1650.41	2038.11	1816.57	-0.304417	0.0142376
PPP2R2B	female	male	1810.79	2236.3	1993.15	-0.304516	0.024335
SETD1A	female	male	806.39	996.354	887.803	-0.305173	0.0239967
SAP130	female	male	809.68	1000.49	891.456	-0.305215	0.0207674
KCTD17	female	male	1642.25	2029.17	1808.07	-0.305234	0.0312027
GOT2	female	male	5029.7	6216.96	5538.53	-0.305755	0.000652216
AKAP6	female	male	3798.34	4695.58	4182.87	-0.305946	0.0231996
TRAPPC10	female	male	1777.31	2197.45	1957.37	-0.306114	0.00709874
SH3BGRL	female	male	731.386	904.292	805.489	-0.306194	0.0107598
FAM110B	female	male	755.813	934.63	832.449	-0.306332	0.0118575
PPFIA1	female	male	1197.99	1481.57	1319.52	-0.306525	0.0147708
AIP	female	male	605.417	748.806	666.87	-0.306686	0.034921
MAN2A2	female	male	3477.72	4301.46	3830.75	-0.306699	0.0115267
APBA1	female	male	4060.83	5023.15	4473.25	-0.306837	0.0100232
B3GAT1	female	male	4121.81	5098.73	4540.49	-0.306867	0.00554054
MCFD2	female	male	1089.84	1348.69	1200.78	-0.307408	0.0141638
AK1	female	male	1432.36	1772.75	1578.25	-0.307593	0.00368107
SLAIN2	female	male	433.899	537.432	478.27	-0.308677	0.0343914
ZNF236	female	male	591.183	732.34	651.679	-0.308843	0.0368561
AGAP1	female	male	3429.8	4249.84	3781.25	-0.309294	0.0182333
GRM7	female	male	782.888	970.347	863.227	-0.309699	0.04632
EPS15	female	male	3920.84	4860.27	4323.45	-0.309885	0.0108949
REEP2	female	male	2561.28	3175.7	2824.6	-0.310215	0.0192585
ZNF592	female	male	805.418	998.67	888.24	-0.310262	0.0361299
EFTUD2	female	male	1401.59	1737.94	1545.74	-0.310297	0.00473833
RNH1	female	male	849.179	1052.99	936.526	-0.310339	0.0129542
DTX1	female	male	1342.77	1665.05	1480.89	-0.310361	0.0112296
TMEM9	female	male	1023.3	1269.1	1128.64	-0.310533	0.0153186
ARIH2	female	male	1337.53	1659.19	1475.38	-0.310901	0.0116132
PCYT2	female	male	973.716	1208.03	1074.14	-0.311131	0.00945714
ATP1A3	female	male	28835	35775.4	31809.4	-0.311149	0.000325255
CSNK1E	female	male	1098.14	1362.58	1211.47	-0.311286	0.0499185
TPM3	female	male	2724.09	3381.42	3005.8	-0.311843	0.0108949
PI4KA	female	male	2952.92	3665.78	3258.43	-0.311974	0.0282877
NOMO1	female	male	2062.72	2561.16	2276.34	-0.31226	0.00849648
SH3GLB1	female	male	1259.81	1564.82	1390.53	-0.31279	0.00665048
CDC34	female	male	811.687	1008.26	895.932	-0.312818	0.00914611
APLP2	female	male	11704.8	14544	12921.6	-0.31333	0.00378704
MIDEAS	female	male	7589.41	9430.58	8378.48	-0.313359	0.00169162
KLF3	female	male	704.101	875.24	777.446	-0.313831	0.0125534
SNAP91	female	male	6721.61	8356	7422.06	-0.313999	0.000263882
DYNLL2	female	male	3386.53	4210.43	3739.63	-0.314181	0.00640731
HS6ST1	female	male	1610.14	2002.49	1778.29	-0.314607	0.00858566
CUL4A	female	male	6240.92	7762.26	6892.93	-0.314719	0.000447433
GSK3B	female	male	3610.87	4491.08	3988.11	-0.314719	0.0118129
OAZ1	female	male	8772.06	10910.4	9688.48	-0.314719	0.00131546
SSH2	female	male	963.5	1198.4	1064.17	-0.31474	0.0313126
GRINA	female	male	3104.75	3863.75	3430.04	-0.315533	0.0144778
KNDC1	female	male	2204.62	2744.12	2435.84	-0.315809	0.0498063
CLSTN3	female	male	8360.24	10406.3	9237.1	-0.315842	0.00131546
RASGRF1	female	male	5577.52	6942.63	6162.57	-0.315861	0.00362555
ZBTB38	female	male	2974.82	3703.2	3286.98	-0.315963	0.0194508
ATP2B2	female	male	9840.26	12252.5	10874.1	-0.31631	0.0109323
IQSEC2	female	male	2815.21	3505.78	3111.17	-0.316492	0.0367814
MBOAT7	female	male	1159.59	1444.26	1281.59	-0.316691	0.00980199
MARCKSL1	female	male	1340.16	1669.33	1481.23	-0.31686	0.0387481
ZBED1	female	male	452.565	563.803	500.238	-0.317096	0.0285913
CUX1	female	male	1994.34	2484.61	2204.46	-0.317124	0.0127918
UBE2Z	female	male	517.949	645.355	572.552	-0.317264	0.0387481
TAF6	female	male	1291.94	1609.97	1428.24	-0.317499	0.00207246
MEGF8	female	male	2073.64	2584.29	2292.49	-0.317595	0.0314912
MARK2	female	male	1333.5	1662.21	1474.38	-0.317885	0.0194322
MTOR	female	male	2435.23	3035.73	2692.58	-0.317992	0.00592587
RASD2	female	male	2326.8	2900.97	2572.87	-0.31818	0.0156817
COMMD7	female	male	794.325	990.394	878.354	-0.318271	0.016474
UBALD1	female	male	1061.73	1324.25	1174.24	-0.318752	0.0116807
CTSA	female	male	1864.94	2326.34	2062.69	-0.318909	0.0115797
CORO2B	female	male	2769.4	3454.66	3063.08	-0.318964	0.000561015
ANKHD1	female	male	1457.67	1818.6	1612.35	-0.319125	0.016738
SIN3B	female	male	1847.76	2305.55	2043.96	-0.319317	0.00198681
SORBS3	female	male	1570.25	1959.43	1737.04	-0.319446	0.0067076
KCNAB2	female	male	5450.59	6801.63	6029.61	-0.319483	0.00382261
AREL1	female	male	1829.22	2283.23	2023.8	-0.319837	0.0054795
SUOX	female	male	4183.08	5221.66	4628.19	-0.319954	0.00168642
JUND	female	male	1997.93	2494.04	2210.55	-0.320013	0.00519837
SAMD4B	female	male	783.691	978.685	867.26	-0.320619	0.0224667
NUP188	female	male	1037.33	1295.68	1148.05	-0.320822	0.0104386
MAP3K13	female	male	703.173	878.371	778.258	-0.320902	0.0277094
VPS52	female	male	1083.65	1354.41	1199.69	-0.321716	0.00361971
ARHGAP39	female	male	995.884	1244.83	1102.58	-0.321831	0.0105665
DNAJC5	female	male	6137.9	7671.88	6795.32	-0.321835	1.92603e-05
FRMD4A	female	male	897.429	1121.92	993.641	-0.322146	0.0308539
AXIN1	female	male	411.329	514.466	455.53	-0.322895	0.0254647
PITPNM2	female	male	3413.11	4269.27	3780.04	-0.322896	0.00133848
DMWD	female	male	1467.96	1836.5	1625.91	-0.323164	0.000547914
G6PD	female	male	873.428	1092.71	967.406	-0.323182	0.0146382
JAK1	female	male	3356.59	4200.59	3718.31	-0.323613	0.000441299
MARK4	female	male	1358.61	1700.34	1505.06	-0.32367	0.0160749
NEBL	female	male	4003.94	5011.61	4435.8	-0.323862	0.0258159
NDRG3	female	male	5203.76	6513.48	5765.07	-0.323875	0.00195709
MTA3	female	male	1072.75	1343.1	1188.62	-0.324297	0.00318783
LMBRD1	female	male	1394.86	1746.57	1545.59	-0.32439	0.0098142
SS18L1	female	male	1314.26	1646.29	1456.55	-0.32497	0.0273257
LPCAT4	female	male	1141.87	1430.78	1265.69	-0.325437	0.0177964
SLITRK1	female	male	1385.65	1736.42	1535.98	-0.325533	0.00353309
EPB41L1	female	male	9428.93	11820.9	10454	-0.326166	0.000495506
GABRA3	female	male	1824.85	2288.01	2023.34	-0.326344	0.00346906
OSBPL2	female	male	1591.08	1995.28	1764.31	-0.326601	0.00592587
NPM1	female	male	491.01	615.857	544.516	-0.326898	0.017987
HMGXB3	female	male	842.043	1056.3	933.866	-0.327089	0.0127328
TOR1AIP1	female	male	1274.1	1598.4	1413.09	-0.327129	0.0113275
HTT	female	male	4618.85	5796.47	5123.54	-0.327644	0.000633007
MBNL2	female	male	3056.08	3835.57	3390.15	-0.327751	0.00261737
PTBP3	female	male	398.98	500.82	442.626	-0.327905	0.0460361
ARSB	female	male	762.704	957.768	846.303	-0.328547	0.00682879
CTNNBIP1	female	male	745.906	936.84	827.735	-0.328814	0.00617796
MBD5	female	male	940.661	1181.66	1043.95	-0.329102	0.0242839
FAM214B	female	male	380.936	478.62	422.801	-0.32949	0.0442014
CFH	female	male	742.141	933.065	823.966	-0.330234	0.0412168
MYH9	female	male	1269.73	1596.27	1409.68	-0.330241	0.00483081
LGI3	female	male	1849.74	2325.8	2053.76	-0.33042	0.040622
SELENOO	female	male	883.674	1111.23	981.199	-0.330603	0.0268786
PATL1	female	male	536.684	675.054	595.986	-0.330879	0.0183445
SNU13	female	male	1367.23	1719.66	1518.27	-0.330896	0.0104658
GOLGA2	female	male	1938.64	2439.07	2153.11	-0.331281	0.00138411
EBF4	female	male	529.347	666.007	587.916	-0.331357	0.0248228
PREX1	female	male	2152.84	2710.02	2391.63	-0.332063	0.00432931
TRIM62	female	male	538.732	678.434	598.605	-0.332691	0.00776869
CRTC1	female	male	3248.14	4090.64	3609.21	-0.332707	0.0368657
NFE2L1	female	male	6576.83	8283.95	7308.45	-0.332931	0.000503152
ZFR	female	male	2392.17	3013.23	2658.34	-0.332992	0.0056002
GRN	female	male	537.304	677.222	597.269	-0.333875	0.0127918
RANBP3	female	male	1052.89	1327.21	1170.46	-0.334076	0.00394318
SIN3A	female	male	1096.48	1382.32	1218.98	-0.33418	0.00434706
RALGDS	female	male	1070.6	1349.9	1190.3	-0.334419	0.00337517
MBNL1	female	male	1969.02	2483.46	2189.49	-0.334883	0.00495153
NCLN	female	male	641.122	808.854	713.007	-0.335283	0.00760375
HTRA1	female	male	4344.01	5482.47	4831.93	-0.335803	0.0260326
OLFM2	female	male	874.872	1104.13	973.124	-0.335806	0.017323
LIMK1	female	male	2153.92	2718.54	2395.9	-0.335881	0.0127638
OGDH	female	male	3970.87	5011.86	4417.01	-0.335904	0.000608124
PENK	female	male	1340.35	1692.1	1491.1	-0.336221	0.0220598
CAMTA1	female	male	7047.56	8900.94	7841.86	-0.336835	0.00117016
CS	female	male	4401.5	5559.23	4897.67	-0.336902	0.00373231
SIRT2	female	male	1282.84	1620.42	1427.52	-0.337017	0.00400575
DHX33	female	male	732.697	926.048	815.562	-0.337754	0.0161503
UBR4	female	male	3829.41	4841.6	4263.2	-0.338367	0.00477771
GPM6A	female	male	14139.3	17877.8	15741.5	-0.338458	0.0104355
RAB3IP	female	male	1176.57	1488.33	1310.18	-0.33912	0.0137574
PIP4K2B	female	male	2756.96	3488.06	3070.29	-0.339337	0.00477406
ADCY5	female	male	2433.27	3080.12	2710.49	-0.340105	0.00226436
AMPD2	female	male	1488.93	1885.13	1658.73	-0.340433	0.00141243
RGS7BP	female	male	2880.66	3647.57	3209.34	-0.340524	0.000820708
SMARCA4	female	male	3362.32	4257.8	3746.09	-0.340661	0.00933896
COX10	female	male	303.422	384.212	338.046	-0.340664	0.0466455
SLC1A2	female	male	32251.2	40843.5	35933.6	-0.340751	0.00532102
NRN1	female	male	898.276	1137.74	1000.9	-0.340974	0.0386299
SEC11C	female	male	1165.56	1476.86	1298.98	-0.341547	0.013974
CAMK2A	female	male	24808.1	31443.3	27651.7	-0.341941	0.011929
SEPHS1	female	male	1322.98	1677.2	1474.79	-0.342283	0.00266133
EPHB1	female	male	909.158	1152.75	1013.56	-0.34246	0.0283614
TMEM121	female	male	422.875	536.261	471.469	-0.342708	0.0192654
WBP1L	female	male	378.075	479.53	421.555	-0.342955	0.0244104
MRTFA	female	male	722.602	916.784	805.823	-0.34342	0.00317211
ABLIM2	female	male	2164.13	2746.21	2413.59	-0.343679	0.018339
TIPRL	female	male	1513.79	1921.26	1688.42	-0.343853	0.00187755
SMG9	female	male	428.952	544.482	478.465	-0.344082	0.0154296
PRMT2	female	male	1354.44	1719.38	1510.84	-0.344216	0.0264301
PPP1CC	female	male	3944.79	5008.54	4400.68	-0.344452	0.000489921
ARHGEF4	female	male	675.694	857.897	753.781	-0.344475	0.0112555
ACHE	female	male	1725.31	2190.87	1924.83	-0.344675	0.00535583
CPNE3	female	male	566.471	719.376	632.002	-0.34477	0.025881
FADS1	female	male	5319.31	6756.76	5935.36	-0.345095	0.000262041
DPYSL2	female	male	11568.8	14700.7	12911	-0.34564	0.000156081
STK11	female	male	1124.2	1428.82	1254.75	-0.345884	0.00208012
SEC14L1	female	male	2365.98	3007.07	2640.73	-0.345959	0.00457305
CYB5R3	female	male	1925.24	2447.22	2148.95	-0.346087	0.0211613
TRMT2A	female	male	504.528	641.289	563.14	-0.346092	0.0165189
DIPK1B	female	male	821.641	1044.51	917.155	-0.346324	0.00787525
ANK2	female	male	17384.7	22102.9	19406.8	-0.34642	0.000356363
PTTG1IP	female	male	1887.48	2400.32	2107.27	-0.346779	0.0289537
RAB1B	female	male	1622.57	2063.74	1811.64	-0.346982	0.000703523
PKIA	female	male	6151.03	7824.39	6868.18	-0.347143	8.40426e-05
COPS3	female	male	1088.93	1385.38	1215.98	-0.347361	0.0105869
STXBP1	female	male	15740.5	20026.7	17577.4	-0.347446	9.94087e-06
S1PR1	female	male	986.051	1254.82	1101.24	-0.347744	0.0142174
MAP6	female	male	1814.66	2310.88	2027.33	-0.348734	0.0343681
CAMTA2	female	male	4904.19	6245.79	5479.16	-0.348866	0.00487229
ZNF575	female	male	740.024	942.517	826.807	-0.348887	0.00989318
HABP4	female	male	1776.95	2263.47	1985.46	-0.349157	0.00629489
RPTOR	female	male	1388.92	1769.39	1551.98	-0.349304	0.000925703
FBXO34	female	male	1358.66	1730.88	1518.18	-0.349343	0.0171026
STX1A	female	male	687.88	876.653	768.783	-0.3498	0.0160931
EDC4	female	male	1180.29	1504.27	1319.14	-0.349901	0.000426437
ABCA3	female	male	3341.5	4258.75	3734.6	-0.349954	0.00122846
RGMB	female	male	2165.34	2759.95	2420.17	-0.350031	0.00692294
FGFR2	female	male	852.512	1086.92	952.971	-0.350532	0.010987
FASTK	female	male	1439.26	1835.09	1608.9	-0.350534	0.000954815
FOXJ2	female	male	808.869	1031.44	904.257	-0.350679	0.0233889
TRAPPC9	female	male	849.09	1082.87	949.281	-0.350851	0.000616911
CHD8	female	male	2704.34	3448.96	3023.46	-0.350887	0.00922766
NPLOC4	female	male	1468.34	1873.69	1642.06	-0.351703	0.00208934
P4HTM	female	male	2741.96	3499.22	3066.5	-0.351799	4.0302e-05
TCEA2	female	male	1650.74	2106.61	1846.12	-0.351821	0.00138476
USP21	female	male	386.638	493.567	432.465	-0.352163	0.0316362
MRPL37	female	male	561.577	716.977	628.177	-0.352516	0.0180293
SUMO3	female	male	1892.77	2416.93	2117.41	-0.352663	0.000386688
RNF31	female	male	762.175	973.437	852.716	-0.352903	0.0230868
SELENOW	female	male	4667.62	5962.11	5222.4	-0.353141	0.0152204
RAPGEF1	female	male	2593.22	3312.47	2901.47	-0.353173	0.00172157
PIM3	female	male	342.686	437.915	383.499	-0.353605	0.0316362
ACO2	female	male	6564.6	8388.91	7346.45	-0.353793	0.000559901
FOXJ3	female	male	1214.42	1552.08	1359.13	-0.353955	0.0071467
EXOC6B	female	male	1751.83	2239.1	1960.66	-0.35404	0.000407223
EML2	female	male	1545.08	1975.06	1729.36	-0.354244	0.0109471
CABIN1	female	male	1950.24	2493.23	2182.95	-0.354386	0.00164433
TNS1	female	male	1544.68	1974.89	1729.06	-0.354488	0.0433768
SPNS2	female	male	735.629	940.736	823.532	-0.354769	0.00609998
C2CD2L	female	male	2128	2721.99	2382.56	-0.35517	0.000105865
PDLIM5	female	male	792.062	1013.16	886.819	-0.355196	0.0121265
DTNBP1	female	male	644.329	824.293	721.456	-0.355417	0.0343614
ADCY2	female	male	1322.39	1691.97	1480.78	-0.355595	0.0172534
BRSK2	female	male	2203.22	2819.19	2467.21	-0.355662	0.000652216
OSTM1	female	male	418.137	535.144	468.283	-0.355937	0.0341781
NR2F6	female	male	705.221	902.623	789.822	-0.356044	0.0109674
SMARCAL1	female	male	323.45	414.285	362.379	-0.357031	0.0378903
NLGN3	female	male	1227.2	1571.81	1374.89	-0.3571	0.00436854
SOBP	female	male	2292.19	2936	2568.11	-0.357108	0.00480503
SLC39A6	female	male	1097.47	1405.91	1229.66	-0.357313	0.00569484
SNRNP200	female	male	6503.67	8331.56	7287.05	-0.357341	0.000413954
LRRC4B	female	male	3027.28	3879.37	3392.46	-0.357817	5.41142e-05
MAPK6	female	male	3120.27	4000.02	3497.3	-0.358319	0.0144778
DGCR2	female	male	3585.22	4595.99	4018.41	-0.358322	0.00534828
FZR1	female	male	1911.39	2450.38	2142.39	-0.358395	4.20302e-05
ARFIP2	female	male	1067.11	1368.11	1196.11	-0.358438	0.00110865
RPUSD1	female	male	718.941	921.753	805.86	-0.358479	0.0331273
RHOT1	female	male	1233.31	1581.44	1382.51	-0.358702	0.000334419
ATP6V0A1	female	male	9430.06	12092.4	10571.1	-0.358762	5.25036e-05
MARCKS	female	male	2905.72	3729.75	3258.87	-0.360173	0.0282979
BCR	female	male	1843.54	2366.39	2067.62	-0.360215	0.00220157
PKP4	female	male	4507.42	5786.15	5055.45	-0.360313	0.00898737
USO1	female	male	1132.79	1454.48	1270.66	-0.36064	0.00684986
FEM1A	female	male	721.069	925.921	808.863	-0.360728	0.00313778
IGSF8	female	male	2568.93	3299.39	2881.98	-0.361015	9.58837e-05
TMEM183A	female	male	565.711	726.795	634.747	-0.361508	0.0201361
VSTM2L	female	male	1807.33	2322.26	2028.01	-0.361617	0.00341709
PINK1	female	male	4620.91	5939.06	5185.83	-0.362068	7.8507e-05
CPLX1	female	male	7400.52	9512.6	8305.7	-0.362222	0.00857345
SUMO2	female	male	1406.82	1808.42	1578.93	-0.362295	0.00015102
UBAC1	female	male	1181.73	1519.18	1326.35	-0.362444	0.0013785
[truncated: 1,107 more rows]

## Sheet: Liver-sex-biased genes
Gene name	sampleA	sampleB	baseMeanA	baseMeanB	baseMean	log2FoldChange	padj
ASCL1	female	male	689.986	20.3437	402.996	5.07722	3.39739e-31
MGARP	female	male	1172.87	123.446	723.115	3.24622	3.78231e-23
MYL6	female	male	201.524	21.6884	124.451	3.21266	7.45765e-17
ATP5ME	female	male	4024.38	485.723	2507.81	3.05042	4.40269e-27
NDUFA3	female	male	2118.11	258.654	1321.2	3.03345	3.04587e-21
HSD17B2	female	male	968.455	118.986	604.396	3.02458	4.70131e-08
RPS28	female	male	1383.95	199.235	876.214	2.79625	3.12455e-22
PFDN4	female	male	121.526	17.597	76.9853	2.79358	0.00011877
HBA	female	male	1402.02	207.998	890.297	2.75303	5.51337e-11
RPL37A	female	male	3688.67	550.618	2343.79	2.74405	7.11574e-26
ATP5MD	female	male	2263.92	345.083	1441.56	2.71337	3.49927e-30
SPON2	female	male	396.019	60.7268	252.322	2.70321	3.43563e-05
HSD17B12-B	female	male	145.307	25.0089	93.7508	2.5412	9.82765e-05
TEFM	female	male	377.373	65.7222	243.809	2.52088	0.000411706
NR1I2	female	male	327.229	57.9619	211.829	2.49474	0.000252951
RPS21	female	male	1186.3	212.472	768.943	2.48112	1.13945e-24
FMC1	female	male	275.34	49.5809	178.586	2.47338	2.90104e-08
ITPRID1	female	male	209.638	39.1221	136.56	2.42085	0.00586252
MRPS14	female	male	289.983	54.9242	189.244	2.3995	2.01844e-07
RPL22L1	female	male	958.702	181.725	625.712	2.39879	1.81552e-17
UQCRQ	female	male	2404.77	457.863	1570.38	2.39297	2.4455e-23
JCHAIN	female	male	371.292	71.4128	242.772	2.37748	0.000185297
GLRX2	female	male	429.496	82.8806	280.946	2.3727	4.24578e-15
TOMM7	female	male	295.49	57.9837	193.701	2.35183	5.99839e-11
PCBD2	female	male	101.904	20.5064	67.0196	2.31602	3.76546e-06
RNF187	female	male	104.24	21.2516	68.6735	2.29947	0.000998675
ABCC11	female	male	1477.99	305.093	975.321	2.27626	0.000381742
NSDHL	female	male	451.425	94.2369	298.344	2.26043	0.000283414
ZNF185	female	male	143.591	29.8363	94.8389	2.26024	1.21071e-06
KLHDC7A	female	male	184.344	38.5443	121.858	2.25701	0.0100236
CEBPZOS	female	male	256.794	54.6491	170.161	2.2333	0.00164411
AFM	female	male	600.799	128.838	398.53	2.22012	3.35524e-05
APOA2	female	male	27999	6059.81	18596.5	2.20802	2.79365e-19
AOX3	female	male	92.2986	20.2693	61.4289	2.18557	0.00490629
NDUFA1	female	male	1062.7	234.173	707.614	2.18213	1.33216e-21
DDX11L8	female	male	491.945	109.019	327.834	2.17396	9.9647e-07
MPHOSPH6	female	male	80.2091	17.9631	53.5322	2.16325	0.000109519
STRIP2	female	male	224.045	50.6189	149.72	2.14476	0.000289855
TMEM238	female	male	544.94	123.784	364.445	2.13966	7.39186e-12
CLC	female	male	80.7947	18.4079	54.0575	2.127	1.22181e-05
RPS29	female	male	2061.38	477.863	1382.73	2.10932	7.65639e-22
LSS	female	male	704.793	164.729	473.337	2.09654	0.000321847
RPS27A	female	male	2388.56	563.088	1606.22	2.08494	1.13945e-24
ATP5MG	female	male	3604.12	854.879	2425.87	2.0758	1.72693e-12
TLE6	female	male	73.9401	17.8139	49.886	2.05347	0.00573474
CLTRN	female	male	115.901	27.9271	78.198	2.05	0.00160155
PRR15L	female	male	140.566	33.9471	94.8721	2.04547	2.15901e-06
RECQL4	female	male	249.678	60.4425	168.577	2.04398	0.000350592
RPS23	female	male	4821.18	1172.15	3257.31	2.04041	9.04254e-21
HBB	female	male	10212.2	2490.83	6903.06	2.0356	3.76546e-06
GOLT1A	female	male	373.558	91.1202	252.513	2.03341	2.08069e-09
CFAP46	female	male	669.015	164.614	452.843	2.02353	0.000829918
TMEM126B	female	male	178.273	43.8435	120.66	2.02215	0.000219942
NDUFS4	female	male	2000.62	495.757	1355.68	2.01255	0.000508652
SEC61G	female	male	663.031	168.068	450.904	1.98004	1.09447e-10
SNRPD2	female	male	405.006	102.934	275.546	1.97572	9.56275e-12
COX16	female	male	325.837	83.151	221.828	1.97049	3.18262e-16
SSR4	female	male	1399.4	358.55	953.323	1.96431	1.72934e-14
EFCAB3	female	male	53.7395	13.8484	36.6433	1.94819	0.0453559
LSM7	female	male	244.153	63.5961	166.772	1.94064	1.1018e-08
HSPB11	female	male	67.7713	17.6859	46.3061	1.92907	0.000785095
SDR42E1	female	male	722.911	190.168	494.592	1.92558	1.06718e-07
CYP1A5	female	male	293.706	77.3602	200.987	1.92482	0.0142448
MRPL33	female	male	151.004	39.8865	103.382	1.92046	2.0505e-10
RPL31	female	male	2431.82	647.272	1667.02	1.90985	4.17478e-12
TMPRSS7	female	male	61.3431	16.4138	42.0877	1.90925	0.034383
BUB1	female	male	186.862	49.8582	128.146	1.90631	7.00928e-06
ZNF213	female	male	837.461	223.829	574.476	1.90417	8.46698e-05
CA11	female	male	325.264	87.0568	223.175	1.90113	0.000785095
MRPL52	female	male	338.944	90.793	232.594	1.90096	3.57086e-07
HPF1	female	male	95.9245	25.6379	65.8017	1.89982	1.69513e-05
RPS27	female	male	2484.25	667.252	1705.54	1.89663	3.2615e-11
NDUFA2	female	male	1291.57	347.757	887.077	1.89275	2.36224e-10
ATOX1	female	male	279.652	75.7196	192.252	1.88531	1.33331e-13
TM4SF4	female	male	974.694	266.335	671.112	1.87127	0.000355102
COX7B	female	male	6370.45	1752.72	4391.42	1.86176	1.05765e-17
EBP	female	male	454.369	125.312	313.344	1.85787	2.82701e-05
IGFBP2	female	male	2691.75	743.651	1856.85	1.85567	0.000507307
LECT2	female	male	1248.55	345.153	861.379	1.85451	0.00752888
GSTO1	female	male	2279.82	631.035	1573.2	1.85288	1.37248e-06
ZDHHC1	female	male	1068.21	295.907	737.226	1.85225	8.66203e-05
CLCN1	female	male	393.287	109.313	271.584	1.84609	0.00314092
GSTM3	female	male	1236.01	345.564	854.393	1.83852	4.33758e-11
SLIRP	female	male	451.432	126.24	312.064	1.8378	1.86965e-05
GREB1L	female	male	171.118	47.7536	118.247	1.83668	0.00324691
NDUFA12	female	male	1975.11	553.365	1365.79	1.83545	4.1807e-05
TRAPPC2	female	male	139.8	39.4742	96.8031	1.82334	1.15869e-07
WDR72	female	male	123.19	34.9361	85.3671	1.82043	0.0113679
COPS9	female	male	937.098	267.723	650.223	1.80805	3.40618e-05
CCND1	female	male	65.3011	18.7105	45.3337	1.80414	0.0378942
PET100	female	male	297.612	85.6583	206.775	1.79736	3.76546e-06
ASIC1	female	male	754.967	218.876	525.214	1.78629	0.00106086
MRPL42	female	male	887.467	258.018	617.703	1.78227	7.34118e-06
CCDC58	female	male	715.811	208.484	498.385	1.77953	0.00766193
PDGFA	female	male	92.5273	27.0505	64.4658	1.77524	0.0477552
HINT1	female	male	2591.26	758.802	1805.92	1.77201	2.39659e-16
LDHB	female	male	160.21	46.9462	111.668	1.77032	0.0468227
COX6C	female	male	3989.41	1169.53	2780.89	1.77026	5.07004e-11
COLCA2	female	male	799.454	234.899	557.502	1.76631	0.00320811
MRPL23	female	male	472.744	139.025	329.721	1.76578	3.66598e-05
METAP1D	female	male	179.301	52.952	125.151	1.76177	0.000392142
RPL39	female	male	2207.76	651.366	1540.73	1.76112	5.46286e-13
SLC25A34	female	male	86.6772	25.5765	60.4912	1.75913	0.00464922
STAT5A	female	male	405.237	119.688	282.859	1.75828	1.92264e-05
MGST2	female	male	2012.75	598.477	1406.63	1.75009	6.38663e-08
NDUFC2	female	male	858.686	256.192	600.475	1.74434	3.33994e-11
NDUFB4	female	male	2076.84	620.448	1452.67	1.74267	6.71172e-07
RAP1GAP	female	male	514.776	154.018	360.165	1.74001	0.000507307
TAMM41	female	male	86.0367	25.6672	60.1641	1.73992	3.44961e-05
NDUFA13	female	male	2827.63	846.816	1978.71	1.73941	3.44961e-05
L3MBTL1	female	male	56.7376	16.9919	39.7037	1.73685	0.0371307
RGS14	female	male	286.402	86.1377	200.575	1.73592	1.45785e-05
PSMA2	female	male	3534.28	1063.4	2475.33	1.73274	9.24565e-05
MAGOHB	female	male	69.5647	20.9185	48.7163	1.72865	0.00173615
PLA2G12B	female	male	2220.67	672.015	1556.96	1.72435	4.73845e-09
RPS8	female	male	2889.57	875.723	2026.49	1.72258	2.40403e-07
CMTM7	female	male	145.929	44.3656	102.402	1.71869	0.000107412
NME7	female	male	381.203	116.047	267.565	1.71642	1.22488e-08
MICOS10	female	male	688.841	209.687	483.489	1.71551	5.33055e-08
MED21	female	male	469.384	144.439	330.122	1.70032	9.32862e-05
MLH3	female	male	500.691	155.133	352.595	1.69005	0.000927389
MALSU1	female	male	280.046	86.855	197.25	1.68847	3.89219e-07
SPACA6	female	male	64.5962	20.0438	45.5023	1.68822	0.00363798
HHIPL2	female	male	563.008	175.733	397.033	1.6803	0.00179072
CCDC159	female	male	95.0948	29.7287	67.0807	1.67652	0.0268568
MAP2K6	female	male	120.377	37.7061	84.9468	1.67079	0.0348015
FBXL2	female	male	63.3631	19.967	44.7648	1.66906	0.0228158
RFESD	female	male	143.04	44.9053	100.983	1.66862	0.00617938
CMC1	female	male	140.795	44.2432	99.4156	1.66734	0.000309449
UQCC2	female	male	850.817	268.291	601.163	1.66508	0.00181577
SNED1	female	male	364.719	114.97	257.684	1.66423	0.00199887
LGALS2	female	male	142.722	45.1283	100.896	1.66193	0.00766193
FMO4	female	male	1259.67	399.113	890.862	1.65815	0.00201772
RPL32	female	male	3103.79	983.713	2195.19	1.65791	7.45765e-17
MAB21L3	female	male	352.377	111.676	249.22	1.65634	0.00103707
CD22	female	male	44.5189	14.0569	31.4638	1.65539	0.0396829
ATP5MC1	female	male	3184.18	1012.24	2253.35	1.65317	2.13523e-09
RBIS	female	male	273.631	87.0925	193.686	1.65159	4.25991e-07
HYPK	female	male	635.704	205.372	451.276	1.63031	1.00286e-05
ATP5MF	female	male	3200.6	1034.45	2272.25	1.62942	3.73682e-10
CDKL1	female	male	75.9406	24.5713	53.9252	1.62644	0.0257641
ADH5	female	male	1837.01	596.643	1305.42	1.62221	0.00116103
SYCP1	female	male	77.3224	25.1351	54.9564	1.61793	0.00770965
SORBS2	female	male	684.435	223.93	487.076	1.61106	0.000852674
IDNK	female	male	67.0192	21.8661	47.6679	1.61029	0.0174237
MRPL21	female	male	334.428	109.572	238.061	1.60961	0.000453417
HINT2	female	male	2136.97	701.572	1521.8	1.60698	3.54293e-10
DMAC1	female	male	127.657	41.9688	90.9332	1.60505	3.76546e-06
LYPLAL1	female	male	292.275	96.21	208.247	1.60227	0.00208063
COX6B1	female	male	3567.2	1176.55	2542.64	1.60004	1.81682e-10
RPL38	female	male	1298.36	428.581	925.6	1.59928	8.97537e-07
PRSS36	female	male	107.349	35.6404	76.6166	1.58698	0.00245343
ESPL1	female	male	80.1204	26.672	57.2139	1.58682	0.00438939
PDSS1	female	male	41.5016	13.7191	29.5948	1.58591	0.0316192
CISD1	female	male	940.41	314.141	672.009	1.58128	1.61936e-07
ERICH3	female	male	146.344	49.2949	104.751	1.57274	0.00786795
ZSWIM7	female	male	166.302	55.954	119.01	1.57182	1.11177e-06
GIMD1	female	male	92.4609	31.1984	66.2056	1.56532	0.0486808
B3GALNT1	female	male	44.2533	15.0549	31.7397	1.56282	0.0143497
SEC61B	female	male	700.127	237.371	501.803	1.56106	5.61126e-08
ACVR1C	female	male	684.255	232.819	490.782	1.55493	0.0287576
CCDC152	female	male	4130.85	1406.86	2963.42	1.55388	0.00181108
PSMB7	female	male	2442.24	834.192	1753.08	1.5497	0.000401865
RAMP1	female	male	145.337	49.6461	104.327	1.54853	0.0389178
MRPL36	female	male	309.282	105.894	222.115	1.54673	5.51894e-08
SH3TC2	female	male	63.6334	21.9561	45.7717	1.53749	0.0406527
VWA7	female	male	53.1563	18.3422	38.236	1.53153	0.0316714
HLA-DMA	female	male	919.261	318.128	661.633	1.53009	0.000194451
COX7A2P2	female	male	2012.67	698.144	1449.3	1.52753	5.31063e-15
UBC	female	male	1810.43	628.028	1303.68	1.52691	8.43691e-08
TBCA	female	male	302.173	105.065	217.698	1.5249	2.8855e-05
TRAPPC2L	female	male	214.029	74.5633	154.258	1.52226	1.59954e-05
BOLA3	female	male	447.644	156.055	322.677	1.51943	1.51639e-05
ZNF256	female	male	93.2241	32.5785	67.2331	1.51592	0.00471561
GBA3	female	male	352.97	123.28	254.532	1.51581	0.0242527
ATP5F1E	female	male	4372.33	1542.57	3159.57	1.50319	3.70943e-15
RPL37	female	male	2824.99	999.655	2042.7	1.49895	3.54293e-10
DPCD	female	male	129.751	45.9476	93.8354	1.49803	0.000241528
RPAIN	female	male	44.5998	15.8001	32.2571	1.49717	0.0184694
PER3	female	male	279.062	98.876	201.839	1.49603	0.000887586
EXOSC5	female	male	204.975	72.689	148.281	1.49575	0.00157843
NUDT2	female	male	247.5	87.9594	179.126	1.49307	0.000103192
TBC1D7	female	male	243.542	86.509	176.242	1.49266	0.000441638
COL26A1	female	male	89.9243	31.8988	65.0563	1.49228	0.0464794
RPL34	female	male	1110.1	395.88	804.005	1.48792	3.48512e-09
RBP1	female	male	1081.48	385.839	783.347	1.48712	0.000798003
RFXAP	female	male	62.5904	22.3395	45.34	1.48569	0.00167366
TRAPPC6A	female	male	122.495	43.6797	88.7169	1.48512	0.000913519
CCDC167	female	male	65.0373	23.3934	47.1899	1.47571	0.00438349
ERG28	female	male	134.886	48.4974	97.8625	1.4748	0.0138975
BRAWNIN	female	male	110.06	39.6947	79.9035	1.47314	0.00108647
C9ORF16	female	male	514.7	185.469	373.601	1.47217	0.000978919
FAM193B	female	male	512.459	186.37	372.707	1.4592	0.00193874
ATG16L2	female	male	112.329	40.7875	81.6684	1.45905	0.00545125
KLHL17	female	male	194.729	70.937	141.675	1.45435	0.0217648
SARM1	female	male	155.139	56.5596	112.891	1.45379	0.000124503
PHPT1	female	male	446.1	163.066	324.8	1.45157	4.78268e-05
POP5	female	male	101.194	37.0665	73.7106	1.44962	0.00523523
RPL29	female	male	3011.27	1103.01	2193.44	1.44889	9.35512e-12
DBI	female	male	5554.89	2035.05	4046.39	1.44865	6.92773e-10
CDK1	female	male	38.2124	13.9168	27.8	1.44839	0.0356557
NDUFB5	female	male	1605.43	588.381	1169.55	1.44821	7.13363e-06
TMEM60	female	male	59.9628	22.064	43.7205	1.44702	0.00286342
TXN	female	male	2396.31	880.306	1746.59	1.44476	2.19875e-07
ADA2	female	male	152.065	55.9301	110.865	1.44052	0.00779418
TXNDC17	female	male	2351.68	867.038	1715.4	1.43977	2.28754e-06
TRA2A	female	male	365.844	134.832	266.839	1.43939	0.00108131
RFC3	female	male	64.7872	23.8875	47.2587	1.4377	0.00331852
CSKMT	female	male	76.1795	28.1775	55.6072	1.43728	0.00314092
TMEM147	female	male	631.063	233.465	460.664	1.43394	4.8234e-05
CYP51A1	female	male	1769.9	657.227	1293.04	1.42927	0.0134001
GHDC	female	male	132.041	48.9931	96.4493	1.42815	0.00335165
POLE4	female	male	258.016	96.3451	188.728	1.42288	0.00133189
TCEAL2	female	male	523.283	195.228	382.688	1.42139	0.0129886
LSM3	female	male	281.905	105.347	206.237	1.41975	0.000179341
ATP5MC3	female	male	6112.63	2285.52	4472.44	1.41917	8.89025e-10
ESD	female	male	1039.17	388.752	760.42	1.41819	0.00209842
TMEM167A	female	male	1171.54	439.016	857.603	1.41611	3.01197e-05
VAMP5	female	male	1431.92	536.916	1048.35	1.41535	2.70612e-11
ZPBP	female	male	52.3366	19.6462	38.3264	1.41206	0.0267477
RPL23	female	male	4526.5	1712.97	3320.7	1.40193	2.09225e-12
RPL27	female	male	2278.23	862.488	1671.48	1.40134	3.5307e-12
ECE2	female	male	140.563	53.2374	103.137	1.39859	9.18918e-05
PFDN5	female	male	1702.76	646.79	1250.2	1.39666	0.00117046
NDUFB11	female	male	1427.76	543.546	1048.81	1.39326	2.42104e-06
SLC25A26	female	male	237.225	90.7666	174.457	1.38639	0.000794282
MRPL18	female	male	406.823	155.867	299.271	1.38455	0.00865722
SLC44A4	female	male	328.787	126.12	241.929	1.38391	0.00428351
CIRBP	female	male	371.871	142.36	273.509	1.38318	0.00807941
RPL23A	female	male	5864.21	2252.15	4316.18	1.38072	1.74609e-05
MRPL54	female	male	942.291	362.554	693.832	1.37789	1.08495e-05
FLACC1	female	male	44.3898	17.0872	32.6887	1.37634	0.0272527
COX14	female	male	340.863	131.331	251.063	1.37613	0.00104143
METTL6	female	male	448.697	173.021	330.55	1.37349	0.0117417
EXOSC8	female	male	239.947	92.632	176.812	1.3731	0.00794204
ARHGAP25	female	male	195.771	75.6977	144.311	1.37275	0.000309369
RPS24	female	male	6071.67	2355.51	4479.03	1.36605	6.43006e-07
TMEM18	female	male	365.53	141.944	269.707	1.36439	3.23753e-05
NDUFAF5	female	male	66.2457	25.8161	48.9187	1.3609	0.013307
SLC22A13	female	male	73.4945	28.531	54.2244	1.36012	0.0352291
CEP20	female	male	201.492	78.4041	148.74	1.36004	0.0226056
PEMT	female	male	1981.07	771.974	1462.89	1.35972	0.00235075
APBB3	female	male	558.207	217.567	412.218	1.35915	8.97537e-07
RBM45	female	male	123.28	48.0696	91.0467	1.35859	0.00766193
RPS12	female	male	3215.05	1254.78	2374.93	1.35748	1.73961e-05
MFSD4A	female	male	95.7104	37.4481	70.7408	1.35631	0.0186823
FDX2	female	male	165.483	64.6704	122.277	1.35563	0.00769936
RASSF2	female	male	415.674	162.351	307.107	1.35492	0.000116931
IMMP1L	female	male	80.2872	31.5625	59.4052	1.3525	0.0114254
OTUD6B	female	male	78.926	30.8403	58.3178	1.35217	0.0104325
DACT2	female	male	79.1516	30.9596	58.4979	1.35178	0.02331
IFTAP	female	male	345.294	135.682	255.46	1.34813	0.000219942
HNMT	female	male	1994.72	784.051	1475.86	1.34709	0.0106576
PBDC1	female	male	212.064	83.6072	157.011	1.34453	0.00323452
PPCDC	female	male	306.67	120.849	227.032	1.34332	0.00645409
BEX4	female	male	185.625	73.1881	137.438	1.34282	0.00706092
SLC22A5	female	male	858.704	338.954	635.954	1.34084	0.00463121
DYNLT2	female	male	46.4831	18.402	34.4483	1.34029	0.0191921
MGMT	female	male	69.8809	27.6482	51.7812	1.33981	0.0403637
COL5A2	female	male	259.798	102.644	192.446	1.33863	0.0382259
DZIP3	female	male	53.7966	21.2516	39.8488	1.33471	0.0180381
MRPL43	female	male	571.169	227.307	423.8	1.32978	0.000381742
TMEM218	female	male	78.1681	31.0401	57.9704	1.32878	0.0432361
ATP5PO	female	male	4888.9	1949.68	3629.23	1.32623	0.000961814
SMIM20	female	male	164.434	65.5883	122.072	1.32544	0.00471727
PRDX4	female	male	1857.56	742.804	1379.81	1.32251	0.000546533
C1ORF53	female	male	91.7158	36.838	68.1967	1.31703	0.0032334
NUDT7	female	male	663.376	267.647	493.778	1.30913	0.0112338
RPP30	female	male	49.9817	20.0645	37.16	1.30787	0.0311525
NUDT5	female	male	90.151	36.5594	67.1832	1.3072	0.0242527
NDUFB8	female	male	2125.69	859.415	1583	1.30635	3.04151e-07
DIPK1A	female	male	320.959	130.031	239.133	1.30398	0.00968434
SELENOF	female	male	2558.32	1038.13	1906.81	1.30123	4.87875e-06
HEMK1	female	male	234.395	95.2441	174.759	1.29978	0.01862
GNG5	female	male	721.376	294.125	538.268	1.29487	0.00014085
OCC1	female	male	47.7065	19.4754	35.6074	1.29383	0.0288362
MRPL13	female	male	227.383	92.7051	169.664	1.29282	1.64713e-05
ZSCAN4	female	male	87.101	35.583	65.0219	1.28707	0.00207963
GAS8	female	male	96.2792	39.4017	71.9031	1.28696	0.0348446
RMDN1	female	male	219.615	90.0279	164.078	1.28421	4.42361e-05
ATP5PD	female	male	3425.13	1409.38	2561.24	1.281	4.66377e-06
EFCAB11	female	male	92.901	38.564	69.6137	1.26988	0.0316798
STOML1	female	male	130.322	54.0335	97.627	1.26894	0.0226386
CEBPA	female	male	1978.83	821.534	1482.85	1.26816	0.00104785
NAT1	female	male	79.5388	32.9771	59.5838	1.26684	0.0341776
TSPAN15	female	male	161.386	66.9788	120.926	1.26668	0.0303351
MCEE	female	male	193.162	80.3444	144.812	1.26608	0.0355507
C12ORF76	female	male	191.452	79.5545	143.496	1.26585	0.000970964
PIN4	female	male	143.895	59.8854	107.891	1.26214	0.00182852
CLCN2	female	male	1492.34	622.284	1119.46	1.26213	9.24565e-05
BTF3	female	male	1479.62	617.718	1110.23	1.26033	3.36518e-09
FAM92A	female	male	229.29	95.9737	172.154	1.25519	0.0421192
C20ORF27	female	male	76.1773	31.9185	57.2093	1.2539	0.0403934
POLR2G	female	male	96.7783	40.6529	72.7246	1.25214	0.0032958
POLE	female	male	84.6529	35.6268	63.6417	1.24593	0.0327785
GABARAPL2	female	male	864.3	364.56	650.126	1.24584	4.41923e-07
NR1H4	female	male	1281.23	542.25	964.524	1.24078	5.33633e-06
EDA	female	male	66.6864	28.2605	50.2181	1.24029	0.0255911
ULK3	female	male	347.304	147.168	261.532	1.23832	0.000441621
MGAT4D	female	male	61.3029	26.1196	46.2244	1.23393	0.0165857
OXSM	female	male	200.158	85.0274	150.816	1.23381	0.0242527
DEPDC7	female	male	590.914	251.299	445.365	1.23254	0.0064895
HSD17B8	female	male	376.695	160.377	283.987	1.23209	0.000120194
ZNF283	female	male	77.9306	33.2219	58.7697	1.23114	0.00934391
HDHD3	female	male	439.436	187.329	331.39	1.22873	0.0205481
IL18	female	male	81.2621	34.7937	61.3471	1.22772	0.0111162
CKS2	female	male	303.902	129.758	229.269	1.22753	0.0202882
TMEM126A	female	male	467.444	200.044	352.844	1.22421	0.015552
COMMD6	female	male	359.759	154.575	271.823	1.22027	0.00733526
C6ORF163	female	male	100.43	43.0419	75.8351	1.21918	0.0110275
MRPL27	female	male	288.847	124.248	218.304	1.21731	0.0207658
DERL2	female	male	1021.18	439.327	771.813	1.21711	0.000301177
PFDN1	female	male	636.4	274.111	481.133	1.21547	0.0054635
CARD9	female	male	108.827	46.8769	82.2768	1.21529	0.0077711
STRA6L	female	male	498.41	214.587	376.771	1.21456	0.00645409
TMEM25	female	male	11880.1	5122.33	8983.92	1.21369	0.000118767
CCDC12	female	male	264.56	114.255	200.144	1.21319	0.00770474
KYAT3	female	male	1775.77	765.853	1342.95	1.21315	0.00118979
NTAN1	female	male	1057.72	456.969	800.258	1.21095	0.000175668
RPL7	female	male	3990.65	1724.35	3019.38	1.21067	6.85253e-08
GARNL3	female	male	1292.46	559.523	978.345	1.20798	0.0128478
LYRM2	female	male	256.097	110.82	193.835	1.20789	0.00150576
ZNF565	female	male	92.0248	39.9784	69.7192	1.20474	0.00432961
RPL9	female	male	5380.69	2337.01	4076.26	1.20323	2.02083e-08
CCDC107	female	male	251.936	109.331	190.819	1.20273	0.00182825
CFHR5	female	male	98.3361	42.6113	74.454	1.20061	0.0287576
ZNF181	female	male	100.128	43.547	75.8791	1.2004	0.00168392
TRIM38	female	male	301.718	131.484	228.76	1.19976	0.00907778
RMI2	female	male	47.784	20.7085	36.1803	1.19919	0.035242
KRTCAP2	female	male	624.61	272.311	473.625	1.19828	6.81037e-05
SNRPA1	female	male	226.927	98.83	172.028	1.19817	0.00164411
UQCR10	female	male	2840.21	1242.05	2155.28	1.19325	8.27493e-08
TRIM68	female	male	155.765	68.1898	118.233	1.19314	0.00254813
TIMM10B	female	male	63.9371	27.8614	48.4761	1.19226	0.0386356
COX20	female	male	360.085	157.455	273.243	1.1922	0.00139311
ATPSCKMT	female	male	79.6184	34.9303	60.4664	1.19034	0.0283539
RPS17	female	male	3397.1	1488.9	2579.3	1.19022	4.77948e-06
BDH2	female	male	865.808	379.423	657.357	1.19006	0.00454342
FTCDNL1	female	male	286.527	125.543	217.534	1.18922	0.0155473
RGS8	female	male	990.157	434.716	752.111	1.18759	0.0313549
PFN3	female	male	241.58	106.319	183.611	1.1832	0.0307876
PPP1R35	female	male	137.872	60.6829	104.791	1.18188	0.000297591
NDUFB1	female	male	1158	511.218	880.805	1.1797	0.00333269
RAB17	female	male	1544.89	682.377	1175.24	1.17918	1.52765e-05
SRI	female	male	197.133	86.9824	149.925	1.17911	0.000240483
IQUB	female	male	2291.35	1013.21	1743.58	1.17724	0.001906
CCDC102A	female	male	65.2453	28.9779	49.7021	1.1762	0.0294804
MAIP1	female	male	345.198	152.688	262.694	1.17593	9.18918e-05
UQCRH	female	male	3705.12	1644.11	2821.83	1.17216	2.73031e-07
JRKL	female	male	47.1529	20.8599	35.8845	1.17185	0.0246473
PDCD5	female	male	119.247	52.9336	90.8269	1.17077	0.00151145
MICOS13	female	male	725.33	322.058	552.499	1.17074	0.000105002
SCML1	female	male	403.307	179.312	307.309	1.16943	0.0157198
PFDN6	female	male	213.857	95.1391	162.978	1.16907	0.000303853
RPL35A	female	male	1978.79	881.582	1508.56	1.16656	5.57888e-08
MED30	female	male	149.575	66.5722	114.002	1.16512	0.0066308
BORCS7	female	male	399.091	177.99	304.333	1.16447	9.24565e-05
POLR2F	female	male	323.917	144.712	247.115	1.16389	0.000525487
UQCC3	female	male	659.728	294.486	503.196	1.16387	0.00189095
POLR3GL	female	male	59.093	26.3698	45.0688	1.16196	0.0491342
VKORC1	female	male	2094.34	936.85	1598.27	1.16079	0.000729743
TIMM17A	female	male	126.738	56.7834	96.7574	1.15822	0.0141458
SSBP1	female	male	188.731	84.7064	144.149	1.1563	0.00104143
TMEM14C	female	male	730.267	327.837	557.797	1.15562	4.77948e-06
MYNN	female	male	309.079	138.781	236.094	1.15558	0.0183293
MMAB	female	male	291.008	130.568	222.248	1.15554	0.020023
DBNDD1	female	male	76.8583	34.6206	58.7565	1.15519	0.0106367
RPL24	female	male	5605.16	2519.12	4282.57	1.15393	2.32517e-06
SELENBP1	female	male	1096.04	492.641	837.439	1.15377	0.0161396
RHOBTB3	female	male	252.892	113.694	193.236	1.1527	8.12883e-05
RTN4IP1	female	male	132.595	59.5736	101.3	1.15135	0.0228334
NTPCR	female	male	229.183	103.175	175.18	1.15076	0.000663968
MAP1LC3B	female	male	1673.61	756.628	1280.62	1.14552	5.98535e-05
COX17	female	male	1332.7	602.76	1019.87	1.14504	0.00260245
ERI3	female	male	154.382	69.8853	118.169	1.14478	0.00209842
CDK7	female	male	1477.82	668.686	1131.05	1.1442	1.41256e-05
ENY2	female	male	633.35	286.717	484.793	1.14323	3.26756e-08
ANAPC11	female	male	317.742	143.96	243.264	1.14258	0.00300626
TATDN1	female	male	211.428	95.8409	161.891	1.14167	0.00295492
MRPL11	female	male	983.663	445.916	753.2	1.14146	0.00852091
MRPL19	female	male	278.789	126.48	213.514	1.14037	0.00508743
ABHD10	female	male	72.6753	32.9542	55.652	1.13817	0.0220477
CD19	female	male	157.323	71.5009	120.542	1.13794	0.00663935
VPS25	female	male	453.454	206.389	347.569	1.13669	0.000892096
THYN1	female	male	96.3296	43.9387	73.8764	1.1358	0.0488901
TTR	female	male	20418	9298.55	15652.5	1.13473	0.030973
TMEM199	female	male	301.891	137.598	231.48	1.13459	0.000440511
HMGN5	female	male	235.052	106.892	180.126	1.1343	0.000978919
NDUFAF6	female	male	255.056	116.142	195.521	1.13394	0.00923696
ATP5MPL	female	male	1465.11	668.732	1123.81	1.13141	5.86658e-05
ILKAP	female	male	300.626	137.274	230.618	1.13113	0.00442634
GOLT1B	female	male	189.807	86.7455	145.638	1.13068	0.000834065
FKBP3	female	male	172.228	78.6041	132.104	1.13059	0.00177932
ABCC10	female	male	69.3247	31.665	53.1848	1.12757	0.0244028
NADSYN1	female	male	461.711	211.173	354.337	1.12727	4.59042e-05
C7ORF50	female	male	146.542	67.0237	112.463	1.12663	0.0145213
COX15	female	male	181.609	83.0229	139.358	1.12644	0.022442
HSPB2	female	male	133.096	61.0466	102.218	1.12544	0.00157018
YPEL5	female	male	537.001	246.284	412.408	1.12375	0.00252741
ZNF554	female	male	51.5127	23.6044	39.552	1.12309	0.0300285
ARMCX5	female	male	297.993	136.707	228.87	1.12272	0.00267247
FAAP20	female	male	380.031	174.777	292.065	1.12109	0.0201631
USE1	female	male	187.544	86.3334	144.168	1.11987	0.00950915
FIGNL1	female	male	389.217	179.119	299.175	1.11956	0.00700666
DNASE2	female	male	460.82	212.255	354.292	1.11842	0.00396361
SPR	female	male	1017.42	468.776	782.289	1.11795	0.014421
POLR1H	female	male	163.456	75.4131	125.724	1.11728	0.00722995
NTMT1	female	male	212.934	98.474	163.88	1.11343	0.000978919
SMCO4	female	male	105.811	49.0268	81.4749	1.11318	0.0459933
NDUFA7	female	male	738.317	341.26	568.15	1.11294	0.000806341
MRPL50	female	male	512.784	237.289	394.714	1.11253	0.00314092
OGT	female	male	2283.06	1056.04	1757.19	1.11234	0.000916313
COX7A1	female	male	1775.9	822.816	1367.43	1.10993	0.000791024
CETN3	female	male	148.203	68.684	114.123	1.10834	0.00645409
TMED8	female	male	3309.42	1535.18	2549.03	1.10809	2.73031e-07
TUBGCP5	female	male	137.801	63.8191	106.094	1.10659	0.0330992
NOXA1	female	male	217.487	100.922	167.53	1.10569	0.00573474
ITPA	female	male	116.426	54.0778	89.7054	1.10559	0.00477732
UNC50	female	male	222.823	103.827	171.825	1.10321	0.000219123
SHBG	female	male	1901.87	886.211	1466.59	1.10196	0.000978919
SAP30	female	male	67.0125	31.2834	51.7	1.10044	0.0228334
MED11	female	male	146.454	68.4122	113.008	1.0986	0.0023171
SMDT1	female	male	390.181	182.485	301.168	1.09704	2.75301e-05
NDUFA8	female	male	916.283	428.639	707.292	1.09568	0.00109208
RPL27A	female	male	3561.64	1666.73	2749.53	1.09558	3.66598e-05
CUTA	female	male	322.343	150.96	248.893	1.09465	0.0120698
ATP23	female	male	116.553	54.601	90.0019	1.09184	0.0360574
FGFR4	female	male	590.734	277.518	456.499	1.08969	0.00428351
RPS20	female	male	4768.56	2240.92	3685.29	1.08953	6.59357e-06
ANAPC13	female	male	453.003	212.822	350.068	1.08919	0.000499273
MRPL14	female	male	247.406	116.273	191.206	1.08915	0.00175053
TMEM19	female	male	859.634	404.401	664.534	1.0882	2.02009e-06
PRKN	female	male	128.496	60.5675	99.3837	1.08471	0.00641427
TMEM160	female	male	213.88	101.015	165.509	1.08293	0.00157843
JAML	female	male	1844.33	870.97	1427.17	1.08261	0.00235248
MRPS33	female	male	321.779	152.034	249.031	1.08102	0.0141127
NAE1	female	male	108.616	51.1839	84.0021	1.08052	0.0360574
FBP1	female	male	8414.08	3981.38	6514.35	1.07948	0.00128108
MRPS6	female	male	103.727	49.2317	80.372	1.07726	0.0211121
FIGNL2	female	male	219.851	104.123	170.253	1.07692	0.0164095
NDUFA9	female	male	2862.52	1357.82	2217.65	1.07585	9.4268e-05
JRK	female	male	72.3401	34.368	56.0664	1.07502	0.0100706
SMIM30	female	male	593.537	282.02	460.029	1.07443	0.000482032
FBXO10	female	male	400.941	190.546	310.772	1.07283	0.000123038
SRSF6	female	male	1406.86	669.005	1090.63	1.07246	0.0386122
MRPL47	female	male	153.86	73.264	119.319	1.07026	0.0406204
C21ORF58	female	male	50.3481	23.9606	39.0391	1.07022	0.0360228
SMIM4	female	male	240.482	114.482	186.482	1.07018	0.00442634
HES4	female	male	187.983	89.614	145.825	1.06987	0.00451162
PPIA	female	male	5817.43	2772.25	4512.35	1.06938	0.000225299
SAT2	female	male	668.008	318.35	518.154	1.06894	0.0466666
NAGK	female	male	257.137	122.663	199.505	1.06893	0.0192306
LEAP2	female	male	3018.08	1439.7	2341.63	1.06795	0.0241334
MAP3K7CL	female	male	85.6134	40.8183	66.4155	1.06721	0.0404648
WDR41	female	male	172.62	82.409	133.958	1.06574	0.0129341
PPP1R3B	female	male	5473.96	2616.43	4249.3	1.06488	0.00236613
URAH	female	male	3056.39	1461.36	2372.81	1.06449	0.00067484
AKIP1	female	male	221.292	106.052	171.904	1.062	0.00298965
GALK1	female	male	943.462	451.787	732.744	1.06175	0.00309897
CKAP2L	female	male	109.402	52.3716	84.9605	1.06131	0.0216841
NDUFS5	female	male	1283.12	615.212	996.873	1.06052	2.24797e-05
ZNF772	female	male	59.8965	28.6861	46.5206	1.05988	0.0463145
FAM207A	female	male	225.809	108.543	175.552	1.0587	0.0157563
SDR39U1	female	male	473.304	227.438	367.933	1.05723	0.00333051
ATP5IF1	female	male	1334.88	641.614	1037.76	1.05649	0.0223629
RNASEH2C	female	male	170.098	81.8649	132.284	1.05627	0.0190028
PEX11B	female	male	1328.64	639.609	1033.34	1.0547	0.0113505
MYL6B	female	male	2003.08	965.642	1558.47	1.05279	1.22181e-05
COPS4	female	male	252.094	121.721	196.22	1.05183	0.0054635
MGST3	female	male	201.815	97.2962	157.021	1.0501	0.0285884
ZFP57	female	male	288.547	139.83	224.811	1.04606	0.0165971
GLT1D1	female	male	3644.05	1768.67	2840.32	1.04292	0.000162671
ATP6V1F	female	male	587.885	285.452	458.271	1.04291	0.000391421
CNIH1	female	male	941.898	457.375	734.245	1.04206	0.024413
TRAPPC4	female	male	534.299	260.262	416.855	1.03842	0.00128556
SEC31B	female	male	152.372	74.0915	118.823	1.03805	0.0137919
ZNF333	female	male	44.8104	21.8102	34.9532	1.03669	0.0431636
IL33	female	male	1007.96	491.456	786.603	1.03635	0.0338492
FGF1	female	male	349.41	170.467	272.72	1.03412	0.0349069
GTF2H5	female	male	213.671	104.422	166.85	1.03299	0.000371992
QRSL1	female	male	215.654	105.413	168.408	1.03209	0.00843924
FXYD1	female	male	1699.24	831.048	1327.16	1.0318	0.00141907
RPL18	female	male	1737.67	851.747	1357.99	1.02867	5.04778e-05
RPS13	female	male	1820.38	892.802	1422.85	1.02809	0.00387274
COMMD3	female	male	241.144	118.322	188.506	1.02669	0.0292167
CLMP	female	male	100.279	49.1679	78.3745	1.02511	0.00882209
USP20	female	male	234.427	115.272	183.361	1.02486	0.0287809
RPS19	female	male	2043.58	1004.77	1598.37	1.02435	0.00143929
NEIL1	female	male	1178.45	579.429	921.727	1.02428	0.000806341
OSBPL7	female	male	236.955	116.495	185.33	1.02396	0.0356557
C1D	female	male	86.4826	42.4077	67.5934	1.02371	0.0211321
APOC4	female	male	32466.5	16000.5	25409.7	1.02084	0.000225299
NDUFB10	female	male	1445.64	713.555	1131.89	1.01852	0.0019853
BCAS2	female	male	231.323	114.469	181.243	1.01401	0.00263254
MT-CO3	female	male	4871.92	2413.09	3818.14	1.0135	0.00933098
SRRD	female	male	83.6514	41.4564	65.5678	1.012	0.0240686
COX5A	female	male	2819.01	1398.24	2210.11	1.01143	0.00139068
PAAF1	female	male	211.775	105.474	166.218	1.00775	0.0332275
RPL11	female	male	3350.09	1666.55	2628.57	1.00747	0.000508652
MIEF2	female	male	608.927	303.299	477.943	1.00526	0.0499273
PGGHG	female	male	654.166	326.124	513.577	1.0035	0.0269134
COPG2	female	male	154.963	77.2539	121.659	1.00261	0.0233179
KLHL23	female	male	1671.01	835.231	1312.82	1.00067	3.76546e-06
MFSD9	female	male	326.184	163.1	256.291	0.998531	0.0334442
PTRHD1	female	male	109.373	54.8813	86.0194	0.998124	0.0377363
RARS2	female	male	168.32	84.2359	132.284	0.997796	0.048009
IER3IP1	female	male	913.374	457.641	718.06	0.996971	0.000452078
NGEF	female	male	371.391	186.125	291.991	0.996805	0.0275064
SFXN2	female	male	1089.31	545.812	856.381	0.996674	0.012335
FDX1	female	male	3474.1	1742.01	2731.77	0.995921	0.00189095
RPL36A	female	male	678.026	340.336	533.302	0.994505	7.06958e-06
PSMB4	female	male	1290.41	647.783	1015	0.993866	0.000251834
VBP1	female	male	183.771	92.4237	144.622	0.991815	0.00625534
ETFB	female	male	4572.79	2301.75	3599.49	0.990394	0.00703575
SNRNP70	female	male	3449.98	1736.62	2715.68	0.990333	0.00641224
PABPN1	female	male	1136.01	572.942	894.693	0.987716	0.00830001
FAU	female	male	1774.93	895.89	1398.2	0.986409	0.00104143
ZNF276	female	male	493.478	249.526	388.927	0.983367	0.010817
MTG1	female	male	374.131	189.219	294.883	0.982975	0.00697565
MECR	female	male	430.967	218.064	339.723	0.982836	0.00208063
DCTN3	female	male	528.053	267.357	416.326	0.981955	0.00163332
LAMTOR5	female	male	543.106	275.214	428.295	0.980758	0.00029188
TIMP2	female	male	2011.3	1019.55	1586.26	0.98043	0.0122476
TMEM145	female	male	64.0945	32.5921	50.5934	0.979832	0.0354746
TARDBP	female	male	230.004	116.573	181.391	0.979263	0.00560634
ABCA7	female	male	722.317	366.294	569.736	0.979134	0.0102215
MOB2	female	male	446.393	226.564	352.18	0.978963	0.00685182
MFSD12	female	male	1127.43	572.06	889.415	0.978799	0.00846155
SEPSECS	female	male	606.998	308.278	478.975	0.977173	0.0190255
ACP6	female	male	449.016	228.165	354.366	0.976129	0.0290787
BLOC1S2	female	male	120.603	61.5054	95.2755	0.975745	0.0348015
ZNF783	female	male	93.263	47.3189	73.5727	0.975154	0.0292167
KIF3C	female	male	134.246	68.3833	106.019	0.974139	0.0338771
TMEM205	female	male	1031.92	525.337	814.81	0.974057	0.0162866
RNASET2	female	male	290.021	147.534	228.955	0.973981	0.0425281
ALAD	female	male	1675.04	853.47	1322.94	0.972854	0.0330151
SUGP2	female	male	236.839	120.972	187.181	0.96865	0.0166945
DCXR	female	male	2643.39	1353.15	2090.43	0.966135	0.00724652
RPL35	female	male	2057.55	1053.35	1627.18	0.96589	3.37911e-05
COQ5	female	male	603.872	309.313	477.632	0.965522	0.0468227
TRIAP1	female	male	84.3069	43.2386	66.7062	0.964484	0.0244028
HARS2	female	male	247.677	127.131	196.014	0.963641	0.00433116
RPS18	female	male	2869.94	1472.21	2270.91	0.96311	0.00150576
STX8	female	male	228.644	117.434	180.982	0.961533	0.0113743
HIBCH	female	male	354.017	181.84	280.227	0.960484	0.0300126
ATP5PF	female	male	2142.23	1101.83	1696.34	0.959031	0.00208063
CCDC39	female	male	245.183	126.313	194.239	0.958883	0.0367583
RPS5	female	male	3935.43	2027.88	3117.91	0.956626	0.00225114
CREG1	female	male	10171.6	5242.43	8059.1	0.956296	0.00985007
MCTS1	female	male	244.704	126.254	193.939	0.956296	0.00526594
CLYBL	female	male	736.946	379.715	583.847	0.956109	0.00902709
ZNF32	female	male	315.068	162.406	249.642	0.956047	0.00257588
MRPS28	female	male	373.585	192.736	296.078	0.955584	0.0281552
HNRNPH1	female	male	2838.25	1464.39	2249.46	0.954728	0.000422487
MLXIPL	female	male	1089.15	562.71	863.533	0.952491	0.0472424
AP2S1	female	male	589.302	304.89	467.411	0.950673	0.000507307
CAMLG	female	male	146.998	76.0212	116.58	0.950163	0.00585931
TMEM208	female	male	383.796	199.034	304.613	0.948053	0.00102212
TST	female	male	762.451	395.269	605.087	0.947527	0.0345552
ANXA4	female	male	4983.73	2586.56	3956.37	0.946176	0.0406527
SELENOM	female	male	290.663	150.977	230.798	0.945812	0.0323715
RPS15	female	male	2477.25	1286.9	1967.1	0.944934	0.0134274
AURKAIP1	female	male	924.825	480.857	734.553	0.943596	0.0106367
SDHD	female	male	2888.43	1504.41	2295.28	0.941064	0.0191921
GJB2	female	male	1044.85	544.55	830.434	0.939929	0.000440511
ADSL	female	male	232.367	121.17	184.711	0.938797	0.0386809
CIB1	female	male	309.209	161.39	245.858	0.938204	0.0117417
TJP3	female	male	184.476	96.3055	146.689	0.937807	0.0492062
NDUFS6	female	male	2439.09	1274.42	1939.94	0.936567	0.00438349
CETN1	female	male	217.988	113.996	173.42	0.935942	0.00554979
RBM5	female	male	582.923	304.904	463.772	0.934672	0.0137919
NDUFB2	female	male	1638.94	857.606	1304.08	0.934371	0.00165811
GMFG	female	male	114.375	59.8976	91.0277	0.93399	0.0456644
C2ORF49	female	male	238.63	124.996	189.929	0.933662	0.00675048
HMGB2	female	male	157.666	82.4269	125.42	0.93267	0.0404527
C1ORF210	female	male	750.796	393.439	597.643	0.932595	8.24e-05
SLC25A3	female	male	4383.66	2300.2	3490.75	0.930293	0.00199624
SGF29	female	male	320.405	168.314	255.223	0.928021	0.0233477
AGMAT	female	male	1868.16	982.54	1488.61	0.926891	0.0019404
ZNF248	female	male	417.907	219.732	332.975	0.926696	0.00409606
PTS	female	male	517.048	271.859	411.967	0.926577	0.00390313
MBD3	female	male	3569.7	1878.47	2844.89	0.926369	0.000252951
PSMG4	female	male	279.506	147.221	222.812	0.925895	0.0151229
COX7A2L	female	male	1550.59	816.171	1235.84	0.925637	0.00409606
HSF2BP	female	male	147.157	77.5739	117.336	0.925112	0.0346721
GGT1	female	male	4544.21	2393.79	3622.6	0.924809	0.0418268
PSMB3	female	male	962.85	507.188	767.566	0.92423	0.0114254
SPDYC	female	male	196.603	103.553	156.724	0.923851	0.0485999
SNRPF	female	male	138.565	73.1239	110.519	0.923308	0.0215985
THRSP	female	male	2448.55	1291.63	1952.72	0.922962	0.0344494
AMZ2	female	male	169.35	89.2501	135.022	0.922351	0.0398222
TTC39C	female	male	820.092	434.878	655.001	0.914734	0.00852091
MTX2	female	male	576.061	305.519	460.114	0.91469	0.0123584
TMBIM4	female	male	623.368	331.289	498.191	0.912196	0.00713594
RPS3	female	male	5304.31	2820.37	4239.76	0.911318	4.42361e-05
RSRC1	female	male	119.749	63.7858	95.7649	0.910269	0.0362707
BABAM1	female	male	666.637	354.817	533	0.910212	0.0398222
GSTA4	female	male	2435.89	1296.42	1947.54	0.909625	0.0161445
MRPS23	female	male	493.195	262.907	394.5	0.908192	0.00270373
TARS2	female	male	192.928	102.968	154.374	0.905703	0.0466666
CLK4	female	male	539.366	288.176	431.713	0.903877	0.034731
FMO5	female	male	3278.72	1752.88	2624.79	0.903354	0.0250926
RDH16	female	male	1576.83	843.263	1262.44	0.902797	0.00319169
PTMS	female	male	3230.54	1728.96	2587	0.901911	0.0267477
IGBP1	female	male	357.417	191.527	286.321	0.899732	0.00249635
LAMTOR4	female	male	507.305	272.285	406.582	0.89851	0.0228334
COA6	female	male	117.585	63.1291	94.2465	0.897828	0.0146757
ATP2B2	female	male	234.065	125.678	187.613	0.897413	0.00977639
POLR2I	female	male	260.189	139.814	208.6	0.896986	0.0213652
COQ2	female	male	74.5723	40.0731	59.787	0.896781	0.0459933
MGST1	female	male	6607	3552.65	5297.99	0.895068	0.0206697
CMTM8	female	male	503.397	270.938	403.772	0.89285	0.0437726
TM2D3	female	male	313.155	168.908	251.335	0.892477	0.0371825
GYAR	female	male	1386.98	747.536	1112.93	0.891724	0.00779418
SNRPG	female	male	331.787	178.747	266.199	0.890723	0.00645409
STX16	female	male	677.627	365.769	543.974	0.88905	0.0228631
PDE1C	female	male	206.909	111.903	166.192	0.888499	0.0157055
YAE1	female	male	319.622	172.562	256.596	0.888333	0.0269353
CSK	female	male	376.358	203.502	302.277	0.887734	0.0370698
ANAPC15	female	male	268.43	145.05	215.553	0.887662	0.00509005
PNISR	female	male	1155.51	624.651	928.002	0.887226	0.00272756
FN3K	female	male	300.03	162.439	241.062	0.885245	0.0274828
ANKRD23	female	male	262.948	142.515	211.334	0.884143	0.0384861
TRAPPC13	female	male	554.473	300.576	445.66	0.883392	0.0206697
MRPL39	female	male	311.905	169.408	250.835	0.881489	0.00693691
ELOF1	female	male	380.154	206.578	305.764	0.880855	0.0100706
RPL30	female	male	2893.25	1571.49	2326.78	0.880669	0.00107915
DDO	female	male	558.778	303.783	449.495	0.879636	0.00506078
NDUFAF8	female	male	305.439	166.127	245.734	0.87879	0.0354746
TJAP1	female	male	174.107	94.7672	140.104	0.878249	0.034805
CPQ	female	male	190.753	103.819	153.496	0.878175	0.0170497
TEX30	female	male	106.962	58.2642	86.0914	0.877702	0.0495793
CYCS	female	male	4643.74	2528.69	3737.29	0.876796	0.0103285
RPL18A	female	male	2287.07	1248.13	1841.81	0.873722	0.000809539
TRMT61A	female	male	137.953	75.2817	111.094	0.871377	0.0226577
CYB5B	female	male	1471.45	805.978	1186.25	0.868371	0.0180094
JPT1	female	male	174.982	96.0511	141.154	0.865613	0.0463047
TRMT112	female	male	597.08	327.814	481.681	0.865433	0.00790091
COQ6	female	male	178.635	97.9768	144.067	0.864969	0.0134274
EXOSC7	female	male	288.117	158.611	232.615	0.863057	0.00771694
SURF1	female	male	214.966	118.188	173.49	0.862149	0.0104273
NDUFS7	female	male	2185.73	1203.55	1764.8	0.860879	0.0170133
MRPL2	female	male	553.365	305.443	447.113	0.857031	0.0213836
DQX1	female	male	99.1575	54.844	80.166	0.854297	0.0406843
AKR1A1	female	male	1937.45	1072.66	1566.82	0.853083	0.0154252
SPCS2	female	male	924.85	513.965	748.757	0.848074	0.0320498
TMEM67	female	male	275.513	153.141	223.067	0.847483	0.00317224
CEACAM1	female	male	2056.27	1143.26	1664.98	0.846935	0.0477871
TAF11	female	male	400.668	222.622	324.362	0.846827	0.00314092
MACROD1	female	male	722.896	402.375	585.53	0.845365	0.00868463
GLRX5	female	male	646.182	359.766	523.432	0.844776	0.00474603
SLC35A5	female	male	380.511	212.047	308.312	0.843694	0.00425435
INPP5B	female	male	907.565	506.015	735.472	0.842789	0.0206942
C4BPB	female	male	803.569	448.218	651.275	0.842429	0.034706
RAB14	female	male	2161.48	1206.82	1752.34	0.841101	0.000828965
RPL22	female	male	2044.47	1142.49	1657.91	0.839739	0.00191914
PPM1K	female	male	592.779	331.268	480.703	0.838625	0.0272527
APOC1	female	male	61835.7	34580.7	50155	0.83847	0.00573474
PRDX6	female	male	7066.08	3951.72	5731.35	0.838418	0.0122855
RPS14	female	male	3328.36	1864.35	2700.93	0.836155	0.00187802
SAFB2	female	male	815.951	457.461	662.312	0.834531	0.0106367
COPS5	female	male	916.377	513.953	743.909	0.8345	0.0320055
RPLP2	female	male	1936.01	1086.23	1571.82	0.833846	0.00846155
ADPRM	female	male	308.957	173.517	250.911	0.833799	0.033331
SPP2	female	male	46387	26030.8	37662.9	0.833505	0.00197284
HACD3	female	male	2088.46	1172	1695.69	0.833501	3.16533e-05
TMEM70	female	male	300.616	169.065	244.237	0.830641	0.00153336
COPZ2	female	male	437.858	246.262	355.745	0.829799	0.0163397
PPP1R7	female	male	379.417	213.545	308.329	0.829706	0.00861716
RCN2	female	male	523.374	294.76	425.397	0.829426	0.0374041
FDFT1	female	male	1188.46	669.593	966.089	0.828082	0.0460039
TYMP	female	male	4990.2	2814.12	4057.6	0.826426	0.0380735
UXT	female	male	115.091	64.8597	93.5632	0.824857	0.0283539
ZRANB2	female	male	987.173	557.494	803.025	0.823979	0.0079571
ASPG	female	male	614.753	348.004	500.432	0.820549	0.0175543
NKAP	female	male	162.418	92.0254	132.249	0.818853	0.0499273
MTCH2	female	male	1359.89	771.407	1107.68	0.817953	0.0334442
TAF10	female	male	494.929	281.101	403.289	0.816488	0.00337949
PEX12	female	male	115.878	65.7829	94.4084	0.816277	0.0226577
FAM32A	female	male	785.322	446.256	640.008	0.81568	0.00151966
COA5	female	male	437.615	248.807	356.698	0.814951	0.0191921
MRPL34	female	male	356.875	203.113	290.977	0.814179	0.0290787
COMMD5	female	male	1172.34	667.402	955.94	0.812615	0.0157886
PRICKLE4	female	male	246.807	140.642	201.307	0.810887	0.0453559
UCHL3	female	male	172.028	98.213	140.393	0.81013	0.0211415
CCSMST1	female	male	290.504	165.81	237.064	0.809538	0.0398102
D2HGDH	female	male	399.552	228.182	326.108	0.808503	0.0492899
PSMD8	female	male	1736.16	991.487	1417.01	0.808335	0.0032804
ZNF658	female	male	232.522	132.685	189.735	0.807981	0.0454832
ATP5F1D	female	male	3774.12	2156.13	3080.7	0.807757	0.00276039
CDK10	female	male	278.182	159.146	227.166	0.805836	0.03222
SNX7	female	male	184.906	105.812	151.009	0.804971	0.0475072
PSMC6	female	male	1272.54	728.525	1039.39	0.804692	0.0279272
BRAT1	female	male	151.013	86.5139	123.371	0.802734	0.0434317
SRRM2	female	male	10312.7	5917.65	8429.1	0.801342	0.0444124
LIPT1	female	male	147.026	84.4646	120.214	0.8012	0.0240693
RPL26	female	male	2225.02	1278.22	1819.25	0.799792	0.00337949
ATP6V1H	female	male	264.154	151.781	215.994	0.79974	0.0168858
AP4S1	female	male	177.155	101.838	144.876	0.798968	0.0462489
PSMC2	female	male	771.647	443.897	631.183	0.797224	0.00818978
MED7	female	male	125.907	72.5899	103.057	0.794311	0.0391164
NSMCE4A	female	male	576.769	332.92	472.262	0.792551	0.0061645
NDUFAF2	female	male	281.44	162.758	230.576	0.791082	0.00827687
C2CD5	female	male	164.86	95.1975	135.005	0.790529	0.0175353
SUMO1	female	male	1021.23	591.408	837.022	0.787928	0.00319759
ZNF383	female	male	198.669	115.553	163.047	0.783907	0.0128659
DERA	female	male	573.438	333.815	470.742	0.780853	0.00825124
SGK2	female	male	809.555	471.196	664.544	0.780427	0.00168426
NACA	female	male	2841.8	1655.48	2333.38	0.779602	0.00145794
PTPA	female	male	1722.08	1007.19	1415.7	0.774114	0.0433212
CHCHD10	female	male	8337.1	4875.23	6853.45	0.774081	0.00779418
GMNN	female	male	162.07	94.8196	133.248	0.773271	0.0316714
JKAMP	female	male	445.214	261.022	366.275	0.770131	0.0437742
TSPO	female	male	527.862	309.954	434.473	0.768486	0.0364278
KDRL	female	male	814.533	478.022	670.314	0.768411	0.0283539
TMED1	female	male	239.267	140.589	196.976	0.7682	0.0292167
RPL36	female	male	184.038	108.145	151.513	0.765859	0.0370698
NGLY1	female	male	356.057	209.429	293.217	0.765502	0.0130266
TMEM50A	female	male	230.067	135.317	189.46	0.76405	0.0334782
HTRA2	female	male	181.727	107.082	149.736	0.763071	0.0398412
BCS1L	female	male	200.011	117.911	164.825	0.762857	0.0293129
H2AZ1	female	male	627.018	369.784	516.775	0.762571	0.0296674
PEX3	female	male	224.49	132.27	184.967	0.761951	0.0214166
RPS2	female	male	13604	8023.99	11212.6	0.761646	0.00757002
NSA2	female	male	834.114	492.618	687.758	0.760148	0.00764789
MTG2	female	male	470.394	277.758	387.836	0.759598	0.0237865
CCDC9	female	male	310.466	183.549	256.073	0.758634	0.0354746
QPRT	female	male	1627.37	962.154	1342.28	0.758093	0.0480479
KAT8	female	male	336.684	199.274	277.794	0.757729	0.0406527
SPTSSA	female	male	674.733	398.978	556.553	0.75759	0.0210858
OCEL1	female	male	311.514	184.646	257.142	0.756071	0.0254937
MRPL9	female	male	660.605	391.476	545.264	0.755322	0.0432361
MRPL20	female	male	742.723	441.965	613.827	0.749618	0.00392301
MIER2	female	male	568.83	338.463	470.101	0.748424	0.0242672
SEM1	female	male	510.246	303.795	421.767	0.747967	0.00260383
EIF3K	female	male	987.521	588.172	816.371	0.747738	0.0105087
COX5B	female	male	3379.91	2013.15	2794.16	0.747447	0.0168958
SPCS3	female	male	634.68	378.281	524.795	0.746907	0.034805
RASSF4	female	male	664.891	396.319	549.788	0.746751	0.0170378
SERF1	female	male	177.644	105.976	146.929	0.744892	0.0362792
NCAPH2	female	male	925.289	552.363	765.463	0.744549	0.0451816
DNASE2B	female	male	1963.64	1173.25	1624.9	0.742959	0.0307876
C10ORF143	female	male	424.58	254.179	351.551	0.74119	0.0473916
CHURC1	female	male	560.021	335.361	463.738	0.739824	0.0215985
BTK	female	male	819.151	491.214	678.606	0.737486	0.014758
FBXW5	female	male	5946.17	3567.19	4926.61	0.737223	0.0196723
MED4	female	male	392.248	235.447	325.048	0.736536	0.0313359
SMARCA1	female	male	177.583	106.77	147.235	0.735711	0.0406527
SAP18	female	male	843.508	506.796	699.203	0.735224	0.0148721
PTER	female	male	187.928	112.771	155.718	0.735211	0.0488901
SERF2	female	male	1197.39	719.683	992.658	0.734836	0.0376982
UPRT	female	male	193.597	116.275	160.459	0.734503	0.0145575
PHYH	female	male	68701	41300.7	56958	0.734164	0.026607
SRGN	female	male	702.718	423.309	582.971	0.731481	0.035242
NATD1	female	male	329.14	198.218	273.03	0.731102	0.0424101
GALE	female	male	1539.85	929.467	1278.26	0.728674	0.0246466
EFNA2	female	male	278.951	168.527	231.627	0.7271	0.0117017
SLC35B3	female	male	407.172	246.2	338.184	0.726992	0.00807941
UTP18	female	male	240.153	145.099	199.416	0.726804	0.0150148
RPS3A	female	male	5445.62	3296.65	4524.63	0.724198	0.00187802
TRMT10C	female	male	162.702	98.5804	135.221	0.722329	0.0386809
AMN	female	male	2138.41	1296.51	1777.6	0.722037	0.0241991
MRRF	female	male	323.766	196.468	269.21	0.719415	0.0478165
HYKK	female	male	1259.17	765.894	1047.77	0.716944	0.0130266
NDUFA6	female	male	1296.31	788.785	1078.8	0.716798	0.0312331
HNRNPA1	female	male	1455.02	887.59	1211.84	0.712827	0.0148132
NDUFB9	female	male	3534.8	2156.63	2944.16	0.712812	0.037069
VEGFB	female	male	1945.93	1187.55	1620.91	0.712661	0.0157198
VDAC2	female	male	1087.77	664.054	906.175	0.711711	0.0124181
MTX3	female	male	175.011	106.836	145.793	0.711305	0.0473244
TAB1	female	male	273.693	167.321	228.105	0.710927	0.0361578
RPS9	female	male	2926.29	1788.71	2438.75	0.710269	0.0146489
MBL1	female	male	3955.55	2421.61	3298.15	0.707865	0.00295492
RPS7	female	male	4334.19	2653.61	3613.94	0.707859	0.00848152
MRPS11	female	male	444.487	272.214	370.656	0.707758	0.0398412
HNRNPA3	female	male	3451.78	2114.54	2878.67	0.706929	0.0283539
WASHC3	female	male	370.566	227.002	309.039	0.706733	0.0244103
AOPEP	female	male	622.891	382.069	519.682	0.704896	0.0405367
CCNC	female	male	943.121	579.125	787.123	0.703817	0.00202076
SLC39A8	female	male	1730.91	1063.25	1444.77	0.7031	0.0241334
RPL12	female	male	3931.39	2415.11	3281.55	0.703049	0.0124341
FAM162A	female	male	886.714	544.914	740.228	0.702266	0.0032804
RPL10	female	male	3322.32	2044.76	2774.79	0.70041	0.0152589
MRPL51	female	male	1223.62	753.176	1022	0.700343	0.0456738
CCDC28A	female	male	203.478	125.257	169.955	0.700302	0.0331966
PEBP1	female	male	2940.3	1811.07	2456.34	0.699045	0.0456738
TAF15	female	male	613.786	378.263	512.847	0.698467	0.00834266
SRSF11	female	male	1399.09	862.285	1169.03	0.697995	0.0365507
RIOK2	female	male	291.801	180.299	244.014	0.695122	0.0463145
C6ORF47	female	male	4656.54	2876.51	3893.67	0.694906	0.0466165
PSMB5	female	male	1743.73	1077.52	1458.21	0.694483	0.0303351
TARBP2	female	male	262.046	162.957	219.579	0.686205	0.0253049
TMEM87B	female	male	430.496	267.687	360.72	0.685154	0.0207658
ACP1	female	male	577.934	360.029	484.546	0.682959	0.0340515
TPD52L1	female	male	587.88	366.522	493.012	0.681521	0.0308849
RPS27L	female	male	917.493	572.388	769.591	0.680821	0.00974221
ZNF787	female	male	275.921	172.367	231.541	0.679881	0.0260689
PON1	female	male	18664.8	11651.3	15659	0.679825	0.0199148
ZNF354A	female	male	239.768	149.901	201.254	0.677484	0.0396829
RAB12	female	male	479.964	301.143	403.326	0.672403	0.0465499
RTN3	female	male	1937.9	1218.89	1629.75	0.668828	0.0116234
CDK5RAP3	female	male	305.054	192.019	256.61	0.668273	0.041448
FAM204A	female	male	275.481	173.805	231.905	0.664931	0.0351286
CST7	female	male	1728.83	1091.58	1455.72	0.663316	0.0396829
CHCHD2	female	male	3858.11	2437.42	3249.24	0.662516	0.00645409
UGP2	female	male	3506	2216.49	2953.35	0.6616	0.0138499
BROX	female	male	287.754	181.896	242.387	0.661318	0.0250926
ELP2	female	male	906.665	574.589	764.347	0.657596	0.019521
KYAT1	female	male	2639.22	1676.36	2226.56	0.654957	0.0332499
FANCE	female	male	3010.73	1912.3	2539.97	0.65481	0.0406527
RCN3	female	male	1529.58	972.843	1290.98	0.652841	0.015093
ERP29	female	male	2381.54	1516.53	2010.82	0.65116	0.035064
RNF126	female	male	2126.32	1356.23	1796.28	0.648798	0.0375759
AKR7A2	female	male	1229.64	785.228	1039.18	0.647099	0.016854
RPL17	female	male	3304.92	2113.45	2794.29	0.645098	0.00512432
NDUFA4	female	male	3426.06	2194.18	2898.11	0.642887	0.0242605
ETFA	female	male	3913.34	2508.33	3311.19	0.641704	0.0173016
UBA52	female	male	2628.95	1686.02	2224.84	0.640972	0.0185425
TMEM59	female	male	2521.93	1617.72	2134.41	0.640721	0.007921
ATP5F1A	female	male	11787.8	7568.74	9979.62	0.639144	0.0477552
SYCE2	female	male	325.673	209.151	275.735	0.638487	0.0363157
GMFB	female	male	474.037	304.865	401.535	0.637414	0.0267132
ATP5MC2	female	male	1845.14	1187.2	1563.17	0.636028	0.0304939
ATG5	female	male	262.222	169.203	222.357	0.63286	0.0380673
NEDD8	female	male	672.607	434.873	570.721	0.629764	0.0134038
NIT1	female	male	1707.21	1108.48	1450.61	0.623317	0.0157563
MRPS18C	female	male	317.276	206.435	269.773	0.619365	0.0466666
PRDX5	female	male	2214.56	1445.19	1884.83	0.615922	0.0346721
PSMB6	female	male	1422.27	928.444	1210.63	0.61549	0.00920623
HDAC3	female	male	322.5	210.623	274.553	0.613786	0.0324451
SCLY	female	male	1592.09	1043.97	1357.18	0.608872	0.0165585
RAB5IF	female	male	1042.92	685.251	889.633	0.605976	0.0224792
RPS25	female	male	5064.79	3334.03	4323.04	0.603277	0.0187864
UQCRFS1	female	male	3693.74	2438.26	3155.68	0.599145	0.0497083
RPS16	female	male	2985.74	1971.41	2551.03	0.598981	0.0386809
EIF3M	female	male	876.56	579.827	749.389	0.596511	0.0363989
ETHE1	female	male	922.085	611.466	788.963	0.592399	0.0226556
RPL13	female	male	3553.57	2358.13	3041.24	0.591727	0.0386809
PARK7	female	male	1451.38	963.606	1242.34	0.590788	0.028233
WDR11	female	male	358.553	238.153	306.953	0.590043	0.0332499
C17ORF75	female	male	419.375	279.101	359.257	0.586717	0.0491342
GNB2L1	female	male	4126.21	2749.89	3536.36	0.585521	0.0121554
ALDH2	female	male	12342.4	8235.26	10582.2	0.583756	0.0363989
RPS10	female	male	4919.13	3285.65	4219.07	0.582226	0.0232296
VPS26C	female	male	362.108	242.296	310.76	0.579836	0.0400004
RPSA	female	male	6866.94	4596.83	5894.03	0.578991	0.00646593
MRPL3	female	male	418.203	281.475	359.605	0.570946	0.0267731
HSPD1	female	male	3399.43	2294.53	2925.9	0.567101	0.0464794
SLC12A6	female	male	1043.89	707.017	899.514	0.562599	0.0224214
DIPK2A	female	male	399.398	270.659	344.224	0.561119	0.0449519
FTCD	female	male	5022.98	3411.53	4332.36	0.558111	0.0224565
LYAR	female	male	430.788	292.922	371.703	0.556761	0.0444124
CIR1	female	male	426.96	291.547	368.926	0.550082	0.0499273
RPL5	female	male	3317.26	2298.48	2880.64	0.529442	0.0475691
PSMA7	female	male	1784.45	1242.1	1552.01	0.5225	0.0207185
PRXL2A	female	male	1608.2	1126.89	1401.93	0.513316	0.0418878
RPL21	female	male	3726.8	2612.97	3249.45	0.512293	0.0340457
ZBTB8A	female	male	1146.39	804.245	999.758	0.511561	0.0444999
DECR2	female	male	2510.73	1785.1	2199.74	0.492046	0.0485857
NME2	female	male	3974.45	2827.54	3482.92	0.491208	0.0365507
ACSF2	female	male	1291.94	922.117	1133.44	0.486431	0.0473916
HNRNPA2B1	female	male	6787.71	4929.73	5991.43	0.461473	0.0479478
MAN2B1	female	male	1086.84	1511.83	1268.98	-0.476327	0.0353546
KIAA1109	female	male	512.944	729.231	605.638	-0.508045	0.0424176
CALCOCO1	female	male	457.857	651.388	540.799	-0.5084	0.0425281
NUMA1	female	male	823.34	1189.19	980.131	-0.530514	0.0416979
ZSWIM8	female	male	777.929	1124.88	926.623	-0.532376	0.0440636
CLASP1	female	male	233.482	338.365	278.432	-0.53533	0.0421192
EPS8L2	female	male	926.804	1343.4	1105.34	-0.535422	0.0240458
WDFY3	female	male	349.028	509.396	417.757	-0.544939	0.0475228
GPAT4	female	male	329.975	482.273	395.245	-0.547107	0.0442418
DAZAP2	female	male	1027.21	1502.05	1230.72	-0.548335	0.0283539
F12	female	male	664.352	977.17	798.417	-0.556947	0.0220467
GPX3	female	male	58772.4	86689	70736.7	-0.560706	0.0305202
PEAK1	female	male	209.707	311.671	253.406	-0.57081	0.0462489
ITIH1	female	male	16302.7	24326.8	19741.6	-0.577421	0.0186823
SNAP23	female	male	464.193	694.118	562.733	-0.579718	0.040277
SMG9	female	male	231.623	346.029	280.655	-0.58002	0.0444179
ILRUN	female	male	4258.77	6369.33	5163.3	-0.580641	0.0347859
PPFIA1	female	male	433.707	650.356	526.556	-0.584321	0.0242527
EFTUD2	female	male	379.257	568.702	460.448	-0.585128	0.0473916
VCL	female	male	240.304	360.78	291.937	-0.586322	0.0368352
MSI2	female	male	414.182	622.15	503.311	-0.58763	0.0349069
FAM168B	female	male	782.435	1176.57	951.348	-0.588522	0.0242672
NR5A2	female	male	1709.76	2573.19	2079.8	-0.589695	0.0180153
PRKAR1A	female	male	845.268	1281.39	1032.18	-0.599975	0.0477552
CLOCK	female	male	361.77	549.167	442.083	-0.602346	0.0406204
SKI	female	male	826.616	1256.58	1010.89	-0.603928	0.0147729
TYK2	female	male	786.503	1196.16	962.071	-0.605079	0.00766193
GDPD5	female	male	250.994	381.983	307.132	-0.605408	0.0180381
BDP1	female	male	289.853	441.333	354.773	-0.606051	0.0477552
GSK3B	female	male	435.045	665.803	533.942	-0.614226	0.0207658
PHF12	female	male	238.421	366.082	293.133	-0.618533	0.0428778
PTP4A2	female	male	1554.66	2391.53	1913.32	-0.621232	0.0292167
SLC45A4	female	male	475.021	732.61	585.416	-0.624934	0.0135029
LBR	female	male	206.696	319.319	254.963	-0.627425	0.028876
ARHGAP29	female	male	518.351	801.335	639.63	-0.628803	0.0454299
ATP6AP1	female	male	483.433	749.776	597.58	-0.632665	0.0287279
RALGAPB	female	male	370.899	575.008	458.374	-0.633176	0.026683
DAG1	female	male	329.155	510.427	406.843	-0.633762	0.0457834
PHACTR2	female	male	424.135	658.449	524.555	-0.635522	0.0410343
AKIRIN2	female	male	357.122	556.018	442.363	-0.63822	0.0365534
ACTB	female	male	4941.58	7699.06	6123.36	-0.639747	0.0434497
ATP7A	female	male	325.628	508.01	403.792	-0.64091	0.0307876
STX12	female	male	362.169	566.252	449.633	-0.644851	0.0211232
THOC3	female	male	567.007	887.138	704.206	-0.646274	0.0203534
CHD8	female	male	602.25	944.077	748.747	-0.649245	0.0354655
RAB7A	female	male	1713.95	2689.06	2131.86	-0.649615	0.0064895
ATP6V0A1	female	male	505.067	794.277	629.014	-0.653977	0.0334024
DENND5A	female	male	302.147	475.247	376.333	-0.654243	0.0223187
MROH1	female	male	374.283	589.063	466.332	-0.654612	0.0195359
FOXN3	female	male	707.588	1114.63	882.034	-0.655587	0.0334442
BAP1	female	male	739.266	1165.34	921.871	-0.65655	0.0267621
TBC1D20	female	male	302.266	476.803	377.068	-0.657181	0.0495103
SYMPK	female	male	509.766	804.234	635.967	-0.657284	0.0160762
UNC93B1	female	male	263.608	416.032	328.933	-0.658671	0.0402188
TECR	female	male	1564.96	2473.63	1954.39	-0.660461	0.00675048
INSR	female	male	2044.95	3234.03	2554.55	-0.661162	0.0348446
IFRD1	female	male	705.537	1116.42	881.631	-0.662481	0.0226295
PATL1	female	male	313.784	496.696	392.175	-0.663635	0.0424176
RGL2	female	male	1602.46	2538.79	2003.74	-0.663802	0.00132731
NFIA	female	male	1113.15	1766.3	1393.07	-0.665975	0.017442
ACTN4	female	male	1524.77	2422.7	1909.6	-0.668032	0.045681
EEF2	female	male	17839.2	28365.6	22350.5	-0.669089	0.0136603
KDM3B	female	male	464.477	738.57	581.945	-0.669596	0.026683
AGO2	female	male	377.155	599.877	472.607	-0.66988	0.0337324
CYP8B1	female	male	8231.2	13098.6	10317.2	-0.670239	0.0160762
CTSA	female	male	2512.1	3998.73	3149.23	-0.670661	0.0054176
KIAA2026	female	male	452.808	720.689	567.614	-0.671071	0.0364278
DAB2	female	male	690.296	1099.31	865.588	-0.671268	0.0484569
TAOK1	female	male	584.936	932.23	733.776	-0.672498	0.0155078
SOCS7	female	male	169.504	270.221	212.668	-0.672988	0.0466666
TRAF4	female	male	710.523	1134.9	892.401	-0.675227	0.0495612
KCTD10	female	male	185.243	296.475	232.914	-0.678553	0.0263117
CPD	female	male	600.547	961.263	755.14	-0.678759	0.028876
BCL7B	female	male	273.45	437.652	343.822	-0.678897	0.0332499
LRRC8A	female	male	1283.43	2054.9	1614.06	-0.678955	0.0256636
YWHAZ	female	male	596.584	957.98	751.468	-0.683383	0.0166671
CC2D1A	female	male	135.115	217.315	170.344	-0.685397	0.0477552
PLCB1	female	male	361.971	581.959	456.251	-0.686095	0.0100706
AFF1	female	male	379.307	610.388	478.342	-0.686965	0.0290601
ZNF236	female	male	145.701	235.392	184.14	-0.691611	0.0410452
OTUD7B	female	male	420.057	678.851	530.969	-0.692341	0.0145213
SMARCA5	female	male	549.556	888.697	694.902	-0.693184	0.0210529
CNOT1	female	male	1413.01	2286.03	1787.16	-0.694193	0.0466666
USP22	female	male	629.683	1019.42	796.713	-0.695317	0.0178652
STAM	female	male	143.107	231.786	181.112	-0.697345	0.0480479
SLC5A2	female	male	84.9048	137.811	107.579	-0.697439	0.0495151
LAMC1	female	male	488.424	793.102	619	-0.700283	0.0498868
BOD1L1	female	male	340.816	555.372	432.768	-0.704688	0.0169709
PLEKHM1	female	male	291.877	475.883	370.737	-0.704741	0.00724652
PAFAH1B2	female	male	508.384	829.453	645.985	-0.705608	0.0434925
BRD4	female	male	649.945	1060.22	825.776	-0.706107	0.028323
VMP1	female	male	1187.43	1937.52	1508.9	-0.706434	0.0168539
HIF1A	female	male	616.126	1005.85	783.15	-0.707016	0.0290428
ZFP91	female	male	1014.89	1656.76	1289.98	-0.707267	0.0159575
ZFAND5	female	male	617.871	1009.1	785.542	-0.708176	0.0144274
CLEC16A	female	male	277.969	454.23	353.509	-0.708629	0.0148436
ATAD3	female	male	367.713	601	467.693	-0.708633	0.0455696
TOP1	female	male	544.71	890.664	692.976	-0.708851	0.0483842
CD163	female	male	1360.78	2226.67	1731.88	-0.710354	0.00426263
WAPL	female	male	875.891	1433.86	1115.02	-0.710992	0.035242
USP24	female	male	796.354	1304.17	1013.99	-0.711565	0.0495103
PLD3	female	male	1757.49	2880.96	2238.97	-0.71307	0.00905187
SECISBP2L	female	male	641.864	1052.24	817.738	-0.71338	0.0216253
SEC14L1	female	male	326.117	535.778	415.972	-0.71633	0.0138097
ATP13A1	female	male	620.679	1020.24	791.918	-0.716831	0.0211321
MAPKAPK2	female	male	996.533	1638.21	1271.54	-0.717121	0.0296674
PER1	female	male	1164.93	1919.19	1488.19	-0.720451	0.0386809
SRCAP	female	male	574.878	947.175	734.434	-0.72059	0.01862
ARIH2	female	male	976.285	1610.2	1247.96	-0.722244	0.0355147
ANKRD52	female	male	321.241	530.08	410.744	-0.722392	0.0301745
WASF2	female	male	713.025	1176.53	911.669	-0.722882	0.00323452
SGPL1	female	male	1028.58	1697.85	1315.41	-0.723356	0.0249767
STRN	female	male	242.724	401.11	310.604	-0.725796	0.0157169
KMT5B	female	male	186.635	309.11	239.124	-0.72685	0.0183293
TNIP1	female	male	1210.44	2003.57	1550.35	-0.727276	0.014748
GATAD2B	female	male	289.277	479.016	370.593	-0.727717	0.00622939
KIF1B	female	male	758.025	1255.27	971.131	-0.727738	0.0446574
FAM126B	female	male	1170.92	1942.05	1501.4	-0.729902	0.00982819
PHF2	female	male	143.27	237.276	183.558	-0.730298	0.0229557
SORBS1	female	male	844.798	1401.32	1083.31	-0.73035	0.0134274
SPTBN1	female	male	2106.68	3496.27	2702.22	-0.730747	0.0228246
RELL1	female	male	195.371	324.003	250.499	-0.731535	0.0164545
WWP1	female	male	809.181	1343.6	1038.22	-0.731704	0.014758
ZMIZ1	female	male	396.262	657.534	508.236	-0.731707	0.0268427
PPP2R5D	female	male	277.804	461.346	356.465	-0.732371	0.0281552
MIER1	female	male	292.68	486.283	375.653	-0.733016	0.00914708
TOR1AIP1	female	male	630.219	1048.56	809.508	-0.733973	0.00593006
MOB3A	female	male	155.135	258.368	199.378	-0.734365	0.0452173
HMGCS2	female	male	18693	31110.8	24014.9	-0.734927	0.0462051
ARID1A	female	male	715.7	1191.31	919.534	-0.735185	0.0294724
STK10	female	male	299.188	498.356	384.545	-0.735903	0.0306319
E2F5	female	male	96.5267	161.037	124.174	-0.736747	0.0331212
MCCC2	female	male	947.422	1578.28	1217.79	-0.736758	0.0169622
RASGEF1B	female	male	1180.83	1968.25	1518.3	-0.737164	0.0392387
ASH1L	female	male	1032.84	1721.99	1328.19	-0.737627	0.00914708
GFOD1	female	male	315.271	525.257	405.265	-0.737673	0.0348015
TMOD3	female	male	209.439	349.546	269.485	-0.738115	0.047201
LAMC3	female	male	258.577	431.134	332.53	-0.738881	0.0391164
ZNF358	female	male	458.125	764.812	589.562	-0.739472	0.0198706
AKT2	female	male	986.674	1649.33	1270.67	-0.741127	0.00697565
PLIN5	female	male	651.499	1090.19	839.509	-0.74258	0.0132462
RALGDS	female	male	201.222	336.65	259.262	-0.743265	0.00508743
SH3D19	female	male	476.191	797.887	614.061	-0.744535	0.0480679
CYLD	female	male	583.412	977.885	752.472	-0.745083	0.0255559
MED13	female	male	484.53	812.531	625.102	-0.746349	0.0385139
ADAR	female	male	539.725	905.412	696.448	-0.746377	0.0460017
SELENOP	female	male	23986.7	40243.3	30953.9	-0.746534	0.0217007
ZXDB	female	male	126.284	212.09	163.058	-0.748206	0.0444488
TFR2	female	male	1800.22	3027.32	2326.12	-0.750024	0.0130266
GRK2	female	male	465.31	783.211	601.553	-0.751168	0.0079571
SPEN	female	male	469.317	791.174	607.256	-0.753637	0.0166776
HTT	female	male	356.78	601.765	461.774	-0.75446	0.00658806
CHRM2	female	male	989.751	1670.2	1281.37	-0.755023	0.0314061
FASTKD5	female	male	187.144	315.785	242.276	-0.755263	0.0121554
JAK1	female	male	1692.28	2859.52	2192.52	-0.756791	0.00192296
YTHDF3	female	male	1188.06	2010.55	1540.56	-0.759011	0.00651195
CRKL	female	male	470.786	797.279	610.711	-0.75954	0.0215245
MIDEAS	female	male	221.558	375.227	287.416	-0.760401	0.0354381
HMBOX1	female	male	398.895	676.222	517.75	-0.761782	0.00685182
YEATS2	female	male	240.204	407.501	311.903	-0.762513	0.0255493
PPME1	female	male	225.022	382.106	292.344	-0.763177	0.0134274
PELI1	female	male	95.1914	161.367	123.552	-0.763361	0.0230906
ACVR1B	female	male	376.676	639.492	489.311	-0.763929	0.0305756
SNRPC	female	male	227.999	388.312	296.704	-0.767409	0.0341976
KMT2C	female	male	642.101	1094.11	835.82	-0.768956	0.0202882
IQGAP1	female	male	304.041	519.774	396.498	-0.773691	0.00653401
USP31	female	male	242.603	414.901	316.445	-0.774019	0.0490399
MCMBP	female	male	394.227	674.006	514.132	-0.774028	0.0183293
UBAP2L	female	male	480.521	822.019	626.877	-0.77421	0.00923696
CHPF	female	male	443.529	759.962	579.143	-0.776751	0.0283539
FBXO34	female	male	276.939	474.679	361.685	-0.777605	0.0295509
CHST7	female	male	116.667	199.996	152.379	-0.777969	0.0406527
NCOA4	female	male	1708.05	2929	2231.32	-0.77819	0.0275788
NUP62	female	male	306.207	525.597	400.231	-0.778823	0.0290787
IGSF11	female	male	440.979	756.328	576.128	-0.779256	0.0394601
ST3GAL1	female	male	1137.86	1954	1487.64	-0.779858	0.00611533
TUBA1C	female	male	1211.88	2081.09	1584.4	-0.780387	0.0314918
SPECC1L	female	male	410.371	705.097	536.682	-0.78198	0.02331
NAPA	female	male	997.623	1715.55	1305.31	-0.782123	0.000506183
FBXO11	female	male	357.368	614.42	467.533	-0.782142	0.0308029
GAREM1	female	male	659.982	1137.53	864.645	-0.78521	0.0241991
PNPLA2	female	male	2930.89	5052.01	3839.94	-0.785502	0.0495103
ZNF574	female	male	90.3167	155.891	118.42	-0.786357	0.0233179
TUBB5	female	male	485.474	838.3	636.685	-0.787637	0.0465544
ZBTB38	female	male	564.54	976.148	740.944	-0.789922	0.012755
CARM1	female	male	117.263	203.362	154.163	-0.792922	0.0114395
ZYX	female	male	362.256	628.36	476.301	-0.794832	0.0281552
DUSP16	female	male	260.959	453.168	343.334	-0.795208	0.0105087
PTPRF	female	male	2530.08	4398.86	3330.99	-0.797964	0.034694
TXNDC11	female	male	3535.38	6149.54	4655.73	-0.798573	0.00856239
SH2B3	female	male	240.254	418.334	316.574	-0.800269	0.0386809
IGF1	female	male	2598.58	4528.25	3425.58	-0.801361	0.0482318
ZNF217	female	male	126.475	220.248	166.663	-0.801592	0.0473244
WDFY4	female	male	80.3687	140.473	106.128	-0.80215	0.0314061
MYO1C	female	male	1368.76	2386.76	1805.05	-0.802172	0.0232296
SP1	female	male	464.211	810.345	612.554	-0.803435	0.0186823
NCKIPSD	female	male	263.759	460.388	348.029	-0.803778	0.035064
DCP1A	female	male	149.23	260.558	196.942	-0.803885	0.0140072
RBM27	female	male	296.529	517.811	391.364	-0.804519	0.00786795
PAXIP1	female	male	237.676	415.574	313.918	-0.804835	0.0210858
MEF2A	female	male	316.32	552.355	417.477	-0.805264	0.00495338
PANK2	female	male	157.854	276.173	208.562	-0.8075	0.0386809
AXIN1	female	male	285.942	501.357	378.263	-0.809474	0.0499273
TPR	female	male	543.412	952.957	718.931	-0.810477	0.0164095
TSC22D2	female	male	264.798	465.041	350.616	-0.811884	0.0253142
CDH5	female	male	464.321	817.17	615.542	-0.815459	0.0287466
PLXNB2	female	male	1538.24	2708.06	2039.59	-0.815805	0.00252741
PKD1	female	male	239.709	422.719	318.142	-0.819148	0.00518231
DIP2B	female	male	513.911	907.353	682.529	-0.820593	0.0309432
ZNFX1	female	male	452.451	799.752	601.294	-0.822009	0.00425563
UBN1	female	male	544.892	963.867	724.453	-0.822496	0.0232529
ZFR	female	male	426.65	755.343	567.518	-0.823817	0.0433302
CMLKR1	female	male	134.197	237.823	178.608	-0.825234	0.0399796
C1GALT1	female	male	495.817	879.315	660.174	-0.826417	0.0201631
WAC	female	male	1364.5	2421.5	1817.5	-0.827602	0.004216
B4GALT3	female	male	158.539	281.679	211.313	-0.827616	0.00531582
DSE	female	male	162.432	288.856	216.613	-0.830182	0.0246466
USP53	female	male	194.719	346.433	259.739	-0.831066	0.0255911
CEP170	female	male	182.034	323.852	242.813	-0.832008	0.0036668
PHLPP1	female	male	216.321	385.111	288.66	-0.83211	0.0370698
ZNF259	female	male	10231.1	18221.7	13655.7	-0.832728	0.0471484
PPP1R15A	female	male	534.143	952.032	713.239	-0.833782	0.0491342
TNRC6C	female	male	142.072	253.277	189.731	-0.834343	0.017442
YIPF2	female	male	206.27	367.869	275.527	-0.83497	0.0397086
REV3L	female	male	284.981	508.365	380.717	-0.83595	0.0157563
RREB1	female	male	419.666	749.194	560.892	-0.836434	0.00717013
XPR1	female	male	327.107	584.72	437.513	-0.836749	0.00624276
TBC1D9	female	male	87.4037	156.549	117.038	-0.837238	0.0463047
THAP5	female	male	379.245	677.991	507.279	-0.837675	0.0292167
SENP2	female	male	319.957	571.761	427.873	-0.838179	0.0230906
DVL3	female	male	328.733	587.952	439.827	-0.838743	0.0387354
PPM1G	female	male	390.9	699.917	523.336	-0.840269	0.0382521
EIF5A	female	male	1762.93	3157.69	2360.68	-0.840843	0.0208961
MBNL2	female	male	1083.7	1943.13	1452.03	-0.842238	0.0159575
ANKRD11	female	male	1054.13	1890.62	1412.63	-0.842721	0.0100531
MSN	female	male	579.06	1039.31	776.31	-0.844088	0.0054635
CHD4	female	male	1500.87	2697.95	2013.91	-0.846078	0.0238783
PRELID2	female	male	248.963	447.748	334.157	-0.846712	0.00270348
MAP4K4	female	male	391.801	704.306	525.732	-0.847151	0.00490629
TRIOBP	female	male	147.016	264.643	197.427	-0.848152	0.0422058
RBPJ	female	male	232.374	418.89	312.309	-0.84944	0.0142448
MXI1	female	male	132.184	238.11	177.581	-0.849639	0.0155473
KIF13B	female	male	993.767	1791.08	1335.47	-0.850112	0.0186176
ITPR2	female	male	672.832	1213.28	904.451	-0.850472	0.0077847
ERC1	female	male	403.277	728.259	542.555	-0.853212	0.0105087
TPP1	female	male	951.156	1721.13	1281.15	-0.855678	0.00464922
CHSY1	female	male	95.5072	173.194	128.801	-0.857421	0.00641427
PTBP3	female	male	707.761	1282.6	954.119	-0.857688	0.00181577
EXTL2	female	male	116.714	211.658	157.404	-0.858089	0.0406527
SLC23A2	female	male	1407.64	2553	1898.51	-0.859095	0.00590421
PABPC1	female	male	3329.63	6061.63	4500.49	-0.864278	0.00717013
ITPRIP	female	male	99.9205	181.675	134.958	-0.865812	0.0490563
PPM1D	female	male	177.856	324.186	240.569	-0.865905	0.0475228
R3HDM1	female	male	317.837	579.72	430.073	-0.867208	0.00843924
FOXO3	female	male	561.437	1024.4	759.849	-0.867813	0.000791024
NCOR2	female	male	895.695	1637.94	1213.8	-0.870795	0.00157202
CHERP	female	male	188.292	344.416	255.202	-0.870974	0.0121554
RAB30	female	male	527.963	967.217	716.215	-0.872708	0.0268568
REL	female	male	238.218	436.777	323.315	-0.87439	0.0111009
WSCD2	female	male	80.7189	148.135	109.611	-0.875335	0.0360574
RORA	female	male	415.268	761.539	563.67	-0.875703	0.00648884
INO80	female	male	228.507	419.583	310.397	-0.877095	0.0152919
ANGPTL4	female	male	1013.38	1863.54	1377.74	-0.878594	0.00642027
SERPING1	female	male	24730.1	45473.3	33620.1	-0.87874	0.00189879
TOB2	female	male	1338.98	2462.97	1820.69	-0.879433	0.0152655
LRP10	female	male	742.947	1368.82	1011.18	-0.881719	0.0054176
BCOR	female	male	142.608	262.81	194.123	-0.882078	0.0418268
SREBF2	female	male	1081.2	1993.64	1472.24	-0.882723	0.0296693
POGZ	female	male	75.3399	139.178	102.699	-0.883533	0.0316714
PTPN23	female	male	242.098	446.73	329.798	-0.884592	0.00827844
ZEB2	female	male	209.699	387.122	285.738	-0.885137	0.0307701
ARID2	female	male	181.608	335.568	247.591	-0.886543	0.00407448
AOX2	female	male	101.423	187.354	138.251	-0.887272	0.0303351
TP53INP2	female	male	394.699	729.841	538.331	-0.887432	0.00258842
SLC6A8	female	male	108.747	201.379	148.446	-0.887505	0.0227538
AKAP13	female	male	1029.51	1905.67	1405.01	-0.88832	0.0133361
ABCB4	female	male	3124.78	5784.93	4264.84	-0.888608	0.0206322
FOXO1	female	male	585.197	1083.15	798.606	-0.888936	0.0135029
ATP2C1	female	male	750.173	1389.52	1024.18	-0.889127	0.0124635
PUM1	female	male	677.217	1254.85	924.773	-0.889911	0.00323452
NCOA6	female	male	427.016	792.664	583.722	-0.893421	0.00568692
CEP170B	female	male	291.499	542.302	398.986	-0.895397	0.0320498
ANKRD17	female	male	797.844	1483.9	1091.87	-0.895557	0.00868463
INTS1	female	male	620.057	1154.33	849.032	-0.896164	0.00188367
TRAPPC12	female	male	431.839	804.002	591.337	-0.896716	0.0285884
PTPRJ	female	male	338.012	629.454	462.916	-0.896961	0.00264535
SNX29	female	male	241.221	449.534	330.498	-0.897698	0.00067484
UBR4	female	male	1740.94	3243.77	2385.01	-0.897961	0.00843924
NF1	female	male	433.469	808.099	594.025	-0.898101	0.024729
KIF16B	female	male	247.347	461.246	339.018	-0.898545	0.00425563
TGFBR2	female	male	255.453	475.788	349.882	-0.898634	0.0191921
SMAD1	female	male	188.943	352.033	258.839	-0.898713	0.0124731
MBP	female	male	151.45	282.514	207.62	-0.898836	0.0478263
CLMN	female	male	549.403	1024.51	753.021	-0.899255	0.00171498
SLC31A2	female	male	183.404	342.776	251.706	-0.90069	0.00555887
NFE2L2	female	male	251.052	468.983	344.451	-0.900937	0.0266974
TMEM259	female	male	1629.82	3044.54	2236.12	-0.901432	0.00110973
PRKCD	female	male	189.666	354.25	260.202	-0.903373	0.0114091
EMSY	female	male	105.695	197.822	145.178	-0.905724	0.00332432
RC3H2	female	male	448.381	839.995	616.216	-0.905801	0.00133012
APC	female	male	549.155	1029.36	754.957	-0.906214	0.00809303
INPP5D	female	male	117.576	220.716	161.779	-0.9083	0.0163729
IFNAR1	female	male	1498.25	2812.84	2061.65	-0.908784	0.0187511
SIN3A	female	male	382.296	719.242	526.701	-0.911634	0.00430494
FAM135A	female	male	146.001	274.799	201.2	-0.91235	0.0239263
IL13RA1	female	male	1255.88	2368.13	1732.56	-0.915064	0.0475072
ATN1	female	male	362.079	683.632	499.888	-0.916258	0.00671947
CCNYL1	female	male	84.0988	159.04	116.217	-0.916354	0.0131523
CMIP	female	male	206.404	389.851	285.024	-0.917324	0.0199154
CLUH	female	male	2169.15	4098.39	2995.97	-0.918053	0.00153336
RPS6KA3	female	male	248.638	469.8	343.422	-0.918494	0.0138875
MYH9	female	male	2686.17	5077.39	3710.98	-0.918575	0.00528284
NIN	female	male	95.159	179.816	131.441	-0.920817	0.0416979
LNX2	female	male	819.185	1551.01	1132.82	-0.921034	0.0462489
ATG2A	female	male	929.212	1761.93	1286.09	-0.923068	0.0417885
SSH2	female	male	364.644	691.397	504.681	-0.924429	0.00357062
TMEM184B	female	male	211.511	401.618	292.985	-0.92457	0.0016876
SMAP2	female	male	746.947	1423.36	1036.84	-0.930264	6.40381e-05
SLC16A10	female	male	1483.54	2827.34	2059.46	-0.930685	0.00857204
GAS7	female	male	47.0519	89.6731	65.3181	-0.930733	0.0255559
IRS2	female	male	751.098	1432.56	1043.15	-0.931652	0.0153598
SH3GL1	female	male	265.248	507.652	369.136	-0.93656	0.0226295
SLC38A1	female	male	1759.5	3373.18	2451.08	-0.938905	0.0389581
C4A	female	male	70668.4	135482	98445.8	-0.938967	0.00903266
ZNF689	female	male	116.372	223.622	162.336	-0.941288	0.00433254
DYNLL2	female	male	776.828	1492.99	1083.76	-0.942243	0.00685182
SUPT6H	female	male	797.008	1531.44	1111.76	-0.942414	0.00954222
SLC39A1	female	male	875.361	1684.38	1222.09	-0.944209	0.0290601
HMGXB3	female	male	149.843	288.986	209.476	-0.94801	0.0140999
TNRC18	female	male	543.822	1048.91	760.289	-0.948071	0.000196161
POR	female	male	3735.1	7215.59	5226.74	-0.950047	0.015356
ELL2	female	male	1465.06	2830.57	2050.28	-0.950156	0.000834065
PRDM4	female	male	230.941	446.19	323.19	-0.950631	0.00703575
RIN3	female	male	482.313	933.268	675.579	-0.952195	0.00133876
RBPMS2	female	male	476.968	923.702	668.425	-0.953399	0.035064
MICAL2	female	male	598.773	1161.41	839.904	-0.956389	0.0119796
HMGA1	female	male	138.274	269.393	194.468	-0.960013	0.000927389
MT-ND1	female	male	2571.29	5003.82	3613.8	-0.960567	0.00914708
CIC	female	male	481.336	937.628	676.889	-0.961772	0.00928096
SAP130	female	male	253.75	493.862	356.655	-0.962103	0.00189095
HMOX1	female	male	857.568	1675.99	1208.32	-0.966814	0.000823197
FOLR2	female	male	380.485	744.277	536.396	-0.967816	0.00259174
POMGNT2	female	male	96.2911	188.585	135.846	-0.968129	0.0292256
FOXK2	female	male	309.477	606.316	436.694	-0.969674	0.0250907
SERPINB10	female	male	72.7073	142.283	102.526	-0.970154	0.0369283
NKIRAS2	female	male	257.639	505.145	363.713	-0.971086	0.0303124
MYH14	female	male	1456.64	2856.15	2056.43	-0.971423	0.00726434
TMCC3	female	male	185.098	363.393	261.51	-0.972929	0.0171512
SUCO	female	male	158.729	312.033	224.431	-0.974632	0.0404753
PTPN1	female	male	73.0229	143.2	103.099	-0.976005	0.0145382
UBALD1	female	male	231.365	455.211	327.299	-0.976028	0.0246568
MAP3K5	female	male	278.656	548.932	394.489	-0.97736	0.0193616
ZBTB10	female	male	160.461	316.849	227.485	-0.98124	0.0462489
DHX33	female	male	184.995	365.817	262.49	-0.983879	0.0299114
THRB	female	male	210.591	417.28	299.172	-0.986428	0.00344425
TJP1	female	male	324.713	643.482	461.329	-0.987665	0.00011877
DENND1A	female	male	174.589	346.93	248.449	-0.99117	0.033959
PEDS1	female	male	103.228	205.434	147.031	-0.992125	0.0120179
ZDHHC5	female	male	255.863	509.107	364.396	-0.992292	0.00728298
ZZEF1	female	male	435.359	866.582	620.169	-0.993456	0.00164978
TULP4	female	male	313.398	628.81	448.574	-1.005	0.00286342
SULF2	female	male	1184.55	2379.03	1696.47	-1.00634	0.0356557
JAK2	female	male	267.615	537.477	383.27	-1.00657	0.00846155
NUP153	female	male	343.549	692.707	493.188	-1.01186	0.00319103
ZNF592	female	male	478.035	964.731	686.619	-1.01315	0.00201372
WWC3	female	male	298.715	602.493	428.906	-1.0133	0.000281855
CDYL	female	male	105.617	212.977	151.628	-1.0136	0.0112352
DNAH2	female	male	354.702	716.866	509.915	-1.01597	0.0032326
TMEM97	female	male	457.994	926.183	658.647	-1.01615	0.000508652
KBTBD2	female	male	138.681	280.674	199.535	-1.01783	0.0248973
ANKRD28	female	male	266.727	540.306	383.975	-1.01799	0.0204821
BCR	female	male	294.293	596.853	423.961	-1.01941	0.000202667
SOX6	female	male	103.983	211.068	149.877	-1.02136	0.0031857
UBAP2	female	male	134.281	272.692	193.6	-1.02231	0.00111534
AFF4	female	male	317.625	646.45	458.55	-1.02552	0.0348015
TJP2	female	male	931.374	1897.23	1345.31	-1.02677	9.82765e-05
NOTCH2	female	male	615.994	1256.85	890.646	-1.02853	0.00467659
PLBD2	female	male	1932.91	3942.95	2794.36	-1.02857	0.00110308
TMEM63B	female	male	317.493	647.459	458.907	-1.02902	0.00118356
RASAL2	female	male	89.4518	182.704	129.417	-1.0303	0.0250611
TBL1X	female	male	491.287	1003.74	710.91	-1.03056	0.00357876
MITF	female	male	122.288	249.877	176.969	-1.03267	0.000791024
TTGN1	female	male	865.653	1771.94	1254.06	-1.03337	0.0187507
PZP	female	male	29413.2	60244.2	42626.5	-1.03437	0.00111255
ERRFI1	female	male	3161.76	6476.13	4582.2	-1.03448	0.00144989
TNFAIP2	female	male	98.9688	203.323	143.692	-1.03784	0.0426404
PREX1	female	male	109.299	224.785	158.793	-1.03828	0.0192505
SYNDIG1L	female	male	63.054	129.182	91.3944	-1.03891	0.0353429
ARID1B	female	male	330.149	679.521	479.88	-1.04151	9.24565e-05
RAPGEF2	female	male	473.617	974.554	688.304	-1.04155	0.000611677
INPP5F	female	male	860.304	1773.24	1251.56	-1.04339	0.00538851
USP54	female	male	187.025	385.463	272.07	-1.04413	0.0437742
FLOT2	female	male	584.258	1205.89	850.672	-1.04511	0.0377258
RANBP2	female	male	1566.45	3235.35	2281.7	-1.04645	0.00472924
KLHL15	female	male	132.379	273.422	192.826	-1.04752	0.00445988
HELZ2	female	male	278.991	576.649	406.559	-1.04789	0.00580535
CAMSAP2	female	male	191.332	396.031	279.06	-1.04929	0.000193186
ELMO1	female	male	41.1998	85.2456	60.0766	-1.05027	0.0356566
PROX1	female	male	1409.45	2920.71	2057.13	-1.05127	0.00516974
DENND4A	female	male	341.511	707.922	498.544	-1.05241	0.00108647
SESN3	female	male	247.262	512.983	361.142	-1.05378	0.0207514
MVP	female	male	691.096	1436.14	1010.4	-1.05492	0.0120801
UBTD1	female	male	311.454	647.395	455.428	-1.05646	0.00265471
RNF44	female	male	133.621	278.934	195.898	-1.06084	0.0350058
CYBB	female	male	184.491	385.546	270.658	-1.06235	0.00102248
SCAF4	female	male	164.689	344.401	241.709	-1.06362	0.00345516
JCAD	female	male	74.1849	155.068	108.849	-1.06447	0.0205411
TCF20	female	male	315.328	661.322	463.611	-1.06809	0.00648884
PSKH1	female	male	141.244	296.5	207.783	-1.06979	0.0424176
AP2A1	female	male	797.778	1677.12	1174.64	-1.07193	0.00249635
NFIX	female	male	177.464	373.246	261.371	-1.07196	0.0464794
SETD7	female	male	159.359	335.436	234.821	-1.07446	0.00469893
PML	female	male	193.512	408.693	285.733	-1.07774	0.00779589
NFKBIA	female	male	857.29	1809.79	1265.5	-1.07817	0.0107441
CSF1R	female	male	701.921	1483.06	1036.69	-1.07902	5.77705e-05
NUP98	female	male	509.601	1077.35	752.921	-1.08017	0.00223015
HIPK3	female	male	1501.81	3186.09	2223.65	-1.08506	0.0207658
ATF7IP	female	male	147.186	311.914	217.784	-1.08533	0.048009
LPIN3	female	male	73.8593	156.498	109.276	-1.08568	0.0370698
TGFBR3	female	male	232.483	493.465	344.333	-1.08719	2.28309e-05
DTX2	female	male	101.72	216.513	150.917	-1.08912	0.000376933
UBD	female	male	210.797	448.961	312.867	-1.09063	0.0279272
MIDN	female	male	452.777	964.334	672.016	-1.09077	0.0206697
AMPD2	female	male	218.521	465.665	324.44	-1.09133	0.00409292
WDR1	female	male	750.936	1600.66	1115.1	-1.0919	0.00820138
EP300	female	male	604.209	1288.4	897.433	-1.09284	0.000247975
GIT1	female	male	195.044	416.538	289.97	-1.09358	0.000289855
MED13L	female	male	838.41	1789.14	1245.87	-1.09385	0.0233233
RC3H1	female	male	473.113	1009.89	703.159	-1.09441	1.50874e-05
CYP2E1	female	male	14726.7	31461.7	21898.8	-1.09519	0.00363706
TNFRSF1A	female	male	313.894	670.72	466.819	-1.09522	0.0338492
TPM4	female	male	503.815	1078.04	749.911	-1.09777	0.00491169
HIPK1	female	male	987.792	2114.59	1470.71	-1.09796	0.000518146
NFAM1	female	male	44.539	96.154	66.6597	-1.10514	0.0465917
GAB2	female	male	39.8173	85.8773	59.5573	-1.11071	0.0110275
ELF1	female	male	350.801	758.945	525.72	-1.11326	0.00490629
EPB41	female	male	234.595	507.542	351.572	-1.11335	0.0272722
TADA2B	female	male	86.1045	186.483	129.124	-1.11376	0.00767008
CXCL16	female	male	130.219	283.129	195.752	-1.11848	0.0204082
ARHGAP35	female	male	1170.53	2546.2	1760.1	-1.12109	0.00182258
COLGALT2	female	male	82.0411	178.479	123.371	-1.12329	0.0326722
HUWE1	female	male	2053.77	4475.65	3091.72	-1.12392	0.000953556
USP32	female	male	487.457	1064.8	734.888	-1.12771	0.00311135
SRF	female	male	83.887	183.881	126.741	-1.12965	0.00581741
SIK3	female	male	328.482	719.262	495.959	-1.13137	0.000263941
ZSWIM4	female	male	62.0504	136.069	93.7727	-1.13188	0.0166671
PTPRE	female	male	38.8062	85.3139	58.7381	-1.13439	0.0212979
GATAD2A	female	male	664.251	1459.48	1005.07	-1.13559	8.46698e-05
PTP4A1	female	male	4760.92	10463.4	7204.84	-1.136	0.0345164
RHOB	female	male	857.158	1884.13	1297.29	-1.1363	0.0226556
MAP1B	female	male	85.5867	188.274	129.596	-1.13638	0.0392387
STX2	female	male	346.8	763.649	525.449	-1.13869	0.0114254
NFIC	female	male	708.16	1561.89	1074.04	-1.14135	0.00434429
NOS3	female	male	133.395	295.583	202.904	-1.14729	0.0232296
KIF21A	female	male	613.652	1362.31	934.504	-1.15071	0.00284241
NCOA2	female	male	812.01	1804.42	1237.33	-1.15184	0.000171372
WNK1	female	male	581.721	1293.26	886.667	-1.1528	0.00779418
MEX3D	female	male	133.154	296.514	203.166	-1.15613	0.000539148
CCDC6	female	male	83.6867	186.529	127.762	-1.15899	0.0250462
MYO9B	female	male	508.738	1136.29	777.689	-1.16004	0.00010325
SGMS2	female	male	41.7029	93.1628	63.7571	-1.16074	0.00717013
CSF2RA	female	male	44.9188	100.745	68.8441	-1.16222	0.0456644
TAB2	female	male	835.532	1875.7	1281.32	-1.16657	0.000247975
SBNO2	female	male	237.356	533.269	364.176	-1.16726	0.00960235
SLC38A2	female	male	3461.8	7781.46	5313.08	-1.16852	0.0274901
SPRY4	female	male	103.081	232.079	158.366	-1.16894	0.0223828
SIK2	female	male	211.286	475.414	324.483	-1.16977	0.00693691
ELF4	female	male	234.424	527.721	360.122	-1.17094	0.00464922
CEMIP2	female	male	265.639	600.053	408.959	-1.17535	0.0386809
ZNF609	female	male	176.699	399.046	271.991	-1.17656	0.0184239
DOT1L	female	male	177.177	401.521	273.325	-1.18127	0.00159094
ATP2B1	female	male	211.696	480.087	326.721	-1.18148	0.000483765
FAM102B	female	male	51.7281	117.684	79.9948	-1.18361	0.00208404
EPAS1	female	male	3856.04	8801.14	5975.37	-1.19053	0.00202076
WNT2	female	male	99.8042	228.479	154.95	-1.19451	0.0232296
APOD	female	male	34.4879	79.1549	53.6309	-1.19559	0.0418079
ZRANB1	female	male	250.109	573.024	388.501	-1.19664	0.00385125
ADGRE5	female	male	168.92	387.723	262.693	-1.19817	0.00191914
STAT3	female	male	2128.43	4884.37	3309.54	-1.19832	0.0293267
S1PR2	female	male	143.005	328.782	222.624	-1.20022	0.0153598
CPEB4	female	male	1298.32	2983.03	2020.34	-1.20024	0.00764675
SAMHD1	female	male	180.092	415.423	280.948	-1.20397	0.00573474
MAPK1IP1L	female	male	261.132	603.227	407.744	-1.20705	0.000186855
PLEKHG1	female	male	69.8016	160.614	108.721	-1.2072	0.0332447
PPFIBP1	female	male	464.533	1077.67	727.305	-1.21406	0.00074681
DUSP8	female	male	280.285	651.093	439.203	-1.21555	0.00181108
MYO1D	female	male	420.328	977.558	659.14	-1.21754	0.0248973
RNF19B	female	male	389.673	906.581	611.205	-1.21831	0.00395014
TXNRD1	female	male	1528.76	3558.73	2398.75	-1.21902	0.0222528
BCL9L	female	male	323.637	753.832	508.006	-1.22047	0.00236387
RNASEK	female	male	275.258	642.199	432.518	-1.2227	4.59246e-06
DUSP1	female	male	472.541	1105.55	743.83	-1.22649	0.0134274
HDAC4	female	male	111.876	261.984	176.208	-1.22674	0.0364278
HIPK2	female	male	1247.86	2925.6	1966.89	-1.22939	8.45964e-09
SLC16A1	female	male	1635.95	3843.75	2582.15	-1.23228	0.00104143
ARNTL	female	male	68.1203	159.825	107.423	-1.2328	0.0249767
ARL5B	female	male	716.839	1685.06	1131.79	-1.23282	0.0148721
SDC3	female	male	232.65	547.414	367.549	-1.23538	0.000545854
TGIF2	female	male	37.4087	88.1734	59.165	-1.23872	0.0320395
PXYLP1	female	male	405.367	957.355	641.933	-1.23921	0.00333269
ATG14	female	male	64.5913	152.621	102.318	-1.24014	0.0415287
LRP1	female	male	15049.3	35551.7	23836.1	-1.24022	0.0119796
RAD54L2	female	male	49.0051	115.733	77.6028	-1.24061	0.0074457
IL6ST	female	male	2191.15	5179.74	3471.98	-1.24126	1.86965e-05
EREG	female	male	102.124	241.7	161.942	-1.24202	0.00642027
CYP2A13	female	male	14162.4	33509	22453.8	-1.24251	0.0277208
STK40	female	male	836.073	1984.73	1328.35	-1.24706	0.028876
MYH10	female	male	384.456	914.474	611.606	-1.25051	0.00507528
TNFAIP1	female	male	107.811	256.959	171.732	-1.2514	0.0396829
BCL9	female	male	101.35	241.944	161.605	-1.25241	0.00480874
SLC41A1	female	male	305.954	729.351	487.41	-1.25318	0.000306262
CREBBP	female	male	550.893	1314.9	878.323	-1.25569	0.000530434
PPP1R10	female	male	292.763	702.046	468.17	-1.26089	0.0314061
PLEKHM2	female	male	695.958	1670.41	1113.58	-1.26302	1.53617e-05
BRPF3	female	male	788.57	1898.33	1264.18	-1.26741	0.000548609
GOT1	female	male	6206.45	14977.3	9965.38	-1.27099	0.0268568
ZFP36L1	female	male	986.487	2394.18	1589.78	-1.27901	0.00471727
CEP76	female	male	47.196	115.144	76.3167	-1.28213	0.00739794
ATXN7	female	male	336.449	819.45	543.449	-1.28518	6.85253e-08
TNFRSF1B	female	male	715.512	1757.17	1161.94	-1.29616	0.0244156
PPARD	female	male	51.2373	126.355	83.4306	-1.3019	0.007921
NFATC3	female	male	137.985	340.871	224.936	-1.30437	0.00151966
SAMD4B	female	male	183.762	455.022	300.016	-1.30808	0.000585895
TOB1	female	male	255.953	634.514	418.193	-1.31026	1.35109e-05
ZFHX4	female	male	27.0147	67.0944	44.1917	-1.3141	0.0130266
CTNNA3	female	male	15.7927	39.5195	25.9613	-1.31743	0.0307568
IL1R1	female	male	911.762	2287.57	1501.4	-1.32696	0.00766193
MT-ND2	female	male	10143.2	25449.3	16703	-1.32712	2.32517e-06
EGR2	female	male	24.1632	60.9725	39.9386	-1.32881	0.0252432
UBE2Z	female	male	128.672	323.579	212.204	-1.33051	0.00923696
FLVCR1	female	male	99.1045	249.904	163.733	-1.33402	0.0386767
SNTB1	female	male	401.002	1014.87	664.089	-1.33957	1.06874e-06
RASSF1	female	male	155.044	392.906	256.985	-1.34094	0.048009
MAN1A1	female	male	1735.13	4399.67	2877.08	-1.34231	0.00326078
ZNF275	female	male	110.96	282.607	184.523	-1.3487	0.00700021
CDKN1A	female	male	156.343	401.098	261.238	-1.35816	0.0166671
GK5	female	male	423.378	1085.3	707.059	-1.35868	0.000391398
SVEP1	female	male	26.7119	69.1795	44.9123	-1.37096	0.00530779
S100B	female	male	30.0598	78.2147	50.6976	-1.37372	0.0398412
F13A1	female	male	29.875	77.9356	50.4724	-1.37602	0.0392387
SMG7	female	male	204.254	536.162	346.5	-1.39189	0.00108647
PPRC1	female	male	136.734	359.808	232.337	-1.39467	0.0334024
DEPP1	female	male	33.745	88.805	57.3421	-1.39494	0.0354655
MT2	female	male	14258.8	37519.8	24227.8	-1.39579	9.09979e-05
LIMD1	female	male	67.0059	176.18	113.795	-1.39619	0.00584074
SDC1	female	male	1301.53	3436.73	2216.62	-1.40075	0.00164978
SLC30A7	female	male	115.657	306.374	197.393	-1.40424	0.0266974
DAPK1	female	male	259.687	701.59	449.074	-1.4336	0.00189918
PDE4B	female	male	305.208	827.595	529.088	-1.43954	0.0166776
MAP1A	female	male	43.0496	117.134	74.7998	-1.44437	0.0149201
LEPR	female	male	3778.7	10291.9	6570.06	-1.44557	0.00960235
EGLN3	female	male	158.84	432.473	276.111	-1.44649	0.000222003
CAPN2	female	male	280.927	773.673	492.103	-1.46231	0.0207658
CADM3	female	male	196.061	541.405	344.065	-1.46564	3.29625e-05
ARHGAP1	female	male	439.548	1216.3	772.44	-1.46816	0.0130266
WSB1	female	male	1141.46	3190.37	2019.57	-1.48312	0.00201372
NEDD9	female	male	167.928	470.642	297.662	-1.48585	0.0226056
CSF3R	female	male	22.7317	64.0877	40.4557	-1.48637	0.00387366
SNAP25	female	male	29.1467	81.7305	51.6826	-1.48772	0.0277459
TRIB1	female	male	459.334	1289.24	815.008	-1.48867	0.0316798
IER5L	female	male	24.9917	70.128	44.3358	-1.49018	0.00934261
TGFA	female	male	30.3998	85.3128	53.9339	-1.4921	0.0123584
TTC39B	female	male	31.2272	88.6163	55.8226	-1.50519	0.00311135
OLFML2B	female	male	17.4259	49.619	31.2229	-1.50957	0.0415287
CBL	female	male	35.904	102.81	64.5781	-1.51523	0.000272421
ACTG1	female	male	912.651	2609.82	1640.01	-1.51582	0.00214793
TNRC6B	female	male	145.708	416.786	261.884	-1.51746	0.000445602
UNKL	female	male	116.042	332.339	208.741	-1.51857	0.0283539
SERPINA12	female	male	13.2619	38.1031	23.9081	-1.52209	0.0354103
PRKAG3	female	male	139.876	401.844	252.148	-1.52313	0.0134274
CCR2	female	male	39.9235	114.443	71.8605	-1.52424	0.000283414
CAMKMT	female	male	44.7518	128.768	80.7585	-1.52509	0.012197
MED22	female	male	21.7277	63.0202	39.4245	-1.53014	0.00717013
ZCCHC14	female	male	67.9511	196.207	122.918	-1.53295	0.000499273
OASL	female	male	55.8536	161.696	101.215	-1.53642	0.00586152
FGR	female	male	26.5864	78.9083	49.0101	-1.56629	0.0187507
VCAM1	female	male	608.151	1802.18	1119.88	-1.5673	0.00711952
SUSD2	female	male	106.141	314.404	195.396	-1.56888	0.0486808
DUSP6	female	male	407.239	1208.57	750.665	-1.56899	0.00311135
JUN	female	male	148.568	451.513	278.401	-1.60322	0.00971652
FAM107B	female	male	1560.39	4778.13	2939.42	-1.61453	0.00206746
SLC39A14	female	male	5725.83	17552.9	10794.6	-1.61615	0.0185425
ZFHX3	female	male	105.698	326.39	200.28	-1.62748	2.82701e-05
KLF6	female	male	308.088	953.359	584.633	-1.62986	0.001906
POM121C	female	male	122.769	383.464	234.495	-1.64334	1.71461e-05
LTF	female	male	103.457	323.598	197.803	-1.64394	0.0300126
MAST4	female	male	75.0642	234.227	143.277	-1.64584	0.000809539
PAQR7	female	male	300.969	943.282	576.246	-1.64795	0.0244028
ABCA1	female	male	1357.72	4279.28	2609.82	-1.65621	0.00116716
STX11	female	male	14.6315	46.5208	28.2984	-1.66037	0.034805
RBM38	female	male	51.3268	163.144	99.2484	-1.66678	0.00852091
TDRD12	female	male	17.4747	56.8209	34.3374	-1.69153	0.0213863
CALHM6	female	male	79.9464	259.302	156.813	-1.6961	0.0290787
ART2	female	male	20.7012	67.759	40.8688	-1.71072	0.0296693
STX1B	female	male	15.7457	51.5398	31.086	-1.72195	0.0441592
SHB	female	male	360.987	1195.12	718.474	-1.72723	0.010513
UBE2QL1	female	male	74.7216	247.375	148.716	-1.72731	0.00980395
CREM	female	male	304.947	1013.29	608.525	-1.73236	0.0015072
XPO6	female	male	939.608	3123.7	1875.65	-1.73305	0.0140999
NFKB2	female	male	98.2842	330.86	197.96	-1.75102	0.00707162
FAIM2	female	male	15.8433	53.4991	31.9815	-1.75626	0.0138097
RND3	female	male	168.188	575.035	342.551	-1.77288	0.00173615
PSD3	female	male	802.972	2769.44	1645.75	-1.7863	0.000103192
FOSL2	female	male	113.239	396.439	234.61	-1.80713	2.63903e-05
KLF4	female	male	48.3995	171.205	101.03	-1.82404	0.00043839
PLXNA4	female	male	502.666	1783.05	1051.4	-1.82688	1.59954e-05
ACER2	female	male	1204.67	4276.64	2521.23	-1.82804	0.000146138
MTSS1	female	male	635.5	2265.32	1333.99	-1.83379	0.00181511
KIF5C	female	male	32.0098	114.347	67.2972	-1.83758	0.00437182
ARL4D	female	male	54.876	198.195	116.298	-1.85262	0.0161344
ETS2	female	male	664.361	2409.29	1412.19	-1.85849	0.00507528
TMEM101	female	male	179.149	650.617	381.207	-1.85987	0.00345403
PLAAT4	female	male	28.6417	104.25	61.0454	-1.86403	0.014758
PLCE1	female	male	207.949	760.306	444.673	-1.87025	4.40448e-06
ABL1	female	male	401.322	1471.71	860.062	-1.87439	9.77498e-08
ZFP36	female	male	331.482	1222.67	713.421	-1.88284	0.00463121
DUSP5	female	male	61.9834	230.413	134.167	-1.89296	0.0334782
SLC16A7	female	male	859.025	3239.1	1879.06	-1.91495	0.00014161
SEMA6A	female	male	128.403	485.799	281.573	-1.92062	5.04923e-08
RELB	female	male	43.9507	167.073	96.7174	-1.92757	0.0163406
HIVEP2	female	male	65.803	250.423	144.926	-1.92945	0.00192296
SESN2	female	male	42.2549	161.749	93.4667	-1.93413	7.62125e-05
GLIS3	female	male	124.189	477.342	275.54	-1.94303	0.000480973
SLC25A25	female	male	497.15	1914.19	1104.45	-1.94532	0.00573474
EGFR	female	male	236.288	926.998	532.307	-1.97323	9.4268e-05
PLIN2	female	male	1950.62	7752.79	4437.26	-1.99074	0.00283172
SOCS3	female	male	42.8721	174.225	99.1661	-2.02167	0.00973017
AGBL3	female	male	133.811	578.6	324.435	-2.11271	0.000919793
LY75	female	male	71.0148	312.388	174.46	-2.13685	2.50735e-07
DDIT4	female	male	338.529	1519.3	844.573	-2.16656	9.24565e-05
NTN1	female	male	199.463	900.2	499.779	-2.17495	1.78435e-08
NR4A1	female	male	22.1113	101.913	56.3122	-2.20663	0.00808154
SLC7A1	female	male	70.2562	327.708	180.593	-2.22262	0.0083134
RFLNB	female	male	13.2882	61.877	34.112	-2.22976	0.00490629
FST	female	male	136.115	662.708	361.798	-2.2841	0.00314092
ANK3	female	male	752.496	3763.27	2042.83	-2.32233	7.06958e-06
LOX	female	male	154.248	790.921	427.108	-2.35961	0.00102212
AMIGO2	female	male	13.7713	76.5844	40.6912	-2.4782	0.0252245
ADAMTS9	female	male	35.3941	200.236	106.041	-2.50002	1.50874e-05
C2CD4A	female	male	37.6136	215.912	114.027	-2.52329	0.00469893
CDHR5	female	male	32.8525	194.873	102.29	-2.5663	0.00178812
THOC6	female	male	163.791	982.588	514.704	-2.58441	0.0455869
MT-ND6	female	male	72.3226	468.917	242.292	-2.69707	2.93057e-21
GADD45G	female	male	126.456	848.244	435.793	-2.74615	0.0283539
VNN3	female	male	1842.88	12753.2	6518.75	-2.7909	0.00700021
SDC4	female	male	893.693	6322.4	3220.28	-2.8226	1.52871e-06
MCM10	female	male	35.703	262.658	132.97	-2.88474	0.00011877
NPAS2	female	male	40.1419	306.351	154.231	-2.93852	1.59954e-05
STEAP4	female	male	905.379	7253.04	3625.8	-3.00202	0.0190028
MT-ND4	female	male	120.8	968.903	484.273	-3.00208	2.43799e-28
IGHV1-18	female	male	16.3882	134.673	67.0817	-3.04219	0.0499273
TAR1	female	male	49.9726	418.47	207.9	-3.06447	7.92777e-18
EGR1	female	male	44.9541	377.575	187.506	-3.06701	3.17052e-05
CXCL2	female	male	71.2989	651.417	319.921	-3.19128	0.0449232
ATF3	female	male	24.1914	238.538	116.054	-3.30194	0.0155473
BTG2	female	male	167.474	1916.32	916.977	-3.51629	0.00868274
IGFBP1	female	male	472.312	6084.97	2877.74	-3.68752	0.0301326
IL1RN	female	male	504.815	8578.78	3965.08	-4.08694	1.46182e-05

## Sheet: shared sex-biased genes
			Brain					Liver
Gene name	sampleA	sampleB	baseMeanA	baseMeanB	baseMean	log2FoldChange	padj	baseMeanA	baseMeanB	baseMean	log2FoldChange	padj	Categery
KRTCAP2	female	male	365.539	273.585	326.13	0.418042	0.0349382	624.61	272.311	473.625	1.19828	6.81037e-05	female-biased gene
RPS17	female	male	2672.64	1702.68	2256.94	0.650437	6.74318e-05	3397.1	1488.9	2579.3	1.19022	4.77948e-06	female-biased gene
ATOX1	female	male	228.515	119.176	181.655	0.939002	2.68705e-05	279.652	75.7196	192.252	1.88531	1.33331e-13	female-biased gene
GLT1D1	female	male	823.347	638.763	744.24	0.366205	0.0135246	3644.05	1768.67	2840.32	1.04292	0.000162671	female-biased gene
COX7A2L	female	male	1165.6	802.057	1009.8	0.539267	0.00023003	1550.59	816.171	1235.84	0.925637	0.00409606	female-biased gene
C1ORF53	female	male	135.09	70.491	107.405	0.93856	0.000602518	91.7158	36.838	68.1967	1.31703	0.0032334	female-biased gene
CLK4	female	male	1486.23	999.8	1277.76	0.571996	0.000690776	539.366	288.176	431.713	0.903877	0.034731	female-biased gene
COX5A	female	male	1646.51	1123.45	1422.34	0.551474	0.000140943	2819.01	1398.24	2210.11	1.01143	0.00139068	female-biased gene
SLC25A3	female	male	6088.19	3949.79	5171.73	0.624233	9.21749e-13	4383.66	2300.2	3490.75	0.930293	0.00199624	female-biased gene
CFHR5	female	male	216.029	127.278	177.992	0.763324	0.0415982	98.3361	42.6113	74.454	1.20061	0.0287576	female-biased gene
JPT1	female	male	1421.69	1037.89	1257.2	0.453915	0.000580913	174.982	96.0511	141.154	0.865613	0.0463047	female-biased gene
SUMO1	female	male	2273.74	1216.44	1820.61	0.902403	6.31382e-19	1021.23	591.408	837.022	0.787928	0.00319759	female-biased gene
AMZ2	female	male	324.174	229.238	283.487	0.500047	0.0119599	169.35	89.2501	135.022	0.922351	0.0398222	female-biased gene
CYCS	female	male	2703.07	1664.09	2257.79	0.699824	1.82335e-11	4643.74	2528.69	3737.29	0.876796	0.0103285	female-biased gene
POLR1H	female	male	217.168	142.178	185.029	0.611228	0.00382261	163.456	75.4131	125.724	1.11728	0.00722995	female-biased gene
ZNF783	female	male	595.352	397.67	510.631	0.582133	0.000318169	93.263	47.3189	73.5727	0.975154	0.0292167	female-biased gene
NSMCE4A	female	male	220.895	157.496	193.724	0.488117	0.0332075	576.769	332.92	472.262	0.792551	0.0061645	female-biased gene
BRAWNIN	female	male	139.184	77.2219	112.629	0.849781	0.00400575	110.06	39.6947	79.9035	1.47314	0.00108647	female-biased gene
CCDC12	female	male	1408.7	1113.5	1282.19	0.339229	0.028994	264.56	114.255	200.144	1.21319	0.00770474	female-biased gene
SMDT1	female	male	457.647	298.765	389.555	0.615178	1.15124e-05	390.181	182.485	301.168	1.09704	2.75301e-05	female-biased gene
COX15	female	male	186.462	111.868	154.493	0.73724	0.00217739	181.609	83.0229	139.358	1.12644	0.022442	female-biased gene
PDE1C	female	male	1163.41	950.157	1072.02	0.292057	0.045643	206.909	111.903	166.192	0.888499	0.0157055	female-biased gene
COX6C	female	male	2157.22	998.03	1660.43	1.11201	2.78319e-17	3989.41	1169.53	2780.89	1.77026	5.07004e-11	female-biased gene
ZNF248	female	male	1424.12	1000.59	1242.61	0.509192	8.3323e-05	417.907	219.732	332.975	0.926696	0.00409606	female-biased gene
ZNF181	female	male	269.852	123.793	207.255	1.12434	2.07208e-08	100.128	43.547	75.8791	1.2004	0.00168392	female-biased gene
COX14	female	male	338.912	195.498	277.449	0.793724	2.08081e-05	340.863	131.331	251.063	1.37613	0.00104143	female-biased gene
LYRM2	female	male	399.154	246.915	333.909	0.692822	0.000790051	256.097	110.82	193.835	1.20789	0.00150576	female-biased gene
MRPS14	female	male	360.069	114	254.611	1.65929	2.41284e-25	289.983	54.9242	189.244	2.3995	2.01844e-07	female-biased gene
SFXN2	female	male	157.931	69.5189	120.04	1.18357	1.65955e-05	1089.31	545.812	856.381	0.996674	0.012335	female-biased gene
BLOC1S2	female	male	356.471	230.404	302.442	0.629543	0.00477151	120.603	61.5054	95.2755	0.975745	0.0348015	female-biased gene
SLC25A26	female	male	114.205	65.6065	93.377	0.799879	0.00595133	237.225	90.7666	174.457	1.38639	0.000794282	female-biased gene
USE1	female	male	384.985	283.062	341.303	0.443593	0.00709622	187.544	86.3334	144.168	1.11987	0.00950915	female-biased gene
HNMT	female	male	97.8042	55.1835	79.5382	0.825735	0.0192474	1994.72	784.051	1475.86	1.34709	0.0106576	female-biased gene
TMEM60	female	male	120.554	62.4972	95.6723	0.947724	0.00166707	59.9628	22.064	43.7205	1.44702	0.00286342	female-biased gene
ATP5MG	female	male	2040.91	1252.65	1703.09	0.704209	5.19598e-12	3604.12	854.879	2425.87	2.0758	1.72693e-12	female-biased gene
TMEM18	female	male	695.542	455.411	592.629	0.610982	0.000334131	365.53	141.944	269.707	1.36439	3.23753e-05	female-biased gene
RPL29	female	male	1655.61	924.248	1342.17	0.841008	8.37986e-12	3011.27	1103.01	2193.44	1.44889	9.35512e-12	female-biased gene
COPS9	female	male	1219.83	607.931	957.586	1.00465	3.24522e-08	937.098	267.723	650.223	1.80805	3.40618e-05	female-biased gene
PDCD5	female	male	732.645	419.26	598.337	0.80528	0.000217714	119.247	52.9336	90.8269	1.17077	0.00151145	female-biased gene
RPS23	female	male	2498.28	818.308	1778.29	1.61019	1.72808e-25	4821.18	1172.15	3257.31	2.04041	9.04254e-21	female-biased gene
SNRNP70	female	male	6848.37	5323.69	6194.93	0.363339	0.00551677	3449.98	1736.62	2715.68	0.990333	0.00641224	female-biased gene
CLC	female	male	63.3275	33.6934	50.6271	0.910191	0.0336359	80.7947	18.4079	54.0575	2.127	1.22181e-05	female-biased gene
CFAP46	female	male	204.557	122.308	169.307	0.742104	0.000520447	669.015	164.614	452.843	2.02353	0.000829918	female-biased gene
CCDC39	female	male	963.374	536.982	780.634	0.843257	5.05254e-05	245.183	126.313	194.239	0.958883	0.0367583	female-biased gene
NEIL1	female	male	1859.26	1524.69	1715.87	0.286227	0.0293898	1178.45	579.429	921.727	1.02428	0.000806341	female-biased gene
ATP5MC1	female	male	1188.21	624.724	946.716	0.927469	6.62213e-10	3184.18	1012.24	2253.35	1.65317	2.13523e-09	female-biased gene
MRPL52	female	male	241.15	141.284	198.35	0.771339	0.00597723	338.944	90.793	232.594	1.90096	3.57086e-07	female-biased gene
SPTSSA	female	male	334.68	196.727	275.557	0.766547	8.39744e-07	674.733	398.978	556.553	0.75759	0.0210858	female-biased gene
BORCS7	female	male	1675.66	1116.43	1435.99	0.585813	7.11255e-06	399.091	177.99	304.333	1.16447	9.24565e-05	female-biased gene
MRPL19	female	male	252.414	154.463	210.435	0.708412	0.00105868	278.789	126.48	213.514	1.14037	0.00508743	female-biased gene
KLHL23	female	male	1846.56	1472.01	1686.04	0.327076	0.0132264	1671.01	835.231	1312.82	1.00067	3.76546e-06	female-biased gene
PSMC2	female	male	1050.86	633.999	872.205	0.729042	9.73521e-08	771.647	443.897	631.183	0.797224	0.00818978	female-biased gene
GLRX2	female	male	377.455	120.133	267.174	1.65157	8.69744e-13	429.496	82.8806	280.946	2.3727	4.24578e-15	female-biased gene
SRI	female	male	844.276	483.626	689.712	0.803837	9.94633e-11	197.133	86.9824	149.925	1.17911	0.000240483	female-biased gene
MRPL33	female	male	156.777	65.5699	117.688	1.25766	6.57041e-05	151.004	39.8865	103.382	1.92046	2.0505e-10	female-biased gene
ALDH2	female	male	3273.38	2320.48	2864.99	0.496356	0.00152503	12342.4	8235.26	10582.2	0.583756	0.0363989	female-biased gene
SRSF6	female	male	2218.01	1178.52	1772.52	0.912295	8.03061e-08	1406.86	669.005	1090.63	1.07246	0.0386122	female-biased gene
GSTA4	female	male	2389.97	1775.74	2126.73	0.428558	0.0036014	2435.89	1296.42	1947.54	0.909625	0.0161445	female-biased gene
HSPD1	female	male	2136.07	1491.72	1859.92	0.517969	0.00292019	3399.43	2294.53	2925.9	0.567101	0.0464794	female-biased gene
MGST3	female	male	1044.85	779.78	931.246	0.422153	0.00110966	201.815	97.2962	157.021	1.0501	0.0285884	female-biased gene
CETN3	female	male	266.85	154.441	218.674	0.788942	0.000230707	148.203	68.684	114.123	1.10834	0.00645409	female-biased gene
RPS28	female	male	1337.63	311.026	897.658	2.10457	8.26802e-40	1383.95	199.235	876.214	2.79625	3.12455e-22	female-biased gene
TEFM	female	male	156.883	57.0109	114.081	1.46047	1.21231e-09	377.373	65.7222	243.809	2.52088	0.000411706	female-biased gene
ADH5	female	male	601.232	352.479	494.623	0.770419	1.65569e-05	1837.01	596.643	1305.42	1.62221	0.00116103	female-biased gene
NDUFA8	female	male	892.154	609.208	770.891	0.550317	0.000173828	916.283	428.639	707.292	1.09568	0.00109208	female-biased gene
C17ORF75	female	male	1581.67	1298.8	1460.44	0.284281	0.0066622	419.375	279.101	359.257	0.586717	0.0491342	female-biased gene
PPM1K	female	male	2097.4	1368.54	1785.03	0.615959	0.000149609	592.779	331.268	480.703	0.838625	0.0272527	female-biased gene
COPS4	female	male	951.472	698.65	843.12	0.445548	0.00196976	252.094	121.721	196.22	1.05183	0.0054635	female-biased gene
RTN3	female	male	21345	16242.1	19158	0.39416	0.000137767	1937.9	1218.89	1629.75	0.668828	0.0116234	female-biased gene
SRSF11	female	male	5367.96	3202.45	4439.89	0.745209	1.1725e-07	1399.09	862.285	1169.03	0.697995	0.0365507	female-biased gene
COA6	female	male	148.358	88.5372	122.721	0.744671	0.00370443	117.585	63.1291	94.2465	0.897828	0.0146757	female-biased gene
NDUFS4	female	male	786.27	411.549	625.675	0.933943	1.06781e-10	2000.62	495.757	1355.68	2.01255	0.000508652	female-biased gene
CYP1A5	female	male	64.9789	24.2292	47.5148	1.42336	0.00631988	293.706	77.3602	200.987	1.92482	0.0142448	female-biased gene
ANAPC13	female	male	600.196	328.801	483.884	0.868124	1.15635e-08	453.003	212.822	350.068	1.08919	0.000499273	female-biased gene
SEC31B	female	male	448.749	239.942	359.26	0.903268	4.80273e-08	152.372	74.0915	118.823	1.03805	0.0137919	female-biased gene
IMMP1L	female	male	113.091	60.3739	90.498	0.905685	0.000708246	80.2872	31.5625	59.4052	1.3525	0.0114254	female-biased gene
RSRC1	female	male	387.027	249.75	328.194	0.632015	6.20543e-05	119.749	63.7858	95.7649	0.910269	0.0362707	female-biased gene
ZSCAN4	female	male	388.909	211.633	312.933	0.877871	0.000137041	87.101	35.583	65.0219	1.28707	0.00207963	female-biased gene
ALAD	female	male	1290.14	1043	1184.22	0.306731	0.0471435	1675.04	853.47	1322.94	0.972854	0.0330151	female-biased gene
RAB14	female	male	3645.09	2349.81	3089.97	0.633407	3.24522e-08	2161.48	1206.82	1752.34	0.841101	0.000828965	female-biased gene
RPS3	female	male	5241.24	4241.5	4812.78	0.305329	0.0151967	5304.31	2820.37	4239.76	0.911318	4.42361e-05	female-biased gene
RPS27A	female	male	1948.41	681.855	1405.6	1.51477	1.52203e-54	2388.56	563.088	1606.22	2.08494	1.13945e-24	female-biased gene
PBDC1	female	male	574.339	433.573	514.011	0.405645	0.0034413	212.064	83.6072	157.011	1.34453	0.00323452	female-biased gene
ATPSCKMT	female	male	89.2583	49.921	72.3995	0.838214	0.0103298	79.6184	34.9303	60.4664	1.19034	0.0283539	female-biased gene
PTMS	female	male	3244.85	2487.16	2920.13	0.383654	0.00151806	3230.54	1728.96	2587	0.901911	0.0267477	female-biased gene
LDHB	female	male	6609.72	4158.26	5559.09	0.668611	2.90136e-06	160.21	46.9462	111.668	1.77032	0.0468227	female-biased gene
GMFG	female	male	33.655	15.6238	25.9273	1.10689	0.0441278	114.375	59.8976	91.0277	0.93399	0.0456644	female-biased gene
BDH2	female	male	74.7664	44.1113	61.6285	0.760907	0.0411321	865.808	379.423	657.357	1.19006	0.00454342	female-biased gene
NDUFA2	female	male	739.61	330.341	564.209	1.16277	2.49411e-08	1291.57	347.757	887.077	1.89275	2.36224e-10	female-biased gene
HSPB11	female	male	126.888	34.6362	87.3512	1.87342	7.84473e-11	67.7713	17.6859	46.3061	1.92907	0.000785095	female-biased gene
BTF3	female	male	1191.8	631.094	951.496	0.91723	1.89754e-12	1479.62	617.718	1110.23	1.26033	3.36518e-09	female-biased gene
TMEM87B	female	male	243.911	156.951	206.642	0.636011	0.00548036	430.496	267.687	360.72	0.685154	0.0207658	female-biased gene
TMEM14C	female	male	707.877	389.529	571.442	0.861834	3.51014e-11	730.267	327.837	557.797	1.15562	4.77948e-06	female-biased gene
COX17	female	male	296.377	212.065	260.243	0.482829	0.0274714	1332.7	602.76	1019.87	1.14504	0.00260245	female-biased gene
ECE2	female	male	2197.64	1770.06	2014.39	0.312159	0.0021843	140.563	53.2374	103.137	1.39859	9.18918e-05	female-biased gene
COA5	female	male	762.05	507.31	652.875	0.587021	0.000346218	437.615	248.807	356.698	0.814951	0.0191921	female-biased gene
PRDX4	female	male	139.642	82.1375	114.997	0.765668	0.00301826	1857.56	742.804	1379.81	1.32251	0.000546533	female-biased gene
SNRPF	female	male	429.73	328.507	386.349	0.387532	0.028569	138.565	73.1239	110.519	0.923308	0.0215985	female-biased gene
RPL32	female	male	2161.39	968.72	1650.25	1.15781	1.32746e-21	3103.79	983.713	2195.19	1.65791	7.45765e-17	female-biased gene
VPS25	female	male	446.362	277.971	374.195	0.683372	6.89553e-06	453.454	206.389	347.569	1.13669	0.000892096	female-biased gene
NTAN1	female	male	878.685	519.336	724.678	0.758649	4.67282e-06	1057.72	456.969	800.258	1.21095	0.000175668	female-biased gene
MYNN	female	male	341.98	203.783	282.753	0.746959	2.11927e-06	309.079	138.781	236.094	1.15558	0.0183293	female-biased gene
SLC35A5	female	male	850.053	520.621	708.868	0.707306	6.06042e-07	380.511	212.047	308.312	0.843694	0.00425435	female-biased gene
SMIM30	female	male	685.031	414.226	568.972	0.725749	6.00022e-06	593.537	282.02	460.029	1.07443	0.000482032	female-biased gene
ATP5PD	female	male	1784.59	1074.01	1480.05	0.732568	1.96374e-05	3425.13	1409.38	2561.24	1.281	4.66377e-06	female-biased gene
NDUFB4	female	male	998.303	485.2	778.401	1.04089	1.47258e-13	2076.84	620.448	1452.67	1.74267	6.71172e-07	female-biased gene
SPACA6	female	male	625.129	334.249	500.466	0.903269	1.13786e-05	64.5962	20.0438	45.5023	1.68822	0.00363798	female-biased gene
RPS13	female	male	1585.23	1210.7	1424.72	0.388832	0.011733	1820.38	892.802	1422.85	1.02809	0.00387274	female-biased gene
MYL6	female	male	161.136	18.6923	100.088	3.10771	5.08966e-26	201.524	21.6884	124.451	3.21266	7.45765e-17	female-biased gene
GMFB	female	male	3065.5	2194.46	2692.19	0.482281	0.00024438	474.037	304.865	401.535	0.637414	0.0267132	female-biased gene
RPL22L1	female	male	492.486	131.128	337.618	1.90904	3.20086e-38	958.702	181.725	625.712	2.39879	1.81552e-17	female-biased gene
RPS8	female	male	1879.42	886.84	1454.03	1.08355	1.41183e-06	2889.57	875.723	2026.49	1.72258	2.40403e-07	female-biased gene
PSMC6	female	male	1352.82	944.777	1177.95	0.517943	4.74535e-07	1272.54	728.525	1039.39	0.804692	0.0279272	female-biased gene
RPS21	female	male	565.566	183.824	401.963	1.62128	2.3246e-19	1186.3	212.472	768.943	2.48112	1.13945e-24	female-biased gene
TAMM41	female	male	252.518	173.722	218.748	0.539544	0.0102454	86.0367	25.6672	60.1641	1.73992	3.44961e-05	female-biased gene
TM2D3	female	male	541.834	384.881	474.569	0.493441	0.0415979	313.155	168.908	251.335	0.892477	0.0371825	female-biased gene
BTK	female	male	587.777	475.008	539.447	0.307295	0.0375885	819.151	491.214	678.606	0.737486	0.014758	female-biased gene
RPL10	female	male	1895.78	1496.39	1724.61	0.341311	0.0010294	3322.32	2044.76	2774.79	0.70041	0.0152589	female-biased gene
MAGOHB	female	male	265.222	100.832	194.769	1.39532	3.57675e-11	69.5647	20.9185	48.7163	1.72865	0.00173615	female-biased gene
HPF1	female	male	416.709	203.508	325.337	1.03407	8.38744e-12	95.9245	25.6379	65.8017	1.89982	1.69513e-05	female-biased gene
LSM3	female	male	140.471	76.3214	112.978	0.880125	0.00500242	281.905	105.347	206.237	1.41975	0.000179341	female-biased gene
ETFA	female	male	634.458	479.994	568.259	0.402401	0.0174532	3913.34	2508.33	3311.19	0.641704	0.0173016	female-biased gene
NDUFA13	female	male	949.759	687.552	837.385	0.466054	0.0344931	2827.63	846.816	1978.71	1.73941	3.44961e-05	female-biased gene
RASSF4	female	male	953.644	756.609	869.201	0.333842	0.030873	664.891	396.319	549.788	0.746751	0.0170378	female-biased gene
ATP23	female	male	281.499	189.917	242.249	0.567781	0.00629113	116.553	54.601	90.0019	1.09184	0.0360574	female-biased gene
VBP1	female	male	883.055	457.518	700.682	0.948691	2.61259e-13	183.771	92.4237	144.622	0.991815	0.00625534	female-biased gene
RPL7	female	male	2339.88	1457.63	1961.77	0.682796	8.47118e-06	3990.65	1724.35	3019.38	1.21067	6.85253e-08	female-biased gene
NDUFB8	female	male	1573.38	1008.17	1331.15	0.6421	6.04412e-10	2125.69	859.415	1583	1.30635	3.04151e-07	female-biased gene
TIMM17A	female	male	922.725	509.607	745.674	0.856497	3.57675e-11	126.738	56.7834	96.7574	1.15822	0.0141458	female-biased gene
AKIP1	female	male	668.472	500.317	596.406	0.418053	0.0204353	221.292	106.052	171.904	1.062	0.00298965	female-biased gene
FMC1	female	male	141.301	60.6732	106.746	1.21947	9.2774e-07	275.34	49.5809	178.586	2.47338	2.90104e-08	female-biased gene
SELENOF	female	male	1280.48	735.238	1046.81	0.800429	2.52375e-09	2558.32	1038.13	1906.81	1.30123	4.87875e-06	female-biased gene
YPEL5	female	male	1406.02	751.68	1125.59	0.903438	5.99414e-19	537.001	246.284	412.408	1.12375	0.00252741	female-biased gene
PSMD8	female	male	1861.79	1490.63	1702.72	0.320758	0.0285386	1736.16	991.487	1417.01	0.808335	0.0032804	female-biased gene
RARS2	female	male	267.203	199.481	238.179	0.421546	0.0371259	168.32	84.2359	132.284	0.997796	0.048009	female-biased gene
MAP1LC3B	female	male	1226.67	590.029	953.823	1.05582	6.41305e-13	1673.61	756.628	1280.62	1.14552	5.98535e-05	female-biased gene
ATG5	female	male	521.564	313.404	432.353	0.734807	9.51159e-06	262.222	169.203	222.357	0.63286	0.0380673	female-biased gene
TRAPPC2	female	male	503.233	294.799	413.904	0.771588	2.17881e-07	139.8	39.4742	96.8031	1.82334	1.15869e-07	female-biased gene
CMC1	female	male	189.812	128.391	163.489	0.56425	0.0175837	140.795	44.2432	99.4156	1.66734	0.000309449	female-biased gene
HYPK	female	male	671.363	295.393	510.233	1.18452	7.71423e-14	635.704	205.372	451.276	1.63031	1.00286e-05	female-biased gene
FDX1	female	male	460.878	315.976	398.777	0.544551	0.000512736	3474.1	1742.01	2731.77	0.995921	0.00189095	female-biased gene
RPS29	female	male	1186.89	482.557	885.031	1.29838	1.42382e-14	2061.38	477.863	1382.73	2.10932	7.65639e-22	female-biased gene
FDFT1	female	male	1119.56	888.749	1020.64	0.333081	0.00994433	1188.46	669.593	966.089	0.828082	0.0460039	female-biased gene
LAMTOR5	female	male	693.562	454.42	591.072	0.609967	0.00126449	543.106	275.214	428.295	0.980758	0.00029188	female-biased gene
SDHD	female	male	1063.56	699.875	907.696	0.60366	0.000192561	2888.43	1504.41	2295.28	0.941064	0.0191921	female-biased gene
NDUFB5	female	male	928.378	667.926	816.756	0.475012	0.00929175	1605.43	588.381	1169.55	1.44821	7.13363e-06	female-biased gene
MT-CO3	female	male	3707.99	2039.69	2993	0.862283	2.72484e-09	4871.92	2413.09	3818.14	1.0135	0.00933098	female-biased gene
COX7B	female	male	2715.74	1110.33	2027.71	1.29035	1.30935e-23	6370.45	1752.72	4391.42	1.86176	1.05765e-17	female-biased gene
ATP5PO	female	male	2321.6	1585.54	2006.15	0.550141	0.000245981	4888.9	1949.68	3629.23	1.32623	0.000961814	female-biased gene
RNF187	female	male	1015.39	422.227	761.178	1.26592	8.32724e-23	104.24	21.2516	68.6735	2.29947	0.000998675	female-biased gene
SLIRP	female	male	228.628	102.367	174.516	1.15938	2.11007e-09	451.432	126.24	312.064	1.8378	1.86965e-05	female-biased gene
PPCDC	female	male	286.21	199.996	249.261	0.517119	0.0428216	306.67	120.849	227.032	1.34332	0.00645409	female-biased gene
NKAP	female	male	218.626	155.682	191.65	0.489848	0.0202056	162.418	92.0254	132.249	0.818853	0.0499273	female-biased gene
ATP5F1A	female	male	9661.18	6728.2	8404.19	0.521974	2.29569e-06	11787.8	7568.74	9979.62	0.639144	0.0477552	female-biased gene
ZNF565	female	male	207.06	132.981	175.312	0.638987	0.0036014	92.0248	39.9784	69.7192	1.20474	0.00432961	female-biased gene
NACA	female	male	2343.74	1725.76	2078.89	0.441567	0.000257191	2841.8	1655.48	2333.38	0.779602	0.00145794	female-biased gene
RPL39	female	male	977.211	552.503	795.193	0.822685	4.46193e-08	2207.76	651.366	1540.73	1.76112	5.46286e-13	female-biased gene
SNRPG	female	male	169.603	117.629	147.329	0.527747	0.0346379	331.787	178.747	266.199	0.890723	0.00645409	female-biased gene
ATP5MF	female	male	1030.13	538.722	819.526	0.935176	3.25178e-08	3200.6	1034.45	2272.25	1.62942	3.73682e-10	female-biased gene
RPL17	female	male	2492.55	2003.87	2283.12	0.31481	0.0142376	3304.92	2113.45	2794.29	0.645098	0.00512432	female-biased gene
HHIPL2	female	male	590.302	343.362	484.47	0.781766	0.00512907	563.008	175.733	397.033	1.6803	0.00179072	female-biased gene
ESD	female	male	523.448	276.481	417.605	0.921035	2.71543e-07	1039.17	388.752	760.42	1.41819	0.00209842	female-biased gene
RFESD	female	male	99.0983	56.0811	80.6623	0.821362	0.0130031	143.04	44.9053	100.983	1.66862	0.00617938	female-biased gene
PRDX5	female	male	1936.74	1279.65	1655.13	0.59788	5.56513e-06	2214.56	1445.19	1884.83	0.615922	0.0346721	female-biased gene
PPIA	female	male	6148.31	3977.94	5218.15	0.628163	2.508e-05	5817.43	2772.25	4512.35	1.06938	0.000225299	female-biased gene
ZNF354A	female	male	541.304	365.246	465.851	0.567558	0.00019775	239.768	149.901	201.254	0.677484	0.0396829	female-biased gene
UQCRQ	female	male	440.895	174.303	326.641	1.33871	3.54466e-17	2404.77	457.863	1570.38	2.39297	2.4455e-23	female-biased gene
PCBD2	female	male	131.965	37.7059	91.5684	1.80748	5.59435e-10	101.904	20.5064	67.0196	2.31602	3.76546e-06	female-biased gene
NTPCR	female	male	372.684	270.29	328.8	0.463527	0.012633	229.183	103.175	175.18	1.15076	0.000663968	female-biased gene
PHPT1	female	male	583.444	374.407	493.857	0.63995	1.8355e-05	446.1	163.066	324.8	1.45157	4.78268e-05	female-biased gene
ERICH3	female	male	1027.05	796.226	928.127	0.36725	0.0222172	146.344	49.2949	104.751	1.57274	0.00786795	female-biased gene
SLC35B3	female	male	435.742	306.984	380.56	0.505317	0.000910591	407.172	246.2	338.184	0.726992	0.00807941	female-biased gene
SDR39U1	female	male	1016.78	752.31	903.436	0.434586	0.000129267	473.304	227.438	367.933	1.05723	0.00333051	female-biased gene
DERL2	female	male	388.724	263.912	335.234	0.558755	0.000633965	1021.18	439.327	771.813	1.21711	0.000301177	female-biased gene
TRIAP1	female	male	70.738	34.924	55.3892	1.01816	0.00487229	84.3069	43.2386	66.7062	0.964484	0.0244028	female-biased gene
MAIP1	female	male	356.662	180.196	281.033	0.985001	3.02001e-09	345.198	152.688	262.694	1.17593	9.18918e-05	female-biased gene
URAH	female	male	322.676	219.749	278.564	0.554297	0.00872816	3056.39	1461.36	2372.81	1.06449	0.00067484	female-biased gene
MRPL11	female	male	444.327	333.665	396.9	0.41319	0.00588251	983.663	445.916	753.2	1.14146	0.00852091	female-biased gene
PTPA	female	male	4179.84	3317.94	3810.45	0.333154	0.0131504	1722.08	1007.19	1415.7	0.774114	0.0433212	female-biased gene
ZNF787	female	male	307.575	204.384	263.35	0.589846	0.00569633	275.921	172.367	231.541	0.679881	0.0260689	female-biased gene
PHYH	female	male	1943.2	1425.03	1721.13	0.447401	0.000257191	68701	41300.7	56958	0.734164	0.026607	female-biased gene
RPL30	female	male	1973.27	1531.12	1783.78	0.365994	0.0241346	2893.25	1571.49	2326.78	0.880669	0.00107915	female-biased gene
BEX4	female	male	476.722	296.673	399.558	0.684292	1.09353e-05	185.625	73.1881	137.438	1.34282	0.00706092	female-biased gene
MRPS18C	female	male	350.88	265.116	314.124	0.404535	0.0330906	317.276	206.435	269.773	0.619365	0.0466666	female-biased gene
CCNC	female	male	636.015	487.034	572.166	0.385055	0.00864774	943.121	579.125	787.123	0.703817	0.00202076	female-biased gene
RPS24	female	male	3327.13	2359.36	2912.37	0.495877	0.000246211	6071.67	2355.51	4479.03	1.36605	6.43006e-07	female-biased gene
ATP5ME	female	male	902.641	239.896	618.608	1.91164	4.64482e-29	4024.38	485.723	2507.81	3.05042	4.40269e-27	female-biased gene
MRPL9	female	male	405.497	284.941	353.83	0.509067	0.00661897	660.605	391.476	545.264	0.755322	0.0432361	female-biased gene
RPL27	female	male	1432.71	857.05	1186	0.741284	3.82271e-08	2278.23	862.488	1671.48	1.40134	3.5307e-12	female-biased gene
RPL24	female	male	3562.96	2544.05	3126.28	0.485931	0.000707968	5605.16	2519.12	4282.57	1.15393	2.32517e-06	female-biased gene
MCEE	female	male	153.164	96.8163	129.015	0.661671	0.0173769	193.162	80.3444	144.812	1.26608	0.0355507	female-biased gene
CPQ	female	male	122.919	79.0525	104.119	0.636839	0.0231996	190.753	103.819	153.496	0.878175	0.0170497	female-biased gene
BROX	female	male	1088.88	675.719	911.81	0.68831	7.53295e-07	287.754	181.896	242.387	0.661318	0.0250926	female-biased gene
C12ORF76	female	male	625.876	460.086	554.823	0.44402	0.00400575	191.452	79.5545	143.496	1.26585	0.000970964	female-biased gene
ZRANB2	female	male	3088.16	2133.77	2679.13	0.533359	0.000286307	987.173	557.494	803.025	0.823979	0.0079571	female-biased gene
PIN4	female	male	177.937	121.377	153.697	0.551746	0.0483588	143.895	59.8854	107.891	1.26214	0.00182852	female-biased gene
ZBTB8A	female	male	3005.82	2069.46	2604.52	0.538518	6.28781e-08	1146.39	804.245	999.758	0.511561	0.0444999	female-biased gene
MED30	female	male	160.869	84.5257	128.151	0.928159	0.000470192	149.575	66.5722	114.002	1.16512	0.0066308	female-biased gene
HMGB2	female	male	171.383	83.6961	133.803	1.03424	4.15149e-05	157.666	82.4269	125.42	0.93267	0.0404527	female-biased gene
FBXL2	female	male	662.93	528.236	605.204	0.327737	0.0194664	63.3631	19.967	44.7648	1.66906	0.0228158	female-biased gene
MGARP	female	male	932.711	449.674	725.695	1.0526	2.51701e-13	1172.87	123.446	723.115	3.24622	3.78231e-23	female-biased gene
RPP30	female	male	204.943	117.352	167.404	0.804482	0.00246518	49.9817	20.0645	37.16	1.30787	0.0311525	female-biased gene
PEX11B	female	male	1764	1397.75	1607.03	0.335759	0.00844975	1328.64	639.609	1033.34	1.0547	0.0113505	female-biased gene
MICOS13	female	male	1168.21	858.047	1035.28	0.445202	0.00149946	725.33	322.058	552.499	1.17074	0.000105002	female-biased gene
GHDC	female	male	206.675	127.154	172.595	0.700742	0.00198552	132.041	48.9931	96.4493	1.42815	0.00335165	female-biased gene
MTX3	female	male	1316.45	870.523	1125.34	0.596679	0.000105049	175.011	106.836	145.793	0.711305	0.0473244	female-biased gene
SSR4	female	male	293.181	125.961	221.515	1.21877	2.13206e-09	1399.4	358.55	953.323	1.96431	1.72934e-14	female-biased gene
EBP	female	male	66.2355	34.0121	52.4255	0.961551	0.00477406	454.369	125.312	313.344	1.85787	2.82701e-05	female-biased gene
LSM7	female	male	263.721	127.78	205.461	1.04531	0.000447433	244.153	63.5961	166.772	1.94064	1.1018e-08	female-biased gene
FN3K	female	male	1841.1	1528.07	1706.94	0.268852	0.0270733	300.03	162.439	241.062	0.885245	0.0274828	female-biased gene
NDUFC2	female	male	806.396	348.045	609.96	1.21212	1.32426e-24	858.686	256.192	600.475	1.74434	3.33994e-11	female-biased gene
PABPN1	female	male	2668.37	1952.04	2361.37	0.450983	8.91612e-05	1136.01	572.942	894.693	0.987716	0.00830001	female-biased gene
SLC22A5	female	male	910.214	599.898	777.222	0.601442	6.00469e-06	858.704	338.954	635.954	1.34084	0.00463121	female-biased gene
TRAPPC13	female	male	1495.52	1214.6	1375.12	0.300171	0.00813885	554.473	300.576	445.66	0.883392	0.0206697	female-biased gene
TMEM67	female	male	1053.34	526.655	827.616	1.00002	1.68308e-08	275.513	153.141	223.067	0.847483	0.00317224	female-biased gene
MRPL43	female	male	426.865	300.96	372.906	0.504231	0.00436854	571.169	227.307	423.8	1.32978	0.000381742	female-biased gene
C2CD5	female	male	1397.25	1041.36	1244.73	0.424126	0.000989132	164.86	95.1975	135.005	0.790529	0.0175353	female-biased gene
CCDC167	female	male	61.2065	32.1628	48.7592	0.928093	0.0150139	65.0373	23.3934	47.1899	1.47571	0.00438349	female-biased gene
PSMA2	female	male	1033.02	544.602	823.696	0.923634	7.39747e-17	3534.28	1063.4	2475.33	1.73274	9.24565e-05	female-biased gene
PNISR	female	male	4703.55	3348.92	4123	0.490063	0.000407223	1155.51	624.651	928.002	0.887226	0.00272756	female-biased gene
DIPK2A	female	male	362.047	268.389	321.908	0.431895	0.0327173	399.398	270.659	344.224	0.561119	0.0449519	female-biased gene
COX7A2P2	female	male	1220.79	557.655	936.587	1.13034	4.53759e-10	2012.67	698.144	1449.3	1.52753	5.31063e-15	female-biased gene
NUDT2	female	male	194.96	107.843	157.624	0.854239	4.98262e-05	247.5	87.9594	179.126	1.49307	0.000103192	female-biased gene
TMBIM4	female	male	571	381.662	489.855	0.581247	0.00647846	623.368	331.289	498.191	0.912196	0.00713594	female-biased gene
HNRNPH1	female	male	5715.03	4105.27	5025.13	0.477289	3.3445e-05	2838.25	1464.39	2249.46	0.954728	0.000422487	female-biased gene
COX16	female	male	234.993	117.307	184.556	1.00216	1.09675e-06	325.837	83.151	221.828	1.97049	3.18262e-16	female-biased gene
OGT	female	male	5971.17	4229.95	5224.93	0.497381	3.28281e-09	2283.06	1056.04	1757.19	1.11234	0.000916313	female-biased gene
MRPL18	female	male	585.273	374.154	494.793	0.645482	0.000319672	406.823	155.867	299.271	1.38455	0.00865722	female-biased gene
FAM207A	female	male	373.112	216.385	305.943	0.786207	4.84654e-06	225.809	108.543	175.552	1.0587	0.0157563	female-biased gene
OCEL1	female	male	141.561	91.3117	120.026	0.632423	0.0457793	311.514	184.646	257.142	0.756071	0.0254937	female-biased gene
ATP5F1E	female	male	1067.92	570.774	854.857	0.903743	5.7106e-10	4372.33	1542.57	3159.57	1.50319	3.70943e-15	female-biased gene
VPS26C	female	male	741.266	554.693	661.306	0.418222	0.0336391	362.108	242.296	310.76	0.579836	0.0400004	female-biased gene
AOPEP	female	male	478.6	350.248	423.592	0.450516	0.00761544	622.891	382.069	519.682	0.704896	0.0405367	female-biased gene
H2AZ1	female	male	988.882	622.432	831.832	0.667854	9.58751e-05	627.018	369.784	516.775	0.762571	0.0296674	female-biased gene
WDR11	female	male	1132	835.875	1005.09	0.437468	0.00199526	358.553	238.153	306.953	0.590043	0.0332499	female-biased gene
ZNF276	female	male	887.32	584.701	757.626	0.60179	0.00120049	493.478	249.526	388.927	0.983367	0.010817	female-biased gene
ERP29	female	male	681.652	460.252	586.766	0.566625	0.000393793	2381.54	1516.53	2010.82	0.65116	0.035064	female-biased gene
RTN4IP1	female	male	214.907	114.885	172.041	0.903399	3.29175e-05	132.595	59.5736	101.3	1.15135	0.0228334	female-biased gene
COPS5	female	male	983.746	708.461	865.767	0.473558	0.000162852	916.377	513.953	743.909	0.8345	0.0320055	female-biased gene
MRPL3	female	male	745.503	557.294	664.842	0.419757	0.00234369	418.203	281.475	359.605	0.570946	0.0267731	female-biased gene
B3GALNT1	female	male	889.585	605.036	767.636	0.55608	1.31241e-05	44.2533	15.0549	31.7397	1.56282	0.0143497	female-biased gene
METAP1D	female	male	177.993	96.2046	142.941	0.887664	0.00254732	179.301	52.952	125.151	1.76177	0.000392142	female-biased gene
COX6B1	female	male	2554.09	1229.98	1986.61	1.05416	2.72031e-13	3567.2	1176.55	2542.64	1.60004	1.81682e-10	female-biased gene
DNASE2	female	male	275.876	180.534	235.015	0.611771	0.00997484	460.82	212.255	354.292	1.11842	0.00396361	female-biased gene
OCC1	female	male	403.331	260.733	342.218	0.629452	0.000283664	47.7065	19.4754	35.6074	1.29383	0.0288362	female-biased gene
RPS20	female	male	2172.87	1664.84	1955.14	0.38419	0.00483081	4768.56	2240.92	3685.29	1.08953	6.59357e-06	female-biased gene
UQCR10	female	male	1336.58	889.074	1144.79	0.588144	0.000447433	2840.21	1242.05	2155.28	1.19325	8.27493e-08	female-biased gene
APBB3	female	male	1101.9	779.661	963.799	0.49914	8.71806e-05	558.207	217.567	412.218	1.35915	8.97537e-07	female-biased gene
HNRNPA2B1	female	male	12376.1	8838.44	10860	0.485699	8.34533e-05	6787.71	4929.73	5991.43	0.461473	0.0479478	female-biased gene
HACD3	female	male	2109.19	1387.29	1799.8	0.60444	1.87727e-10	2088.46	1172	1695.69	0.833501	3.16533e-05	female-biased gene
MICOS10	female	male	602.266	268.713	459.315	1.16431	2.22685e-08	688.841	209.687	483.489	1.71551	5.33055e-08	female-biased gene
PSMB7	female	male	1154	656.721	940.882	0.813293	1.71353e-11	2442.24	834.192	1753.08	1.5497	0.000401865	female-biased gene
UTP18	female	male	373.031	230.076	311.765	0.697273	0.000369579	240.153	145.099	199.416	0.726804	0.0150148	female-biased gene
JKAMP	female	male	567.715	405.164	498.051	0.486724	0.00232388	445.214	261.022	366.275	0.770131	0.0437742	female-biased gene
TMEM70	female	male	502.66	372.302	446.793	0.433079	0.00195901	300.616	169.065	244.237	0.830641	0.00153336	female-biased gene
SNRPA1	female	male	387.761	216.025	314.16	0.84388	4.17051e-07	226.927	98.83	172.028	1.19817	0.00164411	female-biased gene
JAML	female	male	293.698	197.233	252.356	0.5744	0.0275295	1844.33	870.97	1427.17	1.08261	0.00235248	female-biased gene
RBM45	female	male	672.776	369.717	542.893	0.863619	2.78054e-07	123.28	48.0696	91.0467	1.35859	0.00766193	female-biased gene
HIBCH	female	male	929.188	624.886	798.773	0.572363	0.000147977	354.017	181.84	280.227	0.960484	0.0300126	female-biased gene
SEM1	female	male	494.345	340.693	428.494	0.536934	0.0021099	510.246	303.795	421.767	0.747967	0.00260383	female-biased gene
NAE1	female	male	653.704	432.758	559.013	0.595166	0.000139751	108.616	51.1839	84.0021	1.08052	0.0360574	female-biased gene
NDUFAF2	female	male	774.665	599.371	699.539	0.37006	0.00244161	281.44	162.758	230.576	0.791082	0.00827687	female-biased gene
UQCC2	female	male	855.412	485.031	696.678	0.818486	4.30816e-06	850.817	268.291	601.163	1.66508	0.00181577	female-biased gene
TBCA	female	male	549.894	264.385	427.533	1.05643	1.12284e-09	302.173	105.065	217.698	1.5249	2.8855e-05	female-biased gene
NME7	female	male	4082.72	1337.03	2906	1.61051	4.64482e-29	381.203	116.047	267.565	1.71642	1.22488e-08	female-biased gene
CYB5B	female	male	1303.95	936.656	1146.54	0.477313	0.000707968	1471.45	805.978	1186.25	0.868371	0.0180094	female-biased gene
TMED8	female	male	1430.9	1060.35	1272.09	0.432431	0.000248984	3309.42	1535.18	2549.03	1.10809	2.73031e-07	female-biased gene
MRPL13	female	male	212.809	121.026	173.474	0.814115	3.61744e-05	227.383	92.7051	169.664	1.29282	1.64713e-05	female-biased gene
METTL6	female	male	315.011	203.765	267.334	0.628306	0.00141059	448.697	173.021	330.55	1.37349	0.0117417	female-biased gene
DYNLT2	female	male	79.301	35.5384	60.5456	1.15761	0.00213574	46.4831	18.402	34.4483	1.34029	0.0191921	female-biased gene
POLR2F	female	male	320.124	211.481	273.563	0.598115	0.0036605	323.917	144.712	247.115	1.16389	0.000525487	female-biased gene
PRICKLE4	female	male	1751.23	1363.4	1585.02	0.361174	0.0098142	246.807	140.642	201.307	0.810887	0.0453559	female-biased gene
ATP6V1H	female	male	1978.91	1316.46	1695.01	0.588045	2.33316e-07	264.154	151.781	215.994	0.79974	0.0168858	female-biased gene
RMDN1	female	male	285.53	187.266	243.417	0.608472	0.00406158	219.615	90.0279	164.078	1.28421	4.42361e-05	female-biased gene
HINT2	female	male	481.196	258.622	385.807	0.89567	3.52656e-07	2136.97	701.572	1521.8	1.60698	3.54293e-10	female-biased gene
RIOK2	female	male	253.322	147.374	207.916	0.781429	0.000199453	291.801	180.299	244.014	0.695122	0.0463145	female-biased gene
ITPA	female	male	457.89	320.004	398.796	0.516954	0.00626265	116.426	54.0778	89.7054	1.10559	0.00477732	female-biased gene
FIGNL1	female	male	579.485	378.886	493.514	0.612929	0.00139835	389.217	179.119	299.175	1.11956	0.00700666	female-biased gene
DBI	female	male	1201.34	731.112	999.813	0.716456	1.85364e-05	5554.89	2035.05	4046.39	1.44865	6.92773e-10	female-biased gene
CREG1	female	male	634.589	387.578	528.727	0.711263	0.000162682	10171.6	5242.43	8059.1	0.956296	0.00985007	female-biased gene
MRPL14	female	male	659.866	521.1	600.395	0.340519	0.0260055	247.406	116.273	191.206	1.08915	0.00175053	female-biased gene
SAP30	female	male	182.519	95.9045	145.399	0.928399	3.19412e-05	67.0125	31.2834	51.7	1.10044	0.0228334	female-biased gene
PFDN1	female	male	687.009	487.874	601.665	0.493848	7.52864e-05	636.4	274.111	481.133	1.21547	0.0054635	female-biased gene
MPHOSPH6	female	male	222.204	115.854	176.625	0.939746	3.26816e-05	80.2091	17.9631	53.5322	2.16325	0.000109519	female-biased gene
RPL34	female	male	732.319	410.572	594.427	0.834817	1.40011e-09	1110.1	395.88	804.005	1.48792	3.48512e-09	female-biased gene
PEX3	female	male	383.672	261.336	331.242	0.553914	0.00380656	224.49	132.27	184.967	0.761951	0.0214166	female-biased gene
RPS12	female	male	980.939	655.405	841.425	0.581732	0.000348476	3215.05	1254.78	2374.93	1.35748	1.73961e-05	female-biased gene
ABCC10	female	male	585.622	429.254	518.607	0.448177	0.00266841	69.3247	31.665	53.1848	1.12757	0.0244028	female-biased gene
PFDN6	female	male	435.295	261.72	360.906	0.734001	0.000140012	213.857	95.1391	162.978	1.16907	0.000303853	female-biased gene
FKBP3	female	male	918.801	579.173	773.246	0.665736	5.94557e-06	172.228	78.6041	132.104	1.13059	0.00177932	female-biased gene
SEC61G	female	male	442.119	163.324	322.635	1.43663	2.93124e-16	663.031	168.068	450.904	1.98004	1.09447e-10	female-biased gene
D2HGDH	female	male	484.647	310.974	410.215	0.64024	0.0249935	399.552	228.182	326.108	0.808503	0.0492899	female-biased gene
MRPL2	female	male	340.908	194.594	278.202	0.808824	1.85557e-05	553.365	305.443	447.113	0.857031	0.0213836	female-biased gene
NGLY1	female	male	520.171	360.473	451.729	0.529024	0.0386793	356.057	209.429	293.217	0.765502	0.0130266	female-biased gene
TMEM126A	female	male	382.859	249.362	325.646	0.618501	0.00127404	467.444	200.044	352.844	1.22421	0.015552	female-biased gene
MRPS23	female	male	1073.56	601.122	871.087	0.8367	2.78054e-07	493.195	262.907	394.5	0.908192	0.00270373	female-biased gene
TMEM167A	female	male	1088.72	665.862	907.497	0.709337	1.63736e-09	1171.54	439.016	857.603	1.41611	3.01197e-05	female-biased gene
TRA2A	female	male	2058.47	990.098	1600.6	1.05597	9.5753e-10	365.844	134.832	266.839	1.43939	0.00108131	female-biased gene
CD19	female	male	188.427	128.083	162.565	0.556845	0.0161503	157.323	71.5009	120.542	1.13794	0.00663935	female-biased gene
ELOF1	female	male	667.347	508.086	599.093	0.393391	0.0170544	380.154	206.578	305.764	0.880855	0.0100706	female-biased gene
FIGNL2	female	male	208.86	140.059	179.374	0.576461	0.0310227	219.851	104.123	170.253	1.07692	0.0164095	female-biased gene
ZNF256	female	male	408.897	243.808	338.145	0.74597	0.00027485	93.2241	32.5785	67.2331	1.51592	0.00471561	female-biased gene
PSMB4	female	male	1318.5	768.299	1082.7	0.779172	8.33438e-12	1290.41	647.783	1015	0.993866	0.000251834	female-biased gene
FAM32A	female	male	1226.18	836.712	1059.27	0.551352	0.00015132	785.322	446.256	640.008	0.81568	0.00151966	female-biased gene
VWA7	female	male	937.101	680.259	827.026	0.462084	0.0270285	53.1563	18.3422	38.236	1.53153	0.0316714	female-biased gene
TAF11	female	male	605.001	431.107	530.475	0.488837	0.00124283	400.668	222.622	324.362	0.846827	0.00314092	female-biased gene
NDUFA1	female	male	377.461	157.817	283.328	1.25815	2.28262e-14	1062.7	234.173	707.614	2.18213	1.33216e-21	female-biased gene
RPL18	female	male	1107.9	746.11	952.848	0.570352	0.000503252	1737.67	851.747	1357.99	1.02867	5.04778e-05	female-biased gene
RBM5	female	male	2276.48	1425.86	1911.93	0.674996	1.78958e-05	582.923	304.904	463.772	0.934672	0.0137919	female-biased gene
CDK7	female	male	1103.96	883.36	1009.42	0.321579	0.00892117	1477.82	668.686	1131.05	1.1442	1.41256e-05	female-biased gene
MED21	female	male	234.896	133.246	191.332	0.81792	9.27084e-05	469.384	144.439	330.122	1.70032	9.32862e-05	female-biased gene
COMMD3	female	male	684.036	528.43	617.348	0.37238	0.0400785	241.144	118.322	188.506	1.02669	0.0292167	female-biased gene
PTS	female	male	542.853	365.274	466.748	0.571505	0.00020477	517.048	271.859	411.967	0.926577	0.00390313	female-biased gene
RPL27A	female	male	2318.59	1576.67	2000.62	0.556357	1.16651e-05	3561.64	1666.73	2749.53	1.09558	3.66598e-05	female-biased gene
RPS19	female	male	1418.62	1016.69	1246.36	0.480636	0.000891329	2043.58	1004.77	1598.37	1.02435	0.00143929	female-biased gene
RPL9	female	male	3836.39	2366.09	3206.26	0.697223	1.0353e-09	5380.69	2337.01	4076.26	1.20323	2.02083e-08	female-biased gene
CYP51A1	female	male	839.404	680.97	771.504	0.301735	0.0326164	1769.9	657.227	1293.04	1.42927	0.0134001	female-biased gene
TARDBP	female	male	635.575	351.396	513.784	0.854926	9.73521e-08	230.004	116.573	181.391	0.979263	0.00560634	female-biased gene
POLE4	female	male	377.185	249.502	322.464	0.596207	0.00133848	258.016	96.3451	188.728	1.42288	0.00133189	female-biased gene
GSTM3	female	male	122.386	70.768	100.264	0.790232	0.0118162	1236.01	345.564	854.393	1.83852	4.33758e-11	female-biased gene
NDUFA7	female	male	674.201	521.22	608.638	0.371248	0.0342376	738.317	341.26	568.15	1.11294	0.000806341	female-biased gene
HBB	female	male	19345	3922.68	12735.4	2.30204	0.0356375	10212.2	2490.83	6903.06	2.0356	3.76546e-06	female-biased gene
SCML1	female	male	599.13	307.256	474.041	0.963351	5.21075e-08	403.307	179.312	307.309	1.16943	0.0157198	female-biased gene
PET100	female	male	225.395	129.624	184.35	0.798232	0.000116553	297.612	85.6583	206.775	1.79736	3.76546e-06	female-biased gene
FDX2	female	male	269.473	191.572	236.087	0.492318	0.0254935	165.483	64.6704	122.277	1.35563	0.00769936	female-biased gene
UNC50	female	male	375.997	182.022	292.865	1.0466	5.61541e-08	222.823	103.827	171.825	1.10321	0.000219123	female-biased gene
COX7A1	female	male	458.222	288.697	385.569	0.666387	0.000495506	1775.9	822.816	1367.43	1.10993	0.000791024	female-biased gene
NDUFAF5	female	male	507.257	342.291	436.557	0.567567	6.10209e-05	66.2457	25.8161	48.9187	1.3609	0.013307	female-biased gene
NEDD8	female	male	945.899	717.954	848.208	0.397762	0.017323	672.607	434.873	570.721	0.629764	0.0134038	female-biased gene
TMEM218	female	male	270.692	138.254	213.933	0.969445	0.00103552	78.1681	31.0401	57.9704	1.32878	0.0432361	female-biased gene
RPL23	female	male	2118.93	1408.93	1814.65	0.58872	7.69219e-06	4526.5	1712.97	3320.7	1.40193	2.09225e-12	female-biased gene
SUGP2	female	male	2501	2075.13	2318.49	0.269292	0.00982807	236.839	120.972	187.181	0.96865	0.0166945	female-biased gene
RAB12	female	male	1634.63	1137.55	1421.6	0.523041	7.13078e-08	479.964	301.143	403.326	0.672403	0.0465499	female-biased gene
DIPK1A	female	male	531.519	308.36	435.879	0.785568	7.16525e-06	320.959	130.031	239.133	1.30398	0.00968434	female-biased gene
ABHD10	female	male	352.307	245.238	306.42	0.522779	0.0127328	72.6753	32.9542	55.652	1.13817	0.0220477	female-biased gene
ZSWIM7	female	male	100.024	62.5307	83.9556	0.678171	0.04632	166.302	55.954	119.01	1.57182	1.11177e-06	female-biased gene
LAMTOR4	female	male	503.485	361.247	442.526	0.47892	0.00851933	507.305	272.285	406.582	0.89851	0.0228334	female-biased gene
ZNF772	female	male	661.887	396.625	548.203	0.738835	0.00440036	59.8965	28.6861	46.5206	1.05988	0.0463145	female-biased gene
NDUFB11	female	male	588.867	401.98	508.773	0.550768	0.00584069	1427.76	543.546	1048.81	1.39326	2.42104e-06	female-biased gene
TBC1D7	female	male	168.734	118.248	147.097	0.512906	0.0457811	243.542	86.509	176.242	1.49266	0.000441638	female-biased gene
MLH3	female	male	667.919	423.738	563.27	0.656551	3.77986e-06	500.691	155.133	352.595	1.69005	0.000927389	female-biased gene
SMIM20	female	male	253.934	149.19	209.044	0.767117	0.000296774	164.434	65.5883	122.072	1.32544	0.00471727	female-biased gene
RPL35A	female	male	1957.26	1318.65	1683.57	0.569773	0.000302883	1978.79	881.582	1508.56	1.16656	5.57888e-08	female-biased gene
FAM162A	female	male	873.521	673.062	787.61	0.37615	0.00523508	886.714	544.914	740.228	0.702266	0.0032804	female-biased gene
GALE	female	male	377.659	289.962	340.074	0.381395	0.0387481	1539.85	929.467	1278.26	0.728674	0.0246466	female-biased gene
WDR41	female	male	596.662	335.27	484.637	0.831545	2.41179e-08	172.62	82.409	133.958	1.06574	0.0129341	female-biased gene
UPRT	female	male	399.304	235.002	328.889	0.764756	1.25994e-07	193.597	116.275	160.459	0.734503	0.0145575	female-biased gene
IER3IP1	female	male	911.956	647.474	798.606	0.494213	0.0112812	913.374	457.641	718.06	0.996971	0.000452078	female-biased gene
ADPRM	female	male	337.159	193.417	275.555	0.801891	1.78958e-05	308.957	173.517	250.911	0.833799	0.033331	female-biased gene
HTRA2	female	male	439.888	300.608	380.196	0.549218	0.000479433	181.727	107.082	149.736	0.763071	0.0398412	female-biased gene
ZNF32	female	male	476.559	328.751	413.213	0.535666	0.000230123	315.068	162.406	249.642	0.956047	0.00257588	female-biased gene
ILKAP	female	male	540.853	354.33	460.915	0.610169	0.00342691	300.626	137.274	230.618	1.13113	0.00442634	female-biased gene
TRAPPC4	female	male	660.617	484.209	585.014	0.448238	0.0124249	534.299	260.262	416.855	1.03842	0.00128556	female-biased gene
GSTO1	female	male	493.479	227.383	379.438	1.11782	2.96404e-15	2279.82	631.035	1573.2	1.85288	1.37248e-06	female-biased gene
HNRNPA3	female	male	7065.61	5799.34	6522.93	0.284932	0.000434742	3451.78	2114.54	2878.67	0.706929	0.0283539	female-biased gene
NDUFA3	female	male	524.448	171.901	373.356	1.60918	3.67539e-22	2118.11	258.654	1321.2	3.03345	3.04587e-21	female-biased gene
RPL37A	female	male	2526.03	974.18	1860.95	1.37462	4.76511e-30	3688.67	550.618	2343.79	2.74405	7.11574e-26	female-biased gene
RHOBTB3	female	male	1131.58	598.122	902.954	0.919784	1.21715e-15	252.892	113.694	193.236	1.1527	8.12883e-05	female-biased gene
IGBP1	female	male	1039	721.351	902.864	0.526411	0.000275952	357.417	191.527	286.321	0.899732	0.00249635	female-biased gene
UGP2	female	male	1570.14	1227.95	1423.49	0.354643	0.025782	3506	2216.49	2953.35	0.6616	0.0138499	female-biased gene
ABCA7	female	male	2060.05	1433.65	1791.6	0.522975	0.000812059	722.317	366.294	569.736	0.979134	0.0102215	female-biased gene
CIRBP	female	male	5438.6	2166.77	4036.39	1.3277	4.65991e-13	371.871	142.36	273.509	1.38318	0.00807941	female-biased gene
NDUFA12	female	male	1116.78	696.208	936.536	0.68173	2.33316e-07	1975.11	553.365	1365.79	1.83545	4.1807e-05	female-biased gene
NDUFS5	female	male	651.5	450.291	565.267	0.532911	0.00362555	1283.12	615.212	996.873	1.06052	2.24797e-05	female-biased gene
TMEM50A	female	male	574.651	375.125	489.14	0.615371	8.95781e-06	230.067	135.317	189.46	0.76405	0.0334782	female-biased gene
CISD1	female	male	1040.03	692.487	891.081	0.58673	5.86968e-08	940.41	314.141	672.009	1.58128	1.61936e-07	female-biased gene
PPP1R35	female	male	107.255	55.154	84.926	0.959615	0.00223517	137.872	60.6829	104.791	1.18188	0.000297591	female-biased gene
RPL11	female	male	1407.97	1177.9	1309.36	0.257397	0.0245259	3350.09	1666.55	2628.57	1.00747	0.000508652	female-biased gene
HEMK1	female	male	257.821	150.193	211.695	0.779471	0.00941926	234.395	95.2441	174.759	1.29978	0.01862	female-biased gene
NDUFA9	female	male	1841.67	984.067	1474.12	0.9042	0.0316136	2862.52	1357.82	2217.65	1.07585	9.4268e-05	female-biased gene
GMNN	female	male	325.788	223.352	281.887	0.544483	0.0111555	162.07	94.8196	133.248	0.773271	0.0316714	female-biased gene
SPCS2	female	male	884.783	664.401	790.333	0.413218	0.0253468	924.85	513.965	748.757	0.848074	0.0320498	female-biased gene
CHURC1	female	male	1770.92	1274.8	1558.3	0.474222	0.0025751	560.021	335.361	463.738	0.739824	0.0215985	female-biased gene
HSD17B8	female	male	102.532	58.8846	83.8258	0.800377	0.0317213	376.695	160.377	283.987	1.23209	0.000120194	female-biased gene
FXYD1	female	male	1332.96	972.59	1178.51	0.454699	0.00886164	1699.24	831.048	1327.16	1.0318	0.00141907	female-biased gene
ERI3	female	male	1104.81	823.815	984.382	0.423444	0.000215076	154.382	69.8853	118.169	1.14478	0.00209842	female-biased gene
ULK3	female	male	681.688	535.902	619.208	0.347214	0.0181411	347.304	147.168	261.532	1.23832	0.000441621	female-biased gene
MRPL42	female	male	262.021	147.065	212.754	0.833191	3.77986e-06	887.467	258.018	617.703	1.78227	7.34118e-06	female-biased gene
KYAT3	female	male	136.241	85.4886	114.49	0.672195	0.00684846	1775.77	765.853	1342.95	1.21315	0.00118979	female-biased gene
BOLA3	female	male	195.894	122.599	164.482	0.676083	0.00566489	447.644	156.055	322.677	1.51943	1.51639e-05	female-biased gene
POP5	female	male	153.627	99.2559	130.325	0.630196	0.00922766	101.194	37.0665	73.7106	1.44962	0.00523523	female-biased gene
MRPL51	female	male	3149.98	2501.69	2872.14	0.332416	0.00871273	1223.62	753.176	1022	0.700343	0.0456738	female-biased gene
HARS2	female	male	707.774	419.007	584.017	0.756314	0.00892117	247.677	127.131	196.014	0.963641	0.00433116	female-biased gene
NUDT5	female	male	189.702	104.193	153.055	0.864502	0.0026245	90.151	36.5594	67.1832	1.3072	0.0242527	female-biased gene
RPL23A	female	male	4458.7	2896.09	3789.01	0.62251	0.000169538	5864.21	2252.15	4316.18	1.38072	1.74609e-05	female-biased gene
TUBGCP5	female	male	817.515	548.628	702.278	0.575378	8.56569e-05	137.801	63.8191	106.094	1.10659	0.0330992	female-biased gene
ELP2	female	male	628.687	502.017	574.4	0.324673	0.0159346	906.665	574.589	764.347	0.657596	0.019521	female-biased gene
RPL31	female	male	1394.2	660.304	1079.67	1.0782	2.02721e-11	2431.82	647.272	1667.02	1.90985	4.17478e-12	female-biased gene
PSMB3	female	male	797.192	561.117	696.017	0.506651	0.000879879	962.85	507.188	767.566	0.92423	0.0114254	female-biased gene
FAM193B	female	male	819.53	650.834	747.231	0.332496	0.0226663	512.459	186.37	372.707	1.4592	0.00193874	female-biased gene
MRPL23	female	male	430.34	297.846	373.557	0.530879	0.00212622	472.744	139.025	329.721	1.76578	3.66598e-05	female-biased gene
TXN	female	male	604.575	335.871	489.416	0.848039	5.58265e-07	2396.31	880.306	1746.59	1.44476	2.19875e-07	female-biased gene
TMEM199	female	male	693.34	459.674	593.197	0.59298	3.20518e-05	301.891	137.598	231.48	1.13459	0.000440511	female-biased gene
YAE1	female	male	531.227	389.865	470.643	0.446411	0.00420244	319.622	172.562	256.596	0.888333	0.0269353	female-biased gene
TAF15	female	male	1648.78	959.441	1353.35	0.781141	3.74448e-17	613.786	378.263	512.847	0.698467	0.00834266	female-biased gene
STX16	female	male	2483.03	1474.69	2050.88	0.751723	2.922e-11	677.627	365.769	543.974	0.88905	0.0228631	female-biased gene
MYL6B	female	male	2831.13	1932.99	2446.21	0.550543	9.59294e-07	2003.08	965.642	1558.47	1.05279	1.22181e-05	female-biased gene
TATDN1	female	male	246.69	117.042	191.126	1.07561	5.74941e-07	211.428	95.8409	161.891	1.14167	0.00295492	female-biased gene
MRPL36	female	male	250.009	175.047	217.883	0.514214	0.0386387	309.282	105.894	222.115	1.54673	5.51894e-08	female-biased gene
COMMD6	female	male	653.72	515.003	594.27	0.344102	0.031922	359.759	154.575	271.823	1.22027	0.00733526	female-biased gene
SEC61B	female	male	153.204	86.7483	124.723	0.820565	0.00101771	700.127	237.371	501.803	1.56106	5.61126e-08	female-biased gene
RBIS	female	male	317.275	147.083	244.335	1.10917	1.40553e-07	273.631	87.0925	193.686	1.65159	4.25991e-07	female-biased gene
MTX2	female	male	523.863	326.936	439.466	0.680144	1.93167e-05	576.061	305.519	460.114	0.91469	0.0123584	female-biased gene
MALSU1	female	male	612.17	440.844	538.744	0.473654	0.00565813	280.046	86.855	197.25	1.68847	3.89219e-07	female-biased gene
SSBP1	female	male	364.816	247.541	314.556	0.559458	0.00248955	188.731	84.7064	144.149	1.1563	0.00104143	female-biased gene
NAGK	female	male	373.228	228.566	311.23	0.707453	0.00348588	257.137	122.663	199.505	1.06893	0.0192306	female-biased gene
TOMM7	female	male	671.151	188.934	464.487	1.8286	5.88726e-19	295.49	57.9837	193.701	2.35183	5.99839e-11	female-biased gene
DMAC1	female	male	249.648	134.183	200.163	0.895557	2.9061e-05	127.657	41.9688	90.9332	1.60505	3.76546e-06	female-biased gene
TXNDC17	female	male	202.285	127.771	170.35	0.662642	0.00469071	2351.68	867.038	1715.4	1.43977	2.28754e-06	female-biased gene
GABARAPL2	female	male	2370.56	1173.68	1857.61	1.01419	1.19489e-15	864.3	364.56	650.126	1.24584	4.41923e-07	female-biased gene
HINT1	female	male	2279.42	1319.83	1868.17	0.788339	2.08721e-13	2591.26	758.802	1805.92	1.77201	2.39659e-16	female-biased gene
ZFP57	female	male	1205.59	934.238	1089.29	0.367834	0.0101464	288.547	139.83	224.811	1.04606	0.0165971	female-biased gene
RPL38	female	male	863.125	478.94	698.474	0.849729	2.74993e-05	1298.36	428.581	925.6	1.59928	8.97537e-07	female-biased gene
PEBP1	female	male	7563.94	6328.75	7034.57	0.257222	0.00356187	2940.3	1811.07	2456.34	0.699045	0.0456738	female-biased gene
CEBPZOS	female	male	232.724	105.139	178.045	1.1462	0.0136515	256.794	54.6491	170.161	2.2333	0.00164411	female-biased gene
JRKL	female	male	127.677	64.6705	100.674	0.981462	0.000852888	47.1529	20.8599	35.8845	1.17185	0.0246473	female-biased gene
TMEM208	female	male	222.564	153.883	193.13	0.532471	0.0400785	383.796	199.034	304.613	0.948053	0.00102212	female-biased gene
HNRNPA1	female	male	3640.99	2677.51	3228.07	0.443453	0.000618316	1455.02	887.59	1211.84	0.712827	0.0148132	female-biased gene
ZNF658	female	male	629.382	510.879	578.595	0.300942	0.0417802	232.522	132.685	189.735	0.807981	0.0454832	female-biased gene
RPL37	female	male	1554.86	817.423	1238.82	0.927596	2.93091e-08	2824.99	999.655	2042.7	1.49895	3.54293e-10	female-biased gene
ATP5IF1	female	male	1634.19	1248.37	1468.84	0.388501	0.00817006	1334.88	641.614	1037.76	1.05649	0.0223629	female-biased gene
GOLT1B	female	male	310.574	190.886	259.279	0.702363	0.000156914	189.807	86.7455	145.638	1.13068	0.000834065	female-biased gene
FAM92A	female	male	1353.15	872.148	1147	0.633672	4.06934e-05	229.29	95.9737	172.154	1.25519	0.0421192	female-biased gene
TMEM147	female	male	1047.48	665.567	883.805	0.654296	2.70628e-08	631.063	233.465	460.664	1.43394	4.8234e-05	female-biased gene
CDKL1	female	male	496.96	334.656	427.401	0.57054	0.0147274	75.9406	24.5713	53.9252	1.62644	0.0257641	female-biased gene
C2ORF49	female	male	1003.47	737.685	889.56	0.443991	0.00261034	238.63	124.996	189.929	0.933662	0.00675048	female-biased gene
RCN2	female	male	1522.5	930.522	1268.79	0.710323	7.87238e-11	523.374	294.76	425.397	0.829426	0.0374041	female-biased gene
TRMT61A	female	male	627.037	489.094	567.918	0.358393	0.00636147	137.953	75.2817	111.094	0.871377	0.0226577	female-biased gene
FBXO10	female	male	1132.87	855.919	1014.18	0.404419	0.000162682	400.941	190.546	310.772	1.07283	0.000123038	female-biased gene
UQCRH	female	male	2078.43	1347.68	1765.25	0.624999	3.45611e-07	3705.12	1644.11	2821.83	1.17216	2.73031e-07	female-biased gene
VDAC2	female	male	2951.66	2211.05	2634.25	0.416778	2.88147e-05	1087.77	664.054	906.175	0.711711	0.0124181	female-biased gene
ZPBP	female	male	149.669	70.1293	115.581	1.09351	0.000116475	52.3366	19.6462	38.3264	1.41206	0.0267477	female-biased gene
CDK10	female	male	682.296	546.942	624.287	0.319063	0.0289537	278.182	159.146	227.166	0.805836	0.03222	female-biased gene
CEP20	female	male	229.983	143.434	192.891	0.681196	0.00172802	201.492	78.4041	148.74	1.36004	0.0226056	female-biased gene
CCDC9	female	male	528.138	326.761	441.834	0.692646	0.0121853	310.466	183.549	256.073	0.758634	0.0354746	female-biased gene
UBC	female	male	2460.61	830.402	1761.95	1.56712	0.000110508	1810.43	628.028	1303.68	1.52691	8.43691e-08	female-biased gene
DPCD	female	male	668.378	307.035	513.517	1.12223	8.17494e-11	129.751	45.9476	93.8354	1.49803	0.000241528	female-biased gene
TRIM68	female	male	478.124	268.292	388.196	0.833613	0.0098142	155.765	68.1898	118.233	1.19314	0.00254813	female-biased gene
L3MBTL1	female	male	620.879	366.694	511.942	0.759716	8.88303e-08	56.7376	16.9919	39.7037	1.73685	0.0371307	female-biased gene
ATP5MD	female	male	1422.23	292.297	937.973	2.28258	7.5213e-70	2263.92	345.083	1441.56	2.71337	3.49927e-30	female-biased gene
ATP5MC3	female	male	2514.62	1318.6	2002.04	0.931323	3.74448e-17	6112.63	2285.52	4472.44	1.41917	8.89025e-10	female-biased gene
RPS27	female	male	1626.76	789.071	1267.75	1.04381	6.03426e-14	2484.25	667.252	1705.54	1.89663	3.2615e-11	female-biased gene
SNRPD2	female	male	425.513	147.407	306.325	1.52945	6.46086e-23	405.006	102.934	275.546	1.97572	9.56275e-12	female-biased gene
CHD8	female	male	2704.34	3448.96	3023.46	-0.350887	0.00922766	602.25	944.077	748.747	-0.649245	0.0354655	male-biased gene
MBNL2	female	male	3056.08	3835.57	3390.15	-0.327751	0.00261737	1083.7	1943.13	1452.03	-0.842238	0.0159575	male-biased gene
ATP13A1	female	male	738.908	1127.95	905.64	-0.610222	4.65982e-09	620.679	1020.24	791.918	-0.716831	0.0211321	male-biased gene
ILRUN	female	male	4618.3	5417	4960.6	-0.230141	0.0288645	4258.77	6369.33	5163.3	-0.580641	0.0347859	male-biased gene
AXIN1	female	male	411.329	514.466	455.53	-0.322895	0.0254647	285.942	501.357	378.263	-0.809474	0.0499273	male-biased gene
MITF	female	male	300.752	412.404	348.603	-0.455539	0.00875479	122.288	249.877	176.969	-1.03267	0.000791024	male-biased gene
CLUH	female	male	1449.74	1943.36	1661.29	-0.422786	0.000542163	2169.15	4098.39	2995.97	-0.918053	0.00153336	male-biased gene
TMCC3	female	male	281.767	478.851	366.232	-0.765266	3.99695e-07	185.098	363.393	261.51	-0.972929	0.0171512	male-biased gene
TUBB5	female	male	4104.87	6413.7	5094.37	-0.643823	6.74988e-07	485.474	838.3	636.685	-0.787637	0.0465544	male-biased gene
TOB2	female	male	1350.73	1947.07	1606.3	-0.527533	6.52232e-05	1338.98	2462.97	1820.69	-0.879433	0.0152655	male-biased gene
SPECC1L	female	male	1298.58	1566.74	1413.5	-0.27087	0.0259455	410.371	705.097	536.682	-0.78198	0.02331	male-biased gene
SSH2	female	male	963.5	1198.4	1064.17	-0.31474	0.0313126	364.644	691.397	504.681	-0.924429	0.00357062	male-biased gene
MSN	female	male	732.533	1105.73	892.473	-0.594081	8.46034e-08	579.06	1039.31	776.31	-0.844088	0.0054635	male-biased gene
MED13L	female	male	2461.07	3359.75	2846.22	-0.449063	0.000578521	838.41	1789.14	1245.87	-1.09385	0.0233233	male-biased gene
NFIA	female	male	846.488	2138.6	1400.25	-1.33711	7.78218e-25	1113.15	1766.3	1393.07	-0.665975	0.017442	male-biased gene
S1PR2	female	male	131.756	200.12	161.055	-0.603177	0.0118525	143.005	328.782	222.624	-1.20022	0.0153598	male-biased gene
MAP3K5	female	male	1876.19	2290.75	2053.86	-0.287997	0.039451	278.656	548.932	394.489	-0.97736	0.0193616	male-biased gene
FOXK2	female	male	1454.82	2017.27	1695.87	-0.471541	0.000417212	309.477	606.316	436.694	-0.969674	0.0250907	male-biased gene
NCOR2	female	male	3287.22	4229.37	3691	-0.363585	0.00709963	895.695	1637.94	1213.8	-0.870795	0.00157202	male-biased gene
ZBTB38	female	male	2974.82	3703.2	3286.98	-0.315963	0.0194508	564.54	976.148	740.944	-0.789922	0.012755	male-biased gene
AKIRIN2	female	male	1058.86	1771.03	1364.08	-0.74205	7.03823e-16	357.122	556.018	442.363	-0.63822	0.0365534	male-biased gene
FBXO11	female	male	2281.85	2966.88	2575.43	-0.378753	0.00152556	357.368	614.42	467.533	-0.782142	0.0308029	male-biased gene
WDR1	female	male	2218.68	2945.65	2530.24	-0.408919	0.00015102	750.936	1600.66	1115.1	-1.0919	0.00820138	male-biased gene
RNASEK	female	male	790.651	2337.15	1453.44	-1.56365	6.51022e-29	275.258	642.199	432.518	-1.2227	4.59246e-06	male-biased gene
ZNF574	female	male	416.699	816.119	587.879	-0.969894	7.71423e-14	90.3167	155.891	118.42	-0.786357	0.0233179	male-biased gene
CEP170B	female	male	4234.97	5785.61	4899.53	-0.450115	9.29629e-05	291.499	542.302	398.986	-0.895397	0.0320498	male-biased gene
SERPING1	female	male	406.773	622.565	499.255	-0.614033	0.0104442	24730.1	45473.3	33620.1	-0.87874	0.00189879	male-biased gene
INTS1	female	male	2327.87	3990.29	3040.34	-0.777521	1.66004e-14	620.057	1154.33	849.032	-0.896164	0.00188367	male-biased gene
SEC14L1	female	male	2365.98	3007.07	2640.73	-0.345959	0.00457305	326.117	535.778	415.972	-0.71633	0.0138097	male-biased gene
MYH9	female	male	1269.73	1596.27	1409.68	-0.330241	0.00483081	2686.17	5077.39	3710.98	-0.918575	0.00528284	male-biased gene
MEF2A	female	male	2384.87	3542.93	2881.18	-0.571037	0.000176996	316.32	552.355	417.477	-0.805264	0.00495338	male-biased gene
POGZ	female	male	574.759	784.117	664.484	-0.448065	0.0095176	75.3399	139.178	102.699	-0.883533	0.0316714	male-biased gene
SPTBN1	female	male	14677.4	20599.7	17215.5	-0.489028	4.39148e-05	2106.68	3496.27	2702.22	-0.730747	0.0228246	male-biased gene
DHX33	female	male	732.697	926.048	815.562	-0.337754	0.0161503	184.995	365.817	262.49	-0.983879	0.0299114	male-biased gene
LRRC8A	female	male	2021.85	2620.7	2278.5	-0.374311	0.00116674	1283.43	2054.9	1614.06	-0.678955	0.0256636	male-biased gene
GATAD2A	female	male	554.494	1014.5	751.642	-0.871648	1.38457e-13	664.251	1459.48	1005.07	-1.13559	8.46698e-05	male-biased gene
EFTUD2	female	male	1401.59	1737.94	1545.74	-0.310297	0.00473833	379.257	568.702	460.448	-0.585128	0.0473916	male-biased gene
USP32	female	male	2589.44	3399.84	2936.76	-0.392828	2.33648e-05	487.457	1064.8	734.888	-1.12771	0.00311135	male-biased gene
MAN2B1	female	male	695.458	906.075	785.723	-0.381661	0.00534687	1086.84	1511.83	1268.98	-0.476327	0.0353546	male-biased gene
TECR	female	male	1239.69	2299.16	1693.75	-0.891132	1.7833e-11	1564.96	2473.63	1954.39	-0.660461	0.00675048	male-biased gene
PRKCD	female	male	377.5	642.135	490.915	-0.766463	0.000245155	189.666	354.25	260.202	-0.903373	0.0114091	male-biased gene
SELENOP	female	male	1100.36	1667.97	1343.62	-0.600157	0.0144449	23986.7	40243.3	30953.9	-0.746534	0.0217007	male-biased gene
TP53INP2	female	male	2705.82	3825.17	3185.54	-0.499476	0.000142004	394.699	729.841	538.331	-0.887432	0.00258842	male-biased gene
STK40	female	male	592.482	827.536	693.219	-0.482087	0.00156111	836.073	1984.73	1328.35	-1.24706	0.028876	male-biased gene
BCL9L	female	male	1158.72	1722.31	1400.26	-0.571799	0.00199724	323.637	753.832	508.006	-1.22047	0.00236387	male-biased gene
EGR1	female	male	449.523	794.543	597.388	-0.821646	0.00949	44.9541	377.575	187.506	-3.06701	3.17052e-05	male-biased gene
MT-ND2	female	male	5001.83	14794.3	9198.59	-1.56452	4.2435e-33	10143.2	25449.3	16703	-1.32712	2.32517e-06	male-biased gene
YIPF2	female	male	428.608	709.968	549.191	-0.728211	2.64113e-07	206.27	367.869	275.527	-0.83497	0.0397086	male-biased gene
ASH1L	female	male	6794.59	8347.82	7460.26	-0.297016	0.0160749	1032.84	1721.99	1328.19	-0.737627	0.00914708	male-biased gene
CC2D1A	female	male	1257.6	1645.13	1423.68	-0.387513	0.000635025	135.115	217.315	170.344	-0.685397	0.0477552	male-biased gene
NFE2L2	female	male	306.921	490.847	385.746	-0.677507	0.0001721	251.052	468.983	344.451	-0.900937	0.0266974	male-biased gene
ARIH2	female	male	1337.53	1659.19	1475.38	-0.310901	0.0116132	976.285	1610.2	1247.96	-0.722244	0.0355147	male-biased gene
USP54	female	male	2920.2	3823.7	3307.41	-0.388925	0.00405316	187.025	385.463	272.07	-1.04413	0.0437742	male-biased gene
HUWE1	female	male	4810.38	6417.67	5499.22	-0.415899	9.17566e-05	2053.77	4475.65	3091.72	-1.12392	0.000953556	male-biased gene
PAXIP1	female	male	551.035	673.934	603.706	-0.290402	0.035256	237.676	415.574	313.918	-0.804835	0.0210858	male-biased gene
FLOT2	female	male	1548.19	2040.03	1758.98	-0.398027	5.12366e-05	584.258	1205.89	850.672	-1.04511	0.0377258	male-biased gene
ART2	female	male	18.7694	45.0858	30.0478	-1.26334	0.04769	20.7012	67.759	40.8688	-1.71072	0.0296693	male-biased gene
BRD4	female	male	2147.8	2587.1	2336.07	-0.268491	0.0236563	649.945	1060.22	825.776	-0.706107	0.028323	male-biased gene
DYNLL2	female	male	3386.53	4210.43	3739.63	-0.314181	0.00640731	776.828	1492.99	1083.76	-0.942243	0.00685182	male-biased gene
UBTD1	female	male	129.354	180.848	151.423	-0.483543	0.041325	311.454	647.395	455.428	-1.05646	0.00265471	male-biased gene
TOR1AIP1	female	male	1274.1	1598.4	1413.09	-0.327129	0.0113275	630.219	1048.56	809.508	-0.733973	0.00593006	male-biased gene
TNRC18	female	male	1885.11	2441.08	2123.38	-0.372863	0.0181491	543.822	1048.91	760.289	-0.948071	0.000196161	male-biased gene
ZFHX4	female	male	332.365	501.94	405.04	-0.59469	0.0253468	27.0147	67.0944	44.1917	-1.3141	0.0130266	male-biased gene
ZNF236	female	male	591.183	732.34	651.679	-0.308843	0.0368561	145.701	235.392	184.14	-0.691611	0.0410452	male-biased gene
AP2A1	female	male	4205.85	7205.42	5491.38	-0.776701	2.57677e-19	797.778	1677.12	1174.64	-1.07193	0.00249635	male-biased gene
ZFP36	female	male	42.3719	85.7567	60.9654	-1.01705	0.00819375	331.482	1222.67	713.421	-1.88284	0.00463121	male-biased gene
ZYX	female	male	530.526	744.466	622.214	-0.488726	0.016045	362.256	628.36	476.301	-0.794832	0.0281552	male-biased gene
AGO2	female	male	711.961	934.201	807.207	-0.39195	0.0293621	377.155	599.877	472.607	-0.66988	0.0337324	male-biased gene
CREBBP	female	male	2020.26	3388.15	2606.5	-0.745965	3.54999e-11	550.893	1314.9	878.323	-1.25569	0.000530434	male-biased gene
SDC4	female	male	1502.29	2361.15	1870.37	-0.65235	0.00179431	893.693	6322.4	3220.28	-2.8226	1.52871e-06	male-biased gene
TAB2	female	male	577.018	770.597	659.981	-0.417354	0.00068126	835.532	1875.7	1281.32	-1.16657	0.000247975	male-biased gene
SNRPC	female	male	178.641	371.688	261.375	-1.05719	1.25639e-10	227.999	388.312	296.704	-0.767409	0.0341976	male-biased gene
UBALD1	female	male	1061.73	1324.25	1174.24	-0.318752	0.0116807	231.365	455.211	327.299	-0.976028	0.0246568	male-biased gene
PRKAR1A	female	male	6833.18	7953.75	7313.42	-0.219077	0.029598	845.268	1281.39	1032.18	-0.599975	0.0477552	male-biased gene
ATP6AP1	female	male	3256.06	5237.16	4105.11	-0.68566	1.44518e-19	483.433	749.776	597.58	-0.632665	0.0287279	male-biased gene
IL13RA1	female	male	227.639	312.829	264.149	-0.4587	0.0316362	1255.88	2368.13	1732.56	-0.915064	0.0475072	male-biased gene
MT-ND4	female	male	118.261	935.082	468.327	-2.98335	9.52884e-39	120.8	968.903	484.273	-3.00208	2.43799e-28	male-biased gene
DUSP1	female	male	887.919	1701.96	1236.79	-0.938677	1.15124e-05	472.541	1105.55	743.83	-1.22649	0.0134274	male-biased gene
EIF5A	female	male	1579.97	2645.49	2036.62	-0.743666	1.18028e-10	1762.93	3157.69	2360.68	-0.840843	0.0208961	male-biased gene
MAP1A	female	male	35995.4	43998	39425.1	-0.289626	0.00424432	43.0496	117.134	74.7998	-1.44437	0.0149201	male-biased gene
IER5L	female	male	153.314	258.03	198.192	-0.750907	0.00553873	24.9917	70.128	44.3358	-1.49018	0.00934261	male-biased gene
ANKRD17	female	male	2867.22	3387.72	3090.29	-0.240662	0.0170704	797.844	1483.9	1091.87	-0.895557	0.00868463	male-biased gene
GRK2	female	male	4451.74	6805.2	5460.37	-0.612277	7.06731e-15	465.31	783.211	601.553	-0.751168	0.0079571	male-biased gene
THAP5	female	male	1086.73	1472.09	1251.89	-0.437846	0.00184974	379.245	677.991	507.279	-0.837675	0.0292167	male-biased gene
NOTCH2	female	male	1223.91	1721.44	1437.14	-0.492092	0.00194454	615.994	1256.85	890.646	-1.02853	0.00467659	male-biased gene
SULF2	female	male	1295.27	1844.67	1530.73	-0.510137	9.59294e-07	1184.55	2379.03	1696.47	-1.00634	0.0356557	male-biased gene
MEX3D	female	male	233.627	475.019	337.081	-1.02366	6.76598e-12	133.154	296.514	203.166	-1.15613	0.000539148	male-biased gene
SIN3A	female	male	1096.48	1382.32	1218.98	-0.33418	0.00434706	382.296	719.242	526.701	-0.911634	0.00430494	male-biased gene
FAM107B	female	male	764.856	1024.4	876.09	-0.421535	0.0142312	1560.39	4778.13	2939.42	-1.61453	0.00206746	male-biased gene
CCNYL1	female	male	166.641	229.532	193.594	-0.461897	0.0209804	84.0988	159.04	116.217	-0.916354	0.0131523	male-biased gene
HMBOX1	female	male	1395.77	2157.5	1722.23	-0.628344	1.85244e-05	398.895	676.222	517.75	-0.761782	0.00685182	male-biased gene
CLMN	female	male	801.406	1207.89	975.614	-0.591876	1.05155e-05	549.403	1024.51	753.021	-0.899255	0.00171498	male-biased gene
PPP1R10	female	male	1223.01	1671.03	1415.02	-0.450382	0.000118056	292.763	702.046	468.17	-1.26089	0.0314061	male-biased gene
TRIB1	female	male	142.794	214.087	173.348	-0.584325	0.020529	459.334	1289.24	815.008	-1.48867	0.0316798	male-biased gene
TJP1	female	male	1428.83	2036.45	1689.24	-0.511225	1.5188e-07	324.713	643.482	461.329	-0.987665	0.00011877	male-biased gene
USP53	female	male	445.792	589.513	507.386	-0.403109	0.0199645	194.719	346.433	259.739	-0.831066	0.0255911	male-biased gene
RALGDS	female	male	1070.6	1349.9	1190.3	-0.334419	0.00337517	201.222	336.65	259.262	-0.743265	0.00508743	male-biased gene
PHF12	female	male	908.292	1233.9	1047.84	-0.442008	0.000419801	238.421	366.082	293.133	-0.618533	0.0428778	male-biased gene
SREBF2	female	male	2640.84	3795.34	3135.63	-0.523245	1.0551e-06	1081.2	1993.64	1472.24	-0.882723	0.0296693	male-biased gene
TMEM259	female	male	1552.92	2966.4	2158.7	-0.933759	1.62209e-23	1629.82	3044.54	2236.12	-0.901432	0.00110973	male-biased gene
DAG1	female	male	1450	1867.21	1628.8	-0.364872	0.0185748	329.155	510.427	406.843	-0.633762	0.0457834	male-biased gene
TMEM63B	female	male	1423.2	1688.6	1536.94	-0.246696	0.034711	317.493	647.459	458.907	-1.02902	0.00118356	male-biased gene
ARID1B	female	male	1673.15	2370.49	1972.01	-0.50264	0.000219481	330.149	679.521	479.88	-1.04151	9.24565e-05	male-biased gene
LRP10	female	male	273.73	437.57	343.947	-0.676808	1.6144e-05	742.947	1368.82	1011.18	-0.881719	0.0054176	male-biased gene
MT-ND6	female	male	48.7011	367.387	185.281	-2.9146	4.24391e-41	72.3226	468.917	242.292	-2.69707	2.93057e-21	male-biased gene
ARID2	female	male	625.138	865.809	728.283	-0.4698	0.000655804	181.608	335.568	247.591	-0.886543	0.00407448	male-biased gene
CTNNA3	female	male	158.634	255.66	200.217	-0.688767	0.0090481	15.7927	39.5195	25.9613	-1.31743	0.0307568	male-biased gene
GAB2	female	male	312.141	463.373	376.954	-0.57014	0.00767475	39.8173	85.8773	59.5573	-1.11071	0.0110275	male-biased gene
MT-ND1	female	male	1481.1	4289.83	2684.85	-1.53429	9.31115e-30	2571.29	5003.82	3613.8	-0.960567	0.00914708	male-biased gene
SH3GL1	female	male	432.137	573.394	492.675	-0.408018	0.00844975	265.248	507.652	369.136	-0.93656	0.0226295	male-biased gene
TMEM184B	female	male	1551.05	2135.27	1801.43	-0.461183	6.40159e-07	211.511	401.618	292.985	-0.92457	0.0016876	male-biased gene
GSK3B	female	male	3610.87	4491.08	3988.11	-0.314719	0.0118129	435.045	665.803	533.942	-0.614226	0.0207658	male-biased gene
KIF5C	female	male	18620.8	22592.5	20323	-0.278927	0.00613057	32.0098	114.347	67.2972	-1.83758	0.00437182	male-biased gene
WWP1	female	male	1095.97	1490.44	1265.03	-0.443556	7.70456e-05	809.181	1343.6	1038.22	-0.731704	0.014758	male-biased gene
NCOA6	female	male	1455.47	2005.91	1691.37	-0.46276	0.000949936	427.016	792.664	583.722	-0.893421	0.00568692	male-biased gene
ZSWIM4	female	male	276.55	421.875	338.832	-0.609244	0.0001273	62.0504	136.069	93.7727	-1.13188	0.0166671	male-biased gene
MCCC2	female	male	930.986	1389.89	1127.66	-0.578204	0.00106902	947.422	1578.28	1217.79	-0.736758	0.0169622	male-biased gene
KDM3B	female	male	2487.78	2907.95	2667.86	-0.225137	0.0280462	464.477	738.57	581.945	-0.669596	0.026683	male-biased gene
MVP	female	male	3045.64	4960.14	3866.14	-0.703621	3.22541e-10	691.096	1436.14	1010.4	-1.05492	0.0120801	male-biased gene
UBE2QL1	female	male	2058.83	3310.31	2595.18	-0.685145	1.71353e-11	74.7216	247.375	148.716	-1.72731	0.00980395	male-biased gene
ZCCHC14	female	male	482.423	794.413	616.133	-0.719619	0.00548172	67.9511	196.207	122.918	-1.53295	0.000499273	male-biased gene
TNRC6B	female	male	572.016	894.334	710.152	-0.644716	0.0150993	145.708	416.786	261.884	-1.51746	0.000445602	male-biased gene
PHLPP1	female	male	1160.84	1511.94	1311.32	-0.381252	0.00247713	216.321	385.111	288.66	-0.83211	0.0370698	male-biased gene
VNN3	female	male	15.1314	71.0231	39.0849	-2.2315	0.000679936	1842.88	12753.2	6518.75	-2.7909	0.00700021	male-biased gene
PPARD	female	male	542.444	832.47	666.741	-0.617887	0.000457884	51.2373	126.355	83.4306	-1.3019	0.007921	male-biased gene
NPAS2	female	male	791.842	1331.58	1023.16	-0.749841	1.82323e-11	40.1419	306.351	154.231	-2.93852	1.59954e-05	male-biased gene
PTPN23	female	male	878.139	1168.94	1002.77	-0.412656	0.00218008	242.098	446.73	329.798	-0.884592	0.00827844	male-biased gene
THOC3	female	male	635.54	834.795	720.935	-0.393413	0.0288507	567.007	887.138	704.206	-0.646274	0.0203534	male-biased gene
MOB3A	female	male	226.609	330.992	271.345	-0.546659	0.00543657	155.135	258.368	199.378	-0.734365	0.0452173	male-biased gene
NAPA	female	male	2094.51	3865.67	2853.58	-0.884121	3.64953e-25	997.623	1715.55	1305.31	-0.782123	0.000506183	male-biased gene
PLBD2	female	male	1081.19	1641.07	1321.14	-0.602041	9.27769e-08	1932.91	3942.95	2794.36	-1.02857	0.00110308	male-biased gene
FOSL2	female	male	674.093	971.712	801.644	-0.527599	0.0408486	113.239	396.439	234.61	-1.80713	2.63903e-05	male-biased gene
SRCAP	female	male	1968.94	2712.64	2287.67	-0.46229	0.000201792	574.878	947.175	734.434	-0.72059	0.01862	male-biased gene
GIT1	female	male	2356.71	3650.59	2911.23	-0.631352	4.08933e-15	195.044	416.538	289.97	-1.09358	0.000289855	male-biased gene
CAMKMT	female	male	90.7982	152.553	117.265	-0.748346	0.0112573	44.7518	128.768	80.7585	-1.52509	0.012197	male-biased gene
PPP1R15A	female	male	1303.8	1574.4	1419.77	-0.27204	0.0217182	534.143	952.032	713.239	-0.833782	0.0491342	male-biased gene
TBL1X	female	male	1114.42	1924.42	1461.56	-0.788118	3.49386e-12	491.287	1003.74	710.91	-1.03056	0.00357876	male-biased gene
EEF2	female	male	18279.4	31312.4	23865	-0.776524	3.98923e-24	17839.2	28365.6	22350.5	-0.669089	0.0136603	male-biased gene
FBXO34	female	male	1358.66	1730.88	1518.18	-0.349343	0.0171026	276.939	474.679	361.685	-0.777605	0.0295509	male-biased gene
CARM1	female	male	567.949	775.058	656.71	-0.448467	0.000388246	117.263	203.362	154.163	-0.792922	0.0114395	male-biased gene
PML	female	male	491.995	590.17	534.07	-0.262479	0.0474491	193.512	408.693	285.733	-1.07774	0.00779589	male-biased gene
MYH14	female	male	2738.01	3735.38	3165.45	-0.448126	0.0119998	1456.64	2856.15	2056.43	-0.971423	0.00726434	male-biased gene
SAP130	female	male	809.68	1000.49	891.456	-0.305215	0.0207674	253.75	493.862	356.655	-0.962103	0.00189095	male-biased gene
DVL3	female	male	977.792	1421.99	1168.16	-0.540317	3.8038e-05	328.733	587.952	439.827	-0.838743	0.0387354	male-biased gene
TRAPPC12	female	male	1500.74	2187.17	1794.92	-0.543371	0.000447093	431.839	804.002	591.337	-0.896716	0.0285884	male-biased gene
XPO6	female	male	1512.6	1961.28	1704.89	-0.374742	0.000206239	939.608	3123.7	1875.65	-1.73305	0.0140999	male-biased gene
ANGPTL4	female	male	2233.54	3782.73	2897.48	-0.760114	5.08201e-11	1013.38	1863.54	1377.74	-0.878594	0.00642027	male-biased gene
UBN1	female	male	1463.94	1779.35	1599.12	-0.281486	0.0199645	544.892	963.867	724.453	-0.822496	0.0232529	male-biased gene
DUSP6	female	male	439.666	756.923	575.633	-0.78378	0.00210032	407.239	1208.57	750.665	-1.56899	0.00311135	male-biased gene
FOXN3	female	male	1196.44	1870.13	1485.16	-0.64438	0.000235221	707.588	1114.63	882.034	-0.655587	0.0334442	male-biased gene
LRP1	female	male	11562.2	16822.7	13816.7	-0.54099	1.07915e-06	15049.3	35551.7	23836.1	-1.24022	0.0119796	male-biased gene
NFIX	female	male	1674.14	2535.15	2043.14	-0.598648	0.00225609	177.464	373.246	261.371	-1.07196	0.0464794	male-biased gene
CADM3	female	male	12521.4	16517.8	14234.2	-0.399633	2.73955e-06	196.061	541.405	344.065	-1.46564	3.29625e-05	male-biased gene
PTBP3	female	male	398.98	500.82	442.626	-0.327905	0.0460361	707.761	1282.6	954.119	-0.857688	0.00181577	male-biased gene
ATG2A	female	male	1148.91	1416.49	1263.59	-0.302093	0.0244521	929.212	1761.93	1286.09	-0.923068	0.0417885	male-biased gene
TPP1	female	male	2385.49	3595.27	2903.97	-0.591829	2.2041e-12	951.156	1721.13	1281.15	-0.855678	0.00464922	male-biased gene
AKT2	female	male	966.567	1349.86	1130.84	-0.48182	0.000890686	986.674	1649.33	1270.67	-0.741127	0.00697565	male-biased gene
DAZAP2	female	male	1580.24	2349.05	1909.73	-0.571955	0.00334788	1027.21	1502.05	1230.72	-0.548335	0.0283539	male-biased gene
ARHGAP1	female	male	1306.08	1785.61	1511.59	-0.451152	0.000144783	439.548	1216.3	772.44	-1.46816	0.0130266	male-biased gene
CLASP1	female	male	3125.11	4122.23	3552.45	-0.39952	0.000285703	233.482	338.365	278.432	-0.53533	0.0421192	male-biased gene
MXI1	female	male	1525.09	1818.92	1651.02	-0.254148	0.0466176	132.184	238.11	177.581	-0.849639	0.0155473	male-biased gene
CIC	female	male	3016.48	4341.89	3584.51	-0.525464	1.9274e-05	481.336	937.628	676.889	-0.961772	0.00928096	male-biased gene
BCR	female	male	1843.54	2366.39	2067.62	-0.360215	0.00220157	294.293	596.853	423.961	-1.01941	0.000202667	male-biased gene
ZFP36L1	female	male	615.1	832.412	708.234	-0.436534	0.0101384	986.487	2394.18	1589.78	-1.27901	0.00471727	male-biased gene
PPME1	female	male	2711.22	4515.34	3484.41	-0.735903	6.04852e-14	225.022	382.106	292.344	-0.763177	0.0134274	male-biased gene
HTT	female	male	4618.85	5796.47	5123.54	-0.327644	0.000633007	356.78	601.765	461.774	-0.75446	0.00658806	male-biased gene
FAIM2	female	male	17460.8	25733.6	21006.3	-0.559529	2.14665e-13	15.8433	53.4991	31.9815	-1.75626	0.0138097	male-biased gene
SKI	female	male	3662.97	4823.96	4160.54	-0.397191	0.0144963	826.616	1256.58	1010.89	-0.603928	0.0147729	male-biased gene
TRAF4	female	male	133.823	225.496	173.112	-0.752889	0.000226281	710.523	1134.9	892.401	-0.675227	0.0495612	male-biased gene
APOD	female	male	2800.03	3947.4	3291.76	-0.495476	0.0109323	34.4879	79.1549	53.6309	-1.19559	0.0418079	male-biased gene
CPEB4	female	male	2829.11	3756.86	3226.72	-0.409169	0.0228852	1298.32	2983.03	2020.34	-1.20024	0.00764675	male-biased gene
PHF2	female	male	1005.43	1458.55	1199.63	-0.536783	0.000145492	143.27	237.276	183.558	-0.730298	0.0229557	male-biased gene
ABL1	female	male	1019.66	1347.53	1160.18	-0.402231	0.000402664	401.322	1471.71	860.062	-1.87439	9.77498e-08	male-biased gene
MSI2	female	male	2140.64	2953.16	2488.86	-0.46421	5.58493e-05	414.182	622.15	503.311	-0.58763	0.0349069	male-biased gene
ELMO1	female	male	2569.08	3690.76	3049.8	-0.522666	0.000942958	41.1998	85.2456	60.0766	-1.05027	0.0356566	male-biased gene
IL6ST	female	male	2368.45	2786.42	2547.58	-0.234505	0.040793	2191.15	5179.74	3471.98	-1.24126	1.86965e-05	male-biased gene
SHB	female	male	227.174	318.455	266.294	-0.48737	0.033132	360.987	1195.12	718.474	-1.72723	0.010513	male-biased gene
CHST7	female	male	76.8796	114.609	93.0492	-0.576276	0.0483228	116.667	199.996	152.379	-0.777969	0.0406527	male-biased gene
PAFAH1B2	female	male	3696.88	4304.8	3957.42	-0.219643	0.0140237	508.384	829.453	645.985	-0.705608	0.0434925	male-biased gene
TRIOBP	female	male	110.219	199.785	148.605	-0.858083	0.00185017	147.016	264.643	197.427	-0.848152	0.0422058	male-biased gene
UBAP2L	female	male	1753.22	2500.1	2073.31	-0.511976	7.33006e-08	480.521	822.019	626.877	-0.77421	0.00923696	male-biased gene
ABCB4	female	male	566.588	795.955	664.888	-0.490293	0.000233091	3124.78	5784.93	4264.84	-0.888608	0.0206322	male-biased gene
TMEM97	female	male	69.7094	146.568	102.649	-1.07217	0.00138673	457.994	926.183	658.647	-1.01615	0.000508652	male-biased gene
HIF1A	female	male	2530.69	3507.86	2949.47	-0.471081	8.90079e-06	616.126	1005.85	783.15	-0.707016	0.0290428	male-biased gene
PEDS1	female	male	545.572	1159.63	808.74	-1.08783	2.13302e-16	103.228	205.434	147.031	-0.992125	0.0120179	male-biased gene
BAP1	female	male	2687.94	3549.65	3057.24	-0.401175	2.64305e-06	739.266	1165.34	921.871	-0.65655	0.0267621	male-biased gene
TNIP1	female	male	509.262	789.429	629.334	-0.632402	7.68966e-07	1210.44	2003.57	1550.35	-0.727276	0.014748	male-biased gene
MIDEAS	female	male	7589.41	9430.58	8378.48	-0.313359	0.00169162	221.558	375.227	287.416	-0.760401	0.0354381	male-biased gene
NCKIPSD	female	male	1334.74	2267.64	1734.55	-0.764653	2.31187e-11	263.759	460.388	348.029	-0.803778	0.035064	male-biased gene
WSCD2	female	male	3040.04	4169.13	3523.94	-0.455662	0.00999423	80.7189	148.135	109.611	-0.875335	0.0360574	male-biased gene
SDC3	female	male	4023.69	6014.75	4877	-0.580008	1.03271e-05	232.65	547.414	367.549	-1.23538	0.000545854	male-biased gene
INPP5D	female	male	430.57	663.478	530.388	-0.623935	9.07318e-05	117.576	220.716	161.779	-0.9083	0.0163729	male-biased gene
ACER2	female	male	667.47	897.552	766.077	-0.427248	0.0142376	1204.67	4276.64	2521.23	-1.82804	0.000146138	male-biased gene
ACTB	female	male	11892.7	15647.7	13502	-0.395883	2.50156e-05	4941.58	7699.06	6123.36	-0.639747	0.0434497	male-biased gene
UBE2Z	female	male	517.949	645.355	572.552	-0.317264	0.0387481	128.672	323.579	212.204	-1.33051	0.00923696	male-biased gene
B4GALT3	female	male	297.705	489.032	379.702	-0.715927	1.52753e-07	158.539	281.679	211.313	-0.827616	0.00531582	male-biased gene
PPP2R5D	female	male	1652.52	2279.01	1921.02	-0.463764	5.69595e-06	277.804	461.346	356.465	-0.732371	0.0281552	male-biased gene
ZFAND5	female	male	3265.51	3841.84	3512.51	-0.234489	0.0114809	617.871	1009.1	785.542	-0.708176	0.0144274	male-biased gene
BCL7B	female	male	574.525	807.594	674.412	-0.491238	0.00653264	273.45	437.652	343.822	-0.678897	0.0332499	male-biased gene
RAPGEF2	female	male	3221.17	3963.28	3539.22	-0.299116	0.0186371	473.617	974.554	688.304	-1.04155	0.000611677	male-biased gene
EPS8L2	female	male	202.619	284.401	237.668	-0.489054	0.0382533	926.804	1343.4	1105.34	-0.535422	0.0240458	male-biased gene
SMG7	female	male	1455.09	1772.34	1591.05	-0.284538	0.0279047	204.254	536.162	346.5	-1.39189	0.00108647	male-biased gene
SLC41A1	female	male	2606.62	3562.29	3016.19	-0.450629	2.81573e-06	305.954	729.351	487.41	-1.25318	0.000306262	male-biased gene
TGFBR2	female	male	228.213	311.703	263.994	-0.449875	0.016738	255.453	475.788	349.882	-0.898634	0.0191921	male-biased gene
LOX	female	male	226.199	415.172	307.187	-0.876286	0.0030226	154.248	790.921	427.108	-2.35961	0.00102212	male-biased gene
CLEC16A	female	male	1349.7	2050	1649.83	-0.603004	3.97011e-10	277.969	454.23	353.509	-0.708629	0.0148436	male-biased gene
ATP6V0A1	female	male	9430.06	12092.4	10571.1	-0.358762	5.25036e-05	505.067	794.277	629.014	-0.653977	0.0334024	male-biased gene
MTSS1	female	male	675.19	1288.05	937.844	-0.931835	2.33648e-05	635.5	2265.32	1333.99	-1.83379	0.00181511	male-biased gene
CDKN1A	female	male	88.8424	150.426	115.235	-0.75998	0.0392509	156.343	401.098	261.238	-1.35816	0.0166671	male-biased gene
PPFIA1	female	male	1197.99	1481.57	1319.52	-0.306525	0.0147708	433.707	650.356	526.556	-0.584321	0.0242527	male-biased gene
TAR1	female	male	25.1666	367.614	171.93	-3.86846	6.53136e-43	49.9726	418.47	207.9	-3.06447	7.92777e-18	male-biased gene
BRPF3	female	male	975.515	1428.45	1169.63	-0.550216	1.34802e-07	788.57	1898.33	1264.18	-1.26741	0.000548609	male-biased gene
NEDD9	female	male	201.392	388.434	281.553	-0.947725	3.79489e-05	167.928	470.642	297.662	-1.48585	0.0226056	male-biased gene
JAK1	female	male	3356.59	4200.59	3718.31	-0.323613	0.000441299	1692.28	2859.52	2192.52	-0.756791	0.00192296	male-biased gene
ZFR	female	male	2392.17	3013.23	2658.34	-0.332992	0.0056002	426.65	755.343	567.518	-0.823817	0.0433302	male-biased gene
NCOA2	female	male	1814.91	2594.38	2148.97	-0.515475	0.000307745	812.01	1804.42	1237.33	-1.15184	0.000171372	male-biased gene
HIPK2	female	male	3191.6	4848.02	3901.5	-0.603113	6.74318e-05	1247.86	2925.6	1966.89	-1.22939	8.45964e-09	male-biased gene
ZMIZ1	female	male	3364.79	5245.59	4170.85	-0.640589	4.0435e-07	396.262	657.534	508.236	-0.731707	0.0268427	male-biased gene
CHERP	female	male	934.721	1380.85	1125.92	-0.56294	3.33343e-05	188.292	344.416	255.202	-0.870974	0.0121554	male-biased gene
PLD3	female	male	13727.6	20932.2	16815.3	-0.608645	3.13926e-15	1757.49	2880.96	2238.97	-0.71307	0.00905187	male-biased gene
PABPC1	female	male	2003.73	3062.54	2457.5	-0.612084	1.68207e-06	3329.63	6061.63	4500.49	-0.864278	0.00717013	male-biased gene
USP22	female	male	6357.92	8440.61	7250.5	-0.408788	0.000118031	629.683	1019.42	796.713	-0.695317	0.0178652	male-biased gene
UNC93B1	female	male	87.5291	142.201	110.96	-0.700481	0.0126846	263.608	416.032	328.933	-0.658671	0.0402188	male-biased gene
ZFHX3	female	male	466.16	697.417	565.27	-0.581157	0.00660129	105.698	326.39	200.28	-1.62748	2.82701e-05	male-biased gene
PER1	female	male	11902.5	14683.5	13094.3	-0.302936	1.2833e-05	1164.93	1919.19	1488.19	-0.720451	0.0386809	male-biased gene
STX1B	female	male	2571.48	4219.44	3277.75	-0.71446	3.17058e-16	15.7457	51.5398	31.086	-1.72195	0.0441592	male-biased gene
SIK3	female	male	2166.92	3136.9	2582.62	-0.533684	2.59932e-10	328.482	719.262	495.959	-1.13137	0.000263941	male-biased gene
SLC5A2	female	male	304.82	425.948	356.732	-0.482591	0.00688549	84.9048	137.811	107.579	-0.697439	0.0495151	male-biased gene
ARHGAP35	female	male	4050.64	4899.77	4414.55	-0.274563	0.0320482	1170.53	2546.2	1760.1	-1.12109	0.00182258	male-biased gene
PLEKHG1	female	male	299.156	435.649	357.653	-0.542372	0.0273293	69.8016	160.614	108.721	-1.2072	0.0332447	male-biased gene
PREX1	female	male	2152.84	2710.02	2391.63	-0.332063	0.00432931	109.299	224.785	158.793	-1.03828	0.0192505	male-biased gene
CTSA	female	male	1864.94	2326.34	2062.69	-0.318909	0.0115797	2512.1	3998.73	3149.23	-0.670661	0.0054176	male-biased gene
POM121C	female	male	835.236	1270.65	1021.84	-0.605314	1.15323e-05	122.769	383.464	234.495	-1.64334	1.71461e-05	male-biased gene
ZNF689	female	male	447.073	690.287	551.308	-0.626621	4.14251e-05	116.372	223.622	162.336	-0.941288	0.00433254	male-biased gene
NUMA1	female	male	3105.68	4061.43	3515.29	-0.387072	0.0031925	823.34	1189.19	980.131	-0.530514	0.0416979	male-biased gene
ELL2	female	male	614.244	884.45	730.046	-0.525908	0.000725234	1465.06	2830.57	2050.28	-0.950156	0.000834065	male-biased gene
NFKBIA	female	male	726.266	1432.26	1028.83	-0.97973	0.000164333	857.29	1809.79	1265.5	-1.07817	0.0107441	male-biased gene
ZNF592	female	male	805.418	998.67	888.24	-0.310262	0.0361299	478.035	964.731	686.619	-1.01315	0.00201372	male-biased gene
PLEKHM2	female	male	2236.82	3163.44	2633.94	-0.500069	5.45189e-07	695.958	1670.41	1113.58	-1.26302	1.53617e-05	male-biased gene
EPAS1	female	male	2178.23	3009.88	2534.65	-0.466549	0.0264301	3856.04	8801.14	5975.37	-1.19053	0.00202076	male-biased gene
AMPD2	female	male	1488.93	1885.13	1658.73	-0.340433	0.00141243	218.521	465.665	324.44	-1.09133	0.00409292	male-biased gene
R3HDM1	female	male	1829.01	2369.21	2060.52	-0.373335	0.00784881	317.837	579.72	430.073	-0.867208	0.00843924	male-biased gene
ZNFX1	female	male	2084.54	2521.51	2271.81	-0.274566	0.0314786	452.451	799.752	601.294	-0.822009	0.00425563	male-biased gene
ERRFI1	female	male	734.409	1022.78	857.996	-0.477795	9.27084e-05	3161.76	6476.13	4582.2	-1.03448	0.00144989	male-biased gene
HMGXB3	female	male	842.043	1056.3	933.866	-0.327089	0.0127328	149.843	288.986	209.476	-0.94801	0.0140999	male-biased gene
ZXDB	female	male	535.762	801.739	649.752	-0.581531	2.45706e-05	126.284	212.09	163.058	-0.748206	0.0444488	male-biased gene
WNK1	female	male	3369.3	5084.41	4104.35	-0.593647	3.2808e-07	581.721	1293.26	886.667	-1.1528	0.00779418	male-biased gene
MED22	female	male	89.8459	188.744	132.231	-1.07108	8.39744e-07	21.7277	63.0202	39.4245	-1.53014	0.00717013	male-biased gene
HMGA1	female	male	752.024	1243.41	962.617	-0.725491	1.53355e-12	138.274	269.393	194.468	-0.960013	0.000927389	male-biased gene
CSF1R	female	male	847.487	1151.59	977.816	-0.44239	0.00158213	701.921	1483.06	1036.69	-1.07902	5.77705e-05	male-biased gene
TBC1D9	female	male	3528.83	4176.21	3806.28	-0.243021	0.0419354	87.4037	156.549	117.038	-0.837238	0.0463047	male-biased gene
ACTG1	female	male	10385.1	15136.6	12421.5	-0.543526	5.08449e-12	912.651	2609.82	1640.01	-1.51582	0.00214793	male-biased gene
POMGNT2	female	male	607.44	953.966	755.951	-0.651141	3.32702e-09	96.2911	188.585	135.846	-0.968129	0.0292256	male-biased gene
SAMD4B	female	male	783.691	978.685	867.26	-0.320619	0.0224667	183.762	455.022	300.016	-1.30808	0.000585895	male-biased gene
NUP62	female	male	940.837	1399.79	1137.53	-0.573221	2.16466e-07	306.207	525.597	400.231	-0.778823	0.0290787	male-biased gene
ITPRIP	female	male	85.6054	154.429	115.101	-0.851306	0.00119491	99.9205	181.675	134.958	-0.865812	0.0490563	male-biased gene
SCAF4	female	male	451.643	650.146	536.716	-0.525666	0.00311452	164.689	344.401	241.709	-1.06362	0.00345516	male-biased gene
CHPF	female	male	1040.77	1787.96	1361	-0.780652	2.14416e-12	443.529	759.962	579.143	-0.776751	0.0283539	male-biased gene
SMAP2	female	male	1988.01	2884.38	2372.17	-0.536963	5.50554e-07	746.947	1423.36	1036.84	-0.930264	6.40381e-05	male-biased gene
TADA2B	female	male	139.462	212.363	170.705	-0.606907	0.00716074	86.1045	186.483	129.124	-1.11376	0.00767008	male-biased gene
SMG9	female	male	428.952	544.482	478.465	-0.344082	0.0154296	231.623	346.029	280.655	-0.58002	0.0444179	male-biased gene
WAC	female	male	4648.07	6255.29	5336.88	-0.428441	1.8379e-05	1364.5	2421.5	1817.5	-0.827602	0.004216	male-biased gene
CDH5	female	male	270.156	552.969	391.362	-1.03343	0.000507994	464.321	817.17	615.542	-0.815459	0.0287466	male-biased gene
UBR4	female	male	3829.41	4841.6	4263.2	-0.338367	0.00477771	1740.94	3243.77	2385.01	-0.897961	0.00843924	male-biased gene
MROH1	female	male	1173.09	1745.69	1418.49	-0.57352	3.07168e-06	374.283	589.063	466.332	-0.654612	0.0195359	male-biased gene
SLC16A1	female	male	700.663	852.313	765.656	-0.282677	0.0476889	1635.95	3843.75	2582.15	-1.23228	0.00104143	male-biased gene
SRF	female	male	413.241	534.641	465.27	-0.371559	0.0190942	83.887	183.881	126.741	-1.12965	0.00581741	male-biased gene
HIPK1	female	male	4630.42	6626.4	5485.84	-0.517073	7.13782e-05	987.792	2114.59	1470.71	-1.09796	0.000518146	male-biased gene
ARID1A	female	male	2322.95	3179.81	2690.18	-0.452986	9.94087e-06	715.7	1191.31	919.534	-0.735185	0.0294724	male-biased gene
RNF44	female	male	857.296	1209.44	1008.22	-0.496489	0.00108816	133.621	278.934	195.898	-1.06084	0.0350058	male-biased gene
EMSY	female	male	820.591	1160.52	966.277	-0.499995	0.000764029	105.695	197.822	145.178	-0.905724	0.00332432	male-biased gene
ERC1	female	male	1071.02	1498.16	1254.08	-0.484204	0.00380656	403.277	728.259	542.555	-0.853212	0.0105087	male-biased gene
TOB1	female	male	576.581	998.349	757.339	-0.791968	3.84184e-06	255.953	634.514	418.193	-1.31026	1.35109e-05	male-biased gene
ZNF358	female	male	1168.06	2070.73	1554.92	-0.826059	2.57677e-19	458.125	764.812	589.562	-0.739472	0.0198706	male-biased gene
PNPLA2	female	male	672.403	944.078	788.835	-0.489647	0.000382886	2930.89	5052.01	3839.94	-0.785502	0.0495103	male-biased gene
PATL1	female	male	536.684	675.054	595.986	-0.330879	0.0183445	313.784	496.696	392.175	-0.663635	0.0424176	male-biased gene
PUM1	female	male	2250.87	3068.78	2601.4	-0.447174	3.33061e-05	677.217	1254.85	924.773	-0.889911	0.00323452	male-biased gene
RAB7A	female	male	3036.49	4443.38	3639.44	-0.549255	4.85471e-14	1713.95	2689.06	2131.86	-0.649615	0.0064895	male-biased gene
DUSP8	female	male	1728.4	2610.83	2106.58	-0.595051	8.00176e-06	280.285	651.093	439.203	-1.21555	0.00181108	male-biased gene
TFR2	female	male	911.642	570.43	765.408	0.676357	1.79144e-05	1800.22	3027.32	2326.12	-0.750024	0.0130266
ATP2B2	female	male	9840.26	12252.5	10874.1	-0.31631	0.0109323	234.065	125.678	187.613	0.897413	0.00977639
IGFBP2	female	male	377.077	526.531	441.129	-0.481663	0.0112812	2691.75	743.651	1856.85	1.85567	0.000507307
WSB1	female	male	1832.61	1163.65	1545.91	0.655282	2.0627e-06	1141.46	3190.37	2019.57	-1.48312	0.00201372
NGEF	female	male	2284.51	2981	2583.01	-0.383904	0.00248791	371.391	186.125	291.991	0.996805	0.0275064
AMIGO2	female	male	343.829	227.682	294.052	0.594743	0.000559901	13.7713	76.5844	40.6912	-2.4782	0.0252245
SLC39A14	female	male	760.433	622.887	701.485	0.287888	0.0416212	5725.83	17552.9	10794.6	-1.61615	0.0185425
LEPR	female	male	122.882	73.8421	101.865	0.734835	0.026497	3778.7	10291.9	6570.06	-1.44557	0.00960235
ZNF259	female	male	531.191	385.494	468.75	0.462541	0.00451841	10231.1	18221.7	13655.7	-0.832728	0.0471484
ERG28	female	male	134.869	203.393	164.236	-0.592806	0.0182333	134.886	48.4974	97.8625	1.4748	0.0138975
AGBL3	female	male	123.484	65.2688	98.5346	0.919813	0.000497511	133.811	578.6	324.435	-2.11271	0.000919793
FBXW5	female	male	1058.99	1642.15	1308.91	-0.632894	1.62193e-10	5946.17	3567.19	4926.61	0.737223	0.0196723
