# Supplementary material for: Sex differences in gene expression and alternative splicing in the Chinese horseshoe bat
Source: PeerJ. 2023 Apr 24;11:e15231. doi: 10.7717/peerj.15231 (PMC10135408; doi:10.7717/peerj.15231)
Supplement: Table S3 — Significant terms and pathways with the q-value of 0.05 were shown in bold. Highlighted terms are those representatives after removing the redundancy. Log (q-value) of −1.3 is equal to q-value of 0.05. Terms and pathways with uncorrected p < 0.01 were also shown. Log (p-value) of −2.2 is equal to p-value of 0.01 [file peerj-11-15231-s003.xlsx]

## Sheet: brain-male-specific-gene-133
Category	GO	Description	LogP	Hits	Log(q-value)
GO Biological Processes	GO:0007586	digestion	-6.5	FABP1|FABP2|SI|SLC5A1|TFF2|TFF3|NPC1L1|MUC13	-2.5
GO Biological Processes	GO:0022600	digestive system process	-6.2	FABP1|FABP2|SLC5A1|TFF2|TFF3|NPC1L1|MUC13	-2.5
GO Biological Processes	GO:0015908	fatty acid transport	-6.1	BDKRB2|FABP1|FABP2|FABP6|RBP2|SLC27A2|OC90	-2.5
GO Biological Processes	GO:0015849	organic acid transport	-6.1	AQP9|BDKRB2|ABCC2|FABP1|FABP2|FABP6|FOLR1|RBP2|ABCC3|SLC27A2|SLC5A12|OC90	-2.5
GO Biological Processes	GO:0019557	histidine catabolic process to glutamate and formate	-5.5	HAL|UROC1|AMDHD1	-2.1
GO Biological Processes	GO:0043606	formamide metabolic process	-5.5	HAL|UROC1|AMDHD1	-2.1
GO Biological Processes	GO:0019556	histidine catabolic process to glutamate and formamide	-5.5	HAL|UROC1|AMDHD1	-2.1
GO Biological Processes	GO:0006869	lipid transport	-5.3	AQP9|BDKRB2|ABCC2|FABP1|FABP2|FABP6|RBP2|ABCC3|SLC27A2|NPC1L1|CIDEC|OC90	-2
GO Biological Processes	GO:0009913	epidermal cell differentiation	-5.1	EPHA2|EREG|KRT8|OVOL1|TGM1|SLC44A4|ACER1|STRC	-1.8
GO Biological Processes	GO:0015942	formate metabolic process	-4.8	HAL|UROC1|AMDHD1	-1.6
GO Biological Processes	GO:0010876	lipid localization	-4.8	AQP9|BDKRB2|ABCC2|FABP1|FABP2|FABP6|RBP2|ABCC3|SLC27A2|NPC1L1|CIDEC|OC90	-1.6
GO Biological Processes	GO:0070098	chemokine-mediated signaling pathway	-4.6	CCR10|MPL|CCL25|TFF2|CCR9	-1.5
GO Biological Processes	GO:0006548	histidine catabolic process	-4.3	HAL|UROC1|AMDHD1	-1.3
GO Biological Processes	GO:0015909	long-chain fatty acid transport	-4.3	BDKRB2|FABP1|FABP2|SLC27A2|OC90	-1.3
GO Biological Processes	GO:0015718	monocarboxylic acid transport	-4.3	AQP9|BDKRB2|ABCC2|ABCC3|SLC5A12|OC90	-1.3
GO Biological Processes	GO:0019221	cytokine-mediated signaling pathway	-4.2	FAS|EREG|CCR10|IL2RG|KRT18|MPL|CCL25|TFF2|CCR9|IL21R	-1.2
GO Biological Processes	GO:1990868	response to chemokine	-4.2	CCR10|MPL|CCL25|TFF2|CCR9	-1.2
GO Biological Processes	GO:1990869	cellular response to chemokine	-4.2	CCR10|MPL|CCL25|TFF2|CCR9	-1.2
GO Biological Processes	GO:0071715	icosanoid transport	-4.1	BDKRB2|ABCC2|ABCC3|OC90	-1.2
GO Biological Processes	GO:0050892	intestinal absorption	-4.1	FABP1|FABP2|SLC5A1|NPC1L1	-1.2
GO Biological Processes	GO:0008544	epidermis development	-4.1	EPHA2|EREG|KRT8|OVOL1|RBP2|TGM1|SLC44A4|ACER1|STRC	-1.2
GO Biological Processes	GO:0006547	histidine metabolic process	-4	HAL|UROC1|AMDHD1	-1.1
GO Biological Processes	GO:0030277	maintenance of gastrointestinal epithelium	-3.6	TFF2|TFF3|MUC13	-0.84
GO Biological Processes	GO:0035672	oligopeptide transmembrane transport	-3.6	CDH17|SLC15A1|SLC15A3	-0.84
GO Biological Processes	GO:0030216	keratinocyte differentiation	-3.5	EPHA2|EREG|KRT8|TGM1|ACER1	-0.71
GO Biological Processes	GO:0006857	oligopeptide transport	-3.4	CDH17|SLC15A1|SLC15A3	-0.69
GO Biological Processes	GO:0042886	amide transport	-3.4	AQP9|CDH17|FOLR1|IL1RN|SLC15A1|SLC15A3	-0.68
GO Biological Processes	GO:0006820	anion transport	-3.2	AQP9|BDKRB2|ABCC2|FOLR1|ABCC3|NMUR1|CLCA4|SLC44A4|SLC5A12|SLC9C1|OC90	-0.55
GO Biological Processes	GO:0098657	import into cell	-3	FOLR1|SLC5A1|SLC15A1|SLC27A2|SLC15A3|STEAP4|SLC9C1	-0.35
GO Biological Processes	GO:0032787	monocarboxylic acid metabolic process	-3	CYP1A1|CYP1A2|FABP2|HAL|PGAM2|VNN1|PTGES|SLC27A2|LPIN3|UROC1|AMDHD1	-0.31
GO Biological Processes	GO:0010669	epithelial structure maintenance	-2.9	TFF2|TFF3|MUC13	-0.28
GO Biological Processes	GO:0009593	detection of chemical stimulus	-2.9	AZGP1|PIGR|OR5K1|DRGX	-0.27
GO Biological Processes	GO:0002526	acute inflammatory response	-2.9	FCGR3A|SAA1|VNN1|C2CD4A	-0.26
GO Biological Processes	GO:0015850	organic hydroxy compound transport	-2.9	AQP9|ABCC2|SLC5A1|ABCC3|NPC1L1|SLC5A12	-0.26
GO Biological Processes	GO:0015721	bile acid and bile salt transport	-2.9	AQP9|ABCC2|ABCC3	-0.26
GO Biological Processes	GO:0007204	positive regulation of cytosolic calcium ion concentration	-2.9	BDKRB2|CCR10|P2RX3|SAA1|CCR9|JPH2	-0.25
GO Biological Processes	GO:0050907	detection of chemical stimulus involved in sensory perception	-2.8	AZGP1|PIGR|OR5K1	-0.18
GO Biological Processes	GO:0042445	hormone metabolic process	-2.7	CYP1A1|CYP1A2|DPP4|ENPEP|FOXA1|MEP1A	-0.15
GO Biological Processes	GO:0060326	cell chemotaxis	-2.7	EPHA2|CCR10|HOXB9|SAA1|CCL25|CCR9	-0.14
GO Biological Processes	GO:0046942	carboxylic acid transport	-2.7	AQP9|BDKRB2|ABCC2|FOLR1|ABCC3|SLC5A12|OC90	-0.12
GO Biological Processes	GO:0030855	epithelial cell differentiation	-2.7	CYP1A1|EPHA2|EREG|FOXA1|KRT8|OVOL1|TGM1|KRT20|SLC44A4|ACER1|STRC	-0.11
GO Biological Processes	GO:0006536	glutamate metabolic process	-2.6	HAL|UROC1|AMDHD1	-0.085
GO Biological Processes	GO:0015711	organic anion transport	-2.6	AQP9|BDKRB2|ABCC2|FOLR1|ABCC3|SLC44A4|SLC5A12|OC90	-0.08
GO Biological Processes	GO:0006936	muscle contraction	-2.6	BDKRB2|CHRNE|P2RX3|PGAM2|TNNI2|TNNT3|NMUR1	-0.08
GO Biological Processes	GO:0016486	peptide hormone processing	-2.6	DPP4|ENPEP|MEP1A	-0.06
GO Biological Processes	GO:0007606	sensory perception of chemical stimulus	-2.6	AZGP1|P2RX3|PIGR|OR5K1	-0.046
GO Biological Processes	GO:0019748	secondary metabolic process	-2.5	CYP1A1|CYP1A2|PMEL	-0.043
GO Biological Processes	GO:0050909	sensory perception of taste	-2.5	AZGP1|P2RX3|PIGR	-0.043
GO Biological Processes	GO:0140448	signaling receptor ligand precursor processing	-2.5	DPP4|ENPEP|MEP1A	-0.043
GO Biological Processes	GO:0071345	cellular response to cytokine stimulus	-2.5	FAS|EREG|GBP1|CCR10|IL2RG|KRT18|MPL|CCL25|TFF2|CCR9|IL21R|GBP7	-0.0012
GO Biological Processes	GO:0015833	peptide transport	-2.4	CDH17|IL1RN|SLC15A1|SLC15A3	0
GO Biological Processes	GO:0050906	detection of stimulus involved in sensory perception	-2.3	AZGP1|PIGR|OR5K1|STRC	0
GO Biological Processes	GO:0043588	skin development	-2.3	EPHA2|EREG|KRT8|OVOL1|TGM1|ACER1	0
GO Biological Processes	GO:0006954	inflammatory response	-2.2	BDKRB2|EPHA2|FCGR3A|IL1RN|MEP1B|SAA1|CCL25|VNN1|C2CD4A	0
GO Biological Processes	GO:0006766	vitamin metabolic process	-2.2	CYP1A1|FOLR1|RBP2|VNN1	0
GO Biological Processes	GO:0006778	porphyrin-containing compound metabolic process	-2.2	ABCC2|CYP1A1|CYP1A2	0
GO Biological Processes	GO:0003012	muscle system process	-2.2	BDKRB2|CHRNE|P2RX3|PGAM2|TNNI2|TNNT3|NMUR1	0
GO Biological Processes	GO:0050819	negative regulation of coagulation	-2.1	PROC|TSPAN8|PROCR	0
GO Biological Processes	GO:0043648	dicarboxylic acid metabolic process	-2.1	FOLR1|HAL|UROC1|AMDHD1	0
GO Biological Processes	GO:0098739	import across plasma membrane	-2.1	FOLR1|SLC5A1|SLC15A1|SLC15A3|SLC9C1	0
GO Biological Processes	GO:0045104	intermediate filament cytoskeleton organization	-2.1	KRT8|KRT18|KRT20	0
GO Biological Processes	GO:0050878	regulation of body fluid levels	-2.1	F13B|MPL|PROC|SAA1|TSPAN8|PROCR|BPIFA1|ACER1	0
GO Biological Processes	GO:0045103	intermediate filament-based process	-2	KRT8|KRT18|KRT20	0
GO Biological Processes	GO:0070988	demethylation	-2	CYP1A1|CYP1A2|KDM5D	0
GO Biological Processes	GO:0009611	response to wounding	-2	CYP1A1|EREG|F13B|FOLR1|MPL|MSX2|PROC|SAA1|PROCR	0
GO Biological Processes	GO:0042742	defense response to bacterium	-2	EPHA2|TRDC|BPIFA1|GBP7|ZG16	0
GO Cellular Components	GO:0045177	apical part of cell	-6.6	ABCC2|DPP4|ENPEP|FABP1|FABP2|FOLR1|MYO1A|SI|SLC5A1|SLC15A1|CLCA4|NPC1L1|MUC13|SLC44A4|MUC17|SLC5A12	-2.5
GO Cellular Components	GO:0009897	external side of plasma membrane	-6.1	FAS|AZGP1|ENPEP|FCGR3A|FOLR1|CCR10|IL2RG|MPL|CCR9|TRDC|IL21R|MUC17|FCRL6	-2.5
GO Cellular Components	GO:0016324	apical plasma membrane	-6	ABCC2|DPP4|ENPEP|FOLR1|MYO1A|SI|SLC5A1|SLC15A1|CLCA4|NPC1L1|MUC13|SLC44A4|MUC17|SLC5A12	-2.5
GO Cellular Components	GO:0005903	brush border	-4.6	ENPEP|FOLR1|MYO1A|TMPRSS15|SI|SLC5A1|SLC15A1	-1.5
GO Cellular Components	GO:0098862	cluster of actin-based cell projections	-4.3	ENPEP|FOLR1|MYO1A|TMPRSS15|SI|SLC5A1|SLC15A1|STRC	-1.3
GO Cellular Components	GO:0098552	side of membrane	-3.6	FAS|AZGP1|ENPEP|FCGR3A|FOLR1|CCR10|IL2RG|MPL|CCR9|TRDC|IL21R|MUC17|FCRL6	-0.81
GO Cellular Components	GO:0005796	Golgi lumen	-2.2	PROC|MUC13|MUC17|ZG16	0
GO Cellular Components	GO:0016323	basolateral plasma membrane	-2	AQP9|CDH17|CLDN7|FOLR1|MYO1A|ABCC3	0
GO Molecular Functions	GO:0140375	immune receptor activity	-4.9	FCGR3A|CCR10|IL2RG|MPL|PIGR|CCR9|IL21R	-1.7
GO Molecular Functions	GO:0035673	oligopeptide transmembrane transporter activity	-3.9	CDH17|SLC15A1|SLC15A3	-1
GO Molecular Functions	GO:0042887	amide transmembrane transporter activity	-3.7	AQP9|CDH17|SLC15A1|SLC15A3	-0.91
GO Molecular Functions	GO:1904680	peptide transmembrane transporter activity	-3.5	CDH17|SLC15A1|SLC15A3	-0.76
GO Molecular Functions	GO:0005504	fatty acid binding	-3.4	FABP1|FABP2|FABP6|RBP2	-0.68
GO Molecular Functions	GO:0004896	cytokine receptor activity	-3.4	CCR10|IL2RG|MPL|CCR9|IL21R	-0.68
GO Molecular Functions	GO:0005324	long-chain fatty acid transporter activity	-3.4	FABP1|FABP2|SLC27A2	-0.64
GO Molecular Functions	GO:1901618	organic hydroxy compound transmembrane transporter activity	-3.3	AQP9|SLC5A1|ABCC3|SLC5A12	-0.59
GO Molecular Functions	GO:0022853	active ion transmembrane transporter activity	-2.8	ABCC2|COX6A2|SLC5A1|SLC15A1|ABCC3|SLC15A3|SLC5A12|SLC9C1	-0.21
GO Molecular Functions	GO:0033293	monocarboxylic acid binding	-2.8	FABP1|FABP2|FABP6|RBP2	-0.17
GO Molecular Functions	GO:0019955	cytokine binding	-2.5	GBP1|CCR10|IL1RN|IL2RG|CCR9	0
GO Molecular Functions	GO:0038024	cargo receptor activity	-2.4	FOLR1|TMPRSS15|MARCO|PRG4	0
GO Molecular Functions	GO:0032451	demethylase activity	-2.4	CYP1A1|CYP1A2|KDM5D	0
GO Molecular Functions	GO:0005044	scavenger receptor activity	-2.3	TMPRSS15|MARCO|PRG4	0
GO Molecular Functions	GO:0022804	active transmembrane transporter activity	-2.2	CDH17|ABCC2|COX6A2|SLC5A1|SLC15A1|ABCC3|SLC15A3|SLC5A12|SLC9C1	0
GO Molecular Functions	GO:0031406	carboxylic acid binding	-2.1	FABP1|FABP2|FABP6|FOLR1|RBP2	0
GO Molecular Functions	GO:1901682	sulfur compound transmembrane transporter activity	-2	ABCC2|ABCC3|SLC44A4	0
GO Molecular Functions	GO:0008028	monocarboxylic acid transmembrane transporter activity	-2	ABCC3|SLC27A2|SLC5A12	0
GO Molecular Functions	GO:1901505	carbohydrate derivative transmembrane transporter activity	-2	SLC5A1|ABCC3|SLC15A3	0
KEGG Pathway	hsa00340	Histidine metabolism	-4.3	AOC1|HAL|UROC1|AMDHD1	-1.9
KEGG Pathway	hsa04060	Cytokine-cytokine receptor interaction	-4.2	FAS|CCR10|IL1RN|IL2RG|MPL|CCL25|CCR9|IL21R	-1.9
KEGG Pathway	hsa04672	Intestinal immune network for IgA production	-4	CCR10|PIGR|CCL25|CCR9	-1.9
KEGG Pathway	hsa04061	Viral protein interaction with cytokine and cytokine receptor	-3	CCR10|IL2RG|CCL25|CCR9	-1.1
KEGG Pathway	hsa01523	Antifolate resistance	-2.8	ABCC2|FOLR1|ABCC3	-0.93
KEGG Pathway	hsa04975	Fat digestion and absorption	-2.6	FABP1|FABP2|NPC1L1	-0.86
KEGG Pathway	hsa04976	Bile secretion	-2.5	AQP9|ABCC2|SLC5A1|ABCC3	-0.81
KEGG Pathway	hsa03320	PPAR signaling pathway	-2.4	FABP1|FABP2|FABP6|SLC27A2	-0.8
KEGG Pathway	hsa04610	Complement and coagulation cascades	-2.3	BDKRB2|F13B|PROC|PROCR	-0.71
KEGG Pathway	hsa00380	Tryptophan metabolism	-2.2	AOC1|CYP1A1|CYP1A2	-0.7
KEGG Pathway	hsa05150	Staphylococcus aureus infection	-2.1	FCGR3A|KRT18|KRT20	-0.62
KEGG Pathway	hsa04974	Protein digestion and absorption	-2.1	DPP4|MEP1A|MEP1B|SLC15A1	-0.6

## Sheet: brain-female-specific-gene-232
Category	GO	Description	LogP	Hits	Log(q-value)
GO Biological Processes	GO:0048285	organelle fission	-3.9	BIRC5|BUB1B|CDC20|KIF23|ESPL1|KIF14|STAG3|FBXO5|SEC16B|PEX11G|MTFR2|TDRD9|KIF18B|MEI4	0
GO Biological Processes	GO:0051783	regulation of nuclear division	-3.9	BIRC5|BUB1B|CDC20|CDC25C|EGF|ESPL1|FBXO5|CDCA2|STRA8	0
GO Biological Processes	GO:0007088	regulation of mitotic nuclear division	-3.6	BIRC5|BUB1B|CDC20|CDC25C|EGF|ESPL1|FBXO5|CDCA2	0
GO Biological Processes	GO:0009584	detection of visible light	-3.5	CACNA1F|PDE6C|SAG|CACNA2D4	0
GO Biological Processes	GO:0007059	chromosome segregation	-3.4	BIRC5|BUB1B|CDC20|KIF23|ESPL1|KIF14|STAG3|OIP5|KNL1|KIF18B|CDCA2|MEI4	0
GO Biological Processes	GO:0002825	regulation of T-helper 1 type immune response	-3.4	IL18|CCL19|TBX21|NLRP10	0
GO Biological Processes	GO:0051321	meiotic cell cycle	-3.3	BUB1B|OSGIN2|EXO1|ESPL1|STAG3|FBXO5|TDRD9|EXD1|STRA8|MEI4	0
GO Biological Processes	GO:0019730	antimicrobial humoral response	-3.3	ELANE|HMGN2|CXCL10|PF4|PRTN3	0
GO Biological Processes	GO:0098813	nuclear chromosome segregation	-3.2	BIRC5|BUB1B|CDC20|KIF23|ESPL1|KIF14|STAG3|KNL1|KIF18B|MEI4	0
GO Biological Processes	GO:0000819	sister chromatid segregation	-3.2	BIRC5|BUB1B|CDC20|KIF23|ESPL1|KIF14|STAG3|KIF18B	0
GO Biological Processes	GO:0061844	antimicrobial humoral immune response mediated by antimicrobial peptide	-3.2	ELANE|HMGN2|CXCL10|PF4	0
GO Biological Processes	GO:0019370	leukotriene biosynthetic process	-3	MGST2|PLA2G5|PRG3	0
GO Biological Processes	GO:0009583	detection of light stimulus	-2.9	CACNA1F|PDE6C|SAG|CACNA2D4	0
GO Biological Processes	GO:0032757	positive regulation of interleukin-8 production	-2.9	APOA2|ELANE|PRG3|CD244|NLRP10	0
GO Biological Processes	GO:0010744	positive regulation of macrophage derived foam cell differentiation	-2.9	IL18|PF4|PLA2G5	0
GO Biological Processes	GO:0002827	positive regulation of T-helper 1 type immune response	-2.8	IL18|TBX21|NLRP10	0
GO Biological Processes	GO:0000280	nuclear division	-2.7	BIRC5|BUB1B|CDC20|KIF23|ESPL1|KIF14|STAG3|FBXO5|TDRD9|KIF18B|MEI4	0
GO Biological Processes	GO:1990266	neutrophil migration	-2.7	CXCL10|PF4|PRTN3|CCL19|CD177	0
GO Biological Processes	GO:0048232	male gamete generation	-2.5	CDC25C|GHSR|FOXA3|DHH|YBX2|TAF7L|ADCY10|KNL1|GTSF1|TDRD9|CCDC42|ADAMTS16|STRA8|MEI4	0
GO Biological Processes	GO:0097530	granulocyte migration	-2.5	CXCL10|PF4|PRTN3|CCL19|CD177	0
GO Biological Processes	GO:0002697	regulation of immune effector process	-2.5	APOA2|IL7R|IL18|PLA2G5|CCL19|SPINK5|TBX21|CD244|DDX60|CD177|PIK3R6	0
GO Biological Processes	GO:0031424	keratinization	-2.5	ABCA12|KRT80|LIPM	0
GO Biological Processes	GO:0006691	leukotriene metabolic process	-2.4	MGST2|PLA2G5|PRG3	0
GO Biological Processes	GO:0032677	regulation of interleukin-8 production	-2.4	APOA2|ELANE|PRG3|CD244|NLRP10	0
GO Biological Processes	GO:0040020	regulation of meiotic nuclear division	-2.3	CDC20|FBXO5|STRA8	0
GO Biological Processes	GO:0051444	negative regulation of ubiquitin-protein transferase activity	-2.3	BUB1B|CDC20|FBXO5	0
GO Biological Processes	GO:0050900	leukocyte migration	-2.3	ELANE|CXCL10|PF4|PRTN3|CCL19|SELL|TBX21|CD177	0
GO Biological Processes	GO:0009617	response to bacterium	-2.3	CHIT1|ELANE|GHSR|IL7R|IL18|CXCL10|PF4|RAB7A|KMO|TRDN|IKZF3|KLHL6|GSDMA|NLRP10	0
GO Biological Processes	GO:0000070	mitotic sister chromatid segregation	-2.3	BIRC5|CDC20|KIF23|ESPL1|KIF14|KIF18B	0
GO Biological Processes	GO:0007276	gamete generation	-2.2	CDC25C|GHSR|FOXA3|FBXO5|DHH|YBX2|TAF7L|ADCY10|KNL1|GTSF1|TDRD9|CCDC42|ADAMTS16|STRA8|SPIN2B|MEI4	0
GO Biological Processes	GO:0007283	spermatogenesis	-2.2	CDC25C|GHSR|FOXA3|DHH|YBX2|TAF7L|ADCY10|KNL1|GTSF1|TDRD9|CCDC42|STRA8|MEI4	0
GO Biological Processes	GO:0010743	regulation of macrophage derived foam cell differentiation	-2.2	IL18|PF4|PLA2G5	0
GO Biological Processes	GO:0033047	regulation of mitotic sister chromatid segregation	-2.1	BIRC5|BUB1B|CDC20|FBXO5	0
GO Biological Processes	GO:0097529	myeloid leukocyte migration	-2.1	CXCL10|PF4|PRTN3|CCL19|CD177	0
GO Biological Processes	GO:0006959	humoral immune response	-2	ELANE|HMGN2|CXCL10|PF4|PRTN3|EXO1	0
GO Biological Processes	GO:0046596	regulation of viral entry into host cell	-2	TRIM14|TRIM10|TRIM38	0
GO Biological Processes	GO:0051445	regulation of meiotic cell cycle	-2	CDC20|CDC25C|FBXO5|STRA8	0
GO Biological Processes	GO:0051983	regulation of chromosome segregation	-2	BIRC5|BUB1B|CDC20|ESPL1|FBXO5|CDCA2	0
GO Cellular Components	GO:0042599	lamellar body	-3.5	RAB7A|SPINK5|ABCA12	0
GO Cellular Components	GO:0005871	kinesin complex	-2.2	KIF23|KIF14|KIF20A|KIF18B	0
GO Cellular Components	GO:0035580	specific granule lumen	-2.1	CHIT1|ELANE|PRG3|RETN	0
GO Molecular Functions	GO:0003777	microtubule motor activity	-2.6	DNAH8|KIF23|KIF14|KIF20A|KIF18B	0
GO Molecular Functions	GO:0008009	chemokine activity	-2.5	CXCL10|PF4|CCL19	0
GO Molecular Functions	GO:0003774	cytoskeletal motor activity	-2.3	DNAH8|KIF23|KIF14|KIF20A|MYO15A|KIF18B	0
KEGG Pathway	hsa04061	Viral protein interaction with cytokine and cytokine receptor	-2.2	IL18|CXCL10|PF4|CCL19	0

## Sheet: liver-male-specific gene-230
Category	GO	Description	LogP	Hits	Log(q-value)
GO Biological Processes	GO:0006836	neurotransmitter transport	-7.1	SEPTIN5|SLC6A1|SLC22A1|SYN1|SYT4|TH|CADPS|NRXN1|NRXN2|SV2B|UNC13A|SLC17A7|SLC6A17	-3.3
GO Biological Processes	GO:0061564	axon development	-5.7	CNR1|CNTN1|CRMP1|GLI2|LAMC2|MAPT|NCAM1|NEFH|NR4A2|OPHN1|POU4F2|UCHL1|NRXN1|TUBB3|CHL1|NFASC|ATP8A2|CNTN5|CRTAC1|BCL11B	-2
GO Biological Processes	GO:0001505	regulation of neurotransmitter levels	-5.6	CNR1|GPER1|SEPTIN5|SLC6A1|SLC22A1|SYN1|SYP|SYT4|TH|CADPS|NRXN1|NRXN2|UNC13A|MOXD1	-2
GO Biological Processes	GO:0007268	chemical synaptic transmission	-5.1	CNR1|GRIN1|KCNC4|MPZ|SEPTIN5|SLC6A1|SYN1|SYT4|TH|CADPS|NRXN1|NRXN2|GABBR2|SV2B|UNC13A|NSG1|SLC17A7|SLC12A5	-1.7
GO Biological Processes	GO:0098916	anterograde trans-synaptic signaling	-5.1	CNR1|GRIN1|KCNC4|MPZ|SEPTIN5|SLC6A1|SYN1|SYT4|TH|CADPS|NRXN1|NRXN2|GABBR2|SV2B|UNC13A|NSG1|SLC17A7|SLC12A5	-1.7
GO Biological Processes	GO:0099536	synaptic signaling	-5	CNR1|GRIN1|KCNC4|MPZ|SEPTIN5|SLC6A1|SYN1|SYT4|TH|CADPS|NRXN1|NRXN2|GABBR2|SV2B|UNC13A|NSG1|SLC17A7|SLC12A5|PRR7	-1.6
GO Biological Processes	GO:0099537	trans-synaptic signaling	-4.8	CNR1|GRIN1|KCNC4|MPZ|SEPTIN5|SLC6A1|SYN1|SYT4|TH|CADPS|NRXN1|NRXN2|GABBR2|SV2B|UNC13A|NSG1|SLC17A7|SLC12A5	-1.5
GO Biological Processes	GO:0007610	behavior	-4.7	CNR1|CNTN1|FOS|GRIN1|MAPT|NR4A2|SEPTIN5|SCN2A|SLC6A1|SYT4|TH|UCHL1|ZIC1|FOSL1|NRXN1|NRXN2|GDF15|CHL1|SHANK1|ATP8A2|SLC4A10|SLC12A5	-1.5
GO Biological Processes	GO:0007409	axonogenesis	-4.7	CNTN1|CRMP1|GLI2|LAMC2|NCAM1|NEFH|NR4A2|OPHN1|POU4F2|UCHL1|NRXN1|TUBB3|CHL1|NFASC|ATP8A2|CNTN5|BCL11B	-1.5
GO Biological Processes	GO:0099003	vesicle-mediated transport in synapse	-4.5	OPHN1|SEPTIN5|SYN1|SYP|TH|CADPS|SNAP91|UNC13A|NSG1|SLC17A7	-1.4
GO Biological Processes	GO:0031175	neuron projection development	-4.4	CNR1|CNTN1|CRMP1|GLI2|LAMC2|MAPT|NCAM1|NEFH|NR4A2|OPHN1|POU4F2|UCHL1|NRXN1|TUBB3|CHL1|STMN2|NFASC|PHGDH|SHANK1|ATP8A2|CNTN5|CRTAC1|SLC12A5|BCL11B	-1.4
GO Biological Processes	GO:0030277	maintenance of gastrointestinal epithelium	-4.3	MUC2|TFF2|TFF3|MUC13	-1.4
GO Biological Processes	GO:0051412	response to corticosterone	-4.3	FOS|NTRK3|TH|FOSL1	-1.4
GO Biological Processes	GO:0007411	axon guidance	-4.3	CNTN1|CRMP1|GLI2|LAMC2|NCAM1|OPHN1|POU4F2|NRXN1|TUBB3|CHL1|NFASC|CNTN5|BCL11B	-1.4
GO Biological Processes	GO:0097485	neuron projection guidance	-4.3	CNTN1|CRMP1|GLI2|LAMC2|NCAM1|OPHN1|POU4F2|NRXN1|TUBB3|CHL1|NFASC|CNTN5|BCL11B	-1.4
GO Biological Processes	GO:0048667	cell morphogenesis involved in neuron differentiation	-4.2	CNTN1|CRMP1|GLI2|LAMC2|NCAM1|NEFH|NR4A2|OPHN1|POU4F2|UCHL1|NRXN1|TUBB3|CHL1|NFASC|SHANK1|ATP8A2|CNTN5|BCL11B	-1.3
GO Biological Processes	GO:0099504	synaptic vesicle cycle	-4	OPHN1|SEPTIN5|SYN1|SYP|TH|CADPS|SNAP91|UNC13A|SLC17A7	-1.1
GO Biological Processes	GO:0006935	chemotaxis	-3.9	CCR1|CNTN1|CRMP1|GLI2|LAMC2|NCAM1|OPHN1|POU4F2|CCL25|CXCL6|SCG2|FOSL1|NRXN1|TUBB3|CHL1|NFASC|CNTN5|BCL11B	-1.1
GO Biological Processes	GO:0042330	taxis	-3.9	CCR1|CNTN1|CRMP1|GLI2|LAMC2|NCAM1|OPHN1|POU4F2|CCL25|CXCL6|SCG2|FOSL1|NRXN1|TUBB3|CHL1|NFASC|CNTN5|BCL11B	-1.1
GO Biological Processes	GO:0051385	response to mineralocorticoid	-3.9	FOS|GPER1|NTRK3|TH|FOSL1	-1.1
GO Biological Processes	GO:0007586	digestion	-3.9	FABP2|MUC2|SI|TFF2|TFF3|MUC13|ENPP7	-1
GO Biological Processes	GO:0050890	cognition	-3.8	CNR1|FOS|GRIN1|MAPT|SCN2A|SLC6A1|SYT4|TH|FOSL1|NRXN1|NRXN2|CHL1|SHANK1|SLC12A5	-1
GO Biological Processes	GO:0007611	learning or memory	-3.8	CNR1|FOS|GRIN1|MAPT|SCN2A|SLC6A1|SYT4|TH|FOSL1|NRXN1|NRXN2|SHANK1|SLC12A5	-1
GO Biological Processes	GO:0099643	signal release from synapse	-3.7	SEPTIN5|SYN1|SYT4|CADPS|NRXN1|NRXN2|UNC13A	-0.95
GO Biological Processes	GO:0007269	neurotransmitter secretion	-3.7	SEPTIN5|SYN1|SYT4|CADPS|NRXN1|NRXN2|UNC13A	-0.95
GO Biological Processes	GO:0050804	modulation of chemical synaptic transmission	-3.7	CNR1|GPER1|GRIN1|MAPT|OPHN1|SEPTIN5|SLC6A1|SYN1|SYP|SYT4|NRXN1|UNC13A|NPTXR|NSG1|SHANK1|CELF4|SLC4A10	-0.95
GO Biological Processes	GO:0099177	regulation of trans-synaptic signaling	-3.7	CNR1|GPER1|GRIN1|MAPT|OPHN1|SEPTIN5|SLC6A1|SYN1|SYP|SYT4|NRXN1|UNC13A|NPTXR|NSG1|SHANK1|CELF4|SLC4A10	-0.95
GO Biological Processes	GO:0048812	neuron projection morphogenesis	-3.7	CNTN1|CRMP1|GLI2|LAMC2|NCAM1|NEFH|NR4A2|OPHN1|POU4F2|UCHL1|NRXN1|TUBB3|CHL1|NFASC|SHANK1|ATP8A2|CNTN5|BCL11B	-0.93
GO Biological Processes	GO:0120039	plasma membrane bounded cell projection morphogenesis	-3.6	CNTN1|CRMP1|GLI2|LAMC2|NCAM1|NEFH|NR4A2|OPHN1|POU4F2|UCHL1|NRXN1|TUBB3|CHL1|NFASC|SHANK1|ATP8A2|CNTN5|BCL11B	-0.92
GO Biological Processes	GO:0048858	cell projection morphogenesis	-3.6	CNTN1|CRMP1|GLI2|LAMC2|NCAM1|NEFH|NR4A2|OPHN1|POU4F2|UCHL1|NRXN1|TUBB3|CHL1|NFASC|SHANK1|ATP8A2|CNTN5|BCL11B	-0.9
GO Biological Processes	GO:0060052	neurofilament cytoskeleton organization	-3.5	NEFH|INA|ATP8A2	-0.83
GO Biological Processes	GO:0035725	sodium ion transmembrane transport	-3.5	SCN2A|SLC6A1|SLC17A7|SLC4A10|SLC4A11|SLC24A5|SLC6A19|SLC6A17	-0.83
GO Biological Processes	GO:0007612	learning	-3.4	FOS|GRIN1|SLC6A1|TH|FOSL1|NRXN1|NRXN2|SHANK1|SLC12A5	-0.8
GO Biological Processes	GO:0000904	cell morphogenesis involved in differentiation	-3.4	CNTN1|CRMP1|GLI2|LAMC2|NCAM1|NEFH|NR4A2|OPHN1|POU4F2|UCHL1|NRXN1|TUBB3|CHL1|NFASC|SHANK1|ATP8A2|CNTN5|BCL11B|SRCIN1	-0.8
GO Biological Processes	GO:0032990	cell part morphogenesis	-3.4	CNTN1|CRMP1|GLI2|LAMC2|NCAM1|NEFH|NR4A2|OPHN1|POU4F2|UCHL1|NRXN1|TUBB3|CHL1|NFASC|SHANK1|ATP8A2|CNTN5|BCL11B	-0.8
GO Biological Processes	GO:0010669	epithelial structure maintenance	-3.4	MUC2|TFF2|TFF3|MUC13	-0.8
GO Biological Processes	GO:0050808	synapse organization	-3.4	MAPT|NEFH|OPHN1|SLC6A1|SYN1|PPFIA2|INA|NRXN1|NRXN2|UNC13A|NFASC|SHANK1|CNTN5	-0.8
GO Biological Processes	GO:0006971	hypotonic response	-3.3	SLC12A5|TRPV4|SLC4A11	-0.76
GO Biological Processes	GO:0007420	brain development	-3.2	CNTN1|GLI2|GRIN1|MSX1|NR4A2|OPHN1|TH|ZIC1|ZIC2|ALDH1A2|SPHK1|TBX19|INA|PADI2|NFASC|SATB2|PHGDH|CNTN5|SLC17A7|SLC4A10|BCL11B|DCLK2|SLC6A17	-0.62
GO Biological Processes	GO:0042755	eating behavior	-3.2	TH|UCHL1|GDF15|ATP8A2	-0.62
GO Biological Processes	GO:0030534	adult behavior	-3.1	NR4A2|SEPTIN5|UCHL1|ZIC1|NRXN1|NRXN2|CHL1|SHANK1	-0.62
GO Biological Processes	GO:0021953	central nervous system neuron differentiation	-3.1	GLI2|MAPT|NR4A2|OPHN1|SPOCK1|SATB2|SLC4A10|BCL11B|DCLK2	-0.62
GO Biological Processes	GO:0045104	intermediate filament cytoskeleton organization	-3.1	NEFM|NEFH|INA|ATP8A2|KRT20	-0.62
GO Biological Processes	GO:0045103	intermediate filament-based process	-3.1	NEFM|NEFH|INA|ATP8A2|KRT20	-0.58
GO Biological Processes	GO:0035176	social behavior	-3	SEPTIN5|TH|NRXN1|NRXN2|SHANK1	-0.56
GO Biological Processes	GO:0051703	biological process involved in intraspecies interaction between organisms	-3	SEPTIN5|TH|NRXN1|NRXN2|SHANK1	-0.56
GO Biological Processes	GO:0045109	intermediate filament organization	-3	NEFM|NEFH|INA|KRT20	-0.56
GO Biological Processes	GO:0098655	cation transmembrane transport	-2.9	GRIN1|KCNA2|KCNC4|KCNS3|SCN2A|SLC6A1|SLC15A1|SLC22A1|PANX1|SLC17A7|SLC4A10|SLC12A5|TRPV4|ORAI2|SLC4A11|CALHM5|SLC24A5|SLC6A19|SLC6A17	-0.44
GO Biological Processes	GO:0060322	head development	-2.9	CNTN1|GLI2|GRIN1|MSX1|NR4A2|OPHN1|TH|ZIC1|ZIC2|ALDH1A2|SPHK1|TBX19|INA|PADI2|NFASC|SATB2|PHGDH|CNTN5|SLC17A7|SLC4A10|BCL11B|DCLK2|SLC6A17	-0.44
GO Biological Processes	GO:2000300	regulation of synaptic vesicle exocytosis	-2.9	CNR1|SEPTIN5|SYN1|SYP|SYT4	-0.44
GO Biological Processes	GO:0071625	vocalization behavior	-2.8	NRXN1|NRXN2|SHANK1	-0.44
GO Biological Processes	GO:0046189	phenol-containing compound biosynthetic process	-2.8	NR4A2|PMEL|TH|MOXD1	-0.44
GO Biological Processes	GO:0022600	digestive system process	-2.8	FABP2|MUC2|TFF2|TFF3|MUC13	-0.39
GO Biological Processes	GO:0045672	positive regulation of osteoclast differentiation	-2.8	CCR1|FOS|POU4F2	-0.37
GO Biological Processes	GO:0048172	regulation of short-term neuronal synaptic plasticity	-2.8	SYP|SYT4|SLC4A10	-0.37
GO Biological Processes	GO:0046928	regulation of neurotransmitter secretion	-2.7	CNR1|GPER1|SEPTIN5|SYN1|SYP|SYT4	-0.36
GO Biological Processes	GO:0006954	inflammatory response	-2.7	CD6|CD40|CCR1|FOS|GPER1|MAPT|MEP1B|PTGER3|CCL25|CXCL6|SCG2|SPHK1|TICAM1|ACOD1	-0.33
GO Biological Processes	GO:0023061	signal release	-2.7	SEPTIN5|SYN1|SYT4|CADPS|NRXN1|NRXN2|UNC13A|TRPV4	-0.32
GO Biological Processes	GO:0030001	metal ion transport	-2.7	CCR1|GRIN1|KCNA2|KCNC4|KCNS3|LCN2|SCN2A|SLC6A1|PANX1|SLC17A7|SLC4A10|SLC12A5|TRPV4|ORAI2|SLC4A11|SLC24A5|SLC6A19|SLC6A17	-0.3
GO Biological Processes	GO:0032989	cellular component morphogenesis	-2.6	CNTN1|CRMP1|GLI2|LAMC2|NCAM1|NEFH|NR4A2|OPHN1|POU4F2|UCHL1|NRXN1|TUBB3|CHL1|NFASC|SHANK1|ATP8A2|CNTN5|BCL11B	-0.3
GO Biological Processes	GO:0099173	postsynapse organization	-2.6	NEFH|OPHN1|INA|NRXN1|NRXN2|SHANK1	-0.28
GO Biological Processes	GO:0007613	memory	-2.6	CNR1|MAPT|SCN2A|SLC6A1|SYT4|TH|SHANK1	-0.27
GO Biological Processes	GO:0098662	inorganic cation transmembrane transport	-2.6	GRIN1|KCNA2|KCNC4|KCNS3|SCN2A|SLC6A1|SLC15A1|PANX1|SLC17A7|SLC4A10|SLC12A5|TRPV4|ORAI2|SLC4A11|SLC24A5|SLC6A19|SLC6A17	-0.27
GO Biological Processes	GO:0097106	postsynaptic density organization	-2.6	OPHN1|NRXN1|NRXN2	-0.26
GO Biological Processes	GO:0000902	cell morphogenesis	-2.6	CNTN1|CRMP1|GLI2|LAMC2|MSX1|NCAM1|NEFH|NR4A2|OPHN1|POU4F2|UCHL1|NRXN1|TUBB3|CHL1|NFASC|SHANK1|ATP8A2|CNTN5|BCL11B|SRCIN1	-0.25
GO Biological Processes	GO:0014059	regulation of dopamine secretion	-2.5	CNR1|KCNA2|SYT4|SYT13	-0.23
GO Biological Processes	GO:0009713	catechol-containing compound biosynthetic process	-2.5	NR4A2|TH|MOXD1	-0.22
GO Biological Processes	GO:0099084	postsynaptic specialization organization	-2.5	OPHN1|NRXN1|NRXN2	-0.22
GO Biological Processes	GO:0042423	catecholamine biosynthetic process	-2.5	NR4A2|TH|MOXD1	-0.22
GO Biological Processes	GO:0021879	forebrain neuron differentiation	-2.5	SATB2|SLC4A10|BCL11B|DCLK2	-0.21
GO Biological Processes	GO:0070098	chemokine-mediated signaling pathway	-2.5	CCR1|CCL25|CXCL6|TFF2	-0.21
GO Biological Processes	GO:1900015	regulation of cytokine production involved in inflammatory response	-2.5	CD6|IL1R2|TICAM1|NLRC3	-0.18
GO Biological Processes	GO:0010996	response to auditory stimulus	-2.4	NRXN1|NRXN2|ATP8A2	-0.18
GO Biological Processes	GO:0030318	melanocyte differentiation	-2.4	USP13|MREG|SLC24A5	-0.18
GO Biological Processes	GO:0006814	sodium ion transport	-2.4	SCN2A|SLC6A1|SLC17A7|SLC4A10|SLC4A11|SLC24A5|SLC6A19|SLC6A17	-0.17
GO Biological Processes	GO:0051588	regulation of neurotransmitter transport	-2.4	CNR1|GPER1|SEPTIN5|SYN1|SYP|SYT4	-0.17
GO Biological Processes	GO:0017156	calcium-ion regulated exocytosis	-2.4	SYT4|CADPS|UNC13A|SYT13	-0.17
GO Biological Processes	GO:0050926	regulation of positive chemotaxis	-2.3	ANGPT2|NTRK3|SCG2	-0.079
GO Biological Processes	GO:0034330	cell junction organization	-2.3	MAPT|NEFH|OPHN1|SLC6A1|SYN1|PPFIA2|INA|NRXN1|NRXN2|CORO2B|UNC13A|NFASC|SHANK1|CNTN5|TRPV4	-0.075
GO Biological Processes	GO:0007631	feeding behavior	-2.3	FOS|TH|UCHL1|GDF15|ATP8A2	-0.075
GO Biological Processes	GO:0006970	response to osmotic stress	-2.3	SCN2A|TH|SLC12A5|TRPV4|SLC4A11	-0.075
GO Biological Processes	GO:0098815	modulation of excitatory postsynaptic potential	-2.3	GRIN1|NRXN1|SHANK1|CELF4	-0.075
GO Biological Processes	GO:0007204	positive regulation of cytosolic calcium ion concentration	-2.3	CCR1|CNR1|GPER1|GRIN1|PTGER3|TRPV4|P2RY8	-0.063
GO Biological Processes	GO:0050885	neuromuscular process controlling balance	-2.3	POU4F2|NRXN1|SHANK1|RBFOX1	-0.045
GO Biological Processes	GO:0051966	regulation of synaptic transmission, glutamatergic	-2.2	CNR1|GRIN1|OPHN1|NRXN1|UNC13A	-0.031
GO Biological Processes	GO:1990868	response to chemokine	-2.2	CCR1|CCL25|CXCL6|TFF2	0
GO Biological Processes	GO:1990869	cellular response to chemokine	-2.2	CCR1|CCL25|CXCL6|TFF2	0
GO Biological Processes	GO:0098660	inorganic ion transmembrane transport	-2.1	GRIN1|KCNA2|KCNC4|KCNS3|SCN2A|SLC6A1|SLC15A1|PANX1|SLC17A7|SLC4A10|SLC12A5|TRPV4|ORAI2|SLC4A11|SLC24A5|SLC6A19|SLC6A17	0
GO Biological Processes	GO:0031109	microtubule polymerization or depolymerization	-2.1	MAPT|STMN2|CENPJ|TRPV4	0
GO Biological Processes	GO:0048663	neuron fate commitment	-2.1	GLI2|NTRK3|SATB2|BCL11B	0
GO Biological Processes	GO:0035418	protein localization to synapse	-2.1	NRXN1|NRXN2|NSG1|SHANK1	0
GO Biological Processes	GO:0018958	phenol-containing compound metabolic process	-2.1	DIO2|NR4A2|PMEL|TH|MOXD1	0
GO Biological Processes	GO:0042417	dopamine metabolic process	-2.1	NR4A2|TH|MOXD1	0
GO Biological Processes	GO:0035115	embryonic forelimb morphogenesis	-2.1	MSX1|ALDH1A2|RSPO2	0
GO Biological Processes	GO:0032940	secretion by cell	-2.1	CCR1|SEPTIN5|SYN1|SYT4|SCG2|CADPS|NRXN1|NRXN2|UNC13A|SYT13|TRPV4|SRCIN1	0
GO Biological Processes	GO:0021954	central nervous system neuron development	-2.1	GLI2|MAPT|NR4A2|SLC4A10|DCLK2	0
GO Biological Processes	GO:0021872	forebrain generation of neurons	-2.1	SATB2|SLC4A10|BCL11B|DCLK2	0
GO Biological Processes	GO:0009612	response to mechanical stimulus	-2.1	ANGPT2|CD40|FOS|FOSL1|NRXN1|NRXN2|ATP8A2|TRPV4	0
GO Biological Processes	GO:0019226	transmission of nerve impulse	-2.1	GPER1|KCNA2|SCN2A|NFASC	0
GO Biological Processes	GO:0019228	neuronal action potential	-2.1	GPER1|KCNA2|SCN2A	0
GO Biological Processes	GO:0006775	fat-soluble vitamin metabolic process	-2.1	RBP2|FGF23|ALDH1A2	0
GO Biological Processes	GO:0140352	export from cell	-2	CCR1|KCNA2|SEPTIN5|SYN1|SYT4|SCG2|CADPS|NRXN1|NRXN2|UNC13A|SYT13|TRPV4|SRCIN1	0
GO Biological Processes	GO:0048639	positive regulation of developmental growth	-2	MAPT|POU4F2|SYT4|AGR2|UNC13A|ZFPM2|ATP8A2	0
GO Biological Processes	GO:0001764	neuron migration	-2	MARK1|NTRK3|NR4A2|SPOCK1|CHL1|SATB2	0
GO Biological Processes	GO:0034612	response to tumor necrosis factor	-2	CD40|GSDME|GPER1|CCL25|SPHK1|ADAMTS12|ACOD1	0
GO Biological Processes	GO:0048168	regulation of neuronal synaptic plasticity	-2	GRIN1|SYP|SYT4|SLC4A10	0
GO Cellular Components	GO:0030424	axon	-9.5	CNR1|CNTN1|CRMP1|GPER1|GRIN1|KCNA2|KCNC4|MAPT|NEFM|NEFH|NTRK3|OPHN1|SCN2A|SLC6A1|SPOCK1|SYN1|SYP|SYT4|TH|UCHL1|MAP3K12|PPFIA2|TUBB3|STMN2|UNC13A|NMNAT2|NFASC|CNTN5|SLC4A10|SYT13|TRPV4|SRCIN1|NRSN1	-5.4
GO Cellular Components	GO:0098793	presynapse	-9.4	CNR1|CNTN1|GPER1|GRIN1|KCNA2|OPHN1|SEPTIN5|SCN2A|SLC6A1|SLC22A1|VAMP1|SYN1|SYP|SYT4|TH|FOSL1|PPFIA2|CADPS|SPHK1|NRXN1|NRXN2|SNAP91|SV2B|UNC13A|CNTN5|SLC17A7|SLC4A10|SRCIN1|SLC6A17	-5.4
GO Cellular Components	GO:0042734	presynaptic membrane	-5.7	CNR1|CNTN1|GPER1|KCNA2|SCN2A|SLC6A1|SYP|FOSL1|NRXN1|SNAP91|UNC13A|CNTN5	-2
GO Cellular Components	GO:0150034	distal axon	-5.5	CNR1|CRMP1|GPER1|GRIN1|KCNA2|MAPT|OPHN1|SYP|TH|MAP3K12|TUBB3|STMN2|UNC13A|SLC4A10|TRPV4|NRSN1	-2
GO Cellular Components	GO:0097060	synaptic membrane	-4.9	CNR1|CNTN1|GPER1|GRIN1|KCNA2|NTRK3|SCN2A|SLC6A1|SYP|FOSL1|NRXN1|GABBR2|SNAP91|UNC13A|NSG1|SHANK1|CNTN5|PRR7	-1.5
GO Cellular Components	GO:0099160	postsynaptic intermediate filament cytoskeleton	-4.8	NEFM|NEFH|INA	-1.5
GO Cellular Components	GO:0070382	exocytic vesicle	-4.6	GRIN1|SEPTIN5|VAMP1|SYN1|SYP|SYT4|TH|SNAP91|SV2B|UNC13A|SLC17A7|SYT13|SLC6A17	-1.5
GO Cellular Components	GO:0008021	synaptic vesicle	-4.4	GRIN1|SEPTIN5|VAMP1|SYN1|SYP|SYT4|TH|SNAP91|SV2B|UNC13A|SLC17A7|SLC6A17	-1.4
GO Cellular Components	GO:0097418	neurofibrillary tangle	-4.4	MAPT|NEFM|NEFH	-1.4
GO Cellular Components	GO:0044306	neuron projection terminus	-3.9	GPER1|GRIN1|KCNA2|OPHN1|SYP|TH|UCHL1|UNC13A|SLC4A10	-1.1
GO Cellular Components	GO:0099501	exocytic vesicle membrane	-3.7	VAMP1|SYN1|SYP|SYT4|SV2B|UNC13A|SLC17A7|SLC6A17	-0.93
GO Cellular Components	GO:0030672	synaptic vesicle membrane	-3.7	VAMP1|SYN1|SYP|SYT4|SV2B|UNC13A|SLC17A7|SLC6A17	-0.93
GO Cellular Components	GO:0005796	Golgi lumen	-3.6	MUC2|WNT6|FGF23|HS3ST1|MUC13|MUC17|ZG16	-0.92
GO Cellular Components	GO:0043679	axon terminus	-3.6	GPER1|GRIN1|KCNA2|OPHN1|SYP|TH|UNC13A|SLC4A10	-0.9
GO Cellular Components	GO:0045177	apical part of cell	-3.5	FABP2|SI|SLC15A1|SLC22A1|CHL1|CLCA4|MREG|MUC13|SLC4A10|TRPV4|SLC4A11|CPO|MUC17|PLB1|SLC6A19|PLET1	-0.87
GO Cellular Components	GO:0030425	dendrite	-3.5	GPER1|GRIN1|KCNA2|KCNC4|MAPT|MARK1|OPHN1|SYN1|SYT4|TH|PPFIA2|TUBB3|CHL1|NFASC|FBXO2|NSG1|SHANK1|SLC4A10|SLC12A5|SRCIN1|PRR7	-0.86
GO Cellular Components	GO:0097447	dendritic tree	-3.5	GPER1|GRIN1|KCNA2|KCNC4|MAPT|MARK1|OPHN1|SYN1|SYT4|TH|PPFIA2|TUBB3|CHL1|NFASC|FBXO2|NSG1|SHANK1|SLC4A10|SLC12A5|SRCIN1|PRR7	-0.85
GO Cellular Components	GO:0005883	neurofilament	-3.5	NEFM|NEFH|INA	-0.83
GO Cellular Components	GO:0099571	postsynaptic cytoskeleton	-3.5	NEFM|NEFH|INA	-0.83
GO Cellular Components	GO:0098563	intrinsic component of synaptic vesicle membrane	-3.4	SYN1|SYP|SYT4|SLC17A7|SLC6A17	-0.8
GO Cellular Components	GO:0098794	postsynapse	-3.3	CNTN1|GPER1|GRIN1|MAPT|NEFM|NEFH|NTRK3|OPHN1|SLC6A1|SPOCK1|SYN1|PPFIA2|INA|GABBR2|FBXO2|NSG1|SHANK1|SLC4A10|SRCIN1|PRR7|SLC6A17	-0.76
GO Cellular Components	GO:0016324	apical plasma membrane	-3.3	SI|SLC15A1|SLC22A1|CLCA4|MREG|MUC13|SLC4A10|TRPV4|SLC4A11|CPO|MUC17|PLB1|SLC6A19|PLET1	-0.76
GO Cellular Components	GO:0043195	terminal bouton	-3.1	GRIN1|OPHN1|SYP|TH|UNC13A	-0.62
GO Cellular Components	GO:0098889	intrinsic component of presynaptic membrane	-3	CNR1|CNTN1|KCNA2|SCN2A|SLC6A1|CNTN5	-0.56
GO Cellular Components	GO:0030285	integral component of synaptic vesicle membrane	-3	SYP|SYT4|SLC17A7|SLC6A17	-0.5
GO Cellular Components	GO:0048786	presynaptic active zone	-2.9	GPER1|SYN1|SYP|PPFIA2|UNC13A|SLC17A7	-0.5
GO Cellular Components	GO:0098992	neuronal dense core vesicle	-2.9	SYT4|SCG2|CADPS	-0.5
GO Cellular Components	GO:0033268	node of Ranvier	-2.8	SCN2A|SPOCK1|NFASC	-0.44
GO Cellular Components	GO:0044304	main axon	-2.7	KCNA2|MAPT|SCN2A|SPOCK1|NFASC	-0.37
GO Cellular Components	GO:0030133	transport vesicle	-2.6	GRIN1|SEPTIN5|VAMP1|SYN1|SYP|SYT4|TH|SNAP91|SV2B|UNC13A|SLC17A7|SYT13|NRSN1|SLC6A17	-0.27
GO Cellular Components	GO:0031225	anchored component of membrane	-2.6	CNTN1|NCAM1|SYN1|TFPI|CNTN5|CPO|PLET1	-0.26
GO Cellular Components	GO:0005882	intermediate filament	-2.5	GPER1|NEFM|NEFH|INA|KRT20	-0.19
GO Cellular Components	GO:0030426	growth cone	-2.5	CNR1|CRMP1|MAPT|MAP3K12|TUBB3|STMN2|TRPV4|NRSN1	-0.19
GO Cellular Components	GO:0030427	site of polarized growth	-2.4	CNR1|CRMP1|MAPT|MAP3K12|TUBB3|STMN2|TRPV4|NRSN1	-0.14
GO Cellular Components	GO:0098685	Schaffer collateral - CA1 synapse	-2.2	NEFH|SYN1|SYP|INA|SHANK1	-0.008
GO Cellular Components	GO:0031045	dense core granule	-2.2	SYT4|SCG2|CADPS	-0.00045
GO Cellular Components	GO:0032585	multivesicular body membrane	-2.1	PMEL|NSG1|GIMAP5	0
GO Cellular Components	GO:0060076	excitatory synapse	-2.1	GRIN1|SYP|SHANK1|SLC17A7	0
GO Molecular Functions	GO:0015293	symporter activity	-4.5	SLC6A1|SLC15A1|SLC22A1|SLC17A7|SLC4A10|SLC12A5|SLC4A11|SLC24A5|SLC6A19|SLC6A17	-1.4
GO Molecular Functions	GO:0008289	lipid binding	-3.4	CD6|GSDME|FABP2|FABP6|GPER1|MAPT|MARK1|OPHN1|RBP2|SYP|SYT4|CADPS|ALDH1A2|SPHK1|MELK|SNAP91|UNC13A|BPIFA1|MREG|SYT13|TRPV4|PRR7|CGAS	-0.8
GO Molecular Functions	GO:0046873	metal ion transmembrane transporter activity	-3.4	CNR1|GRIN1|KCNA2|KCNC4|KCNS3|SCN2A|SLC6A1|SLC22A1|PANX1|SLC17A7|SLC4A10|SLC12A5|TRPV4|ORAI2|SLC4A11|SLC24A5	-0.8
GO Molecular Functions	GO:0005261	cation channel activity	-3.1	CNR1|GRIN1|KCNA2|KCNC4|KCNS3|SCN2A|PANX1|SLC12A5|TRPV4|ORAI2|SLC4A11|CALHM5|SLC24A5	-0.62
GO Molecular Functions	GO:0022803	passive transmembrane transporter activity	-2.9	CNR1|GRIN1|KCNA2|KCNC4|KCNS3|SCN2A|CLCA4|PANX1|PANX2|SLC12A5|TRPV4|ORAI2|SLC4A11|CALHM5|SLC24A5	-0.45
GO Molecular Functions	GO:0015267	channel activity	-2.9	CNR1|GRIN1|KCNA2|KCNC4|KCNS3|SCN2A|CLCA4|PANX1|PANX2|SLC12A5|TRPV4|ORAI2|SLC4A11|CALHM5|SLC24A5	-0.45
GO Molecular Functions	GO:0022890	inorganic cation transmembrane transporter activity	-2.8	CNR1|GRIN1|KCNA2|KCNC4|KCNS3|SCN2A|SLC6A1|SLC15A1|SLC22A1|PANX1|SLC17A7|SLC4A10|SLC12A5|TRPV4|ORAI2|SLC4A11|CALHM5|SLC24A5	-0.43
GO Molecular Functions	GO:0015377	cation:chloride symporter activity	-2.8	SLC6A1|SLC22A1|SLC12A5	-0.37
GO Molecular Functions	GO:0015291	secondary active transmembrane transporter activity	-2.7	SLC6A1|SLC15A1|SLC22A1|SLC17A7|SLC4A10|SLC12A5|SLC4A11|SLC24A5|SLC6A19|SLC6A17	-0.35
GO Molecular Functions	GO:0005216	ion channel activity	-2.7	CNR1|GRIN1|KCNA2|KCNC4|KCNS3|SCN2A|CLCA4|PANX1|SLC12A5|TRPV4|ORAI2|SLC4A11|CALHM5|SLC24A5	-0.33
GO Molecular Functions	GO:0005504	fatty acid binding	-2.5	FABP2|FABP6|RBP2|PRR7	-0.23
GO Molecular Functions	GO:0015296	anion:cation symporter activity	-2.4	SLC6A1|SLC22A1|SLC12A5	-0.18
GO Molecular Functions	GO:0050145	nucleoside monophosphate kinase activity	-2.4	AK1|AK4|CARD11	-0.18
GO Molecular Functions	GO:0008324	cation transmembrane transporter activity	-2.4	CNR1|GRIN1|KCNA2|KCNC4|KCNS3|SCN2A|SLC6A1|SLC15A1|SLC22A1|PANX1|SLC17A7|SLC4A10|SLC12A5|TRPV4|ORAI2|SLC4A11|CALHM5|SLC24A5	-0.17
GO Molecular Functions	GO:0015294	solute:cation symporter activity	-2.4	SLC6A1|SLC15A1|SLC22A1|SLC17A7|SLC4A10|SLC12A5	-0.17
GO Molecular Functions	GO:0015318	inorganic molecular entity transmembrane transporter activity	-2.3	CNR1|GRIN1|KCNA2|KCNC4|KCNS3|SCN2A|SLC6A1|SLC15A1|SLC22A1|CLCA4|PANX1|SLC17A7|SLC4A10|SLC12A5|TRPV4|ORAI2|SLC4A11|CALHM5|SLC24A5	-0.075
GO Molecular Functions	GO:0015081	sodium ion transmembrane transporter activity	-2.2	SCN2A|SLC6A1|SLC22A1|SLC17A7|SLC4A10|SLC4A11|SLC24A5	-0.0032
GO Molecular Functions	GO:0005262	calcium channel activity	-2.2	CNR1|GRIN1|PANX1|TRPV4|ORAI2|SLC24A5	0
GO Molecular Functions	GO:0005200	structural constituent of cytoskeleton	-2.1	NEFM|NEFH|INA|TUBB3|KRT20	0
KEGG Pathway	hsa04514	Cell adhesion molecules	-4.1	CD6|CD40|CNTN1|MPZ|NCAM1|PVR|NRXN1|NRXN2|NFASC	-1.6
KEGG Pathway	hsa04657	IL-17 signaling pathway	-3.2	FOS|LCN2|MAPK4|MAPK10|CXCL6|FOSL1	-0.91
KEGG Pathway	hsa04727	GABAergic synapse	-2.1	GNAO1|GNG4|SLC6A1|GABBR2|SLC12A5	0

## Sheet: liver-female-specific-gene-458
Category	GO	Description	LogP	Hits	Log(q-value)
GO Biological Processes	GO:0002250	adaptive immune response	-5.5	BMX|CD3G|GPR183|IGLC1|IL13RA2|ZAP70|IL18R1|IGHV3-23|IGLV10-54|IGLV9-49|IGLV7-46|IGLV6-57|IGLV5-39|IGLV1-50|IGKV1-39|TRAT1|TLR8|SUSD4|SLAMF7|CRACR2A|SH2D1B|GAPT	-1.4
GO Biological Processes	GO:0071173	spindle assembly checkpoint signaling	-4.8	CDC20|TRIP13|SPDL1|ZWILCH|SPC25|NUF2|SPC24	-1.3
GO Biological Processes	GO:0071174	mitotic spindle checkpoint signaling	-4.8	CDC20|TRIP13|SPDL1|ZWILCH|SPC25|NUF2|SPC24	-1.3
GO Biological Processes	GO:0007094	mitotic spindle assembly checkpoint signaling	-4.8	CDC20|TRIP13|SPDL1|ZWILCH|SPC25|NUF2|SPC24	-1.3
GO Biological Processes	GO:0033047	regulation of mitotic sister chromatid segregation	-4.8	BIRC5|CDC20|TRIP13|SPDL1|ZWILCH|CDCA8|SPC25|NUF2|SPC24	-1.3
GO Biological Processes	GO:0031577	spindle checkpoint signaling	-4.7	CDC20|TRIP13|SPDL1|ZWILCH|SPC25|NUF2|SPC24	-1.3
GO Biological Processes	GO:0051784	negative regulation of nuclear division	-4.7	CDC20|RAD1|TRIP13|SPDL1|ZWILCH|SPC25|NUF2|SPC24	-1.3
GO Biological Processes	GO:0045841	negative regulation of mitotic metaphase/anaphase transition	-4.6	CDC20|TRIP13|SPDL1|ZWILCH|SPC25|NUF2|SPC24	-1.3
GO Biological Processes	GO:0033046	negative regulation of sister chromatid segregation	-4.5	CDC20|TRIP13|SPDL1|ZWILCH|SPC25|NUF2|SPC24	-1.3
GO Biological Processes	GO:0033048	negative regulation of mitotic sister chromatid segregation	-4.5	CDC20|TRIP13|SPDL1|ZWILCH|SPC25|NUF2|SPC24	-1.3
GO Biological Processes	GO:2000816	negative regulation of mitotic sister chromatid separation	-4.5	CDC20|TRIP13|SPDL1|ZWILCH|SPC25|NUF2|SPC24	-1.3
GO Biological Processes	GO:1902100	negative regulation of metaphase/anaphase transition of cell cycle	-4.5	CDC20|TRIP13|SPDL1|ZWILCH|SPC25|NUF2|SPC24	-1.3
GO Biological Processes	GO:0051985	negative regulation of chromosome segregation	-4.4	CDC20|TRIP13|SPDL1|ZWILCH|SPC25|NUF2|SPC24	-1.3
GO Biological Processes	GO:1905819	negative regulation of chromosome separation	-4.4	CDC20|TRIP13|SPDL1|ZWILCH|SPC25|NUF2|SPC24	-1.3
GO Biological Processes	GO:0045839	negative regulation of mitotic nuclear division	-3.9	CDC20|TRIP13|SPDL1|ZWILCH|SPC25|NUF2|SPC24	-0.86
GO Biological Processes	GO:0002377	immunoglobulin production	-3.8	IGLV10-54|IGLV9-49|IGLV7-46|IGLV6-57|IGLV5-39|IGLV1-50|IGKV1-39|GAPT	-0.85
GO Biological Processes	GO:0002440	production of molecular mediator of immune response	-3.8	IGLV10-54|IGLV9-49|IGLV7-46|IGLV6-57|IGLV5-39|IGLV1-50|IGKV1-39|GAPT	-0.81
GO Biological Processes	GO:0030071	regulation of mitotic metaphase/anaphase transition	-3.6	BIRC5|CDC20|CENPE|TRIP13|SPDL1|ZWILCH|CDCA8|SPC25|NUF2|SPC24	-0.63
GO Biological Processes	GO:1902099	regulation of metaphase/anaphase transition of cell cycle	-3.5	BIRC5|CDC20|CENPE|TRIP13|SPDL1|ZWILCH|CDCA8|SPC25|NUF2|SPC24	-0.56
GO Biological Processes	GO:0010965	regulation of mitotic sister chromatid separation	-3.5	BIRC5|CDC20|CENPE|TRIP13|SPDL1|ZWILCH|CDCA8|SPC25|NUF2|SPC24	-0.53
GO Biological Processes	GO:0007283	spermatogenesis	-3.2	CFTR|DEFB1|SPINK1|TYRO3|NEURL1|TRIP13|DLEC1|PRSS21|IFT27|DDX25|YBX2|SPA17|TTC12|SPATA6L|MNS1|PARP11|SOX17|CFAP43|ZNF541|SPATC1L|LRRK2|GTSF1|KLC3|PDILT	-0.32
GO Biological Processes	GO:0007286	spermatid development	-3.1	CFTR|DEFB1|SPINK1|NEURL1|TRIP13|DDX25|TTC12|MNS1|CFAP43|KLC3|PDILT	-0.25
GO Biological Processes	GO:0033045	regulation of sister chromatid segregation	-3.1	BIRC5|CDC20|CENPE|TRIP13|SPDL1|ZWILCH|CDCA8|SPC25|NUF2|SPC24	-0.25
GO Biological Processes	GO:0048232	male gamete generation	-3	CFTR|DEFB1|SPINK1|TYRO3|NEURL1|TRIP13|DLEC1|PRSS21|IFT27|DDX25|YBX2|SPA17|TTC12|SPATA6L|MNS1|PARP11|SOX17|CFAP43|ZNF541|SPATC1L|LRRK2|GTSF1|KLC3|PDILT	-0.16
GO Biological Processes	GO:0048515	spermatid differentiation	-3	CFTR|DEFB1|SPINK1|NEURL1|TRIP13|DDX25|TTC12|MNS1|CFAP43|KLC3|PDILT	-0.16
GO Biological Processes	GO:1905818	regulation of chromosome separation	-3	BIRC5|CDC20|CENPE|TRIP13|SPDL1|ZWILCH|CDCA8|SPC25|NUF2|SPC24	-0.15
GO Biological Processes	GO:0006689	ganglioside catabolic process	-3	NEU2|NEU3|NEU4	-0.14
GO Biological Processes	GO:0009151	purine deoxyribonucleotide metabolic process	-2.9	DCK|XDH|NUDT18|AK9	-0.13
GO Biological Processes	GO:0120316	sperm flagellum assembly	-2.9	NEURL1|TTC12|MNS1|CFAP43|KLC3	-0.087
GO Biological Processes	GO:0098813	nuclear chromosome segregation	-2.8	BIRC5|CDC20|CENPE|MSH5|TRIP13|P3H4|SPAG5|SPDL1|CDCA8|SPC25|NUF2|PSRC1|SYCE1|SPC24	-0.028
GO Biological Processes	GO:0010756	positive regulation of plasminogen activation	-2.8	MELTF|CLEC3B|PLGRKT	-0.028
GO Biological Processes	GO:0002793	positive regulation of peptide secretion	-2.7	ADORA1|CASR|CFTR|SCT|SPINK1|NR0B2|BAIAP3|FFAR4	0
GO Biological Processes	GO:0045742	positive regulation of epidermal growth factor receptor signaling pathway	-2.5	ADORA1|ADRA2A|PDE6G|NEURL1|NEU3	0
GO Biological Processes	GO:0007281	germ cell development	-2.5	CFTR|DEFB1|IHH|SPINK1|NEURL1|TRIP13|DDX25|YBX2|PAQR5|TTC12|MNS1|CFAP43|KLC3|PDILT	0
GO Biological Processes	GO:0051983	regulation of chromosome segregation	-2.5	BIRC5|CDC20|CENPE|TRIP13|SPDL1|ZWILCH|CDCA8|SPC25|NUF2|SPC24	0
GO Biological Processes	GO:0018108	peptidyl-tyrosine phosphorylation	-2.5	BMX|EPHB3|FLT3|IL15|MST1R|TYRO3|ZAP70|DYRK4|AATK|PBK|TTBK1	0
GO Biological Processes	GO:0003341	cilium movement	-2.4	DNAH11|NEURL1|SPA17|TTC12|MNS1|DNAI4|CFAP43|DNHD1|KLC3|RSPH9	0
GO Biological Processes	GO:0044458	motile cilium assembly	-2.4	NEURL1|TTC12|MNS1|CFAP43|KLC3|RSPH9	0
GO Biological Processes	GO:1901186	positive regulation of ERBB signaling pathway	-2.4	ADORA1|ADRA2A|PDE6G|NEURL1|NEU3	0
GO Biological Processes	GO:0007276	gamete generation	-2.4	AFP|CFTR|DEFB1|IHH|SPINK1|TYRO3|NEURL1|TRIP13|DLEC1|PRSS21|IFT27|DDX25|YBX2|SPA17|PAQR5|TTC12|SPATA6L|MNS1|PARP11|SOX17|CFAP43|ZNF541|SPATC1L|LRRK2|GTSF1|KLC3|PDILT	0
GO Biological Processes	GO:0018212	peptidyl-tyrosine modification	-2.4	BMX|EPHB3|FLT3|IL15|MST1R|TYRO3|ZAP70|DYRK4|AATK|PBK|TTBK1	0
GO Biological Processes	GO:0010954	positive regulation of protein processing	-2.4	MELTF|CNTN2|CLEC3B|PLGRKT	0
GO Biological Processes	GO:0007051	spindle organization	-2.3	BIRC5|CDC20|CENPE|SPAG5|TPX2|CDCA8|CEP72|SPC25|NUF2|EFHC1|HAUS1	0
GO Biological Processes	GO:0045741	positive regulation of epidermal growth factor-activated receptor activity	-2.3	ADORA1|ADRA2A|NEURL1	0
GO Biological Processes	GO:0006954	inflammatory response	-2.3	ADORA1|ADRA2A|ALOX5AP|BDKRB2|IL15|NFATC4|NOS2|PF4|PRKD1|CCL4|CCL11|IL18R1|KL|CHST4|CYSLTR1|TLR8|PLGRKT|NFKBID|NLRP6|FFAR4|PLA2G4B	0
GO Biological Processes	GO:1903319	positive regulation of protein maturation	-2.3	MELTF|CNTN2|CLEC3B|PLGRKT	0
GO Biological Processes	GO:0007288	sperm axoneme assembly	-2.3	NEURL1|TTC12|MNS1|CFAP43	0
GO Biological Processes	GO:0060314	regulation of ryanodine-sensitive calcium-release channel activity	-2.3	HRC|PLN|JPH2|JSRP1	0
GO Biological Processes	GO:0008608	attachment of spindle microtubules to kinetochore	-2.3	CENPE|SPC25|NUF2|SPC24	0
GO Biological Processes	GO:0051783	regulation of nuclear division	-2.3	BIRC5|CDC20|RAD1|TRIP13|SPDL1|ZWILCH|CDCA8|SPC25|NUF2|SPC24	0
GO Biological Processes	GO:0007088	regulation of mitotic nuclear division	-2.3	BIRC5|CDC20|TRIP13|SPDL1|ZWILCH|CDCA8|SPC25|NUF2|SPC24	0
GO Biological Processes	GO:0007052	mitotic spindle organization	-2.3	BIRC5|CDC20|CENPE|TPX2|CDCA8|SPC25|NUF2|EFHC1	0
GO Biological Processes	GO:2001251	negative regulation of chromosome organization	-2.2	CDC20|TRIP13|SPDL1|ZWILCH|SPC25|NUF2|SPC24	0
GO Biological Processes	GO:0009162	deoxyribonucleoside monophosphate metabolic process	-2.2	DCK|TYMS|XDH|DNPH1	0
GO Biological Processes	GO:0048240	sperm capacitation	-2.2	CFTR|DEFB1|SPINK1	0
GO Biological Processes	GO:0072498	embryonic skeletal joint development	-2.2	IHH|WNT9A|OSR1	0
GO Biological Processes	GO:0090235	regulation of metaphase plate congression	-2.2	BIRC5|SPAG5|CDCA8	0
GO Biological Processes	GO:0032536	regulation of cell projection size	-2.2	CNTN2|WNT7B|USH1C	0
GO Biological Processes	GO:0060285	cilium-dependent cell motility	-2.2	DNAH11|NEURL1|TTC12|MNS1|CFAP43|EFHC1|KLC3|RSPH9	0
GO Biological Processes	GO:0001539	cilium or flagellum-dependent cell motility	-2.2	DNAH11|NEURL1|TTC12|MNS1|CFAP43|EFHC1|KLC3|RSPH9	0
GO Biological Processes	GO:0007586	digestion	-2.2	ADRA2A|CTRB1|MUC4|SCT|GCNT3|INAVA|ADM2	0
GO Biological Processes	GO:0090277	positive regulation of peptide hormone secretion	-2.2	CASR|CFTR|SCT|SPINK1|NR0B2|BAIAP3|FFAR4	0
GO Biological Processes	GO:0043410	positive regulation of MAPK cascade	-2.1	ADORA1|ADRA2A|CASR|GPR183|FLT3|GRM1|MST1R|MT3|PDE6G|PLA2G5|CCL4|CCL11|TRAF5|WNT7B|XDH|KL|SHC2|INAVA|CRACR2A|DIXDC1|LRRK2|FFAR4	0
GO Biological Processes	GO:0007059	chromosome segregation	-2.1	BIRC5|CDC20|CENPE|MSH5|TRIP13|P3H4|SPAG5|SPDL1|CDCA8|HJURP|SPC25|NUF2|PSRC1|SYCE1|SPC24	0
GO Biological Processes	GO:0032413	negative regulation of ion transmembrane transporter activity	-2.1	ADRA2A|PLN|KCNAB1|GNB5|HECW1|OSR1	0
GO Biological Processes	GO:0009313	oligosaccharide catabolic process	-2.1	NEU2|NEU3|NEU4	0
GO Biological Processes	GO:0046479	glycosphingolipid catabolic process	-2.1	NEU2|NEU3|NEU4	0
GO Biological Processes	GO:0051988	regulation of attachment of spindle microtubules to kinetochore	-2.1	BIRC5|SPAG5|CDCA8	0
GO Biological Processes	GO:0002791	regulation of peptide secretion	-2.1	ADORA1|ADRA2A|CASR|CFTR|EFNA5|NOS2|SCT|SPINK1|NR0B2|BAIAP3|FFAR4	0
GO Biological Processes	GO:0048469	cell maturation	-2.1	CFTR|DEFB1|IHH|IL15|SPINK1|CNTN2|TYMS|TRIP13|TFCP2L1|NTN4	0
GO Biological Processes	GO:0000075	cell cycle checkpoint signaling	-2.1	CDC20|RAD1|TRIP13|SPDL1|ZWILCH|SPC25|NUF2|RHNO1|TICRR|SPC24	0
GO Biological Processes	GO:0043271	negative regulation of ion transport	-2.1	ADORA1|ADRA2A|GABRE|PLN|SPINK1|KCNAB1|GNB5|HECW1|OSR1	0
GO Biological Processes	GO:0090087	regulation of peptide transport	-2.1	ADORA1|ADRA2A|CASR|CFTR|EFNA5|NOS2|SCT|SPINK1|NR0B2|BAIAP3|FFAR4	0
GO Biological Processes	GO:0045776	negative regulation of blood pressure	-2	ADORA1|GLP1R|NOS2|KL|ADM2	0
GO Biological Processes	GO:0009394	2'-deoxyribonucleotide metabolic process	-2	DCK|TYMS|XDH|NUDT18|AK9	0
GO Biological Processes	GO:0046631	alpha-beta T cell activation	-2	CD3G|GPR183|IL15|ZAP70|IL18R1|CRACR2A	0
GO Biological Processes	GO:1901019	regulation of calcium ion transmembrane transporter activity	-2	ADRA2A|HRC|PLN|GNB5|JPH2|CRACR2A|JSRP1	0
GO Biological Processes	GO:0060049	regulation of protein glycosylation	-2	IL15|MT3|SLC51B	0
GO Biological Processes	GO:0050912	detection of chemical stimulus involved in sensory perception of taste	-2	RTP4|RTP3|FFAR4	0
GO Biological Processes	GO:0090128	regulation of synapse maturation	-2	CDC20|NFATC4|NEURL1	0
GO Cellular Components	GO:0019814	immunoglobulin complex	-9.8	IGLC1|IGHV3-23|IGLV10-54|IGLV9-49|IGLV7-46|IGLV6-57|IGLV5-39|IGLV1-50|IGKV1-39	-5.4
GO Cellular Components	GO:0031262	Ndc80 complex	-4.5	SPC25|NUF2|SPC24	-1.3
GO Cellular Components	GO:0097729	9+2 motile cilium	-2.9	DEFB1|DNAH11|IFT27|SPA17|SPATA6L|MNS1|CCDC181|CFAP43|SPATC1L|RSPH9	-0.12
GO Cellular Components	GO:0031617	NMS complex	-2.8	SPC25|NUF2|SPC24	-0.028
GO Cellular Components	GO:0005604	basement membrane	-2.7	COL4A3|COL7A1|COL17A1|EFNA5|LAD1|NTN4|SMOC2|FRAS1|FREM1	0
GO Cellular Components	GO:0036379	myofilament	-2.4	TNNC1|TNNT2|MYOM1|LMOD1	0
GO Cellular Components	GO:0031225	anchored component of membrane	-2.4	ART4|CA4|EFNA3|EFNA5|MELTF|CNTN2|XPNPEP2|PRSS21|GFRA4|EEPD1	0
GO Cellular Components	GO:0005875	microtubule associated complex	-2.3	BIRC5|LRP8|DNAH11|CDCA8|KIF15|DNAI4|TTBK1|HAUS1|KIF19|DNHD1|KLC3	0
GO Cellular Components	GO:0031514	motile cilium	-2.2	DEFB1|DNAH11|IFT27|SPA17|SPATA6L|MNS1|CCDC181|DNAI4|CFAP43|SPATC1L|KLC3|RSPH9	0
GO Cellular Components	GO:0042101	T cell receptor complex	-2.2	CD3G|ZAP70|TRAT1	0
GO Cellular Components	GO:0005930	axoneme	-2.2	DNAH11|MNS1|DNAI4|CFAP43|ARL6|EFHC1|KIF19|DNHD1|RSPH9	0
GO Cellular Components	GO:0097014	ciliary plasm	-2.1	DNAH11|MNS1|DNAI4|CFAP43|ARL6|EFHC1|KIF19|DNHD1|RSPH9	0
GO Cellular Components	GO:0043235	receptor complex	-2	ADRA2A|CD3G|EPHB3|FLT3|GABRA3|GABRE|GRM1|IL13RA2|ITGA2B|MST1R|TRAF5|TYRO3|ZAP70|LRP8|IL18R1|IL27RA|TSPAN32|TRAT1|CACNG8|GFRA4	0
GO Molecular Functions	GO:0052796	exo-alpha-(2->8)-sialidase activity	-3.9	NEU2|NEU3|NEU4	-0.86
GO Molecular Functions	GO:0052795	exo-alpha-(2->6)-sialidase activity	-3.9	NEU2|NEU3|NEU4	-0.86
GO Molecular Functions	GO:0016997	alpha-sialidase activity	-3.9	NEU2|NEU3|NEU4	-0.86
GO Molecular Functions	GO:0052794	exo-alpha-(2->3)-sialidase activity	-3.9	NEU2|NEU3|NEU4	-0.86
GO Molecular Functions	GO:0004308	exo-alpha-sialidase activity	-3.9	NEU2|NEU3|NEU4	-0.86
GO Molecular Functions	GO:0004713	protein tyrosine kinase activity	-2.6	BMX|EFNA3|EPHB3|FLT3|MST1R|TYRO3|ZAP70|DYRK4|AATK|PBK|TTBK1	0
GO Molecular Functions	GO:0005504	fatty acid binding	-2.2	AFP|ALOX5AP|FABP5|UCP1|FFAR4	0
GO Molecular Functions	GO:0015631	tubulin binding	-2.2	BIRC5|CENPE|FEZ1|DLEC1|SPAG5|TPX2|MTUS2|KIF15|CCDC181|PSRC1|DIXDC1|NAV3|EFHC1|LRRK2|KIF19|NLRP5|KLC3|SPC24|FMN1|SVBP	0
GO Molecular Functions	GO:0048018	receptor ligand activity	-2.2	EFNA5|IL10|IL15|NRTN|PF4|SCT|CCL4|CCL11|TG|WNT7B|WNT9A|SEMA3B|KL|SEMA4F|FAM3B|ADM2|SCGB3A1	0
GO Molecular Functions	GO:0030020	extracellular matrix structural constituent conferring tensile strength	-2.1	COL4A3|COL7A1|COL9A2|COL17A1|COL21A1	0
GO Molecular Functions	GO:0030546	signaling receptor activator activity	-2.1	EFNA5|IL10|IL15|NRTN|PF4|SCT|CCL4|CCL11|TG|WNT7B|WNT9A|SEMA3B|KL|SEMA4F|FAM3B|ADM2|SCGB3A1	0
KEGG Pathway	Herpes simplex virus 1 infection	hsa05168	-2.8	TRAF5|ZNF23|ZNF226|ZNF227|ZNF286A|ZNF624|ZNF649|ZNF343|ZNF419|ZNF613|ZNF34|ZNF684|ZNF569|ZNF564|ZNF567|ZNF584|ZNF568|ZNF470	-0.25
KEGG Pathway	Phototransduction	hsa04744	-2.3	PDE6G|GRK1|SAG	-0.092
