# Supplementary material for: Sex differences in gene expression and alternative splicing in the Chinese horseshoe bat
Source: PeerJ. 2023 Apr 24;11:e15231. doi: 10.7717/peerj.15231 (PMC10135408; doi:10.7717/peerj.15231)
Supplement: Table S4 — Significant terms with the q-value of 0.05 were shown in bold. Highlighted terms are those representatives after removing the redundancy. Log (q-value) of −1.3 is equal to q-value of 0.05. Terms with uncorrected p < 0.01 were also shown. Log (p-value) of −2.2 is equal to p-value of 0.01. [file peerj-11-15231-s004.xlsx]

## Sheet: Male-specific genes
Category	GO	Description	LogP	Hits	Log(q-value)
GO Biological Processes	GO:0007586	digestion	-6.7	FABP2|SI|TFF2|TFF3|MUC13	-2.4
GO Biological Processes	GO:0030277	maintenance of gastrointestinal epithelium	-5.7	TFF2|TFF3|MUC13	-1.7
GO Biological Processes	GO:0022600	digestive system process	-5.5	FABP2|TFF2|TFF3|MUC13	-1.7
GO Biological Processes	GO:0010669	epithelial structure maintenance	-5	TFF2|TFF3|MUC13	-1.3
GO Biological Processes	GO:0015908	fatty acid transport	-3.8	FABP2|FABP6|RBP2	-0.35
GO Biological Processes	GO:0048871	multicellular organismal homeostasis	-2.7	TFF2|TFF3|BPIFA1|MUC13	0
GO Biological Processes	GO:0001894	tissue homeostasis	-2.3	TFF2|TFF3|MUC13	0
GO Biological Processes	GO:0015849	organic acid transport	-2.1	FABP2|FABP6|RBP2	0
GO Biological Processes	GO:0060249	anatomical structure homeostasis	-2.1	TFF2|TFF3|MUC13	0
GO Cellular Components	GO:0045177	apical part of cell	-4.3	FABP2|SI|SLC15A1|CLCA4|MUC13|MUC17	-0.72
GO Cellular Components	GO:0016324	apical plasma membrane	-3.6	SI|SLC15A1|CLCA4|MUC13|MUC17	-0.2
GO Cellular Components	GO:0005796	Golgi lumen	-3.4	MUC13|MUC17|ZG16	-0.044
GO Cellular Components	GO:0005903	brush border	-3.1	TMPRSS15|SI|SLC15A1	0
GO Cellular Components	GO:0098862	cluster of actin-based cell projections	-2.6	TMPRSS15|SI|SLC15A1	0
GO Molecular Functions	GO:0005504	fatty acid binding	-4.3	FABP2|FABP6|RBP2	-0.72
GO Molecular Functions	GO:0033293	monocarboxylic acid binding	-3.8	FABP2|FABP6|RBP2	-0.35
GO Molecular Functions	GO:0004222	metalloendopeptidase activity	-3.3	MEP1A|MEP1B|CLCA4	-0.0027
GO Molecular Functions	GO:0031406	carboxylic acid binding	-2.7	FABP2|FABP6|RBP2	0
GO Molecular Functions	GO:0004175	endopeptidase activity	-2.7	MEP1A|MEP1B|TMPRSS15|CLCA4	0
GO Molecular Functions	GO:0008237	metallopeptidase activity	-2.6	MEP1A|MEP1B|CLCA4	0
GO Molecular Functions	GO:0030246	carbohydrate binding	-2.3	SI|REG4|ZG16	0
GO Molecular Functions	GO:0008233	peptidase activity	-2	MEP1A|MEP1B|TMPRSS15|CLCA4	0
