# Supplementary material for: Sex differences in gene expression and alternative splicing in the Chinese horseshoe bat
Source: PeerJ. 2023 Apr 24;11:e15231. doi: 10.7717/peerj.15231 (PMC10135408; doi:10.7717/peerj.15231)
Supplement: Table S6 — Significant terms and pathways with the q-value of 0.05 were shown in bold. Highlighted terms are those representatives after removing the redundancy. Log (q-value) of −1.3 is equal to q-value of 0.05. Terms and pathways with uncorrected p < 0.01 were also shown. Log (p-value) of −2.2 is equal to p-value of 0.01. [file peerj-11-15231-s006.xlsx]

## Sheet: male-biased-gene_share_279
Category	GO	Description	LogP	Hits	Log(q-value)
GO Biological Processes	GO:0009896	positive regulation of catabolic process	-8	AKT2|ZFP36L1|GSK3B|HTT|HIF1A|LRP1|MSN|NFE2L2|PAFAH1B2|PRKCD|ZFP36|RAB7A|AXIN1|PUM1|HUWE1|TOB1|TRIB1|ARIH2|WWP1|TNRC6B|ATG2A|PABPC1|AGO2|WAC|SAMD4B|PNPLA2|TP53INP2|TMEM259|PATL1|MEX3D	-4
GO Biological Processes	GO:0031331	positive regulation of cellular catabolic process	-7.6	AKT2|ZFP36L1|GSK3B|HTT|HIF1A|LRP1|MSN|NFE2L2|PAFAH1B2|PRKCD|ZFP36|AXIN1|PUM1|TOB1|TRIB1|ARIH2|TNRC6B|ATG2A|PABPC1|AGO2|WAC|SAMD4B|PNPLA2|TP53INP2|TMEM259|PATL1|MEX3D	-3.8
GO Biological Processes	GO:1900153	positive regulation of nuclear-transcribed mRNA catabolic process, deadenylation-dependent decay	-7	ZFP36L1|ZFP36|TOB1|TNRC6B|PABPC1|AGO2	-3.4
GO Biological Processes	GO:0045661	regulation of myoblast differentiation	-6.1	ACTB|ZFP36L1|FLOT2|MAP3K5|PPARD|ARID1A|LRRC8A|ARID1B|ARID2	-2.6
GO Biological Processes	GO:1900151	regulation of nuclear-transcribed mRNA catabolic process, deadenylation-dependent decay	-5.4	ZFP36L1|ZFP36|TOB1|TNRC6B|PABPC1|AGO2	-2.2
GO Biological Processes	GO:0060213	positive regulation of nuclear-transcribed mRNA poly(A) tail shortening	-5.4	ZFP36|TOB1|TNRC6B|PABPC1|AGO2	-2.2
GO Biological Processes	GO:0061014	positive regulation of mRNA catabolic process	-5.3	ZFP36L1|ZFP36|PUM1|TOB1|TNRC6B|PABPC1|AGO2|SAMD4B|PATL1|MEX3D	-2.1
GO Biological Processes	GO:0030097	hemopoiesis	-5.2	ABL1|ATP6AP1|BCR|ZFP36L1|CSF1R|EEF2|EGR1|EPAS1|HIF1A|JAK1|MITF|MYH9|NOTCH2|PML|SRF|TGFBR2|GAB2|WDR1|PTBP3|ARIH2|NCOA6|SIN3A|HIPK2|LRRC8A|PREX1|HIPK1	-2
GO Biological Processes	GO:0060211	regulation of nuclear-transcribed mRNA poly(A) tail shortening	-5.1	ZFP36|TOB1|TNRC6B|PABPC1|AGO2	-2
GO Biological Processes	GO:0016570	histone modification	-4.9	ACTB|CREBBP|PER1|PHF2|PRKCD|TBL1X|BAP1|HUWE1|CARM1|SRCAP|PAXIP1|NCOA6|USP22|SIN3A|BRPF3|WAC|KDM3B|GATAD2A|ASH1L|MIDEAS|TADA2B	-1.8
GO Biological Processes	GO:0007167	enzyme-linked receptor protein signaling pathway	-4.8	ABL1|AKT2|CDH5|CSF1R|EGR1|GSK3B|IL6ST|IL13RA1|JAK1|LOX|LRP1|NEDD9|PML|SKI|SPTBN1|TGFBR2|ZFAND5|ZYX|RAPGEF2|MTSS1|GAB2|MVP|GIT1|HIPK2|SULF2|ZMIZ1	-1.8
GO Biological Processes	GO:0060341	regulation of cellular localization	-4.8	ACTB|AKT2|APOD|ARHGAP1|ZFP36L1|DAG1|GSK3B|HIF1A|LRP1|MAP1A|MSN|NUMA1|PML|PPARD|PRKCD|SDC4|SPTBN1|SREBF2|ZFP36|RAB7A|BAP1|PPFIA1|GAB2|HUWE1|ARIH2|NUP62|PTPN23|SIN3A|TRAPPC12|ILRUN	-1.8
GO Biological Processes	GO:0045859	regulation of protein kinase activity	-4.8	ABL1|ACTB|CDKN1A|CSF1R|DAG1|DUSP1|DVL3|EGR1|HTT|MAP3K5|NEDD9|PRKAR1A|PRKCD|SDC4|TGFBR2|AXIN1|TRAF4|RAPGEF2|DAZAP2|MVP|TRIB1|TAB2|NUP62|ERRFI1|WNK1|MOB3A|CCNYL1	-1.8
GO Biological Processes	GO:0048534	hematopoietic or lymphoid organ development	-4.7	ABL1|ATP6AP1|BCR|ZFP36L1|CSF1R|EEF2|EGR1|EPAS1|HIF1A|JAK1|MITF|MYH9|NOTCH2|PML|SRF|TGFBR2|GAB2|WDR1|PTBP3|ARIH2|NCOA6|SIN3A|HIPK2|LRRC8A|PREX1|HIPK1	-1.7
GO Biological Processes	GO:0150105	protein localization to cell-cell junction	-4.7	ACTB|ACTG1|CDH5|JAK1|TJP1	-1.7
GO Biological Processes	GO:0030155	regulation of cell adhesion	-4.6	ABL1|ACTB|ACTG1|APOD|ZFHX3|DAG1|DUSP1|FLOT2|GSK3B|IL6ST|JAK1|NEDD9|PML|PRKAR1A|PRKCD|SDC4|SRF|TGFBR2|TJP1|ARID1A|TRIOBP|CLASP1|PTPN23|ZMIZ1|ARID1B|PREX1|WNK1|ARID2|ACER2	-1.7
GO Biological Processes	GO:0045663	positive regulation of myoblast differentiation	-4.6	ACTB|MAP3K5|ARID1A|LRRC8A|ARID1B|ARID2	-1.7
GO Biological Processes	GO:1903706	regulation of hemopoiesis	-4.5	ABL1|ACTB|ZFP36L1|HIF1A|INPP5D|LOX|MITF|NFKBIA|NOTCH2|TGFBR2|ZFP36|ARID1A|TRIB1|TOB2|BRPF3|ZMIZ1|ARID1B|ARID2	-1.6
GO Biological Processes	GO:0043619	regulation of transcription from RNA polymerase II promoter in response to oxidative stress	-4.5	EPAS1|HIF1A|NFE2L2|SIN3A	-1.6
GO Biological Processes	GO:1902396	protein localization to bicellular tight junction	-4.5	ACTG1|CDH5|TJP1	-1.6
GO Biological Processes	GO:0030336	negative regulation of cell migration	-4.4	APOD|BCR|DAG1|DUSP1|LRP1|MITF|NFE2L2|PPARD|SRF|S1PR2|TRIB1|CLASP1|PTPN23|SIN3A|SAP130|ARID2	-1.5
GO Biological Processes	GO:0045860	positive regulation of protein kinase activity	-4.3	ABL1|CDKN1A|CSF1R|DAG1|DVL3|EGR1|MAP3K5|NEDD9|PRKCD|SDC4|TGFBR2|AXIN1|TRAF4|RAPGEF2|DAZAP2|TAB2|WNK1|MOB3A|CCNYL1	-1.5
GO Biological Processes	GO:0030099	myeloid cell differentiation	-4.3	ATP6AP1|CSF1R|EPAS1|MITF|MYH9|NOTCH2|PML|SRF|TGFBR2|GAB2|WDR1|PTBP3|NCOA6|HIPK2	-1.5
GO Biological Processes	GO:0001944	vasculature development	-4.3	ACTG1|APOD|ZFP36L1|CDH5|DAG1|EGR1|EPAS1|HIF1A|LOX|LRP1|MYH9|NOTCH2|SHB|SRF|TGFBR2|ZFAND5|RAPGEF2|PAXIP1|ANKRD17|ANGPTL4|ERRFI1|ZMIZ1|ARID2	-1.5
GO Biological Processes	GO:1903313	positive regulation of mRNA metabolic process	-4.2	ZFP36L1|ZFP36|PUM1|TOB1|TNRC6B|PABPC1|AGO2|SAMD4B|PATL1|MEX3D	-1.4
GO Biological Processes	GO:0002520	immune system development	-4.2	ABL1|ATP6AP1|BCR|ZFP36L1|CSF1R|EEF2|EGR1|EPAS1|HIF1A|JAK1|MITF|MYH9|NOTCH2|PML|SRF|TGFBR2|GAB2|WDR1|PTBP3|ARIH2|NCOA6|SIN3A|HIPK2|LRRC8A|PREX1|HIPK1	-1.4
GO Biological Processes	GO:2000146	negative regulation of cell motility	-4.2	APOD|BCR|DAG1|DUSP1|LRP1|MITF|NFE2L2|PPARD|SRF|S1PR2|TRIB1|CLASP1|PTPN23|SIN3A|SAP130|ARID2	-1.4
GO Biological Processes	GO:0014912	negative regulation of smooth muscle cell migration	-4.1	LRP1|NFE2L2|PPARD|S1PR2|TRIB1	-1.3
GO Biological Processes	GO:1902117	positive regulation of organelle assembly	-4.1	ARHGAP35|GSK3B|HTT|MSN|NUMA1|SDC4|ATG2A|NUP62	-1.3
GO Biological Processes	GO:1902414	protein localization to cell junction	-4	ACTB|ACTG1|CDH5|JAK1|KIF5C|MAP1A|TJP1|STX1B	-1.3
GO Biological Processes	GO:0051271	negative regulation of cellular component movement	-4	APOD|BCR|DAG1|DUSP1|LRP1|MITF|NFE2L2|PPARD|SRF|S1PR2|TRIB1|CLASP1|PTPN23|SIN3A|SAP130|ARID2	-1.3
GO Biological Processes	GO:0090092	regulation of transmembrane receptor protein serine/threonine kinase signaling pathway	-4	ABL1|CDH5|CREBBP|LOX|LRP1|NOTCH2|NUMA1|SKI|TGFBR2|AXIN1|TOB1|SIN3A|HIPK2|SAP130|BCL9L	-1.3
GO Biological Processes	GO:2000113	negative regulation of cellular macromolecule biosynthetic process	-4	ZFP36L1|GSK3B|ZFP36|PUM1|TOB1|TNRC6B|AGO2|SAMD4B|CPEB4|PATL1|ACER2|MEX3D	-1.3
GO Biological Processes	GO:0043488	regulation of mRNA stability	-4	ZFP36L1|PRKCD|ZFP36|PUM1|TOB1|TNRC6B|PABPC1|AGO2|SAMD4B|PATL1|MEX3D	-1.3
GO Biological Processes	GO:0030036	actin cytoskeleton organization	-3.9	ABL1|ACTB|ACTG1|BCR|ARHGAP35|MEF2A|MYH9|NEDD9|PRKAR1A|SPTBN1|SRF|TJP1|ZYX|S1PR2|MTSS1|ELMO1|WDR1|TRIOBP|SPECC1L|CTNNA3|PREX1|MYH14|SSH2	-1.3
GO Biological Processes	GO:0006325	chromatin organization	-3.9	ACTB|HMGA1|PHF2|ARID1A|AXIN1|BAP1|BCL7B|CARM1|SRCAP|USP22|BRD4|BRPF3|UBN1|WAC|KDM3B|GATAD2A|ASH1L|EMSY|ZNFX1|ARID1B|CHD8|TADA2B|ARID2	-1.3
GO Biological Processes	GO:2000819	regulation of nucleotide-excision repair	-3.9	ACTB|ARID1A|BCL7B|ARID1B|ARID2	-1.3
GO Biological Processes	GO:0045766	positive regulation of angiogenesis	-3.9	ABL1|CDH5|HIF1A|JAK1|NFE2L2|TGFBR2|TJP1|AGO2|HIPK2|ANGPTL4|HIPK1	-1.3
GO Biological Processes	GO:1904018	positive regulation of vasculature development	-3.9	ABL1|CDH5|HIF1A|JAK1|NFE2L2|TGFBR2|TJP1|AGO2|HIPK2|ANGPTL4|HIPK1	-1.3
GO Biological Processes	GO:0031032	actomyosin structure organization	-3.9	ACTG1|MEF2A|MYH9|PRKAR1A|SRF|TJP1|ZYX|WDR1|MYH14	-1.3
GO Biological Processes	GO:0043409	negative regulation of MAPK cascade	-3.8	ABL1|DAG1|DUSP1|DUSP6|DUSP8|PER1|PRKCD|TNIP1|NUP62|ERRFI1|ASH1L	-1.3
GO Biological Processes	GO:0045785	positive regulation of cell adhesion	-3.8	ABL1|ACTB|ZFHX3|DAG1|FLOT2|GSK3B|IL6ST|JAK1|NEDD9|SDC4|TGFBR2|TJP1|ARID1A|TRIOBP|PTPN23|ZMIZ1|ARID1B|PREX1|ARID2	-1.3
GO Biological Processes	GO:0031347	regulation of defense response	-3.8	BCR|SERPING1|CDH5|CREBBP|IL6ST|NFE2L2|NFKBIA|NPAS2|PPARD|PRKCD|SEC14L1|ZFP36|ZYX|BAP1|TNIP1|BRD4|SIN3A|GIT1|AKIRIN2|ASH1L|ZNFX1|ILRUN	-1.3
GO Biological Processes	GO:0080135	regulation of cellular response to stress	-3.8	ABL1|ACTB|CREBBP|DUSP1|GSK3B|HIF1A|MAP3K5|NFE2L2|NPAS2|PER1|PML|PPP1R10|PRKCD|ARID1A|AXIN1|BCL7B|TRAF4|PAXIP1|POGZ|PHLPP1|USP22|PPP1R15A|HIPK2|ARID1B|TMEM259|TADA2B|ARID2	-1.3
GO Biological Processes	GO:0051493	regulation of cytoskeleton organization	-3.7	ABL1|ACTG1|CDH5|CSF1R|ARHGAP35|GSK3B|LRP1|MAP1A|NOTCH2|NUMA1|PRKCD|SDC4|SPTBN1|TJP1|PPFIA1|MTSS1|WDR1|TRIOBP|CLASP1|NUP62|GIT1|SSH2	-1.2
GO Biological Processes	GO:0006403	RNA localization	-3.7	ZFP36L1|EIF5A|KIF5C|TGFBR2|ZFP36|SMG7|MVP|NUP62|THOC3|MEX3D|POM121C	-1.2
GO Biological Processes	GO:0032970	regulation of actin filament-based process	-3.7	ABL1|ACTG1|CSF1R|ARHGAP35|LRP1|MYH9|NOTCH2|PRKCD|SDC4|SPTBN1|TJP1|PPFIA1|MTSS1|WDR1|TRIOBP|CLASP1|CTNNA3|SSH2	-1.2
GO Biological Processes	GO:0043487	regulation of RNA stability	-3.7	ZFP36L1|PRKCD|ZFP36|PUM1|TOB1|TNRC6B|PABPC1|AGO2|SAMD4B|PATL1|MEX3D	-1.1
GO Biological Processes	GO:0001568	blood vessel development	-3.6	ACTG1|APOD|ZFP36L1|CDH5|DAG1|EGR1|EPAS1|HIF1A|LOX|LRP1|MYH9|NOTCH2|SHB|SRF|TGFBR2|RAPGEF2|PAXIP1|ANKRD17|ANGPTL4|ZMIZ1|ARID2	-1.1
GO Biological Processes	GO:0051028	mRNA transport	-3.6	ZFP36L1|EIF5A|KIF5C|ZFP36|SMG7|MVP|NUP62|THOC3|POM121C	-1.1
GO Biological Processes	GO:0090398	cellular senescence	-3.6	CDKN1A|HMGA1|MAP3K5|PML|PRKCD|SRF	-1.1
GO Biological Processes	GO:0050657	nucleic acid transport	-3.6	ZFP36L1|EIF5A|KIF5C|TGFBR2|ZFP36|SMG7|MVP|NUP62|THOC3|POM121C	-1.1
GO Biological Processes	GO:0050658	RNA transport	-3.6	ZFP36L1|EIF5A|KIF5C|TGFBR2|ZFP36|SMG7|MVP|NUP62|THOC3|POM121C	-1.1
GO Biological Processes	GO:0008285	negative regulation of cell population proliferation	-3.6	APOD|CDH5|CDKN1A|CSF1R|DUSP1|HMGA1|INPP5D|PML|PPARD|PRKAR1A|SDC4|SKI|SRF|TGFBR2|BAP1|S1PR2|RAPGEF2|MTSS1|TOB1|TRIB1|CHERP|TOB2|NUP62|CLMN|ARID2	-1.1
GO Biological Processes	GO:0007182	common-partner SMAD protein phosphorylation	-3.6	PML|SPTBN1|TGFBR2	-1.1
GO Biological Processes	GO:0061013	regulation of mRNA catabolic process	-3.6	ZFP36L1|PRKCD|ZFP36|PUM1|TOB1|TNRC6B|PABPC1|AGO2|SAMD4B|PATL1|MEX3D	-1.1
GO Biological Processes	GO:0040013	negative regulation of locomotion	-3.5	APOD|BCR|DAG1|DUSP1|LRP1|MITF|NFE2L2|PPARD|SRF|S1PR2|TRIB1|CLASP1|PTPN23|SIN3A|SAP130|ARID2	-1.1
GO Biological Processes	GO:0051236	establishment of RNA localization	-3.5	ZFP36L1|EIF5A|KIF5C|TGFBR2|ZFP36|SMG7|MVP|NUP62|THOC3|POM121C	-1.1
GO Biological Processes	GO:0043549	regulation of kinase activity	-3.5	ABL1|ACTB|CDKN1A|CSF1R|DAG1|DUSP1|DVL3|EGR1|HTT|MAP3K5|NEDD9|PRKAR1A|PRKCD|SDC4|TGFBR2|AXIN1|TRAF4|RAPGEF2|DAZAP2|MVP|TRIB1|TAB2|NUP62|ERRFI1|WNK1|MOB3A|CCNYL1	-1
GO Biological Processes	GO:0035239	tube morphogenesis	-3.5	ABL1|ACTG1|APOD|ZFP36L1|CSF1R|DAG1|DVL3|EPAS1|ARHGAP35|HIF1A|LOX|LRP1|MYH9|NOTCH2|PML|SDC4|SHB|SKI|SRF|TGFBR2|MTSS1|PAXIP1|ANGPTL4|ZMIZ1|ARID2	-1
GO Biological Processes	GO:0070316	regulation of G0 to G1 transition	-3.4	ACTB|ARID1A|BCL7B|ARID1B|ARID2	-1
GO Biological Processes	GO:0071559	response to transforming growth factor beta	-3.4	ABL1|ZFHX3|ZFP36L1|CDH5|PML|SKI|TGFBR2|ZYX|HIPK2|ZMIZ1	-1
GO Biological Processes	GO:1903708	positive regulation of hemopoiesis	-3.4	ACTB|ZFP36L1|INPP5D|NOTCH2|TGFBR2|ARID1A|TRIB1|ZMIZ1|ARID1B|ARID2	-1
GO Biological Processes	GO:1902107	positive regulation of leukocyte differentiation	-3.4	ACTB|ZFP36L1|INPP5D|NOTCH2|TGFBR2|ARID1A|TRIB1|ZMIZ1|ARID1B|ARID2	-1
GO Biological Processes	GO:0018107	peptidyl-threonine phosphorylation	-3.4	GRK2|GSK3B|PRKCD|TGFBR2|HIPK2|WNK1|HIPK1	-1
GO Biological Processes	GO:0061157	mRNA destabilization	-3.4	ZFP36L1|ZFP36|PUM1|AGO2|SAMD4B|PATL1|MEX3D	-1
GO Biological Processes	GO:0032922	circadian regulation of gene expression	-3.4	ZFHX3|EGR1|NPAS2|PER1|PML|HUWE1|NCOA2	-1
GO Biological Processes	GO:1902903	regulation of supramolecular fiber organization	-3.4	ABL1|ACTG1|CDH5|ARHGAP35|MAP1A|NUMA1|PRKCD|SDC4|SPTBN1|TJP1|PPFIA1|MTSS1|WDR1|TRIOBP|CLASP1|GIT1|SSH2	-0.98
GO Biological Processes	GO:0061072	iris morphogenesis	-3.4	HIF1A|HIPK2|HIPK1	-0.98
GO Biological Processes	GO:0070482	response to oxygen levels	-3.4	ATP6AP1|ZFP36L1|CREBBP|EGR1|EPAS1|HIF1A|ND4|NFE2L2|PML|PPARD|SRF|TGFBR2|HIPK2|ANGPTL4|CPEB4	-0.98
GO Biological Processes	GO:0032956	regulation of actin cytoskeleton organization	-3.4	ABL1|ACTG1|CSF1R|ARHGAP35|LRP1|NOTCH2|PRKCD|SDC4|SPTBN1|TJP1|PPFIA1|MTSS1|WDR1|TRIOBP|CLASP1|SSH2	-0.98
GO Biological Processes	GO:0090287	regulation of cellular response to growth factor stimulus	-3.4	ABL1|CDH5|CREBBP|HIF1A|LOX|NOTCH2|NUMA1|SKI|AXIN1|TOB1|SIN3A|HIPK2|SULF2|SAP130|BCL9L	-0.97
GO Biological Processes	GO:0030330	DNA damage response, signal transduction by p53 class mediator	-3.3	CDKN1A|PML|PAXIP1|HIPK2|ACER2	-0.94
GO Biological Processes	GO:0030029	actin filament-based process	-3.3	ABL1|ACTB|ACTG1|BCR|ARHGAP35|MEF2A|MYH9|NEDD9|PRKAR1A|SPTBN1|SRF|TJP1|ZYX|S1PR2|MTSS1|ELMO1|WDR1|TRIOBP|SPECC1L|CTNNA3|PREX1|MYH14|SSH2	-0.93
GO Biological Processes	GO:0050779	RNA destabilization	-3.3	ZFP36L1|ZFP36|PUM1|AGO2|SAMD4B|PATL1|MEX3D	-0.93
GO Biological Processes	GO:0036293	response to decreased oxygen levels	-3.3	ZFP36L1|CREBBP|EGR1|EPAS1|HIF1A|ND4|NFE2L2|PML|PPARD|SRF|TGFBR2|HIPK2|ANGPTL4|CPEB4	-0.91
GO Biological Processes	GO:1905953	negative regulation of lipid localization	-3.3	AKT2|NFKBIA|PPARD|SREBF2|PNPLA2	-0.91
GO Biological Processes	GO:0009611	response to wounding	-3.3	ACTB|ACTG1|APOD|ZFP36L1|SERPING1|CDKN1A|DAG1|ARHGAP35|HIF1A|LOX|MAP3K5|MYH9|NOTCH2|PPARD|SDC4|SRF|TGFBR2|ZFP36	-0.91
GO Biological Processes	GO:0017148	negative regulation of translation	-3.2	ZFP36L1|ZFP36|PUM1|TOB1|TNRC6B|AGO2|SAMD4B|CPEB4|PATL1|MEX3D	-0.9
GO Biological Processes	GO:0033674	positive regulation of kinase activity	-3.2	ABL1|CDKN1A|CSF1R|DAG1|DVL3|EGR1|MAP3K5|NEDD9|PRKCD|SDC4|TGFBR2|AXIN1|TRAF4|RAPGEF2|DAZAP2|TAB2|WNK1|MOB3A|CCNYL1	-0.89
GO Biological Processes	GO:0071900	regulation of protein serine/threonine kinase activity	-3.2	ABL1|ACTB|CDKN1A|CSF1R|DUSP1|DVL3|HTT|MAP3K5|PRKAR1A|PRKCD|AXIN1|RAPGEF2|DAZAP2|TRIB1|NUP62|CCNYL1	-0.86
GO Biological Processes	GO:0042060	wound healing	-3.2	ACTB|ACTG1|SERPING1|CDKN1A|DAG1|ARHGAP35|HIF1A|LOX|MAP3K5|MYH9|NOTCH2|PPARD|SDC4|SRF|TGFBR2	-0.86
GO Biological Processes	GO:0015931	nucleobase-containing compound transport	-3.1	ZFP36L1|EIF5A|KIF5C|TGFBR2|ZFP36|SMG7|MVP|NUP62|LRRC8A|THOC3|POM121C	-0.83
GO Biological Processes	GO:0009792	embryo development ending in birth or egg hatching	-3.1	ABL1|ZFP36L1|DVL3|EPAS1|ARHGAP35|HIF1A|ND4|MYH9|NOTCH2|SDC4|SKI|SRF|TGFBR2|ZFAND5|AXIN1|USP22|SIN3A|AKIRIN2|SULF2|SMG9|ZMIZ1|CHD8|ZNF358	-0.83
GO Biological Processes	GO:0018210	peptidyl-threonine modification	-3.1	GRK2|GSK3B|PRKCD|TGFBR2|HIPK2|WNK1|HIPK1	-0.82
GO Biological Processes	GO:1902105	regulation of leukocyte differentiation	-3.1	ABL1|ACTB|ZFP36L1|INPP5D|MITF|NOTCH2|TGFBR2|ARID1A|TRIB1|TOB2|ZMIZ1|ARID1B|ARID2	-0.8
GO Biological Processes	GO:0007179	transforming growth factor beta receptor signaling pathway	-3.1	CDH5|PML|SKI|TGFBR2|ZYX|HIPK2|ZMIZ1	-0.8
GO Biological Processes	GO:0045815	epigenetic maintenance of chromatin in transcription-competent conformation	-3.1	PHF2|ARID1A|ARID1B	-0.79
GO Biological Processes	GO:0035278	miRNA-mediated gene silencing by inhibition of translation	-3.1	ZFP36|TNRC6B|AGO2	-0.79
GO Biological Processes	GO:0010506	regulation of autophagy	-3	ABL1|ATP6V0A1|GSK3B|HTT|HIF1A|FOXK2|PAFAH1B2|CTSA|SREBF2|TAB2|ATG2A|CLEC16A|WAC|TP53INP2|ACER2	-0.78
GO Biological Processes	GO:0034248	regulation of cellular amide metabolic process	-3	AKT2|ZFP36L1|EEF2|EIF5A|NFE2L2|PER1|PRKCD|ZFP36|PUM1|TOB1|TNRC6B|PPP1R15A|PABPC1|AGO2|SAMD4B|CPEB4|PATL1|MEX3D	-0.78
GO Biological Processes	GO:1903829	positive regulation of protein localization	-3	AKT2|GSK3B|HIF1A|LRP1|MAP1A|MSN|NUMA1|PPARD|PRKCD|SPTBN1|SREBF2|BAP1|HUWE1|ARIH2|NUP62|PTPN23|TRAPPC12|LRRC8A	-0.78
GO Biological Processes	GO:0045637	regulation of myeloid cell differentiation	-3	ZFP36L1|HIF1A|INPP5D|LOX|MITF|NFKBIA|NOTCH2|ZFP36|TRIB1|TOB2	-0.78
GO Biological Processes	GO:1900015	regulation of cytokine production involved in inflammatory response	-3	APOD|HIF1A|PER1|BAP1|PLD3	-0.78
GO Biological Processes	GO:0060322	head development	-3	ABL1|ACTB|APOD|ZFHX3|BCR|CSF1R|ARHGAP35|GSK3B|HIF1A|ND4|PAFAH1B2|SELENOP|SKI|SRF|TGFBR2|ZFAND5|AXIN1|NAPA|RAPGEF2|FAIM2|NCOA6|CIC|SIN3A|GIT1|SMG9|ZMIZ1|CHD8	-0.77
GO Biological Processes	GO:0071560	cellular response to transforming growth factor beta stimulus	-3	ABL1|ZFP36L1|CDH5|PML|SKI|TGFBR2|ZYX|HIPK2|ZMIZ1	-0.76
GO Biological Processes	GO:0001666	response to hypoxia	-3	ZFP36L1|CREBBP|EGR1|EPAS1|HIF1A|ND4|NFE2L2|PML|PPARD|SRF|TGFBR2|HIPK2|ANGPTL4	-0.74
GO Biological Processes	GO:0071453	cellular response to oxygen levels	-3	ATP6AP1|ZFP36L1|EGR1|EPAS1|HIF1A|NFE2L2|PPARD|HIPK2|CPEB4	-0.74
GO Biological Processes	GO:0110053	regulation of actin filament organization	-2.9	ABL1|ACTG1|ARHGAP35|PRKCD|SDC4|SPTBN1|TJP1|PPFIA1|MTSS1|WDR1|TRIOBP|CLASP1|SSH2	-0.72
GO Biological Processes	GO:0010638	positive regulation of organelle organization	-2.9	ABL1|AKT2|ARHGAP35|GSK3B|HTT|HIF1A|MSN|NUMA1|PML|PPP1R10|SDC4|MTSS1|WDR1|ATG2A|CLASP1|NUP62|SIN3A|GIT1|HMBOX1	-0.72
GO Biological Processes	GO:1902459	positive regulation of stem cell population maintenance	-2.9	ACTB|ARID1A|BCL7B|SIN3A|SAP130	-0.72
GO Biological Processes	GO:0044089	positive regulation of cellular component biogenesis	-2.9	ABL1|CDH5|DAG1|ARHGAP35|GSK3B|HTT|MSN|NUMA1|SDC4|SRF|RAB7A|MTSS1|ATG2A|CLASP1|NUP62|SIN3A|GIT1|DHX33|EPS8L2	-0.7
GO Biological Processes	GO:0006417	regulation of translation	-2.9	AKT2|ZFP36L1|EEF2|EIF5A|PER1|ZFP36|PUM1|TOB1|TNRC6B|PPP1R15A|PABPC1|AGO2|SAMD4B|CPEB4|PATL1|MEX3D	-0.7
GO Biological Processes	GO:0048514	blood vessel morphogenesis	-2.9	ACTG1|APOD|ZFP36L1|DAG1|EPAS1|HIF1A|LOX|LRP1|MYH9|NOTCH2|SHB|SRF|TGFBR2|PAXIP1|ANGPTL4|ZMIZ1|ARID2	-0.69
GO Biological Processes	GO:0060249	anatomical structure homeostasis	-2.9	ACTB|ACTG1|CDH5|TPP1|EPAS1|HIF1A|LOX|MAP1A|SRF|TJP1|RAB7A|TP53INP2	-0.67
GO Biological Processes	GO:0001934	positive regulation of protein phosphorylation	-2.9	ABL1|AKT2|CDKN1A|CSF1R|DAG1|DVL3|EGR1|IL6ST|MAP3K5|NEDD9|PRKCD|SDC4|TGFBR2|AXIN1|S1PR2|TRAF4|RAPGEF2|DAZAP2|TAB2|HIPK2|WNK1|MOB3A|CCNYL1	-0.67
GO Biological Processes	GO:0045638	negative regulation of myeloid cell differentiation	-2.9	ZFP36L1|INPP5D|NFKBIA|ZFP36|TRIB1|TOB2	-0.67
GO Biological Processes	GO:2001020	regulation of response to DNA damage stimulus	-2.9	ABL1|ACTB|NPAS2|PML|PPP1R10|PRKCD|ARID1A|BCL7B|PAXIP1|POGZ|USP22|ARID1B|TADA2B|ARID2	-0.67
GO Biological Processes	GO:0043408	regulation of MAPK cascade	-2.9	ABL1|CSF1R|DAG1|DUSP1|DUSP6|DUSP8|DVL3|MAP3K5|NOTCH2|PER1|PRKCD|AXIN1|TRAF4|RAPGEF2|TNIP1|PHLPP1|NUP62|HIPK2|ERRFI1|ASH1L|DHX33|STK40	-0.67
GO Biological Processes	GO:0043618	regulation of transcription from RNA polymerase II promoter in response to stress	-2.8	EGR1|EPAS1|HIF1A|NFE2L2|SIN3A	-0.65
GO Biological Processes	GO:0048146	positive regulation of fibroblast proliferation	-2.8	ABL1|CDKN1A|FOSL2|PML|ZMIZ1	-0.65
GO Biological Processes	GO:0033044	regulation of chromosome organization	-2.8	ACTB|DUSP1|NUMA1|PML|PPP1R10|ARID1A|BCL7B|SIN3A|TRAPPC12|ARID1B|HMBOX1|ARID2	-0.65
GO Biological Processes	GO:0038066	p38MAPK cascade	-2.8	ZFP36L1|MAP3K5|ZFP36	-0.65
GO Biological Processes	GO:0061418	regulation of transcription from RNA polymerase II promoter in response to hypoxia	-2.8	EGR1|HIF1A|NFE2L2	-0.65
GO Biological Processes	GO:0034249	negative regulation of cellular amide metabolic process	-2.8	ZFP36L1|ZFP36|PUM1|TOB1|TNRC6B|AGO2|SAMD4B|CPEB4|PATL1|MEX3D	-0.65
GO Biological Processes	GO:2000112	regulation of cellular macromolecule biosynthetic process	-2.8	AKT2|ZFP36L1|EEF2|EIF5A|GSK3B|PER1|ZFP36|PUM1|TOB1|TNRC6B|PPP1R15A|PABPC1|AGO2|SAMD4B|CPEB4|PATL1|ACER2|MEX3D	-0.65
GO Biological Processes	GO:0001952	regulation of cell-matrix adhesion	-2.8	ABL1|ACTG1|APOD|DAG1|GSK3B|SDC4|CLASP1|ACER2	-0.65
GO Biological Processes	GO:0042059	negative regulation of epidermal growth factor receptor signaling pathway	-2.8	RAB7A|MVP|NUP62|ERRFI1	-0.63
GO Biological Processes	GO:2000352	negative regulation of endothelial cell apoptotic process	-2.8	ABL1|CDH5|NFE2L2|ANGPTL4	-0.63
GO Biological Processes	GO:0051098	regulation of binding	-2.8	ABL1|ACTB|CDKN1A|GSK3B|LOX|LRP1|NFKBIA|PRKCD|SKI|RAPGEF2|CARM1|SIN3A|HIPK2|ILRUN|HMBOX1	-0.63
GO Biological Processes	GO:0051983	regulation of chromosome segregation	-2.7	ACTB|DUSP1|NUMA1|ARID1A|BCL7B|PUM1|ARID1B|ARID2	-0.62
GO Biological Processes	GO:0051347	positive regulation of transferase activity	-2.7	ABL1|CDKN1A|CSF1R|DAG1|DVL3|EGR1|MAP3K5|NEDD9|PRKCD|SDC4|TGFBR2|AXIN1|TRAF4|RAPGEF2|DAZAP2|TAB2|WNK1|HMBOX1|MOB3A|CCNYL1	-0.62
GO Biological Processes	GO:0051054	positive regulation of DNA metabolic process	-2.7	ACTB|NPAS2|PML|PPP1R10|PRKCD|ARID1A|BCL7B|PAXIP1|POGZ|BRPF3|ARID1B|HMBOX1|ARID2	-0.62
GO Biological Processes	GO:1901990	regulation of mitotic cell cycle phase transition	-2.7	ACTB|ZFP36L1|CDKN1A|FOXN3|DUSP1|PML|ARID1A|BCL7B|BRD4|SIN3A|ANKRD17|WAC|ARID1B|ARID2	-0.61
GO Biological Processes	GO:0042770	signal transduction in response to DNA damage	-2.7	ABL1|CDKN1A|FOXN3|PML|PAXIP1|HIPK2|WAC|ACER2	-0.61
GO Biological Processes	GO:2000045	regulation of G1/S transition of mitotic cell cycle	-2.7	ACTB|CDKN1A|PML|ARID1A|BCL7B|ANKRD17|WAC|ARID1B|ARID2	-0.61
GO Biological Processes	GO:0045616	regulation of keratinocyte differentiation	-2.7	ZFP36L1|NUMA1|ZFP36|ERRFI1	-0.6
GO Biological Processes	GO:0048388	endosomal lumen acidification	-2.7	ATP6V0A1|ATP6AP1|RNASEK	-0.6
GO Biological Processes	GO:0002009	morphogenesis of an epithelium	-2.7	ABL1|ACTB|ACTG1|CSF1R|DAG1|DVL3|ARHGAP35|HIF1A|MSN|NOTCH2|PML|SDC4|SKI|SRF|TGFBR2|MTSS1|WDR1	-0.6
GO Biological Processes	GO:0034332	adherens junction organization	-2.7	ACTB|CDH5|TJP1|MTSS1|HIPK1	-0.6
GO Biological Processes	GO:0010810	regulation of cell-substrate adhesion	-2.7	ABL1|ACTG1|APOD|DAG1|GSK3B|NEDD9|SDC4|TRIOBP|CLASP1|PREX1|ACER2	-0.6
GO Biological Processes	GO:0043244	regulation of protein-containing complex disassembly	-2.7	EIF5A|MAP1A|SPTBN1|WDR1|TRIOBP|CLEC16A|CLASP1|SCAF4	-0.6
GO Biological Processes	GO:1904035	regulation of epithelial cell apoptotic process	-2.7	ABL1|ZFP36L1|CDH5|NFE2L2|ZFP36|ANGPTL4	-0.59
GO Biological Processes	GO:0007420	brain development	-2.7	ABL1|ACTB|APOD|ZFHX3|BCR|CSF1R|ARHGAP35|GSK3B|HIF1A|ND4|PAFAH1B2|SELENOP|SKI|SRF|TGFBR2|NAPA|RAPGEF2|FAIM2|NCOA6|CIC|SIN3A|GIT1|SMG9|ZMIZ1|CHD8	-0.59
GO Biological Processes	GO:0036294	cellular response to decreased oxygen levels	-2.7	ZFP36L1|EGR1|EPAS1|HIF1A|NFE2L2|PPARD|HIPK2|CPEB4	-0.58
GO Biological Processes	GO:2001022	positive regulation of response to DNA damage stimulus	-2.7	ACTB|NPAS2|PRKCD|ARID1A|BCL7B|PAXIP1|POGZ|ARID1B|ARID2	-0.57
GO Biological Processes	GO:0048662	negative regulation of smooth muscle cell proliferation	-2.6	APOD|CDKN1A|PPARD|S1PR2|TRIB1	-0.57
GO Biological Processes	GO:0022407	regulation of cell-cell adhesion	-2.6	ABL1|ACTB|FLOT2|IL6ST|JAK1|PRKAR1A|PRKCD|SDC4|TGFBR2|TJP1|ARID1A|PTPN23|ZMIZ1|ARID1B|WNK1|ARID2	-0.57
GO Biological Processes	GO:0042771	intrinsic apoptotic signaling pathway in response to DNA damage by p53 class mediator	-2.6	CDKN1A|PML|HIPK2|HIPK1	-0.57
GO Biological Processes	GO:0000956	nuclear-transcribed mRNA catabolic process	-2.6	ZFP36L1|ZFP36|SMG7|PABPC1|SAMD4B|SMG9|PATL1	-0.54
GO Biological Processes	GO:0033045	regulation of sister chromatid segregation	-2.6	ACTB|DUSP1|NUMA1|ARID1A|BCL7B|ARID1B|ARID2	-0.54
GO Biological Processes	GO:0048145	regulation of fibroblast proliferation	-2.6	ABL1|CDKN1A|FOSL2|PML|SKI|ZMIZ1	-0.54
GO Biological Processes	GO:0002931	response to ischemia	-2.6	CSF1R|EGR1|MAP3K5|FAIM2|CPEB4	-0.54
GO Biological Processes	GO:0007346	regulation of mitotic cell cycle	-2.6	ABL1|ACTB|ZFP36L1|CDKN1A|FOXN3|DUSP1|PML|PPP1R10|ARID1A|BCL7B|USP22|BRD4|NUP62|SIN3A|ANKRD17|WAC|ARID1B|ARID2	-0.54
GO Biological Processes	GO:1904019	epithelial cell apoptotic process	-2.6	ABL1|MAP3K5|TGFBR2|HIPK1	-0.53
GO Biological Processes	GO:1901185	negative regulation of ERBB signaling pathway	-2.6	RAB7A|MVP|NUP62|ERRFI1	-0.53
GO Biological Processes	GO:0042176	regulation of protein catabolic process	-2.6	GSK3B|LRP1|MAP1A|MSN|NFE2L2|PML|CTSA|RAB7A|AXIN1|HUWE1|TRIB1|ARIH2|WWP1|HIPK2|WAC|TMEM259	-0.53
GO Biological Processes	GO:1903362	regulation of cellular protein catabolic process	-2.6	GSK3B|LRP1|MAP1A|MSN|NFE2L2|PML|AXIN1|TRIB1|ARIH2|HIPK2|WAC|TMEM259	-0.52
GO Biological Processes	GO:0043620	regulation of DNA-templated transcription in response to stress	-2.6	EGR1|EPAS1|HIF1A|NFE2L2|SIN3A	-0.52
GO Biological Processes	GO:0002573	myeloid leukocyte differentiation	-2.6	ATP6AP1|CSF1R|MITF|MYH9|NOTCH2|TGFBR2|GAB2	-0.52
GO Biological Processes	GO:0043009	chordate embryonic development	-2.6	ABL1|ZFP36L1|DVL3|EPAS1|ARHGAP35|HIF1A|ND4|MYH9|NOTCH2|SDC4|SKI|SRF|TGFBR2|ZFAND5|AXIN1|SIN3A|SULF2|SMG9|ZMIZ1|CHD8|ZNF358	-0.52
GO Biological Processes	GO:0006338	chromatin remodeling	-2.6	ACTB|HMGA1|ARID1A|BCL7B|SRCAP|BRD4|GATAD2A|ARID1B|CHD8|TADA2B|ARID2	-0.51
GO Biological Processes	GO:0018205	peptidyl-lysine modification	-2.5	ACTB|CREBBP|LOX|PER1|PML|SRCAP|PAXIP1|NCOA6|USP22|BRPF3|ASH1L|CAMKMT|TADA2B	-0.51
GO Biological Processes	GO:0030510	regulation of BMP signaling pathway	-2.5	ABL1|CDH5|NOTCH2|NUMA1|SKI|TOB1|HIPK2	-0.51
GO Biological Processes	GO:1903955	positive regulation of protein targeting to mitochondrion	-2.5	SREBF2|BAP1|HUWE1|ARIH2	-0.51
GO Biological Processes	GO:0045214	sarcomere organization	-2.5	ACTG1|PRKAR1A|SRF|WDR1	-0.51
GO Biological Processes	GO:0007623	circadian rhythm	-2.5	ZFHX3|EGR1|GSK3B|NPAS2|PER1|PML|HUWE1|NCOA2	-0.51
GO Biological Processes	GO:0030239	myofibril assembly	-2.5	ACTG1|MEF2A|PRKAR1A|SRF|WDR1	-0.51
GO Biological Processes	GO:0031113	regulation of microtubule polymerization	-2.5	ABL1|CDH5|NUMA1|CLASP1|GIT1	-0.51
GO Biological Processes	GO:0045682	regulation of epidermis development	-2.5	ZFP36L1|NUMA1|PPARD|ZFP36|ERRFI1	-0.51
GO Biological Processes	GO:1901987	regulation of cell cycle phase transition	-2.5	ACTB|ZFP36L1|CDKN1A|FOXN3|DUSP1|PML|PPP1R10|ARID1A|BCL7B|PAXIP1|BRD4|SIN3A|ANKRD17|WAC|ARID1B|ARID2	-0.51
GO Biological Processes	GO:0050727	regulation of inflammatory response	-2.5	BCR|CDH5|IL6ST|NFKBIA|PPARD|PRKCD|ZFP36|ZYX|BAP1|TNIP1|BRD4|GIT1|ASH1L	-0.51
GO Biological Processes	GO:1905818	regulation of chromosome separation	-2.5	ACTB|DUSP1|NUMA1|ARID1A|BCL7B|ARID1B|ARID2	-0.51
GO Biological Processes	GO:0010888	negative regulation of lipid storage	-2.5	NFKBIA|PPARD|PNPLA2	-0.51
GO Biological Processes	GO:1903729	regulation of plasma membrane organization	-2.5	MYH9|PRKCD|PLEKHM2	-0.51
GO Biological Processes	GO:0045216	cell-cell junction organization	-2.5	ACTB|ACTG1|CDH5|CSF1R|SRF|TJP1|MTSS1|WDR1|HIPK1	-0.49
GO Biological Processes	GO:0055002	striated muscle cell development	-2.5	ACTG1|MEF2A|PRKAR1A|SRF|WDR1	-0.49
GO Biological Processes	GO:0045621	positive regulation of lymphocyte differentiation	-2.5	ACTB|INPP5D|TGFBR2|ARID1A|ZMIZ1|ARID1B|ARID2	-0.49
GO Biological Processes	GO:1902532	negative regulation of intracellular signal transduction	-2.5	ABL1|DAG1|DUSP1|DUSP6|DUSP8|ARHGAP35|GSK3B|HIF1A|NFE2L2|PER1|PPP1R10|PRKCD|SEC14L1|TNIP1|PHLPP1|NUP62|ERRFI1|ASH1L	-0.49
GO Biological Processes	GO:0032388	positive regulation of intracellular transport	-2.5	AKT2|GSK3B|MSN|NUMA1|PRKCD|SREBF2|BAP1|HUWE1|ARIH2|PTPN23	-0.49
GO Biological Processes	GO:1900181	negative regulation of protein localization to nucleus	-2.5	APOD|GSK3B|SIN3A|ILRUN	-0.49
GO Biological Processes	GO:0045732	positive regulation of protein catabolic process	-2.5	GSK3B|LRP1|MSN|NFE2L2|RAB7A|AXIN1|HUWE1|TRIB1|ARIH2|WWP1|TMEM259	-0.49
GO Biological Processes	GO:0048598	embryonic morphogenesis	-2.5	ABL1|BCR|ZFP36L1|CREBBP|DUSP1|DVL3|ARHGAP35|HIF1A|NOTCH2|PRKAR1A|SDC4|SKI|SRF|TGFBR2|AXIN1|TRIOBP|HIPK2|ZNF358|HIPK1	-0.49
GO Biological Processes	GO:0048729	tissue morphogenesis	-2.5	ABL1|ACTB|ACTG1|CSF1R|DAG1|DVL3|ARHGAP35|HIF1A|MSN|NOTCH2|PML|PRKAR1A|SDC4|SKI|SRF|TGFBR2|AXIN1|MTSS1|WDR1	-0.49
GO Biological Processes	GO:0032231	regulation of actin filament bundle assembly	-2.5	ABL1|ACTG1|SDC4|TJP1|PPFIA1|MTSS1|CLASP1	-0.48
GO Biological Processes	GO:0010631	epithelial cell migration	-2.5	ABL1|CDH5|MYH9|PPARD|SRF|PAXIP1	-0.48
GO Biological Processes	GO:0072331	signal transduction by p53 class mediator	-2.5	CDKN1A|PML|PAXIP1|HIPK2|HIPK1|ACER2	-0.48
GO Biological Processes	GO:2000058	regulation of ubiquitin-dependent protein catabolic process	-2.5	GSK3B|MAP1A|NFE2L2|PML|AXIN1|TRIB1|ARIH2|HIPK2|WAC	-0.48
GO Biological Processes	GO:0035633	maintenance of blood-brain barrier	-2.4	ACTB|ACTG1|CDH5|TJP1	-0.47
GO Biological Processes	GO:2000249	regulation of actin cytoskeleton reorganization	-2.4	ABL1|CSF1R|NOTCH2|TJP1	-0.47
GO Biological Processes	GO:0008631	intrinsic apoptotic signaling pathway in response to oxidative stress	-2.4	MAP3K5|PML|PRKCD	-0.47
GO Biological Processes	GO:0030220	platelet formation	-2.4	MYH9|SRF|WDR1	-0.47
GO Biological Processes	GO:0045217	cell-cell junction maintenance	-2.4	CSF1R|TJP1|MTSS1	-0.47
GO Biological Processes	GO:0039535	regulation of RIG-I signaling pathway	-2.4	SEC14L1|PUM1|ANKRD17	-0.47
GO Biological Processes	GO:0006337	nucleosome disassembly	-2.4	HMGA1|ARID1A|ARID2	-0.47
GO Biological Processes	GO:0036344	platelet morphogenesis	-2.4	MYH9|SRF|WDR1	-0.47
GO Biological Processes	GO:0046716	muscle cell cellular homeostasis	-2.4	HIF1A|LOX|SRF	-0.47
GO Biological Processes	GO:0090132	epithelium migration	-2.4	ABL1|CDH5|MYH9|PPARD|SRF|PAXIP1	-0.47
GO Biological Processes	GO:0002521	leukocyte differentiation	-2.4	ABL1|ATP6AP1|ZFP36L1|CSF1R|EGR1|MITF|MYH9|NOTCH2|SRF|TGFBR2|GAB2|LRRC8A|PREX1	-0.47
GO Biological Processes	GO:0045619	regulation of lymphocyte differentiation	-2.4	ABL1|ACTB|ZFP36L1|INPP5D|TGFBR2|ARID1A|ZMIZ1|ARID1B|ARID2	-0.46
GO Biological Processes	GO:0031348	negative regulation of defense response	-2.4	BCR|SERPING1|CDH5|PPARD|PRKCD|SEC14L1|ZFP36|GIT1|ASH1L|ILRUN	-0.46
GO Biological Processes	GO:0017015	regulation of transforming growth factor beta receptor signaling pathway	-2.4	CREBBP|LOX|SKI|AXIN1|SIN3A|HIPK2|SAP130|BCL9L	-0.45
GO Biological Processes	GO:0007605	sensory perception of sound	-2.4	TBL1X|AXIN1|WDR1|TRIOBP|USP53|EPS8L2|MYH14|FBXO11	-0.45
GO Biological Processes	GO:2000781	positive regulation of double-strand break repair	-2.4	ACTB|ARID1A|BCL7B|POGZ|ARID1B|ARID2	-0.45
GO Biological Processes	GO:0045765	regulation of angiogenesis	-2.4	ABL1|CDH5|HIF1A|JAK1|NFE2L2|PML|TGFBR2|TJP1|AGO2|HIPK2|ANGPTL4|HIPK1	-0.45
GO Biological Processes	GO:0007178	transmembrane receptor protein serine/threonine kinase signaling pathway	-2.4	CDH5|EGR1|PML|SKI|SPTBN1|TGFBR2|ZYX|HIPK2|ZMIZ1	-0.45
GO Biological Processes	GO:0032102	negative regulation of response to external stimulus	-2.4	BCR|SERPING1|CDH5|DUSP1|PPARD|PRKCD|SEC14L1|ZFP36|TRIB1|CLASP1|GIT1|ASH1L|CHD8|ILRUN	-0.45
GO Biological Processes	GO:1903749	positive regulation of establishment of protein localization to mitochondrion	-2.4	SREBF2|BAP1|HUWE1|ARIH2	-0.44
GO Biological Processes	GO:1902893	regulation of miRNA transcription	-2.4	EGR1|HIF1A|PPARD|SREBF2|SRF	-0.44
GO Biological Processes	GO:0043254	regulation of protein-containing complex assembly	-2.4	ABL1|CDH5|GSK3B|MSN|NUMA1|PRKCD|SPTBN1|NAPA|TRIOBP|CLASP1|GIT1|TRAPPC12|DHX33|SSH2|STX1B	-0.44
GO Biological Processes	GO:0007043	cell-cell junction assembly	-2.4	ACTB|ACTG1|CDH5|SRF|TJP1|WDR1|HIPK1	-0.44
GO Biological Processes	GO:0090100	positive regulation of transmembrane receptor protein serine/threonine kinase signaling pathway	-2.4	CDH5|CREBBP|NOTCH2|NUMA1|TGFBR2|AXIN1|HIPK2	-0.44
GO Biological Processes	GO:1903844	regulation of cellular response to transforming growth factor beta stimulus	-2.4	CREBBP|LOX|SKI|AXIN1|SIN3A|HIPK2|SAP130|BCL9L	-0.43
GO Biological Processes	GO:0060562	epithelial tube morphogenesis	-2.4	ABL1|CSF1R|DAG1|DVL3|ARHGAP35|HIF1A|NOTCH2|PML|SDC4|SKI|SRF|TGFBR2|MTSS1	-0.43
GO Biological Processes	GO:0032691	negative regulation of interleukin-1 beta production	-2.3	PML|GIT1|ERRFI1	-0.43
GO Biological Processes	GO:0016575	histone deacetylation	-2.3	PER1|TBL1X|SIN3A|GATAD2A|MIDEAS	-0.42
GO Biological Processes	GO:0051052	regulation of DNA metabolic process	-2.3	ACTB|CDKN1A|NPAS2|PML|PPP1R10|PRKCD|ARID1A|BCL7B|PAXIP1|POGZ|USP22|ANKRD17|BRPF3|ARID1B|HMBOX1|TADA2B|ARID2|ZBTB38	-0.42
GO Biological Processes	GO:1901342	regulation of vasculature development	-2.3	ABL1|CDH5|HIF1A|JAK1|NFE2L2|PML|TGFBR2|TJP1|AGO2|HIPK2|ANGPTL4|HIPK1	-0.42
GO Biological Processes	GO:0046849	bone remodeling	-2.3	TPP1|MITF|NOTCH2|RAB7A	-0.42
GO Biological Processes	GO:0022604	regulation of cell morphogenesis	-2.3	ABL1|CSF1R|DAG1|DVL3|ARHGAP35|MSN|MYH9|NEDD9|WDR1|TRIOBP|PREX1|MYH14|BCL9L	-0.42
GO Biological Processes	GO:0001667	ameboidal-type cell migration	-2.3	ABL1|CDH5|HIF1A|MYH9|PML|PPARD|SRF|ZFAND5|PAXIP1	-0.41
GO Biological Processes	GO:1902806	regulation of cell cycle G1/S phase transition	-2.3	ACTB|CDKN1A|PML|ARID1A|BCL7B|ANKRD17|WAC|ARID1B|ARID2	-0.41
GO Biological Processes	GO:0090101	negative regulation of transmembrane receptor protein serine/threonine kinase signaling pathway	-2.3	ABL1|LRP1|SKI|TOB1|SIN3A|HIPK2|SAP130|BCL9L	-0.41
GO Biological Processes	GO:0006282	regulation of DNA repair	-2.3	ACTB|NPAS2|PML|ARID1A|BCL7B|POGZ|USP22|ARID1B|TADA2B|ARID2	-0.41
GO Biological Processes	GO:0031110	regulation of microtubule polymerization or depolymerization	-2.3	ABL1|CDH5|MAP1A|NUMA1|CLASP1|GIT1	-0.41
GO Biological Processes	GO:0071216	cellular response to biotic stimulus	-2.3	ABL1|BCR|GSK3B|NFKBIA|NOTCH2|PPARD|ZFP36|TNIP1|GIT1	-0.4
GO Biological Processes	GO:0097193	intrinsic apoptotic signaling pathway	-2.3	ABL1|CDKN1A|MAP3K5|PML|PRKCD|PPP1R15A|HIPK2|HIPK1	-0.4
GO Biological Processes	GO:0048771	tissue remodeling	-2.3	TPP1|EPAS1|HIF1A|MITF|NOTCH2|RAB7A	-0.39
GO Biological Processes	GO:0035304	regulation of protein dephosphorylation	-2.3	CDH5|GSK3B|HTT|PPP2R5D|PRKCD|PPP1R15A	-0.39
GO Biological Processes	GO:2000479	regulation of cAMP-dependent protein kinase activity	-2.3	HTT|PRKAR1A|RAPGEF2	-0.39
GO Biological Processes	GO:0071498	cellular response to fluid shear stress	-2.3	NFE2L2|SREBF2|MTSS1	-0.39
GO Biological Processes	GO:0032986	protein-DNA complex disassembly	-2.3	HMGA1|ARID1A|ARID2	-0.39
GO Biological Processes	GO:0043542	endothelial cell migration	-2.3	ABL1|CDH5|MYH9|SRF|PAXIP1	-0.39
GO Biological Processes	GO:0030879	mammary gland development	-2.3	AKT2|CSF1R|ARHGAP35|HIF1A|PML|TGFBR2|NCOR2	-0.39
GO Biological Processes	GO:0030071	regulation of mitotic metaphase/anaphase transition	-2.3	ACTB|DUSP1|ARID1A|BCL7B|ARID1B|ARID2	-0.38
GO Biological Processes	GO:0090130	tissue migration	-2.3	ABL1|CDH5|MYH9|PPARD|SRF|PAXIP1	-0.38
GO Biological Processes	GO:0022409	positive regulation of cell-cell adhesion	-2.2	ACTB|FLOT2|IL6ST|JAK1|TGFBR2|TJP1|ARID1A|PTPN23|ZMIZ1|ARID1B|ARID2	-0.37
GO Biological Processes	GO:0031330	negative regulation of cellular catabolic process	-2.2	FOXK2|MAP1A|PML|CTSA|ZFP36|TOB1|TAB2|CLEC16A|PABPC1|HIPK2|WAC	-0.37
GO Biological Processes	GO:0006476	protein deacetylation	-2.2	PER1|TBL1X|SIN3A|GATAD2A|MIDEAS	-0.37
GO Biological Processes	GO:0030316	osteoclast differentiation	-2.2	ATP6AP1|CSF1R|MITF|GAB2	-0.37
GO Biological Processes	GO:0034250	positive regulation of cellular amide metabolic process	-2.2	EEF2|EIF5A|NFE2L2|PRKCD|TOB1|PPP1R15A|PABPC1|AGO2	-0.37
GO Biological Processes	GO:0071456	cellular response to hypoxia	-2.2	ZFP36L1|EGR1|EPAS1|HIF1A|NFE2L2|PPARD|HIPK2	-0.36
GO Biological Processes	GO:0002694	regulation of leukocyte activation	-2.2	ABL1|ACTB|BCR|ZFP36L1|CDKN1A|FLOT2|IL6ST|INPP5D|PRKAR1A|SDC4|TGFBR2|ARID1A|GAB2|PAXIP1|ZMIZ1|ARID1B|ARID2	-0.35
GO Biological Processes	GO:1905952	regulation of lipid localization	-2.2	AKT2|LRP1|NFKBIA|ABCB4|PPARD|PRKCD|SREBF2|PNPLA2	-0.35
GO Biological Processes	GO:0014910	regulation of smooth muscle cell migration	-2.2	LRP1|NFE2L2|PPARD|S1PR2|TRIB1	-0.35
GO Biological Processes	GO:0039531	regulation of viral-induced cytoplasmic pattern recognition receptor signaling pathway	-2.2	SEC14L1|PUM1|ANKRD17	-0.35
GO Biological Processes	GO:0002089	lens morphogenesis in camera-type eye	-2.2	SKI|HIPK2|HIPK1	-0.35
GO Biological Processes	GO:1902099	regulation of metaphase/anaphase transition of cell cycle	-2.2	ACTB|DUSP1|ARID1A|BCL7B|ARID1B|ARID2	-0.35
GO Biological Processes	GO:0001678	cellular glucose homeostasis	-2.2	HIF1A|FOXK2|SRF|ZNF236|SIN3A|LRRC8A	-0.35
GO Biological Processes	GO:1900026	positive regulation of substrate adhesion-dependent cell spreading	-2.2	ABL1|NEDD9|TRIOBP|PREX1	-0.35
GO Biological Processes	GO:1900744	regulation of p38MAPK cascade	-2.2	DUSP1|MAP3K5|PER1|PHLPP1	-0.35
GO Biological Processes	GO:0043114	regulation of vascular permeability	-2.2	BCR|CDH5|ARHGAP35|TJP1	-0.35
GO Biological Processes	GO:1903311	regulation of mRNA metabolic process	-2.2	ZFP36L1|PRKCD|ZFP36|PUM1|TOB1|MBNL2|TNRC6B|PABPC1|AGO2|SAMD4B|PATL1|MEX3D	-0.35
GO Biological Processes	GO:0006913	nucleocytoplasmic transport	-2.2	CDKN1A|NFKBIA|PML|PPP1R10|AXIN1|SMG7|XPO6|NUP62|THOC3|POM121C	-0.35
GO Biological Processes	GO:0051169	nuclear transport	-2.2	CDKN1A|NFKBIA|PML|PPP1R10|AXIN1|SMG7|XPO6|NUP62|THOC3|POM121C	-0.35
GO Biological Processes	GO:0006402	mRNA catabolic process	-2.2	ZFP36L1|ZFP36|SMG7|PABPC1|SAMD4B|SMG9|PATL1	-0.35
GO Biological Processes	GO:0010811	positive regulation of cell-substrate adhesion	-2.2	ABL1|DAG1|GSK3B|NEDD9|SDC4|TRIOBP|PREX1	-0.35
GO Biological Processes	GO:0016573	histone acetylation	-2.2	ACTB|CREBBP|PER1|SRCAP|USP22|BRPF3|TADA2B	-0.35
GO Biological Processes	GO:0010965	regulation of mitotic sister chromatid separation	-2.2	ACTB|DUSP1|ARID1A|BCL7B|ARID1B|ARID2	-0.35
GO Biological Processes	GO:0051492	regulation of stress fiber assembly	-2.2	ABL1|ACTG1|SDC4|TJP1|PPFIA1|CLASP1	-0.35
GO Biological Processes	GO:0045582	positive regulation of T cell differentiation	-2.2	ACTB|TGFBR2|ARID1A|ZMIZ1|ARID1B|ARID2	-0.35
GO Biological Processes	GO:0051249	regulation of lymphocyte activation	-2.2	ABL1|ACTB|ZFP36L1|CDKN1A|FLOT2|IL6ST|INPP5D|PRKAR1A|SDC4|TGFBR2|ARID1A|PAXIP1|ZMIZ1|ARID1B|ARID2	-0.35
GO Biological Processes	GO:0043122	regulation of I-kappaB kinase/NF-kappaB signaling	-2.2	ABL1|PER1|TRAF4|TNIP1|TAB2|BRD4|NUP62|ANKRD17|CC2D1A|ASH1L	-0.34
GO Biological Processes	GO:0045739	positive regulation of DNA repair	-2.2	ACTB|NPAS2|ARID1A|BCL7B|POGZ|ARID1B|ARID2	-0.34
GO Biological Processes	GO:0071345	cellular response to cytokine stimulus	-2.2	ACTG1|ZFP36L1|CSF1R|DUSP1|EGR1|EIF5A|GSK3B|HIF1A|IL6ST|IL13RA1|JAK1|LOX|MAP3K5|NFE2L2|NFKBIA|PML|ZFP36|ZYX|WNK1	-0.34
GO Biological Processes	GO:0043124	negative regulation of I-kappaB kinase/NF-kappaB signaling	-2.2	ABL1|PER1|TNIP1|ASH1L	-0.34
GO Biological Processes	GO:0050865	regulation of cell activation	-2.2	ABL1|ACTB|BCR|ZFP36L1|CDKN1A|FLOT2|IL6ST|INPP5D|PRKAR1A|PRKCD|SDC4|TGFBR2|ARID1A|GAB2|PAXIP1|ZMIZ1|ARID1B|ARID2	-0.33
GO Biological Processes	GO:0007568	aging	-2.1	APOD|SERPING1|DAG1|ND4|NFE2L2|TGFBR2|CARM1|SIN3A	-0.33
GO Biological Processes	GO:1903050	regulation of proteolysis involved in cellular protein catabolic process	-2.1	GSK3B|MAP1A|NFE2L2|PML|AXIN1|TRIB1|ARIH2|HIPK2|WAC|TMEM259	-0.33
GO Biological Processes	GO:0006606	protein import into nucleus	-2.1	CDKN1A|NFKBIA|PML|PPP1R10|NUP62|POM121C	-0.32
GO Biological Processes	GO:1902904	negative regulation of supramolecular fiber organization	-2.1	CDH5|PRKCD|SPTBN1|TJP1|PPFIA1|TRIOBP|CLASP1|SSH2	-0.32
GO Biological Processes	GO:0051494	negative regulation of cytoskeleton organization	-2.1	CDH5|PRKCD|SPTBN1|TJP1|PPFIA1|TRIOBP|CLASP1|SSH2	-0.32
GO Biological Processes	GO:0021915	neural tube development	-2.1	ABL1|ZFP36L1|DVL3|ARHGAP35|HIF1A|SDC4|SKI|ZNF358	-0.32
GO Biological Processes	GO:0008630	intrinsic apoptotic signaling pathway in response to DNA damage	-2.1	ABL1|CDKN1A|PML|HIPK2|HIPK1	-0.32
GO Biological Processes	GO:2000351	regulation of endothelial cell apoptotic process	-2.1	ABL1|CDH5|NFE2L2|ANGPTL4	-0.32
GO Biological Processes	GO:0016441	post-transcriptional gene silencing	-2.1	ZFP36|PUM1|TNRC6B|AGO2	-0.32
GO Biological Processes	GO:0006120	mitochondrial electron transport, NADH to ubiquinone	-2.1	ND1|ND2|ND4|ND6	-0.32
GO Biological Processes	GO:0060425	lung morphogenesis	-2.1	DAG1|SRF|TGFBR2|STK40	-0.32
GO Biological Processes	GO:0019725	cellular homeostasis	-2.1	ATP6V0A1|ATP6AP1|CDH5|HIF1A|FOXK2|LOX|MAP1A|NFE2L2|PML|SRF|ZNF236|RAB7A|CHERP|SIN3A|GIT1|LRRC8A|ATP13A1|SLC41A1|RNASEK	-0.31
GO Biological Processes	GO:0022612	gland morphogenesis	-2.1	CSF1R|DAG1|MSN|NOTCH2|PML|TGFBR2	-0.31
GO Biological Processes	GO:0070507	regulation of microtubule cytoskeleton organization	-2.1	ABL1|CDH5|GSK3B|MAP1A|NUMA1|CLASP1|NUP62|GIT1	-0.31
GO Biological Processes	GO:1903364	positive regulation of cellular protein catabolic process	-2.1	GSK3B|LRP1|MSN|NFE2L2|AXIN1|TRIB1|ARIH2|TMEM259	-0.31
GO Biological Processes	GO:0032984	protein-containing complex disassembly	-2.1	GSK3B|HMGA1|SH3GL1|ARID1A|NAPA|WDR1|ARID2	-0.31
GO Biological Processes	GO:0018393	internal peptidyl-lysine acetylation	-2.1	ACTB|CREBBP|PER1|SRCAP|USP22|BRPF3|TADA2B	-0.31
GO Biological Processes	GO:0035303	regulation of dephosphorylation	-2.1	CDH5|GSK3B|HTT|PPP2R5D|PRKCD|SMG7|PPP1R15A	-0.31
GO Biological Processes	GO:0048732	gland development	-2.1	ABL1|AKT2|CSF1R|DAG1|ARHGAP35|HIF1A|MSN|NOTCH2|PHF2|PML|SRF|TGFBR2|NCOR2|ASH1L	-0.31
GO Biological Processes	GO:0051348	negative regulation of transferase activity	-2.1	ABL1|CDKN1A|DUSP1|GSK3B|PRKAR1A|PRKCD|ZFP36|MVP|TRIB1|NUP62|ERRFI1	-0.31
GO Biological Processes	GO:0140694	non-membrane-bounded organelle assembly	-2.1	ACTG1|MEF2A|NUMA1|PRKAR1A|SRF|UBAP2L|WDR1|POGZ|CLASP1|NUP62|TUBB|PATL1	-0.31
GO Biological Processes	GO:2000036	regulation of stem cell population maintenance	-2.1	ACTB|ARID1A|BCL7B|SIN3A|SAP130	-0.31
GO Biological Processes	GO:0001701	in utero embryonic development	-2.1	ZFP36L1|EPAS1|HIF1A|ND4|MYH9|NOTCH2|SRF|TGFBR2|ZFAND5|AXIN1|SIN3A|SMG9|ZMIZ1|CHD8	-0.31
GO Biological Processes	GO:0032271	regulation of protein polymerization	-2.1	ABL1|CDH5|NUMA1|PRKCD|SPTBN1|TRIOBP|CLASP1|GIT1|SSH2	-0.31
GO Biological Processes	GO:0043393	regulation of protein binding	-2.1	ABL1|ACTB|CDKN1A|GSK3B|LOX|LRP1|PRKCD|RAPGEF2|HIPK2	-0.31
GO Biological Processes	GO:0014020	primary neural tube formation	-2.1	ABL1|DVL3|ARHGAP35|HIF1A|SDC4|SKI	-0.31
GO Biological Processes	GO:0035195	miRNA-mediated gene silencing	-2.1	ZFP36|TNRC6B|AGO2	-0.31
GO Biological Processes	GO:1904263	positive regulation of TORC1 signaling	-2.1	CLEC16A|SIK3|WAC	-0.31
GO Biological Processes	GO:0010640	regulation of platelet-derived growth factor receptor signaling pathway	-2.1	APOD|LOX|LRP1	-0.31
GO Biological Processes	GO:0036473	cell death in response to oxidative stress	-2.1	MAP3K5|PML|PRKCD	-0.31
GO Biological Processes	GO:0007042	lysosomal lumen acidification	-2.1	ATP6V0A1|ATP6AP1|RNASEK	-0.31
GO Biological Processes	GO:0006475	internal protein amino acid acetylation	-2.1	ACTB|CREBBP|PER1|SRCAP|USP22|BRPF3|TADA2B	-0.31
GO Biological Processes	GO:0034331	cell junction maintenance	-2.1	CSF1R|TJP1|MTSS1|ERC1	-0.31
GO Biological Processes	GO:0035307	positive regulation of protein dephosphorylation	-2.1	CDH5|PPP2R5D|PRKCD|PPP1R15A	-0.31
GO Biological Processes	GO:0045646	regulation of erythrocyte differentiation	-2.1	ZFP36L1|HIF1A|INPP5D|ZFP36	-0.31
GO Biological Processes	GO:0048511	rhythmic process	-2.1	ZFHX3|CREBBP|EGR1|GSK3B|NPAS2|PER1|PML|NCOR2|HUWE1|NCOA2|SIN3A	-0.31
GO Biological Processes	GO:2000779	regulation of double-strand break repair	-2.1	ACTB|PML|ARID1A|BCL7B|POGZ|ARID1B|ARID2	-0.3
GO Biological Processes	GO:0110020	regulation of actomyosin structure organization	-2.1	ABL1|ACTG1|SDC4|TJP1|PPFIA1|CLASP1	-0.3
GO Biological Processes	GO:0005976	polysaccharide metabolic process	-2.1	AKT2|GSK3B|IL6ST|CHST7|STK40	-0.3
GO Biological Processes	GO:0002696	positive regulation of leukocyte activation	-2	ACTB|CDKN1A|FLOT2|IL6ST|INPP5D|TGFBR2|ARID1A|GAB2|PAXIP1|ZMIZ1|ARID1B|ARID2	-0.29
GO Biological Processes	GO:0050905	neuromuscular process	-2	ABL1|BCR|TPP1|MAP1A|HIPK2|CHD8|MYH14	-0.29
GO Biological Processes	GO:0018394	peptidyl-lysine acetylation	-2	ACTB|CREBBP|PER1|SRCAP|USP22|BRPF3|TADA2B	-0.29
GO Biological Processes	GO:1903214	regulation of protein targeting to mitochondrion	-2	SREBF2|BAP1|HUWE1|ARIH2	-0.29
GO Biological Processes	GO:0010883	regulation of lipid storage	-2	NFKBIA|PPARD|SREBF2|PNPLA2	-0.29
GO Biological Processes	GO:1902895	positive regulation of miRNA transcription	-2	EGR1|HIF1A|SREBF2|SRF	-0.29
GO Biological Processes	GO:1904036	negative regulation of epithelial cell apoptotic process	-2	ABL1|CDH5|NFE2L2|ANGPTL4	-0.29
GO Biological Processes	GO:0000288	nuclear-transcribed mRNA catabolic process, deadenylation-dependent decay	-2	ZFP36L1|ZFP36|SAMD4B|PATL1	-0.29
GO Biological Processes	GO:0002761	regulation of myeloid leukocyte differentiation	-2	ZFP36L1|INPP5D|MITF|NOTCH2|TRIB1|TOB2	-0.29
GO Biological Processes	GO:0051170	import into nucleus	-2	CDKN1A|NFKBIA|PML|PPP1R10|NUP62|POM121C	-0.29
GO Biological Processes	GO:0051251	positive regulation of lymphocyte activation	-2	ACTB|CDKN1A|FLOT2|IL6ST|INPP5D|TGFBR2|ARID1A|PAXIP1|ZMIZ1|ARID1B|ARID2	-0.29
GO Biological Processes	GO:0090109	regulation of cell-substrate junction assembly	-2	ABL1|ACTG1|APOD|SDC4|CLASP1	-0.29
GO Biological Processes	GO:0051893	regulation of focal adhesion assembly	-2	ABL1|ACTG1|APOD|SDC4|CLASP1	-0.29
GO Biological Processes	GO:0045724	positive regulation of cilium assembly	-2	ARHGAP35|GSK3B|HTT	-0.29
GO Biological Processes	GO:0032692	negative regulation of interleukin-1 production	-2	PML|GIT1|ERRFI1	-0.29
GO Biological Processes	GO:0031571	mitotic G1 DNA damage checkpoint signaling	-2	CDKN1A|PML|WAC	-0.29
GO Biological Processes	GO:0050954	sensory perception of mechanical stimulus	-2	TBL1X|AXIN1|WDR1|TRIOBP|USP53|EPS8L2|MYH14|FBXO11	-0.28
GO Biological Processes	GO:0007163	establishment or maintenance of cell polarity	-2	ACTB|ARHGAP35|GSK3B|HTT|MSN|MYH9|NUMA1|WDR1|CLASP1	-0.27
GO Biological Processes	GO:0032147	activation of protein kinase activity	-2	ABL1|PRKCD|TGFBR2|AXIN1|TRAF4|WNK1|MOB3A	-0.27
GO Biological Processes	GO:0050728	negative regulation of inflammatory response	-2	BCR|CDH5|PPARD|PRKCD|ZFP36|GIT1|ASH1L	-0.27
GO Biological Processes	GO:0032272	negative regulation of protein polymerization	-2	CDH5|PRKCD|SPTBN1|TRIOBP|SSH2	-0.27
GO Cellular Components	GO:0005667	transcription regulator complex	-5.5	ZFHX3|CREBBP|EPAS1|FOSL2|HIF1A|HMGA1|MEF2A|MXI1|NFE2L2|NPAS2|SKI|MED22|TBL1X|NCOR2|NCOA2|NCOA6|USP22|SIN3A|HIPK2|GATAD2A|AKIRIN2|PHF12|MIDEAS|BCL9L	-2.2
GO Cellular Components	GO:0000118	histone deacetylase complex	-3.9	TBL1X|SRCAP|SIN3A|KDM3B|GATAD2A|PHF12|SAP130|MIDEAS	-1.3
GO Cellular Components	GO:0016514	SWI/SNF complex	-3.8	ACTB|ARID1A|BCL7B|ARID1B|ARID2	-1.3
GO Cellular Components	GO:0036464	cytoplasmic ribonucleoprotein granule	-3.7	ACTB|ZFP36L1|SHB|ZFP36|PUM1|UBAP2L|TNRC6B|PABPC1|AGO2|SAMD4B|ZNFX1|TUBB|PATL1	-1.2
GO Cellular Components	GO:0035770	ribonucleoprotein granule	-3.4	ACTB|ZFP36L1|SHB|ZFP36|PUM1|UBAP2L|TNRC6B|PABPC1|AGO2|SAMD4B|ZNFX1|TUBB|PATL1	-0.98
GO Cellular Components	GO:0005911	cell-cell junction	-3.3	ACTB|ACTG1|CDH5|DAG1|FLOT2|MSN|MYH9|ABCB4|PRKCD|TJP1|ZYX|TRAF4|RAPGEF2|WDR1|SPECC1L|CTNNA3|UBN1|USP53|ASH1L|CADM3	-0.93
GO Cellular Components	GO:0016605	PML body	-3.2	PML|SKI|HIPK2|UBN1|TP53INP2|HMBOX1|HIPK1|PATL1	-0.89
GO Cellular Components	GO:0140092	bBAF complex	-3.2	ACTB|ARID1A|ARID1B	-0.89
GO Cellular Components	GO:0000932	P-body	-3.1	ZFP36L1|ZFP36|PUM1|TNRC6B|AGO2|SAMD4B|PATL1	-0.8
GO Cellular Components	GO:0030863	cortical cytoskeleton	-3	ACTB|FLOT2|MYH9|NUMA1|SPTBN1|WDR1|ERC1|CLASP1	-0.76
GO Cellular Components	GO:0043296	apical junction complex	-3	ACTB|ACTG1|CDH5|TJP1|TRAF4|RAPGEF2|UBN1|USP53|ASH1L	-0.76
GO Cellular Components	GO:0005925	focal adhesion	-2.9	ACTB|ACTG1|DAG1|FLOT2|HMGA1|JAK1|LRP1|MSN|MYH9|NEDD9|ABCB4|SDC4|ZYX|PPFIA1|TRIOBP|CLASP1|PABPC1|GIT1	-0.72
GO Cellular Components	GO:0001931	uropod	-2.9	FLOT2|MSN|MYH9	-0.72
GO Cellular Components	GO:0031254	cell trailing edge	-2.9	FLOT2|MSN|MYH9	-0.72
GO Cellular Components	GO:0070603	SWI/SNF superfamily-type complex	-2.9	ACTB|ARID1A|BCL7B|SRCAP|GATAD2A|ARID1B|ARID2	-0.68
GO Cellular Components	GO:0043202	lysosomal lumen	-2.8	TPP1|MAN2B1|CTSA|SDC4|SDC3|PLD3|PLBD2	-0.65
GO Cellular Components	GO:0030055	cell-substrate junction	-2.8	ACTB|ACTG1|DAG1|FLOT2|HMGA1|JAK1|LRP1|MSN|MYH9|NEDD9|ABCB4|SDC4|ZYX|PPFIA1|TRIOBP|CLASP1|PABPC1|GIT1	-0.65
GO Cellular Components	GO:0035060	brahma complex	-2.8	ACTB|ARID1A|ARID1B	-0.65
GO Cellular Components	GO:0071564	npBAF complex	-2.8	ACTB|ARID1A|ARID1B	-0.65
GO Cellular Components	GO:0070160	tight junction	-2.8	ACTB|CDH5|TJP1|TRAF4|RAPGEF2|UBN1|USP53|ASH1L	-0.65
GO Cellular Components	GO:1904949	ATPase complex	-2.8	ACTB|ARID1A|BCL7B|SRCAP|GATAD2A|ARID1B|ARID2	-0.63
GO Cellular Components	GO:0071565	nBAF complex	-2.6	ACTB|ARID1A|ARID1B	-0.54
GO Cellular Components	GO:0005775	vacuolar lumen	-2.6	TPP1|MAN2B1|CTSA|PRKCD|SDC4|SDC3|PLD3|PLBD2|TUBB	-0.53
GO Cellular Components	GO:0017053	transcription repressor complex	-2.5	SKI|TBL1X|NCOR2|SIN3A|AKIRIN2|PHF12	-0.51
GO Cellular Components	GO:0015629	actin cytoskeleton	-2.5	ABL1|ACTB|ACTG1|FLOT2|ARHGAP35|MYH9|ABCB4|SH3GL1|SPTBN1|TJP1|ZYX|MTSS1|WDR1|TRIOBP|SPECC1L|TMEM63B|MYH14|DYNLL2	-0.51
GO Cellular Components	GO:0090575	RNA polymerase II transcription regulator complex	-2.5	FOSL2|HIF1A|HMGA1|MXI1|NFE2L2|NPAS2|MED22|NCOA2|USP22|HIPK2|BCL9L	-0.48
GO Cellular Components	GO:0034399	nuclear periphery	-2.3	ACTB|DAG1|NUMA1|PML|PRKCD|NCOR2|PAXIP1|ARID2	-0.4
GO Cellular Components	GO:0005923	bicellular tight junction	-2.3	CDH5|TJP1|TRAF4|RAPGEF2|UBN1|USP53|ASH1L	-0.4
GO Cellular Components	GO:0044305	calyx of Held	-2.3	ACTB|ACTG1|GIT1	-0.39
GO Cellular Components	GO:0005912	adherens junction	-2.2	ACTB|CDH5|DAG1|FLOT2|MSN|MYH9|TJP1|ZYX|CTNNA3	-0.34
GO Cellular Components	GO:0070822	Sin3-type complex	-2.1	SIN3A|PHF12|SAP130	-0.33
GO Cellular Components	GO:0016580	Sin3 complex	-2.1	SIN3A|PHF12|SAP130	-0.33
GO Cellular Components	GO:0016363	nuclear matrix	-2.1	ACTB|NUMA1|PML|PRKCD|NCOR2|PAXIP1|ARID2	-0.31
GO Molecular Functions	GO:0019901	protein kinase binding	-8.1	ABL1|ACTB|AP2A1|CDH5|CDKN1A|DUSP1|EEF2|GSK3B|HIF1A|MEF2A|MAP3K5|MSN|ND2|NEDD9|PRKAR1A|PRKCD|SDC4|SKI|TGFBR2|ZFP36|AXIN1|TRAF4|DAZAP2|GAB2|MVP|TOB1|TRIB1|TNIP1|PPP1R15A|PTPN23|PPME1|ERRFI1|WNK1|STX1B|CCNYL1	-4
GO Molecular Functions	GO:0019900	kinase binding	-7.8	ABL1|ACTB|AP2A1|CDH5|CDKN1A|DUSP1|EEF2|GSK3B|HTT|HIF1A|MEF2A|MAP3K5|MSN|ND2|NEDD9|PER1|PRKAR1A|PRKCD|SDC4|SKI|TGFBR2|ZFP36|AXIN1|TRAF4|DAZAP2|GAB2|MVP|TOB1|TRIB1|TNIP1|PPP1R15A|PTPN23|PPME1|ERRFI1|WNK1|STX1B|CCNYL1	-3.9
GO Molecular Functions	GO:0003712	transcription coregulator activity	-7.1	ABL1|CREBBP|HMGA1|PHF2|MED22|TBL1X|ARID1A|NCOR2|TOB1|CARM1|NCOA2|TOB2|SRCAP|NCOA6|USP22|MED13L|BRD4|SIN3A|HIPK2|KDM3B|AKIRIN2|ZMIZ1|ARID1B|PHF12|MIDEAS|TADA2B|ZXDB|BCL9L	-3.4
GO Molecular Functions	GO:0140297	DNA-binding transcription factor binding	-6.1	ACTB|CREBBP|EPAS1|GSK3B|HIF1A|HMGA1|MEF2A|NFIA|NFE2L2|NFKBIA|NOTCH2|PER1|PPARD|SKI|SRF|TBL1X|ARID1A|NCOR2|TRIB1|NCOA2|TOB2|NCOA6|SIN3A|HIPK2|DHX33	-2.6
GO Molecular Functions	GO:0061629	RNA polymerase II-specific DNA-binding transcription factor binding	-5.4	ACTB|CREBBP|EPAS1|GSK3B|HIF1A|HMGA1|MEF2A|NFE2L2|NFKBIA|NOTCH2|PPARD|SRF|ARID1A|NCOR2|TRIB1|NCOA2|TOB2|NCOA6|SIN3A|HIPK2	-2.2
GO Molecular Functions	GO:0003682	chromatin binding	-5.2	ACTB|CREBBP|EGR1|FOSL2|HMGA1|MEF2A|MITF|NFIA|PER1|SRF|ARID1A|BAP1|NCOR2|NCOA2|NCOA6|BRD4|NUP62|SIN3A|ANKRD17|WAC|KDM3B|ASH1L|ARID1B|CHD8|TNRC18|TADA2B	-2
GO Molecular Functions	GO:0003713	transcription coactivator activity	-5.1	ABL1|CREBBP|HMGA1|PHF2|ARID1A|CARM1|NCOA2|SRCAP|NCOA6|USP22|BRD4|SIN3A|HIPK2|ZMIZ1|ARID1B|TADA2B|BCL9L	-2
GO Molecular Functions	GO:0008134	transcription factor binding	-4.7	ACTB|CREBBP|EPAS1|GSK3B|HIF1A|HMGA1|MEF2A|NFIA|NFE2L2|NFKBIA|NOTCH2|PER1|PPARD|SKI|SRF|TBL1X|ARID1A|NCOR2|TRIB1|NCOA2|TOB2|NCOA6|SIN3A|HIPK2|DHX33|PHF12	-1.7
GO Molecular Functions	GO:0008013	beta-catenin binding	-4.4	CDH5|DVL3|GSK3B|TBL1X|AXIN1|CARM1|CTNNA3|CHD8|BCL9L	-1.6
GO Molecular Functions	GO:0046332	SMAD binding	-4	MEF2A|PML|SKI|TGFBR2|AXIN1|TOB1|HIPK2|ZMIZ1	-1.3
GO Molecular Functions	GO:0002039	p53 binding	-3.8	CREBBP|GSK3B|HTT|HIF1A|AXIN1|BRD4|CHD8	-1.2
GO Molecular Functions	GO:0031625	ubiquitin protein ligase binding	-3.5	ACTG1|CDKN1A|GSK3B|HIF1A|JAK1|NFKBIA|PER1|PML|PRKAR1A|SKI|AXIN1|TRAF4|TRIB1|TRIOBP|TUBB	-1.1
GO Molecular Functions	GO:0044389	ubiquitin-like protein ligase binding	-3.3	ACTG1|CDKN1A|GSK3B|HIF1A|JAK1|NFKBIA|PER1|PML|PRKAR1A|SKI|AXIN1|TRAF4|TRIB1|TRIOBP|TUBB	-0.95
GO Molecular Functions	GO:0030374	nuclear receptor coactivator activity	-3.2	HMGA1|CARM1|NCOA2|NCOA6|USP22|ZMIZ1	-0.89
GO Molecular Functions	GO:0001221	transcription coregulator binding	-3.1	CREBBP|EPAS1|HIF1A|HMGA1|NFE2L2|PER1|PPARD|PHF12	-0.8
GO Molecular Functions	GO:0008330	protein tyrosine/threonine phosphatase activity	-3.1	DUSP1|DUSP6|DUSP8	-0.79
GO Molecular Functions	GO:0019904	protein domain specific binding	-3	ABL1|ARHGAP1|DAG1|HIF1A|INPP5D|MAP3K5|MYH9|NFE2L2|NUMA1|PRKAR1A|SKI|TBL1X|AXIN1|TRAF4|RAPGEF2|DAZAP2|ELMO1|NCOA2|ERC1|NUP62|NCKIPSD|ERRFI1|CHD8|TUBB	-0.77
GO Molecular Functions	GO:0017017	MAP kinase tyrosine/serine/threonine phosphatase activity	-2.8	DUSP1|DUSP6|DUSP8	-0.65
GO Molecular Functions	GO:0019903	protein phosphatase binding	-2.8	CDH5|CSF1R|JAK1|MAP3K5|PPP1R10|SMG7|MVP|PPP1R15A|PPME1	-0.63
GO Molecular Functions	GO:0046965	nuclear retinoid X receptor binding	-2.6	HMGA1|NCOR2|NCOA6	-0.54
GO Molecular Functions	GO:0051059	NF-kappaB binding	-2.6	GSK3B|NFKBIA|NOTCH2|PPARD	-0.53
GO Molecular Functions	GO:0033549	MAP kinase phosphatase activity	-2.5	DUSP1|DUSP6|DUSP8	-0.51
GO Molecular Functions	GO:0019902	phosphatase binding	-2.5	CDH5|CSF1R|JAK1|MAP3K5|PPP1R10|SMG7|MVP|PPP1R15A|PPME1|WNK1	-0.49
GO Molecular Functions	GO:0003727	single-stranded RNA binding	-2.4	SNRPC|PABPC1|AGO2|ZFR|MSI2|PATL1	-0.47
GO Molecular Functions	GO:0098918	structural constituent of synapse	-2.3	ACTB|ACTG1|ERC1	-0.43
GO Molecular Functions	GO:0003730	mRNA 3'-UTR binding	-2.3	ZFP36L1|ZFP36|PUM1|PABPC1|CPEB4|MEX3D	-0.41
GO Molecular Functions	GO:0070063	RNA polymerase binding	-2.3	ZFP36|BRD4|AGO2|WAC|SCAF4	-0.41
GO Molecular Functions	GO:0000993	RNA polymerase II complex binding	-2.3	BRD4|AGO2|WAC|SCAF4	-0.39
GO Molecular Functions	GO:0008022	protein C-terminus binding	-2.3	ABL1|FOXN3|NUMA1|SREBF2|TBL1X|AXIN1|PABPC1|AGO2|SCAF4	-0.37
GO Molecular Functions	GO:0008137	NADH dehydrogenase (ubiquinone) activity	-2.2	ND1|ND2|ND4|ND6	-0.37
GO Molecular Functions	GO:0008047	enzyme activator activity	-2.2	ARHGAP1|BCR|CDKN1A|ARHGAP35|CTSA|PPP2R5D|PRKCD|RAPGEF2|DAZAP2|TBC1D9|PPP1R15A|GIT1|ERRFI1|PREX1|SMAP2|WNK1|MOB3A|CCNYL1	-0.35
GO Molecular Functions	GO:0003729	mRNA binding	-2.2	ZFP36L1|SNRPC|ZFP36|PUM1|PTBP3|CLUH|PABPC1|AGO2|SAMD4B|DHX33|CPEB4|MEX3D	-0.35
GO Molecular Functions	GO:0050136	NADH dehydrogenase (quinone) activity	-2.2	ND1|ND2|ND4|ND6	-0.35
GO Molecular Functions	GO:0001223	transcription coactivator binding	-2.2	CREBBP|EPAS1|HIF1A|PPARD	-0.34
GO Molecular Functions	GO:0008138	protein tyrosine/serine/threonine phosphatase activity	-2.2	DUSP1|DUSP6|DUSP8|SSH2	-0.34
GO Molecular Functions	GO:0070888	E-box binding	-2.2	HIF1A|MITF|PER1|SREBF2	-0.34
GO Molecular Functions	GO:0003714	transcription corepressor activity	-2.1	CREBBP|TBL1X|NCOR2|TOB1|TOB2|SIN3A|HIPK2|PHF12|MIDEAS	-0.32
GO Molecular Functions	GO:0003954	NADH dehydrogenase activity	-2.1	ND1|ND2|ND4|ND6	-0.32
GO Molecular Functions	GO:0043175	RNA polymerase core enzyme binding	-2.1	BRD4|AGO2|WAC|SCAF4	-0.32
GO Molecular Functions	GO:0003955	NAD(P)H dehydrogenase (quinone) activity	-2.1	ND1|ND2|ND4|ND6	-0.31
GO Molecular Functions	GO:0004860	protein kinase inhibitor activity	-2	CDKN1A|PRKAR1A|TRIB1|WNK1|ITPRIP	-0.29
GO Molecular Functions	GO:0008266	poly(U) RNA binding	-2	PABPC1|MSI2|PATL1	-0.29
GO Molecular Functions	GO:0042974	nuclear retinoic acid receptor binding	-2	HMGA1|NCOR2|NCOA6	-0.29
KEGG Pathway	hsa05200	Pathways in cancer	-4.9	ABL1|AKT2|BCR|CDKN1A|CREBBP|CSF1R|DVL3|EPAS1|GSK3B|HIF1A|IL6ST|IL13RA1|JAK1|MITF|NFE2L2|NFKBIA|NOTCH2|PML|PPARD|RALGDS|TGFBR2|AXIN1|TRAF4|CTNNA3	-2.3
KEGG Pathway	hsa05225	Hepatocellular carcinoma	-4.4	ACTB|ACTG1|AKT2|CDKN1A|DVL3|GSK3B|NFE2L2|TGFBR2|ARID1A|AXIN1|ARID1B|ARID2	-2.2
KEGG Pathway	hsa04919	Thyroid hormone signaling pathway	-3.9	ACTB|ACTG1|AKT2|CREBBP|GSK3B|HIF1A|NOTCH2|NCOA2|MED13L|SIN3A	-1.9
KEGG Pathway	hsa04380	Osteoclast differentiation	-3.6	AKT2|CSF1R|FOSL2|JAK1|MITF|NFKBIA|TGFBR2|GAB2|TAB2	-1.7
KEGG Pathway	hsa05418	Fluid shear stress and atherosclerosis	-3.2	ACTB|ACTG1|AKT2|CDH5|DUSP1|MEF2A|MAP3K5|NFE2L2|SDC4	-1.5
KEGG Pathway	hsa05220	Chronic myeloid leukemia	-3.2	ABL1|AKT2|BCR|CDKN1A|NFKBIA|TGFBR2|GAB2	-1.5
KEGG Pathway	hsa05167	Kaposi sarcoma-associated herpesvirus infection	-3.2	AKT2|CDKN1A|CREBBP|GSK3B|HIF1A|IL6ST|JAK1|NFKBIA|ZFP36|PREX1	-1.5
KEGG Pathway	hsa05208	Chemical carcinogenesis - reactive oxygen species	-2.8	ABL1|AKT2|HIF1A|MAP3K5|ND1|ND2|ND4|ND6|NFE2L2|NFKBIA|PRKCD	-1.1
KEGG Pathway	hsa05110	Vibrio cholerae infection	-2.7	ACTB|ACTG1|ATP6V0A1|ATP6AP1|TJP1	-1.1
KEGG Pathway	hsa04520	Adherens junction	-2.5	ACTB|ACTG1|CREBBP|TGFBR2|TJP1|CTNNA3	-1.1
KEGG Pathway	hsa05132	Salmonella infection	-2.5	ACTB|ACTG1|AKT2|KIF5C|NFKBIA|RAB7A|ELMO1|TAB2|PLEKHM2|DYNLL2|TUBB	-1.1
KEGG Pathway	hsa04714	Thermogenesis	-2.5	ACTB|ACTG1|MAP3K5|ND1|ND2|ND4|ND6|ARID1A|KDM3B|PNPLA2|ARID1B	-1.1
KEGG Pathway	hsa05130	Pathogenic Escherichia coli infection	-2.4	ABL1|ACTB|ACTG1|MYH9|NFKBIA|TJP1|TAB2|MYH14|TUBB	-0.96
KEGG Pathway	hsa05213	Endometrial cancer	-2.3	AKT2|CDKN1A|GSK3B|AXIN1|CTNNA3	-0.94
KEGG Pathway	hsa05161	Hepatitis B	-2.3	AKT2|ATP6AP1|CDKN1A|CREBBP|JAK1|NFKBIA|TGFBR2|TAB2	-0.9
KEGG Pathway	hsa05221	Acute myeloid leukemia	-2.2	AKT2|CSF1R|DUSP6|PML|PPARD	-0.9
KEGG Pathway	hsa05210	Colorectal cancer	-2.2	AKT2|CDKN1A|GSK3B|RALGDS|TGFBR2|AXIN1	-0.9
KEGG Pathway	hsa04530	Tight junction	-2.2	ACTB|ACTG1|MAP3K5|MSN|MYH9|TJP1|RAPGEF2|MYH14	-0.9
KEGG Pathway	hsa05016	Huntington disease	-2.2	AP2A1|CREBBP|HTT|KIF5C|MAP3K5|ND1|ND2|ND4|ND6|ATG2A|SIN3A|TUBB	-0.9
KEGG Pathway	hsa05164	Influenza A	-2.1	ACTB|ACTG1|AKT2|CREBBP|JAK1|NFKBIA|PML	-0.87
KEGG Pathway	hsa05120	Epithelial cell signaling in Helicobacter pylori infection	-2.1	ATP6V0A1|ATP6AP1|NFKBIA|TJP1|GIT1	-0.87
KEGG Pathway	hsa05416	Viral myocarditis	-2.1	ABL1|ACTB|ACTG1|DAG1	-0.87
KEGG Pathway	hsa05211	Renal cell carcinoma	-2	AKT2|CDKN1A|CREBBP|EPAS1|HIF1A	-0.86
KEGG Pathway	hsa04550	Signaling pathways regulating pluripotency of stem cells	-2	AKT2|ZFHX3|DVL3|GSK3B|IL6ST|JAK1|AXIN1	-0.86
KEGG Pathway	hsa04670	Leukocyte transendothelial migration	-2	ACTB|ACTG1|CDH5|ARHGAP35|MSN|CTNNA3	-0.86

## Sheet: female-biased-gene_share_443
Category	GO	Description	LogP	Hits	Log(q-value)
GO Biological Processes	GO:0006119	oxidative phosphorylation	-30	ATP5F1A|ATP5F1E|ATP5ME|ATP5PO|COX6B1|COX6C|COX7A1|COX7A2P2|COX7B|COX15|COX3|NDUFA1|NDUFA2|NDUFA3|NDUFA7|NDUFA8|NDUFA9|NDUFB4|NDUFB5|NDUFB8|NDUFC2|NDUFS4|NDUFS5|SDHD|UQCRH|COX7A2L|COX5A|ATP5MF|ATP5PD|ATP5MG|UQCRQ|UQCR10|NDUFA13|CYCS|NDUFB11|NDUFA12|TEFM|COA6	-26
GO Biological Processes	GO:0006412	translation	-27	NDUFA7|RPL7|RPL9|RPL10|RPL11|RPL17|RPL18|RPL23A|MRPL23|RPL24|RPL27|RPL30|RPL27A|RPL29|RPL31|RPL32|RPL34|RPL35A|RPL37|RPL37A|RPL38|RPL39|RPS3|RPS8|RPS12|RPS13|RPS17|RPS19|RPS20|RPS21|RPS23|RPS24|RPS27|RPS27A|RPS28|RPS29|RPL23|MRPL33|MRPL19|COPS5|MRPL3|HARS2|MRPL42|MRPL13|MRPL18|MRPS18C|MRPL2|MRPL51|MRPS23|RARS2|MRPS14|MRPL14|MRPL36|MRPL11|MRPL9|MRPL43|MRPL52|RPL22L1	-24
GO Biological Processes	GO:0006518	peptide metabolic process	-27	GSTA4|GSTM3|NDUFA7|RPL7|RPL9|RPL10|RPL11|RPL17|RPL18|RPL23A|MRPL23|RPL24|RPL27|RPL30|RPL27A|RPL29|RPL31|RPL32|RPL34|RPL35A|RPL37|RPL37A|RPL38|RPL39|RPS3|RPS8|RPS12|RPS13|RPS17|RPS19|RPS20|RPS21|RPS23|RPS24|RPS27|RPS27A|RPS28|RPS29|RPL23|GSTO1|MRPL33|ECE2|SPCS2|MRPL19|ABCA7|CPQ|COPS5|MRPL3|HARS2|MRPL42|MRPL13|MRPL18|GLRX2|MRPS18C|MRPL2|MRPL51|MRPS23|BDH2|RARS2|MRPS14|MRPL14|MRPL36|MRPL11|MRPL9|MRP…	-24
GO Biological Processes	GO:0043043	peptide biosynthetic process	-27	NDUFA7|RPL7|RPL9|RPL10|RPL11|RPL17|RPL18|RPL23A|MRPL23|RPL24|RPL27|RPL30|RPL27A|RPL29|RPL31|RPL32|RPL34|RPL35A|RPL37|RPL37A|RPL38|RPL39|RPS3|RPS8|RPS12|RPS13|RPS17|RPS19|RPS20|RPS21|RPS23|RPS24|RPS27|RPS27A|RPS28|RPS29|RPL23|MRPL33|MRPL19|COPS5|MRPL3|HARS2|MRPL42|MRPL13|MRPL18|MRPS18C|MRPL2|MRPL51|MRPS23|BDH2|RARS2|MRPS14|MRPL14|MRPL36|MRPL11|MRPL9|MRPL43|MRPL52|RPL22L1	-24
GO Biological Processes	GO:0046034	ATP metabolic process	-26	NUDT2|ATP5F1A|ATP5F1E|ATP5MC1|ATP5MC3|ATP5ME|ATP5PO|COX6B1|COX6C|COX7A1|COX7A2P2|COX7B|COX15|COX3|NDUFA1|NDUFA2|NDUFA3|NDUFA7|NDUFA8|NDUFA9|NDUFB4|NDUFB5|NDUFB8|NDUFC2|NDUFS4|NDUFS5|SDHD|UQCRH|COX7A2L|COX5A|ATP5MF|ATP5PD|ATP5MG|NUDT5|UQCRQ|UQCR10|NDUFA13|CYCS|NDUFB11|NDUFA12|FIGNL1|TEFM|ATP5MK|COA6	-23
GO Biological Processes	GO:0002181	cytoplasmic translation	-26	RPL7|RPL9|RPL10|RPL11|RPL17|RPL18|RPL23A|RPL24|RPL27|RPL30|RPL27A|RPL29|RPL31|RPL32|RPL34|RPL35A|RPL37|RPL37A|RPL38|RPL39|RPS3|RPS8|RPS12|RPS13|RPS17|RPS19|RPS20|RPS21|RPS23|RPS24|RPS27|RPS27A|RPS28|RPS29|RPL23|RPL22L1	-23
GO Biological Processes	GO:0009060	aerobic respiration	-24	ATP5F1A|ATP5F1E|ATP5ME|ATP5PO|COX6B1|COX6C|COX7A1|COX7A2P2|COX7B|COX15|COX3|NDUFA1|NDUFA2|NDUFA3|NDUFA7|NDUFA8|NDUFA9|NDUFB4|NDUFB5|NDUFB8|NDUFC2|NDUFS4|NDUFS5|SDHD|UQCRH|COX7A2L|COX5A|ATP5MF|ATP5PD|ATP5MG|UQCRQ|UQCR10|NDUFA13|CYCS|NDUFB11|NDUFA12|TEFM|COA6	-21
GO Biological Processes	GO:0045333	cellular respiration	-22	ATP5F1A|ATP5F1E|ATP5ME|ATP5PO|COX6B1|COX6C|COX7A1|COX7A2P2|COX7B|COX15|ETFA|COX3|NDUFA1|NDUFA2|NDUFA3|NDUFA7|NDUFA8|NDUFA9|NDUFB4|NDUFB5|NDUFB8|NDUFC2|NDUFS4|NDUFS5|SDHD|UQCRH|COX7A2L|COX5A|ATP5MF|ATP5PD|ATP5MG|UQCRQ|UQCR10|NDUFA13|CYCS|NDUFB11|NDUFA12|TEFM|COA6	-19
GO Biological Processes	GO:0015986	proton motive force-driven ATP synthesis	-22	ATP5F1A|ATP5F1E|ATP5MC1|ATP5MC3|ATP5ME|ATP5PO|NDUFA1|NDUFA2|NDUFA3|NDUFA7|NDUFA8|NDUFA9|NDUFB4|NDUFB5|NDUFB8|NDUFC2|NDUFS4|NDUFS5|SDHD|ATP5MF|ATP5PD|ATP5MG|NDUFA13|NDUFB11|NDUFA12|ATP5MK	-19
GO Biological Processes	GO:0042775	mitochondrial ATP synthesis coupled electron transport	-21	COX6B1|COX6C|COX7A1|COX7A2P2|COX7B|COX15|COX3|NDUFA1|NDUFA2|NDUFA3|NDUFA7|NDUFA8|NDUFA9|NDUFB4|NDUFB5|NDUFB8|NDUFC2|NDUFS4|NDUFS5|SDHD|UQCRH|COX7A2L|COX5A|UQCRQ|UQCR10|CYCS|NDUFA12|COA6	-19
GO Biological Processes	GO:0042773	ATP synthesis coupled electron transport	-21	COX6B1|COX6C|COX7A1|COX7A2P2|COX7B|COX15|COX3|NDUFA1|NDUFA2|NDUFA3|NDUFA7|NDUFA8|NDUFA9|NDUFB4|NDUFB5|NDUFB8|NDUFC2|NDUFS4|NDUFS5|SDHD|UQCRH|COX7A2L|COX5A|UQCRQ|UQCR10|CYCS|NDUFA12|COA6	-19
GO Biological Processes	GO:0006754	ATP biosynthetic process	-21	NUDT2|ATP5F1A|ATP5F1E|ATP5MC1|ATP5MC3|ATP5ME|ATP5PO|NDUFA1|NDUFA2|NDUFA3|NDUFA7|NDUFA8|NDUFA9|NDUFB4|NDUFB5|NDUFB8|NDUFC2|NDUFS4|NDUFS5|SDHD|ATP5MF|ATP5PD|ATP5MG|NDUFA13|NDUFB11|NDUFA12|ATP5MK	-18
GO Biological Processes	GO:0043604	amide biosynthetic process	-21	NDUFA7|RPL7|RPL9|RPL10|RPL11|RPL17|RPL18|RPL23A|MRPL23|RPL24|RPL27|RPL30|RPL27A|RPL29|RPL31|RPL32|RPL34|RPL35A|RPL37|RPL37A|RPL38|RPL39|RPS3|RPS8|RPS12|RPS13|RPS17|RPS19|RPS20|RPS21|RPS23|RPS24|RPS27|RPS27A|RPS28|RPS29|RPL23|MRPL33|MRPL19|COPS5|MRPL3|HARS2|MRPL42|MRPL13|MRPL18|MRPS18C|MRPL2|MRPL51|MRPS23|BDH2|RARS2|MRPS14|MRPL14|MRPL36|MRPL11|MRPL9|MRPL43|MRPL52|SPTSSA|RPL22L1	-18
GO Biological Processes	GO:0009206	purine ribonucleoside triphosphate biosynthetic process	-21	NUDT2|ATP5F1A|ATP5F1E|ATP5MC1|ATP5MC3|ATP5ME|ATP5PO|NDUFA1|NDUFA2|NDUFA3|NDUFA7|NDUFA8|NDUFA9|NDUFB4|NDUFB5|NDUFB8|NDUFC2|NDUFS4|NDUFS5|SDHD|ATP5MF|ATP5PD|ATP5MG|NME7|NDUFA13|NDUFB11|NDUFA12|ATP5MK	-18
GO Biological Processes	GO:0009145	purine nucleoside triphosphate biosynthetic process	-21	NUDT2|ATP5F1A|ATP5F1E|ATP5MC1|ATP5MC3|ATP5ME|ATP5PO|NDUFA1|NDUFA2|NDUFA3|NDUFA7|NDUFA8|NDUFA9|NDUFB4|NDUFB5|NDUFB8|NDUFC2|NDUFS4|NDUFS5|SDHD|ATP5MF|ATP5PD|ATP5MG|NME7|NDUFA13|NDUFB11|NDUFA12|ATP5MK	-18
GO Biological Processes	GO:0009201	ribonucleoside triphosphate biosynthetic process	-20	NUDT2|ATP5F1A|ATP5F1E|ATP5MC1|ATP5MC3|ATP5ME|ATP5PO|NDUFA1|NDUFA2|NDUFA3|NDUFA7|NDUFA8|NDUFA9|NDUFB4|NDUFB5|NDUFB8|NDUFC2|NDUFS4|NDUFS5|SDHD|ATP5MF|ATP5PD|ATP5MG|NME7|NDUFA13|NDUFB11|NDUFA12|ATP5MK	-17
GO Biological Processes	GO:0009205	purine ribonucleoside triphosphate metabolic process	-20	NUDT2|ATP5F1A|ATP5F1E|ATP5MC1|ATP5MC3|ATP5ME|ATP5PO|ITPA|NDUFA1|NDUFA2|NDUFA3|NDUFA7|NDUFA8|NDUFA9|NDUFB4|NDUFB5|NDUFB8|NDUFC2|NDUFS4|NDUFS5|SDHD|ATP5MF|ATP5PD|ATP5MG|NME7|NDUFA13|NDUFB11|NDUFA12|ATP5MK	-17
GO Biological Processes	GO:0007005	mitochondrion organization	-20	COX7A1|COX7A2P2|HSPD1|NDUFA1|NDUFA2|NDUFA3|NDUFA8|NDUFA9|NDUFB4|NDUFB5|NDUFB8|NDUFC2|NDUFS4|NDUFS5|SSBP1|VDAC2|OGT|COX7A2L|ATG5|COX17|TIMM17A|MTX2|GABARAPL2|HTRA2|NDUFA13|COX16|NDUFB11|TOMM7|TMEM70|NDUFA12|NDUFAF5|MAIP1|MAP1LC3B|SLIRP|TMEM126A|UQCC2|MGARP|COX14|DMAC1|ATP23|NDUFAF2|ATP5IF1|MICOS13|CIBAR1|FMC1|IMMP1L|BLOC1S2|MTX3|SMIM20|MICOS10|COA5|C12orf73|PET100	-17
GO Biological Processes	GO:0019646	aerobic electron transport chain	-20	COX6B1|COX6C|COX7A1|COX7A2P2|COX7B|COX15|COX3|NDUFA1|NDUFA2|NDUFA3|NDUFA7|NDUFA8|NDUFA9|NDUFB4|NDUFB5|NDUFB8|NDUFC2|NDUFS4|NDUFS5|SDHD|UQCRH|COX7A2L|COX5A|UQCRQ|UQCR10|CYCS	-17
GO Biological Processes	GO:0022900	electron transport chain	-20	ADH5|ALDH2|COX6B1|COX6C|COX7A1|COX7A2P2|COX7B|COX15|ETFA|FDX1|COX3|NDUFA1|NDUFA2|NDUFA3|NDUFA7|NDUFA8|NDUFA9|NDUFB4|NDUFB5|NDUFB8|NDUFC2|NDUFS4|NDUFS5|SDHD|UQCRH|COX7A2L|COX5A|UQCRQ|UQCR10|GLRX2|CYCS|NDUFA12|FDX2|COA6	-17
GO Biological Processes	GO:0022904	respiratory electron transport chain	-20	COX6B1|COX6C|COX7A1|COX7A2P2|COX7B|COX15|ETFA|COX3|NDUFA1|NDUFA2|NDUFA3|NDUFA7|NDUFA8|NDUFA9|NDUFB4|NDUFB5|NDUFB8|NDUFC2|NDUFS4|NDUFS5|SDHD|UQCRH|COX7A2L|COX5A|UQCRQ|UQCR10|CYCS|NDUFA12|COA6	-17
GO Biological Processes	GO:0009144	purine nucleoside triphosphate metabolic process	-19	NUDT2|ATP5F1A|ATP5F1E|ATP5MC1|ATP5MC3|ATP5ME|ATP5PO|ITPA|NDUFA1|NDUFA2|NDUFA3|NDUFA7|NDUFA8|NDUFA9|NDUFB4|NDUFB5|NDUFB8|NDUFC2|NDUFS4|NDUFS5|SDHD|ATP5MF|ATP5PD|ATP5MG|NME7|NDUFA13|NDUFB11|NDUFA12|ATP5MK	-17
GO Biological Processes	GO:0042776	proton motive force-driven mitochondrial ATP synthesis	-19	ATP5F1A|ATP5F1E|ATP5ME|ATP5PO|NDUFA1|NDUFA2|NDUFA3|NDUFA7|NDUFA8|NDUFA9|NDUFB4|NDUFB5|NDUFB8|NDUFC2|NDUFS4|NDUFS5|SDHD|ATP5MF|ATP5PD|ATP5MG|NDUFA13|NDUFB11|NDUFA12	-17
GO Biological Processes	GO:0043603	cellular amide metabolic process	-19	GSTA4|GSTM3|NDUFA7|RPL7|RPL9|RPL10|RPL11|RPL17|RPL18|RPL23A|MRPL23|RPL24|RPL27|RPL30|RPL27A|RPL29|RPL31|RPL32|RPL34|RPL35A|RPL37|RPL37A|RPL38|RPL39|RPS3|RPS8|RPS12|RPS13|RPS17|RPS19|RPS20|RPS21|RPS23|RPS24|RPS27|RPS27A|RPS28|RPS29|RPL23|GSTO1|MRPL33|ECE2|SPCS2|MRPL19|ABCA7|CPQ|COPS5|MRPL3|HARS2|HTRA2|MRPL42|MRPL13|MRPL18|GLRX2|MRPS18C|MRPL2|MRPL51|MRPS23|NAGK|BDH2|RARS2|MRPS14|MRPL14|MRPL36|MRPL1…	-17
GO Biological Processes	GO:0009199	ribonucleoside triphosphate metabolic process	-19	NUDT2|ATP5F1A|ATP5F1E|ATP5MC1|ATP5MC3|ATP5ME|ATP5PO|ITPA|NDUFA1|NDUFA2|NDUFA3|NDUFA7|NDUFA8|NDUFA9|NDUFB4|NDUFB5|NDUFB8|NDUFC2|NDUFS4|NDUFS5|SDHD|ATP5MF|ATP5PD|ATP5MG|NME7|NDUFA13|NDUFB11|NDUFA12|ATP5MK	-16
GO Biological Processes	GO:0033108	mitochondrial respiratory chain complex assembly	-19	NDUFA1|NDUFA2|NDUFA3|NDUFA8|NDUFA9|NDUFB4|NDUFB5|NDUFB8|NDUFC2|NDUFS4|NDUFS5|COX17|NDUFA13|COX16|NDUFB11|NDUFA12|NDUFAF5|TMEM126A|UQCC2|COX14|DMAC1|NDUFAF2|SMIM20|COA5|C12orf73|PET100	-16
GO Biological Processes	GO:0009142	nucleoside triphosphate biosynthetic process	-18	NUDT2|ATP5F1A|ATP5F1E|ATP5MC1|ATP5MC3|ATP5ME|ATP5PO|NDUFA1|NDUFA2|NDUFA3|NDUFA7|NDUFA8|NDUFA9|NDUFB4|NDUFB5|NDUFB8|NDUFC2|NDUFS4|NDUFS5|SDHD|ATP5MF|ATP5PD|ATP5MG|NME7|NDUFA13|NDUFB11|NDUFA12|ATP5MK	-16
GO Biological Processes	GO:0015980	energy derivation by oxidation of organic compounds	-18	ATP5F1A|ATP5F1E|ATP5ME|ATP5PO|COX6B1|COX6C|COX7A1|COX7A2P2|COX7B|COX15|ETFA|COX3|NDUFA1|NDUFA2|NDUFA3|NDUFA7|NDUFA8|NDUFA9|NDUFB4|NDUFB5|NDUFB8|NDUFC2|NDUFS4|NDUFS5|SDHD|UGP2|UQCRH|COX7A2L|COX5A|ATP5MF|ATP5PD|ATP5MG|UQCRQ|UQCR10|NDUFA13|CYCS|NDUFB11|NDUFA12|TEFM|COA6	-16
GO Biological Processes	GO:0009141	nucleoside triphosphate metabolic process	-17	NUDT2|ATP5F1A|ATP5F1E|ATP5MC1|ATP5MC3|ATP5ME|ATP5PO|ITPA|NDUFA1|NDUFA2|NDUFA3|NDUFA7|NDUFA8|NDUFA9|NDUFB4|NDUFB5|NDUFB8|NDUFC2|NDUFS4|NDUFS5|SDHD|ATP5MF|ATP5PD|ATP5MG|NME7|NDUFA13|NDUFB11|NDUFA12|ATP5MK	-14
GO Biological Processes	GO:0006091	generation of precursor metabolites and energy	-17	ADH5|ALDH2|ATP5F1A|ATP5F1E|ATP5ME|ATP5PO|COX6B1|COX6C|COX7A1|COX7A2P2|COX7B|COX15|ETFA|FDX1|COX3|NDUFA1|NDUFA2|NDUFA3|NDUFA7|NDUFA8|NDUFA9|NDUFB4|NDUFB5|NDUFB8|NDUFC2|NDUFS4|NDUFS5|SDHD|UGP2|UQCRH|COX7A2L|COX5A|ATP5MF|COX17|ATP5PD|ATP5MG|UQCRQ|UQCR10|GLRX2|NDUFA13|CYCS|NDUFB11|NDUFA12|TEFM|ATP5IF1|FDX2|COA6	-14
GO Biological Processes	GO:0034645	cellular macromolecule biosynthetic process	-15	NDUFA7|RPL7|RPL9|RPL10|RPL11|RPL17|RPL18|RPL23A|MRPL23|RPL24|RPL27|RPL30|RPL27A|RPL29|RPL31|RPL32|RPL34|RPL35A|RPL37|RPL37A|RPL38|RPL39|RPS3|RPS8|RPS12|RPS13|RPS17|RPS19|RPS20|RPS21|RPS23|RPS24|RPS27|RPS27A|RPS28|RPS29|UGP2|OGT|B3GALNT1|RPL23|ATG5|MRPL33|MRPL19|COPS5|MRPL3|HARS2|MRPL42|MRPL13|MRPL18|MRPS18C|MRPL2|MRPL51|MRPS23|RARS2|MRPS14|MRPL14|MRPL36|MRPL11|MRPL9|MRPL43|MRPL52|KRTCAP2|RPL22L1	-12
GO Biological Processes	GO:0009152	purine ribonucleotide biosynthetic process	-14	NUDT2|ATP5F1A|ATP5F1E|ATP5MC1|ATP5MC3|ATP5ME|ATP5PO|NDUFA1|NDUFA2|NDUFA3|NDUFA7|NDUFA8|NDUFA9|NDUFB4|NDUFB5|NDUFB8|NDUFC2|NDUFS4|NDUFS5|SDHD|ATP5MF|ATP5PD|ATP5MG|NME7|SLC35B3|NDUFA13|NDUFB11|NDUFA12|PPCDC|ATP5MK	-11
GO Biological Processes	GO:0010257	NADH dehydrogenase complex assembly	-14	NDUFA1|NDUFA2|NDUFA3|NDUFA8|NDUFA9|NDUFB4|NDUFB5|NDUFB8|NDUFC2|NDUFS4|NDUFS5|NDUFA13|NDUFB11|NDUFA12|NDUFAF5|TMEM126A|DMAC1|NDUFAF2	-11
GO Biological Processes	GO:0032981	mitochondrial respiratory chain complex I assembly	-14	NDUFA1|NDUFA2|NDUFA3|NDUFA8|NDUFA9|NDUFB4|NDUFB5|NDUFB8|NDUFC2|NDUFS4|NDUFS5|NDUFA13|NDUFB11|NDUFA12|NDUFAF5|TMEM126A|DMAC1|NDUFAF2	-11
GO Biological Processes	GO:0009260	ribonucleotide biosynthetic process	-14	NUDT2|ATP5F1A|ATP5F1E|ATP5MC1|ATP5MC3|ATP5ME|ATP5PO|NDUFA1|NDUFA2|NDUFA3|NDUFA7|NDUFA8|NDUFA9|NDUFB4|NDUFB5|NDUFB8|NDUFC2|NDUFS4|NDUFS5|SDHD|ATP5MF|ATP5PD|ATP5MG|NME7|SLC35B3|NDUFA13|NDUFB11|NDUFA12|PPCDC|ATP5MK|UPRT	-11
GO Biological Processes	GO:0046390	ribose phosphate biosynthetic process	-13	NUDT2|ATP5F1A|ATP5F1E|ATP5MC1|ATP5MC3|ATP5ME|ATP5PO|NDUFA1|NDUFA2|NDUFA3|NDUFA7|NDUFA8|NDUFA9|NDUFB4|NDUFB5|NDUFB8|NDUFC2|NDUFS4|NDUFS5|SDHD|ATP5MF|ATP5PD|ATP5MG|NME7|SLC35B3|NDUFA13|NDUFB11|NDUFA12|PPCDC|ATP5MK|UPRT	-11
GO Biological Processes	GO:0006164	purine nucleotide biosynthetic process	-13	NUDT2|ATP5F1A|ATP5F1E|ATP5MC1|ATP5MC3|ATP5ME|ATP5PO|NDUFA1|NDUFA2|NDUFA3|NDUFA7|NDUFA8|NDUFA9|NDUFB4|NDUFB5|NDUFB8|NDUFC2|NDUFS4|NDUFS5|SDHD|ATP5MF|ATP5PD|ATP5MG|NME7|SLC35B3|NDUFA13|NDUFB11|NDUFA12|PPCDC|ATP5MK	-11
GO Biological Processes	GO:0072522	purine-containing compound biosynthetic process	-13	NUDT2|ATP5F1A|ATP5F1E|ATP5MC1|ATP5MC3|ATP5ME|ATP5PO|NDUFA1|NDUFA2|NDUFA3|NDUFA7|NDUFA8|NDUFA9|NDUFB4|NDUFB5|NDUFB8|NDUFC2|NDUFS4|NDUFS5|SDHD|ATP5MF|ATP5PD|ATP5MG|NME7|SLC35B3|NDUFA13|NDUFB11|NDUFA12|PPCDC|ATP5MK	-10
GO Biological Processes	GO:0009165	nucleotide biosynthetic process	-11	NUDT2|ATP5F1A|ATP5F1E|ATP5MC1|ATP5MC3|ATP5ME|ATP5PO|NDUFA1|NDUFA2|NDUFA3|NDUFA7|NDUFA8|NDUFA9|NDUFB4|NDUFB5|NDUFB8|NDUFC2|NDUFS4|NDUFS5|SDHD|ATP5MF|ATP5PD|ATP5MG|NME7|SLC35B3|NDUFA13|NDUFB11|NDUFA12|PPCDC|ATP5MK|UPRT	-8.5
GO Biological Processes	GO:1901293	nucleoside phosphate biosynthetic process	-11	NUDT2|ATP5F1A|ATP5F1E|ATP5MC1|ATP5MC3|ATP5ME|ATP5PO|NDUFA1|NDUFA2|NDUFA3|NDUFA7|NDUFA8|NDUFA9|NDUFB4|NDUFB5|NDUFB8|NDUFC2|NDUFS4|NDUFS5|SDHD|ATP5MF|ATP5PD|ATP5MG|NME7|SLC35B3|NDUFA13|NDUFB11|NDUFA12|PPCDC|ATP5MK|UPRT	-8.4
GO Biological Processes	GO:0032543	mitochondrial translation	-11	NDUFA7|MRPL23|MRPL33|MRPL19|MRPL3|MRPL42|MRPL13|MRPL18|MRPS18C|MRPL2|MRPL51|MRPS23|RARS2|MRPS14|MRPL14|MRPL36|MRPL11|MRPL9|MRPL43|MRPL52	-8.2
GO Biological Processes	GO:0006123	mitochondrial electron transport, cytochrome c to oxygen	-9.6	COX6B1|COX6C|COX7A1|COX7A2P2|COX7B|COX15|COX3|COX7A2L|COX5A|CYCS	-7.2
GO Biological Processes	GO:0140053	mitochondrial gene expression	-9.3	NDUFA7|MRPL23|MRPL33|MRPL19|MRPL3|MRPL42|MRPL13|MRPL18|MRPS18C|MRPL2|MRPL51|MRPS23|RARS2|MRPS14|MRPL14|MRPL36|MRPL11|MRPL9|TEFM|MRPL43|MRPL52	-6.9
GO Biological Processes	GO:0019693	ribose phosphate metabolic process	-9.3	NUDT2|ATP5F1A|ATP5F1E|ATP5MC1|ATP5MC3|ATP5ME|ATP5PO|HINT1|ITPA|NDUFA1|NDUFA2|NDUFA3|NDUFA7|NDUFA8|NDUFA9|NDUFB4|NDUFB5|NDUFB8|NDUFC2|NDUFS4|NDUFS5|SDHD|ATP5MF|ATP5PD|ATP5MG|NUDT5|NME7|SLC35B3|NDUFA13|NDUFB11|NDUFA12|PPCDC|MCEE|ATP5MK|UPRT	-6.9
GO Biological Processes	GO:0009150	purine ribonucleotide metabolic process	-9	NUDT2|ATP5F1A|ATP5F1E|ATP5MC1|ATP5MC3|ATP5ME|ATP5PO|HINT1|ITPA|NDUFA1|NDUFA2|NDUFA3|NDUFA7|NDUFA8|NDUFA9|NDUFB4|NDUFB5|NDUFB8|NDUFC2|NDUFS4|NDUFS5|SDHD|ATP5MF|ATP5PD|ATP5MG|NME7|SLC35B3|NDUFA13|NDUFB11|NDUFA12|PPCDC|MCEE|ATP5MK	-6.7
GO Biological Processes	GO:0009259	ribonucleotide metabolic process	-9	NUDT2|ATP5F1A|ATP5F1E|ATP5MC1|ATP5MC3|ATP5ME|ATP5PO|HINT1|ITPA|NDUFA1|NDUFA2|NDUFA3|NDUFA7|NDUFA8|NDUFA9|NDUFB4|NDUFB5|NDUFB8|NDUFC2|NDUFS4|NDUFS5|SDHD|ATP5MF|ATP5PD|ATP5MG|NME7|SLC35B3|NDUFA13|NDUFB11|NDUFA12|PPCDC|MCEE|ATP5MK|UPRT	-6.6
GO Biological Processes	GO:0006120	mitochondrial electron transport, NADH to ubiquinone	-8.8	NDUFA1|NDUFA2|NDUFA3|NDUFA7|NDUFA8|NDUFA9|NDUFB4|NDUFB5|NDUFB8|NDUFC2|NDUFS4|NDUFS5	-6.4
GO Biological Processes	GO:0006163	purine nucleotide metabolic process	-8.7	NUDT2|ATP5F1A|ATP5F1E|ATP5MC1|ATP5MC3|ATP5ME|ATP5PO|HINT1|ITPA|NDUFA1|NDUFA2|NDUFA3|NDUFA7|NDUFA8|NDUFA9|NDUFB4|NDUFB5|NDUFB8|NDUFC2|NDUFS4|NDUFS5|SDHD|ATP5MF|ATP5PD|ATP5MG|NME7|SLC35B3|NDUFA13|NDUFB11|NDUFA12|PPCDC|MCEE|ATP5MK	-6.3
GO Biological Processes	GO:0017004	cytochrome complex assembly	-8.7	COX15|COX3|COX17|COX16|UQCC2|COX14|COA6|SMIM20|COA5|C12orf73|PET100	-6.3
GO Biological Processes	GO:0072521	purine-containing compound metabolic process	-8	NUDT2|ATP5F1A|ATP5F1E|ATP5MC1|ATP5MC3|ATP5ME|ATP5PO|HINT1|ITPA|NDUFA1|NDUFA2|NDUFA3|NDUFA7|NDUFA8|NDUFA9|NDUFB4|NDUFB5|NDUFB8|NDUFC2|NDUFS4|NDUFS5|SDHD|ATP5MF|ATP5PD|ATP5MG|NME7|SLC35B3|NDUFA13|NDUFB11|NDUFA12|PPCDC|MCEE|ATP5MK	-5.7
GO Biological Processes	GO:0008535	respiratory chain complex IV assembly	-8	COX15|COX3|COX17|COX16|COX14|COA6|SMIM20|COA5|PET100	-5.6
GO Biological Processes	GO:0009117	nucleotide metabolic process	-7.8	NUDT2|ATP5F1A|ATP5F1E|ATP5MC1|ATP5MC3|ATP5ME|ATP5PO|HINT1|ITPA|NDUFA1|NDUFA2|NDUFA3|NDUFA7|NDUFA8|NDUFA9|NDUFB4|NDUFB5|NDUFB8|NDUFC2|NDUFS4|NDUFS5|SDHD|ATP5MF|ATP5PD|ATP5MG|NUDT5|NME7|SLC35B3|NDUFA13|NDUFB11|NDUFA12|PPCDC|NEIL1|MCEE|ATP5MK|UPRT	-5.5
GO Biological Processes	GO:0006753	nucleoside phosphate metabolic process	-7.6	NUDT2|ATP5F1A|ATP5F1E|ATP5MC1|ATP5MC3|ATP5ME|ATP5PO|HINT1|ITPA|NDUFA1|NDUFA2|NDUFA3|NDUFA7|NDUFA8|NDUFA9|NDUFB4|NDUFB5|NDUFB8|NDUFC2|NDUFS4|NDUFS5|SDHD|ATP5MF|ATP5PD|ATP5MG|NUDT5|NME7|SLC35B3|NDUFA13|NDUFB11|NDUFA12|PPCDC|NEIL1|MCEE|ATP5MK|UPRT	-5.3
GO Biological Processes	GO:0042254	ribosome biogenesis	-7.1	PIN4|RPL7|RPL10|RPL11|RPL23A|RPL24|RPL27|RPL35A|RPL38|RPS8|RPS17|RPS19|RPS21|RPS24|RPS27|RPS28|MPHOSPH6|RPP30|ZNF658|UTP18|POP5|RIOK2|MRPL36|ERI3|SLX9|MALSU1|RBIS	-4.8
GO Biological Processes	GO:0055086	nucleobase-containing small molecule metabolic process	-6.7	NUDT2|ATP5F1A|ATP5F1E|ATP5MC1|ATP5MC3|ATP5ME|ATP5PO|HINT1|ITPA|NDUFA1|NDUFA2|NDUFA3|NDUFA7|NDUFA8|NDUFA9|NDUFB4|NDUFB5|NDUFB8|NDUFC2|NDUFS4|NDUFS5|SDHD|UGP2|ATP5MF|ATP5PD|ATP5MG|NUDT5|NME7|SLC35B3|NDUFA13|NDUFB11|NDUFA12|PPCDC|NEIL1|MCEE|ATP5MK|UPRT	-4.4
GO Biological Processes	GO:1902600	proton transmembrane transport	-6.6	ATP5F1A|ATP5MC1|ATP5MC3|ATP5PO|COX6B1|COX7A1|COX7B|COX15|COX3|SLC25A3|UQCRH|COX7A2L|COX5A|ATP5MF|UQCR10|ATP6V1H	-4.3
GO Biological Processes	GO:0022613	ribonucleoprotein complex biogenesis	-6.2	PIN4|RPL7|RPL10|RPL11|RPL23A|RPL24|RPL27|RPL35A|RPL38|RPS8|RPS17|RPS19|RPS21|RPS24|RPS27|RPS28|SRSF6|SNRPD2|SNRPF|SNRPG|RBM5|MPHOSPH6|RPP30|ZNF658|UTP18|POP5|RIOK2|MRPL36|ERI3|SLX9|MALSU1|RBIS	-3.9
GO Biological Processes	GO:0033617	mitochondrial cytochrome c oxidase assembly	-5	COX17|COX16|COX14|SMIM20|COA5|PET100	-2.8
GO Biological Processes	GO:0006364	rRNA processing	-4.8	PIN4|RPL7|RPL11|RPL27|RPL35A|RPS8|RPS17|RPS19|RPS21|RPS24|RPS27|RPS28|MPHOSPH6|RPP30|UTP18|POP5|RIOK2|ERI3|SLX9	-2.5
GO Biological Processes	GO:0098754	detoxification	-4.5	ADH5|ESD|GSTM3|HBB|MGST3|SLC22A5|TXN|SELENOF|GSTO1|PRDX4|PRDX5|TXNDC17	-2.3
GO Biological Processes	GO:1901137	carbohydrate derivative biosynthetic process	-4.5	NUDT2|ATP5F1A|ATP5F1E|ATP5MC1|ATP5MC3|ATP5ME|ATP5PO|NDUFA1|NDUFA2|NDUFA3|NDUFA7|NDUFA8|NDUFA9|NDUFB4|NDUFB5|NDUFB8|NDUFC2|NDUFS4|NDUFS5|SDHD|OGT|B3GALNT1|ATP5MF|ATP5PD|ATP5MG|NME7|SLC35B3|NDUFA13|NDUFB11|NDUFA12|PPCDC|ATP5MK|UPRT|KRTCAP2	-2.2
GO Biological Processes	GO:0034654	nucleobase-containing compound biosynthetic process	-4.4	NUDT2|ATP5F1A|ATP5F1E|ATP5MC1|ATP5MC3|ATP5ME|ATP5PO|CDK7|NDUFA1|NDUFA2|NDUFA3|NDUFA7|NDUFA8|NDUFA9|NDUFB4|NDUFB5|NDUFB8|NDUFC2|NDUFS4|NDUFS5|POLR2F|SDHD|TAF11|MED21|ATP5MF|ATP5PD|ATP5MG|NME7|POLR1H|SLC35B3|NDUFA13|NDUFB11|ELP2|NDUFA12|POLE4|PPCDC|TEFM|ELOF1|ATP5MK|MED30|UPRT	-2.2
GO Biological Processes	GO:1990748	cellular detoxification	-4.4	ADH5|ESD|GSTM3|HBB|MGST3|TXN|SELENOF|GSTO1|PRDX4|PRDX5|TXNDC17	-2.2
GO Biological Processes	GO:0090407	organophosphate biosynthetic process	-4.3	NUDT2|ATP5F1A|ATP5F1E|ATP5MC1|ATP5MC3|ATP5ME|ATP5PO|NDUFA1|NDUFA2|NDUFA3|NDUFA7|NDUFA8|NDUFA9|NDUFB4|NDUFB5|NDUFB8|NDUFC2|NDUFS4|NDUFS5|SDHD|ATP5MF|ATP5PD|ATP5MG|NME7|SLC35B3|NDUFA13|NDUFB11|NDUFA12|PPCDC|ATP5MK|TAMM41|UPRT	-2.1
GO Biological Processes	GO:0042274	ribosomal small subunit biogenesis	-4.2	RPL38|RPS8|RPS17|RPS19|RPS21|RPS24|RPS27|RPS28|RIOK2|SLX9	-2
GO Biological Processes	GO:0016072	rRNA metabolic process	-4.1	PIN4|RPL7|RPL11|RPL27|RPL35A|RPS8|RPS17|RPS19|RPS21|RPS24|RPS27|RPS28|MPHOSPH6|RPP30|UTP18|POP5|RIOK2|ERI3|SLX9	-1.9
GO Biological Processes	GO:0097237	cellular response to toxic substance	-4.1	ADH5|ESD|GSTM3|HBB|MGST3|TXN|SELENOF|GSTO1|PRDX4|PRDX5|TXNDC17	-1.9
GO Biological Processes	GO:0007007	inner mitochondrial membrane organization	-4	MTX2|NDUFA13|MAIP1|MICOS13|CIBAR1|MTX3|MICOS10	-1.8
GO Biological Processes	GO:0042255	ribosome assembly	-3.6	RPL10|RPL11|RPL23A|RPL24|RPL38|RPS19|RPS27|RPS28	-1.4
GO Biological Processes	GO:0006122	mitochondrial electron transport, ubiquinol to cytochrome c	-3.5	UQCRH|UQCRQ|UQCR10|CYCS	-1.4
GO Biological Processes	GO:1904667	negative regulation of ubiquitin protein ligase activity	-3.5	RPL11|RPL37|RPS20|RPL23	-1.4
GO Biological Processes	GO:0007006	mitochondrial membrane organization	-3.5	VDAC2|MTX2|NDUFA13|TOMM7|MAIP1|ATP5IF1|MICOS13|CIBAR1|BLOC1S2|MTX3|MICOS10	-1.3
GO Biological Processes	GO:0034470	ncRNA processing	-3.2	HNRNPA2B1|PIN4|RPL7|RPL11|RPL27|RPL35A|RPS8|RPS17|RPS19|RPS21|RPS24|RPS27|RPS28|MPHOSPH6|RPP30|UTP18|POP5|ELP2|RIOK2|ERI3|SLX9|TRMT61A|METTL6	-1.1
GO Biological Processes	GO:0097250	mitochondrial respirasome assembly	-3.2	COX7A1|COX7A2P2|COX7A2L	-1.1
GO Biological Processes	GO:0000027	ribosomal large subunit assembly	-3.2	RPL10|RPL11|RPL23A|RPL24|RPL38	-1.1
GO Biological Processes	GO:0000398	mRNA splicing, via spliceosome	-3.1	HNRNPA1|HNRNPA2B1|HNRNPH1|SRSF6|SNRNP70|SNRPA1|SNRPD2|SNRPF|SNRPG|RBM5|LSM3|TRA2A|RSRC1|LSM7|MAGOHB|HNRNPA3	-1
GO Biological Processes	GO:0000377	RNA splicing, via transesterification reactions with bulged adenosine as nucleophile	-3.1	HNRNPA1|HNRNPA2B1|HNRNPH1|SRSF6|SNRNP70|SNRPA1|SNRPD2|SNRPF|SNRPG|RBM5|LSM3|TRA2A|RSRC1|LSM7|MAGOHB|HNRNPA3	-1
GO Biological Processes	GO:0006839	mitochondrial transport	-3.1	HSPD1|VDAC2|TIMM17A|MTX2|NDUFA13|TMEM14C|TOMM7|MAIP1|MGARP|ATP5IF1|IMMP1L|BLOC1S2	-1
GO Biological Processes	GO:0042273	ribosomal large subunit biogenesis	-3.1	RPL7|RPL10|RPL11|RPL23A|RPL24|RPL35A|RPL38|MALSU1	-1
GO Biological Processes	GO:0072655	establishment of protein localization to mitochondrion	-3.1	HSPD1|TIMM17A|MTX2|NDUFA13|TOMM7|MAIP1|MGARP|IMMP1L	-1
GO Biological Processes	GO:0008380	RNA splicing	-3.1	HNRNPA1|HNRNPA2B1|HNRNPH1|SRSF6|SNRNP70|SNRPA1|SNRPD2|SNRPF|SNRPG|TAF15|SRSF11|ZRANB2|SUGP2|RBM5|TARDBP|LSM3|TRA2A|RSRC1|LSM7|MAGOHB|HNRNPA3	-0.99
GO Biological Processes	GO:0000375	RNA splicing, via transesterification reactions	-3	HNRNPA1|HNRNPA2B1|HNRNPH1|SRSF6|SNRNP70|SNRPA1|SNRPD2|SNRPF|SNRPG|RBM5|LSM3|TRA2A|RSRC1|LSM7|MAGOHB|HNRNPA3	-0.95
GO Biological Processes	GO:0006995	cellular response to nitrogen starvation	-3	ATG5|GABARAPL2|MAP1LC3B	-0.91
GO Biological Processes	GO:0043562	cellular response to nitrogen levels	-3	ATG5|GABARAPL2|MAP1LC3B	-0.91
GO Biological Processes	GO:0036261	7-methylguanosine cap hypermethylation	-3	SNRPD2|SNRPF|SNRPG	-0.91
GO Biological Processes	GO:0070071	proton-transporting two-sector ATPase complex assembly	-3	TMEM70|ATP23|TMEM199|FMC1	-0.9
GO Biological Processes	GO:0098869	cellular oxidant detoxification	-2.9	HBB|MGST3|TXN|SELENOF|GSTO1|PRDX4|PRDX5|TXNDC17	-0.86
GO Biological Processes	GO:1903321	negative regulation of protein modification by small protein conjugation or removal	-2.9	PPIA|RPL11|RPL37|RPS3|RPS20|OGT|RPL23|ATG5|COPS9	-0.85
GO Biological Processes	GO:0000028	ribosomal small subunit assembly	-2.9	RPL38|RPS19|RPS27|RPS28	-0.8
GO Biological Processes	GO:0009636	response to toxic substance	-2.9	ADH5|ALAD|ESD|GSTM3|HBB|MGST3|SLC22A5|TXN|SELENOF|GSTO1|PRDX4|PRDX5|HTRA2|TXNDC17	-0.8
GO Biological Processes	GO:0006626	protein targeting to mitochondrion	-2.9	HSPD1|TIMM17A|MTX2|NDUFA13|TOMM7|MGARP|IMMP1L	-0.8
GO Biological Processes	GO:0070585	protein localization to mitochondrion	-2.9	HSPD1|TIMM17A|MTX2|NDUFA13|TOMM7|MAIP1|MGARP|IMMP1L	-0.8
GO Biological Processes	GO:0043461	proton-transporting ATP synthase complex assembly	-2.8	TMEM70|ATP23|FMC1	-0.75
GO Biological Processes	GO:0033615	mitochondrial proton-transporting ATP synthase complex assembly	-2.8	TMEM70|ATP23|FMC1	-0.75
GO Biological Processes	GO:0034660	ncRNA metabolic process	-2.7	CDK7|HNRNPA2B1|PIN4|RPL7|RPL11|RPL27|RPL35A|RPS8|RPS17|RPS19|RPS21|RPS24|RPS27|RPS28|MPHOSPH6|RPP30|HARS2|UTP18|POP5|ELP2|RIOK2|RARS2|ERI3|SLX9|TRMT61A|METTL6	-0.67
GO Biological Processes	GO:0099022	vesicle tethering	-2.7	TRAPPC2|TRAPPC4|WDR11|C17orf75|TRAPPC13	-0.66
GO Biological Processes	GO:1905907	negative regulation of amyloid fibril formation	-2.6	PFDN1|VBP1|PFDN6	-0.61
GO Biological Processes	GO:1990542	mitochondrial transmembrane transport	-2.6	HSPD1|SLC25A3|TIMM17A|MRPL18|TOMM7|MAIP1|SMDT1|SFXN2	-0.6
GO Biological Processes	GO:0031397	negative regulation of protein ubiquitination	-2.6	PPIA|RPL11|RPL37|RPS3|RPS20|OGT|RPL23|ATG5	-0.6
GO Biological Processes	GO:2000434	regulation of protein neddylation	-2.6	RPL11|COPS5|COPS4|COPS9	-0.55
GO Biological Processes	GO:0022618	ribonucleoprotein complex assembly	-2.5	RPL10|RPL11|RPL23A|RPL24|RPL38|RPS19|RPS27|RPS28|SRSF6|SNRPD2|SNRPF|SNRPG|RBM5	-0.53
GO Biological Processes	GO:0065002	intracellular protein transmembrane transport	-2.4	HSPD1|C2CD5|TIMM17A|SEC61B|SEC61G|TOMM7	-0.44
GO Biological Processes	GO:0051444	negative regulation of ubiquitin-protein transferase activity	-2.4	RPL11|RPL37|RPS20|RPL23	-0.41
GO Biological Processes	GO:0045116	protein neddylation	-2.4	NEDD8|NAE1|COPS5|COPS4	-0.41
GO Biological Processes	GO:1904666	regulation of ubiquitin protein ligase activity	-2.4	RPL11|RPL37|RPS20|RPL23	-0.41
GO Biological Processes	GO:0002082	regulation of oxidative phosphorylation	-2.4	COX7A1|COX7A2P2|COX7A2L|UQCC2	-0.41
GO Biological Processes	GO:0030490	maturation of SSU-rRNA	-2.4	RPS8|RPS19|RPS21|RPS28|RIOK2|SLX9	-0.41
GO Biological Processes	GO:0071826	ribonucleoprotein complex subunit organization	-2.4	RPL10|RPL11|RPL23A|RPL24|RPL38|RPS19|RPS27|RPS28|SRSF6|SNRPD2|SNRPF|SNRPG|RBM5	-0.4
GO Biological Processes	GO:2001140	positive regulation of phospholipid transport	-2.4	DBI|ABCA7|TRIAP1	-0.39
GO Biological Processes	GO:0045454	cell redox homeostasis	-2.3	TXN|PRDX4|PRDX5|GLRX2|BOLA3	-0.36
GO Biological Processes	GO:0042168	heme metabolic process	-2.3	ALAD|COX15|TMEM14C|BDH2|ATP5IF1	-0.36
GO Biological Processes	GO:0051204	protein insertion into mitochondrial membrane	-2.3	MTX2|NDUFA13|TOMM7|MAIP1	-0.29
GO Biological Processes	GO:1905906	regulation of amyloid fibril formation	-2.2	PFDN1|VBP1|PFDN6	-0.29
GO Biological Processes	GO:2001138	regulation of phospholipid transport	-2.2	DBI|ABCA7|TRIAP1	-0.29
GO Biological Processes	GO:0006783	heme biosynthetic process	-2.2	ALAD|COX15|TMEM14C|ATP5IF1	-0.24
GO Biological Processes	GO:0046185	aldehyde catabolic process	-2.1	ADH5|ALDH2|ESD	-0.2
GO Biological Processes	GO:1904923	regulation of autophagy of mitochondrion in response to mitochondrial depolarization	-2.1	HTRA2|TOMM7|ATP5IF1	-0.2
GO Biological Processes	GO:0006397	mRNA processing	-2.1	HNRNPA1|HNRNPA2B1|HNRNPH1|SRSF6|SNRNP70|SNRPA1|SNRPD2|SNRPF|SNRPG|PABPN1|SRSF11|ZRANB2|SUGP2|RBM5|TARDBP|LSM3|TRA2A|RSRC1|LSM7|MAGOHB|HNRNPA3	-0.19
GO Biological Processes	GO:0090151	establishment of protein localization to mitochondrial membrane	-2.1	MTX2|NDUFA13|TOMM7|MAIP1	-0.13
GO Biological Processes	GO:0036260	RNA capping	-2	SNRPD2|SNRPF|SNRPG	-0.12
GO Biological Processes	GO:1903578	regulation of ATP metabolic process	-2	COX7A1|COX7A2P2|OGT|COX7A2L|UQCC2|ATP5IF1|ATPSCKMT	-0.11
GO Biological Processes	GO:0071806	protein transmembrane transport	-2	HSPD1|C2CD5|TIMM17A|SEC61B|SEC61G|TOMM7	-0.11
GO Biological Processes	GO:0043457	regulation of cellular respiration	-2	COX7A1|COX7A2P2|COX7A2L|CISD1|UQCC2	-0.11
GO Biological Processes	GO:0006778	porphyrin-containing compound metabolic process	-2	ALAD|COX15|TMEM14C|BDH2|ATP5IF1	-0.11
GO Cellular Components	GO:0005743	mitochondrial inner membrane	-46	ATP5F1A|ATP5F1E|ATP5MC1|ATP5MC3|ATP5ME|ATP5PO|COX6B1|COX6C|COX7A1|COX7A2P2|COX7B|COX15|HSPD1|LDHB|COX3|NDUFA1|NDUFA2|NDUFA3|NDUFA7|NDUFA8|NDUFA9|NDUFB4|NDUFB5|NDUFB8|NDUFC2|NDUFS4|NDUFS5|SLC25A3|MRPL23|RPS3|SDHD|UQCRH|COX7A2L|COX5A|ATP5MF|MRPL33|MRPL19|TIMM17A|ATP5PD|ATP5MG|MTX2|MRPL3|UQCRQ|MRPL42|MRPL13|MRPL18|UQCR10|MRPS18C|MRPL2|NDUFA13|COX16|MRPL51|TMEM14C|MRPS23|CYCS|NDUFB11|TMEM70|NDUFA12|M…	-42
GO Cellular Components	GO:0005740	mitochondrial envelope	-44	ATP5F1A|ATP5F1E|ATP5MC1|ATP5MC3|ATP5ME|ATP5PO|COX6B1|COX6C|COX7A1|COX7A2P2|COX7B|COX15|HSPD1|LDHB|COX3|NDUFA1|NDUFA2|NDUFA3|NDUFA7|NDUFA8|NDUFA9|NDUFB4|NDUFB5|NDUFB8|NDUFC2|NDUFS4|NDUFS5|SLC25A3|MRPL23|RPS3|RPS27A|SDHD|UBC|UQCRH|VDAC2|HSD17B8|OGT|COX7A2L|COX5A|ATP5MF|MRPL33|MRPL19|COX17|TIMM17A|ATP5PD|ATP5MG|MTX2|MRPL3|FAM162A|UQCRQ|HTRA2|MRPL42|MRPL13|MRPL18|UQCR10|MRPS18C|MRPL2|NDUFA13|COX16|MR…	-40
GO Cellular Components	GO:0031966	mitochondrial membrane	-43	ATP5F1A|ATP5F1E|ATP5MC1|ATP5MC3|ATP5ME|ATP5PO|COX6B1|COX6C|COX7A1|COX7A2P2|COX7B|COX15|HSPD1|LDHB|COX3|NDUFA1|NDUFA2|NDUFA3|NDUFA7|NDUFA8|NDUFA9|NDUFB4|NDUFB5|NDUFB8|NDUFC2|NDUFS4|NDUFS5|SLC25A3|MRPL23|RPS3|RPS27A|SDHD|UBC|UQCRH|VDAC2|OGT|COX7A2L|COX5A|ATP5MF|MRPL33|MRPL19|TIMM17A|ATP5PD|ATP5MG|MTX2|MRPL3|FAM162A|UQCRQ|HTRA2|MRPL42|MRPL13|MRPL18|UQCR10|MRPS18C|MRPL2|NDUFA13|COX16|MRPL51|TMEM14C|M…	-39
GO Cellular Components	GO:0019866	organelle inner membrane	-43	ATP5F1A|ATP5F1E|ATP5MC1|ATP5MC3|ATP5ME|ATP5PO|COX6B1|COX6C|COX7A1|COX7A2P2|COX7B|COX15|HSPD1|LDHB|COX3|NDUFA1|NDUFA2|NDUFA3|NDUFA7|NDUFA8|NDUFA9|NDUFB4|NDUFB5|NDUFB8|NDUFC2|NDUFS4|NDUFS5|SLC25A3|MRPL23|RPS3|SDHD|UQCRH|COX7A2L|COX5A|ATP5MF|MRPL33|MRPL19|TIMM17A|ATP5PD|ATP5MG|MTX2|MRPL3|UNC50|UQCRQ|MRPL42|MRPL13|MRPL18|UQCR10|MRPS18C|MRPL2|NDUFA13|COX16|MRPL51|TMEM14C|MRPS23|CYCS|NDUFB11|TMEM70|NDU…	-39
GO Cellular Components	GO:0044391	ribosomal subunit	-39	RPL7|RPL9|RPL10|RPL11|RPL17|RPL18|RPL23A|MRPL23|RPL24|RPL27|RPL30|RPL27A|RPL29|RPL31|RPL32|RPL34|RPL35A|RPL37|RPL37A|RPL38|RPL39|RPS3|RPS8|RPS12|RPS13|RPS17|RPS19|RPS20|RPS21|RPS23|RPS24|RPS27|RPS27A|RPS28|RPS29|RPL23|MRPL33|MRPL19|MRPL3|MRPL42|MRPL13|MRPL18|MRPS18C|MRPL2|MRPL51|MRPS23|MRPS14|MRPL14|MRPL36|MRPL11|MRPL9|MRPL43|MRPL52	-35
GO Cellular Components	GO:0005840	ribosome	-38	BTF3|NDUFA7|RPL7|RPL9|RPL10|RPL11|RPL17|RPL18|RPL23A|MRPL23|RPL24|RPL27|RPL30|RPL27A|RPL29|RPL31|RPL32|RPL34|RPL35A|RPL37|RPL37A|RPL38|RPL39|RPS3|RPS8|RPS12|RPS13|RPS17|RPS19|RPS20|RPS21|RPS23|RPS24|RPS27|RPS27A|RPS28|RPS29|RPL23|MRPL33|MRPL19|MRPL3|MRPL42|MRPL13|MRPL18|MRPS18C|MRPL2|MRPL51|MRPS23|MRPS14|MRPL14|MRPL36|MRPL11|MRPL9|MRPL43|MRPL52|RPL22L1	-35
GO Cellular Components	GO:0098798	mitochondrial protein-containing complex	-38	ATP5F1A|ATP5F1E|ATP5MC1|ATP5MC3|ATP5ME|ATP5PO|COX6B1|COX6C|COX7A1|COX7A2P2|COX7B|COX3|NDUFA1|NDUFA2|NDUFA3|NDUFA7|NDUFA8|NDUFA9|NDUFB4|NDUFB5|NDUFB8|NDUFC2|NDUFS4|NDUFS5|MRPL23|SDHD|UQCRH|COX7A2L|COX5A|ATP5MF|MRPL33|MRPL19|TIMM17A|ATP5PD|ATP5MG|MTX2|MRPL3|UQCRQ|MRPL42|MRPL13|MRPL18|UQCR10|MRPS18C|MRPL2|NDUFA13|MRPL51|MRPS23|NDUFB11|TOMM7|NDUFA12|MRPS14|MRPL14|MRPL36|MRPL11|MRPL9|MRPL43|ATP5MK|SMD…	-34
GO Cellular Components	GO:0098800	inner mitochondrial membrane protein complex	-31	ATP5F1A|ATP5F1E|ATP5MC1|ATP5MC3|ATP5ME|ATP5PO|COX6B1|COX6C|COX7A1|COX7A2P2|COX7B|COX3|NDUFA1|NDUFA2|NDUFA3|NDUFA7|NDUFA8|NDUFA9|NDUFB4|NDUFB5|NDUFB8|NDUFC2|NDUFS4|NDUFS5|SDHD|UQCRH|COX7A2L|COX5A|ATP5MF|TIMM17A|ATP5PD|ATP5MG|MTX2|UQCRQ|UQCR10|NDUFA13|NDUFB11|NDUFA12|ATP5MK|SMDT1|MICOS13|IMMP1L|MTX3|MICOS10	-28
GO Cellular Components	GO:0022626	cytosolic ribosome	-29	RPL7|RPL9|RPL10|RPL11|RPL17|RPL18|RPL23A|RPL24|RPL27|RPL30|RPL27A|RPL29|RPL31|RPL32|RPL34|RPL35A|RPL37|RPL37A|RPL38|RPL39|RPS3|RPS8|RPS12|RPS13|RPS17|RPS19|RPS20|RPS21|RPS23|RPS24|RPS27|RPS27A|RPS28|RPS29|RPL23	-25
GO Cellular Components	GO:1990904	ribonucleoprotein complex	-28	BTF3|CIRBP|HNRNPA1|HNRNPA2B1|HNRNPH1|RPL7|RPL9|RPL10|RPL11|RPL17|RPL18|RPL23A|MRPL23|RPL24|RPL27|RPL30|RPL27A|RPL29|RPL31|RPL32|RPL34|RPL35A|RPL37|RPL37A|RPL38|RPL39|RPS3|RPS8|RPS12|RPS13|RPS17|RPS19|RPS20|RPS21|RPS23|RPS24|RPS27|RPS27A|RPS28|RPS29|SNRNP70|SNRPA1|SNRPD2|SNRPF|SNRPG|VBP1|PABPN1|RPL23|MRPL33|MRPL19|RBM5|RPP30|MRPL3|LSM3|MRPL42|MRPL13|MRPL18|TRA2A|MRPS18C|MRPL2|UTP18|MRPL51|POP5|MRP…	-25
GO Cellular Components	GO:0015934	large ribosomal subunit	-28	RPL7|RPL9|RPL10|RPL11|RPL17|RPL18|RPL23A|MRPL23|RPL24|RPL27|RPL30|RPL27A|RPL29|RPL31|RPL32|RPL34|RPL35A|RPL37|RPL37A|RPL38|RPL39|RPL23|MRPL33|MRPL19|MRPL3|MRPL42|MRPL13|MRPL18|MRPL2|MRPL51|MRPL14|MRPL36|MRPL11|MRPL9|MRPL43|MRPL52	-25
GO Cellular Components	GO:0070469	respirasome	-23	COX6B1|COX6C|COX7A1|COX7A2P2|COX7B|COX15|COX3|NDUFA1|NDUFA2|NDUFA3|NDUFA7|NDUFA8|NDUFA9|NDUFB4|NDUFB5|NDUFB8|NDUFC2|NDUFS4|NDUFS5|SDHD|UQCRH|COX7A2L|COX5A|UQCRQ|UQCR10|NDUFA13|CYCS|NDUFB11|NDUFA12|COA6	-20
GO Cellular Components	GO:0098803	respiratory chain complex	-22	COX6B1|COX6C|COX7A1|COX7A2P2|COX7B|COX3|NDUFA1|NDUFA2|NDUFA3|NDUFA7|NDUFA8|NDUFA9|NDUFB4|NDUFB5|NDUFB8|NDUFC2|NDUFS4|NDUFS5|SDHD|UQCRH|COX7A2L|COX5A|UQCRQ|UQCR10|NDUFA13|NDUFB11|NDUFA12|COA6	-19
GO Cellular Components	GO:0005746	mitochondrial respirasome	-21	COX6B1|COX6C|COX7A1|COX7A2P2|COX7B|COX15|COX3|NDUFA1|NDUFA2|NDUFA3|NDUFA7|NDUFA8|NDUFA9|NDUFB4|NDUFB5|NDUFB8|NDUFC2|NDUFS4|NDUFS5|SDHD|UQCRH|COX7A2L|COX5A|UQCRQ|UQCR10|NDUFA13|NDUFB11|NDUFA12	-19
GO Cellular Components	GO:0022625	cytosolic large ribosomal subunit	-18	RPL7|RPL9|RPL10|RPL11|RPL17|RPL18|RPL23A|RPL24|RPL27|RPL30|RPL27A|RPL29|RPL31|RPL32|RPL34|RPL35A|RPL37|RPL37A|RPL38|RPL39|RPL23	-15
GO Cellular Components	GO:0005759	mitochondrial matrix	-13	ALDH2|NUDT2|ATP5F1A|ATP5F1E|ETFA|FDX1|HSPD1|NDUFA7|NDUFA9|NDUFB8|PIN4|MRPL23|RPS3|SSBP1|VDAC2|HSD17B8|MRPL33|MRPL19|MRPL3|HARS2|PRDX5|HIBCH|MRPL42|MRPL13|MRPL18|GLRX2|MRPS18C|MRPL2|MRPL51|MRPS23|ABHD10|RARS2|MRPS14|MRPL14|MRPL36|MRPL11|MRPL9|MAIP1|TEFM|UQCC2|MRPL43|MCEE|SMDT1|FDX2|MRPL52|PPM1K|D2HGDH	-11
GO Cellular Components	GO:1990204	oxidoreductase complex	-12	ETFA|LDHB|NDUFA1|NDUFA2|NDUFA3|NDUFA7|NDUFA8|NDUFA9|NDUFB4|NDUFB5|NDUFB8|NDUFC2|NDUFS4|NDUFS5|SDHD|UQCRH|HSD17B8|UQCRQ|UQCR10|NDUFA13|NDUFB11|NDUFA12|CYB5B	-10
GO Cellular Components	GO:0042788	polysomal ribosome	-12	BTF3|RPL11|RPL18|RPL24|RPL30|RPL31|RPL32|RPL38|RPL39|RPS21|RPS23|RPS28|RPS29	-9.9
GO Cellular Components	GO:0015935	small ribosomal subunit	-12	RPS3|RPS8|RPS12|RPS13|RPS17|RPS19|RPS20|RPS21|RPS23|RPS24|RPS27|RPS27A|RPS28|RPS29|MRPL42|MRPS18C|MRPS23|MRPS14	-9.2
GO Cellular Components	GO:0030964	NADH dehydrogenase complex	-12	NDUFA1|NDUFA2|NDUFA3|NDUFA7|NDUFA8|NDUFA9|NDUFB4|NDUFB5|NDUFB8|NDUFC2|NDUFS4|NDUFS5|NDUFA13|NDUFB11|NDUFA12	-9.2
GO Cellular Components	GO:0005747	mitochondrial respiratory chain complex I	-12	NDUFA1|NDUFA2|NDUFA3|NDUFA7|NDUFA8|NDUFA9|NDUFB4|NDUFB5|NDUFB8|NDUFC2|NDUFS4|NDUFS5|NDUFA13|NDUFB11|NDUFA12	-9.2
GO Cellular Components	GO:0045271	respiratory chain complex I	-12	NDUFA1|NDUFA2|NDUFA3|NDUFA7|NDUFA8|NDUFA9|NDUFB4|NDUFB5|NDUFB8|NDUFC2|NDUFS4|NDUFS5|NDUFA13|NDUFB11|NDUFA12	-9.2
GO Cellular Components	GO:0005761	mitochondrial ribosome	-11	NDUFA7|MRPL23|MRPL33|MRPL19|MRPL3|MRPL42|MRPL13|MRPL18|MRPS18C|MRPL2|MRPL51|MRPS23|MRPS14|MRPL14|MRPL36|MRPL11|MRPL9|MRPL43|MRPL52	-8.9
GO Cellular Components	GO:0000313	organellar ribosome	-11	NDUFA7|MRPL23|MRPL33|MRPL19|MRPL3|MRPL42|MRPL13|MRPL18|MRPS18C|MRPL2|MRPL51|MRPS23|MRPS14|MRPL14|MRPL36|MRPL11|MRPL9|MRPL43|MRPL52	-8.9
GO Cellular Components	GO:0022627	cytosolic small ribosomal subunit	-11	RPS3|RPS8|RPS12|RPS13|RPS17|RPS19|RPS20|RPS21|RPS23|RPS24|RPS27|RPS27A|RPS28|RPS29	-8.9
GO Cellular Components	GO:0070069	cytochrome complex	-11	COX6B1|COX6C|COX7A1|COX7A2P2|COX7B|COX15|COX3|UQCRH|COX7A2L|COX5A|UQCRQ|UQCR10|COA6	-8.6
GO Cellular Components	GO:0005762	mitochondrial large ribosomal subunit	-11	MRPL23|MRPL33|MRPL19|MRPL3|MRPL42|MRPL13|MRPL18|MRPL2|MRPL51|MRPL14|MRPL36|MRPL11|MRPL9|MRPL43|MRPL52	-8.5
GO Cellular Components	GO:0000315	organellar large ribosomal subunit	-11	MRPL23|MRPL33|MRPL19|MRPL3|MRPL42|MRPL13|MRPL18|MRPL2|MRPL51|MRPL14|MRPL36|MRPL11|MRPL9|MRPL43|MRPL52	-8.5
GO Cellular Components	GO:0005753	mitochondrial proton-transporting ATP synthase complex	-10	ATP5F1A|ATP5F1E|ATP5MC1|ATP5MC3|ATP5ME|ATP5PO|ATP5MF|ATP5PD|ATP5MG|ATP5MK	-8
GO Cellular Components	GO:0045259	proton-transporting ATP synthase complex	-10	ATP5F1A|ATP5F1E|ATP5MC1|ATP5MC3|ATP5ME|ATP5PO|ATP5MF|ATP5PD|ATP5MG|ATP5MK	-7.8
GO Cellular Components	GO:0005844	polysome	-9.6	BTF3|RPL11|RPL18|RPL24|RPL30|RPL31|RPL32|RPL38|RPL39|RPS3|RPS21|RPS23|RPS28|RPS29|VBP1	-7.2
GO Cellular Components	GO:0016469	proton-transporting two-sector ATPase complex	-8.2	ATP5F1A|ATP5F1E|ATP5MC1|ATP5MC3|ATP5ME|ATP5PO|ATP5MF|ATP5PD|ATP5MG|ATP6V1H|ATP5MK|TMEM199	-5.9
GO Cellular Components	GO:0045277	respiratory chain complex IV	-7.8	COX6B1|COX6C|COX7A1|COX7A2P2|COX7B|COX3|COX7A2L|COX5A|COA6	-5.4
GO Cellular Components	GO:0045263	proton-transporting ATP synthase complex, coupling factor F(o)	-7.7	ATP5MC1|ATP5MC3|ATP5ME|ATP5PO|ATP5MF|ATP5PD|ATP5MG	-5.3
GO Cellular Components	GO:0000276	mitochondrial proton-transporting ATP synthase complex, coupling factor F(o)	-7.1	ATP5MC1|ATP5MC3|ATP5ME|ATP5PO|ATP5PD|ATP5MG	-4.8
GO Cellular Components	GO:0005751	mitochondrial respiratory chain complex IV	-6.8	COX6B1|COX6C|COX7A1|COX7A2P2|COX7B|COX3|COX7A2L|COX5A	-4.6
GO Cellular Components	GO:0031305	integral component of mitochondrial inner membrane	-5.7	SLC25A3|TIMM17A|MTX2|COX16|SMDT1|SFXN2|MICOS13|MTX3|MICOS10|PET100	-3.4
GO Cellular Components	GO:0031304	intrinsic component of mitochondrial inner membrane	-5.6	SLC25A3|TIMM17A|MTX2|COX16|SMDT1|SFXN2|MICOS13|MTX3|MICOS10|PET100	-3.3
GO Cellular Components	GO:0033177	proton-transporting two-sector ATPase complex, proton-transporting domain	-5.3	ATP5MC1|ATP5MC3|ATP5ME|ATP5PO|ATP5MF|ATP5PD|ATP5MG	-3
GO Cellular Components	GO:0032592	integral component of mitochondrial membrane	-5.2	SLC25A3|TIMM17A|MTX2|COX16|TMEM70|MGARP|SMDT1|SFXN2|MICOS13|MTX3|MICOS10|PET100	-3
GO Cellular Components	GO:0098573	intrinsic component of mitochondrial membrane	-5.1	SLC25A3|TIMM17A|MTX2|COX16|TMEM70|MGARP|SMDT1|SFXN2|MICOS13|MTX3|MICOS10|PET100	-2.8
GO Cellular Components	GO:0071013	catalytic step 2 spliceosome	-4.4	HNRNPA1|HNRNPA2B1|HNRNPH1|SNRPA1|SNRPD2|SNRPF|SNRPG|LSM3|LSM7|MAGOHB|HNRNPA3	-2.2
GO Cellular Components	GO:0005791	rough endoplasmic reticulum	-4.1	RPL18|RPL27|RPS21|RPS23|RPS28|RPS29|SSR4|SEC61B|SEC61G|RAB14	-2
GO Cellular Components	GO:0005681	spliceosomal complex	-4.1	CIRBP|HNRNPA1|HNRNPA2B1|HNRNPH1|SNRNP70|SNRPA1|SNRPD2|SNRPF|SNRPG|RBM5|LSM3|TRA2A|LSM7|MAGOHB|CCDC12|HNRNPA3	-1.9
GO Cellular Components	GO:0030867	rough endoplasmic reticulum membrane	-4.1	RPL27|RPS28|RPS29|SSR4|SEC61B|SEC61G	-1.9
GO Cellular Components	GO:0098556	cytoplasmic side of rough endoplasmic reticulum membrane	-3.9	RPL27|RPS28|RPS29	-1.7
GO Cellular Components	GO:0005742	mitochondrial outer membrane translocase complex	-3.6	MTX2|TOMM7|MICOS13|MTX3|MICOS10	-1.4
GO Cellular Components	GO:0098799	outer mitochondrial membrane protein complex	-3.5	MTX2|TOMM7|MICOS13|MTX3|MICOS10	-1.3
GO Cellular Components	GO:0140275	MIB complex	-3.4	MTX2|MICOS13|MTX3|MICOS10	-1.2
GO Cellular Components	GO:0001401	SAM complex	-3.4	MTX2|MICOS13|MTX3|MICOS10	-1.2
GO Cellular Components	GO:0071005	U2-type precatalytic spliceosome	-3.2	SNRPA1|SNRPD2|SNRPF|SNRPG|LSM3|LSM7|MAGOHB	-1.1
GO Cellular Components	GO:0016272	prefoldin complex	-3.2	PFDN1|VBP1|PFDN6	-1.1
GO Cellular Components	GO:0045261	proton-transporting ATP synthase complex, catalytic core F(1)	-3.2	ATP5F1A|ATP5F1E|ATP5PO	-1.1
GO Cellular Components	GO:0071256	translocon complex	-3.2	SSR4|SEC61B|SEC61G	-1.1
GO Cellular Components	GO:0071011	precatalytic spliceosome	-3.2	SNRPA1|SNRPD2|SNRPF|SNRPG|LSM3|LSM7|MAGOHB	-1.1
GO Cellular Components	GO:0097525	spliceosomal snRNP complex	-3.1	SNRNP70|SNRPA1|SNRPD2|SNRPF|SNRPG|LSM3|LSM7	-1
GO Cellular Components	GO:1902495	transmembrane transporter complex	-3.1	NDUFA1|NDUFA2|NDUFA3|NDUFA7|NDUFA8|NDUFA9|NDUFB4|NDUFB5|NDUFB8|NDUFC2|NDUFS4|NDUFS5|FXYD1|PTPA|UQCRH|UQCRQ|UQCR10|NDUFA13|NDUFB11|NDUFA12|SMDT1	-0.96
GO Cellular Components	GO:0005684	U2-type spliceosomal complex	-2.9	SNRNP70|SNRPA1|SNRPD2|SNRPF|SNRPG|LSM3|LSM7|MAGOHB|CCDC12	-0.82
GO Cellular Components	GO:0033178	proton-transporting two-sector ATPase complex, catalytic domain	-2.9	ATP5F1A|ATP5F1E|ATP5PO|ATP6V1H	-0.8
GO Cellular Components	GO:0005685	U1 snRNP	-2.9	SNRNP70|SNRPD2|SNRPF|SNRPG	-0.8
GO Cellular Components	GO:0046540	U4/U6 x U5 tri-snRNP complex	-2.8	SNRPD2|SNRPF|SNRPG|LSM3|LSM7	-0.78
GO Cellular Components	GO:0097526	spliceosomal tri-snRNP complex	-2.8	SNRPD2|SNRPF|SNRPG|LSM3|LSM7	-0.78
GO Cellular Components	GO:0000502	proteasome complex	-2.8	PSMA2|PSMB3|PSMB4|PSMB7|PSMC2|PSMC6|PSMD8	-0.76
GO Cellular Components	GO:0030061	mitochondrial crista	-2.8	TMEM70|ATPSCKMT|CIBAR1	-0.75
GO Cellular Components	GO:0005839	proteasome core complex	-2.8	PSMA2|PSMB3|PSMB4|PSMB7	-0.71
GO Cellular Components	GO:1990351	transporter complex	-2.7	NDUFA1|NDUFA2|NDUFA3|NDUFA7|NDUFA8|NDUFA9|NDUFB4|NDUFB5|NDUFB8|NDUFC2|NDUFS4|NDUFS5|FXYD1|PTPA|UQCRH|UQCRQ|UQCR10|NDUFA13|NDUFB11|NDUFA12|SMDT1	-0.67
GO Cellular Components	GO:0030532	small nuclear ribonucleoprotein complex	-2.7	SNRNP70|SNRPA1|SNRPD2|SNRPF|SNRPG|LSM3|LSM7	-0.67
GO Cellular Components	GO:1905369	endopeptidase complex	-2.7	PSMA2|PSMB3|PSMB4|PSMB7|PSMC2|PSMC6|PSMD8|HTRA2	-0.66
GO Cellular Components	GO:0031301	integral component of organelle membrane	-2.7	SLC25A3|PEX3|PEX11B|TIMM17A|MTX2|EBP|UNC50|SLC35B3|DERL2|IER3IP1|COX16|HACD3|TMEM70|SLC35A5|MGARP|SMDT1|SFXN2|MICOS13|MTX3|MICOS10|PET100	-0.65
GO Cellular Components	GO:0005686	U2 snRNP	-2.7	SNRPA1|SNRPD2|SNRPF|SNRPG	-0.63
GO Cellular Components	GO:0005687	U4 snRNP	-2.6	SNRPD2|SNRPF|SNRPG	-0.61
GO Cellular Components	GO:0005741	mitochondrial outer membrane	-2.6	ATP5MC3|RPS27A|UBC|VDAC2|MTX2|TOMM7|CISD1|CYB5B|HINT2|MGARP|RTN4IP1|MICOS13|MTX3|MICOS10	-0.61
GO Cellular Components	GO:0005758	mitochondrial intermembrane space	-2.6	NDUFA8|NDUFS5|COX17|HTRA2|TRIAP1|CYCS|UQCC2|COA6	-0.6
GO Cellular Components	GO:0019774	proteasome core complex, beta-subunit complex	-2.5	PSMB3|PSMB4|PSMB7	-0.48
GO Cellular Components	GO:0005689	U12-type spliceosomal complex	-2.5	SNRPD2|SNRPF|SNRPG|LSM7	-0.48
GO Cellular Components	GO:1904813	ficolin-1-rich granule lumen	-2.4	ALAD|HBB|PPIA|PSMA2|PSMB7|PSMC2|GMFG|PRDX4|COMMD3|YPEL5	-0.41
GO Cellular Components	GO:0045275	respiratory chain complex III	-2.4	UQCRH|UQCRQ|UQCR10	-0.39
GO Cellular Components	GO:0005750	mitochondrial respiratory chain complex III	-2.4	UQCRH|UQCRQ|UQCR10	-0.39
GO Cellular Components	GO:1990072	TRAPPIII protein complex	-2.4	TRAPPC2|TRAPPC4|TRAPPC13	-0.39
GO Cellular Components	GO:1990071	TRAPPII protein complex	-2.4	TRAPPC2|TRAPPC4|TRAPPC13	-0.39
GO Cellular Components	GO:0034709	methylosome	-2.4	SNRPD2|SNRPF|SNRPG	-0.39
GO Cellular Components	GO:0120114	Sm-like protein family complex	-2.3	SNRNP70|SNRPA1|SNRPD2|SNRPF|SNRPG|LSM3|LSM7	-0.37
GO Cellular Components	GO:0031970	organelle envelope lumen	-2.3	NDUFA8|NDUFS5|COX17|HTRA2|TRIAP1|CYCS|UQCC2|COA6	-0.35
GO Cellular Components	GO:0031300	intrinsic component of organelle membrane	-2.3	SLC25A3|PEX3|PEX11B|TIMM17A|MTX2|EBP|UNC50|SLC35B3|DERL2|IER3IP1|COX16|HACD3|TMEM70|SLC35A5|MGARP|SMDT1|SFXN2|MICOS13|MTX3|MICOS10|PET100	-0.31
GO Cellular Components	GO:0098554	cytoplasmic side of endoplasmic reticulum membrane	-2.2	RPL27|RPS28|RPS29	-0.29
GO Cellular Components	GO:0008180	COP9 signalosome	-2.2	COPS5|COPS4|COPS9	-0.29
GO Cellular Components	GO:0031314	extrinsic component of mitochondrial inner membrane	-2.2	NDUFAF5|ATP23|TAMM41	-0.29
GO Cellular Components	GO:0031968	organelle outer membrane	-2.2	ATP5MC3|RPS27A|UBC|VDAC2|MTX2|TOMM7|CISD1|CYB5B|HINT2|MGARP|RTN4IP1|MICOS13|MTX3|MICOS10	-0.28
GO Cellular Components	GO:1905368	peptidase complex	-2.2	PSMA2|PSMB3|PSMB4|PSMB7|PSMC2|PSMC6|PSMD8|SPCS2|HTRA2	-0.28
GO Cellular Components	GO:0019867	outer membrane	-2.2	ATP5MC3|RPS27A|UBC|VDAC2|MTX2|TOMM7|CISD1|CYB5B|HINT2|MGARP|RTN4IP1|MICOS13|MTX3|MICOS10	-0.26
GO Cellular Components	GO:0032045	guanyl-nucleotide exchange factor complex	-2.1	LAMTOR5|WDR41|LAMTOR4	-0.2
GO Cellular Components	GO:0034719	SMN-Sm protein complex	-2	SNRPD2|SNRPF|SNRPG	-0.12
GO Cellular Components	GO:0005682	U5 snRNP	-2	SNRPD2|SNRPF|SNRPG	-0.12
GO Molecular Functions	GO:0003735	structural constituent of ribosome	-45	NDUFA7|RPL7|RPL9|RPL10|RPL11|RPL17|RPL18|RPL23A|MRPL23|RPL24|RPL27|RPL30|RPL27A|RPL29|RPL31|RPL32|RPL34|RPL35A|RPL37|RPL37A|RPL38|RPL39|RPS3|RPS8|RPS12|RPS13|RPS17|RPS19|RPS20|RPS21|RPS23|RPS24|RPS27|RPS27A|RPS28|RPS29|RPL23|MRPL33|MRPL19|MRPL3|MRPL42|MRPL13|MRPL18|MRPS18C|MRPL2|MRPL51|MRPS23|MRPS14|MRPL14|MRPL36|MRPL11|MRPL9|MRPL43|MRPL52|RPL22L1	-41
GO Molecular Functions	GO:0009055	electron transfer activity	-21	ADH5|ALDH2|COX6B1|COX7A1|COX7A2P2|COX7B|COX15|ETFA|FDX1|COX3|NDUFA1|NDUFA2|NDUFA3|NDUFA7|NDUFA8|NDUFA9|NDUFB4|NDUFB5|NDUFB8|NDUFC2|NDUFS4|NDUFS5|SDHD|UQCRH|COX7A2L|COX5A|UQCR10|GLRX2|CYCS|NDUFA12|FDX2	-18
GO Molecular Functions	GO:0005198	structural molecule activity	-17	MYL6|NDUFA7|RPL7|RPL9|RPL10|RPL11|RPL17|RPL18|RPL23A|MRPL23|RPL24|RPL27|RPL30|RPL27A|RPL29|RPL31|RPL32|RPL34|RPL35A|RPL37|RPL37A|RPL38|RPL39|RPS3|RPS8|RPS12|RPS13|RPS17|RPS19|RPS20|RPS21|RPS23|RPS24|RPS27|RPS27A|RPS28|RPS29|RPL23|MRPL33|MRPL19|MRPL3|SEC31B|MRPL42|MRPL13|MRPL18|MRPS18C|MRPL2|MRPL51|MRPS23|MRPS14|MRPL14|MRPL36|MRPL11|MRPL9|VPS25|MRPL43|MRPL52|MYL6B|RPL22L1	-15
GO Molecular Functions	GO:0015453	oxidoreduction-driven active transmembrane transporter activity	-17	COX6B1|COX7A1|COX7B|COX15|COX3|NDUFA1|NDUFA2|NDUFA3|NDUFA7|NDUFA8|NDUFA9|NDUFB4|NDUFB5|NDUFB8|NDUFC2|NDUFS4|NDUFS5|UQCRH|COX7A2L|COX5A|UQCR10|NDUFA12	-15
GO Molecular Functions	GO:0015399	primary active transmembrane transporter activity	-11	COX6B1|COX7A1|COX7B|COX15|COX3|NDUFA1|NDUFA2|NDUFA3|NDUFA7|NDUFA8|NDUFA9|NDUFB4|NDUFB5|NDUFB8|NDUFC2|NDUFS4|NDUFS5|UQCRH|COX7A2L|COX5A|ABCA7|UQCR10|ATP6V1H|NDUFA12|ABCC10	-8.9
GO Molecular Functions	GO:0008137	NADH dehydrogenase (ubiquinone) activity	-10	NDUFA1|NDUFA2|NDUFA3|NDUFA7|NDUFA8|NDUFA9|NDUFB4|NDUFB5|NDUFB8|NDUFC2|NDUFS4|NDUFS5|NDUFA12	-8
GO Molecular Functions	GO:0050136	NADH dehydrogenase (quinone) activity	-10	NDUFA1|NDUFA2|NDUFA3|NDUFA7|NDUFA8|NDUFA9|NDUFB4|NDUFB5|NDUFB8|NDUFC2|NDUFS4|NDUFS5|NDUFA12	-7.9
GO Molecular Functions	GO:0015078	proton transmembrane transporter activity	-10	ATP5F1A|ATP5F1E|ATP5MC1|ATP5MC3|ATP5ME|ATP5PO|COX6B1|COX7A1|COX7B|COX15|COX3|SLC25A3|UQCRH|COX7A2L|COX5A|ATP5MF|ATP5PD|ATP5MG|UQCR10|ATP6V1H	-7.6
GO Molecular Functions	GO:0003954	NADH dehydrogenase activity	-9.9	NDUFA1|NDUFA2|NDUFA3|NDUFA7|NDUFA8|NDUFA9|NDUFB4|NDUFB5|NDUFB8|NDUFC2|NDUFS4|NDUFS5|NDUFA12	-7.6
GO Molecular Functions	GO:0016491	oxidoreductase activity	-9.9	ADH5|ALDH2|COX6B1|COX7A1|COX7A2P2|COX7B|COX15|CYP51A1|ETFA|FDX1|HBB|LDHB|MGST3|COX3|NDUFA1|NDUFA2|NDUFA3|NDUFA7|NDUFA8|NDUFA9|NDUFB4|NDUFB5|NDUFB8|NDUFC2|NDUFS4|NDUFS5|PHYH|SDHD|TXN|UQCRH|HSD17B8|COX7A2L|COX5A|SELENOF|GSTO1|PRDX4|PRDX5|UQCR10|GLRX2|CYCS|NDUFA12|BDH2|SDR39U1|NDUFAF5|CYB5B|PCBD2|RTN4IP1|TXNDC17|FDX2|D2HGDH	-7.5
GO Molecular Functions	GO:0003955	NAD(P)H dehydrogenase (quinone) activity	-9.8	NDUFA1|NDUFA2|NDUFA3|NDUFA7|NDUFA8|NDUFA9|NDUFB4|NDUFB5|NDUFB8|NDUFC2|NDUFS4|NDUFS5|NDUFA12	-7.4
GO Molecular Functions	GO:0016655	oxidoreductase activity, acting on NAD(P)H, quinone or similar compound as acceptor	-8.8	NDUFA1|NDUFA2|NDUFA3|NDUFA7|NDUFA8|NDUFA9|NDUFB4|NDUFB5|NDUFB8|NDUFC2|NDUFS4|NDUFS5|NDUFA12	-6.5
GO Molecular Functions	GO:0016651	oxidoreductase activity, acting on NAD(P)H	-7.4	COX15|NDUFA1|NDUFA2|NDUFA3|NDUFA7|NDUFA8|NDUFA9|NDUFB4|NDUFB5|NDUFB8|NDUFC2|NDUFS4|NDUFS5|NDUFA12	-5.1
GO Molecular Functions	GO:0046933	proton-transporting ATP synthase activity, rotational mechanism	-6.8	ATP5F1A|ATP5F1E|ATP5ME|ATP5PO|ATP5MF|ATP5PD|ATP5MG	-4.5
GO Molecular Functions	GO:0004129	cytochrome-c oxidase activity	-6.3	COX6B1|COX7A1|COX7B|COX15|COX3|COX7A2L|COX5A	-4
GO Molecular Functions	GO:0016675	oxidoreductase activity, acting on a heme group of donors	-6.1	COX6B1|COX7A1|COX7B|COX15|COX3|COX7A2L|COX5A	-3.9
GO Molecular Functions	GO:0015252	proton channel activity	-5.8	ATP5F1A|ATP5F1E|ATP5ME|ATP5PO|ATP5MF|ATP5PD|ATP5MG	-3.5
GO Molecular Functions	GO:0019843	rRNA binding	-5.7	CIRBP|RPL9|RPL11|RPL23A|RPL37|RPS3|RPS13|RPL23|MRPL18|MRPS18C|MRPL11	-3.4
GO Molecular Functions	GO:0022804	active transmembrane transporter activity	-4.7	COX6B1|COX7A1|COX7B|COX15|COX3|NDUFA1|NDUFA2|NDUFA3|NDUFA7|NDUFA8|NDUFA9|NDUFB4|NDUFB5|NDUFB8|NDUFC2|NDUFS4|NDUFS5|SLC25A3|SLC22A5|UQCRH|COX7A2L|COX5A|ABCA7|UQCR10|ATP6V1H|NDUFA12|ABCC10	-2.5
GO Molecular Functions	GO:1990948	ubiquitin ligase inhibitor activity	-4.2	RPL11|RPL37|RPS20|RPL23	-2
GO Molecular Functions	GO:0070181	small ribosomal subunit rRNA binding	-3.9	CIRBP|RPS3|RPS13|MRPS18C	-1.8
GO Molecular Functions	GO:0055105	ubiquitin-protein transferase inhibitor activity	-3.9	RPL11|RPL37|RPS20|RPL23	-1.8
GO Molecular Functions	GO:0031386	protein tag	-3.7	NEDD8|RPS27A|UBC|SUMO1	-1.6
GO Molecular Functions	GO:0051537	2 iron, 2 sulfur cluster binding	-3.6	FDX1|GLRX2|CISD1|FDX2|RFESD	-1.4
GO Molecular Functions	GO:0004601	peroxidase activity	-3.3	HBB|MGST3|SELENOF|PRDX4|PRDX5|TXNDC17	-1.1
GO Molecular Functions	GO:0008379	thioredoxin peroxidase activity	-3.2	SELENOF|PRDX4|PRDX5	-1.1
GO Molecular Functions	GO:0016209	antioxidant activity	-3.2	HBB|MGST3|TXN|SELENOF|GSTO1|PRDX4|PRDX5|TXNDC17	-1.1
GO Molecular Functions	GO:0051920	peroxiredoxin activity	-3	SELENOF|PRDX4|PRDX5	-0.91
GO Molecular Functions	GO:0016684	oxidoreductase activity, acting on peroxide as acceptor	-3	HBB|MGST3|SELENOF|PRDX4|PRDX5|TXNDC17	-0.91
GO Molecular Functions	GO:0051082	unfolded protein binding	-2.5	HSPD1|NACA|PFDN1|PPIA|VBP1|PFDN6|HTRA2|TMEM67|PET100	-0.48
GO Molecular Functions	GO:0055106	ubiquitin-protein transferase regulator activity	-2.5	RPL11|RPL37|RPS20|RPL23	-0.48
GO Molecular Functions	GO:0004298	threonine-type endopeptidase activity	-2.4	PSMB3|PSMB4|PSMB7	-0.39
GO Molecular Functions	GO:0022884	macromolecule transmembrane transporter activity	-2.2	TIMM17A|SEC61G|TOMM7|HNRNPA3	-0.24
GO Molecular Functions	GO:0051536	iron-sulfur cluster binding	-2.1	FDX1|RPS3|GLRX2|CISD1|FDX2|RFESD	-0.13
GO Molecular Functions	GO:0051540	metal cluster binding	-2.1	FDX1|RPS3|GLRX2|CISD1|FDX2|RFESD	-0.13
KEGG Pathway	hsa03010	Ribosome	-41	RPL7|RPL9|RPL10|RPL11|RPL17|RPL18|RPL23A|MRPL23|RPL24|RPL27|RPL30|RPL27A|RPL29|RPL31|RPL32|RPL34|RPL35A|RPL37|RPL37A|RPL38|RPL39|RPS3|RPS8|RPS12|RPS13|RPS17|RPS19|RPS20|RPS21|RPS23|RPS24|RPS27|RPS27A|RPS28|RPS29|RPL23|MRPL33|MRPL19|MRPL3|MRPL13|MRPL18|MRPS18C|MRPL2|MRPS14|MRPL14|MRPL36|MRPL11|MRPL9|RPL22L1	-39
KEGG Pathway	hsa00190	Oxidative phosphorylation	-29	ATP5F1A|ATP5F1E|ATP5MC1|ATP5MC3|ATP5ME|ATP5PO|COX6B1|COX6C|COX7A1|COX7B|COX15|COX3|NDUFA1|NDUFA2|NDUFA3|NDUFA7|NDUFA8|NDUFA9|NDUFB4|NDUFB5|NDUFB8|NDUFC2|NDUFS4|NDUFS5|SDHD|UQCRH|COX7A2L|COX5A|ATP5MF|COX17|ATP5PD|ATP5MG|UQCRQ|UQCR10|NDUFA13|ATP6V1H|CYCS|NDUFB11|NDUFA12	-27
KEGG Pathway	hsa05012	Parkinson disease	-23	ATP5F1A|ATP5F1E|ATP5MC1|ATP5MC3|ATP5PO|COX6B1|COX6C|COX7A1|COX7B|COX3|NDUFA1|NDUFA2|NDUFA3|NDUFA7|NDUFA8|NDUFA9|NDUFB4|NDUFB5|NDUFB8|NDUFC2|NDUFS4|NDUFS5|PSMA2|PSMB3|PSMB4|PSMB7|PSMC2|PSMC6|PSMD8|RPS27A|SDHD|TXN|UBC|UQCRH|VDAC2|SEM1|COX7A2L|COX5A|ATP5PD|UQCRQ|HTRA2|UQCR10|NDUFA13|CYCS|NDUFB11|NDUFA12	-21
KEGG Pathway	hsa04714	Thermogenesis	-23	ATP5F1A|ATP5F1E|ATP5MC1|ATP5MC3|ATP5ME|ATP5PO|COX6B1|COX6C|COX7A1|COX7B|COX15|COX3|NDUFA1|NDUFA2|NDUFA3|NDUFA7|NDUFA8|NDUFA9|NDUFB4|NDUFB5|NDUFB8|NDUFC2|NDUFS4|NDUFS5|SDHD|UQCRH|COX7A2L|COX5A|ATP5MF|COX17|ATP5PD|ATP5MG|UQCRQ|UQCR10|NDUFA13|COX16|NDUFB11|NDUFA12|NDUFAF5|COX14|NDUFAF2|COA6|COA5	-21
KEGG Pathway	hsa05020	Prion disease	-19	ATP5F1A|ATP5F1E|ATP5MC1|ATP5MC3|ATP5PO|COX6B1|COX6C|COX7A1|COX7B|COX3|NDUFA1|NDUFA2|NDUFA3|NDUFA7|NDUFA8|NDUFA9|NDUFB4|NDUFB5|NDUFB8|NDUFC2|NDUFS4|NDUFS5|PSMA2|PSMB3|PSMB4|PSMB7|PSMC2|PSMC6|PSMD8|SDHD|UQCRH|VDAC2|SEM1|COX7A2L|COX5A|ATP5PD|UQCRQ|UQCR10|NDUFA13|CYCS|NDUFB11|NDUFA12	-18
KEGG Pathway	hsa05014	Amyotrophic lateral sclerosis	-19	ATP5F1A|ATP5F1E|ATP5MC1|ATP5MC3|ATP5PO|COX6B1|COX6C|COX7A1|COX7B|HNRNPA1|HNRNPA2B1|COX3|NDUFA1|NDUFA2|NDUFA3|NDUFA7|NDUFA8|NDUFA9|NDUFB4|NDUFB5|NDUFB8|NDUFC2|NDUFS4|NDUFS5|PSMA2|PSMB3|PSMB4|PSMB7|PSMC2|PSMC6|PSMD8|SDHD|UQCRH|SEM1|COX7A2L|COX5A|ATP5PD|TARDBP|UQCRQ|UQCR10|NDUFA13|CYCS|NDUFB11|WDR41|NDUFA12|MAP1LC3B|HNRNPA3	-17
KEGG Pathway	hsa05016	Huntington disease	-18	ATP5F1A|ATP5F1E|ATP5MC1|ATP5MC3|ATP5PO|COX6B1|COX6C|COX7A1|COX7B|COX3|NDUFA1|NDUFA2|NDUFA3|NDUFA7|NDUFA8|NDUFA9|NDUFB4|NDUFB5|NDUFB8|NDUFC2|NDUFS4|NDUFS5|POLR2F|PSMA2|PSMB3|PSMB4|PSMB7|PSMC2|PSMC6|PSMD8|SDHD|UQCRH|VDAC2|SEM1|COX7A2L|COX5A|ATP5PD|UQCRQ|UQCR10|NDUFA13|CYCS|NDUFB11|NDUFA12	-17
KEGG Pathway	hsa05208	Chemical carcinogenesis - reactive oxygen species	-18	ATP5F1A|ATP5F1E|ATP5MC1|ATP5MC3|ATP5PO|COX6B1|COX6C|COX7A1|COX7B|GSTA4|GSTM3|MGST3|COX3|NDUFA1|NDUFA2|NDUFA3|NDUFA7|NDUFA8|NDUFA9|NDUFB4|NDUFB5|NDUFB8|NDUFC2|NDUFS4|NDUFS5|SDHD|UQCRH|VDAC2|COX7A2L|COX5A|GSTO1|ATP5PD|UQCRQ|UQCR10|NDUFA13|NDUFB11|NDUFA12	-17
KEGG Pathway	hsa05171	Coronavirus disease - COVID-19	-18	RPL7|RPL9|RPL10|RPL11|RPL17|RPL18|RPL23A|RPL24|RPL27|RPL30|RPL27A|RPL29|RPL31|RPL32|RPL34|RPL35A|RPL37|RPL37A|RPL38|RPL39|RPS3|RPS8|RPS12|RPS13|RPS17|RPS19|RPS20|RPS21|RPS23|RPS24|RPS27|RPS27A|RPS28|RPS29|RPL23|RPL22L1	-16
KEGG Pathway	hsa05415	Diabetic cardiomyopathy	-16	ATP5F1A|ATP5F1E|ATP5MC1|ATP5MC3|ATP5PO|COX6B1|COX6C|COX7A1|COX7B|COX3|NDUFA1|NDUFA2|NDUFA3|NDUFA7|NDUFA8|NDUFA9|NDUFB4|NDUFB5|NDUFB8|NDUFC2|NDUFS4|NDUFS5|PTPA|SDHD|UQCRH|VDAC2|COX7A2L|COX5A|ATP5PD|UQCRQ|UQCR10|NDUFA13|NDUFB11|NDUFA12	-15
KEGG Pathway	hsa05010	Alzheimer disease	-15	ATP5F1A|ATP5F1E|ATP5MC1|ATP5MC3|ATP5PO|COX6B1|COX6C|COX7A1|COX7B|COX3|NDUFA1|NDUFA2|NDUFA3|NDUFA7|NDUFA8|NDUFA9|NDUFB4|NDUFB5|NDUFB8|NDUFC2|NDUFS4|NDUFS5|PSMA2|PSMB3|PSMB4|PSMB7|PSMC2|PSMC6|PSMD8|SDHD|UQCRH|VDAC2|SEM1|NAE1|COX7A2L|COX5A|RTN3|ATP5PD|UQCRQ|UQCR10|NDUFA13|CYCS|NDUFB11|NDUFA12	-14
KEGG Pathway	hsa05022	Pathways of neurodegeneration - multiple diseases	-14	ATP5F1A|ATP5F1E|ATP5MC1|ATP5MC3|ATP5PO|COX6B1|COX6C|COX7A1|COX7B|COX3|NDUFA1|NDUFA2|NDUFA3|NDUFA7|NDUFA8|NDUFA9|NDUFB4|NDUFB5|NDUFB8|NDUFC2|NDUFS4|NDUFS5|PSMA2|PSMB3|PSMB4|PSMB7|PSMC2|PSMC6|PSMD8|RPS27A|SDHD|UBC|UQCRH|VDAC2|SEM1|COX7A2L|COX5A|ATP5PD|TARDBP|UQCRQ|HTRA2|UQCR10|NDUFA13|CYCS|NDUFB11|WDR41|NDUFA12|MAP1LC3B	-13
KEGG Pathway	hsa04932	Non-alcoholic fatty liver disease	-14	COX6B1|COX6C|COX7A1|COX7B|COX3|NDUFA1|NDUFA2|NDUFA3|NDUFA7|NDUFA8|NDUFA9|NDUFB4|NDUFB5|NDUFB8|NDUFC2|NDUFS4|NDUFS5|SDHD|UQCRH|COX7A2L|COX5A|UQCRQ|UQCR10|NDUFA13|CYCS|NDUFB11|NDUFA12	-13
KEGG Pathway	hsa04723	Retrograde endocannabinoid signaling	-4.6	NDUFA1|NDUFA2|NDUFA3|NDUFA7|NDUFA8|NDUFA9|NDUFB4|NDUFB5|NDUFB8|NDUFC2|NDUFS4|NDUFS5|NDUFA13|NDUFB11|NDUFA12	-3.2
KEGG Pathway	hsa03050	Proteasome	-4.4	PSMA2|PSMB3|PSMB4|PSMB7|PSMC2|PSMC6|PSMD8|SEM1	-3
KEGG Pathway	hsa03040	Spliceosome	-4.2	HNRNPA1|SRSF6|SNRNP70|SNRPA1|SNRPD2|SNRPF|SNRPG|LSM3|TRA2A|LSM7|MAGOHB|CCDC12|HNRNPA3	-2.8
KEGG Pathway	hsa04260	Cardiac muscle contraction	-3.8	COX6B1|COX6C|COX7A1|COX7B|COX3|UQCRH|COX7A2L|COX5A|UQCRQ|UQCR10	-2.5
KEGG Pathway	hsa00982	Drug metabolism - cytochrome P450	-2.6	ADH5|GSTA4|GSTM3|MGST3|GSTO1	-1.3
KEGG Pathway	hsa00983	Drug metabolism - other enzymes	-2.5	GSTA4|GSTM3|ITPA|MGST3|GSTO1|NME7	-1.2
KEGG Pathway	hsa00980	Metabolism of xenobiotics by cytochrome P450	-2.4	ADH5|GSTA4|GSTM3|MGST3|GSTO1	-1.1
KEGG Pathway	hsa03060	Protein export	-2.3	SPCS2|SEC61B|SEC61G|IMMP1L	-1.1
