# Supplementary material for: Sex differences in gene expression and alternative splicing in the Chinese horseshoe bat
Source: PeerJ. 2023 Apr 24;11:e15231. doi: 10.7717/peerj.15231 (PMC10135408; doi:10.7717/peerj.15231)
Supplement: Table S7 [file peerj-11-15231-s007.xlsx]

## Sheet: Brain
Type	GeneID	FDR	IncLevelDifference
A3SS	TAF1B	0.00365786	0.168
A3SS	ZNF513	0.0445853	0.204
A3SS	MPEG1	0.00150423	-0.134
A3SS	SBF2	0.0201855	-0.219
A3SS	JAM2	0.0359953	0.184
A3SS	CLCN2	0.0129298	-0.178
A3SS	DELE1	0.000940342	0.272
A3SS	DDX46	0.0323976	-0.128
A3SS	GDAP1L1	0.00687851	-0.119
A3SS	RBBP5	0.0145912	-0.127
A3SS	ILK	0.000126073	0.135
A3SS	REX1BD	1.2115e-05	-0.354
A3SS	SRRM2	0.000398527	-0.237
A3SS	SRRM2	9.84139e-09	-0.174
A3SS	SRRM2	3.93709e-08	-0.184
A3SS	AGAP3	0.00017103	-0.179
A3SS	MC1R	0.00295398	-0.592
A3SS	PDILT	0.0475947	-0.475
A3SS	GIGYF1	0.00542559	0.21
A3SS	ACTN4	0.0143869	-0.177
A3SS	RHBDD3	0.0131404	-0.301
A3SS	IFI27L1	0.000125348	-0.244
A3SS	IFI27L1	1.40469e-05	-0.606
A3SS	ATG2B	0.0259883	0.102
A3SS	VSIG8	0.00254671	0.384
A3SS	VSIG8	0.000542695	0.329
A3SS	OSBPL2	0.000487137	0.176
A3SS	FRMPD1	0.0250552	-0.156
A3SS	MAP4	6.54684e-08	0.143
A3SS	ZBED6	0.000868852	0.253
A3SS	PHC1	0.00256336	0.231
A3SS	COBLL1	2.80126e-05	0.489
A3SS	NKTR	0.0248831	-0.338
A3SS	MED1	0.0101362	-0.222
A3SS	CREG1	0.0078581	0.205
A3SS	HIPK2	0.000169484	0.109
A3SS	ARFRP1	0.00844819	-0.371
A3SS	TFAP4	0.00232363	-0.505
A3SS	TFAP4	0.0311871	-0.424
A3SS	TFAP4	0.0285367	-0.441
A3SS	GPR155	0.0390038	0.136
A3SS	ZNF33A	0.0472198	-0.349
A3SS	CA11	0.00015022	0.134
A3SS	EPB41L3	0.0498221	-0.193
A3SS	MBD1	0.0203094	0.284
A3SS	MBD1	0.00332062	-0.316
A3SS	PTGES2	0.00343487	-0.137
A3SS	WRAP53	2.62322e-05	0.188
A3SS	HCFC1	0.00136702	-0.171
A3SS	LSM14A	0.000267458	-0.116
A3SS	CCNL1	0.00730109	-0.167
A3SS	COASY	0.0429964	0.198
A3SS	AZIN2	0.0487626	-0.188
A3SS	DEDD2	0.0369853	0.146
A3SS	INTS8	0.0493512	0.142
A3SS	NUDT14	0.00266914	-0.155
A3SS	STX16	3.9675e-06	-0.144
A3SS	HNRNPDL	0.00381257	0.115
A3SS	ZSCAN4	0.0145578	-0.285
A3SS	PEG3	0.000156031	-0.114
A3SS	PEG3	0.000394936	-0.119
A3SS	CASK	0.00121423	0.247
A3SS	WDR13	0.000500168	0.128
A3SS	WDR13	2.87222e-06	0.268
A3SS	RUFY2	0.0476893	-0.243
A3SS	RUFY2	0.00279085	-0.337
A3SS	FGF1	2.47404e-05	0.451
A3SS	PHF20L1	0.00377473	0.213
A3SS	PPP1R3F	0.00735344	-0.169
A3SS	FMR1	0.027605	0.189
A3SS	APBB3	0.0168507	-0.481
A3SS	STK19	0.031958	-0.106
A3SS	SLC10A3	0.0192011	0.146
A3SS	ACHE	0.0273769	0.24
A3SS	ACHE	0.00681489	-0.112
A3SS	PRDM8	0.0313319	-0.151
A3SS	CDPF1	0.0359953	0.26
A3SS	RCN3	0.0165513	0.123
A3SS	SHANK1	0.00636721	0.23
A3SS	CHD7	0.0294337	0.309
A3SS	CPSF4	0.00687851	-0.23
A3SS	NCOA6	0.00993311	-0.143
A3SS	PRR29	0.00287972	-0.225
A3SS	TP53INP2	0.0120521	-0.177
A3SS	KLK8	0.0311871	-0.279
A3SS	RBAK	0.0385422	0.278
A3SS	TAF9	0.00381257	0.193
A3SS	ZPBP	8.07066e-05	-0.509
A3SS	NUDT3	5.96839e-07	0.247
A3SS	RCOR3	0.0169676	-0.394
A3SS	SNRNP70	2.95904e-07	-0.237
A3SS	MSANTD2	0.0196572	-0.168
A3SS	MSANTD2	0.00366845	0.205
A3SS	MGAT5	0.0159721	-0.14
A3SS	SUPT20H	0.0233982	-0.155
A3SS	ECI2	0.0449046	-0.44
A3SS	CLK2	0.000713104	0.316
A3SS	PLAA	0.0130976	-0.135
A3SS	AARSD1	0.0201855	0.315
A3SS	TTC13	0.00103623	-0.268
A3SS	PSIP1	0.00440168	0.143
A3SS	GIMAP8	0.0207991	0.225
A3SS	TGFBR1	0.0439799	-0.198
A3SS	MMP24	2.96948e-05	-0.218
A3SS	UNC45B	0.0291466	-0.193
A3SS	RFC3	0.0166602	-0.121
A3SS	LSR	0.0185341	-0.454
A3SS	CXADR	0.0109502	-0.215
A3SS	UBAP2L	0.0412754	-0.15
A3SS	NCOA3	0.0182953	0.292
A3SS	SPHKAP	0.0177416	-0.136
A3SS	PRMT7	9.89162e-07	0.363
A3SS	SCLY	0.0287379	-0.134
A3SS	PCGF3	0.000750569	0.157
A3SS	TMEM175	0.0204414	-0.173
A3SS	CTBP1	0.010155	0.106
A3SS	HIF3A	5.95043e-05	-0.366
A3SS	FBXO7	0.00732773	-0.117
A3SS	RSRP1	0.0387709	0.155
A3SS	ADAM17	0.00504356	-0.148
A3SS	KIF22	0	0.148
A3SS	PRXL2A	0.00338309	0.249
A3SS	ENAH	0.00931615	0.231
A3SS	NBN	0.0179893	-0.283
A3SS	PHC3	0.00254671	-0.529
A3SS	KDM8	0.0176086	-0.103
A3SS	COG1	5.39092e-07	-0.104
A3SS	PODN	0.0466954	0.284
A3SS	NRXN2	0.00687851	-0.166
A3SS	CHKA	0.0341976	-0.142
A3SS	ZNRD2	1.48567e-06	0.126
A3SS	ZNF467	0.0236214	-0.148
A3SS	TUT1	0.0185702	0.141
A3SS	IL16	0.018986	-0.368
A3SS	STX3	0.00269925	-0.338
A3SS	CELF1	0.00420819	0.155
A3SS	HIPK1	0.0208089	0.133
A3SS	RBCK1	0.0288617	0.228
A3SS	LRRC40	0.026246	-0.14
A3SS	AMY2A	0.000122636	-0.225
A3SS	TRIT1	0.00125479	-0.14
A3SS	GYG2	0.0153634	0.5
A3SS	DNM1	6.2202e-07	0.135
A3SS	DNM1	1.2115e-05	0.121
A3SS	DNM1	0	0.289
A3SS	DNM1	0	0.287
A3SS	GOLGA5	0.0378218	0.18
A3SS	SRSF11	6.32694e-06	-0.2
A3SS	ERMARD	0.00365786	0.199
A3SS	NOLC1	0.00636721	0.107
A3SS	SGTA	0.00328043	-0.111
A3SS	SLC39A3	0.00291247	0.143
A3SS	HNRNPA1	0	0.136
A3SS	DLG5	0.0364921	0.157
A3SS	MTG1	0.000417623	-0.304
A3SS	KLC1	1.23035e-05	-0.116
A3SS	CAMTA1	0.00068203	0.134
A3SS	PCNP	0.00585835	0.101
A3SS	HERC1	0.00498746	0.221
A3SS	SLTM	0.0038391	-0.189
A3SS	SLTM	0.001929	-0.3
A3SS	ARHGEF40	0.0156291	-0.322
A3SS	POLR1H	0.0316187	0.102
A3SS	PPP4R3B	0.000522744	-0.148
A3SS	ERCC8	1.5209e-05	-0.193
A3SS	SLC45A2	0.00958068	0.252
A3SS	BAK1	0.0375806	-0.28
A3SS	GABBR1	2.6019e-05	-0.138
A3SS	TMEM18	0.00222301	0.197
A3SS	CYRIA	0.0424946	-0.282
A3SS	AHSA2	0.000558272	-0.158
A3SS	RALGDS	0.0401978	-0.145
A3SS	RALGDS	0.045415	-0.119
A3SS	PLD3	4.71216e-10	0.184
A3SS	PLD3	3.28253e-08	0.169
A3SS	PLD3	0.0184157	0.249
A3SS	PLD3	8.18933e-13	0.118
A3SS	PLD3	2.05453e-10	0.116
A3SS	PLD3	6.89371e-09	0.11
A3SS	VDAC1	0.00089954	-0.369
A3SS	CCT8	4.24342e-05	-0.36
A3SS	CCNT2	0.018061	0.254
A3SS	COX20	0.00130399	-0.627
A3SS	CIAO2B	0.0412754	-0.143
A3SS	MAPK3	0.0172845	0.522
A3SS	MAPK3	0.00118903	-0.582
A3SS	MFSD12	0.0110004	0.138
A3SS	HSD3B7	3.70647e-06	0.529
A3SS	HSD3B7	3.07639e-05	0.509
A3SS	NARS	0.0106467	0.125
A3SS	REX1BD	0.00730109	-0.408
A3SS	ABCA3	0.0117696	0.328
A3SS	LY6H	0.000604486	0.171
A3SS	HIGD1A	2.87222e-06	-0.359
A3SS	IFI27L1	0.000463862	-0.616
A3SS	ATP6V0B	0.0259883	-0.127
A3SS	MRPL4	0.0132989	-0.539
A3SS	GLUL	0.0038391	0.108
A3SS	GLUL	9.56767e-08	0.21
A3SS	TRIM46	5.03401e-07	0.113
A3SS	MINK1	6.73854e-05	0.177
A3SS	SEH1L	0.0379947	-0.117
A3SS	PUS3	0.0182781	-0.199
A3SS	TNK2	1.23035e-05	0.207
A3SS	ARL3	0.0273274	-0.273
A3SS	HSF4	0.0251304	0.179
A3SS	E2F4	0.0323976	0.529
A3SS	ERAL1	0.0106467	-0.278
A3SS	LDHD	0.0178651	-0.158
A3SS	NDRG2	1.83012e-05	-0.617
A3SS	NDRG2	1.73652e-05	-0.139
A3SS	NDRG2	4.28914e-06	-0.144
A3SS	NDRG2	2.87135e-06	-0.145
A3SS	NDRG2	0.0165256	-0.251
A3SS	NDRG2	0.0374658	-0.145
A3SS	AP1S2	2.39061e-09	-0.334
A3SS	AP1S2	0.0200726	-0.19
A3SS	DUS3L	0.00093934	-0.573
A3SS	MFSD11	0.000162237	-0.35
A3SS	ULK3	0.0466954	0.129
A3SS	SWI5	0.0373779	0.187
A3SS	SWI5	0.00730109	0.194
A3SS	CIC	0.00029208	-0.522
A3SS	NCKAP1	0.000371453	0.24
A3SS	PSAP	0.000985371	0.317
A3SS	DEDD2	0.00127693	0.305
A3SS	TNNT1	0.0184721	0.127
A3SS	NUDT14	0.000254014	-0.276
A3SS	CORO6	0.000341858	-0.191
A3SS	ZNF512B	8.36844e-08	0.267
A3SS	SPNS2	0.000288476	-0.261
A3SS	STX16	5.09616e-06	-0.119
A3SS	WDR13	0.00235781	0.146
A3SS	CANX	0.00327885	-0.405
A3SS	IFT20	0.0306714	0.221
A3SS	IFT20	0.00835931	0.225
A3SS	KMT5C	3.30306e-05	-0.476
A3SS	NACC2	0.0331679	0.49
A3SS	DCXR	0.00053755	0.124
A3SS	APBB3	0.0469567	0.354
A3SS	UBA52	0.0294337	0.143
A3SS	UBA52	0.00420819	0.117
A3SS	HNRNPA2B1	0.00285967	-0.157
A3SS	HNRNPA2B1	0.00241279	-0.133
A3SS	TCERG1	0.00585364	-0.424
A3SS	ZNF354C	0.00268531	0.142
A3SS	NIT1	0.0213026	-0.362
A3SS	NIT1	0.0286999	-0.325
A3SS	RAPGEFL1	4.18873e-06	-0.66
A3SS	RCN2	0.00640205	0.103
A3SS	IQGAP1	6.3739e-05	-0.415
A3SS	LY6E	0.0041553	0.412
A3SS	ACAA1	0.0244158	0.39
A3SS	SNRNP70	2.3308e-07	0.153
A3SS	HFE	0.0340981	-0.267
A3SS	KIAA0100	0.0456792	-0.104
A3SS	CNTN2	6.26821e-06	0.254
A3SS	PLD2	0.00126457	-0.118
A3SS	ATAT1	2.25713e-09	0.155
A3SS	MBD3	0.000490134	-0.333
A3SS	CAPN10	0.01447	-0.161
A3SS	SPARC	2.68609e-09	0.278
A3SS	COMMD3	0.0285367	-0.166
A3SS	AHSA1	0.0253572	-0.188
A3SS	NRBP2	0	-0.109
A3SS	NRBP2	0	-0.207
A3SS	GPT	0.0282283	0.315
A3SS	FASTK	0.0304961	-0.186
A3SS	PIP5K1A	0.0124039	-0.408
A3SS	MRPL54	4.97547e-07	-0.28
A3SS	KLC2	0.014537	0.172
A3SS	DPY19L4	0.00457426	0.106
A3SS	PAN2	0.0277929	0.144
A3SS	LRRC8A	0.00297653	-0.23
A3SS	CNPY2	0.0279078	-0.281
A3SS	CNPY2	0.0463009	-0.122
A3SS	CNPY2	0.0427559	-0.26
A3SS	CNPY2	0.0203094	-0.268
A3SS	RGL2	0.0489237	0.442
A3SS	PLEKHA5	0.00585835	0.19
A3SS	PLEKHA5	0.000851181	0.529
A3SS	NRXN2	0.0287379	-0.274
A3SS	ATN1	0.0090273	-0.325
A3SS	RPS6KB2	0.00114116	-0.29
A3SS	ARHGAP33	0.0311871	-0.211
A3SS	ABCA7	0.00840575	-0.385
A3SS	ABCA7	0.012393	-0.37
A3SS	ABCA7	0.00938582	-0.399
A3SS	CD81	1.83012e-05	-0.577
A3SS	CD81	0.0311871	-0.419
A3SS	TSSC4	0.00844819	0.471
A3SS	PITPNM1	0.0464961	0.16
A3SS	ANKRD13D	2.0671e-05	-0.109
A3SS	ANKRD13D	0.0187575	-0.403
A3SS	AKAP8L	0.000114109	0.313
A3SS	TRIM3	0.0315953	-0.405
A3SS	ATF6B	9.9853e-05	-0.129
A3SS	POLR2E	4.01782e-05	-0.142
A3SS	SNRPN	0.0294329	0.102
A3SS	LZIC	0.0106786	0.168
A3SS	RNPS1	0.0218642	0.298
A3SS	RNPS1	0.00931615	0.315
A3SS	RNPS1	0.0131526	0.306
A3SS	RNPS1	0.00829151	-0.11
A3SS	NADK	0.0392363	-0.526
A3SS	AJM1	0.007774	-0.163
A3SS	VCP	0.00232353	-0.324
A3SS	IZUMO4	0.019542	-0.245
A3SS	ERMARD	0.00108441	0.2
A3SS	NOLC1	0.000190513	0.106
A3SS	TIRAP	0.0333024	0.224
A3SS	BMP1	0.000798125	-0.459
A3SS	SLC8A3	0.0121502	0.135
A3SS	STXBP1	5.52631e-08	0.397
A3SS	PTPRS	0.000798292	-0.143
A3SS	MIER2	1.84459e-05	0.558
A3SS	TMEM259	0.0101256	-0.116
A3SS	PPP3CB	0.0229801	-0.468
A3SS	SEPTIN5	0.00851347	-0.357
A3SS	MTA1	5.95043e-05	0.343
A3SS	CALY	0.000985371	-0.24
A3SS	CEP170B	0.0404136	-0.122
A3SS	CEP170B	0.0376758	-0.13
A3SS	AP1G2	0.0061885	-0.216
A3SS	MTSS2	0.00477389	-0.439
A3SS	MTSS2	0.00464814	-0.437
A3SS	MTSS2	0.0124889	-0.403
A3SS	TNPO1	0.000635646	0.254
A3SS	MYO9B	0.0159794	-0.322
A3SS	CLIP3	0.00180719	-0.285
A3SS	RIMS1	0.00329332	0.618
A3SS	RIMS1	5.99684e-09	-0.156
A3SS	FANCE	0.0359953	-0.172
A3SS	EHMT2	0.00232087	0.5
A3SS	VWA7	0.0323222	-0.298
A3SS	BHLHB9	8.18933e-13	-0.554
A5SS	LDAH	0.00343263	-0.206
A5SS	UGP2	0.0266341	-0.149
A5SS	FBXO41	0.00554224	0.276
A5SS	PRPF38B	0.00709354	-0.137
A5SS	SPICE1	0.0422138	0.276
A5SS	SF3B1	0.0039623	-0.112
A5SS	ACAD9	0.010064	-0.143
A5SS	PGGT1B	0.00108537	0.223
A5SS	CLCN2	0.0059457	-0.131
A5SS	SDF4	0.00494004	-0.341
A5SS	NR4A2	0.00677442	0.181
A5SS	FAXDC2	0.000104382	0.188
A5SS	STAMBP	0.0393929	0.142
A5SS	JADE2	0.0127354	-0.284
A5SS	AVPI1	0.000943882	0.167
A5SS	MRAS	0.0204852	-0.194
A5SS	GDAP1L1	0.0115844	-0.541
A5SS	PHC2	0.00194564	0.357
A5SS	LASP1	0.0139536	-0.13
A5SS	ARMC5	0.00892555	0.278
A5SS	ARMC5	0.0471162	0.112
A5SS	CLCC1	0.00957936	-0.129
A5SS	USP31	0.00440027	0.382
A5SS	FBRSL1	0.033945	-0.33
A5SS	RPH3A	4.28649e-05	0.238
A5SS	CIT	1.98455e-08	-0.137
A5SS	POP5	0.00216943	0.118
A5SS	PXN	0.0214512	-0.337
A5SS	RAB36	8.44907e-05	0.182
A5SS	MAPK8IP3	0.00953055	-0.15
A5SS	HYLS1	0.00530355	0.115
A5SS	AMPD2	1.37899e-05	-0.344
A5SS	FAM20B	0.016515	0.19
A5SS	FRMPD1	0.0224147	0.15
A5SS	FRMPD1	0.0402552	0.324
A5SS	HUWE1	0.0303514	0.147
A5SS	ANK3	0.0463954	0.129
A5SS	CYCS	9.03319e-12	0.107
A5SS	RBM11	0.026943	0.245
A5SS	SH2B1	0.00158615	-0.249
A5SS	SH2B1	0.00546798	0.374
A5SS	DMTF1	0.0100595	0.144
A5SS	PUS7	0.0289791	0.33
A5SS	RUVBL1	4.17112e-05	-0.126
A5SS	FAM162A	9.86752e-06	-0.413
A5SS	RPUSD4	0.0497045	-0.324
A5SS	RPUSD4	0.002897	-0.196
A5SS	RPUSD4	0.00537497	-0.183
A5SS	EIF3C	0.0134592	-0.135
A5SS	SPRING	0.0279962	0.12
A5SS	WDR27	0.04293	-0.277
A5SS	ZNF34	0.0036908	-0.382
A5SS	SLC35B3	0.034646	-0.173
A5SS	PLP1	0	-0.29
A5SS	PSME3IP1	0.0183952	-0.158
A5SS	ZNF23	0.0430352	0.234
A5SS	ACAP2	0.000311928	-0.345
A5SS	ZNF484	0.00220242	0.448
A5SS	NDRG2	0.0042363	-0.278
A5SS	NDRG2	0.0083891	-0.192
A5SS	NDRG2	0.00792058	-0.192
A5SS	ARRDC2	0.00473538	0.308
A5SS	FAM3C	0.000108925	-0.207
A5SS	NTAQ1	0.00782543	0.206
A5SS	RPL38	0.0179987	-0.102
A5SS	ITPKC	0.00244595	0.243
A5SS	KLHL32	5.12688e-05	0.193
A5SS	CUL1	0.00824014	-0.331
A5SS	RBBP8	0.0342267	0.295
A5SS	PAIP1	8.15075e-06	-0.309
A5SS	PIAS4	0.00968191	-0.233
A5SS	FAM98C	0.000113089	-0.241
A5SS	MPPE1	0.0276186	-0.178
A5SS	CTU2	0.0205672	-0.148
A5SS	ZNF706	0.0139932	0.144
A5SS	BEAN1	6.64408e-07	-0.618
A5SS	TRA2A	1.26329e-09	-0.347
A5SS	PANK2	9.91888e-07	-0.36
A5SS	RUFY2	0.00840398	0.14
A5SS	UBA1	0.0333758	-0.411
A5SS	LGALS8	0.000524672	0.165
A5SS	EXOC1	0.00379373	0.154
A5SS	MTRF1L	0.00229942	-0.107
A5SS	POLR2I	0.0443172	0.281
A5SS	KLHDC4	0.0108755	0.106
A5SS	ARL6IP4	0.00473538	-0.247
A5SS	ACHE	0.00633863	0.267
A5SS	OSBPL1A	0.000751862	-0.12
A5SS	HNRNPA2B1	0.00240827	0.193
A5SS	HNRNPA2B1	5.68472e-06	0.195
A5SS	HNRNPA2B1	0.00259362	0.144
A5SS	SLC27A5	0.0243807	-0.317
A5SS	RBM15	0.000127606	0.54
A5SS	SLC6A6	3.07101e-05	0.107
A5SS	ZMYM5	0.00380426	0.278
A5SS	PIP4P1	5.49267e-08	-0.245
A5SS	TLE3	0.0134592	-0.258
A5SS	NIT1	3.77674e-08	-0.213
A5SS	NIT1	1.43211e-11	-0.413
A5SS	NIT1	0	-0.496
A5SS	NIT1	0	-0.533
A5SS	RBM12	0.00696088	0.295
A5SS	DPH1	0.000658263	-0.158
A5SS	ACSF3	0.00365291	0.214
A5SS	KAT6A	0.00824014	-0.133
A5SS	WDR93	0.000817111	-0.472
A5SS	ACSBG1	1.94028e-12	0.21
A5SS	GPAT3	0.0369617	-0.435
A5SS	ZMYM3	3.38962e-05	-0.137
A5SS	ALS2	0.0415171	-0.29
A5SS	ALS2	0.000936459	0.317
A5SS	ALS2	8.04545e-05	0.364
A5SS	GRM1	0.000689188	0.102
A5SS	NR3C1	0.00576742	0.368
A5SS	SUPT6H	3.34655e-06	-0.134
A5SS	ZFP90	0.0136793	0.442
A5SS	RNFT1	0.0208674	-0.472
A5SS	MTMR4	0.00129323	0.238
A5SS	AURKAIP1	0.0082008	0.21
A5SS	AURKAIP1	0.0154403	0.219
A5SS	AURKAIP1	0.0223869	0.211
A5SS	RPL34	0	-0.427
A5SS	SOCS7	0.00339175	0.145
A5SS	AMZ2	0.000297572	-0.423
A5SS	REPS1	0.000264405	0.261
A5SS	MYT1	0.0287589	-0.185
A5SS	MORC4	0.00377265	-0.151
A5SS	SPARC	3.99399e-05	-0.121
A5SS	ARMCX4	0.0059457	-0.305
A5SS	UMPS	0.00241219	-0.602
A5SS	ACCS	0.0264651	-0.183
A5SS	NDUFAF6	0.000743723	0.636
A5SS	ZMYND11	0.0167938	-0.276
A5SS	CD63	2.49903e-06	0.118
A5SS	SLC24A4	0.0266957	0.323
A5SS	TRB	0.0362991	0.4
A5SS	CHCHD7	2.95054e-05	0.502
A5SS	HDLBP	0.0352519	0.177
A5SS	TMEM129	0.00216943	-0.11
A5SS	SSBP4	0.0182657	0.221
A5SS	LDB2	0.00964492	-0.238
A5SS	PXYLP1	1.90952e-05	-0.628
A5SS	DYNC2LI1	6.86186e-05	0.186
A5SS	OCIAD1	0.00223738	-0.167
A5SS	PRKAR1B	8.79065e-10	-0.159
A5SS	FN3K	0.00487811	0.187
A5SS	ZFAND4	0.000478506	-0.421
A5SS	PYM1	0.00497502	-0.238
A5SS	CSRNP2	0.0184451	-0.125
A5SS	PFKM	2.1603e-07	-0.198
A5SS	RIMKLB	0.014146	-0.304
A5SS	FBXO6	0.0243807	-0.13
A5SS	ATN1	0.0170446	0.251
A5SS	COPS7A	1.21445e-09	-0.12
A5SS	CHPT1	0.000402165	0.131
A5SS	UHRF2	0.0116	-0.265
A5SS	CYFIP2	3.45532e-05	0.139
A5SS	CRY1	3.77674e-08	-0.174
A5SS	TSSC4	0.0139932	0.157
A5SS	AKAP8L	7.87351e-10	-0.248
A5SS	FAR1	2.69027e-05	-0.157
A5SS	P4HA3	0.00953055	-0.318
A5SS	SHISA5	0.0218089	0.263
A5SS	MPPED2	0.0129024	0.189
A5SS	SPACA6	0.0102342	-0.291
A5SS	AGA	0.00323099	0.151
A5SS	COL27A1	0.0330932	0.218
A5SS	HP1BP3	2.50356e-08	-0.137
A5SS	RNPS1	0.0018915	-0.226
A5SS	NADK	0.0229329	0.357
A5SS	DVL1	2.39013e-08	0.148
A5SS	RAB3D	0.001819	-0.223
A5SS	ZER1	1.5749e-13	-0.186
A5SS	CNTRL	0.0327549	0.264
A5SS	ABITRAM	0.00841944	0.106
A5SS	GALNT12	0.0040621	-0.194
A5SS	NTRK2	0.0056135	-0.124
A5SS	RFK	2.02275e-06	-0.119
A5SS	APBA1	0.0243807	0.311
A5SS	TTC39B	0.023946	0.244
A5SS	SRSF11	0	-0.345
A5SS	PPP1R11	0	-0.152
A5SS	FAM117A	0.000873611	-0.326
A5SS	NAXD	0	0.392
A5SS	FBXL3	0.000267401	-0.112
A5SS	MFN1	0	-0.248
A5SS	ELOF1	0.0163211	0.37
A5SS	PLPPR2	2.63073e-05	-0.373
A5SS	SIPA1	0.00137795	-0.487
A5SS	MADD	5.54654e-05	-0.117
A5SS	STK11	0.00124038	-0.101
A5SS	STK11	0.0132837	-0.235
A5SS	KCNMA1	0.0298826	0.192
A5SS	LCOR	0.0121898	0.17
A5SS	PCDHGC4	0.0052038	0.17
A5SS	KCNIP2	2.52311e-05	-0.267
A5SS	KCNIP2	1.61329e-11	-0.131
A5SS	TSPOAP1	0.0189868	-0.216
A5SS	GFRA1	0.0164224	0.41
A5SS	CALY	0.0233289	0.227
A5SS	CALY	0.0159574	0.292
A5SS	KLC1	0	0.232
A5SS	EMC9	0.00210557	-0.166
A5SS	DIO2	3.01814e-05	-0.358
A5SS	NNT	0.0479708	-0.184
A5SS	MAP1A	6.98273e-05	0.156
A5SS	DCAF11	0.0101909	-0.216
A5SS	DCAF11	0.0291235	-0.201
A5SS	IPO4	0.0398735	0.121
A5SS	PARP6	0.00768429	-0.146
A5SS	AUTS2	0.0185186	-0.11
A5SS	SRSF5	3.065e-12	0.149
A5SS	ZNF789	0.0166862	0.15
A5SS	MOCS2	0.00174127	-0.109
A5SS	MOCS2	0.000523368	-0.179
A5SS	ATPSCKMT	0.000523368	0.503
A5SS	WTAP	0.027776	-0.243
A5SS	SGK1	0.00129336	-0.276
A5SS	PARK7	0.0113576	-0.212
A5SS	TREX2	5.53759e-06	-0.223
A5SS	GRM4	1.69151e-07	-0.113
A5SS	PHRF1	0.0223752	-0.114
A5SS	PPIP5K1	0.0140654	0.22
A5SS	PPIP5K1	0.0120071	0.202
A5SS	TTC3	5.43883e-06	-0.19
A5SS	FSD1L	0.000557976	-0.261
A5SS	FAXDC2	0.000185868	0.484
A5SS	BIN1	0.00269381	-0.101
A5SS	PLD3	2.81044e-06	0.23
A5SS	PLD3	2.14678e-07	0.352
A5SS	DDX46	0.00456736	-0.534
A5SS	ARL6IP5	1.20199e-06	0.136
A5SS	PXK	0.0105009	0.104
A5SS	GALE	0.0402552	-0.447
A5SS	VIPR1	0.00312893	-0.223
A5SS	VIPR1	0.0231423	-0.191
A5SS	CAPN15	0.00646062	-0.178
A5SS	SRRM2	0.000285522	-0.435
A5SS	EPHA10	0.00367976	-0.291
A5SS	FAM174B	0.0346091	-0.243
A5SS	RAB36	0.00661432	0.116
A5SS	HPCA	0.011287	-0.133
A5SS	PPP1R13L	0.014454	-0.161
A5SS	LUC7L	0.00236299	-0.173
A5SS	CNNM1	0.00274597	-0.121
A5SS	TTYH1	6.80706e-07	-0.146
A5SS	PPP1R1B	0.00109803	-0.233
A5SS	ACSL6	1.22063e-05	0.127
A5SS	ATP5ME	0.0225196	0.246
A5SS	SWI5	0.0395404	0.243
A5SS	FAM98C	0.000108925	-0.163
A5SS	LAS1L	3.18218e-05	-0.535
A5SS	SRCIN1	0.0246651	-0.35
A5SS	DUSP22	0.0026343	0.226
A5SS	PQBP1	0.00228532	0.178
A5SS	DPF1	0.0480572	-0.491
A5SS	CABIN1	0.0190758	0.12
A5SS	GPS1	0	-0.248
A5SS	ASH1L	0.000435255	-0.184
A5SS	DPP6	0	-0.153
A5SS	CCNL2	0.0422138	-0.158
A5SS	MTG2	0.00035282	-0.118
A5SS	KMT2E	0.0407282	0.127
A5SS	PHKG2	0.00514872	0.102
A5SS	TTC23	0.0139932	0.147
A5SS	SCN2A	0.00967294	0.151
A5SS	CX3CL1	0.00188433	-0.35
A5SS	APLP1	0.00172558	-0.223
A5SS	APLP1	0.0146894	-0.178
A5SS	ZBTB18	0.0381497	-0.538
A5SS	ARHGEF11	0.000587296	-0.188
A5SS	PCED1A	0.00332302	-0.202
A5SS	PCED1A	0.00520828	-0.192
A5SS	USP19	0.00815261	0.158
A5SS	NIT1	3.07981e-12	-0.477
A5SS	NIT1	0	-0.55
A5SS	LUC7L3	2.11187e-05	-0.167
A5SS	KAT6A	0.000719128	-0.328
A5SS	KIFC2	9.40125e-06	-0.428
A5SS	PNPO	3.91419e-08	-0.22
A5SS	RPS8	1.17347e-10	-0.284
A5SS	CNTN2	0.0091653	-0.276
A5SS	SLITRK2	8.94288e-06	-0.198
A5SS	SLITRK2	4.00074e-06	-0.215
A5SS	PPFIA4	0.00348337	-0.144
A5SS	ATP2B1	5.33581e-08	-0.326
A5SS	ATP2B1	0.000651696	-0.176
A5SS	ZFP90	0.000142796	0.482
A5SS	LMO4	6.84471e-07	0.305
A5SS	AURKAIP1	0.00973507	0.211
A5SS	BACE1	0.00157765	-0.118
A5SS	SLC17A7	0.0053761	-0.176
A5SS	ITGB2	0.0193769	0.323
A5SS	HMBS	0.0252557	-0.14
A5SS	PPP6R2	0.0127347	-0.261
A5SS	PPP6R2	1.73436e-05	-0.124
A5SS	SSBP4	0.00325988	-0.134
A5SS	UBE2D3	4.4201e-07	-0.218
A5SS	OCIAD1	0.00119975	-0.438
A5SS	CSRNP2	1.17086e-11	-0.791
A5SS	DDX17	5.32039e-07	-0.138
A5SS	PACSIN3	3.83576e-05	-0.608
A5SS	FBF1	0.0272509	-0.132
A5SS	LSM14B	0.000222408	-0.493
A5SS	SNRPN	0.000287886	0.114
A5SS	SLC66A1	0.000505361	-0.107
A5SS	ATP13A2	0.0272509	-0.106
A5SS	RNPS1	0.00455968	-0.148
A5SS	RAB3D	0.0146706	-0.345
A5SS	RAB3D	0.011287	-0.363
A5SS	GRIN1	0.0147997	-0.124
A5SS	UNC13B	0.0118665	-0.255
A5SS	NTRK2	0.00999181	-0.383
A5SS	SV2B	0.0114401	0.324
A5SS	PPP1R11	0	0.309
A5SS	LSM1	0.0244319	-0.218
A5SS	ERMARD	0.00507232	-0.287
A5SS	ERMARD	0.00624744	-0.136
A5SS	CAMK2D	0.0134592	0.102
A5SS	PEX6	2.3353e-05	-0.608
A5SS	SLC19A2	0.0298648	-0.238
A5SS	FDX1	0.0121309	0.146
A5SS	OPALIN	0.0154169	0.227
A5SS	CALY	0.03544	0.183
A5SS	PLEKHH1	0.000110329	0.24
A5SS	MZT2B	2.12795e-07	0.102
A5SS	DCAF11	0.0336727	-0.138
A5SS	LINGO1	0.00042729	-0.162
A5SS	LINGO1	1.98975e-08	-0.12
A5SS	SRSF5	6.68896e-11	0.108
A5SS	PAM	0.00216943	0.221
A5SS	PAM	0.000689188	0.271
A5SS	MTSS2	0.00818567	-0.536
A5SS	POC5	0.0395399	-0.24
A5SS	ACOT4	0.0296158	0.415
A5SS	MOCS2	0.00058167	-0.185
A5SS	NDUFS6	1.12257e-07	0.107
A5SS	KLHDC3	0.0328197	0.183
A5SS	GRM4	1.37795e-08	-0.119
A5SS	DDX39B	3.12421e-05	0.131
MXE	EIPR1	2.08548e-05	-0.172
MXE	EIPR1	3.85824e-07	-0.19
MXE	EIPR1	0.00414145	0.12
MXE	PDIA6	2.18704e-07	-0.195
MXE	SMC6	0.0416993	-0.123
MXE	DNMT3A	0.00185659	-0.207
MXE	TMEM214	9.28908e-08	-0.256
MXE	ATRAID	1.00698e-06	0.211
MXE	ATRAID	4.90499e-07	0.205
MXE	PIGF	0.020952	-0.237
MXE	PIGF	0.0281886	-0.145
MXE	MCFD2	2.11437e-07	0.232
MXE	USP34	0.000149775	-0.215
MXE	FANCL	2.19414e-06	0.458
MXE	AFTPH	5.92442e-07	-0.227
MXE	SPRED2	0.00568768	-0.115
MXE	ZNF638	5.03212e-06	-0.181
MXE	CHMP3	1.41596e-14	-0.251
MXE	MGAT4A	1.87939e-10	0.329
MXE	CRACDL	1.50915e-07	-0.19
MXE	UNC80	0.00038021	-0.167
MXE	UNC80	0.000202935	-0.168
MXE	MYO1B	9.89378e-07	-0.439
MXE	RBM45	0.0141001	0.16
MXE	SP3	0.000258447	0.153
MXE	SP3	0.000180946	-0.175
MXE	PPIP5K1	0.00321786	-0.201
MXE	PPIP5K1	5.68355e-08	-0.141
MXE	PPIP5K1	3.5585e-07	-0.141
MXE	PKP4	1.25288e-06	-0.137
MXE	PKP4	2.62305e-08	-0.185
MXE	PKP4	0.000219124	-0.11
MXE	GRINA	0	-0.237
MXE	TMOD1	0.00433622	-0.21
MXE	FTO	0.0366705	-0.145
MXE	FAM168A	0.00048094	0.103
MXE	ACAD9	7.1388e-05	-0.263
MXE	CD47	0.000611349	-0.104
MXE	CD47	4.92874e-10	0.343
MXE	IQCB1	0.00246504	0.305
MXE	AGAP1	3.33302e-06	-0.126
MXE	AGAP1	0.000134067	-0.194
MXE	AGAP1	0.0242743	0.115
MXE	AGAP1	2.11758e-07	0.351
MXE	AGAP1	1.97911e-11	0.372
MXE	TMEM41A	0.00408159	-0.285
MXE	USP16	0.00142756	-0.146
MXE	COL9A2	0	-0.449
MXE	TENM2	0.00034749	-0.361
MXE	RWDD3	0.0012593	-0.366
MXE	RWDD3	1.80149e-05	-0.557
MXE	TBL1XR1	0.00565243	-0.143
MXE	ATP6V1H	2.66527e-05	-0.161
MXE	CACNA2D2	0.00957318	-0.169
MXE	TRNT1	5.14078e-07	0.187
MXE	SYNJ1	1.07825e-12	-0.228
MXE	AP1B1	0.00492648	-0.142
MXE	ATAD1	0.0294373	-0.107
MXE	ADAM22	3.54013e-12	0.362
MXE	TTC3	0	-0.263
MXE	ARL2BP	0	0.305
MXE	ARL2BP	3.3358e-08	0.226
MXE	HDAC11	3.65182e-08	-0.219
MXE	HDAC11	6.70666e-07	-0.193
MXE	SFXN5	4.56004e-10	-0.204
MXE	SFXN5	7.83281e-09	-0.181
MXE	SFXN5	0.00624807	0.123
MXE	MED13	0.000984276	0.204
MXE	BNIP1	0.00691002	-0.253
MXE	CREBRF	2.99957e-11	0.403
MXE	ZNF213	0.0411623	-0.156
MXE	CAMK2A	4.38502e-10	0.143
MXE	PPP2R2B	2.95541e-08	0.119
MXE	RELL2	0	0.292
MXE	RELL2	1.17348e-13	0.164
MXE	RNF130	0.0459199	0.101
MXE	RNF130	2.30567e-08	0.216
MXE	SLC25A48	9.18839e-08	-0.564
MXE	BIN1	9.75371e-06	0.131
MXE	BIN1	7.47693e-09	0.115
MXE	PLD3	0	-0.117
MXE	PLD3	0	-0.17
MXE	FSTL4	7.82652e-06	-0.305
MXE	RAB2A	0	0.228
MXE	RAB2A	0	0.382
MXE	KCNJ6	0.00128937	0.242
MXE	CDC42SE2	1.02937e-12	-0.329
MXE	PLPP4	0.0217162	-0.214
MXE	PLPP4	0.003133	-0.22
MXE	PLPP4	0.00634887	-0.14
MXE	ABI2	0.013919	-0.143
MXE	CLK4	0.0023282	0.155
MXE	JMJD4	0.0153411	-0.19
MXE	GMPPB	0.0225542	0.194
MXE	SLMAP	0.00660997	0.214
MXE	CACNA2D3	3.08597e-05	0.224
MXE	CAMK1	1.20501e-07	-0.186
MXE	MARCHF1	0.0284401	0.256
MXE	MARCHF1	0.032739	0.165
MXE	ATP2B2	0.0103941	0.108
MXE	NEIL2	0.0136613	0.153
MXE	TENM1	0.0306812	-0.333
MXE	TFDP2	0.0201204	0.303
MXE	MRAS	0	-0.278
MXE	MRAS	1.84597e-07	-0.139
MXE	MRAS	5.19313e-08	-0.108
MXE	MRAS	6.41691e-08	-0.144
MXE	MRAS	0.000248224	-0.106
MXE	MRAS	1.41596e-14	0.272
MXE	NELL1	1.27019e-12	-0.387
MXE	RPS2	0	0.482
MXE	ACP1	0.00499381	0.11
MXE	TOP2B	0	0.339
MXE	MLH1	0.00297661	0.206
MXE	RABGEF1	6.98053e-09	-0.274
MXE	RABGEF1	2.64123e-07	-0.269
MXE	HMGXB3	0.00048094	-0.229
MXE	SCAP	1.81168e-05	0.231
MXE	SGMS1	0.0317361	-0.117
MXE	SGMS1	0.0400421	-0.161
MXE	SGMS1	0.0496859	0.121
MXE	RHOA	0	-0.271
MXE	DAG1	3.54098e-05	0.499
MXE	APEH	0.00100193	-0.183
MXE	FBXO44	0.0307023	-0.19
MXE	CDH10	5.56298e-09	-0.282
MXE	CHL1	2.81272e-07	-0.218
MXE	CHL1	5.6713e-09	-0.239
MXE	CHL1	5.95078e-09	-0.154
MXE	PDZRN3	0.00659962	-0.504
MXE	MAPK3	3.67186e-07	-0.111
MXE	WDR19	0.0287752	0.355
MXE	RNF41	7.97784e-09	-0.232
MXE	RNF41	0.000961645	-0.134
MXE	PLPPR4	0.0095444	0.113
MXE	PLPPR4	0.00117308	0.106
MXE	URB2	0.0140989	-0.334
MXE	MYRIP	0.00244548	-0.148
MXE	ABLIM3	0.0352479	-0.11
MXE	ABLIM3	1.7168e-06	-0.245
MXE	CEP170	0.0438713	0.172
MXE	CLU	0	-0.242
MXE	TSC2	0.00117333	-0.145
MXE	BTBD3	4.02911e-14	-0.21
MXE	GLYR1	0.00291305	-0.102
MXE	RBFOX1	0	0.212
MXE	RBFOX1	0.0265958	0.118
MXE	RBFOX1	1.42158e-06	-0.215
MXE	RBFOX1	1.29845e-13	-0.218
MXE	EPHA10	5.61028e-05	0.138
MXE	GRIN2A	0.0244211	-0.197
MXE	PCBD2	0.000380304	0.252
MXE	RERE	0.00363622	0.109
MXE	USP31	3.26859e-06	-0.262
MXE	PRKCB	0	0.31
MXE	FBRSL1	0.0113693	-0.222
MXE	EPHB1	0.000404076	-0.161
MXE	ZNF385A	1.98062e-07	-0.175
MXE	ST3GAL5	3.92719e-10	0.253
MXE	LRRC43	0.00315429	-0.365
MXE	ACTN4	0.012252	-0.114
MXE	REEP5	7.31139e-15	-0.18
MXE	RANBP9	0.0119099	0.136
MXE	HPS3	2.59717e-13	0.6
MXE	ZFAND2A	0.0117719	0.167
MXE	RHBDD3	0.0180252	0.126
MXE	INPP5J	0.0234526	0.114
MXE	PISD	0.0212116	0.102
MXE	FBXL6	0.0290998	-0.19
MXE	FBXL6	1.5841e-08	0.31
MXE	FBXL6	0.00468942	-0.203
MXE	FBXL6	0.00889861	-0.215
MXE	SGSM1	0.0141099	-0.113
MXE	ATP6V0B	3.32e-09	0.174
MXE	ERICH1	0.0353325	-0.173
MXE	ARVCF	0.00689074	0.171
MXE	SLC41A3	0.0131677	-0.161
MXE	SLC41A3	0.0379225	0.132
MXE	FEZ1	2.49543e-12	0.193
MXE	GABRA3	3.91957e-06	-0.173
MXE	FBXL2	0.00231832	0.249
MXE	NTM	2.74194e-07	-0.153
MXE	PAFAH1B1	0	0.269
MXE	UBE2E2	2.15504e-07	-0.209
MXE	STX18	2.2674e-07	-0.174
MXE	STX18	0.0442524	-0.149
MXE	PCBP2	0	0.194
MXE	PCBP2	3.36321e-11	-0.157
MXE	MBIP	0.00136509	-0.149
MXE	SLC24A3	0.000700799	0.187
MXE	MRPL4	0.00337682	-0.139
MXE	RGL1	0.0155137	0.158
MXE	YME1L1	0	0.234
MXE	ASTN1	9.67402e-06	0.162
MXE	ILDR2	0.0480799	-0.307
MXE	MT2	0	-0.315
MXE	BOD1	0.00511473	-0.154
MXE	CLASP1	0.00271601	-0.182
MXE	IMMP2L	0.00165119	-0.271
MXE	ANLN	0	0.446
MXE	MLLT1	1.35075e-06	-0.238
MXE	MTRR	0.0145934	0.154
MXE	MAP4	0	-0.219
MXE	MAP4	0	-0.22
MXE	MAP4	0	-0.157
MXE	WIPF3	1.51619e-07	0.17
MXE	TAX1BP1	1.47613e-08	0.176
MXE	BMERB1	8.08846e-06	-0.395
MXE	GGPS1	0.00467595	0.161
MXE	RBM11	3.43085e-10	-0.466
MXE	TBCE	0.00266288	0.245
MXE	VPS50	0.0400393	-0.147
MXE	VAMP4	4.84841e-10	0.186
MXE	PPP2R3A	6.80308e-06	-0.176
MXE	ZBED6	0.0169251	-0.116
MXE	TMEM50B	3.0041e-13	0.304
MXE	MYT1L	3.6374e-06	-0.162
MXE	MYT1L	0.000200343	-0.174
MXE	PSMA2	4.72459e-13	0.259
MXE	NRCAM	5.81169e-07	-0.204
MXE	NRCAM	1.30933e-08	-0.12
MXE	PIGX	0.000358205	0.255
MXE	SEC61A1	5.82163e-11	-0.211
MXE	EEFSEC	0.00100193	-0.218
MXE	MTCL1	0.0111103	-0.143
MXE	PHC1	2.17774e-06	0.298
MXE	PHC1	4.07217e-05	0.288
MXE	GAREM1	2.75676e-05	-0.208
MXE	IFTAP	0.0487681	-0.107
MXE	FHOD3	4.12649e-09	0.245
MXE	FHOD3	7.37664e-08	0.212
MXE	SRPK2	8.98018e-06	0.136
MXE	SMAD2	5.7852e-07	0.306
MXE	DIP2B	8.26945e-05	-0.186
MXE	AUH	7.82156e-06	-0.193
MXE	AUH	0.000740848	-0.185
MXE	RIDA	0	-0.247
MXE	KDSR	0.0110054	-0.255
MXE	MLIP	0.00167737	0.478
MXE	SDHC	0	-0.219
MXE	AMPH	3.51789e-11	0.187
MXE	RALYL	3.43122e-14	0.206
MXE	KDRL	1.41596e-14	-0.178
MXE	KDRL	1.11428e-08	-0.116
MXE	KDRL	2.2352e-13	0.217
MXE	KDRL	0	0.315
MXE	ARMC1	0.00743419	0.13
MXE	YTHDF3	0.00345436	0.173
MXE	GLT1D1	0.0233674	0.166
MXE	TMEM68	0.018629	-0.108
MXE	ST18	0.00220686	-0.106
MXE	CARMIL1	0.0406167	-0.112
MXE	PTBP2	0.0052124	0.146
MXE	PLPPR5	0.0313101	-0.132
MXE	PRKCG	4.07379e-07	-0.14
MXE	PRKCG	3.75883e-05	-0.121
MXE	SMOX	0.00410714	-0.154
MXE	BRINP1	0	0.323
MXE	CD46	0.0124465	0.253
MXE	CD46	0.0257171	0.371
MXE	MRPS34	0.0011509	0.152
MXE	ERICH2	0.0282102	0.192
MXE	DDR2	0.00594775	0.212
MXE	PDE4DIP	0.023222	-0.117
MXE	DBN1	0	-0.459
MXE	CCDC9B	0.0246377	0.277
MXE	RNF216	0.0318728	-0.205
MXE	PPCDC	0.0482229	-0.108
MXE	MTMR3	1.33796e-09	-0.321
MXE	MTMR3	0.00150491	-0.155
MXE	KLHDC10	0.00676966	0.134
MXE	DCTN1	0.00330407	-0.236
MXE	DCTN1	0.00151382	-0.267
MXE	MMP16	0.0308031	0.158
MXE	PEX11B	0.00016415	-0.229
MXE	HACD2	4.02911e-14	-0.282
MXE	DNM1L	0.000277433	0.111
MXE	SLC2A11	0.0383775	0.312
MXE	TSPAN7	0	-0.369
MXE	TSPAN7	0	0.164
MXE	TSPAN7	6.85662e-11	-0.14
MXE	TSPAN7	5.60616e-12	-0.151
MXE	ARFRP1	3.24866e-06	-0.186
MXE	SKIV2L	0.00182656	0.157
MXE	SH3BGRL	0.000250709	0.138
MXE	ACTR3B	0	-0.273
MXE	ACTR3B	5.03352e-13	-0.229
MXE	ELMO1	0.000682245	-0.102
MXE	MMD2	0.00375332	-0.162
MXE	MMD2	0.00234858	0.102
MXE	MMD2	0.024952	-0.291
MXE	HDAC5	0	0.333
MXE	HDAC5	0	-0.27
MXE	PGS1	0.036565	-0.128
MXE	ANKRD12	9.93773e-08	0.267
MXE	TIPIN	0.00345763	-0.281
MXE	ZNF512	0.0470933	-0.182
MXE	ZNF512	0.000261927	0.247
MXE	ALG11	0.0441756	-0.122
MXE	ALG11	0.0457056	-0.12
MXE	E2F4	0.00676929	0.188
MXE	ZDHHC1	0	0.438
MXE	TMCO6	0.0226701	-0.156
MXE	ERAL1	0.000964483	-0.214
MXE	ZNF19	0.000121085	0.358
MXE	PRMT8	7.73376e-07	0.24
MXE	DOK4	0.00802633	-0.171
MXE	BCAR1	8.08593e-08	-0.239
MXE	CDYL2	0.00167397	0.396
MXE	CDYL2	3.66095e-05	0.205
MXE	STPG1	0.000181846	0.57
MXE	DRP2	8.40916e-05	0.358
MXE	REPS2	0.00175302	0.138
MXE	REPS2	2.06554e-08	0.235
MXE	ZNF484	0.0133543	-0.163
MXE	AKT2	6.33204e-10	0.256
MXE	GALNT11	0	-0.253
MXE	GALNT11	6.58433e-09	0.22
MXE	GALNT11	0.00425199	-0.328
MXE	TTYH1	0.000295791	0.139
MXE	NDRG2	0	-0.193
MXE	NDRG2	0.00855705	-0.135
MXE	ACSL6	0.000103302	-0.138
MXE	ACSL6	0.000253538	-0.134
MXE	KLHL36	0.00445636	-0.17
MXE	GDPD1	0	0.341
MXE	PIGK	0	-0.27
MXE	PIGK	6.44754e-05	-0.166
MXE	PLAAT3	0.0375754	0.119
MXE	DGKG	0.00395322	0.116
MXE	DGKG	0.00150182	-0.125
MXE	CADPS	1.87934e-10	-0.21
MXE	CADPS	5.17222e-11	0.201
MXE	PJA2	5.70435e-05	-0.111
MXE	RSAD1	0.00208325	-0.283
MXE	EPB41L1	0.00231286	-0.162
MXE	EPB41L1	7.47183e-12	0.212
MXE	EPB41L1	0	0.235
MXE	FGD6	0.0112463	0.482
MXE	CELF4	4.88787e-06	-0.131
MXE	ZNF805	0.0170504	0.265
MXE	SHISA7	0	0.635
MXE	GINS1	0.032739	-0.123
MXE	RYR1	0.0262504	-0.208
MXE	ZDHHC20	0.032793	0.17
MXE	RASIP1	0.000553836	-0.34
MXE	GABRG2	4.88766e-07	-0.145
MXE	R3HDM4	0.0431791	-0.116
MXE	ST3GAL4	0.00027939	-0.217
MXE	EIF3H	0	0.421
MXE	CZIB	1.34851e-06	-0.22
MXE	MICAL2	0.0179139	0.15
MXE	MICAL2	4.02911e-14	0.231
MXE	SH3BP5L	0.0494899	-0.107
MXE	GRIK5	3.43319e-07	-0.185
MXE	MIEF1	2.7495e-05	-0.315
MXE	RABEP1	9.79176e-07	0.172
MXE	MARK2	0.000340122	0.135
MXE	MBD1	1.65872e-05	-0.283
MXE	KLHL32	4.77997e-06	-0.412
MXE	KLHL32	0.000625613	-0.359
MXE	KLHL32	0.00422667	-0.184
MXE	KLHL32	0.0154664	0.158
MXE	SLC24A2	0.000553234	0.106
MXE	MARCHF7	0.00716945	-0.126
MXE	CUL1	6.85662e-11	-0.222
MXE	ZC3H7A	2.06037e-07	0.449
MXE	DPCD	5.48738e-07	-0.198
MXE	DPCD	7.83145e-08	-0.281
MXE	GNB1	0	0.249
MXE	KCNT2	0.0186504	0.154
MXE	KCNT2	0.0336764	0.139
MXE	EGLN2	8.88998e-13	-0.31
MXE	EGLN2	1.83553e-05	-0.123
MXE	EGLN2	0.000457979	0.14
MXE	EGLN2	0.00176371	-0.189
MXE	KCNIP4	0	0.307
MXE	KCNIP4	0	0.433
MXE	DNAJA3	0	0.338
MXE	WRAP53	0.0220282	0.161
MXE	TSPAN11	0.0313295	-0.172
MXE	SCARB1	0.0162577	-0.225
MXE	TSNAXIP1	0.00237589	0.377
MXE	TIAM1	0.00182358	0.134
MXE	STK32A	0.00304505	0.284
MXE	PAIP1	4.33066e-11	-0.177
MXE	PC	4.47392e-07	-0.165
MXE	KYAT1	1.01539e-10	-0.317
MXE	HSPBP1	0.000140493	0.166
MXE	KIF5A	0.0113398	0.139
MXE	GYAR	0.0188447	0.301
MXE	ABHD5	5.36333e-05	-0.207
MXE	MRPS18A	0.00144816	-0.143
MXE	FUZ	1.47214e-05	-0.25
MXE	EMSY	0.0019384	-0.327
MXE	FAM135B	0.0110329	-0.23
MXE	ARHGEF10L	0.0238157	0.254
MXE	ARHGEF10L	0.0459199	0.203
MXE	CORO2B	8.22431e-05	-0.147
MXE	STAMBPL1	0.0191168	0.23
MXE	SNCAIP	0.0336764	-0.197
MXE	PRXL2C	0.0260501	0.336
MXE	PRXL2C	0.0311737	0.313
MXE	CALCOCO2	9.10078e-05	-0.306
MXE	CACNA2D1	0.00045952	0.173
MXE	CACNA2D1	0.020324	-0.175
MXE	EIF4G1	1.0837e-06	-0.202
MXE	EIF4G1	8.43186e-10	-0.265
MXE	CA3	5.03352e-13	-0.152
MXE	TNNT1	0.00679545	-0.133
MXE	SRCIN1	0.00705367	-0.258
MXE	SRCIN1	0.00565243	0.212
MXE	SRCIN1	0.0220817	0.203
MXE	SRCIN1	0.00623354	-0.303
MXE	PDXK	2.10581e-11	0.182
MXE	INTS8	7.31139e-15	0.36
MXE	EIF4A2	0	0.278
MXE	CLIP2	0.00705062	0.124
MXE	LZTR1	0.00136472	0.115
MXE	LZTR1	2.51373e-08	-0.166
MXE	STRN	4.09952e-05	0.214
MXE	MAPRE2	6.60185e-14	-0.234
MXE	MAPRE2	0	-0.135
MXE	NLGN3	0.000231837	0.12
MXE	PDK2	6.68889e-05	-0.128
MXE	TOX4	0	-0.392
MXE	NELFCD	0	-0.533
MXE	NELFCD	1.14384e-11	-0.193
MXE	EIF2S3	0	-0.332
MXE	ATF6	0.0245269	-0.153
MXE	ATF6	0.0237732	0.108
MXE	PTCH2	1.26435e-06	-0.277
MXE	GNAS	1.17216e-08	0.114
MXE	GNAS	8.11327e-10	0.124
MXE	SLCO3A1	0.00704693	-0.106
MXE	YKT6	2.32035e-07	-0.112
MXE	SLC25A40	1.72647e-06	0.249
MXE	PEG3	4.02911e-14	-0.213
MXE	PEG3	7.31139e-15	-0.216
MXE	PEG3	1.92373e-13	-0.205
MXE	ADGRB3	8.71411e-06	0.281
MXE	COPS8	3.48324e-09	-0.183
MXE	FLOT1	0.000164649	-0.109
MXE	GABRA6	4.66062e-14	-0.259
MXE	SLC22A5	1.8701e-08	0.386
MXE	SPAG9	0.0127855	-0.105
MXE	CELF2	1.57251e-05	-0.185
MXE	WNK2	5.03212e-06	0.205
MXE	WNK2	0.000121173	0.155
MXE	WNK2	0.00553164	0.135
MXE	WNK2	0.000541938	0.178
MXE	WNK2	2.02775e-07	0.203
MXE	WNK2	1.65552e-05	-0.18
MXE	TRAM1	0.0032097	-0.289
MXE	TYW5	0.00241763	-0.404
MXE	LAMP5	3.07028e-05	0.197
MXE	SLC35F5	0.0019384	0.202
MXE	HS3ST4	2.70198e-13	-0.452
MXE	KCTD1	5.22751e-06	0.248
MXE	PORCN	0.0174145	0.25
MXE	L1CAM	0.000519388	0.116
MXE	PAK3	0.000747195	-0.22
MXE	COL23A1	0.0365588	0.381
MXE	DCAF8	7.63957e-06	0.201
MXE	BMT2	1.42259e-05	0.36
MXE	BET1	0.00944235	-0.155
MXE	ALDH6A1	4.88766e-07	-0.206
MXE	NAE1	0.00609403	0.141
MXE	ARL2	0	-0.359
MXE	WASF1	0.0470615	0.141
MXE	CABIN1	0.0387169	-0.113
MXE	LRP1	0.000145047	-0.143
MXE	PANK2	5.40853e-07	0.299
MXE	RBFOX3	1.58729e-09	-0.114
MXE	RBFOX3	0.0107547	-0.141
MXE	B3GALT1	0.0109784	0.228
MXE	GDI1	0	-0.232
MXE	TARBP1	1.48726e-08	0.587
MXE	MATN2	0.00100193	-0.208
MXE	PROCA1	0.0206899	-0.271
MXE	QPCT	0.00492418	0.15
MXE	IDH3G	7.31139e-15	-0.159
MXE	SCAPER	1.61818e-05	0.32
MXE	EFL1	3.94488e-05	-0.237
MXE	ZNF606	0.0407129	-0.221
MXE	PIP4K2B	0.00100491	0.177
MXE	UGDH	0.0225579	-0.248
MXE	TLK2	0.00328097	0.203
MXE	TLK2	0.0285703	0.111
MXE	TLK2	0.00240586	-0.221
MXE	MED6	0.00116027	-0.279
MXE	PPP6R1	0.000873259	-0.148
MXE	PPP6R1	3.07937e-07	-0.255
MXE	WSCD1	0.0467096	0.126
MXE	NCSTN	7.31139e-15	0.242
MXE	PCNX1	0.0111104	0.281
MXE	PCNX1	0.028131	0.294
MXE	ADCY8	6.73298e-08	0.27
MXE	FGF1	0.000229045	0.123
MXE	P4HTM	0	0.273
MXE	MRPL48	0	0.437
MXE	GDPD5	0.00178906	0.121
MXE	CCDC93	0.00883228	-0.279
MXE	PSMG1	1.88731e-07	-0.245
MXE	PSMG1	3.61184e-10	-0.284
MXE	IQUB	1.10685e-09	0.132
MXE	TBRG1	3.39665e-07	0.23
MXE	TBRG1	0.00237148	0.267
MXE	UNC5D	0.0263396	-0.278
MXE	MTRF1L	2.60453e-08	0.372
MXE	MSH6	1.62125e-07	-0.259
MXE	RIC1	0.0330277	0.258
MXE	HM13	0	0.528
MXE	XIAP	0.0201134	0.155
MXE	GRIA3	1.47521e-05	-0.265
MXE	GRIA3	0.000621977	0.199
MXE	CDK20	0.0438381	-0.167
MXE	VANGL2	0.000422459	-0.199
MXE	NACC2	0.000668926	-0.129
MXE	DCXR	3.06557e-06	-0.264
MXE	MTG2	0.00613025	0.401
MXE	TMEM132D	0.000891707	-0.244
MXE	MAP2	0.0470256	0.101
MXE	MBNL1	0.00139864	0.13
MXE	MBNL1	0.0241914	0.173
MXE	MBNL1	0.0265101	0.109
MXE	AFF2	0.00545658	-0.518
MXE	ARHGAP39	0.004536	-0.166
MXE	OXR1	3.36066e-06	0.143
MXE	TUBA8	0.0178909	-0.115
MXE	TUBA8	0.0148269	-0.115
MXE	RGS7	1.00578e-08	-0.251
MXE	ABHD10	8.33761e-07	-0.253
MXE	ATP8A1	3.46013e-06	0.132
MXE	TMEM67	0.00373666	0.226
MXE	PDZD11	5.50111e-05	-0.138
MXE	PDZD11	3.2359e-07	-0.25
MXE	BCAS1	0.000374508	0.211
MXE	BCAS1	0.000184724	0.126
MXE	EPHB3	2.10637e-08	0.547
MXE	USP15	0.000111699	0.209
MXE	GPR89	0.000926516	-0.166
MXE	SLC10A3	0.0311737	-0.193
MXE	DENR	0	0.337
MXE	BLOC1S6	9.50144e-10	-0.35
MXE	DHDDS	3.25021e-08	-0.239
MXE	ST8SIA5	0.0270958	0.105
MXE	ST8SIA5	0.000297637	0.192
MXE	RAPGEF5	0.0116692	0.335
MXE	OPHN1	0.0459199	-0.176
MXE	OSBPL1A	8.37376e-05	0.164
MXE	OSBPL1A	8.17495e-05	0.146
MXE	DTNA	0	-0.236
MXE	DTNA	4.23002e-11	0.252
MXE	HNRNPA2B1	0	0.331
MXE	RHEB	1.21378e-07	0.162
MXE	PFDN1	0.00403715	-0.114
MXE	CACFD1	0.00678245	-0.235
MXE	ELP1	0.000667212	0.251
MXE	ELP1	0.0166119	0.208
MXE	BSDC1	3.57276e-05	0.177
MXE	GLG1	1.62249e-06	-0.214
MXE	DSCAML1	0.00818061	-0.276
MXE	CHD6	0.0161441	-0.184
MXE	APP	0	-0.243
MXE	RIPK1	0	-0.359
MXE	DLGAP4	0.0475578	-0.102
MXE	ZMYM5	4.0793e-10	-0.253
MXE	NOL4	2.45136e-06	0.186
MXE	FAM135A	0.000537311	-0.231
MXE	ZMIZ2	7.95431e-07	-0.178
MXE	TCERG1	0.00326817	0.118
MXE	CP	0.00288635	-0.332
MXE	FRRS1L	1.31202e-06	0.157
MXE	RCN3	0.00506065	-0.118
MXE	APLP1	1.94098e-11	-0.161
MXE	APLP1	0	-0.296
MXE	APLP1	0	-0.157
MXE	APLP1	0	-0.558
MXE	APLP1	0	-0.283
MXE	APLP1	0	-0.234
MXE	APLP1	0	0.142
MXE	APLP1	2.51936e-08	0.135
MXE	APLP1	1.47613e-08	0.135
MXE	DNAJC6	0	0.284
MXE	DNAJC6	0	-0.255
MXE	ATF1	0.0021729	0.175
MXE	SHANK1	0	0.269
MXE	CAMK2B	0	0.242
MXE	PRELID3B	0.0006657	-0.137
MXE	CYP46A1	0.000170964	0.124
MXE	CYB5A	0.00161753	-0.155
MXE	TMEM255A	1.61971e-05	-0.232
MXE	SIRT2	0.00119178	0.155
MXE	SNAP25	0	0.253
MXE	NCOA6	5.65456e-05	0.343
MXE	PAK5	0.0210648	0.166
MXE	PAK5	2.34983e-10	-0.314
MXE	PPP1R7	3.87791e-07	-0.234
MXE	ANKS1B	2.30847e-10	-0.187
MXE	WAC	3.11888e-07	-0.139
MXE	NKAIN2	3.52459e-06	-0.32
MXE	TMEM39B	1.72249e-05	-0.338
MXE	ST6GALNAC6	0	-0.34
MXE	PTPRA	0	0.264
MXE	PTPRA	4.14634e-07	0.118
MXE	PTPRA	0.0217189	0.149
MXE	CLTC	3.12363e-11	0.183
MXE	FKBP1A	0	-0.293
MXE	PSMF1	2.84409e-07	0.24
MXE	NIT1	0.00173558	0.15
MXE	ACOX1	3.3358e-08	-0.108
MXE	UBE2Q2	0.028344	0.169
MXE	C18ORF25	0.00337682	-0.234
MXE	RNF126	5.6713e-09	-0.215
MXE	MAPK10	0.000599197	-0.14
MXE	MAPK10	0	-0.179
MXE	MAPK10	2.94477e-05	-0.13
MXE	DIXDC1	0.0425179	-0.337
MXE	GRK4	0.000232583	-0.18
MXE	RBM12	3.10425e-07	0.461
MXE	RBM12	0.00527433	0.226
MXE	PTPRN2	2.01861e-08	-0.105
MXE	PTPRN2	0	-0.206
MXE	FAM168B	0.00582392	0.107
MXE	UBL3	0	-0.234
MXE	ARFGAP1	2.10489e-14	-0.247
MXE	ABCC8	0.0265101	-0.201
MXE	EIF4A1	2.37488e-06	-0.265
MXE	OSER1	0.00219274	-0.186
MXE	ZMIZ1	0.0183203	-0.153
MXE	SYS1	0.0026448	-0.154
MXE	SLC35C2	0.0176155	-0.105
MXE	SLC35C2	0.00755638	0.18
MXE	ELMO2	0.000694728	-0.147
MXE	PTGIS	0.00904861	-0.297
MXE	UBE2V2	0.00359714	-0.112
MXE	MSH3	0.0320798	-0.131
MXE	PLXNB1	3.83429e-13	-0.404
MXE	FAT1	0.00984	-0.346
MXE	ATP9A	5.81573e-06	0.131
MXE	SAMD12	0.0011219	-0.135
MXE	SAMD12	0.000480921	-0.229
MXE	AP3D1	0	-0.269
MXE	PNPO	8.22914e-10	-0.281
MXE	CLVS1	0	-0.376
MXE	CDK5	0	-0.615
MXE	ARHGAP5	1.93386e-07	-0.182
MXE	MED27	0.000494827	-0.221
MXE	MED27	0.0111102	-0.12
MXE	MED27	4.87946e-07	-0.219
MXE	MED27	0.000422166	-0.214
MXE	CUTA	1.97387e-06	0.221
MXE	CUTA	0.00162665	0.24
MXE	SUMO2	2.28769e-07	0.127
MXE	USP5	0.0039717	0.113
MXE	GAS7	6.65177e-08	0.28
MXE	GAS7	0.0263101	-0.104
MXE	SORL1	0.00160806	-0.158
MXE	SORL1	0.0230333	-0.144
MXE	SORL1	7.25527e-10	0.25
MXE	SORL1	1.26762e-11	0.253
MXE	SAXO2	0.0258152	0.389
MXE	NUDT3	2.96984e-05	-0.24
MXE	SLC8A2	1.05594e-10	-0.168
MXE	SLC8A2	3.65189e-07	-0.131
MXE	ATP6V1C1	0	0.317
MXE	CPEB1	0.000562452	-0.201
MXE	SEC11A	9.71664e-11	-0.229
MXE	SVOP	1.64605e-08	-0.19
MXE	MMS19	7.31139e-15	0.346
MXE	MAPKAP1	3.40646e-06	-0.176
MXE	MAPKAP1	0.00237148	0.127
MXE	SEPTIN9	1.43424e-07	0.192
MXE	AP3S2	0.0037512	-0.173
MXE	RAB21	0.0328777	0.118
MXE	RHOBTB2	0.000145628	-0.187
MXE	ALS2	0.00032132	-0.159
MXE	SMARCA4	2.16571e-09	0.204
MXE	SMARCA4	0.00140461	0.132
MXE	PLXNC1	0.0443392	-0.22
MXE	FBXO25	0.00151485	-0.454
MXE	PRPSAP1	0	-0.267
MXE	NT5M	3.29566e-06	0.347
MXE	SAMD4B	0	-0.497
MXE	SS18L1	0.00018799	0.172
MXE	CMIP	3.65234e-11	-0.193
MXE	JAKMIP2	7.95192e-05	0.214
MXE	CAMTA2	5.77712e-13	-0.262
MXE	CAMTA2	0	-0.474
MXE	COX10	0.00391858	-0.242
MXE	TFG	1.52782e-07	-0.218
MXE	TFG	3.44043e-06	-0.179
MXE	SH3GL2	1.41542e-08	-0.149
MXE	TTC7B	0.000672103	0.131
MXE	TTC7B	0.00213866	0.124
MXE	TTC7B	0.000229178	0.118
MXE	TTC7B	0	-0.362
MXE	TTC7B	0	-0.449
MXE	TTC7B	0.00674926	0.104
MXE	KIAA0100	0.00233378	0.28
MXE	SUSD4	0.0141573	-0.119
MXE	SUSD4	4.6032e-06	-0.128
MXE	OGDHL	2.38862e-09	-0.224
MXE	MICAL3	7.83281e-09	-0.169
MXE	EIF5A	0	-0.228
MXE	PLPPR1	0.0070335	-0.185
MXE	DLG4	0	-0.327
MXE	MLLT10	1.45887e-06	0.36
MXE	UBE2G1	0.00113304	0.167
MXE	PACC1	0.0129782	0.228
MXE	ZNF180	0.044655	0.151
MXE	GRIA1	0	-0.253
MXE	GRIA1	3.0786e-07	0.141
MXE	DGCR2	3.43319e-07	-0.194
MXE	DGCR2	0	-0.313
MXE	DGCR2	6.67583e-07	-0.183
MXE	DGCR2	0	-0.208
MXE	DGCR2	9.99242e-07	-0.132
MXE	DGCR2	2.73391e-10	-0.12
MXE	SEZ6	1.55518e-05	0.158
MXE	PHF12	9.4722e-06	-0.234
MXE	ATP2B1	2.37343e-06	-0.174
MXE	PLD2	1.00169e-05	0.192
MXE	B4GALT6	6.58446e-06	0.23
MXE	B4GALT6	1.36933e-05	-0.207
MXE	FDPS	0.0178641	-0.169
MXE	RTN4IP1	0.00137312	0.311
MXE	RAB18	0.0021926	0.107
MXE	RAB18	0.000185451	-0.165
MXE	TLE5	0	0.284
MXE	DKK3	1.68447e-11	-0.155
MXE	NR1D2	0	-0.245
MXE	HLF	0.000569791	0.143
MXE	CRHR1	9.85899e-06	-0.321
MXE	RNFT1	0.036243	-0.304
MXE	SNX2	0.0089355	-0.104
MXE	CACNA1G	1.63311e-06	-0.264
MXE	PTK2	2.54721e-06	-0.123
MXE	CHTOP	3.43122e-14	0.302
MXE	NXPE3	1.51011e-08	-0.243
MXE	MIEN1	0.000727649	-0.143
MXE	THRA	0	-0.383
MXE	THRA	0	-0.255
MXE	AIG1	1.04195e-07	-0.208
MXE	BAP18	0.000894171	0.187
MXE	BAP18	0.000221172	0.225
MXE	RETREG3	2.52269e-12	0.352
MXE	AARSD1	0.00240901	-0.14
MXE	LCMT1	0	0.301
MXE	ZNF827	2.87902e-09	-0.427
MXE	DNAJB14	0	-0.424
MXE	RBBP7	1.80149e-05	-0.175
MXE	CTIF	0.00178682	-0.13
MXE	GNAI2	0	-0.237
MXE	MAP3K12	1.94305e-08	0.201
MXE	LYNX1	0.00335913	-0.115
MXE	SMAD5	0.000302927	0.424
MXE	PCYT1B	9.09784e-05	-0.234
MXE	FBXO38	0.0296829	0.17
MXE	FBXO38	0.00781469	0.165
MXE	XPO4	0.0191789	0.18
MXE	TCN2	5.90199e-07	-0.25
MXE	TCN2	0.00113513	-0.242
MXE	PPIL6	3.85172e-11	-0.274
MXE	SEC24C	0.00569304	-0.115
MXE	MYT1	3.53324e-06	-0.195
MXE	PPP1R9B	0	0.188
MXE	TMEM183A	0.00161115	0.104
MXE	DYRK4	0.046532	0.186
MXE	LRFN5	0.0111104	-0.159
MXE	GPR37L1	0.0015014	-0.108
MXE	MPP5	0.00470498	-0.393
MXE	MPP5	0.0095444	-0.362
MXE	UBE2T	0	0.389
MXE	WDR47	9.33319e-10	-0.181
MXE	ERI3	3.06557e-06	0.184
MXE	ERI3	0.000158467	0.128
MXE	UCHL5	0	-0.287
MXE	SULF1	0.000641765	0.301
MXE	AHDC1	1.57251e-05	-0.218
MXE	SPARC	4.53875e-06	-0.218
MXE	UNC45B	0.0176331	-0.537
MXE	LENG8	5.31757e-07	0.174
MXE	CACNB4	8.3556e-12	-0.362
MXE	COMMD2	2.64979e-13	-0.249
MXE	SETD6	5.90565e-06	0.196
MXE	CDC42BPA	0.0179139	0.143
MXE	CDC42BPA	0.00670741	0.138
MXE	PLCB4	0.000197438	0.294
MXE	PLCB4	0.04504	-0.124
MXE	GSK3B	3.10106e-09	-0.216
MXE	GSK3B	0.0191789	-0.119
MXE	AKT3	1.86355e-09	0.178
MXE	FAM185A	6.80308e-06	0.461
MXE	GMDS	0.00678676	0.18
MXE	SLC4A10	0.00110488	0.142
MXE	EHBP1	0.00139059	-0.15
MXE	MMTAG2	1.55518e-05	-0.217
MXE	PHF20	0.00706733	-0.165
MXE	MTDH	5.67861e-13	-0.394
MXE	DOCK3	0.00519855	-0.181
MXE	DOCK3	0.00770186	0.132
MXE	DOCK3	0.000221318	0.118
MXE	DOCK3	0.000100826	-0.108
MXE	ZNF532	3.46013e-06	-0.256
MXE	ZMYND11	0	-0.322
MXE	ZMYND11	3.75967e-11	-0.294
MXE	ZMYND11	1.00721e-09	-0.174
MXE	ZZEF1	0.000816393	0.305
MXE	TRAK1	0.000498372	0.162
MXE	CRAMP1	0.00467595	0.235
MXE	RNF13	0.00167841	-0.138
MXE	RNF13	0.00248378	0.166
MXE	RNF13	4.99581e-05	0.148
MXE	RNF13	0.0010634	-0.108
MXE	OPLAH	1.37871e-06	-0.293
MXE	PCMTD1	0.00225761	0.198
MXE	BOP1	1.10664e-07	-0.186
MXE	SMARCD3	3.05864e-05	0.141
MXE	SMARCD3	1.12421e-06	-0.165
MXE	RBPJ	0.00887505	0.39
MXE	NEO1	0.00927851	-0.104
MXE	HASPIN	0.000103302	0.234
MXE	SNX25	0	-0.295
MXE	RALY	8.68942e-12	0.278
MXE	PPP6R2	9.73344e-07	-0.172
MXE	PPP6R2	0.000173364	0.16
MXE	TMEM158	0.0152304	0.19
MXE	APBB2	0.000206408	-0.135
MXE	APBB2	3.0337e-05	-0.288
MXE	QKI	7.14478e-07	0.132
MXE	KHDRBS3	0.0352515	0.103
MXE	ACTN2	0.00461403	0.178
MXE	FASTK	0	-0.312
MXE	ETV1	0.000391582	0.156
MXE	ETV1	1.12736e-05	-0.147
MXE	ETV1	2.10358e-05	-0.12
MXE	ETV1	1.2152e-07	-0.216
MXE	SNAPC1	0.0148935	-0.145
MXE	DNPEP	0.000711555	0.208
MXE	EIF4B	1.08358e-09	-0.164
MXE	RHBDD1	0.000650386	0.395
MXE	MFF	0	-0.136
MXE	MFF	0	-0.238
MXE	MFF	0	-0.155
MXE	DNER	3.36615e-13	-0.204
MXE	CPNE2	1.11666e-06	0.247
MXE	CPNE2	1.41596e-14	0.373
MXE	CPNE2	0.0178909	-0.164
MXE	CHCHD7	5.44319e-07	-0.245
MXE	CHCHD7	0.010943	-0.156
MXE	CHCHD7	0.00180461	-0.162
MXE	NCALD	0	-0.242
MXE	MAP2K5	0.00156309	-0.247
MXE	PRMT7	7.15345e-07	0.253
MXE	LRRFIP1	0.00699128	0.134
MXE	XPO6	0.000480921	-0.147
MXE	TCEA1	2.37984e-07	-0.264
MXE	HDAC4	7.86291e-08	0.322
MXE	GRIPAP1	1.84362e-08	-0.159
MXE	TMEM175	0.0131998	-0.301
MXE	AFAP1	0.0459199	0.21
MXE	TBC1D14	0.00947299	-0.229
MXE	PEX5L	3.31924e-06	0.226
MXE	ACADVL	7.1388e-05	-0.163
MXE	SSBP4	8.67479e-08	0.274
MXE	SSBP4	0	-0.356
MXE	DRAP1	0	0.284
MXE	LARGE1	0.00066662	-0.112
MXE	FOXP1	0.00249189	-0.255
MXE	TBC1D1	0.0107547	0.324
MXE	CCM2	0	-0.418
MXE	PCM1	1.09763e-07	-0.198
MXE	GPR158	1.22435e-09	-0.243
MXE	PAPSS1	2.72059e-07	-0.192
MXE	SLC6A7	1.30034e-11	0.188
MXE	AK4	0.00203911	0.138
MXE	TUBB4A	0	0.208
MXE	HERC3	0.0159924	0.112
MXE	SCD5	0.000121097	-0.113
MXE	SCD5	5.79748e-08	0.141
MXE	HNRNPD	5.33458e-08	-0.117
MXE	REEP2	2.16069e-12	-0.197
MXE	REEP2	0	0.283
MXE	WARS1	3.04065e-08	0.415
MXE	AGFG1	2.52725e-06	-0.182
MXE	PHLDB1	5.00586e-07	0.323
MXE	EML3	0.00665314	0.153
MXE	KDM4A	0.0496859	-0.121
MXE	SMIM14	0	-0.301
MXE	GABRA2	0	-0.313
MXE	GABRA2	0.00431938	-0.195
MXE	SYVN1	0.0262858	0.128
MXE	PARD3	0.01582	0.222
MXE	PSD	0.0239998	-0.119
MXE	ARHGAP12	3.39542e-06	-0.17
MXE	CNOT2	0.00294745	0.119
MXE	PIP4K2A	7.31139e-15	0.321
MXE	USP6NL	0.00301008	-0.282
MXE	KIN	0.000482231	-0.299
MXE	TASOR2	0.00277894	0.162
MXE	TASOR2	2.46825e-05	-0.271
MXE	DPY19L4	7.31139e-15	-0.435
MXE	BCL2L13	1.34382e-09	0.354
MXE	SHTN1	0.00826244	-0.106
MXE	FN3K	0.0069799	-0.121
MXE	METAP1D	0.0328216	-0.158
MXE	FBXL16	2.15769e-05	-0.124
MXE	BBS12	0.040867	-0.153
MXE	LIN7A	0.00160486	0.142
MXE	NAV3	5.0962e-08	-0.362
MXE	SYT1	0	0.274
MXE	RAB31	0.00255928	-0.191
MXE	RAB31	4.64919e-07	-0.187
MXE	OSBPL8	4.6497e-06	-0.198
MXE	MDM2	0.00906448	0.17
MXE	MDM2	0.0229484	0.151
MXE	MON2	0.0241178	0.21
MXE	GRM8	2.64291e-05	-0.335
MXE	GRM8	0.000955375	-0.269
MXE	AJAP1	0.00143292	-0.19
MXE	NT5C2	7.39287e-05	-0.297
MXE	NT5C2	0.00132372	-0.318
MXE	LRRC8A	1.07249e-05	-0.216
MXE	LRRC8A	0.0442628	0.135
MXE	B4GALNT1	0.000112838	0.175
MXE	B4GALNT1	4.4653e-10	0.225
MXE	B4GALNT1	8.20829e-11	0.278
MXE	TFR2	0.000141214	0.16
MXE	R3HDM2	0.000104996	-0.236
MXE	LRP12	0	0.456
MXE	PPP1R1A	7.57134e-09	0.179
MXE	CHCHD3	5.60384e-12	0.337
MXE	PRDM2	0.0143165	-0.176
MXE	BBX	1.38843e-05	-0.341
MXE	INPP4B	0.00328133	0.289
MXE	RPS6KA4	0.000371851	0.169
MXE	RPS6KA4	0.000387351	-0.195
MXE	RPS6KA4	0	-0.503
MXE	RPS6KA4	0	-0.489
MXE	SLC39A9	1.25288e-06	0.22
MXE	DBX2	0.000273839	0.458
MXE	BEGAIN	4.27234e-06	-0.186
MXE	PPFIBP1	0.00599624	0.237
MXE	KRAS	0.000206851	0.154
MXE	PCNX2	0.0406167	-0.178
MXE	CMAS	3.22121e-05	0.116
MXE	CMAS	4.66062e-14	-0.22
MXE	GOLT1B	0.0043202	-0.302
MXE	PI4KB	0.00283383	0.141
MXE	RIPOR1	0.00544585	-0.344
MXE	EMG1	8.71866e-07	0.37
MXE	ATN1	0	-0.208
MXE	ATN1	1.84058e-08	0.129
MXE	ATN1	4.04339e-06	-0.105
MXE	WASHC3	0	0.252
MXE	CHPT1	0	-0.369
MXE	PPP6C	2.94385e-05	-0.199
MXE	PRKCZ	5.19484e-07	-0.125
MXE	LGALS1	0.000661435	0.131
MXE	EIF3L	0.00334796	-0.132
MXE	KIRREL3	0.0141937	0.189
MXE	ZC3H7B	7.42528e-07	0.185
MXE	ZC3H7B	8.99445e-08	-0.121
MXE	PRSS16	0.00117766	-0.216
MXE	GRAMD4	0.000341549	-0.218
MXE	SLC6A9	0.00167397	0.101
MXE	TPP1	1.09174e-12	-0.27
MXE	DENND6B	0.000180946	0.272
MXE	MEAF6	0	-0.288
MXE	PPP1R8	0.0119476	0.12
MXE	UBR3	0.000791358	-0.141
MXE	SHANK3	0.00178659	-0.106
MXE	GATD1	4.02911e-14	-0.24
MXE	MRPL23	0.0432549	-0.18
MXE	KMT5B	0.00201936	0.122
MXE	ST3GAL3	0.0384987	-0.139
MXE	ST3GAL3	0	-0.361
MXE	SLC25A39	0.00637299	-0.148
MXE	SLC25A39	0.0105213	-0.139
MXE	TMEM25	0.000848107	0.26
MXE	DOC2G	0.00091282	-0.29
MXE	PITPNM1	1.73849e-13	0.197
MXE	DPP3	0.0443295	-0.104
MXE	SNX15	0.001728	-0.186
MXE	CNEP1R1	0.000180316	0.102
MXE	NUDT22	0.000952562	0.284
MXE	NUDT22	0.0226701	0.22
MXE	RTN3	0	0.234
MXE	TUSC3	1.68282e-05	0.142
MXE	TUSC3	4.46931e-05	0.169
MXE	DCTN3	0	-0.217
MXE	FADS2	1.45311e-06	-0.132
MXE	FADS1	7.1262e-05	-0.143
MXE	SHF	0.0389968	-0.259
MXE	SHF	0.014987	-0.186
MXE	SHF	0.0083178	-0.142
MXE	SHF	0.0174793	-0.104
MXE	SHF	0.00468942	-0.138
MXE	ETHE1	0.000956838	0.167
MXE	ETHE1	0.00016279	0.238
MXE	COQ6	0.0159933	-0.208
MXE	TP53I11	4.15018e-07	-0.171
MXE	EXT2	0.000211552	0.204
MXE	EXT2	0.000111558	0.211
MXE	TPM2	0.00336379	-0.264
MXE	PRR5L	0.0469882	-0.261
MXE	PRR5L	0.00845067	-0.455
MXE	PAMR1	0.00726499	-0.158
MXE	ANO5	0.00659083	0.253
MXE	PCLO	6.25124e-05	0.188
MXE	CADM1	0.0365588	0.115
MXE	CADM1	0.00156309	-0.14
MXE	ARNTL	0.00363622	0.147
MXE	ARNTL	0.0273841	-0.163
MXE	EPS8	0.0465069	-0.149
MXE	TUB	0.0328758	0.123
MXE	ALDH4A1	0.000791586	0.306
MXE	APBB1	3.69378e-05	-0.113
MXE	CLPB	0.0169121	-0.175
MXE	GPD2	5.325e-05	-0.157
MXE	PICALM	1.33319e-05	0.259
MXE	PICALM	9.55057e-08	0.172
MXE	HIKESHI	2.08487e-07	-0.167
MXE	CTNND2	9.29895e-05	0.131
MXE	MTMR2	0.0135987	0.245
MXE	CEP126	0.000613513	0.342
MXE	CEP164	0.0204632	0.13
MXE	HYOU1	0.00124306	-0.11
MXE	ABCG4	0.00883254	0.194
MXE	NLRX1	0.00913212	-0.182
MXE	DDHD1	2.04493e-07	-0.254
MXE	ARHGEF12	0.00424895	-0.134
MXE	EXOC2	9.11063e-11	-0.291
MXE	WRNIP1	1.41596e-14	0.272
MXE	WRNIP1	1.13958e-06	0.204
MXE	HNRNPM	5.99725e-05	-0.145
MXE	HNRNPM	0	0.209
MXE	HNRNPM	1.04809e-11	0.162
MXE	GABBR2	0.000953637	0.111
MXE	GMPR	0.0011219	-0.153
MXE	MTX3	0.0431327	0.204
MXE	TM2D3	0	0.361
MXE	FNBP1L	0.00553086	0.318
MXE	VRK3	1.10364e-05	-0.142
MXE	VRK3	0	-0.374
MXE	VRK3	7.11915e-06	-0.221
MXE	ADGRL2	0.0040513	0.221
MXE	NCOA1	1.17372e-08	0.191
MXE	LRRC7	0.032302	0.148
MXE	LRRC7	0.0301308	0.178
MXE	LRRC7	2.19414e-06	0.307
MXE	MPPED2	0.00228982	0.181
MXE	PATJ	0.0432659	-0.157
MXE	TM2D1	1.41596e-14	0.296
MXE	DAB1	0.000257096	-0.166
MXE	DAB1	2.07379e-06	0.275
MXE	YIPF1	6.25124e-05	0.21
MXE	ELAVL4	1.06385e-08	-0.257
MXE	ELAVL4	3.06557e-06	0.142
MXE	BEND5	0.00892768	0.259
MXE	RAP1GAP2	0.0439259	-0.101
MXE	PRRC2A	0.00158577	0.124
MXE	MDGA2	0.0225694	-0.206
MXE	FOXJ3	5.06679e-07	0.248
MXE	RIMS3	9.25208e-06	-0.189
MXE	MTA3	0.000607571	-0.165
MXE	ZMPSTE24	2.52049e-12	0.29
MXE	ZDHHC9	0.00388616	-0.176
MXE	THAP3	0.0126643	0.226
MXE	NCDN	1.10513e-12	-0.152
MXE	SRC	4.04314e-10	-0.363
MXE	SNRPN	0	-0.196
MXE	SRGAP2	0.00806166	-0.137
MXE	SRGAP2	0.00182358	-0.129
MXE	SRGAP2	3.601e-07	0.171
MXE	SRGAP2	6.80308e-06	0.183
MXE	SRGAP2	4.33024e-05	0.209
MXE	KDM1A	0.0150645	0.196
MXE	MAP2K4	3.49022e-10	0.253
MXE	MAP2K4	1.69245e-05	0.258
MXE	COL27A1	0.0135657	0.156
MXE	COL27A1	0.00750406	0.137
MXE	RAP1GAP	0.00739499	-0.102
MXE	SH2D5	0.000151604	0.32
MXE	HP1BP3	0.00111782	-0.148
MXE	TMEM14C	0.0408667	-0.107
MXE	TMEM14C	2.31414e-05	-0.152
MXE	IGSF21	0.0183624	-0.113
MXE	IGSF21	0.0120703	-0.118
MXE	ATP13A2	1.01064e-06	-0.184
MXE	FHAD1	0.0425263	-0.325
MXE	PLOD1	0.000786923	0.201
MXE	MAD2L2	9.965e-06	-0.179
MXE	PEX14	0.0299113	-0.125
MXE	ZNF280D	0.000237591	-0.241
MXE	SLC1A2	0	-0.233
MXE	MLF2	0	-0.312
MXE	NADK	3.09739e-05	-0.273
MXE	NADK	7.31139e-15	0.309
MXE	NPDC1	0	0.185
MXE	NPDC1	0	0.251
MXE	NPDC1	0	0.251
MXE	SPPL2B	0.0255757	-0.135
MXE	PFKL	0.000643585	-0.179
MXE	TMEM141	0.000850571	-0.267
MXE	TMEM141	1.25158e-06	-0.346
MXE	GTF3C4	3.33789e-11	0.335
MXE	CAMK4	0.0116053	0.136
MXE	FUBP3	0.0295654	0.189
MXE	TOR1B	0.000822814	0.152
MXE	PTPA	0.00152504	-0.126
MXE	SH3GLB2	0.00149132	-0.16
MXE	TRUB2	1.05662e-06	0.267
MXE	GOLGA2	2.45436e-07	-0.318
MXE	MVB12B	0.00193943	-0.183
MXE	PBX3	7.31139e-15	-0.269
MXE	GARNL3	0	-0.341
MXE	GARNL3	2.92387e-05	-0.202
MXE	SAE1	0.00229823	-0.143
MXE	SAE1	7.31139e-15	-0.26
MXE	SH3BP5	0.000581449	-0.163
MXE	SH3BP5	0	-0.41
MXE	DENND1A	0.000229174	-0.222
MXE	DENND1A	0.00108395	-0.223
MXE	DENND1A	0.0253439	-0.127
MXE	RBM18	0.00249189	-0.144
MXE	C9ORF43	0.0210648	-0.319
MXE	C9ORF43	0.00458322	0.446
MXE	C9ORF43	0.0137369	0.393
MXE	PTCD2	2.64123e-07	0.265
MXE	AKAP2	0.00179972	0.121
MXE	AKAP2	1.4993e-08	-0.286
MXE	OGT	7.27941e-07	0.15
MXE	MIB2	0.0174145	0.106
MXE	MIB2	1.44965e-05	-0.111
MXE	PRDX5	0	0.241
MXE	PRDX5	7.05686e-05	0.104
MXE	NDUFB6	0	0.344
MXE	GRIA2	7.41354e-08	0.166
MXE	GLMN	0.00726607	0.211
MXE	STK25	0	-0.199
MXE	ADPGK	0.0345214	0.175
MXE	ADPGK	0.0050527	0.22
MXE	ERMP1	0.0234014	-0.194
MXE	PTPRD	0.0425193	0.159
MXE	NFIB	0.000685761	0.292
MXE	NFIB	0.0227143	0.266
MXE	NFIB	0.0401035	-0.176
MXE	CYRIB	1.12422e-12	0.272
MXE	CYRIB	0.000221318	0.12
MXE	CYRIB	0.000372683	0.123
MXE	CYRIB	0.00362455	-0.175
MXE	CYRIB	0.0110965	-0.175
MXE	ZNF782	0.000786923	-0.283
MXE	ZNF782	0.00142756	0.252
MXE	IARS1	0.0133136	0.153
MXE	SPARCL1	1.27263e-06	-0.102
MXE	FRMPD3	0.0102839	-0.325
MXE	CCNI	0	-0.258
MXE	KATNAL1	0.00813851	-0.325
MXE	KATNAL1	4.69014e-09	0.247
MXE	RWDD1	8.06387e-08	-0.18
MXE	TRPC4	0.000102578	0.395
MXE	TRPC4	0.000446453	0.403
MXE	ZC3H13	6.00564e-05	0.26
MXE	CAB39L	9.03902e-10	-0.195
MXE	TRAPPC11	0.0464771	-0.154
MXE	PLEKHA6	0.00236251	0.19
MXE	PLEKHA6	3.60779e-06	0.255
MXE	PLEKHA6	8.48454e-06	0.137
MXE	PLEKHA6	0.000338774	0.263
MXE	SV2B	6.74651e-06	-0.136
MXE	TRMT9B	0.0420865	-0.421
MXE	PPP2CB	0	-0.266
MXE	PPP2CB	2.61891e-06	0.116
MXE	LSM1	2.95935e-05	0.283
MXE	TIMP4	0.0342915	0.115
MXE	RHOT2	5.16682e-05	0.184
MXE	ARHGEF7	0.000417789	-0.189
MXE	PCNX4	0.0140137	-0.214
MXE	UBAC2	2.78158e-14	-0.368
MXE	RBM26	0.00253708	0.191
MXE	MYCBP2	0.0439796	0.107
MXE	LMO7	0.0282102	-0.205
MXE	ANO4	0.0174464	0.215
MXE	CAMK2D	0	0.296
MXE	CAMK2D	0.0279445	0.116
MXE	CAMK2D	0	0.253
MXE	NDST4	0.0106507	0.115
MXE	MYO3A	0.000258447	-0.107
MXE	APC2	0.00215693	-0.213
MXE	PSMB7	8.68965e-10	-0.151
MXE	HSPA4L	6.00386e-06	0.154
MXE	SAFB2	0.00277057	-0.114
MXE	UBE2W	1.11292e-13	0.329
MXE	UBE2W	0.00518057	0.135
MXE	ELP3	9.13914e-06	-0.211
MXE	CCDC25	6.0805e-11	0.263
MXE	MSRA	0.000933429	-0.119
MXE	TMEM62	0.00406524	-0.191
MXE	TMEM62	7.6071e-06	-0.267
MXE	TRIM9	2.71013e-07	0.169
MXE	SPOCK3	0.00140001	0.208
MXE	PRKCSH	1.73849e-13	0.236
MXE	SCG5	0	0.359
MXE	SCG5	0	0.316
MXE	QTRT1	0.00120585	-0.309
MXE	PIGT	2.84677e-08	0.222
MXE	SORBS3	5.90547e-06	-0.228
MXE	FAM160B2	0.0224522	-0.152
MXE	ATP6V1B2	0	0.231
MXE	SORBS2	0.00188699	-0.337
MXE	SORBS2	0.020018	-0.299
MXE	DHPS	2.972e-06	-0.139
MXE	BRD4	2.4029e-09	-0.189
MXE	COPE	1.41596e-14	0.207
MXE	NCAN	5.09101e-09	0.204
MXE	LRRC8B	0.0249496	-0.109
MXE	LRRC8B	0.000100784	-0.53
MXE	CRTC1	0.0278092	0.118
MXE	AP3S1	1.73414e-11	0.302
MXE	AP3S1	0	-0.242
MXE	STXBP1	8.15465e-09	-0.11
MXE	RASGRF2	1.01137e-11	0.286
MXE	MED23	0.0121404	-0.303
MXE	HNRNPLL	4.10366e-11	0.465
MXE	CELF5	0.00736325	-0.176
MXE	CELF5	0.0176155	-0.152
MXE	NFIC	1.96168e-07	-0.225
MXE	SGTA	1.85285e-08	-0.178
MXE	MICU3	5.33515e-10	0.22
MXE	ZNF142	5.37615e-09	0.402
MXE	DAZAP1	0.00443105	0.19
MXE	OARD1	1.02466e-07	-0.182
MXE	RASGEF1A	5.636e-12	0.262
MXE	RASSF4	0.0273841	0.153
MXE	RASSF4	0.00273521	0.145
MXE	RPP30	0.000416972	-0.357
MXE	GRID1	0.0401096	0.131
MXE	GRID1	0.0103578	-0.101
MXE	TMEM63B	0.00102753	0.164
MXE	STN1	0.000332608	-0.222
MXE	SAMD8	0.0138712	-0.165
MXE	USP54	0.00059407	-0.112
MXE	USP54	0.00117043	-0.11
MXE	USP54	5.96684e-14	-0.357
MXE	PPP3CB	0	0.239
MXE	MCTP1	0.000101979	-0.229
MXE	HK1	0.000442314	0.102
MXE	DNAJC12	0.000285099	0.199
MXE	PPP2R1B	2.98792e-07	-0.4
MXE	RNLS	1.51483e-05	0.597
MXE	RALGAPB	1.76881e-07	0.255
MXE	POLR2F	5.22895e-05	-0.162
MXE	NECAB1	0	-0.288
MXE	SORBS1	0.00182656	0.16
MXE	SORBS1	0.00864872	-0.208
MXE	SORBS1	0.013044	-0.253
MXE	LCOR	0.0449078	-0.377
MXE	SEPTIN5	0	0.189
MXE	NRXN3	0	-0.265
MXE	NRXN3	7.31139e-15	-0.259
MXE	BTRC	0.00231694	0.169
MXE	BTRC	0.00576695	0.129
MXE	BTRC	3.61264e-07	0.249
MXE	BTRC	0.000387351	0.171
MXE	MPP2	6.35717e-05	-0.22
MXE	OGA	5.60384e-12	0.254
MXE	PAPOLA	6.30004e-10	-0.288
MXE	TCF7L2	1.37564e-07	-0.286
MXE	TCF7L2	0.00167247	-0.177
MXE	TCF7L2	4.4525e-10	-0.367
MXE	TCF7L2	0.000420053	-0.276
MXE	UNC79	0.00813817	-0.131
MXE	ABLIM1	5.40139e-07	-0.248
MXE	TEX264	2.38723e-07	0.248
MXE	GRK5	0.0102679	-0.161
MXE	ZRANB1	7.01271e-06	-0.172
MXE	TCERG1L	0.0160623	0.161
MXE	RIC8B	0.00296096	0.183
MXE	TMEM121	0.0075634	-0.15
MXE	ADARB1	3.07028e-05	0.148
MXE	ADARB1	0.00182428	0.136
MXE	ADARB1	0.00119501	0.111
MXE	SYT5	8.68582e-13	-0.197
MXE	CALB2	0	0.301
MXE	MARK3	0.0220409	-0.142
MXE	CEP170B	1.55933e-06	-0.23
MXE	PPP4R4	0.00114664	-0.168
MXE	PPP4R4	0.0157979	-0.128
MXE	IFI27	5.21755e-09	-0.267
MXE	CASP3	0.0067709	-0.169
MXE	TXNL4A	0.0069799	-0.251
MXE	RNF181	0.00392441	0.102
MXE	SPATA7	0.00367483	0.279
MXE	KCNK10	0.00117703	-0.48
MXE	KCNK10	6.70175e-05	-0.436
MXE	TMEM63C	0.000168517	-0.154
MXE	ANKHD1	0.00705062	0.176
MXE	CTBP2	0.000122094	-0.226
MXE	NUMB	0.000677193	0.132
MXE	ATP6V1D	3.3483e-05	-0.128
MXE	EPC2	1.08283e-07	0.281
MXE	NIN	0.003426	-0.165
MXE	CBX7	0	-0.228
MXE	CBX7	0	-0.229
MXE	CBX7	0.000995179	-0.162
MXE	PPIB	2.78158e-14	-0.209
MXE	GTF2A2	3.18011e-12	0.297
MXE	C16ORF70	0.0109159	0.188
MXE	LANCL2	4.19689e-07	0.171
MXE	NEDD4	1.52584e-05	-0.468
MXE	NEDD4L	5.10938e-09	0.224
MXE	NEDD4L	0	0.292
MXE	NEDD4L	0.0185149	0.183
MXE	MAP1A	5.03352e-13	0.171
MXE	MAP1A	0	0.249
MXE	MAP1A	0	0.248
MXE	TTBK2	2.58016e-06	-0.216
MXE	ZNF106	0.0137369	0.121
MXE	ZNF106	0.0028741	-0.147
[truncated: 1,941 more rows]

## Sheet: Liver
Type	GeneID	FDR	IncLevelDifference
A3SS	ABCG8	5.56523e-05	-0.329
A3SS	PPM1B	4.65633e-11	-0.201
A3SS	SFXN1	0.0278623	-0.107
A3SS	DELE1	0.000204882	0.245
A3SS	AMOTL2	0.000465417	0.328
A3SS	ACSM5	0	-0.136
A3SS	REX1BD	1.24554e-05	-0.535
A3SS	SRRM2	3.26959e-08	-0.328
A3SS	SRRM2	0	-0.262
A3SS	SRRM2	0	-0.27
A3SS	USP7	4.75948e-09	-0.189
A3SS	PALB2	0.00119625	-0.429
A3SS	BCOR	0.00357674	0.345
A3SS	MED13L	0.0381283	-0.108
A3SS	IFI27L1	0.00618147	-0.292
A3SS	YPEL1	0.00472081	-0.456
A3SS	ERICH1	0.0357344	-0.256
A3SS	KNG1	0.0263985	-0.203
A3SS	KNG1	0.000366607	-0.236
A3SS	RCL1	0	0.185
A3SS	RCL1	0	0.163
A3SS	SLC38A4	0.00104948	-0.361
A3SS	PTBP2	0.00544565	-0.413
A3SS	CIART	2.52591e-05	0.217
A3SS	SRSF6	6.27367e-08	-0.425
A3SS	NDRG2	0.0153029	0.173
A3SS	ST3GAL4	0.000247727	0.117
A3SS	MBD1	0.0140649	-0.448
A3SS	MBD1	0.0267267	-0.335
A3SS	CRIP3	0.00364482	0.137
A3SS	PLEKHH3	0.000153856	0.225
A3SS	PFKFB1	0.0121814	-0.45
A3SS	SLC30A10	2.49221e-05	-0.614
A3SS	TARBP1	0.0472415	-0.408
A3SS	TLK2	0.0247276	0.112
A3SS	ATP6V0A1	0.000153548	0.314
A3SS	RPL22L1	7.53418e-07	0.161
A3SS	IRAK2	0.0110196	-0.513
A3SS	CCNL2	2.30394e-05	-0.337
A3SS	C19ORF47	0.0206175	0.277
A3SS	SLC4A2	6.38163e-05	-0.158
A3SS	FMR1	0.00467084	-0.17
A3SS	RCN3	0.0138349	0.162
A3SS	THOC5	4.22066e-08	-0.131
A3SS	NCOA6	0.000877375	-0.293
A3SS	ARFIP1	0.00206353	-0.168
A3SS	ESD	0.00341748	-0.139
A3SS	SLC35C2	0.0163333	0.123
A3SS	TAF9	0.000118949	0.358
A3SS	SNRNP70	7.34546e-10	-0.328
A3SS	CAMTA2	0.00301249	-0.114
A3SS	TFG	0.00215637	-0.106
A3SS	TMEM104	0.0339324	-0.104
A3SS	CLK2	4.979e-05	-0.353
A3SS	FDPS	0.013492	0.135
A3SS	RBM39	0.00379011	-0.346
A3SS	RBM39	0.000170709	-0.393
A3SS	PARP3	0.0270867	0.139
A3SS	DAB2	0	-0.418
A3SS	RETREG3	0.00451762	-0.155
A3SS	TSPYL2	0.0388905	-0.332
A3SS	CXADR	0	-0.425
A3SS	LIN54	0.00377337	-0.28
A3SS	PCGF3	1.78807e-06	0.181
A3SS	FGFR3	9.3645e-05	-0.432
A3SS	LDB2	0.0338808	-0.271
A3SS	SULT1D1	0.000707597	-0.142
A3SS	CLOCK	0.0017884	0.184
A3SS	ITIH2	0.000537058	-0.292
A3SS	NDUFA9	0.000318152	0.153
A3SS	TNS2	0.0347435	-0.206
A3SS	KDM8	0.0217457	-0.177
A3SS	IKBIP	0.00184483	-0.324
A3SS	TENT4B	0.0379918	-0.143
A3SS	CYP1A2	1.16953e-05	-0.217
A3SS	OSBPL5	0.00388984	-0.26
A3SS	CHKA	0.00200346	-0.172
A3SS	ABCC5	0.0187655	-0.325
A3SS	ZNRD2	0.000144033	0.158
A3SS	CTNND1	0.00602694	-0.303
A3SS	CTNND1	0.0175138	-0.148
A3SS	PACSIN3	5.12391e-05	-0.111
A3SS	UBR4	0.00887168	-0.104
A3SS	PAXX	0.0151167	0.105
A3SS	SERPINA5	1.69327e-06	0.142
A3SS	IL1RN	0.000179656	0.228
A3SS	EIF4G3	0.0326327	0.276
A3SS	ARHGEF18	0.00656988	-0.316
A3SS	HNRNPA1	2.67718e-07	0.243
A3SS	MTG1	0.0393857	-0.292
A3SS	KLC1	0.000749063	0.306
A3SS	SRSF5	0.000433504	-0.161
A3SS	MTSS2	0.000334847	-0.434
A3SS	BRD9	0.000768212	-0.265
A3SS	BRD9	0.0012267	-0.133
A3SS	NEIL1	0.0482876	0.335
A3SS	HACE1	0.00312307	-0.145
A3SS	PARK7	8.07691e-08	-0.245
A3SS	CILK1	0.0142317	0.436
A3SS	TREX2	0.0270576	0.123
A3SS	SLC26A8	0.0181125	-0.38
A3SS	CFB	0	0.246
A3SS	SLC5A6	2.37463e-06	0.12
A3SS	SF3B1	0.0354464	-0.282
A3SS	PRPF40A	6.72745e-05	0.272
A3SS	COL18A1	0.000247019	-0.468
A3SS	COL18A1	4.55544e-05	-0.398
A3SS	CBR1	0.0218962	0.284
A3SS	PLD3	0.0431597	0.173
A3SS	PAH	8.91206e-05	-0.446
A3SS	HIGD1A	0.000107884	-0.365
A3SS	CYP2D17	0	-0.243
A3SS	CYP2D17	0	-0.253
A3SS	CYP2D17	0	-0.276
A3SS	CYP2D17	6.01217e-14	-0.3
A3SS	GSTZ1	0.0161211	-0.348
A3SS	HPD	5.71749e-06	-0.477
A3SS	KNG1	0	0.304
A3SS	ABHD4	0.000184476	-0.173
A3SS	COPS2	0.000131982	0.232
A3SS	SLC38A4	4.82383e-07	-0.373
A3SS	SLC38A4	8.4723e-07	-0.368
A3SS	GLT1D1	5.9176e-09	-0.171
A3SS	NOSTRIN	0.0462096	0.117
A3SS	ASGR2	0.00993506	-0.129
A3SS	NDRG2	0	-0.137
A3SS	NDRG2	0	-0.114
A3SS	NDRG2	0	-0.116
A3SS	NDRG2	2.44808e-05	-0.45
A3SS	SULT1A1	0.0220615	-0.298
A3SS	F13B	4.37543e-10	-0.442
A3SS	IDH3G	0.0127357	-0.12
A3SS	HPX	0	-0.11
A3SS	HPX	6.01217e-14	-0.556
A3SS	HPX	6.01217e-14	-0.558
A3SS	HPX	0	-0.571
A3SS	HPX	0.000723353	0.19
A3SS	C2CD2L	0.0127357	0.11
A3SS	SNRNP70	3.66148e-07	0.129
A3SS	ASGR1	0.00115986	-0.216
A3SS	ECI2	0.0201718	-0.438
A3SS	APOC1	0.00027602	-0.125
A3SS	ITIH4	1.26479e-05	-0.588
A3SS	ITIH4	2.88939e-09	-0.73
A3SS	ITIH4	3.47613e-13	-0.198
A3SS	ITIH4	0	-0.48
A3SS	ITIH4	0.000467176	-0.198
A3SS	ITIH4	0.000343877	-0.196
A3SS	ITIH4	1.41793e-05	-0.106
A3SS	PIPOX	0	-0.224
A3SS	VEGFB	0.00586414	-0.204
A3SS	PON2	7.99253e-05	-0.179
A3SS	TF	0	-0.25
A3SS	TF	0	-0.152
A3SS	PDLIM5	0.0379937	0.328
A3SS	REN	1.08504e-05	0.152
A3SS	REN	5.13118e-05	0.134
A3SS	REN	7.39068e-09	0.121
A3SS	ITIH2	0.000464989	-0.305
A3SS	NDUFA9	0.000563956	0.122
A3SS	TNS2	0.000695869	-0.243
A3SS	ARF3	0.0239229	-0.159
A3SS	HAL	2.35797e-10	-0.445
A3SS	NXF1	1.44546e-05	-0.441
A3SS	NXF1	0.0284631	-0.335
A3SS	KIF1C	0.0292786	-0.12
A3SS	KIF1C	0.0178295	-0.137
A3SS	GLS2	0.0303906	-0.375
A3SS	ZNF259	6.01217e-14	-0.118
A3SS	APOC3	0.000144033	-0.206
A3SS	HYI	0.0218985	-0.111
A3SS	SLC30A2	0.00339948	0.217
A3SS	PZP	0.0352572	-0.367
A3SS	PAXX	0.00351216	0.114
A3SS	IL1RN	0.000167104	0.229
A3SS	CYP2C21	0.000119567	0.213
A3SS	PROZ	0	-0.148
A3SS	FGG	0	-0.611
A3SS	FGG	0	-0.587
A3SS	FGG	0	-0.514
A3SS	SHFL	0.00127868	0.102
A3SS	NOXO1	0.0303906	0.254
A3SS	MTA1	0.000346027	0.444
A3SS	SERPINA13P	0.0168374	-0.128
A3SS	SERPINA13P	0.00874772	-0.143
A3SS	SERPINA1	3.26959e-08	0.333
A3SS	ASL	0.0106605	-0.207
A3SS	SULT3A1	9.72109e-08	0.361
A3SS	SULT3A1	0.00399319	0.211
A5SS	PRPF38B	0.0100848	-0.254
A5SS	MIER1	0.0194171	-0.185
A5SS	GLI4	6.89812e-05	0.189
A5SS	PLD3	3.13409e-05	0.228
A5SS	JMJD4	0.00208831	-0.277
A5SS	UBE2E3	0.0125691	-0.198
A5SS	RABGEF1	0.00237335	0.112
A5SS	CYP2C18	5.26317e-08	-0.201
A5SS	PHAX	0.0016323	-0.262
A5SS	ANAPC13	0.0445191	-0.286
A5SS	IGSF9	0.0321745	-0.313
A5SS	HSF2BP	0.0478181	-0.429
A5SS	CYCS	0	0.101
A5SS	C1ORF210	0.00285625	-0.268
A5SS	SLC19A1	0.0495676	-0.117
A5SS	CPEB3	0.0434352	0.154
A5SS	SRSF6	2.38577e-05	-0.423
A5SS	TLCD2	0.000834196	0.215
A5SS	PTBP1	6.21528e-07	-0.13
A5SS	CRK	1.00119e-05	0.322
A5SS	MME	0.0289131	-0.525
A5SS	FAM3C	0.0024013	-0.158
A5SS	HGFAC	0	-0.121
A5SS	HNRNPH3	0.0415951	-0.221
A5SS	CRIP3	1.08852e-11	0.226
A5SS	SEMA4G	0.000113545	-0.259
A5SS	GNE	0.000269574	-0.264
A5SS	CLASRP	0.0156489	0.349
A5SS	CYP4F3	1.99676e-07	-0.36
A5SS	ASH1L	0.00228587	0.141
A5SS	CYTH2	0.027856	-0.115
A5SS	EXOC1	4.93804e-08	0.606
A5SS	ARL6IP4	0.0317007	-0.446
A5SS	ZNF276	0.0295611	0.317
A5SS	HNRNPA2B1	4.22731e-06	0.29
A5SS	NIT1	0.000904828	-0.413
A5SS	NIT1	0.00388332	-0.355
A5SS	KLHL12	0.0181118	0.12
A5SS	JUP	0.000373068	0.157
A5SS	SEC11A	0.000321608	-0.295
A5SS	ATP8B3	1.13473e-06	0.15
A5SS	TRIO	0.0464291	-0.232
A5SS	ITIH4	9.37969e-08	0.186
A5SS	AURKAIP1	0.000191378	0.233
A5SS	AURKAIP1	9.02671e-05	0.248
A5SS	AURKAIP1	0.00104629	0.241
A5SS	RPL34	1.08729e-08	-0.125
A5SS	WSB1	0.00181417	-0.3
A5SS	MCRIP1	0.000257232	0.22
A5SS	NAA35	0.00884275	0.114
A5SS	NFE2L1	4.83706e-06	-0.114
A5SS	ZMYND11	0.0276402	-0.209
A5SS	TRIP12	0.00574309	-0.306
A5SS	PCGF3	0.000877891	-0.383
A5SS	SLC2A9	0.0316405	0.162
A5SS	SEC31A	0.0289852	0.191
A5SS	SEC31A	0.00604594	0.231
A5SS	ABCB4	0.00601967	-0.308
A5SS	ARGLU1	3.67699e-07	-0.178
A5SS	TSNAX	0.00741192	-0.372
A5SS	TNFAIP3	0.0135561	-0.224
A5SS	CHPT1	3.9591e-10	0.376
A5SS	TXNRD1	0.00347552	0.145
A5SS	TXNRD1	1.67362e-06	0.118
A5SS	TXNRD1	2.95426e-06	0.128
A5SS	NFATC1	0.0197188	-0.132
A5SS	TMEM242	0.027498	0.263
A5SS	TMEM242	0.010576	0.282
A5SS	C11ORF24	1.2783e-13	-0.118
A5SS	AKAP8L	4.10167e-12	-0.262
A5SS	SCMH1	0.00335955	-0.115
A5SS	ST6GALNAC2	0.000857273	-0.166
A5SS	YAP1	0.0485651	0.209
A5SS	GLS2	2.19635e-12	-0.484
A5SS	DDX6	0.0062103	-0.553
A5SS	RNPS1	0.0328177	0.135
A5SS	FBXW5	1.69868e-08	-0.481
A5SS	STK25	0.0351194	-0.323
A5SS	FBH1	0.00724476	-0.546
A5SS	ENTPD8	0.00187438	0.141
A5SS	SRSF11	6.17264e-07	-0.438
A5SS	SRSF11	0.0351194	-0.202
A5SS	PROZ	0	-0.204
A5SS	NAXD	1.26937e-09	0.407
A5SS	ELOF1	0.000321117	0.353
A5SS	CDK16	0.00337991	-0.213
A5SS	STK11	0.0122475	-0.105
A5SS	MRTFA	0.0493609	-0.208
A5SS	NNT	0.00922047	-0.363
A5SS	HNRNPC	7.40641e-05	0.108
A5SS	MOCS2	0.0177147	-0.121
A5SS	MOCS2	0.0112369	-0.152
A5SS	MTRES1	0.000229379	0.428
A5SS	PARK7	0.0338028	-0.17
A5SS	CDO1	0.0291976	-0.262
A5SS	HAGH	0.0141389	0.106
A5SS	NECAP1	0.0316405	-0.468
A5SS	ABHD4	0.0352348	-0.21
A5SS	CDC42EP1	0.00360185	-0.415
A5SS	HGFAC	0	-0.104
A5SS	STAT1	0.000321608	0.151
A5SS	APOE	1.72323e-08	0.393
A5SS	APOE	0	0.499
A5SS	CCNL2	0.0303497	-0.41
A5SS	CCNL2	0.0122475	-0.386
A5SS	ARG1	0.0243826	-0.172
A5SS	HPX	0	-0.385
A5SS	HPX	5.33817e-12	-0.296
A5SS	NIT1	0.000112748	-0.422
A5SS	MRPL11	0.0200021	0.149
A5SS	LUC7L3	8.2778e-10	-0.183
A5SS	NUB1	0.0129783	-0.176
A5SS	RGS14	0.00510608	-0.477
A5SS	SNRNP70	0.0446861	-0.203
A5SS	ASGR1	6.64018e-06	0.236
A5SS	APOC1	1.3266e-05	-0.113
A5SS	APOC1	1.3266e-05	-0.113
A5SS	RBIS	4.09455e-09	0.249
A5SS	ITIH4	0.000391356	-0.252
A5SS	AURKAIP1	1.70442e-05	0.245
A5SS	P4HB	0.00232426	0.105
A5SS	HYAL1	0.0135035	0.125
A5SS	TF	1.09568e-12	-0.192
A5SS	UBE2D3	0.000393982	-0.126
A5SS	TXNRD1	3.96988e-06	0.105
A5SS	NDUFS8	0.0160344	0.256
A5SS	APOA1	0	-0.526
A5SS	APOA1	4.31426e-12	0.713
A5SS	NCDN	0.00236226	-0.379
A5SS	NCDN	0.0379131	-0.315
A5SS	PZP	5.5971e-07	-0.131
A5SS	PPP1R11	1.70442e-05	0.284
A5SS	ELOF1	0.00574829	-0.257
A5SS	COMMD6	0.000385084	0.258
A5SS	TXLNA	0.0168636	-0.162
A5SS	MOCS2	0.0137595	-0.156
MXE	LAPTM4A	8.23979e-11	-0.171
MXE	RAB10	0.00528087	0.11
MXE	ATRAID	0.00226731	0.27
MXE	MEMO1	0.000863683	0.337
MXE	HAAO	1.62108e-08	-0.123
MXE	USP34	1.62463e-08	-0.401
MXE	AFTPH	0.0357146	-0.177
MXE	PCYOX1	0.00216904	0.11
MXE	SUCLG1	5.18111e-11	0.149
MXE	TXNDC9	0.000153473	-0.202
MXE	MTX2	0.00585468	0.162
MXE	SP3	0.000130269	-0.202
MXE	KYNU	0.000654466	-0.278
MXE	CTSF	0.000189314	0.139
MXE	SLC38A3	2.48915e-07	0.136
MXE	NIT2	0.0410431	0.126
MXE	NIT2	0.000316515	0.187
MXE	NIT2	0.00203841	0.138
MXE	CD47	3.55882e-06	0.149
MXE	LRRC58	0.00312616	0.227
MXE	SEC22A	0.0179395	0.191
MXE	ATP13A3	6.65113e-08	-0.327
MXE	RWDD3	0.0206446	-0.28
MXE	IL1RAP	0.0378868	0.116
MXE	ATAD1	0	-0.247
MXE	TC2N	3.27565e-05	-0.135
MXE	TC2N	4.1748e-10	-0.16
MXE	TC2N	0	0.257
MXE	COL18A1	0	0.282
MXE	COL18A1	0	0.268
MXE	HNMT	0	-0.313
MXE	GRID2IP	1.15217e-06	-0.119
MXE	CREBRF	4.87882e-05	0.529
MXE	KIAA1191	5.3423e-15	0.102
MXE	KIAA1191	0.000367246	-0.141
MXE	KIAA1191	0.000469156	-0.123
MXE	KIAA1191	6.90716e-05	-0.134
MXE	KMO	7.67601e-05	-0.12
MXE	RNF130	0.0141049	0.139
MXE	RNF130	0	0.296
MXE	SLC25A48	0.00168884	-0.249
MXE	BIN1	0.00612478	-0.258
MXE	ITIH1	4.84705e-10	0.15
MXE	C4A	6.07471e-14	0.143
MXE	C4A	2.18127e-13	0.148
MXE	C4A	0	0.236
MXE	TRPC4AP	6.33354e-05	0.292
MXE	TPD52L1	0.0168823	0.125
MXE	MRAS	0.0424031	0.127
MXE	ACAD11	2.69973e-05	0.147
MXE	ACP1	0.0320544	0.124
MXE	GC	0	0.338
MXE	GC	0	0.211
MXE	MS4A6A	0.00220791	0.195
MXE	MS4A6A	2.92489e-05	0.19
MXE	ALDH1A1	0	0.391
MXE	PROS1	5.82667e-11	-0.136
MXE	PROS1	5.43438e-10	0.158
MXE	HSD3B7	4.02744e-07	-0.155
MXE	DECR2	0.0261286	-0.135
MXE	NET1	0.00107092	-0.162
MXE	UPP2	1.84626e-09	0.185
MXE	COPZ2	0.0129502	0.156
MXE	COPZ2	5.49545e-05	0.243
MXE	COPZ2	0.000111546	0.202
MXE	CD302	0	0.258
MXE	GSTZ1	4.15097e-06	0.103
MXE	FBXW8	0.00370513	-0.339
MXE	ADK	1.76315e-12	0.155
MXE	ZFAND2A	0	0.259
MXE	GAS2L1	0.0349295	-0.17
MXE	HPD	0	-0.28
MXE	HPD	0	-0.268
MXE	PISD	0.0312734	-0.125
MXE	PROC	0.00014663	-0.121
MXE	PROC	0	-0.188
MXE	PROC	0.00248074	-0.112
MXE	SLC41A3	0.0319034	0.106
MXE	SLC41A3	0.0122108	0.278
MXE	SLC41A3	0.00121007	0.19
MXE	PLG	0	-0.176
MXE	PCBP2	9.46562e-14	0.181
MXE	MBIP	3.69325e-06	-0.308
MXE	YME1L1	1.18543e-12	0.286
MXE	ACSL1	9.67301e-07	0.112
MXE	COP1	1.31081e-06	0.216
MXE	MPZL1	0	0.218
MXE	MT2	0	-0.344
MXE	TANC1	0.0129291	-0.265
MXE	BHMT2	3.89069e-10	0.244
MXE	BHMT2	0.000249214	-0.125
MXE	UBE2E1	0.00935446	0.161
MXE	MTRR	0.00800076	0.229
MXE	MTRR	2.1149e-12	0.675
MXE	KNG1	1.95661e-07	0.145
MXE	KNG1	3.80502e-10	0.26
MXE	ZNF654	0.0273038	0.186
MXE	BMERB1	0.00312433	-0.342
MXE	DENND5B	0.00157814	-0.208
MXE	GGPS1	0.00710397	0.21
MXE	PON1	8.74444e-06	0.121
MXE	PSMA2	0	0.268
MXE	CNIH1	0	0.304
MXE	LANCL3	0.00373571	-0.296
MXE	PIGX	0.00052127	0.237
MXE	PLBD1	8.2803e-09	0.323
MXE	SMAD2	0.00599026	0.304
MXE	SLC38A4	5.3423e-15	-0.193
MXE	RIDA	0	-0.388
MXE	RIDA	0	-0.157
MXE	RIDA	0	-0.21
MXE	PUS3	0.0289491	0.291
MXE	SDHC	0	-0.2
MXE	PHYH	3.78049e-09	-0.134
MXE	AGXT	6.07471e-14	0.142
MXE	AGXT	0	0.29
MXE	AGXT	0	0.2
MXE	GLT1D1	3.79946e-10	0.381
MXE	NTAN1	0.0195365	0.107
MXE	KHK	1.26775e-09	0.17
MXE	USE1	0.00220791	0.288
MXE	ACOX2	6.28871e-05	0.13
MXE	VAMP7	1.91478e-07	0.206
MXE	SND1	0.0356417	-0.119
MXE	TXNDC17	0	0.332
MXE	KLKB1	2.88547e-11	0.251
MXE	KLKB1	1.89683e-10	0.305
MXE	TRIM44	0.0362021	0.264
MXE	FGFR2	0.0488141	-0.255
MXE	SH3BGRL	0.000275697	0.188
MXE	ACTR3B	0.000471515	-0.335
MXE	GPX3	4.89186e-08	-0.114
MXE	HDAC5	0.00495236	-0.22
MXE	CERS2	2.16794e-05	0.198
MXE	WIPI2	0.00845204	-0.122
MXE	PSMD9	0.00341812	0.164
MXE	DGAT2	9.886e-08	-0.154
MXE	ABCB11E	0.0304469	0.165
MXE	ZDHHC1	4.19473e-08	0.202
MXE	C4BPA	0.0180484	-0.102
MXE	C4BPA	0	-0.298
MXE	C4BPA	0	-0.2
MXE	C4BPA	0	-0.304
MXE	AKAP7	0.000312421	-0.163
MXE	USP25	4.08714e-06	0.286
MXE	USP25	1.05058e-14	0.259
MXE	AGPAT2	0	0.337
MXE	GCSH	0	0.375
MXE	GALNT11	1.91982e-09	-0.209
MXE	GALNT11	1.36147e-07	0.225
MXE	GALNT11	2.94626e-08	-0.351
MXE	FGD6	5.24343e-08	0.359
MXE	ASCC2	4.31255e-06	0.458
MXE	CZIB	0.0136003	-0.188
MXE	REEP6	2.45848e-10	-0.167
MXE	REEP6	6.26084e-10	-0.155
MXE	HGFAC	0	-0.29
MXE	XRN2	0.00565737	0.246
MXE	XRN2	4.61789e-05	-0.263
MXE	HNRNPH3	0.00213067	0.16
MXE	HNRNPH3	0.000591186	0.159
MXE	CRIP3	0.0129018	0.183
MXE	CRIP3	0.000759004	0.165
MXE	CRIP3	0.000113808	-0.118
MXE	TMEM59	0.00155834	-0.109
MXE	KYAT1	0.00921575	-0.127
MXE	KYAT1	0.0118237	-0.121
MXE	KYAT1	0.0198107	0.126
MXE	GYAR	0.00371459	-0.255
MXE	ABHD5	0.000198538	-0.147
MXE	ABHD5	0.00018643	-0.169
MXE	ABHD5	5.03268e-06	-0.141
MXE	KDELR1	8.29363e-11	0.227
MXE	EIF4G2	1.05058e-14	-0.265
MXE	GAS2	3.40395e-10	-0.201
MXE	PRXL2C	2.4002e-09	0.357
MXE	PRXL2C	2.24588e-07	0.299
MXE	CRYL1	5.78348e-06	-0.156
MXE	EIF4G1	0	-0.441
MXE	RNF128	0.00167311	0.243
MXE	GPX4	0	0.171
MXE	CTSH	0.00520905	0.103
MXE	RILP	0.0031922	-0.22
MXE	PANK1	0.00912092	0.107
MXE	PDK2	0.0098335	-0.131
MXE	AMDHD1	3.18595e-06	0.172
MXE	TOX4	0.0266287	-0.149
MXE	TOX4	3.55521e-08	-0.333
MXE	EIF2S3	0	-0.367
MXE	ERGIC1	2.01179e-06	-0.221
MXE	ERGIC1	0.000727374	0.103
MXE	ERGIC1	0	0.254
MXE	HNRNPDL	7.41606e-11	0.284
MXE	KLHL23	6.35636e-05	-0.418
MXE	SLC25A15	0	0.28
MXE	SLC22A5	2.96226e-07	-0.431
MXE	UGT2B31	2.38657e-11	0.144
MXE	ZNRF2	1.46651e-11	-0.256
MXE	F13B	1.91432e-06	0.174
MXE	F13B	1.37852e-13	0.238
MXE	F13B	0	0.179
MXE	ITIH3	2.0924e-13	0.173
MXE	CD36	0.000333996	-0.215
MXE	F2	1.06736e-12	0.116
MXE	F2	2.40208e-08	-0.104
MXE	LAPTM4B	0.000692399	0.118
MXE	ATG4A	0.00309447	0.168
MXE	ATP5MC3	2.38982e-12	0.136
MXE	ESRRA	0.00166282	-0.15
MXE	B3GALNT2	3.57731e-05	0.356
MXE	MAOB	0.00917727	-0.233
MXE	CYP4F3	0	0.227
MXE	ALB	0	0.287
MXE	ALB	0	0.401
MXE	ALB	0	0.42
MXE	ALB	2.75887e-07	0.235
MXE	ALB	0	0.4
MXE	ALB	2.0943e-05	-0.112
MXE	ALB	0	-0.161
MXE	ALB	8.13027e-12	-0.14
MXE	ALB	1.29886e-07	0.137
MXE	ALB	5.87767e-11	0.206
MXE	ALB	7.02228e-07	0.182
MXE	ALB	4.90331e-07	0.156
MXE	ALB	2.00086e-11	-0.144
MXE	RUFY2	0	-0.355
MXE	RPS11	0	0.25
MXE	RCBTB1	0.0278687	0.304
MXE	IDH3G	6.83901e-05	-0.229
MXE	CAMLG	0.000625076	0.258
MXE	GCGR	0	0.393
MXE	XPNPEP1	0.01879	-0.263
MXE	UGDH	1.14616e-05	0.175
MXE	UGDH	8.50298e-14	-0.234
MXE	TLK2	0.00766525	0.389
MXE	TLK2	0.0206446	0.212
MXE	CCNYL1	0.000249247	0.503
MXE	PPP6R1	0.00989543	-0.127
MXE	TK2	0.0105259	0.284
MXE	NDUFS4	9.21587e-06	0.12
MXE	ARG1	7.48587e-07	0.103
MXE	ARG1	0.00021551	-0.139
MXE	IQUB	0	0.183
MXE	POLR2I	0.00841163	-0.147
MXE	ADCK2	0.0241676	0.165
MXE	DCP1A	0.0433348	-0.33
MXE	CHD9	0.0326852	0.236
MXE	HPX	1.06103e-05	-0.105
MXE	DYM	2.16093e-05	0.437
MXE	DCXR	0.000200326	-0.113
MXE	DCXR	0.00049272	-0.149
MXE	RSL1D1	5.93283e-12	-0.311
MXE	CFI	0	0.231
MXE	CFI	1.88086e-12	-0.127
MXE	OSBPL10	0.00018643	0.252
MXE	SLCO1A2	0	0.232
MXE	SLCO1A2	0	0.181
MXE	SLCO1A2	3.35235e-05	-0.129
MXE	SLC47A1	0.0245022	-0.192
MXE	FBP1	0	0.204
MXE	TAT	1.05058e-14	-0.125
MXE	TAT	0	0.395
MXE	TAT	3.57044e-12	-0.138
MXE	UBE2H	0.0149477	0.11
MXE	MAOA	0.00260715	-0.19
MXE	OSBPL1A	4.26205e-05	0.151
MXE	OSBPL1A	1.93221e-11	0.262
MXE	OSBPL1A	8.40876e-07	0.219
MXE	HNRNPA2B1	0	0.3
MXE	BSDC1	4.0627e-07	0.234
MXE	PSMB3	1.56279e-14	0.208
MXE	CCDC91	0.00174647	0.196
MXE	XBP1	0.000576479	-0.113
MXE	ENY2	5.49545e-05	0.153
MXE	ENY2	0.00791293	0.278
MXE	ENY2	2.71271e-09	0.219
MXE	SPCS1	5.19068e-06	0.119
MXE	CP	0	0.165
MXE	CP	0	-0.353
MXE	UGGT1	0.000335716	-0.456
MXE	ATF1	0.0246891	0.142
MXE	ATF1	1.58045e-05	0.273
MXE	ATF1	0.0321387	0.349
MXE	ATF1	0.0355966	-0.195
MXE	ABCA6	0.000327467	0.126
MXE	ABCA6	0	-0.228
MXE	ABCA6	0	0.297
MXE	ABCA6	0.00129056	0.122
MXE	ABCA6	0.000109768	0.187
MXE	PRELID3B	1.38872e-09	-0.228
MXE	ATP9B	0.0270929	0.363
MXE	CYB5A	0	-0.19
MXE	CYB5A	0	-0.177
MXE	PPP1R7	7.04884e-07	-0.37
MXE	A1CF	0.0316258	-0.124
MXE	TMEM230	0.0105528	-0.264
MXE	ST6GALNAC6	0.000283379	-0.302
MXE	AFMID	0	-0.247
MXE	PSMF1	1.11392e-07	0.344
MXE	ACOX1	0.00124456	0.146
MXE	ACOX1	2.24496e-07	-0.132
MXE	AKAP10	0.00117875	0.387
MXE	RNF125	0.00442846	0.193
MXE	RNF126	4.46967e-05	-0.179
MXE	TMEM205	2.28907e-09	-0.188
MXE	DPYD	0.00103435	0.109
MXE	FGA	0	0.165
MXE	SLC12A4	0.000921473	0.248
MXE	SGK2	0.0012249	-0.201
MXE	SLC35C2	1.90845e-09	-0.136
MXE	C9	0.00361133	0.187
MXE	C9	0	0.242
MXE	C9	0	0.222
MXE	UBE2V2	1.39468e-05	-0.198
MXE	PLXNB1	1.16873e-07	-0.573
MXE	UBXN8	5.3423e-15	0.448
MXE	IL13RA1	1.81762e-10	0.42
MXE	GK	7.89201e-06	0.252
MXE	RCN2	1.57513e-07	0.213
MXE	SUMO2	6.51521e-05	0.132
MXE	USP5	4.74889e-07	-0.304
MXE	ZFAND6	8.50177e-08	0.25
MXE	ZFAND6	2.97637e-11	0.213
MXE	SEC11A	0	-0.244
MXE	PXMP2	1.24565e-11	-0.236
MXE	MAPKAP1	0.0015967	-0.152
MXE	MAPKAP1	0.0274755	-0.21
MXE	SLC17A4	1.1141e-11	0.206
MXE	SLC17A4	4.3972e-06	0.188
MXE	SLC17A4	3.71889e-06	-0.134
MXE	C6	0	0.323
MXE	ALS2	0.0483533	-0.107
MXE	EIF3E	5.0767e-06	-0.158
MXE	EIF3E	0	-0.251
MXE	EIF3E	0	-0.219
MXE	PEMT	0	0.401
MXE	RBPMS	0.000536571	0.168
MXE	OGDHL	3.28314e-06	-0.135
MXE	OGDHL	0.000264849	-0.106
MXE	RABL3	0.00341775	-0.183
MXE	ELP5	0.0374812	0.141
MXE	ELP5	0.0231911	0.136
MXE	ELP5	0	-0.396
MXE	GAMT	1.27767e-10	0.159
MXE	GAMT	3.63502e-06	0.127
MXE	NR3C1	6.51521e-05	0.383
MXE	UBE2G1	0.00244467	0.194
MXE	UBE2G1	0.0056206	0.137
MXE	MRPL13	0.0282486	-0.165
MXE	RPL12	0	-0.197
MXE	WDR81	3.32456e-08	-0.181
MXE	WDR81	2.3144e-08	-0.134
MXE	LGR4	0.000531253	-0.24
MXE	DGCR2	0.0242095	-0.102
MXE	DGCR2	1.88352e-05	-0.189
MXE	DGCR2	0.00320016	-0.122
MXE	DGCR2	1.98657e-08	-0.197
MXE	PHF21A	1.02605e-05	-0.204
MXE	FDPS	0.00278667	-0.132
MXE	ALDH1L1	0	0.343
MXE	ALDH1L1	0	0.279
MXE	ALDH1L1	5.39503e-06	-0.101
MXE	ALDH1L1	5.8497e-10	-0.133
MXE	FAM91A1	0.015577	-0.213
MXE	TLE5	0	0.32
MXE	SORD	0	-0.16
MXE	SNX2	3.23299e-05	-0.151
MXE	ITIH4	0	0.135
MXE	ITIH4	0	0.342
MXE	HSD17B4	8.03482e-14	0.171
MXE	CHTOP	0.00444938	0.197
MXE	DAB2	6.8463e-07	-0.477
MXE	TCAIM	0.0283839	-0.143
MXE	RETREG3	5.75228e-12	0.476
MXE	ANAPC16	3.95584e-08	-0.176
MXE	CPS1	0	0.186
MXE	CPS1	0	0.253
MXE	CPS1	8.76439e-13	0.153
MXE	CPS1	0	0.299
MXE	CPS1	1.95392e-12	-0.162
MXE	TCN2	5.43573e-06	-0.177
MXE	EMC2	0.000149606	0.189
MXE	SLC22A18	1.38213e-07	-0.173
MXE	CFH	6.44386e-05	0.175
MXE	CFH	0.00120056	0.204
MXE	UCHL5	0	-0.298
MXE	F5	0.000208206	-0.115
MXE	ITGAL	0.0223133	-0.185
MXE	COMMD2	9.12468e-06	-0.226
MXE	LSR	8.55722e-05	0.16
MXE	LSR	0.000229415	0.156
MXE	SETD6	5.41574e-07	0.314
MXE	AKT3	0.0215041	0.114
MXE	ERO1B	0	0.392
MXE	ADAM1A	0.00188535	0.201
MXE	ADAM1A	8.21047e-09	0.306
MXE	PCBP4	1.29008e-07	-0.19
MXE	YWHAQ	9.45451e-08	0.203
MXE	MTDH	7.69037e-10	-0.157
MXE	CDK19	0.0151458	-0.344
MXE	CDK19	0.000755355	0.258
MXE	RETREG1	0	0.38
MXE	PCMTD1	0.000821478	0.156
MXE	CYP3A12	0	0.128
MXE	QKI	0.0330422	0.133
MXE	QKI	0.000125227	0.316
MXE	QKI	0.0134914	0.18
MXE	QKI	0.00590521	0.181
MXE	SEC11C	8.5261e-06	0.114
MXE	MFF	0.0271622	0.14
MXE	MFF	0.0431572	-0.123
MXE	MFF	0.000509941	-0.121
MXE	FOXRED1	4.74833e-07	0.219
MXE	CPNE2	3.00451e-06	0.181
MXE	CPNE2	0.00015534	-0.16
MXE	CPNE2	0.0122447	-0.162
MXE	CPNE2	0.00165748	-0.146
MXE	TRIP12	0.000837417	-0.22
MXE	SCLY	0.0238634	0.115
MXE	SUCLG2	5.3423e-15	0.192
MXE	SUCLG2	2.45722e-09	0.13
MXE	SUCLG2	1.46651e-11	0.148
MXE	FGFRL1	0.00155327	0.157
MXE	SLC22A9	0.00752961	-0.101
MXE	SLC2A9	1.59857e-07	-0.201
MXE	ACADVL	3.66023e-05	-0.112
MXE	PCM1	0.0156217	-0.259
MXE	BDH2	0.00292045	-0.139
MXE	ADH4	2.88007e-06	-0.288
MXE	MRPL1	1.14904e-05	-0.179
MXE	ADAM17	0.00589196	-0.311
MXE	SULT1D1	0	0.289
MXE	MTTP	1.4804e-07	-0.197
MXE	RBM47	0.000617874	-0.33
MXE	RBM47	0.000480731	-0.299
MXE	RPL9	0	-0.294
MXE	ABCB4	0	0.334
MXE	ABCB4	0.00152048	0.158
MXE	KIN	0.00837445	-0.302
MXE	ITIH2	0	0.204
MXE	ITIH2	6.01864e-11	-0.148
MXE	PRXL2A	1.37887e-05	0.134
MXE	NME6	0.00851597	0.189
MXE	SLC39A14	4.40861e-10	0.271
MXE	LRRC8A	0.0335381	-0.121
MXE	CHCHD3	2.10896e-12	-0.334
MXE	CHCHD3	1.6216e-07	-0.364
MXE	ZCRB1	0.00702407	-0.208
MXE	IL11RA	4.55443e-10	0.272
MXE	A2M	0	0.217
MXE	A2M	0	0.112
MXE	HAL	0	0.239
MXE	C1RL	1.52125e-09	-0.184
MXE	C1RL	5.58368e-10	-0.189
MXE	ATN1	0.0400091	0.157
MXE	LTBR	0.0466939	0.107
MXE	FTH1	1.44305e-07	0.123
MXE	SLC41A2	0	-0.215
MXE	SLC41A2	0.00125442	-0.164
MXE	STAB2	4.89736e-05	0.325
MXE	LGALS1	0.000752601	0.269
MXE	APBA3	0.00580319	0.131
MXE	TMEM242	3.03755e-05	-0.2
MXE	GRAMD4	0.00427336	0.255
MXE	TBC1D22A	0.000676012	0.328
MXE	EDC3	0.0356417	-0.326
MXE	DPP3	2.66266e-06	0.46
MXE	SLC25A45	0.00121662	-0.206
MXE	NUDT22	4.70207e-07	0.319
MXE	FADS2	0	0.254
MXE	ETHE1	2.71868e-05	0.136
MXE	ETHE1	1.43655e-11	0.295
MXE	CELF1	0.00225728	-0.468
MXE	PSMC3	3.45751e-10	0.248
MXE	ARNTL	7.96308e-07	0.388
MXE	HERC4	0	0.396
MXE	ZNF215	0.00330629	0.227
MXE	ALDH4A1	0	0.294
MXE	STARD10	0.0015664	-0.104
MXE	SLC9B1	0.00108662	0.335
MXE	TMEM135	0.0022922	0.146
MXE	TMEM135	3.58663e-09	-0.222
MXE	CTSC	1.33328e-06	-0.122
MXE	SLC36A4	0.0195703	-0.192
MXE	GLS2	0	-0.161
MXE	COL13A1	0.0199146	-0.257
MXE	NT5E	5.31469e-07	0.131
MXE	NT5E	9.92443e-14	0.268
MXE	WRNIP1	0.0022285	0.216
MXE	FBXO9	0.0310347	-0.119
MXE	HNRNPM	1.10713e-07	0.245
MXE	HNRNPM	3.05008e-09	0.328
MXE	CTBS	0.00073714	-0.3
MXE	CRYZ	6.68365e-11	-0.129
MXE	CRYZ	0	0.235
MXE	SMU1	0.0411431	0.361
MXE	ANGPTL3	2.91654e-08	0.146
MXE	ANGPTL3	0	0.203
MXE	FGGY	4.84218e-10	0.255
MXE	C8B	6.75894e-08	0.153
MXE	YIPF1	1.64881e-05	0.321
MXE	SCP2	5.36677e-13	0.108
MXE	SCP2	0	0.174
MXE	SCP2	0	-0.161
MXE	SCP2	0	-0.197
MXE	ECHDC2	0.00493766	0.109
MXE	ECHDC2	0.00012417	0.112
MXE	OSBPL9	0.0196419	-0.152
MXE	RPS16	5.3423e-15	0.162
MXE	UQCRH	0	0.18
MXE	TESK2	0.0488141	-0.283
MXE	AMY2A	0	0.305
MXE	HNF4A	8.21674e-05	-0.113
MXE	TMEM269	1.07874e-09	0.267
MXE	FOXJ3	0.00357122	-0.181
MXE	ZMPSTE24	0.00158531	0.312
MXE	MFSD2A	0	-0.309
MXE	MFSD2A	3.95738e-07	0.172
MXE	THAP3	0.0498897	0.223
MXE	CNOT6L	0.00017798	0.383
MXE	LBP	0	0.233
MXE	LBP	1.05389e-08	0.187
MXE	LBP	0	0.326
MXE	TMEM14C	0.00404213	-0.176
MXE	TMEM14C	0.0066022	-0.107
MXE	PZP	5.50142e-05	0.102
MXE	PZP	0.000579142	0.229
MXE	STK24	0.0199146	-0.26
MXE	ADH6	8.25427e-05	0.153
MXE	MASP2	8.46436e-09	-0.202
MXE	MASP2	1.2403e-10	-0.147
MXE	SLC1A2	1.52125e-09	-0.161
MXE	MLF2	0.0355547	-0.14
MXE	PAXX	0.000534985	0.14
MXE	ASS1	0	-0.214
MXE	ASS1	1.79474e-08	0.107
MXE	ASS1	0	-0.258
MXE	HRG	0.000464766	0.113
MXE	PTPA	0.00227941	-0.178
MXE	TRUB2	0.0119876	0.221
MXE	PBX3	0.00800667	0.124
MXE	SLC25A32	0.0015444	0.175
MXE	GARNL3	0.0353633	0.257
MXE	SAE1	4.55269e-11	-0.55
MXE	DENND1A	0.00399671	-0.442
MXE	C5	8.21674e-05	0.108
MXE	C5	5.45638e-09	-0.146
MXE	C5	1.67701e-12	-0.158
MXE	DPAGT1	0.0019669	0.254
MXE	ORM1	1.94291e-07	0.262
MXE	PRDX5	0	0.184
MXE	NDUFB6	0	0.425
MXE	ADPGK	0.00145356	0.157
MXE	KIAA2026	0.0252771	0.339
MXE	GALM	3.28762e-05	0.163
MXE	GALM	3.47637e-08	0.26
MXE	MFSD14B	0.00277762	-0.312
MXE	KATNA1	3.11765e-08	0.488
MXE	SPART	0	-0.448
MXE	FRG1	0.0247116	-0.198
MXE	SLC7A2	4.88341e-08	0.304
MXE	HOOK3	0.000309129	0.337
MXE	DNAJC3	2.9766e-06	-0.227
MXE	CLPX	0	0.249
MXE	CLPX	0.000111971	0.145
MXE	CLPX	8.41885e-08	-0.152
MXE	DNAJC15	0	0.367
MXE	OTC	1.98657e-08	-0.126
MXE	OTC	1.19158e-09	-0.149
MXE	OTC	5.61376e-14	0.164
MXE	TDO2	2.0924e-13	-0.136
MXE	TMEM62	0.000355242	-0.206
MXE	HPGD	1.28263e-10	0.193
MXE	GCDH	2.37174e-10	-0.15
MXE	DHPS	0.00454725	-0.109
MXE	UOX	5.32543e-09	-0.116
MXE	UOX	0	0.384
MXE	MVB12A	0.000162001	-0.159
MXE	AP3S1	6.60501e-09	0.381
MXE	DHRS3	4.52052e-09	-0.231
MXE	FGB	0	-0.164
MXE	C3	5.79653e-10	-0.137
MXE	NFIC	0.0172379	-0.117
MXE	ATXN10	0.048567	0.109
MXE	GLUD1	0	0.2
MXE	CDC123	0.00442065	-0.154
MXE	USP54	0.000882657	-0.515
MXE	GSTM1	0.00186466	-0.112
MXE	DNAJC12	1.0467e-06	-0.173
MXE	DNAJC12	0	0.319
MXE	LIPA	0.000175109	0.111
MXE	PIK3AP1	0.000352673	0.203
MXE	ADAM9	0.000189639	-0.266
MXE	PAPOLA	6.11733e-05	0.178
MXE	SERPINA1	0	0.273
MXE	SERPINA1	0	0.304
MXE	IFI27	1.27061e-09	-0.189
MXE	RIN3	0.000892616	0.197
MXE	RNF181	0.000100196	0.18
MXE	PCNP	1.5313e-06	-0.151
MXE	PCNP	0	-0.359
MXE	SMOC1	0.000370931	0.209
MXE	GCH1	0	0.302
MXE	RALGPS2	0.0171161	-0.293
MXE	TLN2	0.000204963	-0.463
MXE	GTF2A2	6.63901e-06	0.274
MXE	LIPC	0	0.236
MXE	SQOR	0.0223918	0.102
MXE	ZNF106	0.0316916	0.277
MXE	ZNF106	0.037532	0.242
MXE	MIA2	0	-0.301
MXE	MIA2	8.44754e-06	0.11
MXE	DHX38	0	-0.393
MXE	CRCP	0.00714193	-0.294
MXE	CRCP	5.51385e-08	-0.421
MXE	CRCP	0.00210986	-0.2
MXE	AUTS2	0.0233156	-0.23
MXE	POR	0.0018866	0.126
MXE	CUX1	0.0365573	-0.397
MXE	COPS6	0.0306593	0.109
MXE	MACIR	0.00594768	-0.102
MXE	PPIP5K2	0.00027235	0.399
MXE	ELL2	0.0195575	0.14
MXE	TARBP2	0.0449944	-0.208
MXE	BHMT	2.88117e-09	0.209
MXE	BHMT	0	0.216
MXE	MTSS2	0.000795072	-0.5
MXE	SCAMP1	0.000719876	-0.243
MXE	SLCO2A1	0	0.327
MXE	SLCO2A1	0	-0.234
MXE	SLCO2A1	5.3423e-15	-0.423
MXE	MOCS2	2.50842e-11	-0.179
MXE	MOCS2	2.37944e-07	-0.269
MXE	MOCS2	0.00712216	-0.133
MXE	MOCS2	1.18016e-06	0.213
MXE	FZD3	0.00312272	0.2
MXE	GHR	0.00806454	-0.183
MXE	AGXT2	0.00467291	-0.124
MXE	STT3B	2.86945e-07	0.184
MXE	GOLPH3	3.86551e-10	-0.205
MXE	MARCHF6	0	0.365
MXE	NCOA2	0.0228238	0.15
MXE	HLA-DRA	1.34599e-09	0.37
MXE	UBE2B	7.0587e-14	-0.277
MXE	PIH1D1	9.4065e-10	0.439
MXE	SULT3A1	0.00137868	-0.153
MXE	MLXIPL	0.00175908	0.323
MXE	MANEA	7.84739e-05	-0.302
MXE	SLC35A1	8.21047e-09	-0.386
MXE	PTP4A1	0	0.228
MXE	SLC29A1	0	0.3
MXE	SLC29A1	0	0.238
MXE	SLC29A1	0	0.301
MXE	SLC29A1	0	0.279
MXE	SLC29A1	0	0.228
MXE	SLC29A1	0	0.281
MXE	SLC29A1	4.91899e-06	0.147
MXE	SLC29A1	2.41431e-13	-0.158
MXE	ZFAND3	0.000834605	0.193
MXE	ZFAND3	9.24415e-07	0.199
MXE	SLC26A8	0.0215982	-0.117
MXE	SLC26A8	0.000200274	-0.144
MXE	ILRUN	0.000990163	0.153
MXE	RPS18	3.07455e-14	0.118
MXE	CFB	0	0.269
MXE	SLC5A6	0.0122447	-0.158
MXE	RTN4	0.000134663	0.119
MXE	SLC38A3	0	0.191
MXE	IL1RAP	0.00089208	-0.137
MXE	PPARA	0.00121682	0.11
MXE	FTCD	5.40818e-07	-0.112
MXE	KIAA1191	0.000254573	-0.156
MXE	C4A	0	0.184
MXE	C4A	0	-0.191
MXE	C4A	9.36114e-08	-0.113
MXE	C4A	0	-0.183
MXE	TPD52L1	0.00798906	0.126
MXE	CLU	0.0011985	-0.106
MXE	CLU	0.000607161	-0.15
MXE	CLU	9.69182e-07	-0.111
MXE	CD302	0.0451365	-0.259
MXE	CD302	0.0461217	-0.239
MXE	CD302	0.0455883	-0.16
MXE	CD302	0.0216779	-0.184
MXE	HPD	0.000393529	-0.307
MXE	HPD	0.0395499	-0.249
MXE	GGT1	0.000111433	0.105
MXE	AASS	4.28535e-12	-0.373
MXE	GPLD1	0.000816173	0.254
MXE	VTN	8.33368e-10	0.129
MXE	HPN	0	-0.279
MXE	KNG1	0.000338014	0.432
MXE	GAREM1	0.0136003	-0.179
MXE	SLC38A4	1.71716e-06	-0.4
MXE	SLC38A4	3.06485e-06	-0.383
MXE	RIDA	0	-0.157
MXE	PHYH	0	-0.318
MXE	PHYH	0	-0.306
MXE	AGXT	0	0.18
MXE	AGXT	0	0.291
MXE	AGXT	3.59592e-05	0.115
MXE	RAD23A	0.00125706	0.115
MXE	FETUB	0.0107715	0.115
MXE	FETUB	0.00404213	0.137
MXE	VAMP7	1.42672e-07	0.208
MXE	PIGR	5.31195e-05	0.157
MXE	ACSL4	0.012107	0.127
MXE	RDH11	2.7686e-10	-0.166
MXE	C4BPA	0	-0.303
MXE	LDHD	3.77826e-05	0.237
MXE	GCSH	0	0.378
MXE	GALNT11	8.91061e-06	-0.458
MXE	GALNT11	2.36883e-08	-0.394
MXE	AUP1	0	-0.387
MXE	HSP90B1	1.56279e-14	-0.152
MXE	GSTA2	3.12284e-05	-0.157
MXE	GSTA2	0.0073568	-0.462
MXE	ST3GAL4	0.0157149	0.112
MXE	ST3GAL4	3.27488e-08	0.273
MXE	ST3GAL4	0.000262769	0.246
MXE	ST3GAL4	0.0182505	0.111
MXE	ST3GAL4	4.88341e-08	0.27
MXE	ST3GAL4	0.000333996	0.241
MXE	REEP6	6.31367e-10	-0.158
MXE	GNMT	0	0.146
MXE	MARCHF7	6.75266e-09	0.408
MXE	CRIP3	1.34194e-06	-0.305
MXE	CRIP3	1.47577e-07	-0.363
MXE	CRIP3	0.000621992	0.119
MXE	PLEKHH3	0.0149365	0.111
MXE	KYAT1	0.0027128	-0.372
MXE	KYAT1	0.0337286	-0.3
MXE	KYAT1	0.00261207	-0.347
MXE	KYAT1	0.0348362	-0.277
MXE	KYAT1	0.0027128	-0.374
MXE	KYAT1	0.0333991	-0.302
MXE	KYAT1	0.00354451	-0.368
MXE	KYAT1	0.0408757	-0.296
MXE	GYAR	2.20508e-05	-0.315
MXE	GYAR	6.24787e-05	-0.402
MXE	GYAR	0.0097852	-0.234
MXE	GYAR	0.00960735	-0.296
MXE	GYAR	0.00496724	-0.299
MXE	PFKFB1	0.018335	-0.138
MXE	EIF4G1	0	-0.353
MXE	EIF4G1	0	-0.356
MXE	EIF4G1	0.0158045	-0.109
MXE	ERGIC1	0.0454773	-0.389
MXE	F2	0	0.29
MXE	B3GALNT2	1.06103e-05	0.349
MXE	ALB	0	0.232
MXE	ALB	0	0.268
MXE	ALB	0	0.283
MXE	ALB	0	0.371
MXE	ALB	0	0.375
MXE	ALB	5.72002e-11	0.523
MXE	ALB	0	0.287
MXE	ALB	2.74767e-12	0.27
MXE	ALB	0	0.445
MXE	ALB	5.49568e-08	0.566
MXE	ALB	2.49486e-09	0.626
MXE	ALB	2.17129e-08	-0.16
MXE	ALB	0.000151312	0.292
MXE	ALB	0	-0.161
MXE	ALB	1.18517e-12	-0.126
MXE	ALB	4.30987e-10	-0.105
MXE	ALB	0	-0.163
MXE	ALB	0	0.24
MXE	ALB	0	0.24
MXE	ALB	5.8475e-11	0.206
MXE	ARG1	0.00011389	-0.164
MXE	HPX	0.000591055	0.374
MXE	DCXR	0.0185045	-0.128
MXE	DCXR	0.000258441	-0.113
MXE	DCXR	3.83419e-07	0.14
MXE	GAL3ST1	0.0352764	-0.187
MXE	SLC37A4	1.02723e-07	-0.177
MXE	SLCO1A2	0	0.381
MXE	SLCO1A2	3.40395e-10	0.268
MXE	TAT	1.05058e-14	-0.125
MXE	ST6GALNAC6	0.00176417	-0.407
MXE	ST6GALNAC6	0.0449944	-0.273
MXE	ST6GALNAC6	3.61663e-05	-0.377
MXE	PATR-A	1.23472e-10	-0.238
MXE	ACOX1	6.2772e-12	-0.124
MXE	ACOX1	1.29337e-06	-0.143
MXE	ACOX1	0.000905984	-0.13
MXE	OSER1	0.00143291	-0.132
MXE	PSMD1	4.77602e-07	0.167
MXE	SHBG	7.43341e-12	0.208
MXE	AHSG	1.09429e-06	0.104
MXE	ELP5	0.0368159	0.101
MXE	TRPV2	0.0322372	0.108
MXE	RPL12	0	-0.202
MXE	WDR81	4.34793e-08	-0.185
MXE	WDR81	2.80283e-08	-0.182
MXE	WDR81	5.24343e-08	-0.184
MXE	DGCR2	0.011573	-0.114
MXE	ECI2	4.62813e-08	-0.158
MXE	PHF21A	3.85215e-08	0.172
MXE	ITIH4	4.02991e-07	-0.227
MXE	ITIH4	0	0.134
MXE	ITIH4	0	0.356
MXE	ITIH4	0	0.165
MXE	CPS1	0	-0.298
MXE	ERP44	2.02174e-07	0.131
MXE	CFH	3.28608e-08	0.15
MXE	CFH	2.10604e-06	-0.106
MXE	F5	0.000167985	-0.115
MXE	LSR	0.00194453	-0.159
MXE	LSR	0.000376747	-0.304
MXE	TF	4.88341e-08	0.237
MXE	TF	2.05074e-09	0.269
MXE	TF	1.89609e-11	0.273
MXE	MFF	1.43408e-05	-0.385
MXE	MFF	0.000464766	-0.329
MXE	FOXRED1	2.90279e-06	0.217
MXE	MOGAT2-B	0.0272284	0.105
MXE	TCEA1	5.69323e-06	-0.223
MXE	RBP4	0	0.3
MXE	ACADVL	0	0.187
MXE	SULT1D1	0	0.288
MXE	SEPHS1	0.0349847	0.114
MXE	SLC39A14	3.2249e-06	0.332
MXE	PDCD5	3.89657e-05	0.281
MXE	A2M	0	-0.305
MXE	EMG1	0.000192194	0.292
MXE	SLC22A6	0.000154522	-0.166
MXE	SLC22A6	0.000158153	-0.166
MXE	SIRT3	7.436e-05	0.203
MXE	SIRT3	0.0469707	0.154
MXE	PNPLA2	0.0400091	0.199
MXE	CELF1	0.000259395	-0.515
MXE	IL6ST	0.00176617	-0.198
MXE	IL6ST	0.0248614	-0.153
MXE	CADM1	8.23979e-11	-0.307
MXE	ALKBH6	0.00591951	-0.152
MXE	GLS2	8.94031e-06	0.34
MXE	GLS2	1.34311e-05	0.338
MXE	GLS2	1.67187e-05	0.351
MXE	APOA1	0	-0.461
MXE	NT5E	6.22392e-07	0.131
MXE	ZZZ3	0.0207917	-0.324
MXE	SCP2	0	0.135
MXE	MASP2	9.25113e-09	-0.202
MXE	SLC1A2	0.000110738	0.156
MXE	PAXX	0.00018643	0.178
MXE	ORM1	5.17273e-06	0.117
MXE	ORM1	0.0257571	0.16
MXE	ORM1	0.0010234	0.454
MXE	ORM1	0.00411827	0.424
MXE	ORM1	0.00101551	0.454
MXE	ORM1	0.00100715	0.454
MXE	ORM1	0.000728962	0.461
MXE	ORM1	0.000994423	0.454
MXE	ORM1	0	0.157
MXE	ORM1	0	0.159
MXE	ORM1	0	0.158
MXE	ORM1	0	0.158
MXE	ORM1	0	0.162
MXE	ORM1	4.43383e-12	0.196
MXE	ORM1	0.000121846	0.209
MXE	ORM1	0	0.158
MXE	SLC31A1	0.000174097	0.402
MXE	SLC31A1	3.60513e-05	0.348
MXE	CYP2C21	6.99318e-10	-0.113
MXE	CYRIB	0.0365496	0.105
MXE	CYRIB	0.000922627	0.108
MXE	SLC7A2	5.43249e-11	0.167
MXE	SLC7A2	3.55962e-10	0.32
MXE	UBAC2	1.54625e-05	-0.265
MXE	TMEM219	2.73597e-08	0.27
MXE	GCDH	1.61776e-10	-0.146
MXE	FGB	0	0.192
MXE	C3	0	-0.214
MXE	OAZ1	0	0.247
MXE	GSTM1	0.000166455	0.226
MXE	HABP2	3.37834e-10	0.186
MXE	SSR3	0	-0.283
MXE	SERPINA1	0.000614347	-0.16
MXE	SERPINA1	0.000433055	-0.165
MXE	SERPINA1	0.00066383	-0.16
MXE	SERPINA1	0.000469038	-0.166
MXE	SERPINA1	0.000670186	-0.161
MXE	SERPINA1	0.000472546	-0.167
MXE	SERPINA1	0.00173283	-0.148
MXE	SERPINA1	0.00124622	-0.154
MXE	SERPINA1	0.0109831	0.252
MXE	SERPINA1	0.00938087	0.258
MXE	SERPINA1	0.00126925	0.205
MXE	SERPINA1	0.0011835	0.187
MXE	SERPINA1	0.00324695	0.203
MXE	SERPINA1	0.0119101	0.153
MXE	SERPINA1	0.000148727	0.157
MXE	SERPINA1	0.0349847	0.134
MXE	DHRS7	0	0.287
MXE	RNASE4	0.00703952	-0.268
MXE	RNASE4	0.00217493	-0.289
MXE	RNASE4	1.58926e-10	-0.13
MXE	RNASE4	5.81801e-10	-0.119
MXE	RNASE4	1.68045e-08	0.102
MXE	AUTS2	0.015866	0.179
MXE	PAM	9.48955e-07	0.173
MXE	PAM	3.79714e-06	0.155
MXE	ABI1	1.11392e-07	0.286
MXE	ABI1	3.26497e-07	0.274
MXE	CFB	0	0.272
MXE	CFB	0	0.255
MXE	CFB	0	0.258
MXE	CFB	0	0.222
MXE	CFB	0	-0.205
MXE	TMEM87B	6.17014e-06	0.463
RI	CLK1	3.76392e-06	-0.386
RI	DDX46	0.0112026	0.434
RI	GDE1	0.0216173	-0.359
RI	RBM5	0.000611678	-0.493
RI	RBM5	8.8929e-05	-0.457
RI	SFSWAP	9.97921e-07	-0.469
RI	ACY3	0.0315222	-0.107
RI	PYGO2	4.44637e-05	-0.264
RI	ARMCX3	0.00720796	-0.503
RI	C9ORF64	0.015225	-0.12
RI	CD1D	0.00328397	-0.418
RI	MINDY1	0.0161882	-0.298
RI	TMCO6	0.0169834	-0.143
RI	SALL1	0.00978902	0.248
RI	PPP4R2	3.29775e-07	0.105
RI	TSEN34	0.00488082	0.171
RI	ST3GAL1	0.0152446	0.307
RI	SLC45A3	0.0367874	-0.196
RI	C7ORF26	4.76718e-09	-0.27
RI	C7ORF26	1.07413e-07	-0.373
RI	MBD1	3.5162e-05	-0.556
RI	SWI5	0.00542116	0.337
RI	SLC30A10	6.60458e-06	-0.599
RI	AKAP17A	0.00331784	-0.445
RI	HNRNPDL	0.00778976	-0.238
RI	PRRC2C	0.00798011	-0.38
RI	GCGR	0.00139977	-0.366
RI	GCGR	3.88201e-05	-0.314
RI	TTPAL	0.000554777	-0.214
RI	FMR1	9.40242e-05	-0.31
RI	FIGNL1	0.000367298	-0.493
RI	PLAUR	0.00937275	-0.33
RI	SLCO1A2	8.15067e-09	0.258
RI	RPL10	0.000893259	0.107
RI	NIT1	8.37333e-06	-0.41
RI	NIT1	0.00751257	-0.316
RI	RNF126	0.000150905	-0.269
RI	LUC7L3	2.57664e-12	-0.399
RI	TSEN54	0.000240592	-0.299
RI	UBB	0	-0.266
RI	ULK2	5.84756e-05	-0.526
RI	RBPMS	0.0315559	0.378
RI	ASPA	0.00935125	-0.209
RI	ATP11A	9.17012e-06	-0.524
RI	NR5A2	0.000400758	0.143
RI	RBM39	0.0311563	-0.216
RI	MASP1	0.0443647	-0.311
RI	WSB1	0.00127099	-0.151
RI	MMTAG2	1.88287e-06	-0.3
RI	LIN54	0.00862385	-0.32
RI	MBNL3	0.000239935	-0.359
RI	ABCB4	1.30194e-07	-0.164
RI	NR1H4	0.0478273	-0.215
RI	ABCC5	0.000976588	-0.392
RI	AKAP8L	0.0375249	0.163
RI	NXF1	5.95768e-07	-0.461
RI	DMAP1	0.0005071	0.408
RI	PACSIN3	0.0379771	-0.344
RI	MTHFS	2.00129e-05	-0.307
RI	ALG9	0.00145599	-0.447
RI	ATP5F1D	3.15848e-07	0.141
RI	ADPRS	7.25859e-05	-0.136
RI	S100PBP	0.000342458	-0.329
RI	S100PBP	0.0253927	-0.397
RI	DDX5	0.0371151	-0.148
RI	DNAJC16	0.0301162	-0.416
RI	IL1RN	7.90156e-05	0.21
RI	IL1RN	0.017883	0.196
RI	INTS10	5.15769e-07	-0.185
RI	INTS10	0.0100923	-0.53
RI	TPT1	4.44441e-08	-0.16
RI	ADAMTS13	0.0247136	-0.411
RI	INSR	0.000985167	-0.123
RI	GTF2F1	0.00292601	-0.152
RI	FRMD4A	0.00105621	-0.48
RI	MIER2	0.00831434	-0.34
RI	MIER2	1.75451e-05	-0.169
RI	NOXO1	0.0203192	0.288
RI	NOXO1	0.000299685	0.412
RI	CGREF1	0.00909908	-0.381
RI	DCAF11	0.00588881	-0.181
RI	PRPF39	0.000161744	-0.447
RI	PRPF39	0.0330094	-0.274
RI	NSUN5	0.0127249	-0.143
RI	MLXIPL	0.0343506	-0.305
RI	ABCG8	4.29654e-06	-0.585
RI	CIITA	3.88359e-07	0.355
RI	TAF10	0.0413313	0.176
RI	SAT2	0.00182934	-0.157
RI	C4A	0.044346	-0.181
RI	RTEL1	0.0348056	-0.232
RI	RTEL1	0.0397909	-0.102
RI	GC	0.00252672	-0.509
RI	RNF123	2.95784e-08	0.239
RI	RNF123	0.000479639	0.136
RI	MAPK3	0.0132941	-0.331
RI	MAPK3	0.0192495	-0.296
RI	PLA2G3	1.04632e-10	-0.383
RI	PLA2G3	7.85212e-07	-0.314
RI	CYP2D17	9.91279e-05	-0.118
RI	HPN	0.000431799	-0.41
RI	MPZL1	0.00937275	-0.336
RI	PPOX	0.00303502	0.145
RI	PPOX	0.0228428	-0.116
RI	KNG1	3.47541e-05	-0.102
RI	PGGHG	3.12875e-05	-0.312
RI	AGXT	0.00100569	-0.392
RI	KHK	0.00016318	-0.316
RI	KLKB1	2.4801e-05	-0.333
RI	KLKB1	0.0499059	-0.323
RI	KLKB1	9.97921e-07	-0.359
RI	KLKB1	1.77256e-05	-0.389
RI	ACBD4	0.0129124	-0.219
RI	TIGD5	0.00521454	-0.306
RI	SALL1	0.00205022	0.223
RI	NDRG2	0.0219036	-0.187
RI	NDRG2	2.68682e-12	-0.205
RI	MAP2K7	3.37088e-05	-0.16
RI	SULT1A1	0.0288165	-0.318
RI	CNPY3	1.76407e-05	-0.126
RI	EIF4G1	0.0146989	-0.377
RI	CLTCL1	1.50803e-06	-0.581
RI	PTPRU	0.0026449	-0.498
RI	ZNRF2	0.0228428	-0.138
RI	ITIH3	0.0127506	-0.137
RI	STAB1	0.0295451	0.102
RI	DNTTIP1	0.00156166	-0.121
RI	PHF1	4.44637e-05	-0.229
RI	CCNL2	0.00923536	-0.183
RI	HPX	0	-0.112
RI	HPX	0	-0.46
RI	HPX	0	-0.6
RI	HPX	0.00196518	-0.225
RI	C2CD2L	2.36257e-06	-0.361
RI	PHKG2	0.0499059	-0.15
RI	STK19	1.47212e-08	-0.158
RI	STK19	0.00023428	-0.137
RI	HDGF	0.0228428	-0.226
RI	RNF126	0	-0.24
RI	RNF126	1.74501e-05	0.261
RI	RGS14	0.0375934	-0.169
RI	MIA3	0.0170991	-0.39
RI	APOC1	1.89531e-10	-0.161
RI	ITIH4	8.63768e-06	-0.182
RI	ADAM15	0.000460215	-0.487
RI	VEGFB	0.00196518	-0.208
RI	HYAL1	0.000184973	-0.134
RI	SETD6	0.00119119	-0.143
RI	MMTAG2	5.02724e-09	-0.306
RI	GPT	4.73254e-05	-0.23
RI	GPT	4.23347e-05	-0.434
RI	GPT	0.000824494	-0.296
RI	C8ORF33	0.00831434	-0.278
RI	FOXRED1	8.8342e-14	-0.114
RI	GSTA4	0.00418443	-0.132
RI	TADA2B	4.30607e-05	-0.403
RI	ARGLU1	1.86942e-08	-0.587
RI	A2M	0.000112339	-0.195
RI	NCAPH2	3.38361e-10	-0.227
RI	NCAPH2	0.0137752	-0.124
RI	NCAPH2	0.0215304	-0.103
RI	NCAPH2	2.16886e-06	-0.178
RI	RCE1	0.00124695	-0.232
RI	FXR1	0.0279536	-0.12
RI	GLS2	0.0493157	-0.324
RI	HOOK2	0.00624057	-0.292
RI	PRRC2A	7.34218e-06	-0.135
RI	PRRC2A	0.0413476	-0.175
RI	UQCRH	0.000449837	-0.108
RI	NOP56	1.28202e-10	-0.25
RI	PZP	0.029233	-0.371
RI	MASP2	0.0253927	-0.139
RI	SHARPIN	0.000854137	-0.477
RI	SHARPIN	0.00013858	-0.291
RI	PUSL1	0.00978902	0.198
RI	PUSL1	0.00372489	0.135
RI	PTPA	0.00907527	-0.362
RI	AMBP	4.91306e-09	-0.238
RI	INTS10	4.00224e-05	-0.61
RI	BNIP3	1.36309e-05	-0.234
RI	FGG	0.0325309	-0.254
RI	FAM20C	0.000242099	-0.366
RI	SHFL	0.00373296	-0.415
RI	SHFL	0.000457057	-0.392
RI	PKN1	1.58615e-05	-0.195
RI	MAN2C1	0.000369029	-0.326
RI	MTA1	0.000443134	-0.149
RI	MRPL52	2.21844e-08	0.16
RI	PNP	6.07763e-06	-0.474
RI	KHNYN	0.000449837	-0.108
RI	TXLNA	4.39204e-05	-0.211
RI	MLXIPL	9.09887e-10	-0.37
SE	ITGB1BP1	0.00578782	0.166
SE	ITGB1BP1	0.00571648	0.192
SE	PPM1B	0.000135221	0.251
SE	NCOR2	0.0350283	0.336
SE	MTX2	0.032339	0.251
SE	SLC26A2	4.96662e-07	0.198
SE	STEAP3	0.0119457	-0.236
SE	CD47	0.00306363	0.264
SE	APOOL	0.0127676	-0.122
SE	SPOPL	0.0149252	0.117
SE	KIAA1191	0.00950391	-0.221
SE	ATXN7	0.00030585	0.109
SE	SLMAP	0.00874977	-0.192
SE	CACUL1	0.00467244	-0.156
SE	CEP63	0.00448425	0.135
SE	ACP1	0.0249398	0.161
SE	ARPC1A	6.29679e-09	0.27
SE	SRRM2	9.64382e-14	-0.409
SE	AGAP3	0.0075616	0.378
SE	AGAP3	0.00865249	0.435
SE	PLA2G3	4.29694e-07	-0.161
SE	CD302	4.89105e-09	-0.113
SE	IP6K2	0.000114758	-0.152
SE	SLC41A3	0.0020857	-0.199
SE	TBCEL	0.00362427	0.336
SE	DHX9	0.0242521	-0.121
SE	FAM20B	0.0397697	0.195
SE	FMO4	0.0048348	-0.32
SE	MRPS24	4.35309e-05	-0.111
SE	BMERB1	0.00575051	-0.42
SE	MPP6	0.026669	-0.327
SE	CCDC167	0.00238409	0.258
SE	TMEM50B	0.00292296	0.223
SE	ABHD4	0	0.231
SE	PRELID3A	0.0310149	0.395
SE	RCL1	1.27898e-05	0.253
SE	SLC38A4	0	-0.161
SE	SLC38A4	9.64382e-14	-0.11
SE	SLC38A4	0.000694699	-0.108
SE	PUS3	0.0394337	-0.383
SE	PUS3	0.0143065	-0.347
SE	GLT1D1	6.91944e-10	-0.394
SE	GLT1D1	0.00857954	0.124
SE	GLT1D1	0.0434724	-0.204
SE	PTBP2	0.00758049	0.409
SE	VCAM1	5.54767e-05	0.129
SE	LUC7L	7.44742e-08	-0.568
SE	ARNT	0.0350232	-0.26
SE	DCTN1	0.00377374	0.134
SE	DCTN1	0.000347695	0.209
SE	KLKB1	0.0164832	0.128
SE	LUC7L2	0.00732538	-0.45
SE	LUC7L2	0.0102927	-0.438
SE	ACTR3B	0.0274721	-0.155
SE	CLN8	0.00547084	0.259
SE	PTP4A2	0.0248067	-0.173
SE	PTBP1	0.00776774	-0.139
SE	GALNT11	0.0346514	-0.289
SE	GALNT11	0.000863628	-0.378
SE	CDC42EP1	0.00062796	-0.383
SE	ANKRD11	0.00183241	0.232
SE	MISP	0.00793737	0.32
SE	EMC10	0.00592782	-0.252
SE	ATE1	0.000754212	0.438
SE	MFSD11	0.000155904	-0.128
SE	SLC45A3	0.0274741	0.203
SE	NUDT7	3.01134e-05	-0.278
SE	SWI5	0.00523984	-0.108
SE	ALG13	0.00129579	-0.259
SE	TMEM59	0.000589323	0.137
SE	KYAT1	0.0164832	-0.112
SE	TMEM11	0.00879085	0.215
SE	ZC3H18	0.00224732	0.217
SE	SMPD4	0.000735046	-0.233
SE	PFKFB1	0.000304985	-0.102
SE	JHY	0.0125746	-0.369
SE	MAVS	0.0165273	0.153
SE	ZBBX	0.000235609	-0.246
SE	ZBBX	0.00309131	0.362
SE	GNAS	0.00017477	-0.171
SE	GPCPD1	0.00276081	-0.304
SE	RAB4A	0.0299605	0.122
SE	PRRC2C	0.0107318	-0.342
SE	PTPN3	0.00407811	-0.117
SE	ASH1L	0.00609642	-0.123
SE	DNTTIP1	1.72374e-05	-0.307
SE	PRPSAP2	0.0361505	0.376
SE	NAA60	1.13389e-09	-0.189
SE	EXOC1	1.21496e-06	0.548
SE	RAB5C	0	0.344
SE	IFT20	0.00254508	0.313
SE	FKBP7	0.041033	0.103
SE	HNRNPA2B1	0.000430037	-0.125
SE	CD74	5.89579e-07	-0.165
SE	ZMYM5	0.0074634	-0.337
SE	TMEM106C	0.00179	0.187
SE	FAM210A	0.0101981	-0.129
SE	RAPGEF2	0.00581547	-0.534
SE	FASTKD5	6.09002e-06	0.469
SE	USP19	1.50944e-06	0.236
SE	ACOX1	0.00029746	0.155
SE	GPBP1	0.00547241	-0.167
SE	LUC7L3	0.00732538	-0.137
SE	RBM12	0.0162414	0.24
SE	VPS25	0.00184563	0.197
SE	NBR1	0.00159359	-0.107
SE	EIF4A1	0.00108951	0.119
SE	SGK2	0.0334143	-0.113
SE	UBE2V2	0.0199488	0.173
SE	GK	0.00547241	0.264
SE	G3BP1	0.000104118	0.125
SE	TTC19	0.0321766	0.225
SE	MLLT10	0.0295109	-0.424
SE	UBE2G1	0.0350232	-0.104
SE	SUPT20H	0.0171459	-0.159
SE	CEP57L1	0.000674811	-0.404
SE	SUPT6H	0.0380268	0.108
SE	SUPT6H	0.00984867	0.212
SE	FDPS	0.00698825	0.235
SE	LGALS9	0.0175974	-0.32
SE	ANKRD17	0.0211668	-0.319
SE	NMT2	0.0128648	0.26
SE	RBM39	0.0201222	-0.319
SE	ITIH4	0.00928524	-0.238
SE	DAB2	0.00336853	0.178
SE	BAP18	0.0181727	-0.196
SE	BAP18	0.0267081	-0.24
SE	PSKH1	0.000782884	0.118
SE	MAP3K3	0.000118158	0.398
SE	GK5	0.00237122	-0.137
SE	NFE2L1	0.00292296	-0.204
SE	LENG8	0.0154854	-0.238
SE	CACNB4	0.0450447	0.213
SE	MTDH	1.10855e-05	-0.449
SE	CDK19	0.00384473	-0.225
SE	NDST1	0.000154488	-0.165
SE	NDST1	0.000430716	-0.119
SE	RALY	0.000180804	0.187
SE	TRMO	0.00547084	-0.245
SE	FGFR3	0.00108493	-0.344
SE	CCM2	4.73643e-05	0.497
SE	G3BP2	0.011392	0.18
SE	DPY19L4	1.61543e-06	-0.468
SE	FBXO31	0.0325976	-0.285
SE	MGAT1	0.00536063	-0.357
SE	MGAT1	0.000195977	0.118
SE	R3HDM2	0.0419182	0.219
SE	CCNT1	0.0222682	0.207
SE	PPFIBP1	1.56876e-05	0.455
SE	PLEKHA5	0.000571729	-0.271
SE	RIPOR1	0.00806734	-0.298
SE	STOX1	0.00939678	0.371
SE	HMGXB4	0.00540934	-0.377
SE	HMGXB4	0.00990106	-0.355
SE	NFATC1	0.00454971	-0.243
SE	ATP11C	0.000891117	-0.226
SE	TPM1	0.00341322	-0.212
SE	RNH1	0.0128337	-0.236
SE	CHKA	0.00226512	-0.223
SE	DPP3	0.00100457	-0.364
SE	AKAP8L	0.03298	-0.11
SE	AKAP8L	0.00747407	-0.194
SE	CELF1	6.08104e-05	0.231
SE	CELF1	0.0325505	0.349
SE	IL6ST	0.00011112	0.231
SE	PICALM	0.00462784	0.198
SE	TRAPPC12	1.00743e-05	0.219
SE	TM2D3	0.00115509	0.251
SE	CRYZ	0.00645866	0.144
SE	ZXDC	0.00324224	-0.206
SE	BTF3L4	1.02506e-06	-0.257
SE	TRMT1L	0.0359462	0.241
SE	PAXX	0.0350232	0.128
SE	GOLGA2	0.000312982	-0.221
SE	PITPNM2	0.00135276	-0.585
SE	GAPVD1	0.0102181	-0.272
SE	CARD19	0.0242992	0.105
SE	PTBP3	0.0445313	-0.121
SE	CYP1A1	0	0.273
SE	CYP1A1	0	0.151
SE	HNRNPA3	0.0106531	-0.239
SE	NMRK1	0.0313731	0.25
SE	NFIB	0.0253242	-0.392
SE	SMAP1	1.8962e-05	0.267
SE	ENTPD8	0.00137485	0.148
SE	SLC7A2	0	0.104
SE	SLC7A2	1.26516e-05	0.425
SE	SRSF11	0.00103509	-0.324
SE	SRSF11	0.00908602	-0.328
SE	NSD3	0.000495859	-0.532
SE	ZSCAN29	0.00380605	-0.205
SE	PROZ	0	-0.13
SE	TEX30	0.0033288	-0.142
SE	RBM26	0.0310533	0.267
SE	DNAJC15	2.06484e-08	-0.14
SE	PINX1	0.0241618	-0.397
SE	SEC14L1	0.000595412	-0.586
SE	RANBP3	0.000667624	0.171
SE	ANKRD24	0.026368	-0.104
SE	PIP5K1C	0.0033528	-0.155
SE	NFIC	0.0132417	-0.273
SE	NFIC	0.00306481	-0.398
SE	DAZAP1	0.0109156	0.115
SE	TMEM41B	0.0144609	0.118
SE	RPS24	2.71956e-13	0.291
SE	SORBS1	0.000116861	0.121
SE	MPP2	0.0423162	-0.33
SE	UBC	0	0.65
SE	SERPINA6	0.0477304	0.131
SE	DDX24	2.28596e-08	0.213
SE	TXNL4A	0.0097837	-0.217
SE	CAMTA1	0.0137118	-0.203
SE	MLH3	0.0438213	-0.122
SE	PLEKHM1	0.00617156	-0.396
SE	TLN2	0.00115749	-0.362
SE	AUTS2	0.000130167	-0.269
SE	AUTS2	0.00193131	-0.12
SE	PEX19	0	0.391
SE	PAM	0.0324357	-0.117
SE	RAI14	1.83837e-05	-0.165
SE	GOLPH3	5.68413e-07	-0.173
SE	NCOA2	0.00545007	-0.311
SE	WTAP	0.0396526	-0.192
SE	SYNE1	0.00092953	-0.439
SE	KLHDC3	0.00929658	0.124
SE	KLHDC3	3.03237e-05	0.275
SE	KCMF1	0.00178136	0.102
SE	BCLAF1	3.36504e-05	-0.28
SE	BCLAF1	3.89152e-05	-0.268
SE	MRPS18B	2.21385e-05	-0.141
SE	COLEC11	1.90414e-05	-0.14
SE	SLC5A6	0.00509429	0.343
SE	SLC5A6	0.0241618	0.173
SE	PPM1B	0.0267356	0.127
SE	PRPF38B	0.0297217	-0.222
SE	SLC26A2	1.28956e-10	0.175
SE	SLC26A2	3.03247e-10	0.181
SE	SLC26A2	3.81099e-10	0.178
SE	MBL1	0.00503873	0.381
SE	USF3	0.0410946	-0.121
SE	FTCD	0.0432946	0.337
SE	NONO	0.00664336	-0.147
SE	KIAA1191	0.00386951	-0.227
SE	SNRPC	3.92412e-05	0.237
SE	CLK4	0.0183206	-0.322
SE	TPD52L1	0.0226898	0.138
SE	ARHGAP45	3.18958e-05	-0.212
SE	UBE2E3	0.0491695	-0.144
SE	KAT2B	0.000235609	-0.184
SE	MAPK3	3.22965e-05	0.243
SE	MAPK3	7.40461e-05	0.233
SE	MAPK3	0.00354715	0.221
SE	MAPK3	9.63514e-05	0.225
SE	ARPC1A	2.46576e-08	0.224
SE	ARPC1A	0.000629402	0.117
SE	SRRM2	6.18878e-06	-0.389
SE	SRRM2	0	-0.125
SE	SRRM2	0.0257498	-0.132
SE	EPHA10	0.00104306	-0.279
SE	PLA2G3	8.36634e-07	-0.291
SE	PLA2G3	0.00242865	-0.188
SE	CYP2D17	0.0366863	0.324
SE	CYP2D17	0.0381225	0.307
SE	ASPG	0.0120305	-0.132
SE	ASPG	0.00564986	-0.135
SE	ASPG	0.0176976	-0.128
SE	SLC41A3	0.00516606	0.242
SE	PCBP2	6.84972e-05	0.134
SE	KNG1	0.00292296	0.19
SE	TMEM50B	7.60376e-06	0.227
SE	C1ORF210	0.00311454	-0.404
SE	C1ORF210	0.0352211	-0.285
SE	PSMA2	9.07643e-08	-0.137
SE	RCL1	0.0427252	0.207
SE	RCL1	2.15972e-08	0.313
SE	SLC38A4	0	-0.184
SE	SLC38A4	2.6722e-11	-0.29
SE	SLC38A4	0	-0.182
SE	SLC38A4	1.92303e-10	-0.283
SE	FETUB	0.0098502	-0.126
SE	LUC7L2	0.0210404	-0.425
SE	RPS25	9.64382e-14	-0.198
SE	RPS25	9.64382e-14	-0.141
SE	SRSF6	0.0176771	-0.236
SE	SRSF6	3.328e-05	-0.394
SE	SRSF6	3.03338e-05	-0.326
SE	TIGD5	0.00333069	-0.139
SE	ASGR2	3.63882e-07	-0.128
SE	AKT2	0.0336955	-0.191
SE	GALNT11	0.0280112	-0.31
SE	GALNT11	0.00092577	-0.44
SE	NDRG2	0	-0.223
SE	CRK	0.00132213	0.433
SE	GSTA2	0.00100314	0.104
SE	GSTA2	0.0499534	0.407
SE	MFSD11	0.00030585	-0.191
SE	NUDT7	5.37945e-09	0.273
SE	SWI5	0.00509429	-0.182
SE	LSM14A	0.00244534	-0.152
SE	SCARB1	0.020949	0.235
SE	KYAT1	0.0393642	0.269
SE	KYAT1	0.000258666	0.311
SE	KYAT1	0.00769909	0.281
SE	ABHD5	1.47635e-07	-0.293
SE	ARRB2	0.00200486	0.343
SE	F13B	0.0176631	0.156
SE	F13B	0.0367084	0.141
SE	ATG4A	0.0224745	-0.461
SE	DNTTIP1	0.0124437	-0.388
SE	DNTTIP1	6.97375e-07	-0.651
SE	IDH3G	0.00314034	0.164
SE	IDH3G	6.65258e-05	0.181
SE	VPS39	0.0120026	0.135
SE	NAA60	2.89512e-10	-0.352
SE	NINL	0.00341833	0.132
SE	IFT20	0.0295109	0.31
SE	IFT20	0.011613	0.338
SE	DCXR	2.23413e-05	-0.238
SE	DCXR	9.41575e-07	-0.234
SE	NAA20	0.0272502	-0.143
SE	MAPK14	0.000472091	-0.111
SE	MAPK14	0.00170013	-0.104
SE	HNRNPA2B1	2.16949e-07	-0.346
SE	NDUFA3	0.0140651	0.368
SE	NDUFA3	0.0351107	0.334
SE	MRPS14	0.0013001	0.115
SE	FAM210A	0.0075616	-0.287
SE	TMEM230	0.0163857	0.107
SE	RNF126	0	-0.144
SE	NBR1	0.020474	-0.202
SE	UBE2V2	0.00485103	-0.204
SE	GK	6.65258e-05	0.199
SE	UGT1A6	1.92193e-07	0.137
SE	ALYREF	1.66106e-05	-0.115
SE	PXMP2	0.0402817	0.127
SE	SNRNP70	1.94254e-12	-0.251
SE	SNRNP70	5.33551e-10	-0.23
SE	MTMR14	0.000131728	0.44
SE	THRAP3	0.00968638	-0.411
SE	NSD1	0.0260455	0.116
SE	APOC1	0.00985571	0.164
SE	APOC1	0.00763201	0.167
SE	RBM39	0.00508033	-0.349
SE	ITIH4	4.5932e-10	-0.462
SE	ITIH4	0.000667624	0.394
SE	ITIH4	0.00269698	0.377
SE	ITIH4	0.0023445	0.378
SE	MASP1	9.35327e-06	0.122
SE	STX8	0.000351294	-0.281
SE	STX8	4.89213e-05	-0.31
SE	GK5	0.00563924	-0.214
SE	CFH	2.68018e-06	-0.143
SE	HYAL1	0.00662355	0.137
SE	HYAL1	0.007712	0.13
SE	FN1	0.00394114	0.101
SE	FN1	0.00977854	0.203
SE	MFF	0.0132417	0.24
SE	RAB23	0.0186909	0.209
SE	PYDC3	5.89579e-07	-0.123
SE	IL11RA	0.00637014	-0.117
SE	IGF1	2.32534e-10	-0.153
SE	TENT4B	0.00990106	-0.477
SE	TYMP	0.0194346	0.196
SE	AFDN	0.0394337	-0.316
SE	AKAP8L	0.00244788	-0.109
SE	AKAP8L	0.00109617	-0.193
SE	AKAP8L	0.00049544	-0.179
SE	CELF1	2.63117e-06	0.255
SE	CELF1	3.35662e-05	0.51
SE	GLS2	2.82494e-05	-0.447
SE	GLS2	5.54767e-05	-0.445
SE	GLS2	7.34527e-05	-0.41
SE	GLS2	1.18072e-05	-0.461
SE	GLS2	4.86809e-05	-0.44
SE	CRYZ	1.23097e-06	0.219
SE	CRYZ	4.96391e-06	0.196
SE	CRYZ	1.27049e-08	0.194
SE	AGTRAP	0.0234125	0.238
SE	AGTRAP	0.0118756	0.239
SE	RPL22	0.0162879	0.157
SE	PAXX	0.0450706	-0.221
SE	ASS1	4.78609e-09	-0.205
SE	ASS1	7.98966e-12	-0.182
SE	ASS1	2.70212e-10	-0.192
SE	ASS1	2.98698e-10	-0.192
SE	ORM1	0.000118367	-0.232
SE	ORM1	0	-0.297
SE	ORM1	4.34383e-06	0.172
SE	ADPGK	0.000104118	-0.198
SE	CDC37L1	0.0346206	-0.262
SE	IRF2	0.00114706	-0.289
SE	SLC7A2	0	0.103
SE	SLC7A2	4.08953e-06	0.344
SE	SLC7A2	9.61976e-05	0.335
SE	SLC7A2	1.00743e-05	0.331
SE	SNX6	0.001399	0.147
SE	OTC	0	-0.248
SE	SHFL	3.62118e-08	0.153
SE	ENTPD4	0.0433392	0.277
SE	BRD8	0.00572086	-0.349
SE	NFIC	0.000188749	-0.443
SE	TMEM41B	0.0144113	0.121
SE	NCOA4	0.00172625	0.119
SE	OGA	0.0113798	0.344
SE	DENND10	0.0403711	-0.163
SE	MTG1	0.0125431	-0.242
SE	SERPINA1	2.52397e-06	-0.431
SE	SERPINA1	2.63117e-06	-0.43
SE	SERPINA1	3.14808e-06	-0.429
SE	SERPINA1	5.11749e-06	-0.426
SE	SERPINA1	0.00591858	-0.39
SE	SERPINA1	0.00593481	-0.39
SE	SERPINA1	0.00581651	-0.389
SE	SERPINA1	0.00825485	-0.382
SE	SERPINA1	0.00333069	-0.125
SE	SERPINA1	0.0281701	-0.196
SE	SERPINA1	0.0360874	-0.194
SE	PLEKHM1	0.0104932	-0.452
SE	RNASE4	2.78745e-06	0.154
SE	RNASE4	7.69686e-13	0.261
SE	RNASE4	7.60376e-06	0.135
SE	RNASE4	2.61125e-10	0.241
SE	RNASE4	7.60376e-06	0.244
SE	RNASE4	0	0.219
SE	RNASE4	0.000546878	0.204
SE	RNASE4	0	0.203
SE	NIPSNAP2	5.68413e-07	-0.143
SE	PEX19	2.27714e-07	0.126
SE	KLHDC3	3.03247e-10	0.259
SE	KLHDC3	0.00710102	0.141
SE	KLHDC3	0.00346838	0.147
SE	KLHDC3	0.0150842	0.122

## Sheet: DSGs in each comparison
Brain	Liver		DSGs shared between Brain and Liver
TAF1B	ABCG8		SLMAP
ZNF513	PPM1B		PIGX
MPEG1	SFXN1		GLT1D1
SBF2	DELE1		STOX1
JAM2	AMOTL2		ARRB2
CLCN2	ACSM5		CLK4
DELE1	REX1BD		SALL1
DDX46	SRRM2		RPS18
GDAP1L1	USP7		UBE2G1
RBBP5	PALB2		CYCS
ILK	BCOR		DAZAP1
REX1BD	MED13L		REEP6
SRRM2	IFI27L1		UBB
AGAP3	YPEL1		PAPOLA
MC1R	ERICH1		FBH1
PDILT	KNG1		CXADR
GIGYF1	RCL1		STK25
ACTN4	SLC38A4		STX8
RHBDD3	PTBP2		PCGF3
IFI27L1	CIART		EIF4G3
ATG2B	SRSF6		GNAS
VSIG8	NDRG2		MRPL52
OSBPL2	ST3GAL4		MFF
FRMPD1	MBD1		MTRR
MAP4	CRIP3		TRUB2
ZBED6	PLEKHH3		CYRIB
PHC1	PFKFB1		ATAD1
COBLL1	SLC30A10		MFSD11
NKTR	TARBP1		YME1L1
MED1	TLK2		CPEB3
CREG1	ATP6V0A1		PCBP4
HIPK2	RPL22L1		SRSF11
ARFRP1	IRAK2		CAMTA1
TFAP4	CCNL2		DENND1A
GPR155	C19ORF47		ATP11C
ZNF33A	SLC4A2		CELF1
CA11	FMR1		ASS1
EPB41L3	RCN3		TMEM59
MBD1	THOC5		NCDN
PTGES2	NCOA6		LRRC8A
WRAP53	ARFIP1		TRIP12
HCFC1	ESD		USP19
LSM14A	SLC35C2		PRXL2C
CCNL1	TAF9		QKI
COASY	SNRNP70		TMEM14C
AZIN2	CAMTA2		ATF1
DEDD2	TFG		PICALM
INTS8	TMEM104		BRD8
NUDT14	CLK2		PHF1
STX16	FDPS		ASH1L
HNRNPDL	RBM39		PSMF1
ZSCAN4	PARP3		IFI27
PEG3	DAB2		PRPF39
CASK	RETREG3		KIN
WDR13	TSPYL2		EXOC1
RUFY2	CXADR		MTG1
FGF1	LIN54		TPT1
PHF20L1	PCGF3		PACSIN3
PPP1R3F	FGFR3		NDRG2
FMR1	LDB2		DCTN1
APBB3	SULT1D1		R3HDM2
STK19	CLOCK		OSER1
SLC10A3	ITIH2		RBM26
ACHE	NDUFA9		PARK7
PRDM8	TNS2		DNAJC16
CDPF1	KDM8		ZMYM5
RCN3	IKBIP		RABGEF1
SHANK1	TENT4B		AURKAIP1
CHD7	CYP1A2		PPOX
CPSF4	OSBPL5		CRCP
NCOA6	CHKA		TAF9
PRR29	ABCC5		DCAF11
TP53INP2	ZNRD2		ACADVL
KLK8	CTNND1		UBE2D3
RBAK	PACSIN3		PPFIBP1
TAF9	UBR4		SAT2
ZPBP	PAXX		ATXN7
NUDT3	SERPINA5		FOXRED1
RCOR3	IL1RN		NUDT22
SNRNP70	EIF4G3		ITIH3
MSANTD2	ARHGEF18		ALG9
MGAT5	HNRNPA1		BSDC1
SUPT20H	MTG1		TXNL4A
ECI2	KLC1		SLC19A1
CLK2	SRSF5		MAN2C1
PLAA	MTSS2		ARPC1A
AARSD1	BRD9		SLC35A1
TTC13	NEIL1		PIP5K1C
PSIP1	HACE1		GPT
GIMAP8	PARK7		NCOA6
TGFBR1	CILK1		TMEM62
MMP24	TREX2		TARBP1
UNC45B	SLC26A8		BIN1
RFC3	CFB		ALS2
LSR	SLC5A6		SLC22A5
CXADR	SF3B1		CHTOP
UBAP2L	PRPF40A		MMTAG2
NCOA3	COL18A1		FAM20B
SPHKAP	CBR1		TMCO6
PRMT7	PLD3		FAM3C
SCLY	PAH		PAM
PCGF3	HIGD1A		GAREM1
TMEM175	CYP2D17		ABHD5
CTBP1	GSTZ1		SMAD2
HIF3A	HPD		ZDHHC1
FBXO7	ABHD4		FOXJ3
RSRP1	COPS2		MRAS
ADAM17	GLT1D1		ACTR3B
KIF22	NOSTRIN		FMR1
PRXL2A	ASGR2		RIPOR1
ENAH	SULT1A1		GSTM1
NBN	F13B		MIER2
PHC3	IDH3G		HNRNPA2B1
KDM8	HPX		RNF126
COG1	C2CD2L		GTF2A2
PODN	ASGR1		KLHDC3
NRXN2	ECI2		AKT2
CHKA	APOC1		NIPSNAP2
ZNRD2	ITIH4		PUS3
ZNF467	PIPOX		UBAC2
TUT1	VEGFB		PCNP
IL16	PON2		KYAT1
STX3	TF		RPL34
CELF1	PDLIM5		CCNT1
HIPK1	REN		TMEM50B
RBCK1	ARF3		OSBPL1A
LRRC40	HAL		GOLGA2
AMY2A	NXF1		ABCC5
TRIT1	KIF1C		AFDN
GYG2	GLS2		MAP2K7
DNM1	ZNF259		TRMO
GOLGA5	APOC3		UBE2H
SRSF11	HYI		MTDH
ERMARD	SLC30A2		PCMTD1
NOLC1	PZP		SYNE1
SGTA	CYP2C21		C2CD2L
SLC39A3	PROZ		TCEA1
HNRNPA1	FGG		JMJD4
DLG5	SHFL		ST3GAL4
MTG1	NOXO1		MTA1
KLC1	MTA1		OSBPL9
CAMTA1	SERPINA13P		IDH3G
PCNP	SERPINA1		LUC7L3
HERC1	ASL		CAMTA2
SLTM	SULT3A1		SP3
ARHGEF40	PRPF38B		AKAP8L
POLR1H	MIER1		ZNF106
PPP4R3B	GLI4		RNPS1
ERCC8	JMJD4		STK19
SLC45A2	UBE2E3		SEC11A
BAK1	RABGEF1		ARL6IP4
GABBR1	CYP2C18		JUP
TMEM18	PHAX		STK11
CYRIA	ANAPC13		DCXR
AHSA2	IGSF9		ACP1
RALGDS	HSF2BP		LSR
PLD3	CYCS		AGAP3
VDAC1	C1ORF210		ADAM17
CCT8	SLC19A1		PPP1R11
CCNT2	CPEB3		USP5
COX20	TLCD2		CD47
CIAO2B	PTBP1		PYDC3
MAPK3	CRK		RBM39
MFSD12	MME		CNIH1
HSD3B7	FAM3C		SWI5
NARS	HGFAC		ZNRD2
ABCA3	HNRNPH3		PCBP2
LY6H	SEMA4G		RNF181
HIGD1A	GNE		AFTPH
ATP6V0B	CLASRP		ADPGK
MRPL4	CYP4F3		ERICH1
GLUL	ASH1L		ZMPSTE24
TRIM46	CYTH2		PSMB3
MINK1	EXOC1		RPS25
SEH1L	ARL6IP4		WRNIP1
PUS3	ZNF276		TLK2
TNK2	HNRNPA2B1		TESK2
ARL3	NIT1		ZFAND2A
HSF4	KLHL12		SCMH1
E2F4	JUP		ALKBH6
ERAL1	SEC11A		CYB5A
LDHD	ATP8B3		PLEKHA5
NDRG2	TRIO		EPHA10
AP1S2	AURKAIP1		MOCS2
DUS3L	RPL34		AUTS2
MFSD11	WSB1		TCN2
ULK3	MCRIP1		RNF123
SWI5	NAA35		SRRM2
CIC	NFE2L1		HNRNPA1
NCKAP1	ZMYND11		AKT3
PSAP	TRIP12		RUFY2
TNNT1	SLC2A9		MBD1
CORO6	SEC31A		RCN2
ZNF512B	ABCB4		PPP1R7
SPNS2	ARGLU1		KAT2B
CANX	TSNAX		VEGFB
IFT20	TNFAIP3		HYAL1
KMT5C	CHPT1		PNP
NACC2	TXNRD1		RCN3
DCXR	NFATC1		CHPT1
UBA52	TMEM242		RIDA
HNRNPA2B1	C11ORF24		ILRUN
TCERG1	AKAP8L		LDHD
ZNF354C	SCMH1		IFI27L1
NIT1	ST6GALNAC2		FKBP7
RAPGEFL1	YAP1		PHKG2
RCN2	DDX6		LIN54
IQGAP1	RNPS1		SNRNP70
LY6E	FBXW5		RALY
ACAA1	STK25		ST3GAL1
HFE	FBH1		MAPKAP1
KIAA0100	ENTPD8		LGALS1
CNTN2	SRSF11		HDAC5
PLD2	NAXD		GSTA4
ATAT1	ELOF1		LSM14A
MBD3	CDK16		COMMD2
CAPN10	STK11		ALDH4A1
SPARC	MRTFA		ACOX1
COMMD3	NNT		CLK2
AHSA1	HNRNPC		PPP6R1
NRBP2	MOCS2		POLR2I
GPT	MTRES1		PLXNB1
FASTK	CDO1		SFSWAP
PIP5K1A	HAGH		PIH1D1
MRPL54	NECAP1		CCM2
KLC2	CDC42EP1		EMG1
DPY19L4	STAT1		CZIB
PAN2	APOE		FADS2
LRRC8A	ARG1		RPL22L1
CNPY2	MRPL11		BMERB1
RGL2	LUC7L3		CPNE2
PLEKHA5	NUB1		USP54
ATN1	RGS14		NR3C1
RPS6KB2	RBIS		TM2D3
ARHGAP33	P4HB		SH3BGRL
ABCA7	HYAL1		DELE1
CD81	UBE2D3		IQUB
TSSC4	NDUFS8		CCNL2
PITPNM1	APOA1		EIF2S3
ANKRD13D	NCDN		LUC7L
AKAP8L	PPP1R11		GGPS1
TRIM3	COMMD6		SLC1A2
ATF6B	TXLNA		HIGD1A
POLR2E	LAPTM4A		FGFR2
SNRPN	RAB10		AMY2A
LZIC	ATRAID		PRELID3B
RNPS1	MEMO1		RWDD3
NADK	HAAO		PDK2
AJM1	USP34		ATN1
VCP	AFTPH		MPZL1
IZUMO4	PCYOX1		INTS10
TIRAP	SUCLG1		MPP2
BMP1	TXNDC9		PCYOX1
SLC8A3	MTX2		SETD6
STXBP1	SP3		GARNL3
PTPRS	KYNU		KDM8
MIER2	CTSF		SNX2
TMEM259	SLC38A3		MTSS2
PPP3CB	NIT2		SLCO1A2
SEPTIN5	CD47		MT2
MTA1	LRRC58		PRDX5
CALY	SEC22A		LENG8
CEP170B	ATP13A3		NDUFB6
AP1G2	RWDD3		NXF1
MTSS2	IL1RAP		DNAJC12
TNPO1	ATAD1		SCARB1
MYO9B	TC2N		GRAMD4
CLIP3	HNMT		PTPA
RIMS1	GRID2IP		DDX46
FANCE	CREBRF		NFIC
EHMT2	KIAA1191		PRPF38B
VWA7	KMO		SLC35C2
BHLHB9	RNF130		SPCS1
LDAH	SLC25A48		CHKA
UGP2	BIN1		TXLNA
FBXO41	ITIH1		PRXL2A
PRPF38B	C4A		THAP3
SPICE1	TRPC4AP		HNRNPH3
SF3B1	TPD52L1		ARNTL
ACAD9	MRAS		MARCHF7
PGGT1B	ACAD11		TLE5
SDF4	ACP1		PBX3
NR4A2	GC		TFG
FAXDC2	MS4A6A		ECI2
STAMBP	ALDH1A1		EIF4G1
JADE2	PROS1		HNRNPC
AVPI1	HSD3B7		RANBP3
MRAS	DECR2		SCLY
PHC2	NET1		DHX9
LASP1	UPP2		BTF3L4
ARMC5	COPZ2		CLK1
CLCC1	CD302		HSD3B7
USP31	FBXW8		PSMA2
FBRSL1	ADK		RTN4
RPH3A	ZFAND2A		CHCHD3
CIT	GAS2L1		TREX2
POP5	PISD		RBM12
PXN	PROC		PAXX
RAB36	SLC41A3		DPP3
MAPK8IP3	PLG		ZNF276
HYLS1	PCBP2		GYAR
AMPD2	MBIP		CACNB4
FAM20B	YME1L1		ELP5
HUWE1	ACSL1		UGDH
ANK3	COP1		SLC5A6
CYCS	MPZL1		NOP56
RBM11	MT2		SUMO2
SH2B1	TANC1		DENND10
DMTF1	BHMT2		NFIB
PUS7	UBE2E1		SORBS1
RUVBL1	MTRR		ATRAID
FAM162A	ZNF654		DHPS
RPUSD4	BMERB1		TOX4
EIF3C	DENND5B		EIF4A1
SPRING	GGPS1		YIPF1
WDR27	PON1		NAXD
ZNF34	PSMA2		ABI1
SLC35B3	CNIH1		HNRNPDL
PLP1	LANCL3		HOOK2
PSME3IP1	PIGX		CLU
ZNF23	PLBD1		ETHE1
ACAP2	SMAD2		HNRNPM
ZNF484	RIDA		LDB2
ARRDC2	PUS3		SF3B1
FAM3C	SDHC		PCM1
NTAQ1	PHYH		MAPK3
RPL38	AGXT		USP34
ITPKC	NTAN1		RETREG3
KLHL32	KHK		ELOF1
CUL1	USE1		SORD
RBBP8	ACOX2		C7ORF26
PAIP1	VAMP7		RCE1
PIAS4	SND1		NIT1
FAM98C	TXNDC17		SCAMP1
MPPE1	KLKB1		TSEN34
CTU2	TRIM44		AP3S1
ZNF706	FGFR2		RAB5C
BEAN1	SH3BGRL		WTAP
TRA2A	ACTR3B		MLF2
PANK2	GPX3		BAP18
UBA1	HDAC5		PRRC2A
LGALS8	CERS2		MLLT10
EXOC1	WIPI2		CADM1
MTRF1L	PSMD9		SUPT20H
POLR2I	DGAT2		ST6GALNAC6
KLHDC4	ABCB11E		DMAP1
ARL6IP4	ZDHHC1		SDHC
OSBPL1A	C4BPA		SLC41A3
SLC27A5	AKAP7		MBIP
RBM15	USP25		CREBRF
SLC6A6	AGPAT2		ZMYND11
ZMYM5	GCSH		KLC1
PIP4P1	GALNT11		NIT2
TLE3	FGD6		PTBP2
RBM12	ASCC2		NCAPH2
DPH1	CZIB		OGA
ACSF3	REEP6		CDK19
KAT6A	XRN2		GALNT11
WDR93	TMEM59		SHARPIN
ACSBG1	KYAT1		PLD3
GPAT3	GYAR		DPY19L4
ZMYM3	ABHD5		CUX1
ALS2	KDELR1		NNT
GRM1	EIF4G2		RNF130
NR3C1	GAS2		UCHL5
SUPT6H	PRXL2C		SAE1
ZFP90	CRYL1		SUPT6H
RNFT1	EIF4G1		UBE2V2
MTMR4	RNF128		CARD19
AURKAIP1	GPX4		ZZZ3
RPL34	CTSH		SRSF5
SOCS7	RILP		IFT20
AMZ2	PANK1		REX1BD
REPS1	PDK2		DPAGT1
MYT1	AMDHD1		DGCR2
MORC4	TOX4		OGDHL
ARMCX4	EIF2S3		TIGD5
UMPS	ERGIC1		FGD6
ACCS	HNRNPDL		SLC25A48
NDUFAF6	KLHL23		FDPS
ZMYND11	SLC25A15		CP
CD63	SLC22A5		MISP
SLC24A4	UGT2B31		PISD
TRB	ZNRF2		PHF21A
CHCHD7	ITIH3		UBC
HDLBP	CD36		IL11RA
TMEM129	F2		OSBPL5
SSBP4	LAPTM4B
LDB2	ATG4A
PXYLP1	ATP5MC3
DYNC2LI1	ESRRA
OCIAD1	B3GALNT2
PRKAR1B	MAOB
FN3K	ALB
ZFAND4	RUFY2
PYM1	RPS11
CSRNP2	RCBTB1
PFKM	CAMLG
RIMKLB	GCGR
FBXO6	XPNPEP1
COPS7A	UGDH
CHPT1	CCNYL1
UHRF2	PPP6R1
CYFIP2	TK2
CRY1	NDUFS4
FAR1	IQUB
P4HA3	POLR2I
SHISA5	ADCK2
MPPED2	DCP1A
SPACA6	CHD9
AGA	DYM
COL27A1	DCXR
HP1BP3	RSL1D1
DVL1	CFI
RAB3D	OSBPL10
ZER1	SLCO1A2
CNTRL	SLC47A1
ABITRAM	FBP1
GALNT12	TAT
NTRK2	UBE2H
RFK	MAOA
APBA1	OSBPL1A
TTC39B	BSDC1
PPP1R11	PSMB3
FAM117A	CCDC91
NAXD	XBP1
FBXL3	ENY2
MFN1	SPCS1
ELOF1	CP
PLPPR2	UGGT1
SIPA1	ATF1
MADD	ABCA6
STK11	PRELID3B
KCNMA1	ATP9B
LCOR	CYB5A
PCDHGC4	PPP1R7
KCNIP2	A1CF
TSPOAP1	TMEM230
GFRA1	ST6GALNAC6
EMC9	AFMID
DIO2	PSMF1
NNT	ACOX1
MAP1A	AKAP10
DCAF11	RNF125
IPO4	RNF126
PARP6	TMEM205
AUTS2	DPYD
SRSF5	FGA
ZNF789	SLC12A4
MOCS2	SGK2
ATPSCKMT	C9
WTAP	UBE2V2
SGK1	PLXNB1
PARK7	UBXN8
TREX2	IL13RA1
GRM4	GK
PHRF1	RCN2
PPIP5K1	SUMO2
TTC3	USP5
FSD1L	ZFAND6
BIN1	PXMP2
ARL6IP5	MAPKAP1
PXK	SLC17A4
GALE	C6
VIPR1	ALS2
CAPN15	EIF3E
EPHA10	PEMT
FAM174B	RBPMS
HPCA	OGDHL
PPP1R13L	RABL3
LUC7L	ELP5
CNNM1	GAMT
TTYH1	NR3C1
PPP1R1B	UBE2G1
ACSL6	MRPL13
ATP5ME	RPL12
LAS1L	WDR81
SRCIN1	LGR4
DUSP22	DGCR2
PQBP1	PHF21A
DPF1	ALDH1L1
CABIN1	FAM91A1
GPS1	TLE5
ASH1L	SORD
DPP6	SNX2
CCNL2	HSD17B4
MTG2	CHTOP
KMT2E	TCAIM
PHKG2	ANAPC16
TTC23	CPS1
SCN2A	TCN2
CX3CL1	EMC2
APLP1	SLC22A18
ZBTB18	CFH
ARHGEF11	UCHL5
PCED1A	F5
USP19	ITGAL
LUC7L3	COMMD2
KIFC2	LSR
PNPO	SETD6
RPS8	AKT3
SLITRK2	ERO1B
PPFIA4	ADAM1A
ATP2B1	PCBP4
LMO4	YWHAQ
BACE1	MTDH
SLC17A7	CDK19
ITGB2	RETREG1
HMBS	PCMTD1
PPP6R2	CYP3A12
UBE2D3	QKI
DDX17	SEC11C
PACSIN3	MFF
FBF1	FOXRED1
LSM14B	CPNE2
SLC66A1	SCLY
ATP13A2	SUCLG2
GRIN1	FGFRL1
UNC13B	SLC22A9
SV2B	ACADVL
LSM1	PCM1
CAMK2D	BDH2
PEX6	ADH4
SLC19A2	MRPL1
FDX1	ADAM17
OPALIN	MTTP
PLEKHH1	RBM47
MZT2B	RPL9
LINGO1	KIN
PAM	PRXL2A
POC5	NME6
ACOT4	SLC39A14
NDUFS6	LRRC8A
KLHDC3	CHCHD3
DDX39B	ZCRB1
EIPR1	IL11RA
PDIA6	A2M
SMC6	C1RL
DNMT3A	ATN1
TMEM214	LTBR
ATRAID	FTH1
PIGF	SLC41A2
MCFD2	STAB2
USP34	LGALS1
FANCL	APBA3
AFTPH	GRAMD4
SPRED2	TBC1D22A
ZNF638	EDC3
CHMP3	DPP3
MGAT4A	SLC25A45
CRACDL	NUDT22
UNC80	FADS2
MYO1B	ETHE1
RBM45	CELF1
SP3	PSMC3
PKP4	ARNTL
GRINA	HERC4
TMOD1	ZNF215
FTO	ALDH4A1
FAM168A	STARD10
CD47	SLC9B1
IQCB1	TMEM135
AGAP1	CTSC
TMEM41A	SLC36A4
USP16	COL13A1
COL9A2	NT5E
TENM2	WRNIP1
RWDD3	FBXO9
TBL1XR1	HNRNPM
ATP6V1H	CTBS
CACNA2D2	CRYZ
TRNT1	SMU1
SYNJ1	ANGPTL3
AP1B1	FGGY
ATAD1	C8B
ADAM22	YIPF1
ARL2BP	SCP2
HDAC11	ECHDC2
SFXN5	OSBPL9
MED13	RPS16
BNIP1	UQCRH
CREBRF	TESK2
ZNF213	AMY2A
CAMK2A	HNF4A
PPP2R2B	TMEM269
RELL2	FOXJ3
RNF130	ZMPSTE24
SLC25A48	MFSD2A
FSTL4	THAP3
RAB2A	CNOT6L
KCNJ6	LBP
CDC42SE2	TMEM14C
PLPP4	STK24
ABI2	ADH6
CLK4	MASP2
JMJD4	SLC1A2
GMPPB	MLF2
SLMAP	ASS1
CACNA2D3	HRG
CAMK1	PTPA
MARCHF1	TRUB2
ATP2B2	PBX3
NEIL2	SLC25A32
TENM1	GARNL3
TFDP2	SAE1
NELL1	DENND1A
RPS2	C5
ACP1	DPAGT1
TOP2B	ORM1
MLH1	PRDX5
RABGEF1	NDUFB6
HMGXB3	ADPGK
SCAP	KIAA2026
SGMS1	GALM
RHOA	MFSD14B
DAG1	KATNA1
APEH	SPART
FBXO44	FRG1
CDH10	SLC7A2
CHL1	HOOK3
PDZRN3	DNAJC3
WDR19	CLPX
RNF41	DNAJC15
PLPPR4	OTC
URB2	TDO2
MYRIP	TMEM62
ABLIM3	HPGD
CEP170	GCDH
CLU	DHPS
TSC2	UOX
BTBD3	MVB12A
GLYR1	AP3S1
RBFOX1	DHRS3
GRIN2A	FGB
PCBD2	C3
RERE	NFIC
PRKCB	ATXN10
EPHB1	GLUD1
ZNF385A	CDC123
ST3GAL5	USP54
LRRC43	GSTM1
REEP5	DNAJC12
RANBP9	LIPA
HPS3	PIK3AP1
ZFAND2A	ADAM9
INPP5J	PAPOLA
PISD	IFI27
FBXL6	RIN3
SGSM1	RNF181
ERICH1	PCNP
ARVCF	SMOC1
SLC41A3	GCH1
FEZ1	RALGPS2
GABRA3	TLN2
FBXL2	GTF2A2
NTM	LIPC
PAFAH1B1	SQOR
UBE2E2	ZNF106
STX18	MIA2
PCBP2	DHX38
MBIP	CRCP
SLC24A3	AUTS2
RGL1	POR
YME1L1	CUX1
ASTN1	COPS6
ILDR2	MACIR
MT2	PPIP5K2
BOD1	ELL2
CLASP1	TARBP2
IMMP2L	BHMT
ANLN	SCAMP1
MLLT1	SLCO2A1
MTRR	FZD3
WIPF3	GHR
TAX1BP1	AGXT2
BMERB1	STT3B
GGPS1	GOLPH3
TBCE	MARCHF6
VPS50	NCOA2
VAMP4	HLA-DRA
PPP2R3A	UBE2B
TMEM50B	PIH1D1
MYT1L	MLXIPL
PSMA2	MANEA
NRCAM	SLC35A1
PIGX	PTP4A1
SEC61A1	SLC29A1
EEFSEC	ZFAND3
MTCL1	ILRUN
GAREM1	RPS18
IFTAP	RTN4
FHOD3	PPARA
SRPK2	FTCD
SMAD2	CLU
DIP2B	GGT1
AUH	AASS
RIDA	GPLD1
KDSR	VTN
MLIP	HPN
SDHC	GAREM1
AMPH	RAD23A
RALYL	FETUB
KDRL	PIGR
ARMC1	ACSL4
YTHDF3	RDH11
GLT1D1	LDHD
TMEM68	AUP1
ST18	HSP90B1
CARMIL1	GSTA2
PTBP2	GNMT
PLPPR5	MARCHF7
PRKCG	GAL3ST1
SMOX	SLC37A4
BRINP1	PATR-A
CD46	OSER1
MRPS34	PSMD1
ERICH2	SHBG
DDR2	AHSG
PDE4DIP	TRPV2
DBN1	ERP44
CCDC9B	MOGAT2-B
RNF216	TCEA1
PPCDC	RBP4
MTMR3	SEPHS1
KLHDC10	PDCD5
DCTN1	EMG1
MMP16	SLC22A6
PEX11B	SIRT3
HACD2	PNPLA2
DNM1L	IL6ST
SLC2A11	CADM1
TSPAN7	ALKBH6
SKIV2L	ZZZ3
SH3BGRL	SLC31A1
ACTR3B	CYRIB
ELMO1	UBAC2
MMD2	TMEM219
HDAC5	OAZ1
PGS1	HABP2
ANKRD12	SSR3
TIPIN	DHRS7
ZNF512	RNASE4
ALG11	PAM
ZDHHC1	ABI1
TMCO6	TMEM87B
ZNF19	CLK1
PRMT8	DDX46
DOK4	GDE1
BCAR1	RBM5
CDYL2	SFSWAP
STPG1	ACY3
DRP2	PYGO2
REPS2	ARMCX3
AKT2	C9ORF64
GALNT11	CD1D
KLHL36	MINDY1
GDPD1	TMCO6
PIGK	SALL1
PLAAT3	PPP4R2
DGKG	TSEN34
CADPS	ST3GAL1
PJA2	SLC45A3
RSAD1	C7ORF26
EPB41L1	SWI5
FGD6	AKAP17A
CELF4	PRRC2C
ZNF805	TTPAL
SHISA7	FIGNL1
GINS1	PLAUR
RYR1	RPL10
ZDHHC20	TSEN54
RASIP1	UBB
GABRG2	ULK2
R3HDM4	ASPA
ST3GAL4	ATP11A
EIF3H	NR5A2
CZIB	MASP1
MICAL2	MMTAG2
SH3BP5L	MBNL3
GRIK5	NR1H4
MIEF1	DMAP1
RABEP1	MTHFS
MARK2	ALG9
SLC24A2	ATP5F1D
MARCHF7	ADPRS
ZC3H7A	S100PBP
DPCD	DDX5
GNB1	DNAJC16
KCNT2	INTS10
EGLN2	TPT1
KCNIP4	ADAMTS13
DNAJA3	INSR
TSPAN11	GTF2F1
SCARB1	FRMD4A
TSNAXIP1	MIER2
TIAM1	CGREF1
STK32A	DCAF11
PC	PRPF39
KYAT1	NSUN5
HSPBP1	CIITA
KIF5A	TAF10
GYAR	SAT2
ABHD5	RTEL1
MRPS18A	RNF123
FUZ	MAPK3
EMSY	PLA2G3
FAM135B	PPOX
ARHGEF10L	PGGHG
CORO2B	ACBD4
STAMBPL1	TIGD5
SNCAIP	MAP2K7
PRXL2C	CNPY3
CALCOCO2	CLTCL1
CACNA2D1	PTPRU
EIF4G1	STAB1
CA3	DNTTIP1
PDXK	PHF1
EIF4A2	PHKG2
CLIP2	STK19
LZTR1	HDGF
STRN	MIA3
MAPRE2	ADAM15
NLGN3	GPT
PDK2	C8ORF33
TOX4	GSTA4
NELFCD	TADA2B
EIF2S3	NCAPH2
ATF6	RCE1
PTCH2	FXR1
GNAS	HOOK2
SLCO3A1	PRRC2A
YKT6	NOP56
SLC25A40	SHARPIN
ADGRB3	PUSL1
COPS8	AMBP
FLOT1	BNIP3
GABRA6	FAM20C
SLC22A5	PKN1
SPAG9	MAN2C1
CELF2	MRPL52
WNK2	PNP
TRAM1	KHNYN
TYW5	ITGB1BP1
LAMP5	NCOR2
SLC35F5	SLC26A2
HS3ST4	STEAP3
KCTD1	APOOL
PORCN	SPOPL
L1CAM	ATXN7
PAK3	SLMAP
COL23A1	CACUL1
DCAF8	CEP63
BMT2	ARPC1A
BET1	AGAP3
ALDH6A1	IP6K2
NAE1	TBCEL
ARL2	DHX9
WASF1	FAM20B
LRP1	FMO4
RBFOX3	MRPS24
B3GALT1	MPP6
GDI1	CCDC167
TARBP1	TMEM50B
MATN2	PRELID3A
PROCA1	VCAM1
QPCT	LUC7L
IDH3G	ARNT
SCAPER	DCTN1
EFL1	LUC7L2
ZNF606	CLN8
PIP4K2B	PTP4A2
UGDH	ANKRD11
TLK2	MISP
MED6	EMC10
PPP6R1	ATE1
WSCD1	MFSD11
NCSTN	NUDT7
PCNX1	ALG13
ADCY8	TMEM11
P4HTM	ZC3H18
MRPL48	SMPD4
GDPD5	JHY
CCDC93	MAVS
PSMG1	ZBBX
IQUB	GNAS
TBRG1	GPCPD1
UNC5D	RAB4A
MSH6	PTPN3
RIC1	PRPSAP2
HM13	NAA60
XIAP	RAB5C
GRIA3	IFT20
CDK20	FKBP7
VANGL2	CD74
TMEM132D	ZMYM5
MAP2	TMEM106C
MBNL1	FAM210A
AFF2	RAPGEF2
ARHGAP39	FASTKD5
OXR1	USP19
TUBA8	GPBP1
RGS7	RBM12
ABHD10	VPS25
ATP8A1	NBR1
TMEM67	EIF4A1
PDZD11	G3BP1
BCAS1	TTC19
EPHB3	MLLT10
USP15	SUPT20H
GPR89	CEP57L1
DENR	SUPT6H
BLOC1S6	LGALS9
DHDDS	ANKRD17
ST8SIA5	NMT2
RAPGEF5	BAP18
OPHN1	PSKH1
DTNA	MAP3K3
RHEB	GK5
PFDN1	LENG8
CACFD1	CACNB4
ELP1	NDST1
BSDC1	RALY
GLG1	TRMO
DSCAML1	CCM2
CHD6	G3BP2
APP	DPY19L4
RIPK1	FBXO31
DLGAP4	MGAT1
NOL4	R3HDM2
FAM135A	CCNT1
ZMIZ2	PPFIBP1
CP	PLEKHA5
FRRS1L	RIPOR1
DNAJC6	STOX1
ATF1	HMGXB4
CAMK2B	ATP11C
PRELID3B	TPM1
CYP46A1	RNH1
CYB5A	PICALM
TMEM255A	TRAPPC12
SIRT2	TM2D3
SNAP25	ZXDC
PAK5	BTF3L4
PPP1R7	TRMT1L
ANKS1B	GOLGA2
WAC	PITPNM2
NKAIN2	GAPVD1
TMEM39B	CARD19
ST6GALNAC6	PTBP3
PTPRA	CYP1A1
CLTC	HNRNPA3
FKBP1A	NMRK1
PSMF1	NFIB
ACOX1	SMAP1
UBE2Q2	NSD3
C18ORF25	ZSCAN29
RNF126	TEX30
MAPK10	RBM26
DIXDC1	PINX1
GRK4	SEC14L1
PTPRN2	RANBP3
FAM168B	ANKRD24
UBL3	PIP5K1C
ARFGAP1	DAZAP1
ABCC8	TMEM41B
EIF4A1	RPS24
OSER1	SORBS1
ZMIZ1	MPP2
SYS1	UBC
SLC35C2	SERPINA6
ELMO2	DDX24
PTGIS	TXNL4A
UBE2V2	CAMTA1
MSH3	MLH3
PLXNB1	PLEKHM1
FAT1	PEX19
ATP9A	RAI14
SAMD12	WTAP
AP3D1	SYNE1
CLVS1	KLHDC3
CDK5	KCMF1
ARHGAP5	BCLAF1
MED27	MRPS18B
CUTA	COLEC11
SUMO2	MBL1
USP5	USF3
GAS7	NONO
SORL1	SNRPC
SAXO2	CLK4
SLC8A2	ARHGAP45
ATP6V1C1	KAT2B
CPEB1	EPHA10
SEC11A	ASPG
SVOP	RPS25
MMS19	AKT2
MAPKAP1	LSM14A
SEPTIN9	SCARB1
AP3S2	ARRB2
RAB21	VPS39
RHOBTB2	NINL
SMARCA4	NAA20
PLXNC1	MAPK14
FBXO25	NDUFA3
PRPSAP1	MRPS14
NT5M	UGT1A6
SAMD4B	ALYREF
SS18L1	MTMR14
CMIP	THRAP3
JAKMIP2	NSD1
CAMTA2	STX8
COX10	FN1
TFG	RAB23
SH3GL2	PYDC3
TTC7B	IGF1
SUSD4	TYMP
OGDHL	AFDN
MICAL3	AGTRAP
EIF5A	RPL22
PLPPR1	CDC37L1
DLG4	IRF2
MLLT10	SNX6
UBE2G1	ENTPD4
PACC1	BRD8
ZNF180	NCOA4
GRIA1	OGA
DGCR2	DENND10
SEZ6	NIPSNAP2
PHF12
B4GALT6
FDPS
RTN4IP1
RAB18
TLE5
DKK3
NR1D2
HLF
CRHR1
SNX2
CACNA1G
PTK2
CHTOP
NXPE3
MIEN1
THRA
AIG1
BAP18
RETREG3
LCMT1
ZNF827
DNAJB14
RBBP7
CTIF
GNAI2
MAP3K12
LYNX1
SMAD5
PCYT1B
FBXO38
XPO4
TCN2
PPIL6
SEC24C
PPP1R9B
TMEM183A
DYRK4
LRFN5
GPR37L1
MPP5
UBE2T
WDR47
ERI3
UCHL5
SULF1
AHDC1
LENG8
CACNB4
COMMD2
SETD6
CDC42BPA
PLCB4
GSK3B
AKT3
FAM185A
GMDS
SLC4A10
EHBP1
MMTAG2
PHF20
MTDH
DOCK3
ZNF532
ZZEF1
TRAK1
CRAMP1
RNF13
OPLAH
PCMTD1
BOP1
SMARCD3
RBPJ
NEO1
HASPIN
SNX25
RALY
TMEM158
APBB2
QKI
KHDRBS3
ACTN2
ETV1
SNAPC1
DNPEP
EIF4B
RHBDD1
MFF
DNER
CPNE2
NCALD
MAP2K5
LRRFIP1
XPO6
TCEA1
HDAC4
GRIPAP1
AFAP1
TBC1D14
PEX5L
ACADVL
DRAP1
LARGE1
FOXP1
TBC1D1
CCM2
PCM1
GPR158
PAPSS1
SLC6A7
AK4
TUBB4A
HERC3
SCD5
HNRNPD
REEP2
WARS1
AGFG1
PHLDB1
EML3
KDM4A
SMIM14
GABRA2
SYVN1
PARD3
PSD
ARHGAP12
CNOT2
PIP4K2A
USP6NL
KIN
TASOR2
BCL2L13
SHTN1
METAP1D
FBXL16
BBS12
LIN7A
NAV3
SYT1
RAB31
OSBPL8
MDM2
MON2
GRM8
AJAP1
NT5C2
B4GALNT1
TFR2
R3HDM2
LRP12
PPP1R1A
CHCHD3
PRDM2
BBX
INPP4B
RPS6KA4
SLC39A9
DBX2
BEGAIN
PPFIBP1
KRAS
PCNX2
CMAS
GOLT1B
PI4KB
RIPOR1
EMG1
WASHC3
PPP6C
PRKCZ
LGALS1
EIF3L
KIRREL3
ZC3H7B
PRSS16
GRAMD4
SLC6A9
TPP1
DENND6B
MEAF6
PPP1R8
UBR3
SHANK3
GATD1
MRPL23
KMT5B
ST3GAL3
SLC25A39
TMEM25
DOC2G
DPP3
SNX15
CNEP1R1
NUDT22
RTN3
TUSC3
DCTN3
FADS2
FADS1
SHF
ETHE1
COQ6
TP53I11
EXT2
TPM2
PRR5L
PAMR1
ANO5
PCLO
CADM1
ARNTL
EPS8
TUB
ALDH4A1
APBB1
CLPB
GPD2
PICALM
HIKESHI
CTNND2
MTMR2
CEP126
CEP164
HYOU1
ABCG4
NLRX1
DDHD1
ARHGEF12
EXOC2
WRNIP1
HNRNPM
GABBR2
GMPR
MTX3
TM2D3
FNBP1L
VRK3
ADGRL2
NCOA1
LRRC7
PATJ
TM2D1
DAB1
YIPF1
ELAVL4
BEND5
RAP1GAP2
PRRC2A
MDGA2
FOXJ3
RIMS3
MTA3
ZMPSTE24
ZDHHC9
THAP3
NCDN
SRC
SRGAP2
KDM1A
MAP2K4
RAP1GAP
SH2D5
TMEM14C
IGSF21
FHAD1
PLOD1
MAD2L2
PEX14
ZNF280D
SLC1A2
MLF2
NPDC1
SPPL2B
PFKL
TMEM141
GTF3C4
CAMK4
FUBP3
TOR1B
PTPA
SH3GLB2
TRUB2
GOLGA2
MVB12B
PBX3
GARNL3
SAE1
SH3BP5
DENND1A
RBM18
C9ORF43
PTCD2
AKAP2
OGT
MIB2
PRDX5
NDUFB6
GRIA2
GLMN
STK25
ADPGK
ERMP1
PTPRD
NFIB
CYRIB
ZNF782
IARS1
SPARCL1
FRMPD3
CCNI
KATNAL1
RWDD1
TRPC4
ZC3H13
CAB39L
TRAPPC11
PLEKHA6
TRMT9B
PPP2CB
TIMP4
RHOT2
ARHGEF7
PCNX4
UBAC2
RBM26
MYCBP2
LMO7
ANO4
NDST4
MYO3A
APC2
PSMB7
HSPA4L
SAFB2
UBE2W
ELP3
CCDC25
MSRA
TMEM62
TRIM9
SPOCK3
PRKCSH
SCG5
QTRT1
PIGT
SORBS3
FAM160B2
ATP6V1B2
SORBS2
DHPS
BRD4
COPE
NCAN
LRRC8B
CRTC1
AP3S1
RASGRF2
MED23
HNRNPLL
CELF5
NFIC
MICU3
ZNF142
DAZAP1
OARD1
RASGEF1A
RASSF4
RPP30
GRID1
TMEM63B
STN1
SAMD8
USP54
MCTP1
HK1
DNAJC12
PPP2R1B
RNLS
RALGAPB
POLR2F
NECAB1
SORBS1
NRXN3
BTRC
MPP2
OGA
PAPOLA
TCF7L2
UNC79
ABLIM1
TEX264
GRK5
ZRANB1
TCERG1L
RIC8B
TMEM121
ADARB1
SYT5
CALB2
MARK3
PPP4R4
IFI27
CASP3
TXNL4A
RNF181
SPATA7
KCNK10
TMEM63C
ANKHD1
CTBP2
NUMB
ATP6V1D
EPC2
NIN
CBX7
PPIB
GTF2A2
C16ORF70
LANCL2
NEDD4
NEDD4L
TTBK2
ZNF106
OSBPL11
HNRNPC
DDHD2
ANKRD13C
CPNE6
SLC22A17
CBS
RALGAPA1
PTPN9
PEAK1
NIPSNAP2
SUMF2
CRCP
GALNT17
EML5
KIDINS220
CUX1
DLG1
ANKRD6
SLC12A2
CEP120
FNTA
MRPS5
PSMB1
EDIL3
SSBP2
TMEM108
SCAMP1
ERBIN
MEGF10
DROSHA
CDH9
ANKH
ADCY2
MED10
TAF1C
PACSIN1
TIAM2
PIH1D1
ZUP1
FYN
FAXC
WIZ
ABI1
ORC3
PHF6
SLC35A1
PGM3
RTN1
BEND6
SH2D6
CRELD1
SPATA9
ILRUN
RPS10
RPS18
AMFR
CASTOR2
DAPK1
ITGB8
MAP4K3
RTN4
IMMT
UBE2Z
FMNL2
NDFIP1
IQSEC1
CDIP1
HNRNPH1
SLC4A7
ODR4
RABL2A
SNTB2
HSDL1
KARS1
PTMS
DUS2
CCDC88A
SERINC1
NRGN
MKRN1
STIM1
SUPT5H
TMEM229B
OBSL1
DTX1
TTR
SYT7
SLC38A7
MAPK8IP2
ITIH3
ADGRL1
CHTF8
ZNF548
MAPK11
TPM3
FAM193B
MTMR1
AMDHD2
SPCS1
FAM107A
PPP1R12A
DTYMK
WDR59
MYO18A
NCAM1
ARPP21
CTNNA2
OPRL1
ADORA1
UBB
GRAMD1B
RNF146
MSL1
PIGU
VEGFB
MAPK15
DLGAP1
PCBP4
ZNF165
SMAP
GMPPA
SLC4A3
GSTA4
KCNT1
SGIP1
TBC1D4
CHN1
XPOT
EPB41L2
SPRYD3
FNBP1
RBFOX2
ATP11C
SBF1
PPFIBP2
ALKBH6
CHD3
DOCK6
PKIG
ADGRB2
PUS7L
PTGDS
UROD
DPAGT1
PAN3
WASF3
TPT1
XRCC1
AIP
DCAF15
MAN2C1
CHST1
RANBP3
PIP5K1C
GSTM1
CKB
TAP2
SNX3
PKM
IQSEC3
GLRA2
ANKRD23
FOXN2
CCDC85A
CLK1
ERCC3
SRSF2
ATXN7
PRRT3
RAB40C
SLC39A10
SFSWAP
GNB1L
ANKRD44
DUSP23
FRMD5
PLPPR3
ST8SIA3
PDE6B
DPM2
TCF20
SALL1
TSEN34
MISP
ZNF639
ZFAND2B
ST3GAL1
SPAG16
EXOC6B
C7ORF26
SYNM
MCF2L
SUGP2
PABPN1
ELFN2
NTHL1
ATP10A
LOXL1
FAM53A
SLCO1A2
NEK8
C7ORF57
PLK5
C17ORF113
POGLUT1
KCNB1
JUP
ANKMY1
ZNHIT3
POLR1F
LCN6
HES4
TMEM80
ZNF593
GRIN3B
HGH1
TRIP12
FNBP4
TRIM13
NFXL1
ARHGAP21
ZNF2
SEPTIN3
ABCC5
CBLN2
NXF1
DMAP1
MAP1S
TRIM68
GRM5
SIK3
SSR1
RBM24
COQ8B
PBX1
ACAP3
USP20
CIZ1
TTC16
DNAJB5
INTS10
TTC14
TSC22D1
NFIX
OCEL1
KLHL28
FAM13C
PKD2L1
LDB1
TEX22
FRMD6
MEIS2
UVSSA
PRPF39
NOC2L
KCNN2
NREP
LYRM7
C2ORF49
PRICKLE4
BCL2L11
RNF112
HTRA2
GGCX
CACNA1B
SAT2
ZNF575
RNF123
NPRL2
MACROD1
TMEM120B
B4GALNT4
CHD2
LRRC45
MPZL1
PPOX
JAKMIP3
CNBP
DDX49
SMG6
SHROOM1
ZNF335
ITPA
ELAPOR1
C20ORF194
ITGA2B
TIGD5
TMEM208
FDXR
JMJD1C
MAG
COL7A1
MAP2K7
HNRNPH3
AOC2
ITPR1
PPP1R12C
ACD
ADCK5
SPSB3
ZRSR2
RPL22L1
PHF1
SPTBN4
C2CD2L
EPHB6
ZNF276
MED12
RTN2
RAB26
NKPD1
DGAT1
TARS2
TCEAL9
UNC5A
HDAC3
JOSD1
COMMD5
GTF2H3
EDC4
ANKRD13B
HYAL1
IMPDH2
ATR
TIE1
UFD1
UBTF
FOXRED1
CHRND
SLC25A10
ANKRD52
DISP2
PRPF40B
BCAT1
NCAPH2
CHKB
SSH3
POLRMT
ARFIP2
TALDO1
KLHL11
LPCAT4
CENATAC
FAAH
TESK2
NOP56
DCDC2B
EXOC7
SHARPIN
NELFB
PAXX
MEIS3
AOPEP
TSC22D4
ANKRD10
CEP295
SLC44A2
HEPACAM
KCNN1
MICU1
STK32C
IRAK1
TRRAP
RAB15
MRPL52
TXLNA
PLOD3
CDAN1
STXBP5
PUM2
SLC5A6
CRIM1
PCYOX1
MRPL35
MAP4K4
EVI5
NIT2
SENP7
CYTH3
OPA1
PUF60
AP2M1
ZNF655
NDUFV3
HTR4
KLHL3
ARMC8
CFAP100
ARPC1A
GSG1L
DMWD
UBN1
ADGRF5
RASGEF1C
RBBP6
PLCB1
RNASEH2B
ATXN2
MXRA7
SUN1
SLIT2
ZFYVE16
LRRC74B
CDR2
CAMK1G
SPIN1
DHX9
TMEM8B
SDCCAG8
PRPF18
ZNF664
SGCE
FAM189A1
SS18
GMFG
PIAS2
WDR17
PKIA
SLC19A1
MINDY3
TDP2
OSBPL6
RTCA
KCNA3
FCGR1A
RMDN1
RBMS3
TANC2
CPEB3
BAG6
RBSN
FGFR2
ZSWIM3
MFSD6
NDUFAF4
PDP1
COPS7B
MPHOSPH6
LRRFIP2
FCHO1
VPS13A
PDE1C
SYT16
ATXN7L2
MAST4
REEP6
ARMCX5
ATXN1L
TMEM94
FLNB
PHKB
PTPN13
LRRC56
COMMD7
STAG2
TMEM59
PTCH1
CCDC184
MLX
NLE1
DYRK1A
FASN
MAPT
MYH10
UNC13A
SFI1
ATRX
HNRNPAB
SLC37A1
RIMS2
RUSF1
NFASC
ZNF283
MED14
MYH14
C1ORF198
NALCN
GRM7
KCND3
RAB5C
ADNP
TCTN1
RUNX2
KIFC3
DNAJC7
GTF2E1
UBE2H
FKBP7
WASHC5
PPP1R3D
WDTC1
ZBTB49
RBM10
ANXA6
CTU1
NAP1L4
UST
CAPRIN2
ZNF566
PPFIA3
ARHGAP26
EIF4H
SEMA6D
CA9
FAIM
PHF14
EOLA1
ADAP1
NTRK3
PHF21B
ICAM5
TMEM17
EPHX1
SHISA6
TMBIM1
FBXW11
TNKS2
PPP6R3
INF2
HNRNPK
DZIP3
CCP110
SORD
GM525
RBM39
SLC10A5
MLLT6
ERC2
CCDC82
ISM2
CERS4
BPTF
NAT9
ATP2B4
ICE2
ATP1B3
SCUBE1
ARIH1
SPTSSB
RAP1GDS1
CDK19
MBP
PLEC
TDRKH
TP53BP1
FLAD1
GRIK4
[truncated: 232 more rows]
