# Supplementary material for: Sex differences in gene expression and alternative splicing in the Chinese horseshoe bat
Source: PeerJ. 2023 Apr 24;11:e15231. doi: 10.7717/peerj.15231 (PMC10135408; doi:10.7717/peerj.15231)
Supplement: Table S8 — Significant terms and pathways with the q-value of 0.05 were shown in bold. Highlighted terms are those representatives after removing the redundancy. Log (q-value) of −1.3 is equal to q-value of 0.05. Terms and pathways with uncorrected p < 0.01 were also shown. Log (p-value) of −2.2 is equal to p-value of 0.01. [file peerj-11-15231-s008.xlsx]

## Sheet: brain_DSGs_2231
Category	GO	Description	LogP	Hits	Log(q-value)
GO Biological Processes	GO:0050804	modulation of chemical synaptic transmission	-12	ACHE|ADCY8|ADORA1|APBA1|APP|ARRB2|CACNA1B|CALB2|CAMK2A|CAMK2B|CDK5|DBN1|DLG4|DNM1|DVL1|ELAVL4|EPHB1|FMR1|FYN|GABBR1|GLUL|GNAI2|GRIA1|GRID1|GRIK1|GRIK4|GRIK5|GRIN1|GRIN2A|GRM1|GRM4|GRM5|GRM7|GRM8|GSK3B|KCNB1|KRAS|MAP1A|MAPT|MPP2|NFATC4|NRGN|NTRK2|OPHN1|SEPTIN5|PPP3CB|PRKAR1B|PRKCB|PRKCG|PRKCZ|PTPRA|PTPRD|RASGRF2|CX3CL1|SLC6A6|SLC8A2|SLC8A3|SLC12A2|SNAP25|SNCA|SRC|STX3|STXBP1|SYT1|CNTN2|PPFIA3|CASK…	-8.3
GO Biological Processes	GO:0099177	regulation of trans-synaptic signaling	-12	ACHE|ADCY8|ADORA1|APBA1|APP|ARRB2|CACNA1B|CALB2|CAMK2A|CAMK2B|CDK5|DBN1|DLG4|DNM1|DVL1|ELAVL4|EPHB1|FMR1|FYN|GABBR1|GLUL|GNAI2|GRIA1|GRID1|GRIK1|GRIK4|GRIK5|GRIN1|GRIN2A|GRM1|GRM4|GRM5|GRM7|GRM8|GSK3B|KCNB1|KRAS|MAP1A|MAPT|MPP2|NFATC4|NRGN|NTRK2|OPHN1|SEPTIN5|PPP3CB|PRKAR1B|PRKCB|PRKCG|PRKCZ|PTPRA|PTPRD|RASGRF2|CX3CL1|SLC6A6|SLC8A2|SLC8A3|SLC12A2|SNAP25|SNCA|SRC|STX3|STXBP1|SYT1|CNTN2|PPFIA3|CASK…	-8.3
GO Biological Processes	GO:0050890	cognition	-7.7	ADCY8|ADORA1|AMFR|APP|ADGRB3|CAMK4|CASP3|CDK5|BRINP1|DLG4|ELAVL4|AFF2|FYN|GRIA1|GRIN1|GRIN2A|GRM5|KRAS|MAP1A|MAPT|MEIS2|NFATC4|NRGN|NTRK2|OPRL1|PAFAH1B1|PPP3CB|PRKAR1B|PRKCG|PRKCZ|SCN2A|SGK1|ST3GAL4|SLC8A2|SLC8A3|SNAP25|ABCC8|CNTN2|THRA|TUSC3|PICALM|SYNJ1|NRXN3|NRXN1|NRXN2|PJA2|DGCR2|ABCA7|ATP8A1|ARL6IP5|CHL1|EHMT2|FAM107A|KLK8|CPEB3|CIC|PLCB1|DDHD2|CRTC1|NCSTN|ADNP|MAPK8IP2|SLC24A2|ZNF385A|SHANK…	-4.6
GO Biological Processes	GO:0048167	regulation of synaptic plasticity	-7.7	ADCY8|ADORA1|APP|CALB2|CAMK2A|CAMK2B|CDK5|DBN1|DLG4|FMR1|GRIA1|GRIN1|GRIN2A|GRM5|GSK3B|KCNB1|KRAS|MAP1A|MAPT|MPP2|NFATC4|NRGN|NTRK2|PPP3CB|PRKAR1B|PRKCG|PRKCZ|RASGRF2|CX3CL1|SLC8A2|SLC8A3|SNAP25|SNCA|STX3|STXBP1|CNTN2|PPFIA3|SYT7|RIMS2|RIMS3|CYP46A1|FAM107A|LZTS1|CPEB3|RIMS1|ZZEF1|NCDN|CRTC1|NCSTN|SLC24A2|NSMF|ERC2|SLC4A10|MCTP1|SHANK3|SHISA6|SHISA7	-4.6
GO Biological Processes	GO:0043484	regulation of RNA splicing	-7.5	CLK1|CLK2|DYRK1A|FMR1|AFF2|HNRNPA1|HNRNPA2B1|HNRNPH1|HNRNPH3|HNRNPK|MBNL1|ATXN7|SRSF2|SRSF5|SFSWAP|SNRNP70|SRPK2|TAF9|RBM10|TRRAP|KAT2B|QKI|RBM39|WTAP|SUPT7L|PQBP1|RBM12|MBNL2|DDX17|KHDRBS3|CELF1|CELF2|SRSF10|RNPS1|FASTK|PUF60|RBFOX2|DAZAP1|TRA2A|RBM11|RBFOX1|SUPT20H|CELF4|CCNL1|PCBP4|CLK4|PTBP2|CELF5|RBM15|CCNL2|HNRNPLL|RBFOX3|RBM24|ILDR2	-4.3
GO Biological Processes	GO:0007611	learning or memory	-7.3	ADCY8|AMFR|APP|ADGRB3|CAMK4|CASP3|CDK5|BRINP1|DLG4|ELAVL4|AFF2|FYN|GRIA1|GRIN1|GRIN2A|GRM5|KRAS|MAP1A|MAPT|MEIS2|NFATC4|NRGN|NTRK2|OPRL1|PAFAH1B1|PPP3CB|PRKAR1B|PRKCG|PRKCZ|SCN2A|SGK1|SLC8A2|SLC8A3|SNAP25|ABCC8|CNTN2|THRA|PICALM|SYNJ1|NRXN3|NRXN1|NRXN2|PJA2|ABCA7|ATP8A1|ARL6IP5|EHMT2|KLK8|CPEB3|CIC|PLCB1|DDHD2|CRTC1|NCSTN|ADNP|MAPK8IP2|SLC24A2|ZNF385A|SHANK1|KCNK10|NLGN3|PAK5|NDRG4|BHLHB9|PPP1R1B…	-4.2
GO Biological Processes	GO:0034330	cell junction organization	-7.2	ACHE|ACTN2|ANK2|ANK3|APBB2|APC|APP|RHOA|ARL2|ARVCF|ADGRB3|CACNB4|CDH9|CDH10|CDK5|CTBP2|CTNND2|CXADR|DBN1|DCTN1|DLG1|DLG4|DRP2|DVL1|EPHB1|EPHB3|FNTA|FYN|GABRA2|GABRG2|GPM6A|GRM5|JUP|KIFC3|L1CAM|MAPT|AFDN|NEDD4|NRCAM|OPHN1|PAK3|PLEC|PLXNB1|PTPRD|PTPRK|PTPRS|CX3CL1|SLC8A2|SLC8A3|SNCA|SRC|STRN|CNTN2|PIP5K1A|SPARCL1|PPFIBP2|PPFIBP1|PPFIA4|PPFIA1|PKP4|PPFIA3|NUMB|ARHGEF7|MTMR2|WASF1|DNAJA3|DLG5|NRXN1|N…	-4.1
GO Biological Processes	GO:0050684	regulation of mRNA processing	-7.1	CCNT1|DHX9|DYRK1A|FMR1|HNRNPA1|HNRNPA2B1|HNRNPK|MBNL1|SRSF2|SFSWAP|SNRNP70|SRPK2|SUPT5H|SUPT6H|RBM10|QKI|RBM39|WTAP|SAFB2|MBNL2|DDX17|KHDRBS3|CELF1|CELF2|SRSF10|PAPOLA|RNPS1|CPSF6|PUF60|CPEB3|RBFOX2|DAZAP1|TRA2A|RBM11|RBFOX1|CELF4|PCBP4|CELF5|CPEB1|RBM15|PTCD2|SLTM|RBFOX3|RBM24	-4.1
GO Biological Processes	GO:0050808	synapse organization	-7.1	ACHE|ANK3|APBB2|APP|ADGRB3|CACNB4|CDK5|CTBP2|CTNND2|DBN1|DCTN1|DLG1|DLG4|DRP2|DVL1|EPHB1|EPHB3|FNTA|FYN|GABRA2|GABRG2|GPM6A|GRM5|L1CAM|MAPT|NEDD4|NRCAM|OPHN1|PAK3|PLXNB1|PTPRD|PTPRS|CX3CL1|SLC8A2|SLC8A3|SNCA|CNTN2|SPARCL1|PPFIBP2|PPFIBP1|PPFIA4|PPFIA1|PPFIA3|MTMR2|WASF1|DNAJA3|NRXN1|NRXN2|UNC13B|WASF3|KLK8|NTNG1|PDZRN3|UNC13A|NFASC|ADGRL3|OBSL1|SRGAP2|ERC2|PCLO|SHANK1|SDF4|NLGN3|PCDHGC4|ALS2|TMEM…	-4.1
GO Biological Processes	GO:0099536	synaptic signaling	-7	ACHE|ADARB1|ADORA1|AMPH|APBA1|ARRB2|DAGLA|CACNA1B|CACNB4|CDK5|CHRND|CTBP2|DAG1|DLG1|DLG2|DLG4|DRP2|DTNA|DVL1|GABBR1|GABRA2|GABRA3|GABRA6|GABRG2|GLRA2|GNAI2|GNB1|GRIA1|GRIA2|GRID1|GRIK1|GRIK4|GRIK5|GRIN1|GRIN2A|GRM1|GRM4|GRM5|GRM7|GSK3B|HTR4|KCNN1|KIF5A|LY6E|LY6H|MBP|MPP2|NTRK2|PAFAH1B1|PLP1|SEPTIN5|PRKCG|PTPRD|PTPRN2|SLC1A2|SNAP25|SNCA|STX3|STXBP1|SYT1|SYT5|TAC1|PPFIA3|CADPS|LIN7A|SYNJ1|CACNA1G|S…	-4
GO Biological Processes	GO:0007215	glutamate receptor signaling pathway	-7	APP|DAGLA|FMR1|GRIA1|GRIA2|GRIA3|GRID1|GRIK1|GRIK4|GRIK5|GRIN1|GRIN2A|GRM1|GRM4|GRM5|GRM7|GRM8|KCNB1|PLP1|PLCB1|NCSTN|GRIN3B	-4
GO Biological Processes	GO:0099643	signal release from synapse	-6.7	CDK5|CTBP2|DVL1|GRM4|SEPTIN5|PTPRN2|SNAP25|SNCA|STX3|STXBP1|SYT1|SYT5|PPFIA3|CADPS|LIN7A|SYNJ1|SYT7|NRXN1|NRXN2|RIMS2|RIMS3|UNC13B|RPH3A|RIMS1|UNC13A|PIP5K1C|ERC2|BLOC1S6|PCLO|PDZD11	-3.8
GO Biological Processes	GO:0007269	neurotransmitter secretion	-6.7	CDK5|CTBP2|DVL1|GRM4|SEPTIN5|PTPRN2|SNAP25|SNCA|STX3|STXBP1|SYT1|SYT5|PPFIA3|CADPS|LIN7A|SYNJ1|SYT7|NRXN1|NRXN2|RIMS2|RIMS3|UNC13B|RPH3A|RIMS1|UNC13A|PIP5K1C|ERC2|BLOC1S6|PCLO|PDZD11	-3.8
GO Biological Processes	GO:0099504	synaptic vesicle cycle	-6.6	AMPH|BIN1|CANX|CDK5|AP2M1|AP3S1|CTBP2|DNM1|OPHN1|PLD2|SEPTIN5|ITSN1|SH3GL2|SNAP25|SNCA|STX3|STXBP1|SYT1|SYT5|PICALM|PPFIA3|CADPS|SYNJ1|AP3D1|SYT7|RIMS2|RIMS3|DNAJC6|SNAP91|AP3S2|UNC13B|RIMS1|UNC13A|PIP5K1C|ERC2|BLOC1S6|PCLO|PACSIN1|NLGN3|SLC17A7	-3.8
GO Biological Processes	GO:0032990	cell part morphogenesis	-6.6	ADARB1|ANK3|APBB1|APLP1|APP|RHOA|RERE|DDR1|CDK5|CHN1|CTNNA2|CTNND2|DAG1|DBN1|DLG4|DVL1|ELAVL4|EPHA5|EPHB1|EPHB3|EPHB6|ETV1|FGFR2|FYN|GPM6A|KIF5A|L1CAM|MAP1A|MAP2|NCAM1|NEO1|NFIB|NRCAM|NR4A2|OPHN1|PAFAH1B1|PAK3|PLEC|PLXNB1|PPP3CB|PRKCZ|PTCH1|PTK2|ROCK1|SGK1|SH3GL2|SNX2|SPAST|STK11|STXBP1|CNTN2|TOP2B|UBB|VEGFA|PICALM|GAS7|NUMB|IQGAP1|WASF1|B4GALT6|SLIT2|NRXN3|NRXN1|MAP4K4|FEZ1|PLPPR4|ABI1|DNM1L|PLX…	-3.7
GO Biological Processes	GO:0099537	trans-synaptic signaling	-6.4	ACHE|ADARB1|ADORA1|AMPH|APBA1|ARRB2|DAGLA|CACNA1B|CACNB4|CDK5|CHRND|CTBP2|DAG1|DLG1|DLG2|DLG4|DTNA|DVL1|GABBR1|GABRA2|GABRA3|GABRA6|GABRG2|GLRA2|GRIA1|GRIA2|GRID1|GRIK1|GRIK4|GRIK5|GRIN1|GRIN2A|GRM1|GRM4|GRM5|GRM7|GSK3B|HTR4|KCNN1|KIF5A|MBP|MPP2|NTRK2|PAFAH1B1|PLP1|SEPTIN5|PRKCG|PTPRD|PTPRN2|SLC1A2|SNAP25|SNCA|STX3|STXBP1|SYT1|SYT5|TAC1|PPFIA3|CADPS|LIN7A|SYNJ1|CACNA1G|SYT7|DLGAP1|NRXN1|NRXN2|GAB…	-3.6
GO Biological Processes	GO:0120039	plasma membrane bounded cell projection morphogenesis	-6.3	ADARB1|ANK3|APBB1|APLP1|APP|RHOA|RERE|DDR1|CDK5|CHN1|CTNNA2|CTNND2|DAG1|DBN1|DLG4|DVL1|ELAVL4|EPHA5|EPHB1|EPHB3|EPHB6|ETV1|FGFR2|FYN|GPM6A|KIF5A|L1CAM|MAP1A|MAP2|NCAM1|NEO1|NFIB|NRCAM|NR4A2|OPHN1|PAFAH1B1|PAK3|PLXNB1|PPP3CB|PRKCZ|PTCH1|PTK2|ROCK1|SGK1|SH3GL2|SNX2|SPAST|STK11|STXBP1|CNTN2|TOP2B|UBB|VEGFA|PICALM|GAS7|NUMB|IQGAP1|WASF1|B4GALT6|SLIT2|NRXN3|NRXN1|MAP4K4|FEZ1|PLPPR4|ABI1|PLXNC1|FLOT1|C…	-3.5
GO Biological Processes	GO:0048812	neuron projection morphogenesis	-6.2	ADARB1|ANK3|APBB1|APLP1|APP|RHOA|RERE|DDR1|CDK5|CHN1|CTNNA2|CTNND2|DAG1|DBN1|DLG4|DVL1|ELAVL4|EPHA5|EPHB1|EPHB3|EPHB6|ETV1|FGFR2|FYN|GPM6A|KIF5A|L1CAM|MAP1A|MAP2|NCAM1|NEO1|NFIB|NRCAM|NR4A2|OPHN1|PAFAH1B1|PAK3|PLXNB1|PPP3CB|PRKCZ|PTCH1|PTK2|ROCK1|SGK1|SH3GL2|SPAST|STK11|STXBP1|CNTN2|TOP2B|UBB|VEGFA|PICALM|GAS7|NUMB|IQGAP1|WASF1|B4GALT6|SLIT2|NRXN3|NRXN1|MAP4K4|FEZ1|PLPPR4|ABI1|PLXNC1|FLOT1|CHL1|N…	-3.5
GO Biological Processes	GO:0098916	anterograde trans-synaptic signaling	-6.2	ACHE|ADARB1|ADORA1|AMPH|APBA1|ARRB2|CACNA1B|CACNB4|CDK5|CHRND|CTBP2|DLG1|DLG2|DLG4|DTNA|DVL1|GABBR1|GABRA2|GABRA3|GABRA6|GABRG2|GLRA2|GRIA1|GRIA2|GRID1|GRIK1|GRIK4|GRIK5|GRIN1|GRIN2A|GRM1|GRM4|GRM5|GRM7|GSK3B|HTR4|KCNN1|KIF5A|MBP|MPP2|PAFAH1B1|PLP1|SEPTIN5|PRKCG|PTPRN2|SLC1A2|SNAP25|SNCA|STX3|STXBP1|SYT1|SYT5|TAC1|PPFIA3|CADPS|LIN7A|SYNJ1|CACNA1G|SYT7|DLGAP1|NRXN1|NRXN2|GABBR2|RIMS2|RIMS3|SV2B|AK…	-3.4
GO Biological Processes	GO:0007268	chemical synaptic transmission	-6.2	ACHE|ADARB1|ADORA1|AMPH|APBA1|ARRB2|CACNA1B|CACNB4|CDK5|CHRND|CTBP2|DLG1|DLG2|DLG4|DTNA|DVL1|GABBR1|GABRA2|GABRA3|GABRA6|GABRG2|GLRA2|GRIA1|GRIA2|GRID1|GRIK1|GRIK4|GRIK5|GRIN1|GRIN2A|GRM1|GRM4|GRM5|GRM7|GSK3B|HTR4|KCNN1|KIF5A|MBP|MPP2|PAFAH1B1|PLP1|SEPTIN5|PRKCG|PTPRN2|SLC1A2|SNAP25|SNCA|STX3|STXBP1|SYT1|SYT5|TAC1|PPFIA3|CADPS|LIN7A|SYNJ1|CACNA1G|SYT7|DLGAP1|NRXN1|NRXN2|GABBR2|RIMS2|RIMS3|SV2B|AK…	-3.4
GO Biological Processes	GO:0048858	cell projection morphogenesis	-6.1	ADARB1|ANK3|APBB1|APLP1|APP|RHOA|RERE|DDR1|CDK5|CHN1|CTNNA2|CTNND2|DAG1|DBN1|DLG4|DVL1|ELAVL4|EPHA5|EPHB1|EPHB3|EPHB6|ETV1|FGFR2|FYN|GPM6A|KIF5A|L1CAM|MAP1A|MAP2|NCAM1|NEO1|NFIB|NRCAM|NR4A2|OPHN1|PAFAH1B1|PAK3|PLXNB1|PPP3CB|PRKCZ|PTCH1|PTK2|ROCK1|SGK1|SH3GL2|SNX2|SPAST|STK11|STXBP1|CNTN2|TOP2B|UBB|VEGFA|PICALM|GAS7|NUMB|IQGAP1|WASF1|B4GALT6|SLIT2|NRXN3|NRXN1|MAP4K4|FEZ1|PLPPR4|ABI1|PLXNC1|FLOT1|C…	-3.4
GO Biological Processes	GO:0099003	vesicle-mediated transport in synapse	-6.1	AMPH|BIN1|CANX|CDK5|AP2M1|AP3S1|CTBP2|DNM1|OPHN1|PLD2|SEPTIN5|ITSN1|SH3GL2|SNAP25|SNCA|STX3|STXBP1|SYT1|SYT5|PICALM|PPFIA3|CADPS|SYNJ1|AP3D1|SYT7|RIMS2|RIMS3|DNAJC6|SNAP91|AP3S2|UNC13B|RIMS1|UNC13A|PIP5K1C|ERC2|BLOC1S6|PCLO|PACSIN1|CALY|NLGN3|SLC17A7	-3.3
GO Biological Processes	GO:0048024	regulation of mRNA splicing, via spliceosome	-5.6	DYRK1A|FMR1|HNRNPA1|HNRNPA2B1|HNRNPK|MBNL1|SRSF2|SFSWAP|SNRNP70|SRPK2|RBM10|QKI|RBM39|WTAP|MBNL2|DDX17|KHDRBS3|CELF1|CELF2|SRSF10|RNPS1|PUF60|RBFOX2|DAZAP1|TRA2A|RBM11|RBFOX1|CELF4|PCBP4|CELF5|RBM15|RBFOX3|RBM24	-2.9
GO Biological Processes	GO:0036465	synaptic vesicle recycling	-5.6	AMPH|BIN1|CANX|CDK5|AP2M1|AP3S1|DNM1|OPHN1|PLD2|ITSN1|SH3GL2|SNCA|SYT1|SYT5|PICALM|SYNJ1|AP3D1|SYT7|DNAJC6|SNAP91|AP3S2|PIP5K1C|PACSIN1|NLGN3	-2.9
GO Biological Processes	GO:0048488	synaptic vesicle endocytosis	-5.5	AMPH|BIN1|CANX|CDK5|AP2M1|AP3S1|DNM1|OPHN1|ITSN1|SH3GL2|SNCA|SYT1|SYT5|PICALM|SYNJ1|AP3D1|DNAJC6|SNAP91|AP3S2|PIP5K1C|PACSIN1|NLGN3	-2.9
GO Biological Processes	GO:0140238	presynaptic endocytosis	-5.5	AMPH|BIN1|CANX|CDK5|AP2M1|AP3S1|DNM1|OPHN1|ITSN1|SH3GL2|SNCA|SYT1|SYT5|PICALM|SYNJ1|AP3D1|DNAJC6|SNAP91|AP3S2|PIP5K1C|PACSIN1|NLGN3	-2.9
GO Biological Processes	GO:0016079	synaptic vesicle exocytosis	-5.4	CDK5|CTBP2|SEPTIN5|SNAP25|SNCA|STX3|STXBP1|SYT1|SYT5|PPFIA3|CADPS|SYNJ1|SYT7|RIMS2|RIMS3|UNC13B|RIMS1|UNC13A|PIP5K1C|ERC2|BLOC1S6|PCLO	-2.7
GO Biological Processes	GO:0042391	regulation of membrane potential	-5.3	ACTN2|ADORA1|AKT2|BIN1|ANK2|ANK3|APP|ARRB2|ATP1B3|BAK1|CACNA2D1|CAMK2D|CDK5|CHRND|CXADR|DLG1|DLG4|DMD|DVL1|FHL1|FMR1|GABBR1|GABRA2|GABRA3|GABRA6|GABRG2|GLRA2|GRIA1|GRIA3|GRID1|GRIK1|GRIK4|GRIK5|GRIN1|GRIN2A|GRM1|GRM5|GSK3B|JUP|KCNB1|KCND3|KCNMA1|KCNN2|MAPT|MPP2|NEDD4|NRCAM|NTRK2|PRKAR1B|PRKCZ|SCN1A|SCN2A|SLC4A3|SLC8A2|SLC8A3|SNCA|SRC|UBB|VCP|SLMAP|SLC4A4|MTMR2|CACNA1G|NRXN1|RIMS2|RIMS3|AKAP9|ZMPS…	-2.7
GO Biological Processes	GO:0007612	learning	-5.1	APP|ADGRB3|CDK5|DLG4|ELAVL4|FYN|GRIN1|GRIN2A|GRM5|KRAS|MAP1A|MEIS2|NRGN|NTRK2|OPRL1|PPP3CB|SLC8A2|SLC8A3|SNAP25|ABCC8|CNTN2|SYNJ1|NRXN3|NRXN1|NRXN2|ABCA7|ATP8A1|CIC|PLCB1|DDHD2|MAPK8IP2|SLC24A2|SHANK1|NLGN3|PAK5|NDRG4|PPP1R1B|PPP1R9B|ATAD1|SHANK3|IFT20|ATXN1L	-2.5
GO Biological Processes	GO:0098815	modulation of excitatory postsynaptic potential	-5.1	APP|DLG4|DVL1|GRIN1|GRIN2A|PRKAR1B|PRKCZ|SLC8A2|SLC8A3|MTMR2|NRXN1|RIMS2|RIMS1|SHANK1|NLGN3|CELF4|TMEM108|TMEM25|SHANK3	-2.5
GO Biological Processes	GO:1902992	negative regulation of amyloid precursor protein catabolic process	-5	BIN1|CLU|FLOT2|NTRK2|ROCK1|RTN1|RTN2|SORL1|PICALM|RTN3|ABCA7|RTN4	-2.4
GO Biological Processes	GO:0006836	neurotransmitter transport	-5	CDK5|CTBP2|DVL1|GABRA2|GRM4|SEPTIN5|PTPRN2|SLC1A2|SLC6A6|SLC6A7|SLC6A9|SNAP25|SNCA|STX3|STXBP1|SYT1|SYT5|PPFIA3|CADPS|LIN7A|SYNJ1|SYT7|NRXN1|NRXN2|RIMS2|RIMS3|SV2B|UNC13B|PARK7|RPH3A|RIMS1|UNC13A|PIP5K1C|ERC2|BLOC1S6|PCLO|PDZD11|SLC17A7	-2.4
GO Biological Processes	GO:1903311	regulation of mRNA metabolic process	-4.8	CCNT1|DHX9|DYRK1A|ELAVL4|FMR1|HNRNPA1|HNRNPA2B1|HNRNPAB|HNRNPC|HNRNPD|HNRNPK|MBNL1|MLH1|HNRNPM|CNOT2|ROCK1|SRSF2|SFSWAP|SNRNP70|SRPK2|SUPT5H|SUPT6H|RBM10|QKI|RBM39|WTAP|SAFB2|PAN2|MBNL2|RIDA|DDX17|PAIP1|KHDRBS3|CELF1|CELF2|SRSF10|PAPOLA|RNPS1|FASTK|CPSF6|PUF60|CPEB3|EXOSC7|TNRC6B|PUM2|RBFOX2|DAZAP1|LSM1|TRA2A|RBM11|RBFOX1|SAMD4B|CELF4|PCBP4|METTL14|CELF5|CPEB1|RBM15|FTO|PTCD2|SLTM|PRR5L|TIRAP|RBF…	-2.2
GO Biological Processes	GO:0045197	establishment or maintenance of epithelial cell apical/basal polarity	-4.7	RHOA|DLG1|DLG2|DLG4|MARK2|FAT1|ILK|OPHN1|LIN7A|DLG5|PATJ|MTCL1|PDZD11|SYNJ2BP|ERBIN|PARD3|LRRC7|PALS1|IFT20	-2.2
GO Biological Processes	GO:0016358	dendrite development	-4.6	APP|RERE|CAMK2A|CDK5|CTNNA2|CTNND2|DAB1|DLG4|DVL1|ELAVL4|EPHB1|EPHB3|FYN|MAP1A|MAP2|PAK3|STRN|PICALM|IQSEC1|ABI1|BTBD3|SRGAP2|MAPK8IP2|RBFOX2|SS18L1|MINK1|SHANK1|TRAPPC4|ABITRAM|MAP1S|KIDINS220|PPP1R9B|SHANK3	-2.1
GO Biological Processes	GO:0000381	regulation of alternative mRNA splicing, via spliceosome	-4.6	FMR1|HNRNPA1|MBNL1|SRSF2|RBM10|WTAP|MBNL2|DDX17|KHDRBS3|CELF1|CELF2|RNPS1|PUF60|RBFOX2|RBM11|RBFOX1|CELF4|CELF5|RBM15|RBFOX3|RBM24	-2.1
GO Biological Processes	GO:0048791	calcium ion-regulated exocytosis of neurotransmitter	-4.6	STXBP1|SYT1|SYT5|SYT7|RIMS2|RIMS3|UNC13B|RIMS1|UNC13A	-2
GO Biological Processes	GO:0030100	regulation of endocytosis	-4.5	BIN1|ARRB2|CD63|AP2M1|CLU|DLG4|FMR1|HFE|HNRNPK|HPCA|LRP1|OPHN1|PPP3CB|RAB5C|ROCK1|ATXN2|SNCA|SRC|TFR2|TSC2|VEGFA|PICALM|NUMB|VAMP4|SYNJ1|MTMR2|ZFYVE16|DNAJC6|SNAP91|TNK2|FLOT1|ABCA7|RAB31|RAB21|NEDD4L|CLIP3|RABGEF1|PACSIN3|PACSIN1|CALY|SYNJ2BP|RUFY2|ARFGAP1|SLC17A7|MCTP1|SGIP1|ATAD1|ANKRD13B|GSG1L|ANKRD13D	-2
GO Biological Processes	GO:0031644	regulation of nervous system process	-4.4	ADORA1|APP|DAG1|DLG4|DVL1|FMR1|GRIN1|GRIN2A|GRM1|MAG|OPRL1|PRKAR1B|PRKCZ|SLC8A2|SLC8A3|SRC|MTMR2|DLGAP1|NRXN1|RIMS2|AKAP9|UNC13B|WASF3|KLK8|MGLL|DLGAP4|RIMS1|SHANK1|NLGN3|PARD3|CELF4|BEGAIN|JAM2|TMEM108|TMEM25|SHANK3|ATPSCKMT|SHISA6|SHISA7	-1.9
GO Biological Processes	GO:0050806	positive regulation of synaptic transmission	-4.4	ADCY8|ADORA1|APP|ARRB2|CDK5|DLG4|FMR1|GLUL|GRIN1|GRIN2A|MPP2|NFATC4|NRGN|NTRK2|PRKAR1B|PRKCG|PRKCZ|RASGRF2|SLC8A2|SLC8A3|SNAP25|SNCA|STX3|STXBP1|SYT1|NRXN1|RIMS2|RIMS3|FLOT1|RIMS1|CRTC1|SLC24A2|ZDHHC3|NLGN3|SHANK3|SHISA7	-1.9
GO Biological Processes	GO:0048813	dendrite morphogenesis	-4.3	RERE|CDK5|CTNNA2|CTNND2|DLG4|DVL1|ELAVL4|EPHB1|EPHB3|FYN|MAP2|PAK3|PICALM|ABI1|BTBD3|MAPK8IP2|RBFOX2|MINK1|SHANK1|ABITRAM|KIDINS220|SHANK3	-1.8
GO Biological Processes	GO:0008088	axo-dendritic transport	-4.3	APBA1|APP|KIF1A|AP3S1|DLG2|FLOT2|KIF5A|KLC1|MAP1A|MAPT|OPA1|PAFAH1B1|SPAST|WASF1|AP3D1|AP3S2|TRAK1|RAB21|MAPK8IP3|FBXW11|BLOC1S6|CALY|KLC2|TMEM108|TRIM46	-1.8
GO Biological Processes	GO:0061245	establishment or maintenance of bipolar cell polarity	-4.2	RHOA|DLG1|DLG2|DLG4|MARK2|FAT1|ILK|OPHN1|LIN7A|DLG5|PATJ|MTCL1|PDZD11|SYNJ2BP|ERBIN|PARD3|LRRC7|PALS1|IFT20	-1.8
GO Biological Processes	GO:0035088	establishment or maintenance of apical/basal cell polarity	-4.2	RHOA|DLG1|DLG2|DLG4|MARK2|FAT1|ILK|OPHN1|LIN7A|DLG5|PATJ|MTCL1|PDZD11|SYNJ2BP|ERBIN|PARD3|LRRC7|PALS1|IFT20	-1.8
GO Biological Processes	GO:0048168	regulation of neuronal synaptic plasticity	-4.2	APP|CAMK2A|CAMK2B|DBN1|DLG4|GRIN1|GRIN2A|GRM5|KRAS|SLC8A2|SNCA|CNTN2|PPFIA3|NCDN|NSMF|SLC4A10|MCTP1|SHANK3|SHISA6|SHISA7	-1.8
GO Biological Processes	GO:0071625	vocalization behavior	-4.2	BRINP1|DLG4|NRXN3|NRXN1|NRXN2|SHANK1|NLGN3|MYH14|SHANK3	-1.7
GO Biological Processes	GO:0048814	regulation of dendrite morphogenesis	-4.2	ADGRB3|CAMK2B|CUX1|DBN1|GSK3B|NEDD4|NFATC4|PAFAH1B1|PAK3|PTPRD|STK11|PQBP1|LZTS1|RAB21|NEDD4L|OBSL1|NSMF|SS18L1|PARP6|CAPRIN2|BHLHB9|KNDC1	-1.7
GO Biological Processes	GO:0035235	ionotropic glutamate receptor signaling pathway	-4.2	APP|GRIA1|GRIA2|GRIA3|GRID1|GRIK1|GRIK4|GRIK5|GRIN1|GRIN2A|PLP1|GRIN3B	-1.7
GO Biological Processes	GO:1990806	ligand-gated ion channel signaling pathway	-4.2	APP|GRIA1|GRIA2|GRIA3|GRID1|GRIK1|GRIK4|GRIK5|GRIN1|GRIN2A|PLP1|GRIN3B	-1.7
GO Biological Processes	GO:1990778	protein localization to cell periphery	-4.1	ACTN2|AKT2|ANK2|ANK3|ARL3|ATP1B3|CD81|DLG1|DLG4|DPP6|FLOT2|GRIN2A|JUP|KCNB1|AFDN|PRKCZ|PTCH1|ROCK1|SNAP25|STX3|STXBP1|TUB|SLMAP|PIP5K1A|LIN7A|RABEP1|RAB3D|PREPL|ARFRP1|FLOT1|ARL6IP5|RAB31|NFASC|EPB41L3|RAB26|PACSIN1|PDZD11|ZDHHC3|CCDC88A|GRIPAP1|GPR158|WDR19|SPTBN4|RAB40C|PALS1|PHAF1|KCNIP4|PPP1R9B|SYS1|IFT20|MYADM|TTC7B|FAM126B|RAB15	-1.7
GO Biological Processes	GO:1902430	negative regulation of amyloid-beta formation	-4.1	BIN1|CLU|NTRK2|ROCK1|RTN1|RTN2|SORL1|RTN3|ABCA7|RTN4	-1.7
GO Biological Processes	GO:1901799	negative regulation of proteasomal protein catabolic process	-4	HFE|MAP1A|OPHN1|PRKCG|SGTA|TAF9|BAG6|OGT|EIF3H|PSMF1|USP19|TLK2|PARK7|WAC|UCHL5|TRIM39|MARCHF7|PSME3IP1	-1.6
GO Biological Processes	GO:0042177	negative regulation of protein catabolic process	-3.7	FYN|GRIN2A|HFE|MAP1A|NELL1|OPHN1|PRKCG|ROCK1|SGTA|SNCA|SNRNP70|TAF9|TIMP4|BAG6|OGT|EIF3H|SNX3|PSMF1|MAD2L2|USP19|TLK2|PARK7|SIRT2|MYCBP2|ATP13A2|HIPK2|WAC|ATRAID|UCHL5|TRIM39|RIC1|MARCHF7|PSME3IP1|AZIN2	-1.3
GO Biological Processes	GO:0060078	regulation of postsynaptic membrane potential	-3.7	ADORA1|ARRB2|CDK5|CHRND|GABBR1|GABRA2|GABRA3|GABRA6|GABRG2|GLRA2|GRIA1|GRIA3|GRID1|GRIK1|GRIK4|GRIK5|GRIN1|GRIN2A|GRM1|GRM5|GSK3B|MPP2|SNCA|MAPK8IP2|NLGN3|SEZ6	-1.3
GO Biological Processes	GO:0050773	regulation of dendrite development	-3.7	RHOA|ADGRB3|CAMK2B|CUX1|DGKG|DBN1|ELAVL4|GSK3B|NEDD4|NFATC4|PAFAH1B1|PAK3|PTPRD|STK11|PQBP1|LZTS1|RAB21|NEDD4L|OBSL1|CRTC1|NSMF|SS18L1|PACSIN1|PARP6|CAPRIN2|BHLHB9|RTN4IP1|KNDC1|SEZ6	-1.3
GO Biological Processes	GO:0032515	negative regulation of phosphoprotein phosphatase activity	-3.6	FKBP1A|GNAI2|GSK3B|MGAT5|PTPA|ROCK1|PPP1R11|PPP4R4|PPP1R1B|PPP1R9B|BOD1	-1.3
GO Biological Processes	GO:0001505	regulation of neurotransmitter levels	-3.6	ACHE|APBA1|DAGLA|CAMK2A|CDK5|CTBP2|DVL1|FMR1|GABRA2|GRM4|GSK3B|SEPTIN5|PRKCB|PRKCG|PTPRN2|SLC1A2|SNAP25|SNCA|STX3|STXBP1|SYT1|SYT5|ALDH5A1|PPFIA3|CASK|CADPS|LIN7A|SYNJ1|SYT7|NRXN1|NRXN2|PREPL|SNCAIP|RIMS2|RIMS3|FLOT1|UNC13B|PARK7|RPH3A|RIMS1|UNC13A|PIP5K1C|BACE1|ERC2|BLOC1S6|PCLO|PDZD11|MCTP1|STXBP5	-1.2
GO Biological Processes	GO:0010970	transport along microtubule	-3.5	APBA1|APP|ARL3|KIF1A|AP3S1|DLG2|FLOT2|KIF5A|KLC1|MAP1A|MAPT|OPA1|PAFAH1B1|PCM1|PEX14|PRKCZ|SPAST|TUB|UBB|WASF1|AP3D1|AP3S2|TRAK1|RAB21|MAPK8IP3|FBXW11|SUN1|CLIP3|BLOC1S6|CALY|DYNC2LI1|MAP1S|ARHGAP21|WDR19|KLC2|TMEM108|TRIM46|FUZ|RHOT2|IFT20|BBS12|BORCS8	-1.1
GO Biological Processes	GO:1902991	regulation of amyloid precursor protein catabolic process	-3.5	BIN1|CASP3|CLU|FKBP1A|FLOT2|NTRK2|ROCK1|RTN1|RTN2|SORL1|PICALM|RANBP9|RTN3|ABCA7|RTN4	-1.1
GO Biological Processes	GO:0048278	vesicle docking	-3.5	CTBP2|KCNB1|SNAP25|STX3|STXBP1|SYT1|PPFIA3|STX16|STX8|RAB3D|UNC13B|YKT6|UNC13A|EXOC6B|EXOC7|BLOC1S6|EXOC1|EXOC2|NDRG4|TSNARE1|RAB15	-1.1
GO Biological Processes	GO:0016185	synaptic vesicle budding from presynaptic endocytic zone membrane	-3.4	AP3S1|DNM1|PICALM|AP3D1|SNAP91|AP3S2	-1.1
GO Biological Processes	GO:0000245	spliceosomal complex assembly	-3.4	SRSF5|SFSWAP|SRPK2|GCFC2|DDX39B|ZRSR2|CELF1|CELF2|SRSF10|TXNL4A|PSIP1|PUF60|SF3B1|LUC7L3|PRPF39|LUC7L|CELF4|PTBP2|CELF5	-1.1
GO Biological Processes	GO:0099601	regulation of neurotransmitter receptor activity	-3.4	APP|DAPK1|DLG4|RASGRF2|SLC6A9|SRC|DLGAP1|AKAP9|DLGAP4|MAPK8IP2|MINK1|SHANK1|NLGN3|BEGAIN|LYNX1|SHANK3|GSG1L|SHISA6|SHISA7	-1.1
GO Biological Processes	GO:0006376	mRNA splice site selection	-3.4	SRSF5|SFSWAP|CELF1|CELF2|SRSF10|PSIP1|PUF60|LUC7L3|PRPF39|LUC7L|CELF4|PTBP2|CELF5	-1.1
GO Biological Processes	GO:0006475	internal protein amino acid acetylation	-3.4	APBB1|HCFC1|MAPT|MLLT1|ATXN7|TAF9|BAG6|KAT6A|NCOA3|TRRAP|OGT|RUVBL1|NCOA1|KAT2B|LDB1|GTF3C4|SUPT7L|ZMPSTE24|BRD8|JADE2|BRD1|ZZZ3|EPC2|BRPF3|PHF20L1|PHF20|MBIP|MBD3|SUPT20H|DMAP1|MEAF6|ATAT1|MSL1	-1.1
GO Biological Processes	GO:1903363	negative regulation of cellular protein catabolic process	-3.4	HFE|MAP1A|NELL1|OPHN1|PRKCG|SGTA|TAF9|BAG6|OGT|EIF3H|PSMF1|USP19|TLK2|PARK7|ATP13A2|HIPK2|WAC|ATRAID|UCHL5|TRIM39|RIC1|MARCHF7|PSME3IP1	-1.1
GO Biological Processes	GO:0021954	central nervous system neuron development	-3.3	ADARB1|CDK5|EPHB1|EPHB3|EPHB6|FGFR2|MAP2|MAPT|NFIB|NTRK2|NR4A2|PAFAH1B1|CNTN2|UBB|B4GALT6|SLIT2|MYCBP2|NIN|ZMIZ1|SLC4A10|SPTBN4|PALS1|TCTN1|DCLK2	-1
GO Biological Processes	GO:0007613	memory	-3.3	ADCY8|CAMK4|BRINP1|GRIA1|GRIN2A|MAP1A|MAPT|NFATC4|PPP3CB|PRKCZ|SCN2A|SGK1|SLC8A2|SLC8A3|ABCC8|PJA2|ABCA7|EHMT2|KLK8|CPEB3|CIC|PLCB1|CRTC1|ADNP|SLC24A2|SHANK1|KCNK10|PAK5|ATAD1|SHANK3|ATXN1L|SHISA7	-1
GO Biological Processes	GO:0006892	post-Golgi vesicle-mediated transport	-3.2	ANK3|ARL3|AP3S1|EPS15|MYO1B|SORL1|AP1G2|AP3D1|RABEP1|SCAMP1|PREPL|ARFRP1|AP3S2|RAB31|DOP1A|MON2|VPS13A|EXOC6B|RAB26|CCDC93|AP1AR|EXOC1|EXOC2|RBSN|PHAF1|SYS1|OSBPL5	-0.97
GO Biological Processes	GO:0030534	adult behavior	-3.2	APP|ARRB2|CDK5|DAB1|EPS8|GABRG2|NR4A2|PAFAH1B1|PBX3|SEPTIN5|SCN1A|SLC1A2|SNCA|CNTN2|TMOD1|NRXN3|NRXN1|NRXN2|ZMPSTE24|CHL1|EHMT2|PARK7|NCSTN|HTRA2|HIPK2|SHANK1|NLGN3|OXR1|CHD7|SPTBN4|PPP1R1B|SHANK3|SEZ6	-0.93
GO Biological Processes	GO:0021942	radial glia guided migration of Purkinje cell	-3.2	RERE|CTNNA2|DAB1|RBFOX2	-0.92
GO Biological Processes	GO:0018393	internal peptidyl-lysine acetylation	-3.1	APBB1|HCFC1|MLLT1|ATXN7|TAF9|BAG6|KAT6A|NCOA3|TRRAP|OGT|RUVBL1|NCOA1|KAT2B|LDB1|GTF3C4|SUPT7L|ZMPSTE24|BRD8|JADE2|BRD1|ZZZ3|EPC2|BRPF3|PHF20L1|PHF20|MBIP|MBD3|SUPT20H|DMAP1|MEAF6|ATAT1|MSL1	-0.9
GO Biological Processes	GO:1903649	regulation of cytoplasmic transport	-3.1	MAP2|MAPK3|SORL1|SRC|EIPR1|SNX3|MTMR2|ATP9A|RAB21|CHMP3|TRIM46|DENND10	-0.9
GO Biological Processes	GO:0048489	synaptic vesicle transport	-3.1	CDK5|AP3S1|DNM1|KIF5A|SNCA|PICALM|LIN7A|SYNJ1|AP3D1|SNAP91|AP3S2|BLOC1S6|TRIM46	-0.86
GO Biological Processes	GO:0098930	axonal transport	-3.1	KIF1A|AP3S1|DLG2|KIF5A|MAP1A|MAPT|OPA1|PAFAH1B1|SPAST|AP3D1|AP3S2|TRAK1|RAB21|MAPK8IP3|FBXW11|BLOC1S6|CALY|TMEM108|TRIM46	-0.85
GO Biological Processes	GO:0048259	regulation of receptor-mediated endocytosis	-3.1	ARRB2|CD63|AP2M1|CLU|DLG4|FMR1|HFE|HNRNPK|HPCA|OPHN1|ATXN2|VEGFA|PICALM|NUMB|SYNJ1|MTMR2|DNAJC6|SNAP91|TNK2|FLOT1|RAB21|RABGEF1|SGIP1|ATAD1|ANKRD13B|GSG1L|ANKRD13D	-0.85
GO Biological Processes	GO:0030705	cytoskeleton-dependent intracellular transport	-3.1	ACTN4|APBA1|APP|ARL3|KIF1A|AP3S1|DLG2|FLOT2|KIF5A|KLC1|MAP1A|MAPT|MYO1B|OPA1|PAFAH1B1|PCM1|PEX14|PRKCZ|SPAST|TUB|UBB|WASF1|AP3D1|AP3S2|TRAK1|RAB21|MAPK8IP3|FBXW11|SUN1|CLIP3|TANC2|BLOC1S6|HOOK2|CALY|DYNC2LI1|FNBP1L|MAP1S|CCDC88A|ARHGAP21|WDR19|KLC2|TMEM108|TRIM46|FUZ|RHOT2|IFT20|BBS12|BORCS8	-0.85
GO Biological Processes	GO:1903421	regulation of synaptic vesicle recycling	-3.1	CDK5|AP2M1|PPP3CB|ROCK1|SNCA|VAMP4|PLAA|GRIPAP1|SLC17A7	-0.84
GO Biological Processes	GO:0043666	regulation of phosphoprotein phosphatase activity	-3.1	FKBP1A|GNAI2|GSK3B|MGAT5|PPP1R12A|PTPA|ROCK1|PPP1R11|PPP6R2|PPP6R1|VRK3|PPP6R3|SLC39A10|PPP4R4|PPP1R1B|PPP1R9B|BOD1	-0.84
GO Biological Processes	GO:0106027	neuron projection organization	-3.1	APP|CTNND2|DCTN1|DLG4|DVL1|EPHB1|EPHB3|FYN|GSK3B|MAP1A|PAK3|PLS1|MTMR2|SHANK1|SHANK3	-0.84
GO Biological Processes	GO:0070050	neuron cellular homeostasis	-3	ADORA1|ATP2B1|ATP2B2|ATP2B3|CALB2|DCTN1|MAP1A|CX3CL1|SLC8A2|TSPOAP1|TMEM175	-0.83
GO Biological Processes	GO:0021952	central nervous system projection neuron axonogenesis	-3	ADARB1|EPHB1|EPHB3|EPHB6|NFIB|NR4A2|PAFAH1B1|SLIT2|MYCBP2|NIN|SPTBN4	-0.83
GO Biological Processes	GO:0099509	regulation of presynaptic cytosolic calcium ion concentration	-3	ADORA1|ATP2B1|ATP2B2|ATP2B3|CALB2|TSPOAP1	-0.83
GO Biological Processes	GO:0097484	dendrite extension	-3	SH3GL2|STK11|WASF1|AUTS2|CYFIP2|TMEM108	-0.83
GO Biological Processes	GO:0070142	synaptic vesicle budding	-3	AP3S1|DNM1|PICALM|AP3D1|SNAP91|AP3S2	-0.83
GO Biological Processes	GO:2000463	positive regulation of excitatory postsynaptic potential	-3	DLG4|DVL1|GRIN1|GRIN2A|PRKAR1B|PRKCZ|NRXN1|RIMS2|RIMS1|SHANK1|NLGN3|SHANK3	-0.79
GO Biological Processes	GO:0021955	central nervous system neuron axonogenesis	-3	ADARB1|EPHB1|EPHB3|EPHB6|NFIB|NR4A2|PAFAH1B1|B4GALT6|SLIT2|MYCBP2|NIN|SPTBN4|TCTN1	-0.76
GO Biological Processes	GO:0099558	maintenance of synapse structure	-2.9	ADGRB3|CTBP2|DCTN1|DLG1|DLG4|OPHN1|ERC2|PCLO|SDF4|CBLN2	-0.76
GO Biological Processes	GO:0018394	peptidyl-lysine acetylation	-2.9	APBB1|HCFC1|MLLT1|ATXN7|TAF9|BAG6|KAT6A|NCOA3|TRRAP|OGT|RUVBL1|NCOA1|KAT2B|LDB1|GTF3C4|SUPT7L|ZMPSTE24|BRD8|JADE2|BRD1|ZZZ3|EPC2|BRPF3|PHF20L1|PHF20|MBIP|MBD3|SUPT20H|DMAP1|MEAF6|ATAT1|MSL1	-0.76
GO Biological Processes	GO:0007528	neuromuscular junction development	-2.9	ANK3|APP|CACNB4|DCTN1|DVL1|FNTA|NEDD4|PPFIBP2|PPFIBP1|DNAJA3|UNC13B|PDZRN3|UNC13A|ALS2	-0.76
GO Biological Processes	GO:0008654	phospholipid biosynthetic process	-2.9	CHKA|CHKB|DGKG|FDPS|FADS1|PIGF|PI4KB|PIP4K2A|PLD2|PIP5K1A|PIP4K2B|MTMR1|DPM2|INPP4B|SOCS2|SYNJ1|MTMR3|MTMR2|MTMR4|GGPS1|PCYT1B|PIGL|PGS1|PITPNM1|PIGK|PLAAT3|PIP5K1C|SLC44A1|PISD|INPP5J|SOCS7|ABHD5|PIGT|PIGX|VAC14|CHPT1|SLC44A2|SERINC1|MPPE1|DHDDS|ITPKC|PTDSS2|FAR1|GPAT3|PIGU|GPAT4|SAMD8|TTC7B|LPCAT4|SERINC5|SGMS1|FAM126B	-0.75
GO Biological Processes	GO:0070507	regulation of microtubule cytoskeleton organization	-2.9	APC|RHOA|ARL2|CLTC|DCTN1|DYRK1A|MARK2|GSK3B|MAP1A|MAP2|MAPT|PAFAH1B1|ROCK1|ATXN7|SNCA|SPAST|ARHGEF7|AKAP9|PATJ|APC2|TUBB4A|MAPRE2|FAM107A|PHLDB1|CLASP1|CLIP3|INPP5J|NIN|CHMP3|MAP1S|ATAT1|DIXDC1|NAV3|BMERB1|TTBK2|MAPK15|EML3	-0.7
GO Biological Processes	GO:0048025	negative regulation of mRNA splicing, via spliceosome	-2.9	DYRK1A|HNRNPA2B1|HNRNPK|SFSWAP|RBM10|SRSF10|RNPS1|CELF4|PCBP4	-0.69
GO Biological Processes	GO:0043543	protein acylation	-2.8	APBB1|GLUL|HCFC1|MAPT|MLLT1|ATXN7|TAF9|BAG6|KAT6A|NCOA3|TRRAP|OGT|RUVBL1|NCOA1|KAT2B|LDB1|GTF3C4|SUPT7L|ZMPSTE24|BRD8|JADE2|BRD1|CLIP3|ZZZ3|EPC2|NAT9|BRPF3|ZDHHC1|PHF20L1|ZDHHC9|PHF20|ZDHHC3|MBIP|MBD3|SUPT20H|DMAP1|MEAF6|PORCN|ATAT1|ZDHHC16|ZDHHC20|MSL1	-0.68
GO Biological Processes	GO:0035308	negative regulation of protein dephosphorylation	-2.8	FKBP1A|GNAI2|GSK3B|MGAT5|PPP1R8|PTPA|ROCK1|PPP1R11|PPP4R4|PPP1R1B|PPP1R9B|BOD1	-0.68
GO Biological Processes	GO:0035176	social behavior	-2.8	BRINP1|DLG4|DVL1|GRID1|PCM1|SEPTIN5|NRXN3|NRXN1|NRXN2|CIC|VPS13A|MAPK8IP2|SHANK1|NLGN3|SHANK3|ATXN1L	-0.67
GO Biological Processes	GO:0051703	biological process involved in intraspecies interaction between organisms	-2.8	BRINP1|DLG4|DVL1|GRID1|PCM1|SEPTIN5|NRXN3|NRXN1|NRXN2|CIC|VPS13A|MAPK8IP2|SHANK1|NLGN3|SHANK3|ATXN1L	-0.67
GO Biological Processes	GO:0043113	receptor clustering	-2.8	CDK5|DLG1|DLG2|DLG4|DVL1|FNTA|GRIK5|ITGB2|DNAJA3|NRXN1|NRXN2|SYNJ2BP|LRRC7|WDR19|SHANK3|SHISA7	-0.67
GO Biological Processes	GO:0006904	vesicle docking involved in exocytosis	-2.8	CTBP2|KCNB1|SNAP25|STXBP1|PPFIA3|RAB3D|UNC13B|YKT6|UNC13A|EXOC6B|EXOC7|BLOC1S6|EXOC1|EXOC2|RAB15	-0.67
GO Biological Processes	GO:0097479	synaptic vesicle localization	-2.8	CDK5|AP3S1|DNM1|KIF5A|SNCA|PICALM|LIN7A|SYNJ1|AP3D1|SNAP91|AP3S2|BLOC1S6|PCLO|TRIM46	-0.67
GO Biological Processes	GO:1903051	negative regulation of proteolysis involved in cellular protein catabolic process	-2.8	HFE|MAP1A|OPHN1|PRKCG|SGTA|TAF9|BAG6|OGT|EIF3H|PSMF1|USP19|TLK2|PARK7|HIPK2|WAC|UCHL5|TRIM39|MARCHF7|PSME3IP1	-0.65
GO Biological Processes	GO:0016573	histone acetylation	-2.8	APBB1|HCFC1|MLLT1|ATXN7|TAF9|KAT6A|NCOA3|TRRAP|OGT|RUVBL1|NCOA1|KAT2B|LDB1|GTF3C4|SUPT7L|ZMPSTE24|BRD8|JADE2|BRD1|ZZZ3|EPC2|BRPF3|PHF20L1|PHF20|MBIP|MBD3|SUPT20H|DMAP1|MEAF6|MSL1	-0.64
GO Biological Processes	GO:0099111	microtubule-based transport	-2.7	APBA1|APP|ARL3|KIF1A|AP3S1|DLG2|FLOT2|GAS8|KIF5A|KLC1|MAP1A|MAPT|OPA1|PAFAH1B1|PCM1|PEX14|PRKCZ|SPAST|TUB|UBB|WASF1|AP3D1|AP3S2|TRAK1|RAB21|MAPK8IP3|FBXW11|SUN1|TTLL1|DPCD|CLIP3|BLOC1S6|CALY|DYNC2LI1|MAP1S|ARHGAP21|WDR19|KLC2|TMEM108|SPAG16|TRIM46|FUZ|RHOT2|IFT20|BBS12|BORCS8	-0.6
GO Biological Processes	GO:0008344	adult locomotory behavior	-2.7	APP|ARRB2|DAB1|EPS8|NR4A2|PAFAH1B1|PBX3|SCN1A|SNCA|CNTN2|TMOD1|ZMPSTE24|CHL1|PARK7|HTRA2|HIPK2|OXR1|CHD7|SPTBN4|SEZ6	-0.6
GO Biological Processes	GO:0006473	protein acetylation	-2.7	APBB1|HCFC1|MAPT|MLLT1|ATXN7|TAF9|BAG6|KAT6A|NCOA3|TRRAP|OGT|RUVBL1|NCOA1|KAT2B|LDB1|GTF3C4|SUPT7L|ZMPSTE24|BRD8|JADE2|BRD1|ZZZ3|EPC2|NAT9|BRPF3|PHF20L1|PHF20|MBIP|MBD3|SUPT20H|DMAP1|MEAF6|ATAT1|MSL1	-0.6
GO Biological Processes	GO:0034315	regulation of Arp2/3 complex-mediated actin nucleation	-2.7	CTNNA2|WASF1|GMFG|WASHC5|ABI2|NCKAP1|WASF3|ARFIP2|WASHC3|AP1AR|CARMIL1	-0.6
GO Biological Processes	GO:0050686	negative regulation of mRNA processing	-2.7	CCNT1|DYRK1A|HNRNPA2B1|HNRNPK|SFSWAP|SUPT5H|RBM10|SRSF10|RNPS1|CELF4|PCBP4	-0.6
GO Biological Processes	GO:0060996	dendritic spine development	-2.7	CAMK2A|CTNND2|DLG4|DVL1|EPHB1|EPHB3|PAK3|IQSEC1|SRGAP2|SHANK1|SHANK3	-0.6
GO Biological Processes	GO:0016081	synaptic vesicle docking	-2.7	CTBP2|SNAP25|PPFIA3|UNC13B|UNC13A|BLOC1S6	-0.6
GO Biological Processes	GO:0099566	regulation of postsynaptic cytosolic calcium ion concentration	-2.7	ATP2B2|GRIA1|GRM1|GRM5|ITPR1|SLC8A2	-0.6
GO Biological Processes	GO:1900452	regulation of long-term synaptic depression	-2.7	ADCY8|ADORA1|FMR1|KCNB1|MAPT|SHANK3	-0.6
GO Biological Processes	GO:0031111	negative regulation of microtubule polymerization or depolymerization	-2.7	APC|DYRK1A|MAP2|ATXN7|SNCA|ARHGEF7|APC2|TUBB4A|CLASP1|CLIP3|INPP5J|NAV3|BMERB1|TTBK2	-0.59
GO Biological Processes	GO:0051966	regulation of synaptic transmission, glutamatergic	-2.7	ADORA1|CDK5|GLUL|GRIK1|GRIN1|GRIN2A|GRM1|GRM4|GRM5|GRM7|GRM8|OPHN1|STXBP1|SYT1|NRXN1|PLPPR4|UNC13A|MAPK8IP2|NLGN3|ATAD1|SHANK3	-0.59
GO Biological Processes	GO:0031110	regulation of microtubule polymerization or depolymerization	-2.7	APC|ARL2|DCTN1|DYRK1A|MAP1A|MAP2|MAPT|ATXN7|SNCA|SPAST|ARHGEF7|AKAP9|APC2|TUBB4A|MAPRE2|CLASP1|CLIP3|INPP5J|NIN|MAP1S|NAV3|BMERB1|TTBK2	-0.59
GO Biological Processes	GO:0140029	exocytic process	-2.6	CTBP2|KCNB1|SEPTIN5|SNAP25|SNCA|STX3|STXBP1|PPFIA3|SYNJ1|RAB3D|UNC13B|YKT6|UNC13A|EXOC6B|EXOC7|ERC2|BLOC1S6|EXOC1|EXOC2|RAB15	-0.56
GO Biological Processes	GO:0072659	protein localization to plasma membrane	-2.6	ACTN2|AKT2|ANK2|ANK3|ATP1B3|CD81|DLG1|DPP6|FLOT2|JUP|KCNB1|AFDN|PRKCZ|PTCH1|ROCK1|STXBP1|SLMAP|PIP5K1A|RAB3D|PREPL|ARFRP1|FLOT1|ARL6IP5|RAB31|NFASC|EPB41L3|RAB26|PACSIN1|ZDHHC3|CCDC88A|GRIPAP1|GPR158|SPTBN4|RAB40C|PALS1|PHAF1|KCNIP4|SYS1|IFT20|MYADM|TTC7B|FAM126B|RAB15	-0.55
GO Biological Processes	GO:2000765	regulation of cytoplasmic translation	-2.6	DHX9|FMR1|HNRNPD|PKM|CNBP|PAIP1|CPEB3|ZNF385A|CPEB1|RBM24	-0.53
GO Biological Processes	GO:0033119	negative regulation of RNA splicing	-2.6	DYRK1A|HNRNPA2B1|HNRNPK|SFSWAP|RBM10|SRSF10|RNPS1|CELF4|PCBP4|PTBP2	-0.53
GO Biological Processes	GO:0035304	regulation of protein dephosphorylation	-2.6	ADORA1|FKBP1A|GNAI2|GSK3B|MGAT5|PPP1R12A|PPP1R7|PPP1R8|PTPA|ROCK1|PPP1R11|PPP6R2|PPP6R1|CAMTA1|NSMF|VRK3|PPP6R3|SLC39A10|PPP4R4|PPP1R1B|PPP1R9B|BOD1|CNEP1R1	-0.53
GO Biological Processes	GO:0018105	peptidyl-serine phosphorylation	-2.6	AKT2|ATR|CAMK4|CAMK2A|CAMK2D|CDK5|CLK1|DYRK1A|MARK2|GSK3B|ILK|MARK3|PRKCB|PRKCG|PRKCZ|ROCK1|RPS6KB2|SGK1|SRC|SRPK2|TGFBR1|MAP3K12|CAMK1|MKNK1|RIPK1|DYRK4|RPS6KA4|AKT3|TLK2|MAST3|ULK3|HIPK2|VRK3|CAMK1G|TTBK2|DCLK2|STK32A|HIPK1|RICTOR|STK32C|MAST4	-0.51
GO Biological Processes	GO:0046839	phospholipid dephosphorylation	-2.6	PLPP1|MTMR1|INPP4B|SYNJ1|MTMR3|MTMR2|MTMR4|INPP5J|PLPPR1|PLPPR2|PLPPR3|PIP4P1|PLPPR5|PLPP4	-0.51
GO Biological Processes	GO:1902003	regulation of amyloid-beta formation	-2.5	BIN1|CASP3|CLU|NTRK2|ROCK1|RTN1|RTN2|SORL1|PICALM|RTN3|ABCA7|RTN4	-0.5
GO Biological Processes	GO:0050775	positive regulation of dendrite morphogenesis	-2.5	CAMK2B|CUX1|DBN1|PAFAH1B1|PAK3|PTPRD|RAB21|OBSL1|SS18L1|PARP6|CAPRIN2|BHLHB9	-0.5
GO Biological Processes	GO:1990034	calcium ion export across plasma membrane	-2.5	ATP2B1|ATP2B3|SLC8A2|SLC24A4	-0.5
GO Biological Processes	GO:0035303	regulation of dephosphorylation	-2.5	ADORA1|FKBP1A|GNAI2|GSK3B|MGAT5|PPP1R12A|PPP1R7|PPP1R8|PTPA|ROCK1|SRC|PPP1R11|MTMR1|IQGAP1|MTMR3|MTMR2|MTMR4|PPP6R2|PPP6R1|CAMTA1|SMG6|NSMF|VRK3|PPP6R3|SLC39A10|PPP4R4|PPP1R1B|PPP1R9B|BOD1|CNEP1R1	-0.48
GO Biological Processes	GO:0002090	regulation of receptor internalization	-2.5	ARRB2|CD63|AP2M1|DLG4|FMR1|HPCA|OPHN1|ATXN2|VEGFA|NUMB|MTMR2|FLOT1|ATAD1|ANKRD13B|GSG1L|ANKRD13D	-0.47
GO Biological Processes	GO:0031115	negative regulation of microtubule polymerization	-2.5	DYRK1A|MAP2|SNCA|ARHGEF7|TUBB4A|CLIP3|INPP5J	-0.45
GO Biological Processes	GO:0016082	synaptic vesicle priming	-2.5	SNAP25|SNCA|STXBP1|SYNJ1|UNC13B|UNC13A|ERC2	-0.45
GO Biological Processes	GO:0023061	signal release	-2.5	CDK5|CRHR1|CTBP2|DVL1|GRM4|SMAD2|SEPTIN5|PTPRN2|SNAP25|SNCA|STX3|STXBP1|SYT1|SYT5|PPFIA3|CADPS|LIN7A|SYNJ1|SYT7|NRXN1|NRXN2|RIMS2|RIMS3|UNC13B|PARK7|RPH3A|RIMS1|UNC13A|PIP5K1C|ERC2|BLOC1S6|PCLO|PDZD11|PORCN|ILDR2	-0.45
GO Biological Processes	GO:0032388	positive regulation of intracellular transport	-2.5	ACTN2|AKT2|ANK3|CD81|CDK5|DHX9|FYN|GSK3B|HPCA|ITGB2|JUP|KCNB1|MAP2|NEDD4|PCM1|SORL1|STK11|TCF7L2|EIPR1|UBE2D3|CAMK1|HDAC3|MTMR2|FEZ1|SAE1|HUWE1|TENM1|CPSF6|CAPN10|ABLIM3|RAB21|MTCL1|HTRA2|CALY|STX18|MIEF1|DMAP1|MFF|XPO4|RIPOR1|PRR5L|TRIM46|EFCAB7	-0.45
GO Biological Processes	GO:0070936	protein K48-linked ubiquitination	-2.5	AMFR|IFI27|TTC3|UBE2D3|UBE2E2|UBE2G1|UBE2H|CUL1|BTRC|NEDD4L|KLHL3|UBE2T|RNF216|RNF126|FBXO38|RNF146|SYVN1|UBE2Q2	-0.45
GO Biological Processes	GO:0090314	positive regulation of protein targeting to membrane	-2.4	AKT2|ANK3|CDK5|FYN|HPCA|ITGB2|KCNB1|MTCL1|MIEF1|MFF	-0.42
GO Biological Processes	GO:0072583	clathrin-dependent endocytosis	-2.4	CANX|AP2M1|CLTC|ITSN1|PICALM|DNAJC6|SNAP91|FCHO1|PIP5K1C|FNBP1L|SGIP1	-0.42
GO Biological Processes	GO:0032435	negative regulation of proteasomal ubiquitin-dependent protein catabolic process	-2.4	HFE|MAP1A|SGTA|TAF9|BAG6|OGT|EIF3H|TLK2|PARK7|WAC|UCHL5|TRIM39	-0.42
GO Biological Processes	GO:0060999	positive regulation of dendritic spine development	-2.4	CAMK2B|DBN1|FMR1|PAFAH1B1|PAK3|CAMK1|DLG5|CPEB3|SHANK1|CAPRIN2|BHLHB9|SHANK3	-0.42
GO Biological Processes	GO:0009247	glycolipid biosynthetic process	-2.4	B4GALNT1|PIGF|ST3GAL1|ST3GAL4|ST3GAL3|B3GALT1|DPM2|ST3GAL5|LARGE1|B4GALT6|PIGL|PIGK|ST8SIA5|ST6GALNAC6|ST8SIA3|PIGT|PIGX|MPPE1|PIGU	-0.42
GO Biological Processes	GO:1990416	cellular response to brain-derived neurotrophic factor stimulus	-2.4	MAPT|NTRK2|SH3GL2|WASF1|TMEM108	-0.41
GO Biological Processes	GO:0071486	cellular response to high light intensity	-2.4	AKT2|SLC24A2|SLC24A4	-0.41
GO Biological Processes	GO:1905604	negative regulation of blood-brain barrier permeability	-2.4	SH3GL2|ABCC8|VEGFA	-0.41
GO Biological Processes	GO:0080120	CAAX-box protein maturation	-2.4	RAP1GDS1|RCE1|ZMPSTE24	-0.41
GO Biological Processes	GO:0009957	epidermal cell fate specification	-2.4	RBPJ|PTCH1|PTCH2	-0.41
GO Biological Processes	GO:0060997	dendritic spine morphogenesis	-2.4	CTNND2|DLG4|DVL1|EPHB1|EPHB3|PAK3|SHANK1|SHANK3	-0.4
GO Biological Processes	GO:0008089	anterograde axonal transport	-2.3	KIF1A|AP3S1|DLG2|KIF5A|MAP1A|SPAST|AP3D1|AP3S2|TRAK1|RAB21|MAPK8IP3|BLOC1S6|CALY|TRIM46	-0.37
GO Biological Processes	GO:0030866	cortical actin cytoskeleton organization	-2.3	CDK5|DLG1|EPB41L1|EPB41L2|PLEC|PLS1|ROCK1|NCKAP1|AKAP11|EPB41L3|ANLN|FHOD3|FMNL2	-0.35
GO Biological Processes	GO:0060998	regulation of dendritic spine development	-2.3	KIF1A|CAMK2B|DBN1|FMR1|PAFAH1B1|PAK3|PTPRS|CAMK1|DLG5|CPEB3|FSTL4|TANC2|SHANK1|CAPRIN2|BHLHB9|SHANK3	-0.34
GO Biological Processes	GO:0007628	adult walking behavior	-2.3	ARRB2|DAB1|SCN1A|CNTN2|ZMPSTE24|HTRA2|HIPK2|OXR1|CHD7|SPTBN4	-0.34
GO Biological Processes	GO:0010923	negative regulation of phosphatase activity	-2.3	FKBP1A|GNAI2|GSK3B|MGAT5|PTPA|ROCK1|PPP1R11|PPP4R4|PPP1R1B|PPP1R9B|BOD1	-0.34
GO Biological Processes	GO:0090313	regulation of protein targeting to membrane	-2.3	AKT2|ANK3|CDK5|FYN|GDI1|HPCA|ITGB2|KCNB1|MTCL1|MIEF1|MFF	-0.34
GO Biological Processes	GO:0014044	Schwann cell development	-2.3	AKT2|CDK5|DAG1|ILK|NTRK2|PLEC|ARHGEF10|MED12|SIRT2|PARD3|PALS1	-0.34
GO Biological Processes	GO:0035418	protein localization to synapse	-2.3	CDK5|DLG1|DLG2|DLG4|GRIN2A|KIF5A|MAP1A|SNAP25|STX3|NRXN1|NRXN2|MAPK8IP3|PCLO|SHANK1|GRIPAP1	-0.33
GO Biological Processes	GO:0070198	protein localization to chromosome, telomeric region	-2.3	ATR|ATRX|TPP1|XRCC5|ACD|TNKS2|ZNF827	-0.33
GO Biological Processes	GO:0002098	tRNA wobble uridine modification	-2.3	ELP1|ELP5|ELP3|TRMT9B|GTPBP3|CTU1|CTU2	-0.33
GO Biological Processes	GO:0042552	myelination	-2.2	AKT2|ANK2|CLU|DAG1|ILK|MAG|MBP|NTRK2|PLEC|PLP1|SCN2A|SLC8A3|CNTN2|BCAS1|MTMR2|B4GALT6|QKI|ARHGEF10|SIRT2|NFASC|EPB41L3|ACSBG1|NCSTN|PARD3|PALS1|SBF2|SERINC5	-0.3
GO Biological Processes	GO:0006898	receptor-mediated endocytosis	-2.2	ACHE|ARRB2|CANX|CD81|AP2M1|CLTC|DNM1|EPS15|GRK4|GRIA1|ITGB2|LRP1|NEDD4|PI4KB|ITSN1|SNAP25|SNCA|SORL1|CNTN2|TFR2|PICALM|AP1G2|WASF1|DNAJC6|SNAP91|RAB31|FCHO1|PIP5K1C|CALY|NLGN3|FNBP1L|TMEM108|SGIP1|REPS1|TPCN2	-0.28
GO Biological Processes	GO:1900271	regulation of long-term synaptic potentiation	-2.2	ADCY8|ADORA1|APP|CALB2|GSK3B|NRGN|PRKAR1B|CYP46A1|FAM107A|CRTC1|NCSTN|SHANK3|SHISA7	-0.28
GO Biological Processes	GO:0072384	organelle transport along microtubule	-2.2	KIF1A|AP3S1|KIF5A|MAPT|OPA1|PAFAH1B1|PEX14|PRKCZ|SPAST|UBB|WASF1|AP3D1|AP3S2|TRAK1|FBXW11|SUN1|BLOC1S6|MAP1S|ARHGAP21|TRIM46|RHOT2|BORCS8	-0.26
GO Biological Processes	GO:0051480	regulation of cytosolic calcium ion concentration	-2.2	ADCY8|ADORA1|ATP2B1|ATP2B2|ATP2B3|ATP2B4|CALB2|GRIA1|GRM1|GRM5|ITPR1|RYR1|SLC8A2|TRPC4|TSPOAP1	-0.26
GO Biological Processes	GO:0048013	ephrin receptor signaling pathway	-2.2	CHN1|EPHA5|EPHB1|EPHB3|EPHB6|FYN|NTRK3|PAK3|PTK2|SRC|SS18|TIAM1|ARHGEF7|ANKS1B|EPHA10	-0.26
GO Biological Processes	GO:0001764	neuron migration	-2.2	ASTN1|CDK5|DAB1|MARK2|FYN|GPM6A|NEO1|NRCAM|NTRK2|NTRK3|NR4A2|PAFAH1B1|PCM1|CNTN2|TOP2B|VEGFA|CHL1|SDCCAG8|ASTN2|ADGRL3|AUTS2|LRP12|ELP3|ZMIZ1|TRIM46|KIRREL3|DNER|ACAP3	-0.26
GO Biological Processes	GO:0022406	membrane docking	-2.2	CTBP2|KCNB1|ROCK1|SNAP25|STX3|STXBP1|SYT1|PPFIA3|STX16|SNX3|STX8|RAB3D|UNC13B|YKT6|UNC13A|EXOC6B|EXOC7|BLOC1S6|EXOC1|EXOC2|NDRG4|TSNARE1|RAB15	-0.25
GO Biological Processes	GO:0090659	walking behavior	-2.2	ARRB2|DAB1|SCN1A|CNTN2|ZMPSTE24|HTRA2|HIPK2|OXR1|CHD7|SPTBN4	-0.25
GO Biological Processes	GO:0002183	cytoplasmic translational initiation	-2.2	EIF2S3|EIF4A1|EIF4A2|EIF4B|EIF4G1|EIF4H|DENR|EIF3C|EIF3H|EIF3L	-0.25
GO Biological Processes	GO:0007272	ensheathment of neurons	-2.1	AKT2|ANK2|CLU|DAG1|ILK|MAG|MBP|NTRK2|PLEC|PLP1|SCN2A|SLC8A3|CNTN2|BCAS1|MTMR2|B4GALT6|QKI|ARHGEF10|SIRT2|NFASC|EPB41L3|ACSBG1|NCSTN|PARD3|PALS1|SBF2|SERINC5	-0.24
GO Biological Processes	GO:0008366	axon ensheathment	-2.1	AKT2|ANK2|CLU|DAG1|ILK|MAG|MBP|NTRK2|PLEC|PLP1|SCN2A|SLC8A3|CNTN2|BCAS1|MTMR2|B4GALT6|QKI|ARHGEF10|SIRT2|NFASC|EPB41L3|ACSBG1|NCSTN|PARD3|PALS1|SBF2|SERINC5	-0.24
GO Biological Processes	GO:1990504	dense core granule exocytosis	-2.1	STXBP1|CADPS|UNC13B|UNC13A	-0.24
GO Biological Processes	GO:1900449	regulation of glutamate receptor signaling pathway	-2.1	FYN|CX3CL1|FRRS1L|SHANK3	-0.24
GO Biological Processes	GO:0060304	regulation of phosphatidylinositol dephosphorylation	-2.1	MTMR1|MTMR3|MTMR2|MTMR4	-0.24
GO Biological Processes	GO:0001188	RNA polymerase I preinitiation complex assembly	-2.1	SMARCA4|UBTF|TAF1C|TAF1B|PIH1D1	-0.24
GO Biological Processes	GO:0099612	protein localization to axon	-2.1	ANK3|CNTN2|COPE|EPB41L3|TRIM46	-0.24
GO Biological Processes	GO:0007196	adenylate cyclase-inhibiting G protein-coupled glutamate receptor signaling pathway	-2.1	GRM1|GRM4|GRM5|GRM7|GRM8	-0.24
GO Biological Processes	GO:0018108	peptidyl-tyrosine phosphorylation	-2.1	DDR1|CHKA|CLK1|CLK2|DYRK1A|EPHA5|EPHB1|EPHB3|EPHB6|FGFR2|FYN|NEK1|NTRK2|NTRK3|DDR2|MAPK3|MAP2K5|MAP2K7|PTK2|MAP2K4|SRC|TIE1|DYRK4|ABI1|ABI2|TNK2|TESK2|HIPK2|CLK4|PEAK1|HIPK1|EPHA10	-0.24
GO Biological Processes	GO:0035305	negative regulation of dephosphorylation	-2.1	FKBP1A|GNAI2|GSK3B|MGAT5|PPP1R8|PTPA|ROCK1|PPP1R11|IQGAP1|PPP4R4|PPP1R1B|PPP1R9B|BOD1	-0.24
GO Biological Processes	GO:0060291	long-term synaptic potentiation	-2.1	GRIN2A|MPP2|NFATC4|NTRK2|PRKCG|PRKCZ|RASGRF2|SLC8A2|SLC8A3|SNAP25|SNCA|STX3|SLC24A2	-0.24
GO Biological Processes	GO:0031623	receptor internalization	-2.1	ACHE|ARRB2|CD81|AP2M1|CLTC|DNM1|GRK4|GRIA1|ITGB2|LRP1|NEDD4|SNAP25|SNCA|CNTN2|PICALM|RAB31|CALY	-0.22
GO Biological Processes	GO:0001574	ganglioside biosynthetic process	-2.1	B4GALNT1|ST3GAL1|ST3GAL3|ST3GAL5|B4GALT6|ST6GALNAC6|ST8SIA3	-0.22
GO Biological Processes	GO:1904353	regulation of telomere capping	-2	HNRNPD|NBN|MAPK3|MAP2K7|XRCC1|SMG6|TNKS2|MAPK15	-0.19
GO Biological Processes	GO:0000380	alternative mRNA splicing, via spliceosome	-2	DHX9|HNRNPM|SFSWAP|PQBP1|DDX17|PUF60|KDM1A|CELF4	-0.19
GO Biological Processes	GO:0035249	synaptic transmission, glutamatergic	-2	CDK5|GRIA2|GRID1|GRIK1|GRIK4|GRIK5|UNC13B|UNC13A|SLC17A7|ALS2	-0.19
GO Biological Processes	GO:0007632	visual behavior	-2	APP|CDK5|GRIN1|GRIN2A|KRAS|MEIS2|SLC1A2|ABCC8|ABCA7|DDHD2|NDRG4|PPP1R1B|IFT20	-0.17
GO Cellular Components	GO:0098794	postsynapse	-15	ACTN2|ADCY8|ADORA1|ANK2|ANK3|APBA1|APP|RHOA|ARRB2|ATP2B1|ATP2B2|ADGRB3|DAGLA|CAMK4|CAMK2A|CANX|CDH10|CDK5|CHRND|AP2M1|CTNND2|DAG1|DBN1|DLG1|DLG2|DLG4|DMD|DRP2|DVL1|EPS8|FMR1|FYN|GABBR1|GABRA2|GABRA3|GABRA6|GABRG2|GLRA2|GPM6A|GRIA1|GRIA2|GRIA3|GRID1|GRIK1|GRIK4|GRIK5|GRIN1|GRIN2A|GRM1|GRM5|GRM7|GSK3B|HPCA|ITPR1|KCNA3|KCNB1|KCND3|KCNMA1|KCNN2|MAPT|MPP2|NEDD4|NRCAM|NRGN|NTRK2|NTRK3|OPHN1|PAK3|PCBP2|…	-10
GO Cellular Components	GO:0030424	axon	-13	ADCY8|ADORA1|AMFR|BIN1|ANK3|APBB1|APBB2|APP|RHOA|ATP2B3|KIF1A|DAGLA|CALB2|CANX|CDK5|AP3S1|CTNNA2|CXADR|DAG1|DBN1|DCTN1|DLG1|DLG2|DLG4|DVL1|DYRK1A|ELAVL4|EPHA5|EPHB1|EPS8|FMR1|GABBR1|GABRA2|GABRG2|GDI1|GFRA1|GLUL|GPM6A|GRIA1|GRIK5|GRIN1|GRM7|GSK3B|HPCA|KCNA3|KCNB1|KIF5A|KLC1|L1CAM|MAG|MAP1A|MAP2|MAP4|MAPT|MBP|NEO1|NFIB|NRCAM|NRGN|NTRK2|NTRK3|OPA1|OPHN1|PAFAH1B1|PLEC|PRKCB|PRKCG|PRKCZ|PTCH1|PTPRS|R…	-9.3
GO Cellular Components	GO:0030425	dendrite	-12	ACTN2|ADCY2|ADCY8|ADORA1|AMFR|BIN1|ANK3|APBA1|APP|RHOA|ARRB2|ATP2B1|ATP2B2|KIF1A|DAGLA|CALB2|CAMK2A|CANX|CDK5|CKB|CLCN2|CLU|CTNND2|BRINP1|DBN1|DLG4|DMWD|DRP2|DVL1|DYRK1A|ELAVL4|MARK2|EPHA5|EPHB1|EPHB3|FLOT2|FMR1|FYN|GABBR1|GABRA2|GABRA3|GABRA6|GABRG2|GNAI2|GPM6A|GRIA1|GRIA2|GRIA3|GRIK5|GRIN1|GRIN2A|GRM1|GRM5|GRM7|GSK3B|HNRNPAB|HPCA|HTR4|KCNB1|KCND3|KCNN2|KIF5A|L1CAM|MAP1A|MAP2|MAPT|MARK3|MPP2|NED…	-8.3
GO Cellular Components	GO:0097447	dendritic tree	-12	ACTN2|ADCY2|ADCY8|ADORA1|AMFR|BIN1|ANK3|APBA1|APP|RHOA|ARRB2|ATP2B1|ATP2B2|KIF1A|DAGLA|CALB2|CAMK2A|CANX|CDK5|CKB|CLCN2|CLU|CTNND2|BRINP1|DBN1|DLG4|DMWD|DRP2|DVL1|DYRK1A|ELAVL4|MARK2|EPHA5|EPHB1|EPHB3|FLOT2|FMR1|FYN|GABBR1|GABRA2|GABRA3|GABRA6|GABRG2|GNAI2|GPM6A|GRIA1|GRIA2|GRIA3|GRIK5|GRIN1|GRIN2A|GRM1|GRM5|GRM7|GSK3B|HNRNPAB|HPCA|HTR4|KCNB1|KCND3|KCNN2|KIF5A|L1CAM|MAP1A|MAP2|MAPT|MARK3|MPP2|NED…	-8.3
GO Cellular Components	GO:0097060	synaptic membrane	-12	ADCY8|ADORA1|ANK2|ANK3|APBA1|ARRB2|ATP2B1|ATP2B2|ATP2B3|ATP2B4|DAGLA|CANX|CDH10|CHRND|DAG1|DBN1|DLG1|DLG2|DLG4|DMD|DNM1|FMR1|GABBR1|GABRA2|GABRA3|GABRA6|GABRG2|GLRA2|GPM6A|GRIA1|GRIA2|GRIA3|GRID1|GRIK1|GRIK4|GRIK5|GRIN1|GRIN2A|GRM1|GRM5|GRM7|KCNA3|KCNB1|KCND3|KCNMA1|NRCAM|NRGN|NTRK3|PRKCG|PTPRA|PTPRD|PTPRS|SCN2A|ITSN1|SLC1A2|SLC6A6|SLC6A9|SNAP25|STRN|STX3|STXBP1|SYT1|CNTN2|PICALM|CASK|LIN7A|SYNJ1…	-8.3
GO Cellular Components	GO:0098984	neuron to neuron synapse	-12	ADCY8|ADORA1|ARRB2|ATP2B2|DAGLA|CAMK2A|CDK5|CTNND2|DBN1|DLG1|DLG2|DLG4|DRP2|DVL1|EPS8|FMR1|FYN|GRIA1|GRIA2|GRID1|GRIK4|GRIK5|GRIN1|GRIN2A|GRM1|GRM5|GRM7|ITPR1|KCND3|MPP2|NRCAM|NRGN|NTRK2|PAK3|PCBP2|PRKAR1B|PRKCG|PRKCZ|PSD|PTCH1|PTPRD|PTPRS|RHEB|RPL38|RPS18|RPS25|SLC6A9|SLC8A2|SLC8A3|SRC|STRN|SYT1|TSC2|YWHAZ|RNF112|PKP4|CAMK1|LIN7A|MTMR2|SYT7|DLGAP1|DLG5|DNAJC6|PJA2|PLPPR4|IQSEC1|ABI1|AKAP9|LZTS1|…	-8.1
GO Cellular Components	GO:0099572	postsynaptic specialization	-11	ADCY8|ADORA1|ARRB2|ATP2B2|DAGLA|CAMK2A|CDH10|CDK5|CHRND|CTNND2|DBN1|DLG1|DLG2|DLG4|DRP2|DVL1|EPS8|FMR1|FYN|GABRA2|GABRA3|GABRG2|GRIA1|GRIA2|GRID1|GRIK5|GRIN1|GRIN2A|GRM1|GRM5|ITPR1|KCND3|MPP2|NRCAM|NRGN|NTRK2|PAK3|PCBP2|PRKCG|PRKCZ|PSD|PTCH1|PTPRS|RHEB|RPL38|RPS18|RPS25|SLC6A9|SLC8A2|SLC8A3|SRC|STRN|TSC2|RNF112|PKP4|CAMK1|LIN7A|MTMR2|DLGAP1|DLG5|DNAJC6|PJA2|PLPPR4|IQSEC1|ABI1|AKAP9|LZTS1|DLGAP4|C…	-7.8
GO Cellular Components	GO:0032279	asymmetric synapse	-10	ADCY8|ADORA1|ARRB2|ATP2B2|DAGLA|CAMK2A|CDK5|CTNND2|DBN1|DLG1|DLG2|DLG4|DRP2|DVL1|EPS8|FMR1|FYN|GRIA1|GRIA2|GRID1|GRIK5|GRIN1|GRIN2A|GRM1|GRM5|GRM7|ITPR1|KCND3|MPP2|NRCAM|NRGN|NTRK2|PAK3|PCBP2|PRKCG|PRKCZ|PSD|PTCH1|PTPRS|RHEB|RPL38|RPS18|RPS25|SLC6A9|SLC8A2|SLC8A3|SRC|STRN|TSC2|RNF112|PKP4|CAMK1|LIN7A|MTMR2|DLGAP1|DLG5|DNAJC6|PJA2|PLPPR4|IQSEC1|ABI1|AKAP9|LZTS1|CPEB3|ADGRL1|CRTC1|SRGAP2|MAPK8IP2|C…	-7.1
GO Cellular Components	GO:0098793	presynapse	-10	ADCY8|ADORA1|AMPH|BIN1|APBA1|APP|ATP2B1|ATP2B2|ATP2B3|ATP2B4|ATP6V1B2|ATP6V1C1|CALB2|CANX|CDH10|CDK5|AP2M1|AP3S1|CTBP1|CTBP2|DLG4|DNM1|DVL1|FMR1|GABBR1|GABRA2|GLUL|GPM6A|GRIA1|GRIK4|GRIK5|GRIN1|GRIN2A|GRM4|GRM7|KCNA3|NTRK2|OPHN1|PLD2|SEPTIN5|PRKCB|PRKCG|PTPRD|PTPRN2|PTPRS|SCN2A|ITSN1|SH3GL2|SLC1A2|SLC6A9|SLC8A2|SLC8A3|SNAP25|SNCA|STX3|STXBP1|ABCC8|SYT1|SYT5|RNF112|PICALM|PPFIBP2|PPFIBP1|PPFIA4|PP…	-7.1
GO Cellular Components	GO:0014069	postsynaptic density	-10	ADCY8|ADORA1|ARRB2|ATP2B2|DAGLA|CAMK2A|CDK5|CTNND2|DBN1|DLG1|DLG2|DLG4|DRP2|DVL1|EPS8|FMR1|FYN|GRIA1|GRIA2|GRID1|GRIK5|GRIN1|GRIN2A|GRM1|GRM5|ITPR1|KCND3|MPP2|NRCAM|NRGN|NTRK2|PAK3|PCBP2|PRKCG|PRKCZ|PSD|PTCH1|PTPRS|RHEB|RPL38|RPS18|RPS25|SLC6A9|SLC8A2|SLC8A3|SRC|STRN|TSC2|RNF112|PKP4|CAMK1|LIN7A|MTMR2|DLGAP1|DLG5|DNAJC6|PJA2|PLPPR4|IQSEC1|ABI1|AKAP9|LZTS1|CPEB3|ADGRL1|CRTC1|SRGAP2|MAPK8IP2|CADM1|…	-6.8
GO Cellular Components	GO:0098978	glutamatergic synapse	-9.9	ADCY8|BIN1|APBA1|RHOA|ATP2B1|ATP2B2|ATP2B3|ATP2B4|CAMK4|CANX|CDH10|CDK5|AP2M1|CTBP1|CTBP2|DAG1|DBN1|DLG1|DLG4|DNM1|DRP2|DVL1|ELAVL4|EPHB1|EPS8|FLOT2|GABBR1|GABRG2|GPM6A|GRIA1|GRID1|GRIK5|GRIN2A|GRM1|GRM5|GSK3B|HPCA|KCNA3|NRCAM|NRGN|NTRK3|OPHN1|PAK3|PPP3CB|PRKAR1B|PRKCZ|PTPRD|SCN2A|SH3GL2|SLC1A2|SNAP25|SRC|STX3|STXBP1|SYT1|VCP|YWHAZ|SPARCL1|CAMK1|PPFIA3|CADPS|NUMB|AP3D1|DLGAP1|TSPOAP1|PLPPR4|AKAP9…	-6.7
GO Cellular Components	GO:0044304	main axon	-9.1	ADORA1|BIN1|ANK3|APP|DAGLA|DAG1|DLG1|DLG2|DLG4|GABBR1|MAG|MAP1A|MAP2|MAPT|MBP|NRCAM|SCN1A|SCN2A|SLC1A2|CNTN2|TUBB4A|SIRT2|NFASC|EPB41L3|PARD3|LRRC7|SPTBN4|TRIM46	-5.9
GO Cellular Components	GO:0043025	neuronal cell body	-7.3	ADCY8|ADORA1|AMFR|APP|ASS1|ASTN1|ATP2B1|ATP2B2|CACNA1B|CANX|CASP3|CDK5|CKB|CLCN2|CTNND2|BRINP1|DCTN1|DLG2|DMWD|DRP2|DVL1|ELAVL4|EPHA5|FMR1|GABBR1|GABRA2|GDI1|GFRA1|GLUL|GPM6A|GRIA1|GRIA2|GRIK5|HCFC1|HPCA|KCNB1|KCND3|KCNN1|KCNN2|KIF5A|L1CAM|MAP1A|MAP2|MAPT|MBP|NRGN|PAFAH1B1|PAM|PDE1C|PRKCZ|PTPRS|RAP1GAP|SCN1A|CX3CL1|SLC6A6|SLC8A2|SLC8A3|SLC12A2|SNCA|SORL1|STRN|SYT5|TAC1|CNTN2|UBB|RNF112|PICALM|SOR…	-4.2
GO Cellular Components	GO:0048786	presynaptic active zone	-6.9	ADCY8|ADORA1|APBA1|APP|ATP2B1|ATP2B2|ATP2B4|CANX|CDH10|CTBP1|CTBP2|GPM6A|GRM7|STX3|STXBP1|PPFIBP2|PPFIBP1|PPFIA4|PPFIA1|PPFIA3|RIMS2|RIMS3|FLOT1|UNC13B|NTNG1|RIMS1|UNC13A|ERC2|PCLO|SLC17A7	-3.9
GO Cellular Components	GO:0005938	cell cortex	-6.8	ACTN4|ACTN2|AKT2|RHOA|CTBP1|CTBP2|DBN1|DCTN1|DLG4|DMD|EPB41L2|EPS8|FGF1|FGFR2|FLNB|FLOT2|GRK4|GRM7|LASP1|MOBP|MYH10|MYO9B|NEDD4|PAFAH1B1|PLS1|SEPTIN5|PRKCB|PRKCZ|PTK2|PXN|RYR1|SNCA|STIM1|TMOD1|TRPC4|PPFIA3|IQGAP1|ARHGEF7|RIMS2|RIMS3|C2CD2L|FLOT1|UNC13B|SEPTIN9|FRMPD1|TRAK1|RIMS1|UNC13A|FNBP1|PHLDB1|RHOBTB2|EXOC6B|ASTN2|EXOC7|CLASP1|ARFIP2|MYRIP|NSMF|ERC2|PCLO|ANLN|FNBP1L|RIC8B|PPP1R9A|EXOC1|EXOC2…	-3.9
GO Cellular Components	GO:0044297	cell body	-6.7	ADCY8|ADORA1|AMFR|APP|ASS1|ASTN1|ATP2B1|ATP2B2|CACNA1B|CANX|CASP3|CDK5|CKB|CLCN2|CTNND2|CXADR|BRINP1|DCTN1|DLG2|DMWD|DRP2|DVL1|ELAVL4|EPHA5|FMR1|FYN|GABBR1|GABRA2|GDI1|GFRA1|GLUL|GNAI2|GPM6A|GRIA1|GRIA2|GRIK5|HCFC1|HPCA|KCNB1|KCND3|KCNN1|KCNN2|KIF5A|L1CAM|MAP1A|MAP2|MAPT|MBP|NRGN|PAFAH1B1|PAM|PDE1C|PRKCZ|PTPN13|PTPRS|RAP1GAP|RPE65|SCN1A|CX3CL1|SLC1A2|SLC6A6|SLC8A2|SLC8A3|SLC12A2|SNCA|SORL1|STRN|S…	-3.8
GO Cellular Components	GO:0045211	postsynaptic membrane	-6.6	ADORA1|ANK2|ANK3|ARRB2|ATP2B2|DAGLA|CANX|CDH10|CHRND|DAG1|DBN1|DLG1|DLG2|DLG4|DMD|FMR1|GABBR1|GABRA2|GABRA3|GABRA6|GABRG2|GLRA2|GRIA1|GRIA2|GRIA3|GRID1|GRIK1|GRIK4|GRIK5|GRIN1|GRIN2A|GRM1|GRM5|GRM7|KCNA3|KCNB1|KCND3|KCNMA1|NRCAM|NRGN|NTRK3|PTPRS|SLC6A6|SLC6A9|STRN|CNTN2|PICALM|LIN7A|DNAJA3|GABBR2|PLPPR4|AKAP9|RPH3A|SYNE1|SRGAP2|SHANK1|TRAPPC4|ADAM22|FXYD6|NLGN3|SYNJ2BP|TENM2|ATAD1|IGSF21|SHANK3|G…	-3.8
GO Cellular Components	GO:0043197	dendritic spine	-6.5	ACTN2|ADORA1|APBA1|APP|RHOA|ARRB2|ATP2B1|ATP2B2|DAGLA|CAMK2A|CANX|DLG4|DVL1|FMR1|GABBR1|GPM6A|GRIA1|GRIA2|GRIA3|GRIN1|GRIN2A|GRM5|HPCA|KCND3|KCNN2|MAPT|MPP2|NEDD4|NRGN|NTRK2|OPHN1|PSD|PTK2|SLC8A2|SLC8A3|STRN|MTMR2|ABI2|LZTS1|RPH3A|SRGAP2|TANC2|SHANK1|PPP1R9A|ANKS1B|TENM2|ALS2|PPP1R9B|SHANK3|SEZ6|SHISA6|SHISA7	-3.7
GO Cellular Components	GO:0044309	neuron spine	-6.4	ACTN2|ADORA1|APBA1|APP|RHOA|ARRB2|ATP2B1|ATP2B2|DAGLA|CAMK2A|CANX|DLG4|DVL1|FMR1|GABBR1|GPM6A|GRIA1|GRIA2|GRIA3|GRIN1|GRIN2A|GRM5|HPCA|KCND3|KCNN2|MAPT|MPP2|NEDD4|NRGN|NTRK2|OPHN1|PSD|PTK2|SLC8A2|SLC8A3|STRN|MTMR2|ABI2|LZTS1|RPH3A|SRGAP2|TANC2|SHANK1|PPP1R9A|ANKS1B|TENM2|ALS2|PPP1R9B|SHANK3|SEZ6|SHISA6|SHISA7	-3.6
GO Cellular Components	GO:0042734	presynaptic membrane	-6	ADCY8|ADORA1|APBA1|ATP2B1|ATP2B2|ATP2B3|ATP2B4|CANX|CDH10|DNM1|FMR1|GABBR1|GPM6A|GRIK4|GRIK5|GRIN2A|KCNA3|PTPRD|SCN2A|ITSN1|SLC1A2|SLC6A9|SNAP25|STX3|STXBP1|SYT1|PICALM|CASK|SYT7|NRXN1|SNCAIP|RIMS2|RIMS3|SNAP91|UNC13B|NTNG1|ADGRL1|RIMS1|UNC13A|NCSTN|ERC2|FXYD6|DENND1A|IGSF21	-3.3
GO Cellular Components	GO:0150034	distal axon	-6	ADORA1|AMFR|BIN1|APBB1|APBB2|APP|CALB2|CDK5|CXADR|DBN1|DVL1|ELAVL4|EPS8|FMR1|GLUL|GPM6A|GRIK5|GRIN1|KCNA3|KLC1|L1CAM|MAP2|MAPT|NEO1|NTRK2|OPHN1|PAFAH1B1|PRKCB|PRKCG|PTCH1|PTPRS|SLC8A2|SLC8A3|SNAP25|SNCA|STX3|MAP3K12|IQGAP1|SYNJ1|AP3D1|TSPOAP1|FEZ1|ABI1|UNC13B|SRSF10|ADGRL1|SIRT2|UNC13A|MAPK8IP3|EXOC7|LAMP5|AUTS2|ERC2|TIAM2|INPP5J|PACSIN1|NIN|ABITRAM|SLC4A10|NDRG2|TENM2|ALS2|SHTN1|PTBP2|MYH14|GDPD…	-3.2
GO Cellular Components	GO:0030426	growth cone	-5.7	AMFR|APBB1|APBB2|APP|CDK5|CXADR|DBN1|DVL1|ELAVL4|EPS8|FMR1|GPM6A|KLC1|L1CAM|MAP2|MAPT|NEO1|PAFAH1B1|PTCH1|PTPRS|SNAP25|SNCA|STX3|MAP3K12|IQGAP1|FEZ1|ABI1|ADGRL1|SIRT2|MAPK8IP3|EXOC7|LAMP5|AUTS2|ERC2|TIAM2|INPP5J|NIN|ABITRAM|NDRG2|TENM2|ALS2|SHTN1|PTBP2|MYH14|GDPD5|PPP1R9B|ACAP3	-3
GO Cellular Components	GO:0008021	synaptic vesicle	-5.4	AMPH|BIN1|APBA1|APP|ATP2B1|ATP6V1B2|ATP6V1C1|DLG4|GABBR1|GABRA2|GRIA1|GRIN1|GRIN2A|SEPTIN5|PTPRN2|PTPRS|SLC6A9|SNAP25|SNCA|STX3|ABCC8|SYT1|SYT5|RNF112|PICALM|VAMP4|MTMR2|SYT7|SCAMP1|RAB3D|SNCAIP|SNAP91|SV2B|IQSEC1|DNM1L|UNC13B|RPH3A|UNC13A|NCSTN|BACE1|LAMP5|RAB26|TRAPPC4|SVOP|MFF|SLC17A7|RAB40C|MCTP1|PHAF1|KIRREL3|TRIM9|STXBP5|RAB15	-2.8
GO Cellular Components	GO:0030427	site of polarized growth	-5.3	AMFR|APBB1|APBB2|APP|CDK5|CXADR|DBN1|DVL1|ELAVL4|EPS8|FMR1|GPM6A|KLC1|L1CAM|MAP2|MAPT|NEO1|PAFAH1B1|PTCH1|PTPRS|SNAP25|SNCA|STX3|MAP3K12|IQGAP1|FEZ1|ABI1|ADGRL1|SIRT2|MAPK8IP3|EXOC7|LAMP5|AUTS2|ERC2|TIAM2|INPP5J|NIN|ABITRAM|NDRG2|TENM2|ALS2|SHTN1|PTBP2|MYH14|GDPD5|PPP1R9B|ACAP3	-2.6
GO Cellular Components	GO:0099240	intrinsic component of synaptic membrane	-5.2	ADCY8|ADORA1|ATP2B1|ATP2B2|ATP2B3|ATP2B4|DAGLA|CANX|CDH10|CHRND|DLG4|GABBR1|GABRA2|GABRA3|GABRG2|GPM6A|GRIA1|GRID1|GRIK4|GRIK5|GRIN2A|GRM5|KCNA3|KCND3|NRCAM|NTRK3|PTPRA|PTPRD|PTPRS|SCN2A|SLC1A2|SLC6A6|SLC6A9|CNTN2|SYT7|PLPPR4|NTNG1|NCSTN|ADAM22|FXYD6|NLGN3|LRFN5|GSG1L|SHISA6|SHISA7	-2.6
GO Cellular Components	GO:0099699	integral component of synaptic membrane	-5	ADCY8|ADORA1|ATP2B1|ATP2B2|ATP2B3|ATP2B4|DAGLA|CANX|CDH10|CHRND|GABBR1|GABRA2|GABRA3|GABRG2|GPM6A|GRIA1|GRID1|GRIK4|GRIK5|GRIN2A|GRM5|KCNA3|KCND3|NRCAM|NTRK3|PTPRA|PTPRD|PTPRS|SCN2A|SLC1A2|SLC6A6|SLC6A9|SYT7|PLPPR4|NCSTN|ADAM22|FXYD6|NLGN3|LRFN5|GSG1L|SHISA6|SHISA7	-2.4
GO Cellular Components	GO:0016607	nuclear speck	-4.9	APBB1|CLK2|DYRK1A|AFF2|GRK5|NR3C1|HSF4|IFI16|IL16|KIF22|MAPT|MBD1|AFDN|MOCS2|NFATC4|NR4A2|PPP1R8|RBBP6|SRSF2|SRSF5|SGK1|SNRNP70|SRPK2|TAP2|DDX39B|KAT6A|PABPN1|RBM10|PIP5K1A|PRPF18|STK19|PRPF4B|MBD4|PIAS2|SRSF11|TRIP12|RBM39|WTAP|HDAC4|DDX46|HDAC5|PQBP1|TENM1|ZBTB18|NXF1|DDX17|SRSF10|TCERG1|EHMT2|RNPS1|CPSF6|FAM107A|ZC3H13|PLCB1|FNBP4|SF3B1|SRRM2|BRD1|PRPF40B|CHTOP|AKAP8L|ZNF638|SCAPER|HP1BP3|WAC|…	-2.3
GO Cellular Components	GO:0032589	neuron projection membrane	-4.8	ADORA1|ATP2B1|ATP2B2|DAGLA|GABBR1|GABRA2|GABRA3|GABRA6|GABRG2|GRIA1|HPCA|KCNB1|MAPT|MPP2|SLC1A2|SGCE|EPB41L3|LAMP5|VEZT|PPP1R9B|UNC5A|SHISA6|SHISA7	-2.3
GO Cellular Components	GO:0098831	presynaptic active zone cytoplasmic component	-4.4	CTBP1|CTBP2|PPFIA3|RIMS2|RIMS3|UNC13B|RIMS1|UNC13A|ERC2|PCLO	-1.9
GO Cellular Components	GO:0043194	axon initial segment	-4.4	BIN1|ANK3|MAP1A|MAP2|NRCAM|SCN1A|CNTN2|NFASC|LRRC7|SPTBN4|TRIM46	-1.9
GO Cellular Components	GO:0120111	neuron projection cytoplasm	-4.2	KIF1A|CANX|AP3S1|DLG2|DLG4|FLOT2|FMR1|HNRNPAB|HPCA|KIF5A|MAP1A|MAP2|MAPT|OPA1|PAFAH1B1|SPAST|WASF1|AP3D1|PQBP1|AP3S2|TRAK1|RAB21|MAPK8IP3|FBXW11|BLOC1S6|CALY|TMEM108|TRIM46	-1.8
GO Cellular Components	GO:0033268	node of Ranvier	-4.2	BIN1|ANK3|DAG1|DLG1|SCN1A|SCN2A|CNTN2|NFASC|SPTBN4	-1.7
GO Cellular Components	GO:0070382	exocytic vesicle	-4.1	AMPH|BIN1|APBA1|APP|ATP2B1|ATP6V1B2|ATP6V1C1|DLG4|GABBR1|GABRA2|GRIA1|GRIN1|GRIN2A|SEPTIN5|PTPRN2|PTPRS|SLC6A9|SNAP25|SNCA|STX3|ABCC8|SYT1|SYT5|RNF112|PICALM|VAMP4|MTMR2|SYT7|SCAMP1|RAB3D|SNCAIP|SNAP91|SV2B|IQSEC1|DNM1L|UNC13B|RPH3A|UNC13A|NCSTN|BACE1|LAMP5|RAB26|TRAPPC4|SVOP|MFF|SLC17A7|RAB40C|MCTP1|PHAF1|KIRREL3|TRIM9|STXBP5|RAB15	-1.7
GO Cellular Components	GO:0030863	cortical cytoskeleton	-4.1	ACTN4|ACTN2|DBN1|DLG4|DMD|EPB41L2|FLOT2|LASP1|MOBP|PLS1|PRKCB|TMOD1|TRPC4|IQGAP1|RIMS2|RIMS3|FLOT1|RIMS1|CLASP1|MYRIP|NSMF|ERC2|PCLO|ANLN|PPP1R9A|LANCL2|SPTBN4|PPP1R9B|MYADM|MTSS2|MISP|SHROOM1	-1.7
GO Cellular Components	GO:0098936	intrinsic component of postsynaptic membrane	-3.6	ADORA1|ATP2B2|DAGLA|CANX|CDH10|CHRND|DLG4|GABBR1|GABRA2|GABRA3|GABRG2|GRIA1|GRID1|GRIK4|GRIK5|GRIN2A|GRM5|KCNA3|KCND3|NRCAM|NTRK3|PTPRS|SLC6A6|SLC6A9|CNTN2|PLPPR4|ADAM22|FXYD6|NLGN3|LRFN5|GSG1L|SHISA6|SHISA7	-1.2
GO Cellular Components	GO:0060076	excitatory synapse	-3.6	ADCY8|ATP2B2|ATP2B3|CALB2|DLG4|FGFR2|GRIA1|GRIA2|GRIA3|GRIN1|SLC6A9|SYT1|SYNJ1|SHANK1|NLGN3|SLC17A7|SHISA6|SHISA7	-1.2
GO Cellular Components	GO:0032590	dendrite membrane	-3.5	ATP2B1|ATP2B2|DAGLA|GABRA2|GABRA3|GABRA6|GABRG2|GRIA1|HPCA|KCNB1|MPP2|SGCE|LAMP5|PPP1R9B|SHISA6|SHISA7	-1.1
GO Cellular Components	GO:0099055	integral component of postsynaptic membrane	-3.3	ADORA1|ATP2B2|DAGLA|CANX|CDH10|CHRND|GABBR1|GABRA2|GABRA3|GABRG2|GRIA1|GRID1|GRIK4|GRIK5|GRIN2A|GRM5|KCNA3|KCND3|NRCAM|NTRK3|PTPRS|SLC6A6|SLC6A9|PLPPR4|ADAM22|FXYD6|NLGN3|LRFN5|GSG1L|SHISA6|SHISA7	-0.97
GO Cellular Components	GO:0099738	cell cortex region	-3.2	CTBP1|CTBP2|DCTN1|PRKCZ|PPFIA3|RIMS2|RIMS3|UNC13B|RIMS1|UNC13A|PHLDB1|CLASP1|ERC2|PCLO	-0.94
GO Cellular Components	GO:0099634	postsynaptic specialization membrane	-3.2	ATP2B2|DAGLA|CDH10|CHRND|DLG1|DLG2|DLG4|GABRA2|GABRA3|GABRG2|GRIA1|GRIA2|GRID1|GRIK5|GRIN2A|GRM1|GRM5|KCND3|NRCAM|PTPRS|LIN7A|PLPPR4|AKAP9|ADAM22|NLGN3|SYNJ2BP|LRFN5|GSG1L|SHISA6|SHISA7	-0.94
GO Cellular Components	GO:0016605	PML body	-3.2	ARNTL|ATR|ATRX|CHD3|DAPK3|NBN|SUMO2|SP3|TCF7L2|KAT6A|PIAS2|CALCOCO2|PARK7|WDFY3|AKAP8L|HIPK2|UBN1|TDP2|PIAS4|TENM2|SPTBN4|TP53INP2|SENP2|SMC6|MLIP|HIPK1|PATL1|NSMCE2	-0.94
GO Cellular Components	GO:0031209	SCAR complex	-3	WASF1|ABI1|ABI2|NCKAP1|WASF3|CYFIP2	-0.83
GO Cellular Components	GO:0043204	perikaryon	-3	APP|ASS1|ASTN1|CDK5|CLCN2|CTNND2|DLG2|DMWD|DRP2|ELAVL4|FMR1|GLUL|GRIK5|HPCA|KCNB1|KIF5A|PAM|PTPRS|SLC8A2|SLC8A3|RNF112|CPNE6|SIRT2|WDFY3|NCDN|ASTN2|BRD1|NSMF|TIAM2|SLC4A10|DIP2B|SHTN1|PALS1|KNDC1|AZIN2	-0.82
GO Cellular Components	GO:0099056	integral component of presynaptic membrane	-3	ADCY8|ADORA1|ATP2B1|ATP2B2|ATP2B3|ATP2B4|CANX|CDH10|GABBR1|GPM6A|GRIK4|GRIK5|KCNA3|PTPRD|SCN2A|SLC1A2|SLC6A9|SYT7|NCSTN|FXYD6	-0.81
GO Cellular Components	GO:1904115	axon cytoplasm	-2.9	KIF1A|AP3S1|DLG2|KIF5A|MAP1A|MAPT|OPA1|PAFAH1B1|SPAST|AP3D1|AP3S2|TRAK1|RAB21|MAPK8IP3|FBXW11|BLOC1S6|CALY|TMEM108|TRIM46	-0.71
GO Cellular Components	GO:0098982	GABA-ergic synapse	-2.8	ATP2B1|ATP2B2|ATP2B3|CDH10|CTBP1|CTBP2|DAG1|GABBR1|GABRA2|GABRA3|GABRG2|KCND3|SLC6A6|FLOT1|PLCB1|ERC2|PCLO|NLGN3|SLITRK2|LRFN5|IQSEC3	-0.69
GO Cellular Components	GO:0005905	clathrin-coated pit	-2.8	ADCY8|APP|ARRB2|AP2M1|CLTC|EPS15|LRP1|ITSN1|PICALM|NUMB|SYNJ1|AP1S2|SNAP91|DNM1L|TNK2|FNBP1|FCHO1|LRP12|ATAT1|SGIP1|REPS1	-0.69
GO Cellular Components	GO:1903293	phosphatase complex	-2.8	ITPR1|PPP1R12A|PPP1R3D|PPP2CB|PPP2R1B|PPP2R2B|PPP2R3A|PTPA|PPP2R5C|PPP3CB|TOX4|PDP1|PPP4R3B|PPP4R4|PPP1R9B|PPP1R3F|CNEP1R1	-0.68
GO Cellular Components	GO:0048788	cytoskeleton of presynaptic active zone	-2.8	RIMS2|RIMS3|RIMS1|ERC2|PCLO	-0.64
GO Cellular Components	GO:0098889	intrinsic component of presynaptic membrane	-2.8	ADCY8|ADORA1|ATP2B1|ATP2B2|ATP2B3|ATP2B4|CANX|CDH10|GABBR1|GPM6A|GRIK4|GRIK5|KCNA3|PTPRD|SCN2A|SLC1A2|SLC6A9|SYT7|NTNG1|NCSTN|FXYD6	-0.63
GO Cellular Components	GO:0099569	presynaptic cytoskeleton	-2.7	RIMS2|RIMS3|RIMS1|ERC2|PCLO|SEPTIN3	-0.6
GO Cellular Components	GO:0016281	eukaryotic translation initiation factor 4F complex	-2.7	EIF4A1|EIF4A2|EIF4B|EIF4G1|EIF4H|EIF4G3	-0.6
GO Cellular Components	GO:0000123	histone acetyltransferase complex	-2.6	HCFC1|MLLT1|ATXN7|TAF9|KAT6A|TRRAP|OGT|RUVBL1|KAT2B|PHF14|SUPT7L|BRD8|JADE2|BRD1|ZZZ3|EPC2|BRPF3|PHF20L1|PHF20|MBIP|SUPT20H|DMAP1|MEAF6|MSL1	-0.56
GO Cellular Components	GO:0008287	protein serine/threonine phosphatase complex	-2.6	ITPR1|PPP1R12A|PPP1R3D|PPP2CB|PPP2R1B|PPP2R2B|PPP2R3A|PTPA|PPP2R5C|PPP3CB|TOX4|PPP4R3B|PPP4R4|PPP1R9B|PPP1R3F|CNEP1R1	-0.53
GO Cellular Components	GO:0030672	synaptic vesicle membrane	-2.6	AMPH|BIN1|ATP2B1|ATP6V1B2|ATP6V1C1|GABRA2|GRIA1|PTPRN2|PTPRS|SLC6A9|SNCA|ABCC8|SYT1|SYT5|SYT7|SCAMP1|SV2B|DNM1L|UNC13B|RPH3A|UNC13A|LAMP5|RAB26|SVOP|SLC17A7|MCTP1|PHAF1	-0.51
GO Cellular Components	GO:0099501	exocytic vesicle membrane	-2.6	AMPH|BIN1|ATP2B1|ATP6V1B2|ATP6V1C1|GABRA2|GRIA1|PTPRN2|PTPRS|SLC6A9|SNCA|ABCC8|SYT1|SYT5|SYT7|SCAMP1|SV2B|DNM1L|UNC13B|RPH3A|UNC13A|LAMP5|RAB26|SVOP|SLC17A7|MCTP1|PHAF1	-0.51
GO Cellular Components	GO:0098878	neurotransmitter receptor complex	-2.6	DLG4|EPS8|GRIA1|GRIA2|GRIA3|GRIK4|GRIK5|GRIN1|GRIN2A|PORCN|GRIN3B|SHISA6|VWC2L|SHISA7	-0.51
GO Cellular Components	GO:0008328	ionotropic glutamate receptor complex	-2.6	DLG4|EPS8|GRIA1|GRIA2|GRIA3|GRIK4|GRIK5|GRIN1|GRIN2A|PORCN|GRIN3B|SHISA6|VWC2L|SHISA7	-0.51
GO Cellular Components	GO:0030864	cortical actin cytoskeleton	-2.5	ACTN4|ACTN2|DBN1|DMD|EPB41L2|FLOT2|LASP1|MOBP|PLS1|PRKCB|IQGAP1|FLOT1|MYRIP|ANLN|PPP1R9A|LANCL2|SPTBN4|PPP1R9B|MYADM|MTSS2|MISP|SHROOM1	-0.5
GO Cellular Components	GO:0005954	calcium- and calmodulin-dependent protein kinase complex	-2.5	CAMK2A|CAMK2B|CAMK2D|CAMK1G	-0.5
GO Cellular Components	GO:0099012	neuronal dense core vesicle membrane	-2.5	KIF1A|SYT5|CADPS|STXBP5	-0.5
GO Cellular Components	GO:0005912	adherens junction	-2.5	APC|ARVCF|CDH9|CDH10|CTNNA2|CTNND2|CXADR|DAG1|DLG1|DLG2|DLG4|FLOT2|JUP|KIFC3|AFDN|PTPRK|VEGFA|PKP4|LIN7A|DLG5|CYTH3|ABI2|TNK2|FLOT1|SORBS1|PARK7|SYNM|PIP5K1C|PRICKLE4|PDZD11|VEZT|AJAP1|PARD3|SPTBN4|PALS1|PPP1R9B|IGSF21|FRMD5|CCDC85A|SHROOM1|AJM1	-0.49
GO Cellular Components	GO:0098839	postsynaptic density membrane	-2.4	ATP2B2|DAGLA|DLG1|DLG2|DLG4|GRIA1|GRIA2|GRID1|GRIK5|GRIN2A|GRM1|GRM5|NRCAM|PTPRS|LIN7A|PLPPR4|AKAP9|ADAM22|SYNJ2BP|LRFN5|GSG1L|SHISA6|SHISA7	-0.42
GO Cellular Components	GO:0098948	intrinsic component of postsynaptic specialization membrane	-2.4	ATP2B2|CDH10|CHRND|DLG4|GABRA2|GABRA3|GABRG2|GRIA1|GRID1|GRIK5|GRIN2A|KCND3|NRCAM|PTPRS|PLPPR4|ADAM22|NLGN3|LRFN5|GSG1L|SHISA6|SHISA7	-0.42
GO Cellular Components	GO:0070776	MOZ/MORF histone acetyltransferase complex	-2.4	KAT6A|PHF14|BRD1|BRPF3|MEAF6	-0.41
GO Cellular Components	GO:0044307	dendritic branch	-2.4	MAP1A|MAP2|AKAP9	-0.41
GO Cellular Components	GO:0099060	integral component of postsynaptic specialization membrane	-2.3	ATP2B2|CDH10|CHRND|GABRA2|GABRA3|GABRG2|GRIA1|GRID1|GRIK5|GRIN2A|KCND3|NRCAM|PTPRS|PLPPR4|ADAM22|NLGN3|LRFN5|GSG1L|SHISA6|SHISA7	-0.34
GO Cellular Components	GO:0048787	presynaptic active zone membrane	-2.3	APBA1|ATP2B1|ATP2B2|ATP2B4|CANX|CDH10|GPM6A|STX3|STXBP1|NTNG1	-0.34
GO Cellular Components	GO:0098945	intrinsic component of presynaptic active zone membrane	-2.3	ATP2B1|ATP2B2|ATP2B4|CANX|CDH10|GPM6A|NTNG1	-0.33
GO Cellular Components	GO:0032591	dendritic spine membrane	-2.3	ATP2B1|ATP2B2|DAGLA|GRIA1|PPP1R9B|SHISA6|SHISA7	-0.33
GO Cellular Components	GO:0097440	apical dendrite	-2.3	CLU|MAP2|YKT6|CPEB3|NSMF|SLC4A10|SEZ6	-0.33
GO Cellular Components	GO:0043209	myelin sheath	-2.2	DLG1|GDI1|GLUL|MAG|MBP|PLEC|PLP1|PRKCZ|CNTN2|TUBB4A|SIRT2|PALS1|SERINC5	-0.28
GO Cellular Components	GO:0089717	spanning component of membrane	-2.2	SLC12A2|SLC4A4|SLC24A2|NLGN3|AJAP1|SLC24A3|TM2D3|SLC24A4	-0.27
GO Cellular Components	GO:0099059	integral component of presynaptic active zone membrane	-2.2	ATP2B1|ATP2B2|ATP2B4|CANX|CDH10|GPM6A	-0.26
GO Cellular Components	GO:0031045	dense core granule	-2.2	KIF1A|SLC6A9|SYT1|SYT5|CADPS|SYT7|VPS13A|MYRIP|STXBP5	-0.26
GO Cellular Components	GO:0098833	presynaptic endocytic zone	-2.1	DNM1|PICALM|SNAP91|PACSIN1	-0.24
GO Cellular Components	GO:0032127	dense core granule membrane	-2.1	KIF1A|SYT5|CADPS|STXBP5	-0.24
GO Cellular Components	GO:0070775	H3 histone acetyltransferase complex	-2.1	KAT6A|PHF14|BRD1|BRPF3|MEAF6	-0.24
GO Cellular Components	GO:0045293	mRNA editing complex	-2.1	HNRNPAB|WTAP|ZC3H13|METTL14|RBM15	-0.24
GO Cellular Components	GO:0044306	neuron projection terminus	-2.1	ADORA1|BIN1|CALB2|DLG4|DMD|FMR1|GLUL|GRIK5|GRIN1|KCNA3|NTRK2|OPHN1|PRKCB|PRKCG|PTPN9|SLC1A2|SLC8A2|SLC8A3|SNCA|SYT1|SYNJ1|AP3D1|TSPOAP1|UNC13B|SRSF10|UNC13A|PACSIN1|SLC4A10|DIXDC1	-0.24
GO Cellular Components	GO:0031248	protein acetyltransferase complex	-2.1	HCFC1|MLLT1|ATXN7|TAF9|KAT6A|TRRAP|OGT|RUVBL1|KAT2B|PHF14|SUPT7L|BRD8|JADE2|BRD1|ZZZ3|EPC2|BRPF3|PHF20L1|PHF20|MBIP|SUPT20H|DMAP1|MEAF6|MSL1	-0.22
GO Cellular Components	GO:1902493	acetyltransferase complex	-2.1	HCFC1|MLLT1|ATXN7|TAF9|KAT6A|TRRAP|OGT|RUVBL1|KAT2B|PHF14|SUPT7L|BRD8|JADE2|BRD1|ZZZ3|EPC2|BRPF3|PHF20L1|PHF20|MBIP|SUPT20H|DMAP1|MEAF6|MSL1	-0.22
GO Cellular Components	GO:0071004	U2-type prespliceosome	-2.1	SNRNP70|SNRPN|SF3B1|PRPF40B|LUC7L3|PRPF39|LUC7L	-0.22
GO Cellular Components	GO:0071010	prespliceosome	-2.1	SNRNP70|SNRPN|SF3B1|PRPF40B|LUC7L3|PRPF39|LUC7L	-0.22
GO Cellular Components	GO:1902562	H4 histone acetyltransferase complex	-2.1	HCFC1|MLLT1|TRRAP|OGT|RUVBL1|BRD8|EPC2|PHF20L1|PHF20|DMAP1|MEAF6|MSL1	-0.22
GO Molecular Functions	GO:0008066	glutamate receptor activity	-5.5	GRIA1|GRIA2|GRIA3|GRID1|GRIK1|GRIK4|GRIK5|GRIN1|GRIN2A|GRM1|GRM4|GRM5|GRM7|GRM8|GRIN3B	-2.9
GO Molecular Functions	GO:0005516	calmodulin binding	-4	ADCY8|ATP2B1|ATP2B2|ATP2B3|ATP2B4|CAMK4|CAMK2A|CAMK2B|CAMK2D|DAPK1|GRIN1|KCNN1|KCNN2|MAP2|MBP|MYO1B|MYH10|MYO9B|NRGN|PDE1C|PHKB|PHKG2|PPP3CB|RASGRF2|RYR1|SLC8A2|SLC8A3|SNTB2|STRN|SYT1|CAMK1|MKNK1|CASK|IQGAP1|SYT7|IQCB1|UNC13B|ARPP21|UNC13A|PLCB1|FBXL2|NDUFAF4|MYO3A|CAMK1G|MYH14|ITPKC|SLC24A4	-1.6
GO Molecular Functions	GO:0048156	tau protein binding	-3.9	BIN1|CDK5|CLU|DCTN1|DYRK1A|MARK2|FYN|GSK3B|SMAD2|MAP1A|MAP2|MARK3|PPP2CB|ROCK1|SNCA|PICALM|TTBK2	-1.5
GO Molecular Functions	GO:0003729	mRNA binding	-3.7	ADARB1|AUH|DHX9|EIF4A1|EIF4G1|ELAVL4|FMR1|HDLBP|HNRNPA2B1|HNRNPAB|HNRNPC|HNRNPD|HNRNPK|ILF3|MYH10|HNRNPM|PCBP2|PKM|PPP1R8|RPS2|SRSF5|SNRNP70|SUPT5H|CNBP|DENR|EIF4G3|FUBP3|QKI|RIDA|NXF1|KHDRBS3|CELF1|CELF2|RNPS1|CPSF6|PARK7|CPEB3|PUM2|SF3B1|SRRM2|RBFOX2|ZNF385A|LSM14A|CHTOP|DAZAP1|RBMS3|LUC7L3|RBFOX1|SAMD4B|LUC7L|CELF4|PCBP4|METTL14|PTBP2|EEFSEC|CELF5|CPEB1|RBM15|TUT1|HNRNPLL|RBFOX3|LSM14B|RBM24|Y…	-1.3
GO Molecular Functions	GO:0051010	microtubule plus-end binding	-3.6	APC|DCTN1|PAFAH1B1|STIM1|CLIP2|MAPRE2|FBXW11|CLASP1|CLIP3|TTBK2	-1.2
GO Molecular Functions	GO:0004970	ionotropic glutamate receptor activity	-3.6	GRIA1|GRIA2|GRIA3|GRID1|GRIK1|GRIK4|GRIK5|GRIN1|GRIN2A|GRIN3B	-1.2
GO Molecular Functions	GO:0031267	small GTPase binding	-3.5	DAPK3|DOCK3|DVL1|EPS8|GAS8|GDI1|TNPO1|AFDN|MYO9B|PAK3|RAP1GAP|ROCK1|SORL1|TSC2|EVI5|LZTR1|PICALM|IQGAP1|STK19|WASF1|RIMS2|USP6NL|RIMS3|GOLGA5|RANBP9|DNM1L|ABI2|RNF41|UNC13B|NCKAP1|XPOT|PPP6R1|RPH3A|RIMS1|MYCBP2|XPO6|SRGAP2|RABGAP1|ARFIP2|MYRIP|CYFIP2|RABGEF1|PEX5L|CYRIB|YIPF1|EXOC2|FGD6|CDC42SE2|MICAL3|RIC1|ALS2|RBSN|INF2|MAPKAP1|IPO4|CYRIA|IFT20|MTSS2|FMNL2|SGSM1|DENND10	-1.1
GO Molecular Functions	GO:0017124	SH3 domain binding	-3.2	DOCK3|DTX1|EPS15|GRIK5|MAPT|PAK3|SH3BGRL|ADAM17|SYNJ1|QKI|SH3BP5|BCAR1|DNAJC6|ELMO1|ABI1|ABI2|KHDRBS3|CIT|INPP5J|SH3KBP1|SOCS7|SHANK1|RUFY2|ENAH|AFAP1|ELMO2|ZNF106|SGIP1|REPS1|SHANK3|MAPK15|WIPF3	-0.94
GO Molecular Functions	GO:0042393	histone binding	-3.2	APBB1|ATRX|CHD2|CHD3|PHC1|PHC2|BPTF|FMR1|MSH6|MLLT1|MLLT6|NAP1L4|PHF1|PRKCB|PTMS|RBBP5|RBBP7|DPF2|SMARCA4|SNCA|SUPT6H|TP53BP1|KAT6A|MLLT10|DPF1|CHAF1B|KDM4A|USP15|USP16|ZMYND11|SPIN1|SCMH1|WDTC1|ZZEF1|BRD4|BRD1|ZZZ3|NOC2L|PRMT7|PIH1D1|WRAP53|CHD7|KMT2E|KMT2C|MORC4|TBL1XR1|KDM8|PHC3|CHD6|PHF6|GLYR1|KMT5C|UHRF2|CDYL2	-0.92
GO Molecular Functions	GO:0050321	tau-protein kinase activity	-3.1	CDK5|DYRK1A|MARK2|FYN|GSK3B|MARK3|PHKG2|ROCK1|SIK3|TTBK2	-0.89
GO Molecular Functions	GO:0008195	phosphatidate phosphatase activity	-3	PLPP1|PLPPR4|PLPPR1|PLPPR2|PLPPR3|PLPPR5|PLPP4	-0.79
GO Molecular Functions	GO:0019213	deacetylase activity	-2.7	HDAC3|NDST3|PIGL|HDAC4|HDAC5|SIRT2|SIRT5|MACROD1|AMDHD2|MIER2|NDST4|HDAC11|OARD1	-0.59
GO Molecular Functions	GO:0008093	cytoskeletal anchor activity	-2.7	ANK2|ANK3|JUP|MAP1A|SORBS2|ABI2|EPB41L3|OBSL1|SPTBN4	-0.58
GO Molecular Functions	GO:0035255	ionotropic glutamate receptor binding	-2.7	CANX|DLG4|GNAS|OPHN1|FLOT1|SHANK1|SHANK3|SHISA6|SHISA7	-0.58
GO Molecular Functions	GO:0097109	neuroligin family protein binding	-2.5	DLG4|NRXN3|NRXN1|NRXN2	-0.5
GO Molecular Functions	GO:0001163	RNA polymerase I transcription regulatory region sequence-specific DNA binding	-2.4	SMARCA4|UBTF|TAF1C|TAF1B|PIH1D1	-0.41
GO Molecular Functions	GO:0030548	acetylcholine receptor regulator activity	-2.4	CDK5|FNTA|LY6E|LY6H|LYNX1	-0.41
GO Molecular Functions	GO:0099602	neurotransmitter receptor regulator activity	-2.4	CDK5|FNTA|LY6E|LY6H|LYNX1	-0.41
GO Molecular Functions	GO:0001164	RNA polymerase I core promoter sequence-specific DNA binding	-2.4	SMARCA4|UBTF|TAF1C|TAF1B|PIH1D1	-0.41
GO Molecular Functions	GO:0022835	transmitter-gated channel activity	-2.4	CHRND|GABRA2|GABRA3|GABRA6|GABRG2|GLRA2|GRIA1|GRIA2|GRIA3|GRID1|GRIK1|GRIK4|GRIK5|GRIN1|GRIN2A|GRIN3B	-0.41
GO Molecular Functions	GO:0022824	transmitter-gated ion channel activity	-2.4	CHRND|GABRA2|GABRA3|GABRA6|GABRG2|GLRA2|GRIA1|GRIA2|GRIA3|GRID1|GRIK1|GRIK4|GRIK5|GRIN1|GRIN2A|GRIN3B	-0.41
GO Molecular Functions	GO:1905056	P-type calcium transporter activity involved in regulation of presynaptic cytosolic calcium ion concentration	-2.4	ATP2B1|ATP2B2|ATP2B3	-0.41
GO Molecular Functions	GO:0099583	neurotransmitter receptor activity involved in regulation of postsynaptic cytosolic calcium ion concentration	-2.4	GRIA1|GRM1|GRM5	-0.41
GO Molecular Functions	GO:0106006	cytoskeletal protein-membrane anchor activity	-2.4	JUP|EPB41L3|SPTBN4	-0.41
GO Molecular Functions	GO:0019894	kinesin binding	-2.4	DLG4|KIF5A|KLC1|SNCA|SPAG9|ARHGEF10|MAPK8IP3|PLEKHM2|MAPK8IP2|TOR1B|AP1AR|SHTN1|KLC2|KLC4|TTBK2	-0.4
GO Molecular Functions	GO:0001540	amyloid-beta binding	-2.2	ACHE|APBA1|APBB1|APBB2|CACNA1B|SCARB1|CLU|GRIA1|GRIA2|GRIA3|GRIN1|GRIN2A|ITGB2|LRP1|PFDN1|SORL1|PICALM|APBB3|MAPK8IP2|BACE1|TM2D1	-0.27
GO Molecular Functions	GO:0042577	lipid phosphatase activity	-2.2	PLPP1|PLPPR4|PLPPR1|PLPPR2|PLPPR3|PLPPR5	-0.26
GO Molecular Functions	GO:0017166	vinculin binding	-2.2	DAG1|DMD|PXN|SORBS3|CORO2B|SYNM	-0.26
GO Molecular Functions	GO:0004683	calmodulin-dependent protein kinase activity	-2.2	CAMK4|CAMK2A|CAMK2B|CAMK2D|DAPK1|PHKG2|CAMK1|MKNK1|CAMK1G	-0.26
GO Molecular Functions	GO:0003836	beta-galactoside (CMP) alpha-2,3-sialyltransferase activity	-2.1	ST3GAL1|ST3GAL4|ST3GAL3|ST3GAL5	-0.24
GO Molecular Functions	GO:0033130	acetylcholine receptor binding	-2.1	DLG4|LY6E|LY6H|NRXN1|LYNX1	-0.24
GO Molecular Functions	GO:0005432	calcium:sodium antiporter activity	-2.1	SLC8A2|SLC8A3|SLC24A2|SLC24A3|SLC24A4	-0.24
GO Molecular Functions	GO:0098988	G protein-coupled glutamate receptor activity	-2.1	GRM1|GRM4|GRM5|GRM7|GRM8	-0.24
GO Molecular Functions	GO:0001640	adenylate cyclase inhibiting G protein-coupled glutamate receptor activity	-2.1	GRM1|GRM4|GRM5|GRM7|GRM8	-0.24
GO Molecular Functions	GO:0008432	JUN kinase binding	-2.1	PTK2|SPAG9|MAD2L2|RNF13|MAPK8IP3	-0.24
GO Molecular Functions	GO:0008013	beta-catenin binding	-2.1	APC|CTNNA2|CTNND2|CXADR|DVL1|GSK3B|NR4A2|PTPRK|PXN|SALL1|TCF7L2|TRPC4|NUMB|BTRC|DLG5|MED12|APC2|PTPRT|AJAP1|TBL1XR1|LZIC|BCL9L	-0.24
GO Molecular Functions	GO:1904047	S-adenosyl-L-methionine binding	-2.1	CBS|KMT5B|PRMT8|SUV39H2|SETD6|KMT5C|BMT2	-0.22
GO Molecular Functions	GO:0019208	phosphatase regulator activity	-2.1	MGAT5|PPP1R12A|PPP1R1A|PPP1R7|PPP1R8|PPP2R1B|PPP2R2B|PPP2R3A|PTPA|PPP2R5C|SBF1|PPP1R11|PPP6R2|RCAN3|PPP6R1|CABIN1|PPP1R12C|PPP6R3|PPP4R3B|PPP4R4|SBF2|PPP1R1B|PPP1R9B|BOD1|ELFN2	-0.22
GO Molecular Functions	GO:0030594	neurotransmitter receptor activity	-2.1	ADORA1|CHRND|GABBR1|GABRA2|GABRA3|GABRA6|GABRG2|GLRA2|GRIA1|GRIA2|GRIA3|GRID1|GRIK1|GRIK4|GRIK5|GRIN1|GRIN2A|GRM1|GRM5|HTR4|GRIN3B	-0.2
GO Molecular Functions	GO:0022839	ion gated channel activity	-2.1	KCNMA1|KCNN1|KCNN2|PKD2L1|TMEM63B|TMEM63C|TTYH1|KCNT1|ANO4|ANO5|KCNT2	-0.2
GO Molecular Functions	GO:1990381	ubiquitin-specific protease binding	-2	AMFR|CLTC|VCP|BAG6|PARK7|CHMP3|SYVN1|LCOR	-0.19
GO Molecular Functions	GO:0046966	nuclear thyroid hormone receptor binding	-2	MED1|NCOA3|TRIP12|HMGN3|ZNHIT3|MED12|MED13|BRD8|NCOA6|JMJD1C	-0.19
KEGG Pathway	hsa04724	Glutamatergic synapse	-5.3	ADCY2|ADCY8|DLG4|GLUL|GNAI2|GNAS|GNB1|GRIA1|GRIA2|GRIA3|GRIK1|GRIK4|GRIK5|GRIN1|GRIN2A|GRM1|GRM4|GRM5|GRM7|GRM8|ITPR1|PLCB4|PLD2|PPP3CB|PRKACB|PRKCB|PRKCG|MAPK3|SLC1A2|DLGAP1|PLCB1|SHANK1|SLC17A7|SHANK3|GRIN3B	-2.8
KEGG Pathway	hsa04728	Dopaminergic synapse	-4.3	AKT2|BMAL1|ARRB2|CACNA1B|CAMK2A|CAMK2B|CAMK2D|ATF6B|GNAI2|GNAS|GNB1|GRIA1|GRIA2|GRIA3|GRIN2A|GSK3B|ITPR1|KCNJ6|KIF5A|PLCB4|PPP2CB|PPP2R1B|PPP2R2B|PPP2R3A|PPP2R5C|PPP3CB|PRKACB|PRKCB|PRKCG|MAPK11|MAPK10|SCN1A|AKT3|PLCB1|CALY|PPP1R1B	-2
KEGG Pathway	hsa04720	Long-term potentiation	-3.7	ADCY8|CAMK4|CAMK2A|CAMK2B|CAMK2D|GRIA1|GRIA2|GRIN1|GRIN2A|GRM1|GRM5|ITPR1|KRAS|PLCB4|PPP1R1A|PPP3CB|PRKACB|PRKCB|PRKCG|MAPK3|PLCB1	-1.6
KEGG Pathway	hsa04925	Aldosterone synthesis and secretion	-3.4	ADCY2|ADCY8|ATF1|ATP1B3|ATP2B1|ATP2B2|ATP2B3|ATP2B4|DAGLA|CAMK4|CAMK2A|CAMK2B|CAMK2D|SCARB1|ATF6B|GNAS|ITPR1|NR4A2|PLCB4|PRKACB|PRKCB|PRKCG|CAMK1|CACNA1G|PLCB1|CAMK1G	-1.4
KEGG Pathway	hsa04144	Endocytosis	-3	AMPH|BIN1|RHOA|ARRB2|AP2M1|CLTC|DNM1|EPS15|FGFR2|GRK4|GRK5|KIF5A|SMAD2|MDM2|NEDD4|PLD2|PRKCZ|PSD|RAB5C|SH3GL2|SNX2|SRC|TGFBR1|PIP5K1A|SNX3|RABEP1|CYTH3|ZFYVE16|DNAJC6|WASHC5|IQSEC1|RNF41|ARPC1A|STAMBP|RAB31|NEDD4L|PIP5K1C|ACAP2|SH3KBP1|WASHC3|CHMP3|RUFY2|ARFGAP1|PARD3|SH3GLB2|ACTR3B|RBSN|MVB12B|ACAP3|AGAP1|AGAP3|IQSEC3|WIPF3	-1.2
KEGG Pathway	hsa04961	Endocrine and other factor-regulated calcium reabsorption	-2.7	ATP1B3|ATP2B1|ATP2B2|ATP2B3|ATP2B4|AP2M1|CLTC|DNM1|GNAS|PLCB4|PRKACB|PRKCB|PRKCG|SLC8A2|SLC8A3|PLCB1	-0.98
KEGG Pathway	hsa05231	Choline metabolism in cancer	-2.7	AKT2|CHKA|CHKB|DGKG|KRAS|PLD2|PRKCB|PRKCG|MAPK3|MAPK10|RALGDS|RHEB|RPS6KB2|SLC22A5|TSC2|PIP5K1A|PLPP1|WASF1|PCYT1B|AKT3|WASF3|PIP5K1C|SLC44A1|CHPT1|SLC44A2	-0.98
KEGG Pathway	hsa04360	Axon guidance	-2.6	RHOA|CAMK2A|CAMK2B|CAMK2D|CDK5|EPHA5|EPHB1|EPHB3|EPHB6|FYN|GNAI2|GSK3B|ILK|KRAS|L1CAM|ABLIM1|NEO1|NFATC4|PAK3|PLXNB1|PPP3CB|PRKCZ|MAPK3|PTCH1|PTK2|RGS3|ROCK1|SRC|TRPC4|SLIT2|PLXNC1|NTNG1|ABLIM3|ARHGEF12|SRGAP2|SSH3|ENAH|PARD3|PAK5|SEMA6D|UNC5A|UNC5D	-0.97
KEGG Pathway	hsa04730	Long-term depression	-2.3	CRHR1|GNAI2|GNAS|GRIA1|GRIA2|GRIA3|GRM1|ITPR1|KRAS|PLCB4|PPP2CB|PPP2R1B|PRKCB|PRKCG|MAPK3|RYR1|PLCB1	-0.81
KEGG Pathway	hsa04929	GnRH secretion	-2.3	AKT2|ARRB2|GABBR1|ITPR1|KCNJ6|KCNN1|KCNN2|KRAS|PLCB4|PRKCB|PRKCG|MAPK3|TRPC4|CACNA1G|GABBR2|AKT3|PLCB1	-0.81
KEGG Pathway	hsa04721	Synaptic vesicle cycle	-2.2	ATP6V1B2|ATP6V1C1|ATP6V0B|CACNA1B|AP2M1|CLTC|DNM1|SLC1A2|SLC6A7|SLC6A9|SNAP25|STX3|STXBP1|SYT1|UNC13B|RIMS1|UNC13A|ATP6V1D|ATP6V1H|SLC17A7	-0.81
KEGG Pathway	hsa04723	Retrograde endocannabinoid signaling	-2.2	ADCY2|ADCY8|DAGLA|CACNA1B|FAAH|GABRA2|GABRA3|GABRA6|GABRG2|GNAI2|GNB1|GRIA1|GRIA2|GRIA3|GRM1|GRM5|ITPR1|KCNJ6|NDUFB6|NDUFS6|NDUFV3|PLCB4|PRKACB|PRKCB|PRKCG|MAPK3|MAPK11|MAPK10|MGLL|RIMS1|PLCB1|SLC17A7|NDUFA11	-0.81
KEGG Pathway	hsa05017	Spinocerebellar ataxia	-2.2	AKT2|DAB1|GRIA1|GRIA2|GRIA3|GRIN1|GRIN2A|GRM1|RBPJ|ITPR1|KCND3|OPA1|PLCB4|PRKCB|PRKCG|MAPK10|PSMA2|PSMB1|PSMB3|PSMB7|RYR1|ATXN2|VDAC1|AKT3|NOP56|CIC|PLCB1|PUM2|CYCS|ATG2B|GRIN3B|BEAN1|ATXN1L	-0.81
KEGG Pathway	hsa04261	Adrenergic signaling in cardiomyocytes	-2.2	ADCY2|ADCY8|AKT2|ATP1B3|ATP2B1|ATP2B2|ATP2B3|ATP2B4|CACNA2D1|CACNB4|CAMK2A|CAMK2B|CAMK2D|ATF6B|GNAI2|GNAS|PLCB4|PPP1R1A|PPP2CB|PPP2R1B|PPP2R2B|PPP2R3A|PPP2R5C|PRKACB|MAPK3|MAPK11|SLC8A2|SLC8A3|TPM2|TPM3|CACNA2D2|AKT3|PLCB1|CACNA2D3	-0.81
KEGG Pathway	hsa04911	Insulin secretion	-2.1	ADCY2|ADCY8|ATP1B3|CAMK2A|CAMK2B|CAMK2D|ATF6B|GNAS|KCNMA1|KCNN1|KCNN2|PLCB4|PRKACB|PRKCB|PRKCG|SNAP25|ABCC8|RIMS2|PLCB1|PCLO	-0.78
KEGG Pathway	hsa04919	Thyroid hormone signaling pathway	-2.1	AKT2|ATP1B3|DIO2|GSK3B|KRAS|MDM2|PFKL|PFKM|PLCB4|MED1|PRKACB|PRKCB|PRKCG|MAPK3|RHEB|SRC|THRA|TSC2|NCOA3|NCOA1|HDAC3|KAT2B|MED14|MED27|TBC1D4|MED12|MED13|AKT3|PLCB1	-0.74
KEGG Pathway	hsa04713	Circadian entrainment	-2	ADCY2|ADCY8|CAMK2A|CAMK2B|CAMK2D|GNAI2|GNAS|GNB1|GRIA1|GRIA2|GRIA3|GRIN1|GRIN2A|ITPR1|KCNJ6|PLCB4|PRKACB|PRKCB|PRKCG|MAPK3|RYR1|CACNA1G|PLCB1	-0.74
KEGG Pathway	hsa04972	Pancreatic secretion	-2	ADCY2|ADCY8|AMY2A|RHOA|ATP1B3|ATP2B1|ATP2B2|ATP2B3|ATP2B4|GNAS|ITPR1|KCNMA1|PLCB4|PRKCB|PRKCG|SLC12A2|SLC4A4|RAB3D|PLCB1|TPCN2	-0.74
KEGG Pathway	hsa05031	Amphetamine addiction	-2	CAMK4|CAMK2A|CAMK2B|CAMK2D|ATF6B|GNAS|GRIA1|GRIA2|GRIA3|GRIN1|GRIN2A|PPP3CB|PRKACB|PRKCB|PRKCG|PPP1R1B|GRIN3B	-0.74

## Sheet: liver_DSGs_1027
Category	GO	Description	LogP	Hits	Log(q-value)
GO Biological Processes	GO:0044282	small molecule catabolic process	-16	ACADVL|ACOX1|ADH4|AGXT|APOE|ARG1|ASPA|KYAT1|SCARB1|CDO1|CYP1A1|DPYD|ESD|GCDH|GCSH|GK|GLUD1|GPT|GSTZ1|HAGH|HAL|HNMT|HPD|HSD17B4|CYP4F3|MGAT1|MTRR|PNP|OTC|PAH|PHYH|PON1|SCP2|SORD|SULT1E1|SULT1A1|TAT|TDO2|ACOX2|KMO|ALDH4A1|KYNU|ENTPD4|AASS|RIDA|ECI2|MTHFS|ALDH1L1|FTCD|PARK7|HAAO|DECR2|GLS2|PIPOX|SCLY|ECHDC2|BDH2|AGXT2|ACAD11|AFMID|GALM|AMDHD1|UPP2|LDHD|GK5|NUDT7	-11
GO Biological Processes	GO:0016054	organic acid catabolic process	-13	ACADVL|ACOX1|AGXT|ARG1|ASPA|KYAT1|CDO1|GCDH|GCSH|GLUD1|GPT|GSTZ1|HAL|HNMT|HPD|HSD17B4|CYP4F3|MTRR|OTC|PAH|PHYH|PON1|SCP2|TAT|TDO2|ACOX2|KMO|ALDH4A1|KYNU|AASS|RIDA|ECI2|MTHFS|ALDH1L1|FTCD|HAAO|DECR2|GLS2|PIPOX|SCLY|ECHDC2|BDH2|AGXT2|ACAD11|AFMID|AMDHD1|LDHD|NUDT7	-9.1
GO Biological Processes	GO:0046395	carboxylic acid catabolic process	-13	ACADVL|ACOX1|AGXT|ARG1|ASPA|KYAT1|CDO1|GCDH|GCSH|GLUD1|GPT|GSTZ1|HAL|HNMT|HPD|HSD17B4|CYP4F3|MTRR|OTC|PAH|PHYH|PON1|SCP2|TAT|TDO2|ACOX2|KMO|ALDH4A1|KYNU|AASS|RIDA|ECI2|MTHFS|ALDH1L1|FTCD|HAAO|DECR2|GLS2|PIPOX|ECHDC2|BDH2|AGXT2|ACAD11|AFMID|AMDHD1|LDHD|NUDT7	-9
GO Biological Processes	GO:1901605	alpha-amino acid metabolic process	-11	AGXT|ARG1|ASL|ASPA|ASS1|BHMT|KYAT1|CDO1|CPS1|GCDH|GCSH|GGT1|GLUD1|GPT|GSTZ1|HAL|HNF4A|HPD|MTRR|OTC|PAH|TAT|TDO2|KMO|ALDH4A1|KYNU|AASS|RIDA|MTHFS|FTCD|SEPHS1|HAAO|BHMT2|GLS2|GNMT|PIPOX|SCLY|NIT2|AGXT2|AFMID|AMDHD1|ASPG	-7.8
GO Biological Processes	GO:0032787	monocarboxylic acid metabolic process	-11	ACADVL|ACOX1|ADH4|ADH6|AGXT|ALDH1A1|C3|CBR1|CD36|CD74|MAPK14|CYP1A1|CYP1A2|CYP2C18|ACSL1|ACSL4|NR5A2|GAMT|GCDH|GGT1|GPX4|GSTM1|HAGH|HAL|HPGD|HSD17B4|IGF1|LIPC|CYP4F3|PAM|PFKFB1|PHYH|POR|PPARA|SCP2|XBP1|ACOX2|KMO|KYNU|FADS2|QKI|NR1H4|ECI2|MTHFS|FTCD|PARK7|HAAO|DECR2|ANGPTL3|PLA2G3|CRYL1|ABHD5|UGT1A6|ACSM5|ECHDC2|OGDHL|BDH2|AGXT2|ACBD4|HSD3B7|HYI|ADPGK|ACAD11|OSBPL1A|OSBPL9|AMDHD1|LDHD|NUDT7	-7.8
GO Biological Processes	GO:0043484	regulation of RNA splicing	-10	CLK1|CLK2|DDX5|FMR1|HNRNPA1|HNRNPA2B1|HNRNPH3|PTBP1|ATXN7|SRSF5|SRSF6|SFSWAP|SNRNP70|TAF9|TAF10|FXR1|AKAP17A|KAT2B|ZPR1|QKI|RBM39|WTAP|THRAP3|PTBP3|RBM12|RBM5|CELF1|RNPS1|DAZAP1|SMU1|SUPT20H|MBNL3|ENY2|PCBP4|CLK4|PTBP2|CCNL2|TADA2B	-6.7
GO Biological Processes	GO:0009063	cellular amino acid catabolic process	-10	AGXT|ARG1|ASPA|KYAT1|CDO1|GCSH|GLUD1|GPT|GSTZ1|HAL|HNMT|HPD|MTRR|OTC|PAH|TAT|TDO2|KMO|ALDH4A1|KYNU|AASS|RIDA|FTCD|HAAO|GLS2|PIPOX|AGXT2|AFMID|AMDHD1	-6.7
GO Biological Processes	GO:1901606	alpha-amino acid catabolic process	-9.8	AGXT|ARG1|ASPA|KYAT1|CDO1|GCSH|GLUD1|GPT|GSTZ1|HPD|MTRR|OTC|PAH|TAT|TDO2|KMO|ALDH4A1|KYNU|AASS|RIDA|HAAO|GLS2|PIPOX|SCLY|AGXT2|AFMID	-6.5
GO Biological Processes	GO:0006397	mRNA processing	-9.7	DDX5|DHX9|FMR1|FRG1|HNRNPA1|HNRNPA2B1|HNRNPC|HNRNPH3|HNRNPM|NONO|PTBP1|SRSF5|SRSF6|SFSWAP|SNRNP70|SNRPC|SUPT6H|AKAP17A|THOC5|ZPR1|SRSF11|QKI|RBM39|WTAP|DHX38|DDX46|THRAP3|PTBP3|RBM5|ALYREF|CELF1|TXNL4A|PAPOLA|RNPS1|CLASRP|XRN2|RALY|KIN|SF3B1|SRRM2|AKAP8L|TRUB2|A1CF|ARL6IP4|LUC7L2|LUC7L3|AURKAIP1|PRPF39|PRPF38B|SMU1|PRPF40A|LUC7L|MBNL3|PTBP2|FASTKD5|RBM26|TENT4B|TSEN34|ZCRB1|PPP4R2|HNRNPA3|CNOT6L|…	-6.4
GO Biological Processes	GO:0016071	mRNA metabolic process	-8.7	DDX5|DHX9|FMR1|FRG1|HNRNPA1|HNRNPA2B1|HNRNPC|HNRNPH3|EIF3E|HNRNPM|NONO|PCBP2|POLR2I|PTBP1|RNASE4|RNH1|SRSF5|SRSF6|SFSWAP|SNRNP70|SNRPC|SUPT6H|TAF9|TAF10|AKAP17A|THOC5|ZPR1|SRSF11|QKI|RBM39|WTAP|DHX38|DDX46|THRAP3|PTBP3|RBM5|ALYREF|RIDA|NCOA2|CELF1|TXNL4A|PAPOLA|RNPS1|CLASRP|XRN2|RALY|KIN|SF3B1|SRRM2|AKAP8L|TRUB2|SND1|A1CF|ARL6IP4|LUC7L2|LUC7L3|AURKAIP1|PRPF39|PRPF38B|SMU1|PRPF40A|LUC7L|MBNL3|DCP1…	-5.5
GO Biological Processes	GO:0008380	RNA splicing	-8.5	DDX5|DHX9|FMR1|FRG1|HNRNPA1|HNRNPA2B1|HNRNPC|HNRNPH3|HNRNPM|NONO|PTBP1|SRSF5|SRSF6|SFSWAP|SNRNP70|SNRPC|SUPT6H|AKAP17A|THOC5|ZPR1|SRSF11|QKI|RBM39|WTAP|DHX38|DDX46|THRAP3|PTBP3|RBM5|ALYREF|CELF1|TXNL4A|RNPS1|CLASRP|RALY|SF3B1|SRRM2|AKAP8L|ARL6IP4|LUC7L2|LUC7L3|PRPF39|PRPF38B|SMU1|PRPF40A|LUC7L|MBNL3|PTBP2|TSEN34|ZCRB1|PPP4R2|HNRNPA3|TSEN54	-5.3
GO Biological Processes	GO:0015748	organophosphate ester transport	-7.9	APOA1|APOC1|APOC3|APOE|SCARB1|CD47|SLC29A1|SLC37A4|MTTP|ABCB4|SCP2|SLC19A1|C2CD2L|ABCC5|PRELID3A|ATP11A|PRELID3B|LRRC8A|PITPNM2|ABCG8|SLC25A32|MFSD2A|OSBPL5|OSBPL10|ATP8B3|ATP11C|ATP9B|TMEM41B	-4.8
GO Biological Processes	GO:0006956	complement activation	-7.7	CFB|C3|C4A|C4BPA|C5|C6|C8B|C9|CLU|CFH|CFI|MBL2|MASP1|MASP2|C1RL|COLEC11	-4.6
GO Biological Processes	GO:0044283	small molecule biosynthetic process	-7.7	ADK|AGXT|ALDH1A1|APOA1|ASL|ASS1|BHMT|CBR1|CD74|CDO1|CPS1|CYP1A1|CYP1A2|DPYD|FBP1|FDPS|SLC37A4|GAMT|GCH1|GGT1|GLUD1|GPX4|GSTM1|LIPC|MTRR|NDUFA9|PNP|NT5E|OTC|PAH|PFKFB1|RBP4|SCP2|SORD|TK2|UGDH|XBP1|KMO|KYNU|FADS2|QKI|AASS|PARK7|SEPHS1|PPIP5K2|HAAO|SLC39A14|BHMT2|DECR2|GLS2|IP6K2|ACSM5|AGXT2|HSD3B7|OSBPL1A|OSBPL9	-4.6
GO Biological Processes	GO:0006520	cellular amino acid metabolic process	-7.6	AGXT|ALDH1A1|ARG1|ASL|ASPA|ASS1|BHMT|KYAT1|CDO1|CPS1|DPYD|GCDH|GCSH|GGT1|GLUD1|GPT|GSTZ1|HAL|HNF4A|HNMT|HPD|MTRR|OTC|PAH|TAT|TDO2|KMO|ALDH4A1|KYNU|AASS|RIDA|MTHFS|FTCD|SEPHS1|HAAO|BHMT2|GLS2|GNMT|PIPOX|SCLY|NIT2|AGXT2|AFMID|AMDHD1|ASPG	-4.5
GO Biological Processes	GO:0016053	organic acid biosynthetic process	-7.6	AGXT|ALDH1A1|ASL|ASS1|BHMT|CBR1|CD74|CDO1|CPS1|CYP1A1|CYP1A2|DPYD|GAMT|GGT1|GLUD1|GPX4|GSTM1|LIPC|MTRR|OTC|PAH|SCP2|UGDH|XBP1|KMO|KYNU|FADS2|QKI|AASS|PARK7|SEPHS1|HAAO|BHMT2|DECR2|GLS2|ACSM5|AGXT2|HSD3B7|OSBPL1A|OSBPL9	-4.5
GO Biological Processes	GO:0030163	protein catabolic process	-7.2	AMBP|APOE|ARNTL|ARRB2|AUP1|BNIP3|CTSC|CLU|CTSH|CLN8|IFI27|PCBP2|DNAJC3|PSMA2|PSMB3|PSMC3|PSMD1|PSMD9|RAD23A|PPP1R11|TNFAIP3|HSP90B1|UBB|UBC|UBE2B|UBE2D3|UBE2E1|UBE2G1|UBE2H|XBP1|USP7|UBXN8|USP5|CTSF|MTA1|TRIP12|PSMF1|CLOCK|USP34|ZMPSTE24|MARCHF6|OGA|YME1L1|CLPX|USP19|ATE1|UBR4|PISD|ANAPC13|HERC4|TRPC4AP|FBXO9|USP25|UCHL5|PCYOX1|NUB1|FBXW5|RNF125|RNF126|RNF130|USE1|UGGT1|PCNP|RCN3|HACE1|RNF123|COP…	-4.2
GO Biological Processes	GO:0046394	carboxylic acid biosynthetic process	-7.1	AGXT|ALDH1A1|ASL|ASS1|BHMT|CBR1|CD74|CPS1|CYP1A1|CYP1A2|DPYD|GAMT|GGT1|GLUD1|GPX4|GSTM1|LIPC|MTRR|OTC|PAH|SCP2|UGDH|XBP1|KMO|KYNU|FADS2|QKI|AASS|PARK7|SEPHS1|HAAO|BHMT2|DECR2|GLS2|ACSM5|AGXT2|HSD3B7|OSBPL1A|OSBPL9	-4.2
GO Biological Processes	GO:0044257	cellular protein catabolic process	-7.1	ARNTL|ARRB2|AUP1|BNIP3|CTSC|CTSH|CLN8|IFI27|PCBP2|DNAJC3|PSMA2|PSMB3|PSMC3|PSMD1|PSMD9|RAD23A|PPP1R11|TNFAIP3|HSP90B1|UBB|UBC|UBE2B|UBE2D3|UBE2E1|UBE2G1|UBE2H|XBP1|USP7|UBXN8|USP5|CTSF|MTA1|TRIP12|PSMF1|CLOCK|USP34|ZMPSTE24|MARCHF6|YME1L1|CLPX|USP19|ATE1|UBR4|PISD|ANAPC13|HERC4|TRPC4AP|FBXO9|USP25|UCHL5|PCYOX1|NUB1|FBXW5|RNF125|RNF126|RNF130|UGGT1|PCNP|RCN3|HACE1|RNF123|COP1|RNF128|FBXO31|DCAF11|…	-4.2
GO Biological Processes	GO:0009074	aromatic amino acid family catabolic process	-7.1	GSTZ1|HPD|PAH|TAT|TDO2|KMO|KYNU|HAAO|AFMID	-4.1
GO Biological Processes	GO:0051603	proteolysis involved in cellular protein catabolic process	-6.9	ARNTL|ARRB2|AUP1|CTSC|CTSH|IFI27|PCBP2|DNAJC3|PSMA2|PSMB3|PSMC3|PSMD1|PSMD9|RAD23A|PPP1R11|TNFAIP3|HSP90B1|UBB|UBC|UBE2B|UBE2D3|UBE2E1|UBE2G1|UBE2H|XBP1|USP7|UBXN8|USP5|CTSF|MTA1|TRIP12|PSMF1|CLOCK|USP34|ZMPSTE24|MARCHF6|YME1L1|CLPX|USP19|ATE1|UBR4|ANAPC13|HERC4|TRPC4AP|FBXO9|USP25|UCHL5|PCYOX1|NUB1|FBXW5|RNF125|RNF126|RNF130|UGGT1|PCNP|RCN3|HACE1|RNF123|COP1|RNF128|FBXO31|DCAF11|SHARPIN|ASCC2|VP…	-4
GO Biological Processes	GO:0019439	aromatic compound catabolic process	-6.8	AMBP|KYAT1|CYP1A1|DDX5|DPYD|TYMP|GSTZ1|HNMT|HPD|EIF3E|MAOA|MAOB|MGAT1|PNP|NT5E|PAH|PON1|PON2|RNH1|TAT|TDO2|KMO|SUCLG2|SUCLG1|ZPR1|KYNU|ENTPD4|THRAP3|RIDA|MTHFS|ALDH1L1|RNPS1|TREX2|XRN2|HAAO|SND1|DCP1A|TENT4B|NEIL1|EDC3|FBH1|AFMID|UPP2|CNOT6L|NUDT7|ENTPD8	-3.9
GO Biological Processes	GO:1901361	organic cyclic compound catabolic process	-6.7	AMBP|APOE|KYAT1|SCARB1|CYP1A1|CYP1A2|DDX5|DPYD|TYMP|GSTZ1|HNMT|HPD|EIF3E|MAOA|MAOB|MGAT1|PNP|NT5E|PAH|RNH1|SULT1E1|TAT|TDO2|KMO|SUCLG2|SUCLG1|ZPR1|KYNU|ENTPD4|THRAP3|RIDA|MTHFS|ALDH1L1|RNPS1|TREX2|XRN2|HAAO|SND1|DCP1A|TENT4B|NEIL1|EDC3|FBH1|AFMID|UPP2|CNOT6L|NUDT7|ENTPD8	-3.8
GO Biological Processes	GO:0015914	phospholipid transport	-6.6	APOA1|APOC1|APOC3|APOE|SCARB1|MTTP|ABCB4|SCP2|C2CD2L|PRELID3A|ATP11A|PRELID3B|PITPNM2|ABCG8|MFSD2A|OSBPL5|OSBPL10|ATP8B3|ATP11C|ATP9B|TMEM41B	-3.7
GO Biological Processes	GO:0055090	acylglycerol homeostasis	-6.4	APOA1|APOC3|APOE|SCARB1|HNF4A|LIPC|XBP1|NR1H4|ANGPTL3|MLXIPL|ABCG8|DGAT2	-3.6
GO Biological Processes	GO:0070328	triglyceride homeostasis	-6.4	APOA1|APOC3|APOE|SCARB1|HNF4A|LIPC|XBP1|NR1H4|ANGPTL3|MLXIPL|ABCG8|DGAT2	-3.6
GO Biological Processes	GO:0006958	complement activation, classical pathway	-6.4	C3|C4A|C4BPA|C5|C6|C8B|C9|CLU|CFI|MBL2|MASP2|C1RL	-3.6
GO Biological Processes	GO:0043648	dicarboxylic acid metabolic process	-6.4	ASPA|ASS1|GGT1|GLUD1|HAL|MTRR|PHYH|SLC19A1|TAT|KMO|ALDH4A1|KYNU|MTHFS|ALDH1L1|FTCD|HAAO|GLS2|OGDHL|NIT2|SLC25A32|AMDHD1	-3.6
GO Biological Processes	GO:0006631	fatty acid metabolic process	-6.3	ACADVL|ACOX1|ADH4|C3|CBR1|CD36|CD74|MAPK14|CYP1A1|CYP1A2|CYP2C18|ACSL1|ACSL4|GCDH|GGT1|GPX4|GSTM1|HPGD|HSD17B4|LIPC|CYP4F3|PAM|PHYH|POR|PPARA|SCP2|XBP1|ACOX2|FADS2|QKI|ECI2|DECR2|ANGPTL3|PLA2G3|CRYL1|ABHD5|ACSM5|ECHDC2|BDH2|ACBD4|ACAD11|NUDT7	-3.5
GO Biological Processes	GO:0043603	cellular amide metabolic process	-6.2	ARG1|ASL|ASS1|CPS1|CTSH|DHPS|EIF2S3|EIF4A1|EIF4G1|EIF4G2|CLN8|ACSL1|ACSL4|GCDH|GGT1|GPX4|GSTA2|GSTA4|GSTM1|GSTZ1|HAGH|HAL|HSD17B4|EIF3E|MME|MTRR|NIT1|PNP|OTC|PAM|REN|RPL9|RPL10|RPL12|RPL22|RPL34|RPS11|RPS16|RPS18|RPS24|RPS25|ST3GAL1|SLC1A2|SLC19A1|TDO2|XPNPEP1|EIF4G3|SUCLG2|SUCLG1|GAL3ST1|GNE|AASS|SLC25A15|PEMT|MTHFS|FTCD|ADAMTS13|PARK7|CPEB3|ETHE1|SEC11A|SPCS1|MRPS18B|MRPL13|CERS2|ST6GALNAC6|MTR…	-3.4
GO Biological Processes	GO:0010906	regulation of glucose metabolic process	-6.1	AKT2|CLK2|FBP1|GCGR|GPLD1|GPT|IGF1|INSR|KHK|PDK2|PFKFB1|PHKG2|PPARA|STK11|USP7|KAT2B|ZMPSTE24|FAM3C|NCOA2|SORBS1|GNMT|DGAT2|SLC45A3	-3.4
GO Biological Processes	GO:0006575	cellular modified amino acid metabolic process	-6.1	ASS1|BHMT|KYAT1|GAMT|GCH1|GGT1|GPX4|GSTA2|GSTA4|GSTM1|GSTZ1|HAGH|MTRR|POR|SLC1A2|SLC19A1|ALDH4A1|MTHFS|ALDH1L1|FTCD|PARK7|ETHE1|BHMT2|GNMT|PLA2G3|PCYOX1|SLC25A32|OSBPL5|OSBPL10	-3.3
GO Biological Processes	GO:0045861	negative regulation of proteolysis	-6	A2M|AHSG|AMBP|BIN1|ARRB2|C3|C4A|C5|CAMLG|SERPINA6|CLN8|F2|HRG|IFI16|ITIH1|ITIH2|ITIH3|ITIH4|KNG1|SERPINA5|SERPINA1|PLAUR|POR|PROS1|PTPN3|PZP|TAF9|VTN|USP7|PICALM|PSMF1|TMEM59|USP19|TLK2|PARK7|PRDX5|FETUB|USP25|UCHL5|PIH1D1|MARCHF7	-3.3
GO Biological Processes	GO:0002455	humoral immune response mediated by circulating immunoglobulin	-5.9	C3|C4A|C4BPA|C5|C6|C8B|C9|CLU|CFI|MBL2|MASP2|C1RL	-3.1
GO Biological Processes	GO:0010907	positive regulation of glucose metabolic process	-5.9	AKT2|GPLD1|GPT|IGF1|INSR|PHKG2|PPARA|STK11|KAT2B|SORBS1|DGAT2|SLC45A3	-3.1
GO Biological Processes	GO:0042572	retinol metabolic process	-5.7	ADH4|ADH6|ALDH1A1|CYP1A1|CYP1A2|CYP2C18|RBP4|DHRS3|RDH11|DHRS7|PNPLA2|DGAT2	-3
GO Biological Processes	GO:0098754	detoxification	-5.7	ADH4|ALB|ALDH1A1|APOE|ESD|GPX3|GPX4|GSTM1|GSTZ1|MT2A|SLC22A18|SLC22A5|TXNRD1|PARK7|PRDX5|RDH11|SLC47A1|SLC30A10|PRXL2A|TXNDC17|PRXL2C	-3
GO Biological Processes	GO:0006953	acute-phase response	-5.7	A2M|AHSG|ASS1|F2|FN1|ITIH4|LBP|MBL2|ORM1|SERPINA1	-3
GO Biological Processes	GO:0043632	modification-dependent macromolecule catabolic process	-5.6	ARNTL|ARRB2|AUP1|IFI27|PCBP2|PSMA2|PSMB3|PSMC3|PSMD1|PSMD9|RAD23A|PPP1R11|TNFAIP3|HSP90B1|UBB|UBC|UBE2B|UBE2D3|UBE2E1|UBE2G1|UBE2H|XBP1|USP7|UBXN8|USP5|MTA1|TRIP12|PSMF1|CLOCK|USP34|ZMPSTE24|MARCHF6|USP19|ATE1|UBR4|ANAPC13|HERC4|TRPC4AP|FBXO9|USP25|UCHL5|PCYOX1|NUB1|FBXW5|RNF125|RNF126|RNF130|PCNP|HACE1|TENT4B|COP1|RNF128|FBXO31|DCAF11|SHARPIN|ASCC2|VPS25|ZFAND2A|MVB12A|KLHDC3|AGAP3|ANAPC16|NTAN1…	-3
GO Biological Processes	GO:0019941	modification-dependent protein catabolic process	-5.6	ARNTL|ARRB2|AUP1|IFI27|PCBP2|PSMA2|PSMB3|PSMC3|PSMD1|PSMD9|RAD23A|PPP1R11|TNFAIP3|HSP90B1|UBB|UBC|UBE2B|UBE2D3|UBE2E1|UBE2G1|UBE2H|XBP1|USP7|UBXN8|USP5|MTA1|TRIP12|PSMF1|CLOCK|USP34|ZMPSTE24|MARCHF6|USP19|ATE1|UBR4|ANAPC13|HERC4|TRPC4AP|FBXO9|USP25|UCHL5|PCYOX1|NUB1|FBXW5|RNF125|RNF126|RNF130|PCNP|HACE1|COP1|RNF128|FBXO31|DCAF11|SHARPIN|ASCC2|VPS25|ZFAND2A|MVB12A|KLHDC3|AGAP3|ANAPC16|NTAN1|WDR81|…	-3
GO Biological Processes	GO:0050684	regulation of mRNA processing	-5.6	CCNT1|DDX5|DHX9|FMR1|HNRNPA1|HNRNPA2B1|PTBP1|SRSF6|SFSWAP|SNRNP70|SUPT6H|FXR1|QKI|RBM39|WTAP|THRAP3|RBM5|CELF1|PAPOLA|RNPS1|CPEB3|DAZAP1|SMU1|MBNL3|PCBP4	-2.9
GO Biological Processes	GO:0010951	negative regulation of endopeptidase activity	-5.5	A2M|AHSG|AMBP|BIN1|ARRB2|C3|C4A|C5|SERPINA6|HRG|IFI16|ITIH1|ITIH2|ITIH3|ITIH4|KNG1|SERPINA5|SERPINA1|PLAUR|POR|PROS1|PZP|VTN|PICALM|PSMF1|PARK7|PRDX5|FETUB|UCHL5|PIH1D1	-2.9
GO Biological Processes	GO:0008652	cellular amino acid biosynthetic process	-5.5	AGXT|ALDH1A1|ASL|ASS1|BHMT|CPS1|DPYD|GGT1|GLUD1|MTRR|OTC|PAH|AASS|SEPHS1|BHMT2|GLS2|AGXT2	-2.9
GO Biological Processes	GO:0009072	aromatic amino acid family metabolic process	-5.5	GCDH|GSTZ1|HPD|PAH|TAT|TDO2|KMO|KYNU|HAAO|AFMID	-2.8
GO Biological Processes	GO:0042730	fibrinolysis	-5.5	F2|FGA|FGB|FGG|HRG|KLKB1|PLG|PROS1	-2.8
GO Biological Processes	GO:0034308	primary alcohol metabolic process	-5.4	ADH4|ADH6|ALDH1A1|CYP1A1|CYP1A2|CYP2C18|IGF1|RBP4|SULT1E1|SULT1A1|DHRS3|PARK7|RDH11|GDE1|DHRS7|PNPLA2|DGAT2	-2.8
GO Biological Processes	GO:0010876	lipid localization	-5.4	APOA1|APOC1|APOC3|APOE|AUP1|CD36|SCARB1|CHKA|CLU|CLN8|ACSL1|LBP|LIPC|MTTP|SERPINA5|ABCB4|PPARA|RBP4|SCP2|SLCO2A1|SLCO1A2|C2CD2L|PRELID3A|STARD10|ATP11A|ABCA6|ANGPTL3|PLA2G3|PRELID3B|PNPLA2|PITPNM2|ABCG8|DGAT2|MFSD2A|SLC22A9|OSBPL1A|OSBPL5|OSBPL9|OSBPL10|ATP8B3|ATP11C|ATP9B|TMEM41B	-2.8
GO Biological Processes	GO:0034381	plasma lipoprotein particle clearance	-5.3	APOA1|APOC1|APOC3|APOE|CD36|SCARB1|LIPA|LIPC|DGAT2	-2.7
GO Biological Processes	GO:0034375	high-density lipoprotein particle remodeling	-5.2	APOA1|APOC1|APOC3|APOE|SCARB1|LIPC|PLA2G3	-2.6
GO Biological Processes	GO:0055088	lipid homeostasis	-5.2	ACOX1|APOA1|APOC3|APOE|SCARB1|CLN8|NR5A2|HNF4A|LIPC|MTTP|ABCB4|XBP1|ACOX2|NR1H4|RALY|ANGPTL3|MLXIPL|ABHD5|PNPLA2|RTN4|RCN3|ABHD4|ABCG8|DGAT2|TLCD2	-2.6
GO Biological Processes	GO:0048024	regulation of mRNA splicing, via spliceosome	-5.1	DDX5|FMR1|HNRNPA1|HNRNPA2B1|PTBP1|SRSF6|SFSWAP|SNRNP70|FXR1|QKI|RBM39|WTAP|THRAP3|RBM5|CELF1|RNPS1|DAZAP1|SMU1|MBNL3|PCBP4	-2.6
GO Biological Processes	GO:0010466	negative regulation of peptidase activity	-5.1	A2M|AHSG|AMBP|BIN1|ARRB2|C3|C4A|C5|SERPINA6|HRG|IFI16|ITIH1|ITIH2|ITIH3|ITIH4|KNG1|SERPINA5|SERPINA1|PLAUR|POR|PROS1|PZP|VTN|PICALM|PSMF1|PARK7|PRDX5|FETUB|UCHL5|PIH1D1	-2.6
GO Biological Processes	GO:0009310	amine catabolic process	-5.1	DHPS|HNMT|MAOA|MAOB|TDO2|KMO|KYNU|HAAO|AFMID	-2.6
GO Biological Processes	GO:0042402	cellular biogenic amine catabolic process	-5.1	DHPS|HNMT|MAOA|MAOB|TDO2|KMO|KYNU|HAAO|AFMID	-2.6
GO Biological Processes	GO:0071941	nitrogen cycle metabolic process	-5	ARG1|ASL|ASS1|CPS1|OTC|SLC25A15	-2.5
GO Biological Processes	GO:0019627	urea metabolic process	-5	ARG1|ASL|ASS1|CPS1|OTC|SLC25A15	-2.5
GO Biological Processes	GO:0006568	tryptophan metabolic process	-5	GCDH|TDO2|KMO|KYNU|HAAO|AFMID	-2.5
GO Biological Processes	GO:0000050	urea cycle	-5	ARG1|ASL|ASS1|CPS1|OTC|SLC25A15	-2.5
GO Biological Processes	GO:0009308	amine metabolic process	-4.9	CYP1A1|DHPS|GCDH|GCH1|HNMT|MAOA|MAOB|OAZ1|PAH|SULT1A1|TDO2|VCAM1|KMO|KYNU|HAAO|GDE1|SAT2|AFMID	-2.4
GO Biological Processes	GO:1901607	alpha-amino acid biosynthetic process	-4.8	AGXT|ASL|ASS1|BHMT|CPS1|GGT1|GLUD1|MTRR|OTC|PAH|AASS|SEPHS1|BHMT2|GLS2|AGXT2	-2.3
GO Biological Processes	GO:0006511	ubiquitin-dependent protein catabolic process	-4.7	ARNTL|ARRB2|AUP1|IFI27|PCBP2|PSMA2|PSMB3|PSMC3|PSMD1|PSMD9|RAD23A|PPP1R11|TNFAIP3|HSP90B1|UBE2B|UBE2D3|UBE2E1|UBE2G1|UBE2H|XBP1|USP7|UBXN8|USP5|MTA1|TRIP12|PSMF1|CLOCK|USP34|MARCHF6|USP19|ATE1|UBR4|ANAPC13|HERC4|TRPC4AP|FBXO9|USP25|UCHL5|NUB1|FBXW5|RNF125|RNF126|RNF130|PCNP|HACE1|COP1|RNF128|FBXO31|DCAF11|SHARPIN|ASCC2|VPS25|ZFAND2A|MVB12A|KLHDC3|AGAP3|ANAPC16|NTAN1|WDR81|CACUL1|STT3B|SPOPL	-2.2
GO Biological Processes	GO:0030195	negative regulation of blood coagulation	-4.7	APOE|F2|FGA|FGB|FGG|HRG|KLKB1|KNG1|PLG|PROC|PROS1|VTN	-2.2
GO Biological Processes	GO:0006869	lipid transport	-4.7	APOA1|APOC1|APOC3|APOE|CD36|SCARB1|CHKA|CLU|CLN8|ACSL1|LBP|LIPC|MTTP|SERPINA5|ABCB4|RBP4|SCP2|SLCO2A1|SLCO1A2|C2CD2L|PRELID3A|STARD10|ATP11A|ABCA6|PLA2G3|PRELID3B|PITPNM2|ABCG8|MFSD2A|SLC22A9|OSBPL1A|OSBPL5|OSBPL9|OSBPL10|ATP8B3|ATP11C|ATP9B|TMEM41B	-2.2
GO Biological Processes	GO:0044270	cellular nitrogen compound catabolic process	-4.7	AMBP|BHMT|DDX5|DPYD|TYMP|HNMT|EIF3E|MGAT1|NIT1|PNP|NT5E|POR|RNH1|TDO2|KMO|SUCLG2|SUCLG1|ZPR1|KYNU|ENTPD4|THRAP3|RIDA|MTHFS|ALDH1L1|RNPS1|TREX2|XRN2|HAAO|SND1|DCP1A|TENT4B|NEIL1|EDC3|FBH1|AFMID|UPP2|CNOT6L|NUDT7|ENTPD8	-2.2
GO Biological Processes	GO:0030162	regulation of proteolysis	-4.7	A2M|AHSG|AMBP|BIN1|APOE|ARRB2|C3|C4A|C5|CAMLG|SERPINA6|CTSC|CLU|CTSH|DAB2|CLN8|F2|FMR1|FN1|GPLD1|HPN|HRG|IFI16|ITIH1|ITIH2|ITIH3|ITIH4|KLKB1|KNG1|LGALS9|SERPINA5|SERPINA1|PLAUR|POR|PROS1|PSMC3|PTPN3|PZP|RAD23A|SUMO2|TAF9|UBB|VTN|USP7|USP5|PICALM|ADAM9|PDCD5|PSMF1|TMEM59|DELE1|CLPX|USP19|TLK2|PARK7|GRAMD4|PRDX5|FBXW8|FETUB|USP25|PACSIN3|UCHL5|NUB1|CYCS|AURKAIP1|PIH1D1|RCN3|COP1|MARCHF7|ZFAND2A|SPO…	-2.2
GO Biological Processes	GO:0062012	regulation of small molecule metabolic process	-4.7	ACADVL|AKT2|APOA1|APOC1|APOC3|APOE|ARNT|BHMT|CD74|CLK2|DAB2|FBP1|GCGR|GPLD1|GPT|IGF1|INSR|KHK|PDK2|PFKFB1|PHKG2|POR|PPARA|STK11|USP7|KAT2B|NCOR2|NR1H4|ZMPSTE24|FAM3C|NCOA2|SORBS1|PARK7|GNMT|PLA2G3|MLXIPL|DGAT2|MFSD2A|SLC45A3|PRXL2C	-2.2
GO Biological Processes	GO:1900047	negative regulation of hemostasis	-4.6	APOE|F2|FGA|FGB|FGG|HRG|KLKB1|KNG1|PLG|PROC|PROS1|VTN	-2.2
GO Biological Processes	GO:0006586	indolalkylamine metabolic process	-4.6	GCDH|TDO2|KMO|KYNU|HAAO|AFMID	-2.2
GO Biological Processes	GO:0009636	response to toxic substance	-4.6	ADH4|ALB|ALDH1A1|APOE|ARG1|ASS1|CPS1|CYP1A1|ESD|GPX3|GPX4|GSTM1|GSTZ1|MAOB|MT2A|SLC22A18|PON1|PON2|SLC22A5|TXNRD1|ADAMTS13|PARK7|PRDX5|RDH11|SLC47A1|SLC30A10|PRXL2A|TXNDC17|PRXL2C	-2.2
GO Biological Processes	GO:0000377	RNA splicing, via transesterification reactions with bulged adenosine as nucleophile	-4.6	DDX5|DHX9|FRG1|HNRNPA1|HNRNPA2B1|HNRNPC|HNRNPH3|HNRNPM|SRSF5|SRSF6|SFSWAP|SNRNP70|SNRPC|DHX38|DDX46|RBM5|ALYREF|CELF1|TXNL4A|RNPS1|RALY|SF3B1|SRRM2|LUC7L2|LUC7L3|PRPF39|SMU1|PRPF40A|LUC7L|PTBP2|ZCRB1|HNRNPA3	-2.2
GO Biological Processes	GO:0000398	mRNA splicing, via spliceosome	-4.6	DDX5|DHX9|FRG1|HNRNPA1|HNRNPA2B1|HNRNPC|HNRNPH3|HNRNPM|SRSF5|SRSF6|SFSWAP|SNRNP70|SNRPC|DHX38|DDX46|RBM5|ALYREF|CELF1|TXNL4A|RNPS1|RALY|SF3B1|SRRM2|LUC7L2|LUC7L3|PRPF39|SMU1|PRPF40A|LUC7L|PTBP2|ZCRB1|HNRNPA3	-2.2
GO Biological Processes	GO:0062013	positive regulation of small molecule metabolic process	-4.5	AKT2|APOA1|ARNT|CD74|DAB2|GPLD1|GPT|IGF1|INSR|PHKG2|POR|PPARA|STK11|KAT2B|NR1H4|SORBS1|PARK7|PLA2G3|MLXIPL|DGAT2|SLC45A3|PRXL2C	-2.1
GO Biological Processes	GO:0071830	triglyceride-rich lipoprotein particle clearance	-4.5	APOC1|APOC3|APOE|LIPC	-2.1
GO Biological Processes	GO:0034382	chylomicron remnant clearance	-4.5	APOC1|APOC3|APOE|LIPC	-2.1
GO Biological Processes	GO:0031347	regulation of defense response	-4.5	A2M|AHSG|APOA1|APOE|ARG1|ARRB2|C3|CD1D|CD47|CTSC|CRK|MAPK14|DHX9|GGT1|GPX4|CFH|HPX|IFI16|IGF1|IL6ST|KLKB1|LBP|LGALS1|LGALS9|MBL2|NONO|NT5E|PCBP2|PPARA|PPM1B|MAPK3|PROC|SEC14L1|STAT1|VAMP7|TARBP2|TNFAIP3|CLOCK|NR1H4|ZMPSTE24|CELF1|PARK7|CDK19|CADM1|LSM14A|RABGEF1|ZDHHC1|PLA2G3|TRIM44|RNF125|ASH1L|MAVS|ILRUN|COLEC11|SETD6|SHARPIN|MACIR|PIK3AP1	-2.1
GO Biological Processes	GO:0045913	positive regulation of carbohydrate metabolic process	-4.5	AKT2|ARNT|GPLD1|GPT|IGF1|INSR|PHKG2|PPARA|STK11|KAT2B|SORBS1|MLXIPL|DGAT2|SLC45A3|PRXL2C	-2.1
GO Biological Processes	GO:0030193	regulation of blood coagulation	-4.5	APOE|CD36|F2|FGA|FGB|FGG|HRG|KLKB1|KNG1|PLAUR|PLG|PROC|PROS1|ST3GAL4|VTN	-2.1
GO Biological Processes	GO:0097006	regulation of plasma lipoprotein particle levels	-4.5	APOA1|APOC1|APOC3|APOE|CD36|SCARB1|LIPA|LIPC|MTTP|PLA2G3|DGAT2|MFSD2A	-2.1
GO Biological Processes	GO:0010676	positive regulation of cellular carbohydrate metabolic process	-4.5	AKT2|GPLD1|GPT|IGF1|INSR|PHKG2|PPARA|STK11|KAT2B|SORBS1|DGAT2|SLC45A3	-2.1
GO Biological Processes	GO:0006376	mRNA splice site selection	-4.5	SRSF5|SRSF6|SFSWAP|SNRPC|CELF1|LUC7L2|LUC7L3|PRPF39|LUC7L|PTBP2	-2.1
GO Biological Processes	GO:0051346	negative regulation of hydrolase activity	-4.4	A2M|AHSG|AMBP|BIN1|APOA1|APOC1|APOC3|ARRB2|C3|C4A|C5|SERPINA6|HRG|IFI16|ITIH1|ITIH2|ITIH3|ITIH4|KNG1|SERPINA5|SERPINA1|PLAUR|POR|PTPA|PROS1|PZP|PPP1R11|VTN|PICALM|PSMF1|PARK7|SLC39A14|PRDX5|FETUB|ANGPTL3|UCHL5|PIH1D1|NEIL1	-2.1
GO Biological Processes	GO:0006569	tryptophan catabolic process	-4.4	TDO2|KMO|KYNU|HAAO|AFMID	-2.1
GO Biological Processes	GO:0046218	indolalkylamine catabolic process	-4.4	TDO2|KMO|KYNU|HAAO|AFMID	-2.1
GO Biological Processes	GO:0042436	indole-containing compound catabolic process	-4.4	TDO2|KMO|KYNU|HAAO|AFMID	-2.1
GO Biological Processes	GO:0000375	RNA splicing, via transesterification reactions	-4.4	DDX5|DHX9|FRG1|HNRNPA1|HNRNPA2B1|HNRNPC|HNRNPH3|HNRNPM|SRSF5|SRSF6|SFSWAP|SNRNP70|SNRPC|DHX38|DDX46|RBM5|ALYREF|CELF1|TXNL4A|RNPS1|RALY|SF3B1|SRRM2|LUC7L2|LUC7L3|PRPF39|SMU1|PRPF40A|LUC7L|PTBP2|ZCRB1|HNRNPA3	-2.1
GO Biological Processes	GO:0010675	regulation of cellular carbohydrate metabolic process	-4.4	AKT2|CLK2|FBP1|GCGR|GPLD1|GPT|IGF1|INSR|KHK|PDK2|PFKFB1|PHKG2|PPARA|STK11|USP7|KAT2B|ZMPSTE24|FAM3C|NCOA2|SORBS1|GNMT|DGAT2|SLC45A3	-2.1
GO Biological Processes	GO:0050819	negative regulation of coagulation	-4.4	APOE|F2|FGA|FGB|FGG|HRG|KLKB1|KNG1|PLG|PROC|PROS1|VTN	-2
GO Biological Processes	GO:0006109	regulation of carbohydrate metabolic process	-4.4	AKT2|ARNT|CLK2|FBP1|GCGR|GPLD1|GPT|IGF1|INSR|KHK|PDK2|PFKFB1|PHKG2|PPARA|STK11|USP7|KAT2B|ZMPSTE24|FAM3C|NCOA2|SORBS1|GNMT|MLXIPL|DGAT2|SLC45A3|PRXL2C	-2
GO Biological Processes	GO:0046889	positive regulation of lipid biosynthetic process	-4.3	APOA1|APOE|SCARB1|CD74|DAB2|GPLD1|POR|PPARA|NR1H4|SORBS1|SIRT3|PLA2G3|MLXIPL|DGAT2|MFSD2A|SLC45A3	-2
GO Biological Processes	GO:0006959	humoral immune response	-4.3	CFB|C3|C4A|C4BPA|C5|C6|C8B|C9|CLU|F2|FGA|FGB|CFH|HRG|CFI|MBL2|MASP1|TF|MASP2|C1RL|COLEC11	-2
GO Biological Processes	GO:0010043	response to zinc ion	-4.3	ARG1|ASS1|CPS1|KHK|MT2A|OTC|PAM|VCAM1|SLC30A2|HAAO|SLC30A10	-2
GO Biological Processes	GO:1900046	regulation of hemostasis	-4.3	APOE|CD36|F2|FGA|FGB|FGG|HRG|KLKB1|KNG1|PLAUR|PLG|PROC|PROS1|ST3GAL4|VTN	-2
GO Biological Processes	GO:0009064	glutamine family amino acid metabolic process	-4.3	ARG1|ASL|ASS1|CPS1|GGT1|GLUD1|HAL|OTC|TAT|ALDH4A1|MTHFS|FTCD|GLS2|NIT2|AMDHD1	-2
GO Biological Processes	GO:0034369	plasma lipoprotein particle remodeling	-4.3	APOA1|APOC1|APOC3|APOE|SCARB1|LIPC|MTTP|PLA2G3	-2
GO Biological Processes	GO:0034368	protein-lipid complex remodeling	-4.3	APOA1|APOC1|APOC3|APOE|SCARB1|LIPC|MTTP|PLA2G3	-2
GO Biological Processes	GO:1901615	organic hydroxy compound metabolic process	-4.3	ADH4|ADH6|ALDH1A1|APOA1|APOE|SCARB1|CYP1A1|CYP1A2|CYP2C18|DPAGT1|CLN8|FDPS|NR5A2|GC|GCH1|GK|HAGH|IDH3G|IGF1|LIPA|LIPC|CYP4F3|MAOA|MAOB|NFE2L1|PAH|PON1|RBP4|SCP2|SORD|SULT1E1|SULT1A1|DHRS3|NR1H4|PARK7|PPIP5K2|ANGPTL3|RDH11|IP6K2|GDE1|DHRS7|PNPLA2|HSD3B7|DGAT2|OSBPL1A|OSBPL5|OSBPL9|LDHD|GK5	-2
GO Biological Processes	GO:0046700	heterocycle catabolic process	-4.2	AMBP|CYP1A1|DDX5|DPYD|TYMP|HNMT|EIF3E|MGAT1|PNP|NT5E|RNH1|TDO2|KMO|SUCLG2|SUCLG1|ZPR1|KYNU|ENTPD4|THRAP3|RIDA|MTHFS|ALDH1L1|RNPS1|TREX2|XRN2|HAAO|SND1|DCP1A|TENT4B|NEIL1|EDC3|FBH1|AFMID|UPP2|CNOT6L|NUDT7|ENTPD8	-1.9
GO Biological Processes	GO:0050818	regulation of coagulation	-4.2	APOE|CD36|F2|FGA|FGB|FGG|HRG|KLKB1|KNG1|PLAUR|PLG|PROC|PROS1|ST3GAL4|VTN	-1.9
GO Biological Processes	GO:0000381	regulation of alternative mRNA splicing, via spliceosome	-4.1	DDX5|FMR1|HNRNPA1|PTBP1|SRSF6|FXR1|WTAP|THRAP3|RBM5|CELF1|RNPS1|SMU1|MBNL3	-1.9
GO Biological Processes	GO:0000245	spliceosomal complex assembly	-4	SRSF5|SRSF6|SFSWAP|SNRPC|RBM5|CELF1|TXNL4A|SF3B1|LUC7L2|LUC7L3|PRPF39|LUC7L|PTBP2	-1.8
GO Biological Processes	GO:0006790	sulfur compound metabolic process	-4	AGXT|BHMT|CDO1|CPS1|SLC26A2|ACSL1|ACSL4|GCDH|GGT1|GHR|GPX4|GSTA2|GSTA4|GSTM1|GSTZ1|HAGH|HSD17B4|NDST1|HYAL1|MTRR|ST3GAL1|ST3GAL4|SLC1A2|SULT1E1|SULT1A1|TDO2|UGDH|SUCLG2|SUCLG1|AASS|PARK7|ETHE1|BHMT2|GNMT|PIPOX|ACSM5|SQOR|DGAT2|NUDT7	-1.8
GO Biological Processes	GO:0042178	xenobiotic catabolic process	-4	CRYZ|CYP1A1|CYP1A2|ACSL1|FMO4|GSTM1	-1.8
GO Biological Processes	GO:0043691	reverse cholesterol transport	-4	APOA1|APOC3|APOE|SCARB1|CLU|LIPC	-1.8
GO Biological Processes	GO:0006957	complement activation, alternative pathway	-4	CFB|C3|C5|C8B|C9|CFH	-1.8
GO Biological Processes	GO:0110095	cellular detoxification of aldehyde	-4	ADH4|ALDH1A1|ESD|PARK7|RDH11	-1.8
GO Biological Processes	GO:0006066	alcohol metabolic process	-4	ADH4|ADH6|ALDH1A1|APOA1|APOE|SCARB1|CYP1A1|CYP1A2|CYP2C18|DPAGT1|CLN8|FDPS|GCH1|GK|IDH3G|IGF1|LIPC|NFE2L1|PON1|RBP4|SORD|SULT1E1|SULT1A1|DHRS3|PARK7|PPIP5K2|ANGPTL3|RDH11|IP6K2|GDE1|DHRS7|PNPLA2|DGAT2|OSBPL1A|OSBPL5|GK5	-1.8
GO Biological Processes	GO:0006111	regulation of gluconeogenesis	-4	CLK2|FBP1|GPT|PDK2|PPARA|STK11|USP7|KAT2B|FAM3C|GNMT|DGAT2	-1.8
GO Biological Processes	GO:0034367	protein-containing complex remodeling	-4	APOA1|APOC1|APOC3|APOE|SCARB1|LIPC|MTTP|PLA2G3	-1.8
GO Biological Processes	GO:0006805	xenobiotic metabolic process	-4	CBR1|CRYZ|CYP1A1|CYP1A2|CYP2C18|ACSL1|FMO4|GSTA2|GSTA4|GSTM1|HNF4A|POR|SULT1A1|UGT1A6	-1.8
GO Biological Processes	GO:0050688	regulation of defense response to virus	-4	DHX9|PCBP2|PPM1B|SEC14L1|STAT1|TARBP2|TNFAIP3|ZMPSTE24|ZDHHC1|TRIM44|RNF125|MAVS|ILRUN	-1.8
GO Biological Processes	GO:0071825	protein-lipid complex subunit organization	-3.9	BIN1|APOA1|APOC1|APOC3|APOE|SCARB1|LIPC|MTTP|PLA2G3|MFSD2A	-1.7
GO Biological Processes	GO:0090207	regulation of triglyceride metabolic process	-3.9	APOA1|APOC3|APOE|C3|SCARB1|GPLD1|ABHD5|PNPLA2|DGAT2|MFSD2A	-1.7
GO Biological Processes	GO:0006536	glutamate metabolic process	-3.9	GGT1|GLUD1|HAL|TAT|ALDH4A1|MTHFS|FTCD|GLS2|AMDHD1	-1.7
GO Biological Processes	GO:0010498	proteasomal protein catabolic process	-3.9	ARNTL|ARRB2|AUP1|IFI27|PCBP2|PSMA2|PSMB3|PSMC3|PSMD1|RAD23A|HSP90B1|UBE2B|UBE2D3|UBE2G1|UBE2H|XBP1|UBXN8|MTA1|TRIP12|PSMF1|CLOCK|MARCHF6|USP19|ATE1|ANAPC13|TRPC4AP|FBXO9|FBXW5|RNF126|UGGT1|PCNP|RCN3|HACE1|COP1|FBXO31|DCAF11|SHARPIN|ASCC2|ZFAND2A|KLHDC3|AGAP3|ANAPC16|STT3B|SPOPL	-1.7
GO Biological Processes	GO:0045834	positive regulation of lipid metabolic process	-3.9	AKT2|APOA1|APOC1|APOE|SCARB1|CD74|DAB2|F2|FGFR3|GPLD1|POR|PPARA|NR1H4|SORBS1|SIRT3|ANGPTL3|PLA2G3|MLXIPL|ABHD5|PNPLA2|DGAT2|MFSD2A|SLC45A3	-1.7
GO Biological Processes	GO:0044106	cellular amine metabolic process	-3.9	DHPS|GCDH|GCH1|HNMT|MAOA|MAOB|OAZ1|PAH|SULT1A1|TDO2|KMO|KYNU|HAAO|GDE1|SAT2|AFMID	-1.7
GO Biological Processes	GO:0006576	cellular biogenic amine metabolic process	-3.9	DHPS|GCDH|GCH1|HNMT|MAOA|MAOB|OAZ1|PAH|SULT1A1|TDO2|KMO|KYNU|HAAO|GDE1|SAT2|AFMID	-1.7
GO Biological Processes	GO:0034201	response to oleic acid	-3.9	ASS1|CPS1|ACSL1|DGAT2	-1.7
GO Biological Processes	GO:0006721	terpenoid metabolic process	-3.8	ADH4|ADH6|ALDH1A1|CYP1A1|CYP1A2|CYP2C18|FDPS|RBP4|DHRS3|GGPS1|RDH11|DHRS7|PNPLA2|DGAT2	-1.7
GO Biological Processes	GO:0046185	aldehyde catabolic process	-3.8	ADH4|AGXT|ESD|HAGH|PARK7|AGXT2	-1.6
GO Biological Processes	GO:1990748	cellular detoxification	-3.8	ADH4|ALB|ALDH1A1|APOE|ESD|GPX3|GPX4|GSTM1|GSTZ1|TXNRD1|PARK7|PRDX5|RDH11|PRXL2A|TXNDC17|PRXL2C	-1.6
GO Biological Processes	GO:0006720	isoprenoid metabolic process	-3.8	ADH4|ADH6|ALDH1A1|CYP1A1|CYP1A2|CYP2C18|DPAGT1|FDPS|PHYH|RBP4|DHRS3|GGPS1|RDH11|DHRS7|PNPLA2|DGAT2	-1.6
GO Biological Processes	GO:0002526	acute inflammatory response	-3.7	A2M|AHSG|ASS1|F2|FN1|ITIH4|KLKB1|LBP|MBL2|ORM1|SERPINA1|VCAM1	-1.5
GO Biological Processes	GO:0033119	negative regulation of RNA splicing	-3.7	HNRNPA2B1|PTBP1|SRSF6|SFSWAP|PTBP3|RNPS1|PCBP4|PTBP2	-1.5
GO Biological Processes	GO:0061045	negative regulation of wound healing	-3.6	APOE|CRK|F2|FGA|FGB|FGG|HRG|KLKB1|KNG1|PLG|PROC|PROS1|VTN	-1.5
GO Biological Processes	GO:0001523	retinoid metabolic process	-3.6	ADH4|ADH6|ALDH1A1|CYP1A1|CYP1A2|CYP2C18|RBP4|DHRS3|RDH11|DHRS7|PNPLA2|DGAT2	-1.5
GO Biological Processes	GO:0015918	sterol transport	-3.6	APOA1|APOC1|APOC3|APOE|CD36|SCARB1|CLU|LIPC|MTTP|ABCG8|OSBPL1A|OSBPL5|OSBPL9|OSBPL10	-1.5
GO Biological Processes	GO:0090208	positive regulation of triglyceride metabolic process	-3.6	APOA1|SCARB1|GPLD1|ABHD5|PNPLA2|DGAT2|MFSD2A	-1.5
GO Biological Processes	GO:0033762	response to glucagon	-3.6	ARG1|ASS1|CDO1|CPS1|GCGR|PFKFB1|STK11	-1.5
GO Biological Processes	GO:0120254	olefinic compound metabolic process	-3.6	ADH4|ADH6|ALDH1A1|CBR1|CYP1A1|CYP1A2|CYP2C18|GPX4|CYP4F3|RBP4|SCP2|DHRS3|FADS2|RDH11|DHRS7|PNPLA2|DGAT2	-1.5
GO Biological Processes	GO:0019395	fatty acid oxidation	-3.6	ACADVL|ACOX1|ADH4|MAPK14|GCDH|HSD17B4|PHYH|POR|SCP2|ACOX2|ECI2|DECR2|ECHDC2|BDH2|ACAD11	-1.5
GO Biological Processes	GO:0072376	protein activation cascade	-3.5	F13B|FGA|FGB|FGG|FN1|KLKB1	-1.4
GO Biological Processes	GO:0034754	cellular hormone metabolic process	-3.5	ADH4|ADH6|ALDH1A1|CYP1A1|CYP1A2|CYP2C18|HSD17B4|RBP4|SULT1E1|SULT1A1|DHRS3|RDH11|DHRS7|PNPLA2|DGAT2	-1.4
GO Biological Processes	GO:0043161	proteasome-mediated ubiquitin-dependent protein catabolic process	-3.5	ARNTL|ARRB2|AUP1|IFI27|PCBP2|PSMA2|PSMB3|PSMC3|PSMD1|RAD23A|HSP90B1|UBE2B|UBE2D3|UBE2G1|UBE2H|UBXN8|MTA1|TRIP12|PSMF1|CLOCK|MARCHF6|USP19|ANAPC13|TRPC4AP|FBXO9|FBXW5|RNF126|PCNP|HACE1|COP1|FBXO31|DCAF11|SHARPIN|ASCC2|ZFAND2A|KLHDC3|AGAP3|ANAPC16|STT3B|SPOPL	-1.4
GO Biological Processes	GO:0055086	nucleobase-containing small molecule metabolic process	-3.5	ADK|ATP5F1D|ATP5MC3|CPS1|DPAGT1|DPYD|SLC26A2|TYMP|ACSL1|ACSL4|GCDH|HSD17B4|MGAT1|NDUFA3|NDUFA9|NDUFB6|NDUFS4|NDUFS8|PNP|NT5E|PFKFB1|PRPSAP2|SDHC|SULT1E1|SULT1A1|TDO2|TK2|UGDH|KMO|SUCLG2|SUCLG1|KYNU|ENTPD4|GNE|AASS|NME6|PARK7|HAAO|GNMT|PIPOX|RAB23|PANK1|NMRK1|ACSM5|NAXD|OGDHL|UGGT1|NEIL1|ADPGK|DGAT2|AFMID|UPP2|NUDT7|ENTPD8	-1.4
GO Biological Processes	GO:0071827	plasma lipoprotein particle organization	-3.4	APOA1|APOC1|APOC3|APOE|SCARB1|LIPC|MTTP|PLA2G3|MFSD2A	-1.3
GO Biological Processes	GO:0015942	formate metabolic process	-3.4	HAL|MTHFS|FTCD|AMDHD1	-1.3
GO Biological Processes	GO:0034354	'de novo' NAD biosynthetic process from tryptophan	-3.4	KMO|KYNU|HAAO|AFMID	-1.3
GO Biological Processes	GO:0042182	ketone catabolic process	-3.4	KYAT1|HAGH|CYP4F3|KYNU|PARK7	-1.3
GO Biological Processes	GO:0019805	quinolinate biosynthetic process	-3.4	KMO|KYNU|HAAO	-1.3
GO Biological Processes	GO:0043420	anthranilate metabolic process	-3.4	KMO|KYNU|HAAO	-1.3
GO Biological Processes	GO:0071400	cellular response to oleic acid	-3.4	ASS1|CPS1|DGAT2	-1.3
GO Biological Processes	GO:0072329	monocarboxylic acid catabolic process	-3.4	ACADVL|ACOX1|AGXT|GCDH|HSD17B4|CYP4F3|PHYH|SCP2|ACOX2|ECI2|DECR2|ECHDC2|BDH2|AGXT2|ACAD11|LDHD|NUDT7	-1.3
GO Biological Processes	GO:0051917	regulation of fibrinolysis	-3.4	F2|HRG|KLKB1|PLAUR|PLG|VTN	-1.3
GO Biological Processes	GO:0061041	regulation of wound healing	-3.4	APOE|CD36|CRK|F2|FGA|FGB|FGG|HRG|KLKB1|KNG1|PLAUR|PLG|PROC|PROS1|SRSF6|ST3GAL4|TNFAIP3|VTN|XBP1	-1.3
GO Biological Processes	GO:0016101	diterpenoid metabolic process	-3.3	ADH4|ADH6|ALDH1A1|CYP1A1|CYP1A2|CYP2C18|RBP4|DHRS3|RDH11|DHRS7|PNPLA2|DGAT2	-1.3
GO Biological Processes	GO:0097237	cellular response to toxic substance	-3.3	ADH4|ALB|ALDH1A1|APOE|ESD|GPX3|GPX4|GSTM1|GSTZ1|TXNRD1|PARK7|PRDX5|RDH11|PRXL2A|TXNDC17|PRXL2C	-1.3
GO Biological Processes	GO:0009066	aspartate family amino acid metabolic process	-3.3	ASPA|ASS1|BHMT|MTRR|AASS|RIDA|BHMT2|GNMT|PIPOX|NIT2|ASPG	-1.2
GO Biological Processes	GO:0034440	lipid oxidation	-3.3	ACADVL|ACOX1|ADH4|MAPK14|GCDH|HSD17B4|PHYH|POR|SCP2|ACOX2|ECI2|DECR2|ECHDC2|BDH2|ACAD11	-1.2
GO Biological Processes	GO:0042632	cholesterol homeostasis	-3.3	APOA1|APOC3|APOE|SCARB1|NR5A2|HNF4A|LIPC|MTTP|XBP1|NR1H4|RALY|ANGPTL3|ABCG8|DGAT2	-1.2
GO Biological Processes	GO:0010565	regulation of cellular ketone metabolic process	-3.3	ACADVL|AKT2|APOA1|APOC1|APOC3|BHMT|CD74|DAB2|PDK2|PPARA|NCOR2|NR1H4|PARK7|PLA2G3|MLXIPL|DGAT2|MFSD2A|SLC45A3	-1.2
GO Biological Processes	GO:0043255	regulation of carbohydrate biosynthetic process	-3.2	AKT2|CLK2|FBP1|GPT|IGF1|INSR|PDK2|PPARA|STK11|USP7|KAT2B|FAM3C|SORBS1|GNMT|DGAT2	-1.2
GO Biological Processes	GO:0055092	sterol homeostasis	-3.2	APOA1|APOC3|APOE|SCARB1|NR5A2|HNF4A|LIPC|MTTP|XBP1|NR1H4|RALY|ANGPTL3|ABCG8|DGAT2	-1.2
GO Biological Processes	GO:0032102	negative regulation of response to external stimulus	-3.2	A2M|APOA1|APOE|ARG1|ARRB2|C5|CRK|MAPK14|F2|FGA|FGB|FGG|HRG|IFI16|IGF1|KLKB1|KNG1|LGALS9|NT5E|PCBP2|PLG|PPARA|PPM1B|PROC|PROS1|SEC14L1|TARBP2|TNFAIP3|VTN|NR1H4|RABGEF1|CERS2|RNF125|ASH1L|SEMA4G|ILRUN|RIN3|SHARPIN|MACIR	-1.1
GO Biological Processes	GO:0035461	vitamin transmembrane transport	-3.2	SCARB1|GC|SLC19A1|SLC5A6|ABCC5|SLC25A32	-1.1
GO Biological Processes	GO:0030212	hyaluronan metabolic process	-3.2	HYAL1|ITIH1|ITIH2|ITIH3|ITIH4|ABCC5	-1.1
GO Biological Processes	GO:0070189	kynurenine metabolic process	-3.2	KYAT1|TDO2|KMO|KYNU|AFMID	-1.1
GO Biological Processes	GO:0043650	dicarboxylic acid biosynthetic process	-3.2	GLUD1|KMO|KYNU|HAAO|GLS2	-1.1
GO Biological Processes	GO:0070875	positive regulation of glycogen metabolic process	-3.2	AKT2|IGF1|INSR|PHKG2|SORBS1	-1.1
GO Biological Processes	GO:0044273	sulfur compound catabolic process	-3.2	AGXT|CDO1|GGT1|HYAL1|MTRR|SUCLG2|SUCLG1|NUDT7	-1.1
GO Biological Processes	GO:1903311	regulation of mRNA metabolic process	-3.1	CCNT1|MAPK14|DDX5|DHX9|FMR1|HNRNPA1|HNRNPA2B1|HNRNPC|HNRNPM|PTBP1|SRSF6|SFSWAP|SNRNP70|SUPT6H|FXR1|QKI|RBM39|WTAP|THRAP3|RBM5|RIDA|CELF1|PAPOLA|RNPS1|CPEB3|DAZAP1|A1CF|SMU1|MBNL3|DCP1A|PCBP4|FASTKD5|TENT4B|CNOT6L	-1.1
GO Biological Processes	GO:0065005	protein-lipid complex assembly	-3.1	BIN1|APOA1|APOC1|APOC3|APOE|MTTP|MFSD2A	-1.1
GO Biological Processes	GO:0006641	triglyceride metabolic process	-3.1	APOC1|APOC3|APOE|CPS1|ACSL1|GK|LIPC|MTTP|PNPLA2|DGAT2|GK5	-1.1
GO Biological Processes	GO:0006558	L-phenylalanine metabolic process	-3.1	GSTZ1|HPD|PAH|TAT	-1.1
GO Biological Processes	GO:1902222	erythrose 4-phosphate/phosphoenolpyruvate family amino acid catabolic process	-3.1	GSTZ1|HPD|PAH|TAT	-1.1
GO Biological Processes	GO:1902221	erythrose 4-phosphate/phosphoenolpyruvate family amino acid metabolic process	-3.1	GSTZ1|HPD|PAH|TAT	-1.1
GO Biological Processes	GO:0034627	'de novo' NAD biosynthetic process	-3.1	KMO|KYNU|HAAO|AFMID	-1.1
GO Biological Processes	GO:0006559	L-phenylalanine catabolic process	-3.1	GSTZ1|HPD|PAH|TAT	-1.1
GO Biological Processes	GO:0001867	complement activation, lectin pathway	-3.1	MBL2|MASP1|MASP2|COLEC11	-1.1
GO Biological Processes	GO:0009812	flavonoid metabolic process	-3.1	CYP1A1|POR|SULT1A1|UGT1A6	-1.1
GO Biological Processes	GO:1903035	negative regulation of response to wounding	-3.1	APOE|CRK|F2|FGA|FGB|FGG|HRG|KLKB1|KNG1|PLG|PROC|PROS1|VTN|CERS2	-1.1
GO Biological Processes	GO:0000096	sulfur amino acid metabolic process	-3	AGXT|BHMT|CDO1|CPS1|GGT1|MTRR|BHMT2|GNMT	-1.1
GO Biological Processes	GO:0016042	lipid catabolic process	-3	ACADVL|ACOX1|APOC3|APOE|SCARB1|CPS1|CYP1A2|GCDH|HSD17B4|LIPA|LIPC|CYP4F3|PHYH|SCP2|SULT1E1|ACOX2|ECI2|DECR2|ANGPTL3|GDE1|ECHDC2|SMPD4|GPCPD1|BDH2|PNPLA2|ABHD4|PLBD1|ACAD11|NUDT7|ASPG	-1
GO Biological Processes	GO:0042537	benzene-containing compound metabolic process	-3	KYAT1|GSTM1|TDO2|KMO|KYNU|HAAO|AFMID	-1
GO Biological Processes	GO:0002831	regulation of response to biotic stimulus	-3	A2M|APOE|ARG1|ARRB2|CD1D|CD36|CRK|DHX9|CFH|HPX|HRG|IFI16|LBP|LGALS9|MBL2|NONO|PCBP2|PPM1B|MAPK3|SEC14L1|STAT1|TARBP2|TNFAIP3|ZMPSTE24|CADM1|ANKRD17|LSM14A|ZDHHC1|TRIM44|RNF125|MAVS|ILRUN|COLEC11	-0.99
GO Biological Processes	GO:0015711	organic anion transport	-3	AGXT|CD36|CD47|SLC26A2|SLC29A1|CLN8|MTTP|ABCB4|SLC1A2|SLC4A2|SLC7A2|SLC19A1|SLCO2A1|SLCO1A2|SLC5A6|SLC22A6|SLC17A4|ABCC5|SLC25A15|SLC35A1|SLC38A3|PLA2G3|SLC35C2|SLC47A1|LRRC8A|SLC2A9|SLC25A32|MFSD2A|SFXN1|SLC22A9|SLC26A8|SLC36A4	-0.99
GO Biological Processes	GO:0055091	phospholipid homeostasis	-3	APOA1|HNF4A|ANGPTL3|RCN3|TLCD2	-0.99
GO Biological Processes	GO:0072378	blood coagulation, fibrin clot formation	-3	F13B|FGA|FGB|FGG|FN1	-0.99
GO Biological Processes	GO:0010896	regulation of triglyceride catabolic process	-3	APOA1|APOC3|GPLD1|ABHD5|PNPLA2	-0.99
GO Biological Processes	GO:0031638	zymogen activation	-3	CTSH|FGA|FGB|FGG|GGT1|HGFAC|IFI16|KLKB1|C1RL|CYCS	-0.99
GO Biological Processes	GO:1903312	negative regulation of mRNA metabolic process	-2.9	CCNT1|MAPK14|DHX9|FMR1|HNRNPA2B1|HNRNPC|PTBP1|SRSF6|SFSWAP|THRAP3|RNPS1|A1CF|PCBP4|TENT4B	-0.97
GO Biological Processes	GO:0006753	nucleoside phosphate metabolic process	-2.9	ADK|ATP5F1D|ATP5MC3|DPYD|SLC26A2|TYMP|ACSL1|ACSL4|GCDH|HSD17B4|NDUFA3|NDUFA9|NDUFB6|NDUFS4|NDUFS8|PNP|NT5E|PFKFB1|PRPSAP2|SDHC|SULT1E1|SULT1A1|TDO2|TK2|KMO|SUCLG2|SUCLG1|KYNU|ENTPD4|AASS|NME6|PARK7|HAAO|PIPOX|RAB23|PANK1|NMRK1|ACSM5|NAXD|OGDHL|NEIL1|ADPGK|DGAT2|AFMID|UPP2|NUDT7|ENTPD8	-0.97
GO Biological Processes	GO:0050994	regulation of lipid catabolic process	-2.9	AKT2|APOA1|APOC1|APOC3|SCARB1|GPLD1|PPARA|ANGPTL3|ABHD5|PNPLA2|MFSD2A	-0.97
GO Biological Processes	GO:0050817	coagulation	-2.9	CD36|MAPK14|F2|F5|F13B|FGA|FGB|FGG|FN1|GNAS|HGFAC|HNF4A|HRG|KLKB1|KNG1|SERPINA1|PLAUR|PLG|PROC|PROS1|PROZ|ADAMTS13	-0.93
GO Biological Processes	GO:0007596	blood coagulation	-2.9	CD36|MAPK14|F2|F5|F13B|FGA|FGB|FGG|FN1|GNAS|HGFAC|HNF4A|HRG|KLKB1|KNG1|SERPINA1|PLAUR|PLG|PROC|PROS1|PROZ|ADAMTS13	-0.93
GO Biological Processes	GO:1901799	negative regulation of proteasomal protein catabolic process	-2.9	CAMLG|TAF9|USP7|PSMF1|USP19|TLK2|PARK7|USP25|UCHL5|MARCHF7	-0.93
GO Biological Processes	GO:0016064	immunoglobulin mediated immune response	-2.9	C3|C4A|C4BPA|C5|C6|C8B|C9|CD74|CLU|HLA-DRA|CFI|MBL2|MASP2|C1RL	-0.93
GO Biological Processes	GO:1903034	regulation of response to wounding	-2.9	APOE|CD36|CRK|F2|FGA|FGB|FGG|HRG|KLKB1|KNG1|PLAUR|PLG|PROC|PROS1|SRSF6|ST3GAL4|TNFAIP3|VTN|XBP1|STK24|CERS2	-0.92
GO Biological Processes	GO:0033559	unsaturated fatty acid metabolic process	-2.9	ACOX1|CBR1|CD74|CYP1A1|CYP1A2|CYP2C18|GPX4|GSTM1|HPGD|CYP4F3|SCP2|FADS2|DECR2	-0.91
GO Biological Processes	GO:0019217	regulation of fatty acid metabolic process	-2.9	ACADVL|AKT2|APOA1|APOC1|APOC3|CD74|PDK2|PPARA|PLA2G3|MLXIPL|DGAT2|MFSD2A|SLC45A3	-0.91
GO Biological Processes	GO:1901616	organic hydroxy compound catabolic process	-2.8	ADH4|APOE|SCARB1|GK|CYP4F3|MAOA|MAOB|SORD|SULT1E1|SULT1A1|LDHD|GK5	-0.91
GO Biological Processes	GO:0009117	nucleotide metabolic process	-2.8	ADK|ATP5F1D|ATP5MC3|DPYD|SLC26A2|TYMP|ACSL1|ACSL4|GCDH|HSD17B4|NDUFA3|NDUFA9|NDUFB6|NDUFS4|NDUFS8|PNP|NT5E|PFKFB1|PRPSAP2|SDHC|SULT1E1|SULT1A1|TDO2|TK2|KMO|SUCLG2|SUCLG1|KYNU|ENTPD4|AASS|NME6|PARK7|HAAO|PIPOX|RAB23|PANK1|NMRK1|ACSM5|NAXD|OGDHL|NEIL1|ADPGK|DGAT2|AFMID|UPP2|NUDT7	-0.91
GO Biological Processes	GO:0042851	L-alanine metabolic process	-2.8	AGXT|GPT|AGXT2	-0.91
GO Biological Processes	GO:0019557	histidine catabolic process to glutamate and formate	-2.8	HAL|FTCD|AMDHD1	-0.91
GO Biological Processes	GO:0010903	negative regulation of very-low-density lipoprotein particle remodeling	-2.8	APOA1|APOC3|NR1H4	-0.91
GO Biological Processes	GO:0019556	histidine catabolic process to glutamate and formamide	-2.8	HAL|FTCD|AMDHD1	-0.91
GO Biological Processes	GO:0006526	arginine biosynthetic process	-2.8	ASL|ASS1|OTC	-0.91
GO Biological Processes	GO:0010901	regulation of very-low-density lipoprotein particle remodeling	-2.8	APOA1|APOC3|NR1H4	-0.91
GO Biological Processes	GO:0046874	quinolinate metabolic process	-2.8	KMO|KYNU|HAAO	-0.91
GO Biological Processes	GO:0042853	L-alanine catabolic process	-2.8	AGXT|GPT|AGXT2	-0.91
GO Biological Processes	GO:0043606	formamide metabolic process	-2.8	HAL|FTCD|AMDHD1	-0.91
GO Biological Processes	GO:0006749	glutathione metabolic process	-2.8	GGT1|GPX4|GSTA2|GSTA4|GSTM1|GSTZ1|HAGH|SLC1A2|PARK7|ETHE1	-0.89
GO Biological Processes	GO:0006548	histidine catabolic process	-2.8	HAL|HNMT|FTCD|AMDHD1	-0.89
GO Biological Processes	GO:0075294	positive regulation by symbiont of entry into host	-2.8	CD74|LGALS1|LGALS9|P4HB	-0.89
GO Biological Processes	GO:0046598	positive regulation of viral entry into host cell	-2.8	CD74|LGALS1|LGALS9|P4HB	-0.89
GO Biological Processes	GO:0051004	regulation of lipoprotein lipase activity	-2.8	APOA1|APOC1|APOC3|ANGPTL3|ABHD5	-0.87
GO Biological Processes	GO:0009084	glutamine family amino acid biosynthetic process	-2.8	ASL|ASS1|GLUD1|OTC|GLS2	-0.87
GO Biological Processes	GO:0043604	amide biosynthetic process	-2.8	ARG1|ASL|ASS1|CPS1|DHPS|EIF2S3|EIF4A1|EIF4G1|EIF4G2|CLN8|ACSL1|ACSL4|GCDH|GGT1|HAGH|EIF3E|OTC|PAM|RPL9|RPL10|RPL12|RPL22|RPL34|RPS11|RPS16|RPS18|RPS24|RPS25|ST3GAL1|SLC1A2|EIF4G3|GAL3ST1|SLC25A15|PEMT|CPEB3|MRPS18B|MRPL13|CERS2|ST6GALNAC6|MTRES1|AURKAIP1|SMPD4|BDH2|MRPS14|MRPS24|MRPL11|MRPL1|ASCC2|MRPL52|RPL22L1	-0.87
GO Biological Processes	GO:0006760	folic acid-containing compound metabolic process	-2.8	GCH1|MTRR|SLC19A1|MTHFS|ALDH1L1|FTCD|SLC25A32	-0.87
GO Biological Processes	GO:0042743	hydrogen peroxide metabolic process	-2.8	ACOX1|CYP1A1|CYP1A2|GPX3|MAOB|PARK7|PRDX5	-0.87
GO Biological Processes	GO:0019724	B cell mediated immunity	-2.8	C3|C4A|C4BPA|C5|C6|C8B|C9|CD74|CLU|HLA-DRA|CFI|MBL2|MASP2|C1RL	-0.87
GO Biological Processes	GO:0008202	steroid metabolic process	-2.7	APOA1|APOE|SERPINA6|CBR1|SCARB1|CYP1A1|CYP1A2|CLN8|FDPS|NR5A2|GC|HSD17B4|LIPA|LIPC|NFE2L1|PON1|SCP2|SULT1E1|SULT1A1|NR1H4|ANGPTL3|HSD3B7|OSBPL1A|OSBPL5|OSBPL9	-0.84
GO Biological Processes	GO:0031348	negative regulation of defense response	-2.7	A2M|APOA1|APOE|ARG1|ARRB2|CRK|MAPK14|IFI16|IGF1|LGALS9|NT5E|PCBP2|PPARA|PPM1B|PROC|SEC14L1|TARBP2|TNFAIP3|NR1H4|RABGEF1|RNF125|ASH1L|ILRUN|SHARPIN|MACIR	-0.84
GO Biological Processes	GO:0042430	indole-containing compound metabolic process	-2.7	GCDH|TDO2|KMO|KYNU|HAAO|AFMID	-0.84
GO Biological Processes	GO:0048025	negative regulation of mRNA splicing, via spliceosome	-2.7	HNRNPA2B1|PTBP1|SRSF6|SFSWAP|RNPS1|PCBP4	-0.84
GO Biological Processes	GO:0006635	fatty acid beta-oxidation	-2.7	ACADVL|ACOX1|GCDH|HSD17B4|SCP2|ACOX2|ECI2|DECR2|ECHDC2|BDH2|ACAD11	-0.83
GO Biological Processes	GO:0072330	monocarboxylic acid biosynthetic process	-2.7	CBR1|CD74|CYP1A1|CYP1A2|GAMT|GPX4|GSTM1|LIPC|SCP2|XBP1|KMO|FADS2|QKI|PARK7|DECR2|ACSM5|HSD3B7|OSBPL1A|OSBPL9	-0.83
GO Biological Processes	GO:0031330	negative regulation of cellular catabolic process	-2.7	APOC1|APOC3|CAMLG|MAPK14|DHX9|EIF4G1|EIF4G2|FMR1|GOLGA2|GPLD1|HNRNPC|PTPN3|SNRNP70|TAF9|USP7|PSMF1|THRAP3|USP19|TLK2|PARK7|USP25|A1CF|ATRAID|UCHL5|PHAX|LAPTM4B|TENT4B|MARCHF7|MFSD2A	-0.83
GO Biological Processes	GO:0007599	hemostasis	-2.7	CD36|MAPK14|F2|F5|F13B|FGA|FGB|FGG|FN1|GNAS|HGFAC|HNF4A|HRG|KLKB1|KNG1|SERPINA1|PLAUR|PLG|PROC|PROS1|PROZ|ADAMTS13	-0.81
GO Biological Processes	GO:1905952	regulation of lipid localization	-2.7	AKT2|APOA1|APOC1|APOC3|APOE|C3|CD36|SCARB1|DAB2|ACSL1|ABCB4|PON1|PPARA|REN|SCP2|PLA2G3|ABHD5|PNPLA2|ABCG8|DENND5B	-0.81
GO Biological Processes	GO:0010828	positive regulation of glucose transmembrane transport	-2.7	AKT2|C3|MAPK14|IGF1|INSR|SLC1A2|CLTCL1|SORBS1	-0.78
GO Biological Processes	GO:0009069	serine family amino acid metabolic process	-2.7	AGXT|CDO1|GCSH|GGT1|RIDA|SEPHS1|SCLY|AGXT2	-0.78
GO Biological Processes	GO:0051180	vitamin transport	-2.7	APOA1|SCARB1|GC|SLC19A1|TCN2|SLC5A6|ABCC5|SLC25A32	-0.78
GO Biological Processes	GO:0050714	positive regulation of protein secretion	-2.6	ACSL4|FGA|FGB|FGG|GLUD1|GPLD1|IGF1|PSMD9|RBP4|ADAM9|C2CD2L|NR1H4|FRMD4A|EXOC1|LRRC8A|GOLPH3	-0.78
GO Biological Processes	GO:0034377	plasma lipoprotein particle assembly	-2.6	APOA1|APOC1|APOC3|APOE|MTTP|MFSD2A	-0.75
GO Biological Processes	GO:1902992	negative regulation of amyloid precursor protein catabolic process	-2.6	BIN1|APOE|CLU|IGF1|PICALM|RTN4	-0.75
GO Biological Processes	GO:0009435	NAD biosynthetic process	-2.6	KMO|KYNU|HAAO|NMRK1|NAXD|AFMID	-0.75
GO Biological Processes	GO:0052547	regulation of peptidase activity	-2.6	A2M|AHSG|AMBP|BIN1|ARRB2|C3|C4A|C5|SERPINA6|CTSH|FN1|HRG|IFI16|ITIH1|ITIH2|ITIH3|ITIH4|KNG1|LGALS9|SERPINA5|SERPINA1|PLAUR|POR|PROS1|PZP|VTN|PICALM|PDCD5|PSMF1|DELE1|CLPX|PARK7|GRAMD4|PRDX5|FETUB|UCHL5|CYCS|PIH1D1|RCN3	-0.74
GO Biological Processes	GO:0048259	regulation of receptor-mediated endocytosis	-2.6	APOC1|APOC3|ARRB2|C3|CLU|DAB2|FMR1|INSR|TF|VTN|PICALM|RABGEF1|SMAP1|RIN3|ATAD1	-0.74
GO Biological Processes	GO:0031639	plasminogen activation	-2.6	FGA|FGB|FGG|KLKB1	-0.71
GO Biological Processes	GO:0034454	microtubule anchoring at centrosome	-2.6	DCTN1|PCM1|NINL|HOOK3	-0.71
GO Biological Processes	GO:0006591	ornithine metabolic process	-2.6	ARG1|ASL|HNF4A|OTC	-0.71
GO Biological Processes	GO:0050686	negative regulation of mRNA processing	-2.6	CCNT1|HNRNPA2B1|PTBP1|SRSF6|SFSWAP|RNPS1|PCBP4	-0.71
GO Biological Processes	GO:0050691	regulation of defense response to virus by host	-2.6	DHX9|STAT1|TARBP2|TNFAIP3|ZDHHC1|TRIM44|MAVS	-0.71
GO Biological Processes	GO:0044242	cellular lipid catabolic process	-2.5	ACADVL|ACOX1|APOC3|CPS1|GCDH|HSD17B4|LIPC|PHYH|SCP2|ACOX2|ECI2|DECR2|ANGPTL3|GDE1|ECHDC2|SMPD4|GPCPD1|BDH2|PNPLA2|PLBD1|ACAD11|NUDT7	-0.7
GO Biological Processes	GO:0070936	protein K48-linked ubiquitination	-2.5	IFI27|TNFAIP3|UBE2B|UBE2D3|UBE2E1|UBE2G1|UBE2H|MARCHF6|UBE2E3|RNF126|HACE1	-0.68
GO Biological Processes	GO:0030301	cholesterol transport	-2.5	APOA1|APOC1|APOC3|APOE|CD36|SCARB1|CLU|LIPC|ABCG8|OSBPL5	-0.67
GO Biological Processes	GO:0048524	positive regulation of viral process	-2.5	CD74|DHX9|FMR1|NR5A2|LGALS1|LGALS9|P4HB|PPARA|RAD23A|TARBP2	-0.67
GO Biological Processes	GO:0033865	nucleoside bisphosphate metabolic process	-2.5	SLC26A2|ACSL1|ACSL4|GCDH|HSD17B4|SULT1E1|SULT1A1|TDO2|SUCLG2|SUCLG1|AASS|PIPOX|PANK1|ACSM5|DGAT2|NUDT7	-0.67
GO Biological Processes	GO:0034032	purine nucleoside bisphosphate metabolic process	-2.5	SLC26A2|ACSL1|ACSL4|GCDH|HSD17B4|SULT1E1|SULT1A1|TDO2|SUCLG2|SUCLG1|AASS|PIPOX|PANK1|ACSM5|DGAT2|NUDT7	-0.67
GO Biological Processes	GO:0033875	ribonucleoside bisphosphate metabolic process	-2.5	SLC26A2|ACSL1|ACSL4|GCDH|HSD17B4|SULT1E1|SULT1A1|TDO2|SUCLG2|SUCLG1|AASS|PIPOX|PANK1|ACSM5|DGAT2|NUDT7	-0.67
GO Biological Processes	GO:0060966	regulation of gene silencing by RNA	-2.5	DDX5|DHX9|EIF4G1|FMR1|TARBP2|FXR1|NCOR2|ZMPSTE24	-0.65
GO Biological Processes	GO:0042304	regulation of fatty acid biosynthetic process	-2.5	ACADVL|APOA1|APOC1|APOC3|CD74|PLA2G3|MLXIPL|SLC45A3	-0.65
GO Biological Processes	GO:0061136	regulation of proteasomal protein catabolic process	-2.5	APOE|CAMLG|CLU|DAB2|FMR1|PSMC3|RAD23A|SUMO2|TAF9|UBB|USP7|USP5|PSMF1|USP19|TLK2|PARK7|FBXW8|USP25|UCHL5|NUB1|COP1|MARCHF7|ZFAND2A	-0.65
GO Biological Processes	GO:0045722	positive regulation of gluconeogenesis	-2.5	GPT|PPARA|STK11|KAT2B|DGAT2	-0.65
GO Biological Processes	GO:0055089	fatty acid homeostasis	-2.5	APOE|XBP1|NR1H4|MLXIPL|DGAT2	-0.65
GO Biological Processes	GO:0110096	cellular response to aldehyde	-2.5	ADH4|ALDH1A1|ESD|PARK7|RDH11	-0.65
GO Biological Processes	GO:0033127	regulation of histone phosphorylation	-2.5	FMR1|MAPK3|UBE2B|AKAP8L|PPP4R2	-0.65
GO Biological Processes	GO:0046326	positive regulation of glucose import	-2.5	AKT2|MAPK14|IGF1|INSR|SLC1A2|CLTCL1|SORBS1	-0.65
GO Biological Processes	GO:0071108	protein K48-linked deubiquitination	-2.5	TNFAIP3|USP7|USP5|USP34|USP19|USP25|MINDY1	-0.65
GO Biological Processes	GO:0070873	regulation of glycogen metabolic process	-2.5	AKT2|GCGR|IGF1|INSR|KHK|PHKG2|SORBS1	-0.65
GO Biological Processes	GO:0009617	response to bacterium	-2.5	ARG1|ASS1|BNIP3|C3|C4BPA|CD1D|CD36|SCARB1|CPS1|MAPK14|CYP1A1|F2|FGA|FGB|FGFR2|GCH1|HPGD|IRAK2|LBP|LGALS9|MAOB|MBL2|NFIB|MAPK3|REN|SLC22A5|ADAM17|PPP1R11|TF|TNFAIP3|VCAM1|XBP1|KMO|ADAM9|NR1H4|ADAMTS13|CDK19|STAB1|ANKRD17|CYRIB|STAB2|MAVS|SHARPIN|MTDH	-0.65
GO Biological Processes	GO:0019441	tryptophan catabolic process to kynurenine	-2.4	TDO2|KYNU|AFMID	-0.65
GO Biological Processes	GO:0006572	tyrosine catabolic process	-2.4	GSTZ1|HPD|TAT	-0.65
GO Biological Processes	GO:0034372	very-low-density lipoprotein particle remodeling	-2.4	APOA1|APOE|LIPC	-0.65
GO Biological Processes	GO:0006524	alanine catabolic process	-2.4	AGXT|GPT|AGXT2	-0.65
GO Biological Processes	GO:0009078	pyruvate family amino acid metabolic process	-2.4	AGXT|GPT|AGXT2	-0.65
GO Biological Processes	GO:0009080	pyruvate family amino acid catabolic process	-2.4	AGXT|GPT|AGXT2	-0.65
GO Biological Processes	GO:0034384	high-density lipoprotein particle clearance	-2.4	APOA1|APOE|SCARB1	-0.65
GO Biological Processes	GO:0010891	negative regulation of sequestering of triglyceride	-2.4	PPARA|ABHD5|PNPLA2	-0.65
GO Biological Processes	GO:0006522	alanine metabolic process	-2.4	AGXT|GPT|AGXT2	-0.65
GO Biological Processes	GO:0070729	cyclic nucleotide transport	-2.4	SLC19A1|ABCC5|LRRC8A	-0.65
GO Biological Processes	GO:0046470	phosphatidylcholine metabolic process	-2.4	APOA1|CHKA|GPLD1|LIPC|PON1|PEMT|PLA2G3|CHPT1|ABHD4|MFSD2A	-0.65
GO Biological Processes	GO:0002449	lymphocyte mediated immunity	-2.4	C3|C4A|C4BPA|C5|C6|C8B|C9|CD74|CTSC|CLU|CTSH|HLA-DRA|CFI|MBL2|VAMP7|MASP2|C1RL	-0.64
GO Biological Processes	GO:0052548	regulation of endopeptidase activity	-2.4	A2M|AHSG|AMBP|BIN1|ARRB2|C3|C4A|C5|SERPINA6|CTSH|HRG|IFI16|ITIH1|ITIH2|ITIH3|ITIH4|KNG1|LGALS9|SERPINA5|SERPINA1|PLAUR|POR|PROS1|PZP|VTN|PICALM|PDCD5|PSMF1|DELE1|PARK7|GRAMD4|PRDX5|FETUB|UCHL5|CYCS|PIH1D1	-0.64
GO Biological Processes	GO:0046890	regulation of lipid biosynthetic process	-2.4	ACADVL|APOA1|APOC1|APOC3|APOE|C3|SCARB1|CD74|DAB2|GPLD1|POR|PPARA|NR1H4|SORBS1|SIRT3|PLA2G3|MLXIPL|DGAT2|MFSD2A|SLC45A3	-0.63
GO Biological Processes	GO:0010817	regulation of hormone levels	-2.4	ADH4|ADH6|ALDH1A1|ARNT|ARNTL|CYP1A1|CYP1A2|CYP2C18|DAB2|ACSL4|FGA|FGB|FGG|GHR|GLUD1|GPLD1|HNF4A|HPN|HSD17B4|IL1RN|SMAD2|CDK16|POR|PSMD9|RBP4|REN|SULT1E1|SULT1A1|VAMP7|DHRS3|CLOCK|C2CD2L|NR1H4|ZMPSTE24|PARK7|SLC39A14|PLA2G3|RDH11|DHRS7|LRRC8A|PNPLA2|DGAT2|SLC22A9	-0.63
GO Biological Processes	GO:0001676	long-chain fatty acid metabolic process	-2.4	CBR1|CYP1A1|CYP1A2|CYP2C18|ACSL1|ACSL4|GPX4|GSTM1|CYP4F3|PAM|SCP2|FADS2|QKI	-0.62
GO Biological Processes	GO:0071466	cellular response to xenobiotic stimulus	-2.4	CBR1|CRYZ|CYP1A1|CYP1A2|CYP2C18|ACSL1|FBP1|FMO4|GPLD1|GSTA2|GSTA4|GSTM1|HNF4A|POR|REN|SULT1A1|UGT1A6	-0.61
GO Biological Processes	GO:0031056	regulation of histone modification	-2.4	FMR1|PHF1|MAPK3|SUPT6H|UBE2B|TRIP12|AASS|ZMPSTE24|PARK7|SF3B1|ZZZ3|AUTS2|CHTOP|AKAP8L|MBIP|BCOR|NSD3|PIH1D1|NSD1|PYGO2|TADA2B|PPP4R2	-0.6
GO Biological Processes	GO:0019363	pyridine nucleotide biosynthetic process	-2.4	KMO|KYNU|HAAO|NMRK1|NAXD|AFMID	-0.6
GO Biological Processes	GO:0033344	cholesterol efflux	-2.4	APOA1|APOC1|APOC3|APOE|SCARB1|ABCG8	-0.6
GO Biological Processes	GO:0019359	nicotinamide nucleotide biosynthetic process	-2.4	KMO|KYNU|HAAO|NMRK1|NAXD|AFMID	-0.6
GO Biological Processes	GO:0033700	phospholipid efflux	-2.4	APOA1|APOC1|APOC3|APOE	-0.6
GO Biological Processes	GO:0033540	fatty acid beta-oxidation using acyl-CoA oxidase	-2.4	ACOX1|SCP2|ACOX2|DECR2	-0.6
GO Biological Processes	GO:0071377	cellular response to glucagon stimulus	-2.4	ARG1|ASS1|CPS1|GCGR	-0.6
GO Biological Processes	GO:0034379	very-low-density lipoprotein particle assembly	-2.4	APOC1|APOC3|MTTP|MFSD2A	-0.6
GO Biological Processes	GO:0019835	cytolysis	-2.4	C5|C6|C8B|C9	-0.6
GO Biological Processes	GO:0006547	histidine metabolic process	-2.4	HAL|HNMT|FTCD|AMDHD1	-0.6
GO Biological Processes	GO:0050665	hydrogen peroxide biosynthetic process	-2.4	ACOX1|CYP1A1|CYP1A2|MAOB	-0.6
GO Biological Processes	GO:0045725	positive regulation of glycogen biosynthetic process	-2.4	AKT2|IGF1|INSR|SORBS1	-0.6
GO Biological Processes	GO:0009062	fatty acid catabolic process	-2.4	ACADVL|ACOX1|GCDH|HSD17B4|PHYH|SCP2|ACOX2|ECI2|DECR2|ECHDC2|BDH2|ACAD11|NUDT7	-0.6
GO Biological Processes	GO:0050727	regulation of inflammatory response	-2.4	AHSG|APOA1|APOE|C3|CD47|CTSC|MAPK14|DHX9|GGT1|GPX4|IGF1|IL6ST|KLKB1|LBP|LGALS1|NT5E|PPARA|PROC|VAMP7|TNFAIP3|CLOCK|NR1H4|CELF1|PARK7|CDK19|RABGEF1|PLA2G3|ASH1L|SETD6|SHARPIN|MACIR|PIK3AP1	-0.6
GO Biological Processes	GO:0002443	leukocyte mediated immunity	-2.4	C3|C4A|C4BPA|C5|C6|C8B|C9|CD74|CTSC|CLU|CTSH|F2|HLA-DRA|CFI|MBL2|VAMP7|ADAM17|MASP2|PLA2G3|C1RL	-0.6
GO Biological Processes	GO:0042180	cellular ketone metabolic process	-2.3	ADH4|CBR1|KYAT1|HAGH|CYP4F3|NDUFA9|TDO2|KMO|KYNU|PARK7|AFMID	-0.59
GO Biological Processes	GO:0051222	positive regulation of protein transport	-2.3	AKT2|MAPK14|ACSL4|FGA|FGB|FGG|GLUD1|GPLD1|IGF1|JUP|OAZ1|PCM1|PSMD9|RBP4|UBE2D3|ADAM9|ZPR1|PDCD5|ITGB1BP1|C2CD2L|NR1H4|SAE1|FRMD4A|EXOC1|DMAP1|LRRC8A|MFF|MAVS|GOLPH3|RIPOR1	-0.58
GO Biological Processes	GO:0000097	sulfur amino acid biosynthetic process	-2.3	BHMT|CDO1|GGT1|MTRR|BHMT2	-0.57
GO Biological Processes	GO:0042759	long-chain fatty acid biosynthetic process	-2.3	CYP1A1|CYP1A2|GPX4|GSTM1|QKI	-0.57
GO Biological Processes	GO:1903902	positive regulation of viral life cycle	-2.3	CD74|FMR1|LGALS1|LGALS9|P4HB	-0.57
GO Biological Processes	GO:0019400	alditol metabolic process	-2.3	GK|SORD|ANGPTL3|DGAT2|GK5	-0.57
GO Biological Processes	GO:1903363	negative regulation of cellular protein catabolic process	-2.3	CAMLG|TAF9|USP7|PSMF1|USP19|TLK2|PARK7|USP25|ATRAID|UCHL5|LAPTM4B|MARCHF7	-0.57
GO Biological Processes	GO:0002832	negative regulation of response to biotic stimulus	-2.3	A2M|ARG1|ARRB2|CRK|IFI16|LGALS9|PCBP2|PPM1B|SEC14L1|TARBP2|TNFAIP3|RNF125|ILRUN	-0.57
GO Biological Processes	GO:0120009	intermembrane lipid transfer	-2.3	APOA1|APOE|MTTP|C2CD2L|PRELID3A|PRELID3B|PITPNM2|ABCG8|OSBPL5	-0.56
GO Biological Processes	GO:0046942	carboxylic acid transport	-2.3	AGXT|CD36|SLC26A2|CLN8|ABCB4|SLC1A2|SLC7A2|SLC19A1|SLCO2A1|SLCO1A2|SLC5A6|SLC22A6|SLC17A4|ABCC5|SLC25A15|SLC38A3|PLA2G3|SLC47A1|LRRC8A|SLC25A32|SFXN1|SLC22A9|SLC26A8|SLC36A4	-0.55
GO Biological Processes	GO:0006690	icosanoid metabolic process	-2.3	ACOX1|CBR1|CD74|CYP1A1|CYP1A2|CYP2C18|GGT1|GPX4|GSTM1|HPGD|CYP4F3|PLA2G3	-0.53
GO Biological Processes	GO:0031365	N-terminal protein amino acid modification	-2.3	PPM1B|KAT2B|NMT2|NAA20|NAA35|NAA60	-0.53
GO Biological Processes	GO:0009162	deoxyribonucleoside monophosphate metabolic process	-2.3	ADK|DPYD|TYMP|PNP|TK2|UPP2	-0.53
GO Biological Processes	GO:0050687	negative regulation of defense response to virus	-2.3	PCBP2|PPM1B|SEC14L1|TARBP2|RNF125|ILRUN	-0.53
GO Biological Processes	GO:0060759	regulation of response to cytokine stimulus	-2.3	TLE5|APOA1|ARG1|CD74|DHX9|HPX|IL1RN|IRAK2|ADAM17|TAF9|TNFAIP3|NR1H4|AGPAT2|LSM14A|RABGEF1|TRIM44|MAVS|SHARPIN	-0.53
GO Biological Processes	GO:0006979	response to oxidative stress	-2.3	APOE|ARG1|ARNT|ARNTL|BNIP3|CD36|CRK|CLN8|GPX3|GPX4|HYAL1|MBL2|HNRNPM|NDUFS8|NFE2L1|PDK2|PON2|MAPK3|STAT1|TAT|TNFAIP3|TPM1|STK24|ADAM9|SGK2|NET1|STK25|RGS14|RBPMS|PARK7|PRDX5|OSER1|ADPRS|ALS2|NEIL1|AGAP3	-0.51
GO Biological Processes	GO:0006954	inflammatory response	-2.2	A2M|AHSG|ASS1|C3|C4A|C5|CD36|CDO1|CLU|DHX9|F2|FN1|NDST1|HYAL1|IFI16|IL1RAP|IL1RN|IRAK2|ITGAL|ITIH4|KLKB1|KNG1|LBP|LGALS9|LIPA|MBL2|CIITA|ORM1|SERPINA1|TNFAIP3|VCAM1|NR1H4|HDAC5|PARK7|STAB1|PLD3|PRDX5|PLA2G3|MACIR	-0.51
GO Biological Processes	GO:0048260	positive regulation of receptor-mediated endocytosis	-2.2	ARRB2|C3|CLU|DAB2|FMR1|INSR|TF|VTN|ATAD1	-0.51
GO Biological Processes	GO:1902430	negative regulation of amyloid-beta formation	-2.2	BIN1|APOE|CLU|IGF1|RTN4	-0.48
GO Biological Processes	GO:0045723	positive regulation of fatty acid biosynthetic process	-2.2	APOA1|CD74|PLA2G3|MLXIPL|SLC45A3	-0.48
GO Biological Processes	GO:0009125	nucleoside monophosphate catabolic process	-2.2	DPYD|TYMP|PNP|NT5E|UPP2	-0.48
GO Biological Processes	GO:0072524	pyridine-containing compound metabolic process	-2.2	PNP|KMO|KYNU|HAAO|NMRK1|NAXD|AFMID	-0.48
GO Biological Processes	GO:0045923	positive regulation of fatty acid metabolic process	-2.2	AKT2|APOA1|CD74|PPARA|PLA2G3|MLXIPL|SLC45A3	-0.48
GO Biological Processes	GO:0006368	transcription elongation from RNA polymerase II promoter	-2.2	GTF2F1|POLR2I|SUPT6H|TCEA1|ELL2|ENY2|ELOF1	-0.48
GO Biological Processes	GO:0072393	microtubule anchoring at microtubule organizing center	-2.2	DCTN1|PCM1|NINL|HOOK3	-0.48
GO Biological Processes	GO:0034975	protein folding in endoplasmic reticulum	-2.2	P4HB|DNAJC3|HSP90B1|ERO1B	-0.48
GO Biological Processes	GO:0043252	sodium-independent organic anion transport	-2.2	SLCO2A1|SLCO1A2|SLC22A6|SLC22A9	-0.48
GO Biological Processes	GO:0002697	regulation of immune effector process	-2.2	A2M|APOA1|ARG1|ARRB2|C3|C4BPA|CD1D|CD36|CD47|CD74|CRK|CFH|HLA-DRA|HPX|LBP|LGALS9|MBL2|PKN1|RBP4|SUPT6H|VAMP7|XBP1|PARP3|CADM1|ANKRD17|RABGEF1|PLA2G3|CYRIB|MAVS|COLEC11	-0.47
GO Biological Processes	GO:0006826	iron ion transport	-2.2	CP|FTH1|HPX|HRG|TF|ABCC5|SLC39A14|STEAP3|SFXN1	-0.47
GO Biological Processes	GO:0019080	viral gene expression	-2.2	DHX9|MGAT1|PCBP2|PTBP1|ST3GAL1|ST3GAL4|ST6GALNAC2|SPCS1|SHFL	-0.47
GO Biological Processes	GO:1901264	carbohydrate derivative transport	-2.2	SCARB1|CD47|SLC29A1|SLC37A4|LBP|SLC19A1|ABCC5|SLC35A1|SLC35C2|LRRC8A|MFSD2A	-0.47
GO Biological Processes	GO:1903362	regulation of cellular protein catabolic process	-2.2	APOE|CAMLG|CTSC|CLU|DAB2|FMR1|PSMC3|RAD23A|SUMO2|TAF9|TNFAIP3|UBB|USP7|USP5|PSMF1|USP19|TLK2|PARK7|FBXW8|USP25|ATRAID|UCHL5|NUB1|LAPTM4B|COP1|MARCHF7|RNF128|ZFAND2A	-0.47
GO Biological Processes	GO:0051702	biological process involved in interaction with symbiont	-2.2	APOE|CCNT1|F2|FMR1|FN1|HPN|HRG|IFI27|MBL2|PLG|PSMC3|TMEM41B	-0.47
GO Biological Processes	GO:2001268	negative regulation of cysteine-type endopeptidase activity involved in apoptotic signaling pathway	-2.2	PLAUR|PARK7|PIH1D1	-0.47
GO Biological Processes	GO:0051005	negative regulation of lipoprotein lipase activity	-2.2	APOC1|APOC3|ANGPTL3	-0.47
GO Biological Processes	GO:2000794	regulation of epithelial cell proliferation involved in lung morphogenesis	-2.2	FGFR2|NFIB|SRSF6	-0.47
GO Biological Processes	GO:1901289	succinyl-CoA catabolic process	-2.2	SUCLG2|SUCLG1|NUDT7	-0.47
GO Biological Processes	GO:1990743	protein sialylation	-2.2	ST3GAL1|ST3GAL4|ST6GALNAC2	-0.47
GO Biological Processes	GO:0035356	cellular triglyceride homeostasis	-2.2	XBP1|NR1H4|DGAT2	-0.47
GO Biological Processes	GO:0001408	guanine nucleotide transport	-2.2	SLC19A1|ABCC5|LRRC8A	-0.47
GO Biological Processes	GO:0034370	triglyceride-rich lipoprotein particle remodeling	-2.2	APOA1|APOE|LIPC	-0.47
GO Biological Processes	GO:0019405	alditol catabolic process	-2.2	GK|SORD|GK5	-0.47
GO Biological Processes	GO:0070508	cholesterol import	-2.2	APOA1|CD36|SCARB1	-0.47
GO Biological Processes	GO:2000618	regulation of histone H4-K16 acetylation	-2.2	ZMPSTE24|AUTS2|PIH1D1	-0.47
GO Biological Processes	GO:0000395	mRNA 5'-splice site recognition	-2.2	SFSWAP|SNRPC|PRPF39	-0.47
GO Biological Processes	GO:0035694	mitochondrial protein catabolic process	-2.2	BNIP3|YME1L1|PISD	-0.47
GO Biological Processes	GO:0051604	protein maturation	-2.2	CTSH|DHPS|FGA|FGB|FGG|GCSH|GGT1|HGFAC|IFI16|KLKB1|MME|REN|ADAM17|KAT2B|RCE1|ZMPSTE24|YME1L1|ADAMTS13|SEC11A|PISD|SPCS1|NAA20|C1RL|CYCS|NAA35|NAA60|SEC11C	-0.47
GO Biological Processes	GO:0046486	glycerolipid metabolic process	-2.1	APOA1|APOC1|APOC3|APOE|CHKA|CPS1|ACSL1|GK|GPLD1|LIPC|MTTP|PON1|GAL3ST1|PEMT|AGPAT2|PIP5K1C|PISD|PLA2G3|ABHD5|IP6K2|GDE1|PIGX|SMPD4|GPCPD1|CHPT1|PNPLA2|PITPNM2|ABHD4|MTMR14|DGAT2|MFSD2A|OSBPL5|OSBPL10|GK5	-0.45
GO Biological Processes	GO:0060964	regulation of miRNA-mediated gene silencing	-2.1	DDX5|DHX9|EIF4G1|FMR1|FXR1|NCOR2|ZMPSTE24	-0.43
GO Biological Processes	GO:0042558	pteridine-containing compound metabolic process	-2.1	GCH1|MTRR|SLC19A1|MTHFS|ALDH1L1|FTCD|SLC25A32	-0.43
GO Biological Processes	GO:0009116	nucleoside metabolic process	-2.1	ADK|DPYD|TYMP|PNP|NT5E|TK2|GNMT|UPP2	-0.42
GO Biological Processes	GO:0015931	nucleobase-containing compound transport	-2.1	CD47|DHX9|SLC29A1|FMR1|HNRNPA1|HNRNPA2B1|SLC19A1|SUPT6H|THOC5|QKI|G3BP2|ABCC5|ALYREF|NXF1|SLC35A1|CHTOP|SLC35C2|PHAX|LRRC8A|ENY2|SLC25A32|HNRNPA3	-0.42
GO Biological Processes	GO:0050792	regulation of viral process	-2.1	CD74|DHX9|FMR1|NR5A2|IFI16|LGALS1|LGALS9|MBL2|CIITA|P4HB|PPARA|RAD23A|STAT1|TARBP2|SHFL|MAVS	-0.42
GO Biological Processes	GO:0046887	positive regulation of hormone secretion	-2.1	DAB2|ACSL4|FGA|FGB|FGG|GLUD1|GPLD1|PSMD9|RBP4|VAMP7|C2CD2L|NR1H4|PLA2G3|LRRC8A	-0.41
GO Biological Processes	GO:0034656	nucleobase-containing small molecule catabolic process	-2.1	DPYD|MGAT1|PNP|ENTPD4|UPP2	-0.41
GO Biological Processes	GO:0008210	estrogen metabolic process	-2.1	CYP1A1|CYP1A2|HSD17B4|SULT1E1|SULT1A1	-0.41
GO Biological Processes	GO:0010866	regulation of triglyceride biosynthetic process	-2.1	C3|SCARB1|GPLD1|DGAT2|MFSD2A	-0.41
GO Biological Processes	GO:0071375	cellular response to peptide hormone stimulus	-2.1	AKT2|ARG1|ASS1|AP3S1|CPS1|CRK|FBP1|GCGR|GHR|GPLD1|GPT|INSR|PDK2|POR|SRSF5|STAT1|XBP1|KAT2B|HDAC5|SORBS1|RAB10|SLC39A14|SLC30A10|AGTRAP|ZNF106	-0.41
GO Biological Processes	GO:0009895	negative regulation of catabolic process	-2.1	APOC1|APOC3|CAMLG|MAPK14|DHX9|EIF4G1|EIF4G2|FBP1|FMR1|GOLGA2|GPLD1|HNRNPC|PPARA|PTPN3|SNRNP70|TAF9|USP7|PSMF1|THRAP3|USP19|TLK2|PARK7|USP25|A1CF|ATRAID|UCHL5|PHAX|LAPTM4B|TENT4B|MARCHF7|RILP|MFSD2A	-0.41
GO Biological Processes	GO:0072525	pyridine-containing compound biosynthetic process	-2.1	KMO|KYNU|HAAO|NMRK1|NAXD|AFMID	-0.41
GO Biological Processes	GO:0050996	positive regulation of lipid catabolic process	-2.1	AKT2|APOA1|PPARA|ANGPTL3|ABHD5|PNPLA2	-0.41
GO Biological Processes	GO:0042219	cellular modified amino acid catabolic process	-2.1	BHMT|GGT1|ALDH4A1|MTHFS|ALDH1L1|PCYOX1	-0.41
GO Biological Processes	GO:0019362	pyridine nucleotide metabolic process	-2.1	KMO|KYNU|HAAO|NMRK1|NAXD|AFMID	-0.41
GO Biological Processes	GO:0046496	nicotinamide nucleotide metabolic process	-2.1	KMO|KYNU|HAAO|NMRK1|NAXD|AFMID	-0.41
GO Biological Processes	GO:0098869	cellular oxidant detoxification	-2.1	ALB|APOE|GPX3|GPX4|GSTZ1|TXNRD1|PARK7|PRDX5|PRXL2A|TXNDC17|PRXL2C	-0.4
GO Biological Processes	GO:0046434	organophosphate catabolic process	-2.1	DPYD|TYMP|LIPC|PNP|NT5E|PON1|SUCLG2|SUCLG1|ENTPD4|ANGPTL3|GDE1|SMPD4|GPCPD1|NEIL1|PLBD1|UPP2|NUDT7|ENTPD8	-0.39
GO Biological Processes	GO:0034404	nucleobase-containing small molecule biosynthetic process	-2	ADK|PNP|NT5E|TK2	-0.39
GO Biological Processes	GO:0070365	hepatocyte differentiation	-2	CPS1|CYP1A1|HNF4A|TAF10	-0.39
GO Biological Processes	GO:0006570	tyrosine metabolic process	-2	GSTZ1|HPD|PAH|TAT	-0.39
GO Biological Processes	GO:0051044	positive regulation of membrane protein ectodomain proteolysis	-2	APOE|GPLD1|ADAM9|PACSIN3	-0.39
GO Biological Processes	GO:0034383	low-density lipoprotein particle clearance	-2	CD36|SCARB1|LIPA|DGAT2	-0.39
GO Biological Processes	GO:0010867	positive regulation of triglyceride biosynthetic process	-2	SCARB1|GPLD1|DGAT2|MFSD2A	-0.39
GO Biological Processes	GO:0006000	fructose metabolic process	-2	FBP1|KHK|PFKFB1|SORD	-0.39
GO Biological Processes	GO:0006474	N-terminal protein amino acid acetylation	-2	KAT2B|NAA20|NAA35|NAA60	-0.39
GO Biological Processes	GO:0009163	nucleoside biosynthetic process	-2	ADK|PNP|NT5E|TK2	-0.39
GO Biological Processes	GO:0009071	serine family amino acid catabolic process	-2	AGXT|CDO1|GCSH|SCLY	-0.39
GO Biological Processes	GO:0051918	negative regulation of fibrinolysis	-2	F2|HRG|PLG|VTN	-0.39
GO Biological Processes	GO:0034374	low-density lipoprotein particle remodeling	-2	APOE|LIPC|MTTP|PLA2G3	-0.39
GO Biological Processes	GO:0006778	porphyrin-containing compound metabolic process	-2	AMBP|CYP1A1|CYP1A2|HPX|NFE2L1|PPOX|TMEM14C|BDH2	-0.38
GO Biological Processes	GO:0016485	protein processing	-2	CTSH|FGA|FGB|FGG|GGT1|HGFAC|IFI16|KLKB1|MME|REN|ADAM17|RCE1|ZMPSTE24|YME1L1|ADAMTS13|SEC11A|PISD|SPCS1|C1RL|CYCS|SEC11C	-0.38
GO Biological Processes	GO:0006835	dicarboxylic acid transport	-2	AGXT|SLC26A2|CLN8|SLC1A2|SLC19A1|SLC22A6|ABCC5|LRRC8A|SLC25A32|SLC26A8	-0.38
GO Biological Processes	GO:0043966	histone H3 acetylation	-2	ATXN7|TAF9|TAF10|KAT2B|ZZZ3|MBIP|SUPT20H|ENY2|NAA60|TADA2B	-0.38
GO Biological Processes	GO:0032868	response to insulin	-2	AKT2|AP3S1|MAPK14|FBP1|GHR|GPLD1|GPT|INSR|KHK|OTC|PDK2|PFKFB1|PPARA|SRSF5|SRSF6|STAT1|XBP1|KAT2B|HDAC5|SORBS1|RAB10|SLC39A14|ZNF106	-0.38
GO Biological Processes	GO:0002460	adaptive immune response based on somatic recombination of immune receptors built from immunoglobulin superfamily domains	-2	C3|C4A|C4BPA|C5|C6|C8B|C9|CD74|CTSC|CLU|CTSH|HLA-DRA|CFI|MBL2|ADAM17|MASP2|C1RL	-0.38
GO Biological Processes	GO:0034250	positive regulation of cellular amide metabolic process	-2	CLU|DHX9|EIF2S3|EIF4G1|EIF4G2|FMR1|EIF3E|DNAJC3|TARBP2|FXR1|PICALM|CDC123|CPEB3|SIRT3|TRUB2|NSUN5|TENT4B|JMJD4	-0.38
GO Biological Processes	GO:0006081	cellular aldehyde metabolic process	-2	ADH4|AGXT|ALDH1A1|ESD|HAGH|PARK7|RDH11|AGXT2|HYI	-0.35
GO Biological Processes	GO:0060760	positive regulation of response to cytokine stimulus	-2	CD74|DHX9|HPX|ADAM17|TAF9|AGPAT2|LSM14A|TRIM44|MAVS	-0.35
GO Cellular Components	GO:0072562	blood microparticle	-15	A2M|AHSG|ALB|AMBP|APOA1|APOE|CFB|C3|C4A|C4BPA|C9|CLU|CP|F2|FGA|FGB|FGG|FN1|GC|CFH|HPX|HRG|ITIH1|ITIH2|ITIH4|KNG1|ORM1|PLG|PON1|PROS1|PZP|TF|VTN|C1RL	-11
GO Cellular Components	GO:0031093	platelet alpha granule lumen	-7.5	A2M|AHSG|ALB|CLU|F5|FGA|FGB|FGG|FN1|HRG|IGF1|KNG1|ORM1|SERPINA1|PLG|PROS1|VEGFB|CYRIB|APOOL	-4.5
GO Cellular Components	GO:0031091	platelet alpha granule	-7.1	A2M|AHSG|ALB|CD36|CLU|F5|FGA|FGB|FGG|FN1|HRG|IGF1|KNG1|ORM1|SERPINA5|SERPINA1|PLG|PROS1|VAMP7|VEGFB|CYRIB|APOOL	-4.1
GO Cellular Components	GO:1905368	peptidase complex	-5.8	CFH|MBL2|PLAUR|PSMA2|PSMB3|PSMC3|PSMD1|PSMD9|RAD23A|ATXN7|TAF9|TAF10|KAT2B|PSMF1|SEC11A|SPCS1|UCHL5|SUPT20H|ENY2|COLEC11|ZFAND2A|SEC11C|TADA2B	-3.1
GO Cellular Components	GO:0005788	endoplasmic reticulum lumen	-5.4	AHSG|ALB|APOA1|APOE|C3|C4A|CTSC|CLU|COL13A1|CP|ESD|F2|F5|FGA|FGG|FN1|ITIH2|KNG1|LGALS1|LIPC|MTTP|P4HB|SERPINA1|PLAUR|MAPK3|DNAJC3|PROC|RCN2|ADAM17|TF|HSP90B1|PROZ|CNPY3|ADAMTS13|ERP44|FKBP7|UGGT1|FAM20C|PNPLA2|RCN3|COL18A1|MIA3	-2.8
GO Cellular Components	GO:0071004	U2-type prespliceosome	-5.2	SNRNP70|SNRPC|SF3B1|LUC7L2|LUC7L3|PRPF39|PRPF40A|LUC7L	-2.6
GO Cellular Components	GO:0071010	prespliceosome	-5.2	SNRNP70|SNRPC|SF3B1|LUC7L2|LUC7L3|PRPF39|PRPF40A|LUC7L	-2.6
GO Cellular Components	GO:0032994	protein-lipid complex	-4.6	BIN1|APOA1|APOC1|APOC3|APOE|CLU|LIPC|PON1|PCYOX1|LSR	-2.2
GO Cellular Components	GO:0034774	secretory granule lumen	-4.6	A2M|AHSG|ALB|APOA1|ARG1|C3|CTSC|CLU|MAPK14|CTSH|F5|FGA|FGB|FGG|FN1|HRG|IGF1|ITIH3|ITIH4|JUP|KNG1|PNP|ORM1|SERPINA1|PLG|DNAJC3|PROS1|PSMA2|PSMC3|PSMD1|TF|VEGFB|FAM3C|ERP44|ARHGAP45|CYRIB|CDC37L1|NIT2|C1orf35|APOOL	-2.1
GO Cellular Components	GO:0060205	cytoplasmic vesicle lumen	-4.5	A2M|AHSG|ALB|APOA1|ARG1|C3|CTSC|CLU|MAPK14|CTSH|F5|FGA|FGB|FGG|FN1|HRG|IGF1|ITIH3|ITIH4|JUP|KNG1|PNP|ORM1|SERPINA1|PLG|DNAJC3|PROS1|PSMA2|PSMC3|PSMD1|TF|VEGFB|FAM3C|ERP44|ARHGAP45|CYRIB|CDC37L1|NIT2|C1orf35|APOOL	-2.1
GO Cellular Components	GO:0031983	vesicle lumen	-4.4	A2M|AHSG|ALB|APOA1|ARG1|C3|CTSC|CLU|MAPK14|CTSH|F5|FGA|FGB|FGG|FN1|HRG|IGF1|ITIH3|ITIH4|JUP|KNG1|PNP|ORM1|SERPINA1|PLG|DNAJC3|PROS1|PSMA2|PSMC3|PSMD1|TF|VEGFB|FAM3C|ERP44|ARHGAP45|CYRIB|CDC37L1|NIT2|C1orf35|APOOL	-2.1
GO Cellular Components	GO:0005740	mitochondrial envelope	-4.4	ACADVL|AMBP|ARG1|ASS1|ATP5F1D|ATP5MC3|BNIP3|CLU|CPS1|CYB5A|CYP1A1|ACSL1|ACSL4|NIPSNAP2|GK|IFI27|NBR1|MAOA|MAOB|NDUFA3|NDUFA9|NDUFB6|NDUFS4|NDUFS8|OTC|PPOX|SDHC|SORD|UBB|UBC|UQCRH|KMO|TMEM11|DELE1|SLC25A15|PEMT|PRELID3A|MTX2|YME1L1|CLPX|PARK7|SPART|GRAMD4|NNT|PISD|HIGD1A|MRPS18B|MRPL13|DNAJC15|PRELID3B|TMEM14C|ARMCX3|CYCS|TTC19|CHCHD3|AURKAIP1|FOXRED1|MFF|MAVS|SQOR|MRPS14|GOLPH3|MRPS24|MRPL11|MRPL…	-2
GO Cellular Components	GO:0034358	plasma lipoprotein particle	-4.2	APOA1|APOC1|APOC3|APOE|CLU|LIPC|PON1|PCYOX1|LSR	-1.9
GO Cellular Components	GO:1990777	lipoprotein particle	-4.2	APOA1|APOC1|APOC3|APOE|CLU|LIPC|PON1|PCYOX1|LSR	-1.9
GO Cellular Components	GO:0031966	mitochondrial membrane	-4.2	ACADVL|AMBP|ARG1|ASS1|ATP5F1D|ATP5MC3|BNIP3|CLU|CPS1|CYB5A|CYP1A1|ACSL1|ACSL4|NIPSNAP2|GK|IFI27|MAOA|MAOB|NDUFA3|NDUFA9|NDUFB6|NDUFS4|NDUFS8|OTC|PPOX|SDHC|SORD|UBB|UBC|UQCRH|KMO|TMEM11|DELE1|SLC25A15|PEMT|MTX2|YME1L1|CLPX|SPART|GRAMD4|NNT|PISD|HIGD1A|MRPS18B|MRPL13|DNAJC15|TMEM14C|ARMCX3|CYCS|TTC19|CHCHD3|AURKAIP1|FOXRED1|MFF|MAVS|SQOR|MRPS14|MRPS24|MRPL11|MRPL1|TMEM135|SLC25A32|ACAD11|CARD19|ATA…	-1.9
GO Cellular Components	GO:0005681	spliceosomal complex	-4.2	DDX5|FRG1|HNRNPA1|HNRNPA2B1|HNRNPC|HNRNPH3|HNRNPM|SNRNP70|SNRPC|AKAP17A|DHX38|RBM5|ALYREF|TXNL4A|RALY|SF3B1|SRRM2|LUC7L2|LUC7L3|PRPF39|PRPF38B|SMU1|PRPF40A|LUC7L|PTBP2|ZCRB1|HNRNPA3	-1.9
GO Cellular Components	GO:0005685	U1 snRNP	-4.1	SNRNP70|SNRPC|LUC7L2|LUC7L3|PRPF39|PRPF40A|LUC7L	-1.9
GO Cellular Components	GO:1990904	ribonucleoprotein complex	-3.9	DDX5|DDX6|DHX9|EIF4G1|FMR1|FRG1|HNRNPA1|HNRNPA2B1|HNRNPC|HNRNPH3|EIF3E|HNRNPM|RPL9|RPL10|RPL12|RPL22|RPL34|RPS11|RPS16|RPS18|RPS24|RPS25|SNRNP70|SNRPC|TAF9|TARBP2|FXR1|AKAP17A|DHX38|G3BP2|RBM12|G3BP1|RBM5|ALYREF|EMG1|NOP56|CELF1|TXNL4A|CPEB3|RALY|SF3B1|SRRM2|LSM14A|RSL1D1|DAZAP1|AKAP8L|SND1|MRPS18B|MRPL13|LUC7L2|LUC7L3|PHAX|AURKAIP1|PIH1D1|PRPF39|PRPF38B|SMU1|PRPF40A|LUC7L|PTBP2|MRPS14|MRPS24|MRP…	-1.7
GO Cellular Components	GO:0005777	peroxisome	-3.9	ACOX1|AGXT|ACSL1|ACSL4|HSD17B4|NBR1|PHYH|PEX19|PXMP2|SCP2|ACOX2|RIDA|ECI2|PRDX5|DECR2|PIPOX|MFF|MAVS|TMEM135|ACAD11|ATAD1|NUDT7	-1.7
GO Cellular Components	GO:0042579	microbody	-3.9	ACOX1|AGXT|ACSL1|ACSL4|HSD17B4|NBR1|PHYH|PEX19|PXMP2|SCP2|ACOX2|RIDA|ECI2|PRDX5|DECR2|PIPOX|MFF|MAVS|TMEM135|ACAD11|ATAD1|NUDT7	-1.7
GO Cellular Components	GO:0034366	spherical high-density lipoprotein particle	-3.9	APOA1|APOC3|CLU|PON1	-1.7
GO Cellular Components	GO:0034364	high-density lipoprotein particle	-3.8	APOA1|APOC1|APOC3|APOE|CLU|LIPC|PON1	-1.6
GO Cellular Components	GO:0005579	membrane attack complex	-3.4	C5|C6|C8B|C9	-1.3
GO Cellular Components	GO:0034361	very-low-density lipoprotein particle	-3.2	APOA1|APOC1|APOC3|APOE|PCYOX1|LSR	-1.1
GO Cellular Components	GO:0034385	triglyceride-rich plasma lipoprotein particle	-3.2	APOA1|APOC1|APOC3|APOE|PCYOX1|LSR	-1.1
GO Cellular Components	GO:0042627	chylomicron	-3.2	APOA1|APOC1|APOC3|APOE|LSR	-1.1
GO Cellular Components	GO:0005577	fibrinogen complex	-3.1	FGA|FGB|FGG|FN1	-1.1
GO Cellular Components	GO:0005743	mitochondrial inner membrane	-3.1	ACADVL|AMBP|ATP5F1D|ATP5MC3|CLU|CPS1|CYP1A1|NDUFA3|NDUFA9|NDUFB6|NDUFS4|NDUFS8|OTC|PPOX|SDHC|UQCRH|TMEM11|DELE1|SLC25A15|MTX2|YME1L1|CLPX|NNT|PISD|HIGD1A|MRPS18B|MRPL13|DNAJC15|TMEM14C|CYCS|TTC19|CHCHD3|AURKAIP1|FOXRED1|SQOR|MRPS14|MRPS24|MRPL11|MRPL1|SLC25A32|ACAD11|MTG1|SFXN1|MRPL52|APOOL|SLC25A48|LDHD|SLC25A45|TMEM242	-1.1
GO Cellular Components	GO:0005770	late endosome	-3.1	CD74|SLC31A1|CTSH|HLA-DRA|INSR|NBR1|MAPK3|VAMP7|TF|TPT1|SLC30A2|CLTCL1|STX8|TMEM59|RAPGEF2|LAPTM4A|PLEKHM1|VPS39|SLC39A14|PLD3|TMEM230|YIPF1|STEAP3|LAPTM4B|ATP13A3|RNF128|RILP|MVB12A|OSBPL1A|OSBPL9|WDR81|DENND10	-1.1
GO Cellular Components	GO:0000124	SAGA complex	-3	ATXN7|TAF9|TAF10|KAT2B|SUPT20H|ENY2|TADA2B	-1
GO Cellular Components	GO:0070461	SAGA-type complex	-2.9	ATXN7|TAF9|TAF10|KAT2B|ZZZ3|MBIP|SUPT20H|ENY2|TADA2B	-0.97
GO Cellular Components	GO:0005782	peroxisomal matrix	-2.8	ACOX1|AGXT|HSD17B4|PHYH|SCP2|ACOX2|ECI2|PRDX5|PIPOX|NUDT7	-0.89
GO Cellular Components	GO:0031907	microbody lumen	-2.8	ACOX1|AGXT|HSD17B4|PHYH|SCP2|ACOX2|ECI2|PRDX5|PIPOX|NUDT7	-0.89
GO Cellular Components	GO:0019866	organelle inner membrane	-2.7	ACADVL|AMBP|ATP5F1D|ATP5MC3|CLU|CPS1|CYP1A1|IFI27|NDUFA3|NDUFA9|NDUFB6|NDUFS4|NDUFS8|OTC|PPOX|SDHC|UQCRH|TMEM11|DELE1|SLC25A15|ZMPSTE24|MTX2|YME1L1|CLPX|NNT|PISD|HIGD1A|MRPS18B|MRPL13|DNAJC15|TMEM14C|CYCS|TTC19|CHCHD3|AURKAIP1|FOXRED1|SQOR|MRPS14|MRPS24|MRPL11|MRPL1|SLC25A32|ACAD11|MTG1|SFXN1|MRPL52|APOOL|SLC25A48|LDHD|SLC25A45|DPY19L4|TMEM242	-0.84
GO Cellular Components	GO:0016607	nuclear speck	-2.7	ATP6V0A1|CLK2|MAPK14|NR3C1|IFI16|MBD1|AFDN|MOCS2|NONO|PSKH1|SRSF5|SRSF6|SNRNP70|AKAP17A|STK19|SRSF11|TRIP12|RBM39|WTAP|BCLAF1|DDX46|THRAP3|HDAC5|ALYREF|NXF1|RNPS1|SF3B1|SRRM2|CHTOP|AKAP8L|ARL6IP4|LUC7L2|LUC7L3|SMU1|PRPF40A|COP1|ZNF106|S100PBP|ILRUN|CCNL2|ASCC2|ZC3H18	-0.82
GO Cellular Components	GO:1905369	endopeptidase complex	-2.7	CFH|MBL2|PLAUR|PSMA2|PSMB3|PSMC3|PSMD1|PSMD9|RAD23A|PSMF1|UCHL5|COLEC11|ZFAND2A	-0.8
GO Cellular Components	GO:0035770	ribonucleoprotein granule	-2.7	ARNTL|CTSH|DDX6|DHX9|EIF4G1|FMR1|GHR|PSMA2|PSMC3|FXR1|CLOCK|G3BP2|G3BP1|NXF1|CELF1|RBPMS|PRRC2C|SYNE1|KHNYN|LSM14A|CHTOP|TRUB2|SHFL|DCP1A|FASTKD5|EDC3|HNRNPA3|MCRIP1	-0.8
GO Cellular Components	GO:1905370	serine-type endopeptidase complex	-2.6	CFH|MBL2|PLAUR|COLEC11	-0.71
GO Cellular Components	GO:0005787	signal peptidase complex	-2.4	SEC11A|SPCS1|SEC11C	-0.65
GO Cellular Components	GO:0046581	intercellular canaliculus	-2.4	ABCB4|STARD10|MTDH	-0.65
GO Cellular Components	GO:0005778	peroxisomal membrane	-2.4	ACOX1|ACSL1|ACSL4|HSD17B4|NBR1|PEX19|PXMP2|DECR2|MAVS|TMEM135|ATAD1	-0.62
GO Cellular Components	GO:0031903	microbody membrane	-2.4	ACOX1|ACSL1|ACSL4|HSD17B4|NBR1|PEX19|PXMP2|DECR2|MAVS|TMEM135|ATAD1	-0.62
GO Cellular Components	GO:1990124	messenger ribonucleoprotein complex	-2.4	FMR1|CPEB3|LSM14A|HNRNPA3	-0.6
GO Cellular Components	GO:0016281	eukaryotic translation initiation factor 4F complex	-2.4	EIF4A1|EIF4G1|EIF4G2|EIF4G3	-0.6
GO Cellular Components	GO:0036464	cytoplasmic ribonucleoprotein granule	-2.2	ARNTL|CTSH|DDX6|DHX9|EIF4G1|FMR1|GHR|PSMA2|PSMC3|FXR1|CLOCK|G3BP2|G3BP1|NXF1|CELF1|RBPMS|PRRC2C|SYNE1|KHNYN|LSM14A|CHTOP|SHFL|DCP1A|EDC3|MCRIP1	-0.51
GO Cellular Components	GO:1905286	serine-type peptidase complex	-2.2	CFH|MBL2|PLAUR|COLEC11	-0.48
GO Cellular Components	GO:0005793	endoplasmic reticulum-Golgi intermediate compartment	-2.2	CTSC|CLN8|F5|FN1|GOLGA2|MGAT1|P4HB|SERPINA1|CNIH1|FTCD|KDELR1|ERP44|SLC35C2|TRAPPC12|COPZ2|UGGT1|ERGIC1	-0.47
GO Cellular Components	GO:0097525	spliceosomal snRNP complex	-2.1	SNRNP70|SNRPC|TXNL4A|SF3B1|LUC7L2|LUC7L3|PRPF39|PRPF40A|LUC7L	-0.43
GO Cellular Components	GO:0031968	organelle outer membrane	-2.1	ARG1|ASS1|ATP5MC3|BNIP3|CYB5A|ACSL1|ACSL4|NIPSNAP2|GK|IFI27|MAOA|MAOB|UBB|UBC|KMO|MTX2|SPART|SYNE1|ARMCX3|CHCHD3|SMPD4|MFF|MAVS|ATAD1|APOOL	-0.41
GO Cellular Components	GO:0005741	mitochondrial outer membrane	-2.1	ARG1|ASS1|ATP5MC3|BNIP3|CYB5A|ACSL1|ACSL4|NIPSNAP2|GK|IFI27|MAOA|MAOB|UBB|UBC|KMO|MTX2|SPART|ARMCX3|CHCHD3|MFF|MAVS|ATAD1|APOOL	-0.39
GO Cellular Components	GO:0019867	outer membrane	-2.1	ARG1|ASS1|ATP5MC3|BNIP3|CYB5A|ACSL1|ACSL4|NIPSNAP2|GK|IFI27|MAOA|MAOB|UBB|UBC|KMO|MTX2|SPART|SYNE1|ARMCX3|CHCHD3|SMPD4|MFF|MAVS|ATAD1|APOOL	-0.39
GO Cellular Components	GO:0010494	cytoplasmic stress granule	-2	DDX6|EIF4G1|FMR1|G3BP2|G3BP1|NXF1|CELF1|RBPMS|PRRC2C|LSM14A|MCRIP1	-0.38
GO Molecular Functions	GO:0003729	mRNA binding	-11	CRYZ|DDX5|DDX6|DHX9|EIF4A1|EIF4G1|EIF4G2|FMR1|HNRNPA2B1|HNRNPC|HNRNPM|PCBP2|PTBP1|SRSF5|SRSF6|SNRNP70|SNRPC|FXR1|THOC5|EIF4G3|QKI|G3BP2|PTBP3|G3BP1|RBM5|ALYREF|RIDA|NXF1|CELF1|RNPS1|RBPMS|PARK7|CPEB3|KHNYN|SF3B1|SRRM2|LSM14A|CHTOP|RSL1D1|DAZAP1|MRPL13|A1CF|LUC7L2|LUC7L3|RBM47|SHFL|LUC7L|DCP1A|PCBP4|PTBP2|EDC3|HNRNPA3	-7.3
GO Molecular Functions	GO:0016491	oxidoreductase activity	-9	ACADVL|ACOX1|ADH4|ADH6|ALDH1A1|AMBP|CBR1|CDO1|CP|CRYZ|CYB5A|CYP1A1|CYP1A2|CYP2C18|DPYD|FMO4|FTH1|GCDH|GLUD1|GPX3|GPX4|GSTZ1|HPD|HPGD|HSD17B4|IDH3G|CYP4F3|MAOA|MAOB|MTRR|NDUFA3|NDUFA9|NDUFB6|NDUFS4|NDUFS8|P4HB|PAH|PAM|PHYH|POR|PPOX|SDHC|SORD|TDO2|TXNRD1|UGDH|UQCRH|VCAM1|ACOX2|KMO|ALDH4A1|DHRS3|FADS2|AASS|ALDH1L1|PARK7|STAB1|ETHE1|HAAO|NNT|PRDX5|DECR2|CRYL1|RDH11|DCXR|PIPOX|PCYOX1|DHRS7|CYCS|STEAP3…	-5.8
GO Molecular Functions	GO:0050660	flavin adenine dinucleotide binding	-5.3	ACADVL|ACOX1|DPYD|FMO4|GCDH|MAOA|MAOB|MTRR|POR|PPOX|TXNRD1|ACOX2|KMO|PIPOX|PCYOX1|ERO1B|SQOR|ACAD11|LDHD	-2.7
GO Molecular Functions	GO:0005319	lipid transporter activity	-5	APOA1|APOE|CD36|MTTP|ABCB4|RBP4|SLCO2A1|SLCO1A2|C2CD2L|PRELID3A|ATP11A|ABCA6|PRELID3B|PITPNM2|ABCG8|MFSD2A|SLC22A9|OSBPL1A|OSBPL5|OSBPL9|OSBPL10|ATP8B3|ATP11C|ATP9B|TMEM41B	-2.5
GO Molecular Functions	GO:0004866	endopeptidase inhibitor activity	-4.6	A2M|AHSG|AMBP|BIN1|C3|C4A|C5|SERPINA6|HRG|ITIH1|ITIH2|ITIH3|ITIH4|KNG1|SERPINA5|SERPINA1|PROS1|PZP|PSMF1|PRDX5|FETUB|UCHL5	-2.2
GO Molecular Functions	GO:0030414	peptidase inhibitor activity	-4.2	A2M|AHSG|AMBP|BIN1|C3|C4A|C5|SERPINA6|HRG|ITIH1|ITIH2|ITIH3|ITIH4|KNG1|SERPINA5|SERPINA1|PROS1|PZP|PSMF1|PRDX5|FETUB|UCHL5	-2
GO Molecular Functions	GO:0005548	phospholipid transporter activity	-4.1	MTTP|ABCB4|C2CD2L|PRELID3A|ATP11A|PRELID3B|PITPNM2|MFSD2A|OSBPL5|OSBPL10|ATP8B3|ATP11C|TMEM41B	-1.9
GO Molecular Functions	GO:0061134	peptidase regulator activity	-4.1	A2M|AHSG|AMBP|BIN1|C3|C4A|C5|SERPINA6|CTSC|CTSH|FN1|HRG|ITIH1|ITIH2|ITIH3|ITIH4|KNG1|SERPINA5|SERPINA1|PROS1|PZP|PSMF1|CLPX|PRDX5|FETUB|UCHL5	-1.9
GO Molecular Functions	GO:0061135	endopeptidase regulator activity	-3.9	A2M|AHSG|AMBP|BIN1|C3|C4A|C5|SERPINA6|HRG|ITIH1|ITIH2|ITIH3|ITIH4|KNG1|SERPINA5|SERPINA1|PROS1|PZP|PSMF1|PRDX5|FETUB|UCHL5	-1.7
GO Molecular Functions	GO:0004252	serine-type endopeptidase activity	-3.3	CFB|CTSC|CTSH|F2|HABP2|HGFAC|HPN|CFI|KLKB1|PLG|PROC|MASP1|PROZ|MASP2|SEC11A|C1RL|SEC11C	-1.3
GO Molecular Functions	GO:0016811	hydrolase activity, acting on carbon-nitrogen (but not peptide) bonds, in linear amides	-3.2	ASPA|NDST1|NIT1|HDAC5|SIRT3|GLS2|MIER2|NIT2|MIER1|ACY3|NTAN1|AFMID|ASPG	-1.2
GO Molecular Functions	GO:0071814	protein-lipid complex binding	-3.1	APOA1|APOE|CD36|SCARB1|LIPC|STAB1|STAB2	-1.1
GO Molecular Functions	GO:0071813	lipoprotein particle binding	-3.1	APOA1|APOE|CD36|SCARB1|LIPC|STAB1|STAB2	-1.1
GO Molecular Functions	GO:0004175	endopeptidase activity	-3.1	CFB|CTSC|CPS1|CTSH|F2|HABP2|HGFAC|HPN|CFI|KLKB1|MME|PLG|PROC|MASP1|PSMB3|REN|ADAM17|USP7|USP5|CTSF|ADAM15|ADAM9|PROZ|TMEM59|USP34|RCE1|ZMPSTE24|YME1L1|MASP2|ADAMTS13|SEC11A|USP25|C1RL|KDM8|SEC11C|ATG4A	-1.1
GO Molecular Functions	GO:0016616	oxidoreductase activity, acting on the CH-OH group of donors, NAD or NADP as acceptor	-3.1	ADH4|ADH6|CBR1|HPGD|HSD17B4|IDH3G|SORD|UGDH|DHRS3|CRYL1|RDH11|DCXR|DHRS7|BDH2|HSD3B7|LDHD	-1.1
GO Molecular Functions	GO:0016614	oxidoreductase activity, acting on CH-OH group of donors	-3.1	ADH4|ADH6|CBR1|HPGD|HSD17B4|IDH3G|CYP4F3|SORD|UGDH|DHRS3|CRYL1|RDH11|DCXR|DHRS7|BDH2|HSD3B7|LDHD	-1.1
GO Molecular Functions	GO:0051287	NAD binding	-3.1	ADH4|ALDH1A1|GLUD1|HPGD|IDH3G|SORD|UGDH|SIRT3|NNT|CRYL1|BDH2	-1.1
GO Molecular Functions	GO:0071949	FAD binding	-2.9	ACOX1|MTRR|TXNRD1|ACOX2|KMO|PCYOX1|ERO1B|SQOR|LDHD	-0.97
GO Molecular Functions	GO:0016810	hydrolase activity, acting on carbon-nitrogen (but not peptide) bonds	-2.9	ARG1|ASPA|GCH1|NDST1|NIT1|HDAC5|RIDA|SIRT3|GLS2|MIER2|NIT2|MIER1|ACY3|NTAN1|AFMID|AMDHD1|ASPG	-0.97
GO Molecular Functions	GO:1901681	sulfur compound binding	-2.9	ACADVL|APOE|COL13A1|F2|FGFR2|FN1|GCDH|GSTM1|HDGF|CFH|HRG|KNG1|LIPC|SERPINA5|RPL22|SCP2|SULT1A1|VEGFB|VTN|PDCD5|ECI2|GNMT|ANGPTL3|PANK1|FGFRL1|OGDHL|SMOC1|ACBD4|SETD6	-0.97
GO Molecular Functions	GO:0019842	vitamin binding	-2.9	ADH4|AGXT|ALB|KYAT1|GC|GPT|PAM|PHYH|RBP4|SLC19A1|TAT|TCN2|KYNU|MTHFS|FTCD|GNMT|SCLY|OGDHL|AGXT2	-0.93
GO Molecular Functions	GO:0036002	pre-mRNA binding	-2.8	DDX5|HNRNPA1|HNRNPA2B1|PTBP1|SRSF6|SNRPC|TARBP2|CELF1	-0.91
GO Molecular Functions	GO:0008514	organic anion transmembrane transporter activity	-2.8	CD36|SLC26A2|SLC29A1|SLC1A2|SLC7A2|SLC19A1|SLCO2A1|SLCO1A2|SLC5A6|SLC22A6|ABCC5|SLC25A15|SLC35A1|SLC38A3|SLC47A1|LRRC8A|SLC25A32|MFSD2A|SFXN1|SLC22A9|SLC26A8|SLC36A4	-0.91
GO Molecular Functions	GO:0070053	thrombospondin receptor activity	-2.8	CD36|CD47|F2	-0.91
GO Molecular Functions	GO:0016651	oxidoreductase activity, acting on NAD(P)H	-2.7	ADH4|CBR1|CRYZ|MTRR|NDUFA3|NDUFA9|NDUFB6|NDUFS4|NDUFS8|POR|KMO|NNT|DCXR	-0.84
GO Molecular Functions	GO:0070325	lipoprotein particle receptor binding	-2.7	APOA1|APOC3|APOE|CLU|DAB2|HSP90B1|PICALM	-0.79
GO Molecular Functions	GO:0030169	low-density lipoprotein particle binding	-2.6	CD36|SCARB1|LIPC|STAB1|STAB2	-0.75
GO Molecular Functions	GO:0005159	insulin-like growth factor receptor binding	-2.6	CRK|GNAS|IGF1|INSR|REN	-0.75
GO Molecular Functions	GO:0004745	NAD-retinol dehydrogenase activity	-2.6	ADH4|ADH6|DHRS3|RDH11	-0.71
GO Molecular Functions	GO:0043177	organic acid binding	-2.6	AGXT|ASS1|CPS1|GLUD1|OTC|PAM|SERPINA5|PHYH|SCP2|SLC19A1|TAT|TDO2|NR1H4|MTHFS|FTCD|GNMT|SCLY	-0.71
GO Molecular Functions	GO:0008236	serine-type peptidase activity	-2.5	CFB|CTSC|CTSH|F2|HABP2|HGFAC|HPN|CFI|KLKB1|PLG|PROC|MASP1|PROZ|MASP2|SEC11A|C1RL|SEC11C	-0.68
GO Molecular Functions	GO:0015297	antiporter activity	-2.5	SLC26A2|SLC37A4|SLC22A18|SLC4A2|SLC19A1|SLC22A6|SLC35A1|SLC38A3|SLC35C2|SLC47A1|SLC22A9|SLC26A8|SLC9B1	-0.68
GO Molecular Functions	GO:0015248	sterol transporter activity	-2.5	APOA1|APOE|MTTP|ABCG8|OSBPL1A|OSBPL5|OSBPL9|OSBPL10	-0.65
GO Molecular Functions	GO:0015291	secondary active transmembrane transporter activity	-2.5	SLC26A2|SLC37A4|SLC22A18|SLC1A2|SLC4A2|SLC12A4|SLC19A1|SLCO2A1|SLCO1A2|SLC22A5|SLC5A6|SLC22A6|SLC17A4|SLC35A1|SLC38A3|SLC39A14|SLC35C2|SLC38A4|SLC47A1|SLC2A9|MFSD2A|SLC45A3|SLC22A9|SLC26A8|SLC36A4|SLC9B1	-0.65
GO Molecular Functions	GO:0016892	endoribonuclease activity, producing 3'-phosphomonoesters	-2.4	RNASE4|RIDA|TSEN34	-0.65
GO Molecular Functions	GO:0008131	primary amine oxidase activity	-2.4	MAOA|MAOB|VCAM1	-0.65
GO Molecular Functions	GO:0060228	phosphatidylcholine-sterol O-acyltransferase activator activity	-2.4	APOA1|APOC1|APOE	-0.65
GO Molecular Functions	GO:0005007	fibroblast growth factor receptor activity	-2.4	FGFR3|FGFR2|FGFRL1	-0.65
GO Molecular Functions	GO:0016627	oxidoreductase activity, acting on the CH-CH group of donors	-2.4	ACADVL|ACOX1|DPYD|GCDH|PPOX|SDHC|ACOX2|DECR2|BDH2|ACAD11	-0.65
GO Molecular Functions	GO:0005496	steroid binding	-2.4	APOA1|APOC3|SERPINA6|ESRRA|GC|NR3C1|SCP2|SHBG|SULT1E1|NR1H4|OSBPL1A|OSBPL5|OSBPL9|OSBPL10	-0.62
GO Molecular Functions	GO:0120227	acyl-CoA binding	-2.4	ACADVL|GCDH|SCP2|ECI2|PANK1|ACBD4	-0.6
GO Molecular Functions	GO:0015605	organophosphate ester transmembrane transporter activity	-2.4	SLC29A1|SLC37A4|SLC19A1|ABCC5|LRRC8A|SLC25A32|MFSD2A	-0.6
GO Molecular Functions	GO:0070330	aromatase activity	-2.4	CYP1A1|CYP1A2|CYP2C18|CYP4F3	-0.6
GO Molecular Functions	GO:0017171	serine hydrolase activity	-2.4	CFB|CTSC|CTSH|F2|HABP2|HGFAC|HPN|CFI|KLKB1|PLG|PROC|MASP1|PROZ|MASP2|SEC11A|C1RL|SEC11C	-0.6
GO Molecular Functions	GO:0016209	antioxidant activity	-2.3	ALB|APOE|GPX3|GPX4|GSTZ1|TXNRD1|PARK7|PRDX5|PRXL2A|TXNDC17|PRXL2C	-0.59
GO Molecular Functions	GO:0120013	lipid transfer activity	-2.3	APOA1|APOE|MTTP|C2CD2L|PRELID3A|PRELID3B|PITPNM2|ABCG8|OSBPL5	-0.56
GO Molecular Functions	GO:0004867	serine-type endopeptidase inhibitor activity	-2.3	A2M|AMBP|SERPINA6|HRG|ITIH1|ITIH2|ITIH3|ITIH4|SERPINA5|SERPINA1|PZP	-0.54
GO Molecular Functions	GO:0004857	enzyme inhibitor activity	-2.3	A2M|AHSG|AMBP|BIN1|APOC1|APOC3|C3|C4A|C5|SERPINA6|HRG|ITIH1|ITIH2|ITIH3|ITIH4|KNG1|OAZ1|SERPINA5|SERPINA1|DNAJC3|PROS1|PRPSAP2|PZP|RNH1|PPP1R11|KAT2B|PSMF1|APBA3|PRDX5|FETUB|ANGPTL3|UCHL5|MBIP|PINX1	-0.54
GO Molecular Functions	GO:0022804	active transmembrane transporter activity	-2.3	ATP6V0A1|CYB5A|SLC26A2|SLC37A4|NDUFA3|NDUFA9|NDUFB6|NDUFS4|NDUFS8|SLC22A18|ABCB4|SLC1A2|SLC4A2|SLC12A4|SLC19A1|SLCO2A1|SLCO1A2|SLC22A5|UQCRH|SLC5A6|SLC22A6|SLC17A4|ABCC5|SLC35A1|SLC38A3|ABCA6|SLC39A14|SLC35C2|SLC38A4|SLC47A1|SLC2A9|ABCG8|ATP13A3|MFSD2A|SLC45A3|SLC22A9|SLC26A8|SLC36A4|SLC9B1	-0.53
GO Molecular Functions	GO:0005542	folic acid binding	-2.2	SLC19A1|MTHFS|FTCD|GNMT	-0.48
GO Molecular Functions	GO:0016655	oxidoreductase activity, acting on NAD(P)H, quinone or similar compound as acceptor	-2.2	ADH4|CBR1|CRYZ|NDUFA3|NDUFA9|NDUFB6|NDUFS4|NDUFS8|DCXR	-0.47
GO Molecular Functions	GO:0090555	phosphatidylethanolamine flippase activity	-2.2	ABCB4|ATP11A|ATP11C	-0.47
GO Molecular Functions	GO:0008201	heparin binding	-2.1	APOE|COL13A1|F2|FGFR2|FN1|HDGF|CFH|HRG|KNG1|LIPC|SERPINA5|RPL22|VEGFB|VTN|PDCD5|ANGPTL3|FGFRL1|SMOC1	-0.43
GO Molecular Functions	GO:0003727	single-stranded RNA binding	-2.1	DHX9|FMR1|HNRNPA1|HNRNPC|PTBP1|SNRPC|FXR1|HNRNPDL|RBPMS|LSM14A|DAZAP1|A1CF	-0.43
GO Molecular Functions	GO:0005539	glycosaminoglycan binding	-2.1	APOE|COL13A1|F2|FGFR2|FN1|HABP2|HDGF|CFH|HRG|ITIH1|ITIH2|KNG1|LIPC|SERPINA5|RPL22|VEGFB|VTN|PDCD5|STAB1|ANGPTL3|FGFRL1|STAB2|SMOC1	-0.41
GO Molecular Functions	GO:0140326	ATPase-coupled intramembrane lipid transporter activity	-2.1	ABCB4|ATP11A|MFSD2A|ATP8B3|ATP11C|ATP9B	-0.41
GO Molecular Functions	GO:0015347	sodium-independent organic anion transmembrane transporter activity	-2	SLCO2A1|SLCO1A2|SLC22A6|SLC22A9	-0.39
GO Molecular Functions	GO:0016840	carbon-nitrogen lyase activity	-2	ASL|HAL|PAM|FTCD	-0.39
KEGG Pathway	hsa04610	Complement and coagulation cascades	-14	A2M|CFB|C3|C4A|C4BPA|C5|C6|C8B|C9|CLU|F2|F5|F13B|FGA|FGB|FGG|CFH|CFI|KLKB1|KNG1|SERPINA5|SERPINA1|PLAUR|PLG|PROC|PROS1|MASP1|VTN|MASP2	-12
KEGG Pathway	hsa00250	Alanine, aspartate and glutamate metabolism	-4.9	AGXT|ASL|ASPA|ASS1|CPS1|GLUD1|GPT|ALDH4A1|GLS2|NIT2|AGXT2	-2.8
KEGG Pathway	hsa05171	Coronavirus disease - COVID-19	-4.9	CFB|C3|C4A|C5|C6|C8B|C9|MAPK14|F2|F13B|FGA|FGB|FGG|IL6ST|MAPK3|MASP1|RPL9|RPL10|RPL12|RPL22|RPL34|RPS11|RPS16|RPS18|RPS24|RPS25|STAT1|ADAM17|MASP2|MAVS|RPL22L1	-2.8
KEGG Pathway	hsa00220	Arginine biosynthesis	-4.5	ARG1|ASL|ASS1|CPS1|GLUD1|GPT|OTC|GLS2	-2.6
KEGG Pathway	hsa05150	Staphylococcus aureus infection	-4.5	CFB|C3|C4A|C5|FGG|CFH|HLA-DRA|CFI|ITGAL|PLG|MASP1|MASP2	-2.6
KEGG Pathway	hsa04216	Ferroptosis	-4.3	CP|ACSL1|ACSL4|FTH1|GPX4|PCBP2|TF|NCOA4|SLC39A14|STEAP3|SAT2	-2.6
KEGG Pathway	hsa00982	Drug metabolism - cytochrome P450	-4.3	ADH4|ADH6|CYP1A2|FMO4|GSTA2|GSTA4|GSTM1|MAOA|MAOB|UGT1A6	-2.6
KEGG Pathway	hsa00380	Tryptophan metabolism	-4.2	KYAT1|CYP1A1|CYP1A2|GCDH|MAOA|MAOB|TDO2|KMO|KYNU|HAAO|AFMID	-2.6
KEGG Pathway	hsa05204	Chemical carcinogenesis - DNA adducts	-3.9	CBR1|CYP1A1|CYP1A2|CYP2C18|GSTA2|GSTA4|GSTM1|SULT1A1|UGT1A6	-2.3
KEGG Pathway	hsa00830	Retinol metabolism	-3.8	ADH4|ADH6|ALDH1A1|CYP1A1|CYP1A2|CYP2C18|DHRS3|RDH11|UGT1A6	-2.3
KEGG Pathway	hsa04979	Cholesterol metabolism	-3.7	APOA1|APOC1|APOC3|APOE|CD36|SCARB1|LIPA|LIPC|ANGPTL3|ABCG8|OSBPL5	-2.2
KEGG Pathway	hsa04146	Peroxisome	-3.5	ACOX1|AGXT|ACSL1|ACSL4|HSD17B4|PHYH|PEX19|PXMP2|SCP2|ACOX2|ECI2|PRDX5|DECR2|PIPOX|NUDT7	-2
KEGG Pathway	hsa00980	Metabolism of xenobiotics by cytochrome P450	-3.2	ADH4|ADH6|CBR1|CYP1A1|CYP1A2|GSTA2|GSTA4|GSTM1|UGT1A6	-1.8
KEGG Pathway	hsa04975	Fat digestion and absorption	-3.2	APOA1|CD36|SCARB1|MTTP|AGPAT2|PLA2G3|ABCG8|DGAT2	-1.8
KEGG Pathway	hsa00340	Histidine metabolism	-3.1	ASPA|HAL|HNMT|MAOA|MAOB|FTCD|AMDHD1	-1.8
KEGG Pathway	hsa00260	Glycine, serine and threonine metabolism	-3.1	AGXT|BHMT|GAMT|GCSH|MAOA|MAOB|GNMT|PIPOX|AGXT2	-1.8
KEGG Pathway	hsa03320	PPAR signaling pathway	-3	ACOX1|APOA1|APOC3|CD36|ACSL1|ACSL4|GK|PPARA|SCP2|UBC|ACOX2|FADS2|SORBS1	-1.7
KEGG Pathway	hsa00040	Pentose and glucuronate interconversions	-3	SORD|UGDH|CRYL1|DCXR|UGT1A6|FGGY	-1.7
KEGG Pathway	hsa00360	Phenylalanine metabolism	-2.8	HPD|MAOA|MAOB|PAH|TAT	-1.5
KEGG Pathway	hsa00350	Tyrosine metabolism	-2.7	ADH4|ADH6|GSTZ1|HPD|MAOA|MAOB|TAT	-1.4
KEGG Pathway	hsa00983	Drug metabolism - other enzymes	-2.2	DPYD|TYMP|GSTA2|GSTA4|GSTM1|TK2|NME6|UGT1A6|UPP2	-1
KEGG Pathway	hsa00071	Fatty acid degradation	-2.2	ACADVL|ACOX1|ADH4|ADH6|ACSL1|ACSL4|GCDH|ECI2	-0.98
KEGG Pathway	hsa03040	Spliceosome	-2.1	DDX5|HNRNPA1|HNRNPC|HNRNPM|SRSF5|SRSF6|SNRNP70|SNRPC|DHX38|DDX46|ALYREF|TXNL4A|SF3B1|PRPF38B|PRPF40A|HNRNPA3	-0.89
KEGG Pathway	hsa00120	Primary bile acid biosynthesis	-2	HSD17B4|SCP2|ACOX2|HSD3B7	-0.88
