# Supplementary material for: Sex differences in gene expression and alternative splicing in the Chinese horseshoe bat
Source: PeerJ. 2023 Apr 24;11:e15231. doi: 10.7717/peerj.15231 (PMC10135408; doi:10.7717/peerj.15231)
Supplement: Table S9 — Significant terms and pathways with the q-value of 0.05 were shown in bold. Highlighted terms are those representatives after removing the redundancy. Log (q-value) of −1.3 is equal to q-value of 0.05. Terms and pathways with uncorrected p < 0.01 were also shown. Log (p-value) of −2.2 is equal to p-value of 0.01. [file peerj-11-15231-s009.xlsx]

## Sheet: DSGs_share_brian-liver_387
Category	GO	Description	LogP	Hits	Log(q-value)
GO Biological Processes	GO:0043484	regulation of RNA splicing	-11	CLK1|CLK2|FMR1|HNRNPA1|HNRNPA2B1|HNRNPH3|ATXN7|SRSF5|SFSWAP|SNRNP70|TAF9|KAT2B|QKI|RBM39|WTAP|RBM12|CELF1|RNPS1|DAZAP1|SUPT20H|PCBP4|CLK4|PTBP2|CCNL2	-6.4
GO Biological Processes	GO:0006397	mRNA processing	-9.7	DHX9|FMR1|HNRNPA1|HNRNPA2B1|HNRNPC|HNRNPH3|HNRNPM|SRSF5|SFSWAP|SNRNP70|SUPT6H|SRSF11|QKI|RBM39|WTAP|DDX46|CELF1|TXNL4A|PAPOLA|RNPS1|RALY|KIN|SF3B1|SRRM2|AKAP8L|TRUB2|ARL6IP4|LUC7L3|AURKAIP1|PRPF39|PRPF38B|LUC7L|PTBP2|RBM26|TSEN34	-5.6
GO Biological Processes	GO:0008380	RNA splicing	-8.7	DHX9|FMR1|HNRNPA1|HNRNPA2B1|HNRNPC|HNRNPH3|HNRNPM|SRSF5|SFSWAP|SNRNP70|SUPT6H|SRSF11|QKI|RBM39|WTAP|DDX46|CELF1|TXNL4A|RNPS1|RALY|SF3B1|SRRM2|AKAP8L|ARL6IP4|LUC7L3|PRPF39|PRPF38B|LUC7L|PTBP2|TSEN34	-4.8
GO Biological Processes	GO:0016071	mRNA metabolic process	-8.5	DHX9|FMR1|HNRNPA1|HNRNPA2B1|HNRNPC|HNRNPH3|HNRNPM|PCBP2|POLR2I|SRSF5|SFSWAP|SNRNP70|SUPT6H|TAF9|SRSF11|QKI|RBM39|WTAP|DDX46|RIDA|CELF1|TXNL4A|PAPOLA|RNPS1|RALY|KIN|SF3B1|SRRM2|AKAP8L|TRUB2|ARL6IP4|LUC7L3|AURKAIP1|PRPF39|PRPF38B|LUC7L|PTBP2|RBM26|TSEN34|PUS3	-4.8
GO Molecular Functions	GO:0003729	mRNA binding	-8.5	DHX9|EIF4A1|EIF4G1|FMR1|HNRNPA2B1|HNRNPC|HNRNPM|PCBP2|SRSF5|SNRNP70|EIF4G3|QKI|RIDA|NXF1|CELF1|RNPS1|PARK7|CPEB3|SF3B1|SRRM2|LSM14A|CHTOP|DAZAP1|LUC7L3|LUC7L|PCBP4|PTBP2	-4.8
GO Biological Processes	GO:0050684	regulation of mRNA processing	-7.3	CCNT1|DHX9|FMR1|HNRNPA1|HNRNPA2B1|SFSWAP|SNRNP70|SUPT6H|QKI|RBM39|WTAP|CELF1|PAPOLA|RNPS1|CPEB3|DAZAP1|PCBP4	-3.7
GO Biological Processes	GO:0000377	RNA splicing, via transesterification reactions with bulged adenosine as nucleophile	-6.1	DHX9|HNRNPA1|HNRNPA2B1|HNRNPC|HNRNPH3|HNRNPM|SRSF5|SFSWAP|SNRNP70|DDX46|CELF1|TXNL4A|RNPS1|RALY|SF3B1|SRRM2|LUC7L3|PRPF39|LUC7L|PTBP2	-2.6
GO Biological Processes	GO:0000398	mRNA splicing, via spliceosome	-6.1	DHX9|HNRNPA1|HNRNPA2B1|HNRNPC|HNRNPH3|HNRNPM|SRSF5|SFSWAP|SNRNP70|DDX46|CELF1|TXNL4A|RNPS1|RALY|SF3B1|SRRM2|LUC7L3|PRPF39|LUC7L|PTBP2	-2.6
GO Biological Processes	GO:0000375	RNA splicing, via transesterification reactions	-5.9	DHX9|HNRNPA1|HNRNPA2B1|HNRNPC|HNRNPH3|HNRNPM|SRSF5|SFSWAP|SNRNP70|DDX46|CELF1|TXNL4A|RNPS1|RALY|SF3B1|SRRM2|LUC7L3|PRPF39|LUC7L|PTBP2	-2.5
GO Biological Processes	GO:0048024	regulation of mRNA splicing, via spliceosome	-5.1	FMR1|HNRNPA1|HNRNPA2B1|SFSWAP|SNRNP70|QKI|RBM39|WTAP|CELF1|RNPS1|DAZAP1|PCBP4	-1.7
GO Cellular Components	GO:0016607	nuclear speck	-5	CLK2|NR3C1|IFI16|MBD1|AFDN|MOCS2|SRSF5|SNRNP70|STK19|SRSF11|TRIP12|RBM39|WTAP|DDX46|HDAC5|NXF1|RNPS1|SF3B1|SRRM2|CHTOP|AKAP8L|ARL6IP4|LUC7L3|ZNF106|ILRUN|CCNL2	-1.7
GO Biological Processes	GO:0000245	spliceosomal complex assembly	-4.9	SRSF5|SFSWAP|CELF1|TXNL4A|SF3B1|LUC7L3|PRPF39|LUC7L|PTBP2	-1.6
GO Biological Processes	GO:0006376	mRNA splice site selection	-4.8	SRSF5|SFSWAP|CELF1|LUC7L3|PRPF39|LUC7L|PTBP2	-1.6
GO Biological Processes	GO:1903311	regulation of mRNA metabolic process	-4.4	CCNT1|DHX9|FMR1|HNRNPA1|HNRNPA2B1|HNRNPC|HNRNPM|SFSWAP|SNRNP70|SUPT6H|QKI|RBM39|WTAP|RIDA|CELF1|PAPOLA|RNPS1|CPEB3|DAZAP1|PCBP4	-1.2
GO Cellular Components	GO:0071004	U2-type prespliceosome	-4.3	SNRNP70|SF3B1|LUC7L3|PRPF39|LUC7L	-1.1
GO Cellular Components	GO:0071010	prespliceosome	-4.3	SNRNP70|SF3B1|LUC7L3|PRPF39|LUC7L	-1.1
GO Cellular Components	GO:0005681	spliceosomal complex	-4.2	HNRNPA1|HNRNPA2B1|HNRNPC|HNRNPH3|HNRNPM|SNRNP70|TXNL4A|RALY|SF3B1|SRRM2|LUC7L3|PRPF39|PRPF38B|LUC7L|PTBP2	-1.1
GO Biological Processes	GO:0030163	protein catabolic process	-4.2	ARNTL|ARRB2|CLU|IFI27|PCBP2|PSMA2|PSMB3|PPP1R11|UBB|UBC|UBE2D3|UBE2G1|UBE2H|USP5|MTA1|TRIP12|PSMF1|USP34|ZMPSTE24|OGA|YME1L1|USP19|PISD|UCHL5|PCYOX1|RNF126|RNF130|PCNP|RCN3|RNF123|DCAF11|SHARPIN|ZFAND2A|KLHDC3|AGAP3	-1.1
GO Biological Processes	GO:0044257	cellular protein catabolic process	-4.2	ARNTL|ARRB2|IFI27|PCBP2|PSMA2|PSMB3|PPP1R11|UBB|UBC|UBE2D3|UBE2G1|UBE2H|USP5|MTA1|TRIP12|PSMF1|USP34|ZMPSTE24|YME1L1|USP19|PISD|UCHL5|PCYOX1|RNF126|RNF130|PCNP|RCN3|RNF123|DCAF11|SHARPIN|ZFAND2A|KLHDC3|AGAP3	-1.1
GO Biological Processes	GO:0051603	proteolysis involved in cellular protein catabolic process	-4.2	ARNTL|ARRB2|IFI27|PCBP2|PSMA2|PSMB3|PPP1R11|UBB|UBC|UBE2D3|UBE2G1|UBE2H|USP5|MTA1|TRIP12|PSMF1|USP34|ZMPSTE24|YME1L1|USP19|UCHL5|PCYOX1|RNF126|RNF130|PCNP|RCN3|RNF123|DCAF11|SHARPIN|ZFAND2A|KLHDC3|AGAP3	-1.1
GO Cellular Components	GO:1990904	ribonucleoprotein complex	-4	DHX9|EIF4G1|FMR1|HNRNPA1|HNRNPA2B1|HNRNPC|HNRNPH3|HNRNPM|RPL34|RPS18|RPS25|SNRNP70|TAF9|RBM12|EMG1|NOP56|CELF1|TXNL4A|CPEB3|RALY|SF3B1|SRRM2|LSM14A|DAZAP1|AKAP8L|LUC7L3|AURKAIP1|PIH1D1|PRPF39|PRPF38B|LUC7L|PTBP2|MRPL52	-0.92
GO Cellular Components	GO:1905368	peptidase complex	-3.8	PSMA2|PSMB3|ATXN7|TAF9|KAT2B|PSMF1|SEC11A|SPCS1|UCHL5|SUPT20H|ZFAND2A	-0.81
GO Biological Processes	GO:0019941	modification-dependent protein catabolic process	-3.8	ARNTL|ARRB2|IFI27|PCBP2|PSMA2|PSMB3|PPP1R11|UBB|UBC|UBE2D3|UBE2G1|UBE2H|USP5|MTA1|TRIP12|PSMF1|USP34|ZMPSTE24|USP19|UCHL5|PCYOX1|RNF126|RNF130|PCNP|DCAF11|SHARPIN|ZFAND2A|KLHDC3|AGAP3	-0.8
GO Biological Processes	GO:0031056	regulation of histone modification	-3.7	FMR1|PHF1|MAPK3|SUPT6H|TRIP12|ZMPSTE24|PARK7|SF3B1|ZZZ3|AUTS2|CHTOP|AKAP8L|MBIP|PIH1D1	-0.75
GO Biological Processes	GO:0070729	cyclic nucleotide transport	-3.7	SLC19A1|ABCC5|LRRC8A	-0.74
GO Biological Processes	GO:0010907	positive regulation of glucose metabolic process	-3.7	AKT2|GPT|PHKG2|STK11|KAT2B|SORBS1	-0.74
GO Biological Processes	GO:1901799	negative regulation of proteasomal protein catabolic process	-3.6	TAF9|PSMF1|USP19|TLK2|PARK7|UCHL5|MARCHF7	-0.74
GO Biological Processes	GO:0043632	modification-dependent macromolecule catabolic process	-3.6	ARNTL|ARRB2|IFI27|PCBP2|PSMA2|PSMB3|PPP1R11|UBB|UBC|UBE2D3|UBE2G1|UBE2H|USP5|MTA1|TRIP12|PSMF1|USP34|ZMPSTE24|USP19|UCHL5|PCYOX1|RNF126|RNF130|PCNP|DCAF11|SHARPIN|ZFAND2A|KLHDC3|AGAP3	-0.74
GO Biological Processes	GO:0015931	nucleobase-containing compound transport	-3.5	CD47|DHX9|FMR1|HNRNPA1|HNRNPA2B1|SLC19A1|SUPT6H|QKI|ABCC5|NXF1|SLC35A1|CHTOP|SLC35C2|LRRC8A	-0.6
GO Biological Processes	GO:0071826	ribonucleoprotein complex subunit organization	-3.4	DHX9|EIF2S3|KLC1|SRSF5|SFSWAP|TAF9|CELF1|TXNL4A|SF3B1|LUC7L3|PIH1D1|PRPF39|LUC7L|PTBP2	-0.56
GO Biological Processes	GO:0001408	guanine nucleotide transport	-3.4	SLC19A1|ABCC5|LRRC8A	-0.56
GO Biological Processes	GO:2000618	regulation of histone H4-K16 acetylation	-3.4	ZMPSTE24|AUTS2|PIH1D1	-0.56
GO Biological Processes	GO:0043161	proteasome-mediated ubiquitin-dependent protein catabolic process	-3.4	ARNTL|ARRB2|IFI27|PCBP2|PSMA2|PSMB3|UBE2D3|UBE2G1|UBE2H|MTA1|TRIP12|PSMF1|USP19|RNF126|PCNP|DCAF11|SHARPIN|ZFAND2A|KLHDC3|AGAP3	-0.54
GO Biological Processes	GO:0033119	negative regulation of RNA splicing	-3.3	HNRNPA2B1|SFSWAP|RNPS1|PCBP4|PTBP2	-0.54
GO Biological Processes	GO:0010906	regulation of glucose metabolic process	-3.3	AKT2|CLK2|GPT|PDK2|PHKG2|STK11|KAT2B|ZMPSTE24|FAM3C|SORBS1	-0.54
GO Biological Processes	GO:0010498	proteasomal protein catabolic process	-3.3	ARNTL|ARRB2|IFI27|PCBP2|PSMA2|PSMB3|UBE2D3|UBE2G1|UBE2H|MTA1|TRIP12|PSMF1|USP19|RNF126|PCNP|RCN3|DCAF11|SHARPIN|ZFAND2A|KLHDC3|AGAP3	-0.54
GO Cellular Components	GO:0070461	SAGA-type complex	-3.3	ATXN7|TAF9|KAT2B|ZZZ3|MBIP|SUPT20H	-0.52
GO Cellular Components	GO:0070761	pre-snoRNP complex	-3.2	TAF9|NOP56|PIH1D1	-0.41
GO Molecular Functions	GO:0034046	poly(G) binding	-3.2	FMR1|HNRNPDL|DAZAP1	-0.41
GO Biological Processes	GO:1903363	negative regulation of cellular protein catabolic process	-3.1	TAF9|PSMF1|USP19|TLK2|PARK7|ATRAID|UCHL5|MARCHF7	-0.41
GO Biological Processes	GO:0006111	regulation of gluconeogenesis	-3.1	CLK2|GPT|PDK2|STK11|KAT2B|FAM3C	-0.39
GO Biological Processes	GO:0050686	negative regulation of mRNA processing	-3.1	CCNT1|HNRNPA2B1|SFSWAP|RNPS1|PCBP4	-0.39
GO Molecular Functions	GO:0035613	RNA stem-loop binding	-3.1	DHX9|FMR1|CPEB3|DAZAP1	-0.39
GO Biological Processes	GO:0035461	vitamin transmembrane transport	-3.1	SCARB1|SLC19A1|SLC5A6|ABCC5	-0.39
GO Cellular Components	GO:0005685	U1 snRNP	-3.1	SNRNP70|LUC7L3|PRPF39|LUC7L	-0.39
GO Biological Processes	GO:0006575	cellular modified amino acid metabolic process	-3.1	ASS1|KYAT1|GSTA4|GSTM1|MTRR|SLC1A2|SLC19A1|ALDH4A1|PARK7|ETHE1|PCYOX1|OSBPL5	-0.39
GO Biological Processes	GO:0022618	ribonucleoprotein complex assembly	-3.1	DHX9|EIF2S3|SRSF5|SFSWAP|TAF9|CELF1|TXNL4A|SF3B1|LUC7L3|PIH1D1|PRPF39|LUC7L|PTBP2	-0.39
GO Biological Processes	GO:0061136	regulation of proteasomal protein catabolic process	-3	CLU|FMR1|SUMO2|TAF9|UBB|USP5|PSMF1|USP19|TLK2|PARK7|UCHL5|MARCHF7|ZFAND2A	-0.35
GO Biological Processes	GO:0010676	positive regulation of cellular carbohydrate metabolic process	-3	AKT2|GPT|PHKG2|STK11|KAT2B|SORBS1	-0.34
GO Biological Processes	GO:1903051	negative regulation of proteolysis involved in cellular protein catabolic process	-2.9	TAF9|PSMF1|USP19|TLK2|PARK7|UCHL5|MARCHF7	-0.27
GO Biological Processes	GO:1903312	negative regulation of mRNA metabolic process	-2.9	CCNT1|DHX9|FMR1|HNRNPA2B1|HNRNPC|SFSWAP|RNPS1|PCBP4	-0.27
GO Molecular Functions	GO:0003730	mRNA 3'-UTR binding	-2.8	FMR1|HNRNPA2B1|HNRNPC|CELF1|RNPS1|CPEB3|DAZAP1|PCBP4	-0.21
GO Biological Processes	GO:0043255	regulation of carbohydrate biosynthetic process	-2.8	AKT2|CLK2|GPT|PDK2|STK11|KAT2B|FAM3C|SORBS1	-0.19
GO Biological Processes	GO:0034214	protein hexamerization	-2.8	UGDH|YME1L1|LRRC8A	-0.19
GO Biological Processes	GO:0045913	positive regulation of carbohydrate metabolic process	-2.8	AKT2|GPT|PHKG2|STK11|KAT2B|SORBS1|PRXL2C	-0.19
GO Biological Processes	GO:0048025	negative regulation of mRNA splicing, via spliceosome	-2.8	HNRNPA2B1|SFSWAP|RNPS1|PCBP4	-0.19
GO Biological Processes	GO:0032386	regulation of intracellular transport	-2.8	AKT2|DHX9|IFI27|JUP|PCM1|MAPK3|STK11|SUPT6H|UBE2D3|SAE1|PARK7|AKAP8L|DMAP1|MFF|RIPOR1|REEP6|UBAC2|DENND10	-0.19
GO Biological Processes	GO:2001020	regulation of response to DNA damage stimulus	-2.7	CLU|DHX9|FMR1|ATXN7|TAF9|TPT1|UBE2V2|KAT2B|TRIP12|ZMPSTE24|BRD8|UCHL5|SUPT20H|DMAP1|WRNIP1|MARCHF7|FBH1	-0.14
GO Biological Processes	GO:1901264	carbohydrate derivative transport	-2.7	SCARB1|CD47|SLC19A1|ABCC5|SLC35A1|SLC35C2|LRRC8A	-0.14
GO Biological Processes	GO:1902992	negative regulation of amyloid precursor protein catabolic process	-2.7	BIN1|CLU|PICALM|RTN4	-0.14
GO Biological Processes	GO:0051503	adenine nucleotide transport	-2.7	CD47|SLC19A1|ABCC5|LRRC8A	-0.14
GO Biological Processes	GO:0051180	vitamin transport	-2.7	SCARB1|SLC19A1|TCN2|SLC5A6|ABCC5	-0.14
GO Cellular Components	GO:0097525	spliceosomal snRNP complex	-2.7	SNRNP70|TXNL4A|SF3B1|LUC7L3|PRPF39|LUC7L	-0.14
GO Cellular Components	GO:0000123	histone acetyltransferase complex	-2.7	ATXN7|TAF9|KAT2B|BRD8|ZZZ3|MBIP|SUPT20H|DMAP1	-0.14
GO Cellular Components	GO:0016281	eukaryotic translation initiation factor 4F complex	-2.7	EIF4A1|EIF4G1|EIF4G3	-0.14
GO Cellular Components	GO:1990124	messenger ribonucleoprotein complex	-2.7	FMR1|CPEB3|LSM14A	-0.14
GO Molecular Functions	GO:0031386	protein tag	-2.7	SUMO2|UBB|UBC	-0.14
GO Biological Processes	GO:0015868	purine ribonucleotide transport	-2.6	CD47|SLC19A1|ABCC5|LRRC8A	-0.11
GO Molecular Functions	GO:0072349	modified amino acid transmembrane transporter activity	-2.6	SLC19A1|SLC22A5|SLC5A6|ABCC5	-0.11
GO Cellular Components	GO:0005740	mitochondrial envelope	-2.6	ACADVL|ASS1|CLU|CYB5A|NIPSNAP2|IFI27|NDUFB6|PPOX|SDHC|SORD|UBB|UBC|DELE1|YME1L1|PARK7|GRAMD4|NNT|PISD|HIGD1A|PRELID3B|TMEM14C|CYCS|CHCHD3|AURKAIP1|FOXRED1|MFF|CARD19|ATAD1|MTG1|MRPL52|SLC25A48|LDHD	-0.11
GO Biological Processes	GO:0010675	regulation of cellular carbohydrate metabolic process	-2.6	AKT2|CLK2|GPT|PDK2|PHKG2|STK11|KAT2B|ZMPSTE24|FAM3C|SORBS1	-0.072
GO Biological Processes	GO:0006511	ubiquitin-dependent protein catabolic process	-2.5	ARNTL|ARRB2|IFI27|PCBP2|PSMA2|PSMB3|PPP1R11|UBE2D3|UBE2G1|UBE2H|USP5|MTA1|TRIP12|PSMF1|USP34|USP19|UCHL5|RNF126|RNF130|PCNP|DCAF11|SHARPIN|ZFAND2A|KLHDC3|AGAP3	-0.072
GO Biological Processes	GO:0015865	purine nucleotide transport	-2.5	CD47|SLC19A1|ABCC5|LRRC8A	-0.072
GO Biological Processes	GO:0046831	regulation of RNA export from nucleus	-2.5	DHX9|SUPT6H|AKAP8L	-0.072
GO Cellular Components	GO:0010369	chromocenter	-2.5	FMR1|SALL1|SCMH1	-0.072
GO Molecular Functions	GO:0086080	protein binding involved in heterotypic cell-cell adhesion	-2.5	CD47|CXADR|JUP	-0.072
GO Biological Processes	GO:0070875	positive regulation of glycogen metabolic process	-2.5	AKT2|PHKG2|SORBS1	-0.072
GO Cellular Components	GO:0005797	Golgi medial cisterna	-2.5	ST3GAL1|TMEM59|YIPF1	-0.072
GO Biological Processes	GO:1902229	regulation of intrinsic apoptotic signaling pathway in response to DNA damage	-2.5	CLU|TAF9|TPT1|MARCHF7|FBH1	-0.072
GO Cellular Components	GO:0031966	mitochondrial membrane	-2.5	ACADVL|ASS1|CLU|CYB5A|NIPSNAP2|IFI27|NDUFB6|PPOX|SDHC|SORD|UBB|UBC|DELE1|YME1L1|GRAMD4|NNT|PISD|HIGD1A|TMEM14C|CYCS|CHCHD3|AURKAIP1|FOXRED1|MFF|CARD19|ATAD1|MTG1|MRPL52|SLC25A48|LDHD	-0.065
GO Biological Processes	GO:0018205	peptidyl-lysine modification	-2.5	DHPS|ATXN7|SUMO2|TAF9|KAT2B|SAE1|ZMPSTE24|BRD8|PARK7|NCOA6|ZZZ3|MBIP|SUPT20H|ASH1L|DMAP1|SETD6	-0.063
GO Molecular Functions	GO:0016491	oxidoreductase activity	-2.5	ACADVL|ACOX1|CP|CYB5A|IDH3G|MTRR|NDUFB6|PAM|PPOX|SDHC|SORD|UGDH|ALDH4A1|FADS2|PARK7|ETHE1|NNT|PRDX5|DCXR|PCYOX1|CYCS|FOXRED1|OGDHL|JMJD4|KDM8|HSD3B7|ALKBH6|LDHD	-0.055
GO Biological Processes	GO:0016573	histone acetylation	-2.5	ATXN7|TAF9|KAT2B|ZMPSTE24|BRD8|ZZZ3|MBIP|SUPT20H|DMAP1	-0.045
GO Cellular Components	GO:0000124	SAGA complex	-2.5	ATXN7|TAF9|KAT2B|SUPT20H	-0.045
GO Biological Processes	GO:0018108	peptidyl-tyrosine phosphorylation	-2.5	CHKA|CLK1|CLK2|FGFR2|MAPK3|MAP2K7|ABI1|TESK2|CLK4|EPHA10	-0.045
GO Biological Processes	GO:0006109	regulation of carbohydrate metabolic process	-2.4	AKT2|CLK2|GPT|PDK2|PHKG2|STK11|KAT2B|ZMPSTE24|FAM3C|SORBS1|PRXL2C	-0.04
GO Cellular Components	GO:0140535	intracellular protein-containing complex	-2.4	ARNTL|FMR1|GTF2A2|POLR2I|PTPA|PSMA2|PSMB3|ATXN7|STK11|TAF9|TCEA1|UBE2V2|KAT2B|PSMF1|PCGF3|BRD8|CPEB3|ELP5|ZZZ3|CRCP|UCHL5|MBIP|SUPT20H|DMAP1|MAPKAP1|DCAF11|SHARPIN|FBH1|ZFAND2A|KLHDC3|PAXX	-0.04
GO Cellular Components	GO:1902493	acetyltransferase complex	-2.4	ATXN7|TAF9|KAT2B|BRD8|ZZZ3|MBIP|SUPT20H|DMAP1	-0.021
GO Cellular Components	GO:0031248	protein acetyltransferase complex	-2.4	ATXN7|TAF9|KAT2B|BRD8|ZZZ3|MBIP|SUPT20H|DMAP1	-0.021
GO Biological Processes	GO:1903050	regulation of proteolysis involved in cellular protein catabolic process	-2.4	CLU|FMR1|SUMO2|TAF9|UBB|USP5|PSMF1|USP19|TLK2|PARK7|UCHL5|MARCHF7|ZFAND2A	-0.021
GO Cellular Components	GO:0000138	Golgi trans cisterna	-2.4	ST3GAL1|TMEM59|YIPF1	-0.021
GO Biological Processes	GO:0031330	negative regulation of cellular catabolic process	-2.4	DHX9|EIF4G1|FMR1|GOLGA2|HNRNPC|SNRNP70|TAF9|PSMF1|USP19|TLK2|PARK7|ATRAID|UCHL5|MARCHF7	-0.018
GO Biological Processes	GO:0018212	peptidyl-tyrosine modification	-2.4	CHKA|CLK1|CLK2|FGFR2|MAPK3|MAP2K7|ABI1|TESK2|CLK4|EPHA10	-0.013
GO Biological Processes	GO:0018393	internal peptidyl-lysine acetylation	-2.4	ATXN7|TAF9|KAT2B|ZMPSTE24|BRD8|ZZZ3|MBIP|SUPT20H|DMAP1	0
GO Biological Processes	GO:0045861	negative regulation of proteolysis	-2.3	BIN1|ARRB2|IFI16|ITIH3|TAF9|PICALM|PSMF1|TMEM59|USP19|TLK2|PARK7|PRDX5|UCHL5|PIH1D1|MARCHF7	0
GO Molecular Functions	GO:0003727	single-stranded RNA binding	-2.3	DHX9|FMR1|HNRNPA1|HNRNPC|HNRNPDL|LSM14A|DAZAP1	0
GO Cellular Components	GO:0030532	small nuclear ribonucleoprotein complex	-2.3	SNRNP70|TXNL4A|SF3B1|LUC7L3|PRPF39|LUC7L	0
GO Biological Processes	GO:0006475	internal protein amino acid acetylation	-2.3	ATXN7|TAF9|KAT2B|ZMPSTE24|BRD8|ZZZ3|MBIP|SUPT20H|DMAP1	0
GO Biological Processes	GO:0042177	negative regulation of protein catabolic process	-2.3	SNRNP70|TAF9|PSMF1|USP19|TLK2|PARK7|ATRAID|UCHL5|MARCHF7	0
GO Biological Processes	GO:0015748	organophosphate ester transport	-2.3	SCARB1|CD47|SLC19A1|C2CD2L|ABCC5|PRELID3B|LRRC8A|OSBPL5|ATP11C	0
GO Biological Processes	GO:0090239	regulation of histone H4 acetylation	-2.3	ZMPSTE24|AUTS2|PIH1D1	0
GO Biological Processes	GO:0018394	peptidyl-lysine acetylation	-2.3	ATXN7|TAF9|KAT2B|ZMPSTE24|BRD8|ZZZ3|MBIP|SUPT20H|DMAP1	0
GO Biological Processes	GO:0043966	histone H3 acetylation	-2.3	ATXN7|TAF9|KAT2B|ZZZ3|MBIP|SUPT20H	0
GO Biological Processes	GO:0016570	histone modification	-2.3	ATXN7|TAF9|KAT2B|MTA1|HDAC5|ZMPSTE24|PCGF3|BRD8|PARK7|NCOA6|ZZZ3|MBIP|MIER2|SUPT20H|ASH1L|DMAP1|JMJD4|KDM8|SETD6	0
GO Biological Processes	GO:1903362	regulation of cellular protein catabolic process	-2.2	CLU|FMR1|SUMO2|TAF9|UBB|USP5|PSMF1|USP19|TLK2|PARK7|ATRAID|UCHL5|MARCHF7|ZFAND2A	0
GO Molecular Functions	GO:0048156	tau protein binding	-2.2	BIN1|CLU|DCTN1|SMAD2|PICALM	0
GO Biological Processes	GO:0031058	positive regulation of histone modification	-2.2	FMR1|PHF1|MAPK3|SF3B1|AUTS2|CHTOP|AKAP8L|PIH1D1	0
GO Cellular Components	GO:0140672	ATAC complex	-2.2	KAT2B|ZZZ3|MBIP	0
GO Biological Processes	GO:0032239	regulation of nucleobase-containing compound transport	-2.2	DHX9|SUPT6H|AKAP8L	0
GO Biological Processes	GO:0051645	Golgi localization	-2.2	STK11|STK25|RIPOR1	0
GO Biological Processes	GO:0046688	response to copper ion	-2.2	MT2A|PAM|SORD|PARK7	0
GO Biological Processes	GO:0034248	regulation of cellular amide metabolic process	-2.2	AKT2|BIN1|CLU|DHX9|EIF2S3|EIF4G1|FMR1|PDK2|PICALM|EIF4G3|QKI|RIDA|CELF1|CPEB3|ELP5|LSM14A|TRUB2|RTN4|JMJD4|MTG1	0
GO Cellular Components	GO:0071013	catalytic step 2 spliceosome	-2.2	HNRNPA1|HNRNPA2B1|HNRNPC|HNRNPM|RALY|SF3B1|SRRM2	0
GO Biological Processes	GO:1901983	regulation of protein acetylation	-2.2	ARNTL|MAPK3|ZMPSTE24|PARK7|SF3B1|AUTS2|PIH1D1	0
GO Biological Processes	GO:0006282	regulation of DNA repair	-2.2	DHX9|ATXN7|TAF9|UBE2V2|KAT2B|TRIP12|BRD8|UCHL5|SUPT20H|DMAP1|WRNIP1|FBH1	0
GO Biological Processes	GO:0035065	regulation of histone acetylation	-2.2	MAPK3|ZMPSTE24|PARK7|SF3B1|AUTS2|PIH1D1	0
GO Biological Processes	GO:1902230	negative regulation of intrinsic apoptotic signaling pathway in response to DNA damage	-2.1	CLU|TAF9|TPT1|MARCHF7	0
GO Biological Processes	GO:0034645	cellular macromolecule biosynthetic process	-2.1	AKT2|DHPS|DPAGT1|EIF2S3|EIF4A1|EIF4G1|GOLGA2|PHKG2|RPL34|RPS18|RPS25|ST3GAL1|ST3GAL4|UGDH|VEGFB|EIF4G3|FAM20B|OGA|CPEB3|ZDHHC1|ST6GALNAC6|SLC35C2|PIGX|AURKAIP1|GALNT11|ALG9|MRPL52|RPL22L1|DPY19L4	0
GO Biological Processes	GO:0030162	regulation of proteolysis	-2.1	BIN1|ARRB2|CLU|FMR1|IFI16|ITIH3|SUMO2|TAF9|UBB|USP5|PICALM|PSMF1|TMEM59|DELE1|USP19|TLK2|PARK7|GRAMD4|PRDX5|PACSIN3|UCHL5|CYCS|AURKAIP1|PIH1D1|RCN3|MARCHF7|ZFAND2A	0
GO Biological Processes	GO:0033127	regulation of histone phosphorylation	-2.1	FMR1|MAPK3|AKAP8L	0
GO Biological Processes	GO:0045722	positive regulation of gluconeogenesis	-2.1	GPT|STK11|KAT2B	0
GO Molecular Functions	GO:0005521	lamin binding	-2.1	IFI27|SYNE1|AKAP8L	0
GO Biological Processes	GO:0051052	regulation of DNA metabolic process	-2.1	ARRB2|ATF1|DHX9|HNRNPA1|HNRNPA2B1|HNRNPC|MAPK3|MAP2K7|ATXN7|SUPT6H|TAF9|UBE2V2|KAT2B|TRIP12|ZMPSTE24|BRD8|UCHL5|SUPT20H|DMAP1|WRNIP1|FBH1|STOX1	0
GO Biological Processes	GO:0051028	mRNA transport	-2.1	DHX9|FMR1|HNRNPA1|HNRNPA2B1|SUPT6H|QKI|NXF1|CHTOP	0
GO Biological Processes	GO:0006862	nucleotide transport	-2.1	CD47|SLC19A1|ABCC5|LRRC8A	0
GO Cellular Components	GO:0032994	protein-lipid complex	-2.1	BIN1|CLU|PCYOX1|LSR	0
GO Biological Processes	GO:0006099	tricarboxylic acid cycle	-2.1	IDH3G|SDHC|NNT|OGDHL	0
GO Cellular Components	GO:0005684	U2-type spliceosomal complex	-2.1	SNRNP70|TXNL4A|SF3B1|SRRM2|LUC7L3|PRPF39|LUC7L	0
GO Biological Processes	GO:0006749	glutathione metabolic process	-2.1	GSTA4|GSTM1|SLC1A2|PARK7|ETHE1	0
GO Molecular Functions	GO:0016765	transferase activity, transferring alkyl or aryl (other than methyl) groups	-2.1	DHPS|FDPS|GSTA4|GSTM1|GGPS1	0
GO Biological Processes	GO:0030212	hyaluronan metabolic process	-2	HYAL1|ITIH3|ABCC5	0
GO Cellular Components	GO:0120114	Sm-like protein family complex	-2	SNRNP70|TXNL4A|SF3B1|LUC7L3|PRPF39|LUC7L	0
GO Biological Processes	GO:0019080	viral gene expression	-2	DHX9|PCBP2|ST3GAL1|ST3GAL4|SPCS1	0
KEGG Pathway	hsa00900	Terpenoid backbone biosynthesis	-3.6	FDPS|GGPS1|RCE1|ZMPSTE24|PCYOX1	-1.1
KEGG Pathway	hsa04977	Vitamin digestion and absorption	-2.7	SCARB1|SLC19A1|TCN2|SLC5A6	-0.45
KEGG Pathway	hsa03040	Spliceosome	-2.4	HNRNPA1|HNRNPC|HNRNPM|SRSF5|SNRNP70|DDX46|TXNL4A|SF3B1|PRPF38B	-0.33
KEGG Pathway	hsa01524	Platinum drug resistance	-2.3	AKT2|GSTA4|GSTM1|MAPK3|AKT3|CYCS	-0.33
