# Supplementary material for: Sex differences in gene expression and alternative splicing in the Chinese horseshoe bat
Source: PeerJ. 2023 Apr 24;11:e15231. doi: 10.7717/peerj.15231 (PMC10135408; doi:10.7717/peerj.15231)
Supplement: Table S10 [file peerj-11-15231-s010.xlsx]

## Sheet: DEGs and DSGs
Brain-only DEGs_2775	Brain-only DSGs_1535	Brain-overlapped DEGs and DSGs	Liver-only DEGs_2027	Liver-only DSGs_846	Liver-overlapped DEGs and DSGs
AAMP	AARSD1	ABCA3	PFDN4	AMOTL2	SRRM2
ABCA12	ABCC5	ABCA7	ATP5MD	PTBP2	BCOR
ABCA13	ABCG4	ABCC8	SPON2	CIART	MED13L
ABCB10	ABHD5	ABHD10	UQCRQ	RETREG3	SRSF6
ABR	ABI1	ACHE	CEBPZOS	OSBPL5	ATP6V0A1
ACADL	ABI2	ACOT4	AFM	ARHGEF18	RPL22L1
ACKR3	ABITRAM	ACTN2	STRIP2	F13B	RCN3
ACY1	ABLIM1	ADCY2	CLC	IDH3G	NCOA6
ADAMTS16	ABLIM3	ADGRB2	LSS	HYI	ESD
ADAMTS20	ABRACL	ADGRL1	TLE6	FGG	SNRNP70
ADGRB1	ACAA1	ADGRL3	TMEM126B	CLASRP	DAB2
ADGRV1	ACAD9	AGAP1	SDR42E1	NFE2L1	CLOCK
ADPRM	ACADVL	AGAP3	MRPL33	YAP1	NDUFA9
ADPRS	ACAP2	AHDC1	COX7B	CDK16	UBR4
ADRA2A	ACAP3	AIG1	LECT2	STK11	IL1RN
AGBL3	ACCS	AIP	CLCN1	UBE2D3	HNRNPA1
AGL	ACD	AJM1	GSTM3	TXNDC9	MTG1
AGTPBP1	ACOX1	AKAP2	WDR72	CTSF	NEIL1
AIF1	ACP1	AKT2	CCND1	PISD	PARK7
AK1	ACSBG1	ALDH3B1	MRPL23	BHMT2	PLD3
AKAP1	ACSF3	ALG9	RAP1GAP	LANCL3	GLT1D1
AKIP1	ACSL6	AMPD2	NME7	PLBD1	APOC1
ALDH3A2	ACTN4	AMZ2	SNED1	PUS3	VEGFB
ALG14	ACTR3B	ANK2	MAB21L3	SH3BGRL	ZNF259
AMIGO2	ADAM17	ANKH	HINT2	ABCB11E	PZP
ANAPC13	ADAM22	ANKHD1	PDSS1	AKAP7	MIER1
ANGEL2	ADAP1	ANKRD10	ERICH3	AGPAT2	ANAPC13
ANGPT4	ADARB1	ANKRD46	ZSWIM7	EIF4G2	HSF2BP
ANK1	ADCK5	ANKS1B	GIMD1	EIF2S3	CYCS
ANKRD17	ADCY8	AOPEP	TRAPPC2L	ZNRF2	C1ORF210
ANO9	ADGRB3	AP1G2	ATP5F1E	PPP6R1	ASH1L
ANOS1	ADGRF5	AP2M1	RPL37	TK2	ZNF276
AOC1	ADGRL2	AP3S1	DPCD	UBE2H	HNRNPA2B1
AP2A1	ADNP	APBA1	COL26A1	UGGT1	NIT1
AP4E1	ADORA1	APBB3	RBP1	TMEM230	AURKAIP1
AP5S1	ADPGK	APLP1	ATG16L2	PSMF1	RPL34
AP5Z1	ADSS1	ARFIP2	RPL29	C9	WSB1
APOD	AFAP1	ARHGAP21	CSKMT	GAMT	ABCB4
APOLD1	AFDN	ARHGAP39	POLE4	UBE2G1	TXNRD1
APPL2	AFF2	ARHGAP5	LSM3	ANAPC16	FBXW5
AQP1	AFTPH	ARHGEF11	RPL23A	AKT3	SRSF11
AQP4	AGA	ARID1B	COX14	ADAM1A	ELOF1
AREL1	AGFG1	ARL3	METTL6	CPNE2	MRPL11
ARFIP1	AGO1	ARL6IP5	PBDC1	FGFRL1	RGS14
ARHGAP1	AHSA1	ARMC5	OCC1	SLC22A9	RBIS
ARHGAP15	AHSA2	ARMC8	GAS8	CHCHD3	COMMD6
ARHGAP36	AJAP1	ARMCX4	EFCAB11	C1RL	MTX2
ARHGAP45	AK4	ASH1L	C12ORF76	STAB2	HNMT
ARHGEF25	AKAP11	ASTN1	BTF3	LGALS1	ITIH1
ARHGEF4	AKAP8L	ASTN2	CKS2	PSMC3	C4A
ARID1A	AKAP9	ATAD1	TMEM25	HERC4	TPD52L1
ARIH2	AKT3	ATAT1	CCDC12	CTSC	ACP1
ARL8B	ALDH4A1	ATF6B	KYAT3	CRYZ	DECR2
ARMC6	ALDH5A1	ATG2B	CFHR5	YIPF1	COPZ2
ARSA	ALDH6A1	ATP11C	TRIM38	TMEM269	MT2
ASAH1	ALG11	ATP13A2	KRTCAP2	FOXJ3	PON1
ASMT	ALKBH6	ATP2B2	TIMM10B	ZMPSTE24	PSMA2
ASNSD1	ALS2	ATP2B3	RGS8	STK24	CNIH1
ASPN	AMDHD2	ATP5ME	CCDC102A	ASS1	PHYH
ATG5	AMFR	ATP5PD	UQCC3	TRUB2	NTAN1
ATM	AMPH	ATP6V0B	POLR3GL	ORM1	USE1
ATP13A1	AMY2A	ATP6V1C1	VKORC1	GALM	TXNDC17
ATP1B2	ANAPC5	ATP6V1D	ABHD10	TMEM62	GPX3
ATP2A1	ANK3	ATP6V1H	ATP5MPL	AP3S1	ZDHHC1
ATP5MF	ANKMY1	ATPSCKMT	HSPB2	DHRS3	TMEM59
ATP5MG	ANKRD12	ATXN2	FAAP20	LIPC	KYAT1
ATP6AP2	ANKRD13B	ATXN7L2	DNASE2	ZNF106	GYAR
ATP6V0C	ANKRD13C	AUH	SPR	BHMT	KLHL23
ATP6V0E2	ANKRD13D	B4GALNT1	POLR1H	SLCO2A1	SLC22A5
ATPAF2	ANKRD23	BAG6	SMCO4	AGXT2	ATP5MC3
AZGP1	ANKRD44	BCAR1	OGT	MARCHF6	CAMLG
B3GALT5	ANKRD52	BCAS1	ITPA	HSP90B1	CCNYL1
B3GAT1	ANKRD6	BCAT1	NDUFA8	GNMT	NDUFS4
B3GNTL1	ANLN	BCL9L	ATP23	SLC31A1	IQUB
BAIAP2	ANO4	BEND6	MRPS33	DHRS7	POLR2I
BCKDHA	ANO5	BHLHB9	MRPL47	CLK1	DCP1A
BCL11A	ANXA6	BMT2	PPIA	ARMCX3	DCXR
BCL11B	AOC2	BOP1	WDR41	PRRC2C	FBP1
BCL2L2	AP1AR	BRD4	URAH	ULK2	PSMB3
BCL6	AP1B1	BRINP1	PEX11B	DMAP1	ENY2
BCL7B	AP1S2	BRPF3	TRAPPC4	ALG9	PPP1R7
BMP4	AP3D1	BSDC1	SEC31B	DNAJC16	RNF126
BNIP3	AP3S2	C1ORF198	PABPN1	GTF2F1	TMEM205
BPIFA1	APBB1	C20ORF194	LAMTOR5	FRMD4A	SGK2
BRCA2	APBB2	C2CD2L	MFSD12	PRPF39	IL13RA1
C11ORF24	APC	C2ORF49	ACP6	ACBD4	RCN2
C12ORF76	APC2	C9ORF43	ZNF783	MAP2K7	PEMT
C15ORF40	APEH	CA9	KIF3C	CLTCL1	MRPL13
C1ORF52	APP	CABIN1	RPL35	STK19	RPL12
C1ORF53	ARFGAP1	CACNA1G	MRPS28	RCE1	SCLY
C1QL1	ARFRP1	CACNA2D1	AP2S1	PRRC2A	BDH2
C1QTNF4	ARHGAP12	CALY	ZNF248	SHARPIN	RPL9
C21ORF62	ARHGAP26	CAMK2A	PTS	AMBP	PRXL2A
C2CD5	ARHGAP33	CAMK2B	TTC39C	FAM20C	SLC39A14
C2ORF42	ARHGEF10	CAMTA1	TARS2	MAN2C1	LRRC8A
C6ORF62	ARHGEF10L	CAMTA2	PTMS	CACUL1	ATN1
CACNA2D4	ARHGEF12	CARMIL1	LAMTOR4	TBCEL	ETHE1
CACNG3	ARHGEF40	CCDC88A	COQ2	EMC10	ARNTL
CALM1	ARHGEF7	CCDC9B	CYB5B	MFSD11	RPS16
CALML6	ARIH1	CCM2	EXOSC7	TMEM11	UQCRH
CALN1	ARL2	CCNI	CEACAM1	GNAS	TMEM14C
CAP1	ARL2BP	CCNL2	RPLP2	RAB4A	PTPA
CAPNS1	ARL6IP4	CCNT1	PEX12	CD74	GARNL3
CARS1	ARMC1	CCNT2	COMMD5	SUPT20H	DENND1A
CATSPER2	ARMCX5	CELF2	CCSMST1	R3HDM2	PRDX5
CAVIN3	ARNTL	CELF4	ZNF658	CCNT1	KIAA2026
CC2D1B	ARPC1A	CENATAC	PSMC6	TPM1	NFIC
CCDC105	ARPP21	CEP170B	PSMC2	DAZAP1	USP54
CCDC167	ARRB2	CERS4	RPL36	BCLAF1	RIN3
CCDC17	ARRDC2	CIC	NSA2	SCARB1	POR
CCDC175	ARVCF	CIZ1	KAT8	MAPK14	ELL2
CCDC60	ASS1	CLASP1	SPTSSA	AFDN	TARBP2
CCDC71L	ATF1	CLIP2	BTK	DENND10	NCOA2
CCL19	ATF6	CLIP3	SAP18	ABCG8	MLXIPL
CCND2	ATN1	CLK4	TRMT10C	PPM1B	PTP4A1
CCNYL1	ATP10A	CLTC	MTX3	SFXN1	ILRUN
CCSER2	ATP1B3	CLVS1	SLC39A8	DELE1	RPS18
CD19	ATP2B1	CMAS	MRPL51	ACSM5	FTCD
CD200	ATP2B4	CNEP1R1	RTN3	REX1BD	GGT1
CD244	ATP6V1B2	CNNM1	CDK5RAP3	USP7	GAREM1
CDC25C	ATP8A1	CNTRL	ELP2	PALB2	SHBG
CDCA2	ATP9A	COMMD3	NEDD8	IFI27L1	PDCD5
CDCP2	ATR	COMMD7	MRPS18C	YPEL1	PNPLA2
CDH17	ATRAID	COPS7A	WDR11	ERICH1	IL6ST
CDH4	ATRX	CORO2B	RPS10	KNG1	TMEM87B
CDK10	ATXN1L	CORO6	SLC12A6	RCL1	RBM5
CDK11B	ATXN7	COX10	CALCOCO1	SLC38A4	ST3GAL1
CDK9	AURKAIP1	CPSF6	GPAT4	NDRG2	FIGNL1
CDKL1	AUTS2	CRCP	DAZAP2	ST3GAL4	RPL10
CENPV	AVPI1	CREG1	SNAP23	MBD1	NR5A2
CEP41	AZIN2	CRTC1	ATP6AP1	CRIP3	NR1H4
CEP78	B3GALT1	CSRNP2	RALGAPB	PLEKHH3	ATP5F1D
CFAP36	B4GALNT4	CTNNA2	ACTB	PFKFB1	INSR
CFAP97	B4GALT6	CTNND2	MROH1	SLC30A10	MIER2
CFH	BACE1	CUL4A	BAP1	TARBP1	TAF10
CGN	BAK1	CUX1	UNC93B1	TLK2	SAT2
CHMP1B2	BAP18	CYCS	TAOK1	IRAK2	PGGHG
CHMP5	BBS12	CYFIP2	PLCB1	CCNL2	GSTA4
CHRM1	BBX	CYP46A1	AFF1	C19ORF47	TADA2B
CHRNB2	BCCIP	DAG1	LAMC1	SLC4A2	NCAPH2
CHST12	BCL2L11	DAGLA	ZFAND5	FMR1	MRPL52
CHST13	BCL2L13	DCAF5	TOP1	THOC5	NCOR2
CHURC1	BEAN1	DCTN1	ATP13A1	ARFIP1	ATXN7
CIB2	BEGAIN	DDX17	PER1	SLC35C2	FMO4
CIITA	BEND5	DDX39B	SGPL1	TAF9	CCDC167
CLASRP	BET1	DEDD2	STRN	CAMTA2	VCAM1
CLCN3	BIN1	DENR	WWP1	TFG	PTP4A2
CLSTN1	BLOC1S6	DGAT1	TOR1AIP1	TMEM104	ANKRD11
CMTM6	BMERB1	DGCR2	STK10	CLK2	NUDT7
CNOT3	BMP1	DIXDC1	E2F5	FDPS	RAPGEF2
CNOT6L	BNIP1	DLG4	MCCC2	RBM39	FASTKD5
CNTFR	BOD1	DLGAP1	PLIN5	PARP3	VPS25
COA5	BORCS8	DLGAP4	RALGDS	TSPYL2	SUPT6H
COA6	BPTF	DMWD	ZXDB	CXADR	ANKRD17
COL24A1	BRD1	DNAJB14	HTT	LIN54	PSKH1
COL2A1	BRD8	DNAJB5	CHRM2	PCGF3	GK5
COL3A1	BTBD3	DNM1	YTHDF3	FGFR3	PPFIBP1
COLEC10	BTF3L4	DNM1L	PELI1	LDB2	TRAPPC12
COMMD6	BTRC	DPCD	ASCL1	SULT1D1	TM2D3
COPRS	C16ORF70	DPM2	MGARP	ITIH2	PTBP3
COPS2	C17ORF113	DPP6	MYL6	TNS2	HNRNPA3
COPS5	C18ORF25	DSCAML1	ATP5ME	KDM8	TEX30
COX14	C7ORF26	DTX1	HSD17B2	IKBIP	SEC14L1
COX16	C7ORF57	DVL1	RPS28	TENT4B	RPS24
COX5A	CA11	E2F4	HBA	CYP1A2	SORBS1
COX6A2	CA3	EDC4	RPL37A	CHKA	UBC
CPQ	CAB39L	EFCAB2	HSD17B12-B	ABCC5	MLH3
CRTAP	CACFD1	EHMT2	TEFM	ZNRD2	PLEKHM1
CS	CACNA1B	EIF3C	NR1I2	CTNND1	MBL1
CSNK1G2	CACNA2D2	EIF4A1	RPS21	PACSIN3	SNRPC
CST6	CACNA2D3	EIF4B	FMC1	PAXX	CLK4
CSTF2T	CACNB4	EIF4H	ITPRID1	SERPINA5	ASPG
CXCL10	CADM1	EIF5A	JCHAIN	EIF4G3	RPS25
CXXC5	CADPS	ELF2	GLRX2	KLC1	AKT2
CYB5B	CALB2	ELFN2	TOMM7	SRSF5	NDUFA3
CYBRD1	CALCOCO2	ELMO1	PCBD2	MTSS2	MRPS14
D1PAS1	CAMK1	ELOF1	RNF187	BRD9	STX8
DACT1	CAMK1G	EML5	ABCC11	HACE1	IGF1
DAZAP2	CAMK2D	EMSY	NSDHL	CILK1	TYMP
DBI	CAMK4	EPB41L1	ZNF185	TREX2	RPL22
DCAF12	CANX	EPHB1	KLHDC7A	SLC26A8	NCOA4
DCTN6	CAPN10	EPS15	APOA2	CFB
DENND1B	CAPN15	ERI3	AOX3	SLC5A6
DGKZ	CAPRIN2	ERMP1	NDUFA1	SF3B1
DHCR7	CARD19	ETV1	DDX11L8	PRPF40A
DHH	CASK	EVI5	MPHOSPH6	COL18A1
DHX15	CASP3	EXOC2	TMEM238	CBR1
DHX34	CASTOR2	EXOC6B	RPS29	PAH
DHX36	CBLN2	FADS1	RPS27A	HIGD1A
DHX40	CBS	FADS2	ATP5MG	CYP2D17
DHX57	CBX7	FAHD2A	CLTRN	GSTZ1
DIPK2A	CCDC184	FAM13C	PRR15L	HPD
DISP1	CCDC25	FAM160B2	RECQL4	ABHD4
DKKL1	CCDC82	FAM162A	RPS23	COPS2
DLGAP2	CCDC85A	FAM189A1	HBB	NOSTRIN
DLX1	CCDC93	FAM193B	GOLT1A	ASGR2
DMKN	CCNL1	FAM53A	CFAP46	SULT1A1
DNAJC13	CCP110	FASN	SEC61G	HPX
DNAJC3	CCT8	FASTK	SNRPD2	C2CD2L
DNASE2	CD46	FAXDC2	COX16	ASGR1
DONSON	CD47	FBH1	SSR4	ECI2
DPP10	CD63	FBXL16	EFCAB3	ITIH4
DRGX	CD81	FBXL2	LSM7	PIPOX
DUS4L	CDAN1	FDX1	HSPB11	PON2
DUSP1	CDC42BPA	FGFR2	CYP1A5	TF
DUSP13	CDC42SE2	FLNB	RPL31	PDLIM5
DUSP8	CDH10	FLOT2	TMPRSS7	REN
DVL3	CDH9	FN3K	BUB1	ARF3
DYNC1H1	CDIP1	FNBP4	ZNF213	HAL
DYNLRB2	CDK19	FOXJ3	CA11	NXF1
DYRK1B	CDK20	FOXP1	HPF1	KIF1C
DZANK1	CDK5	FXYD6	RPS27	GLS2
EBF2	CDPF1	FYN	NDUFA2	APOC3
EBP	CDR2	GABBR2	ATOX1	SLC30A2
EEF1B2	CDYL2	GABRA3	TM4SF4	CYP2C21
EEF2	CELF1	GALE	EBP	PROZ
EFEMP1	CELF5	GATD1	IGFBP2	SHFL
EGFEM1	CEP120	GDI1	GSTO1	NOXO1
EGFL6	CEP126	GFRA1	SLIRP	MTA1
EHD3	CEP164	GFRA2	GREB1L	SERPINA13P
EIF2S2	CEP170	GGCX	NDUFA12	SERPINA1
ELFN1	CEP295	GGPS1	TRAPPC2	ASL
ELL2	CEP95	GLMN	COPS9	SULT3A1
ELMOD2	CFAP100	GLT1D1	PET100	PRPF38B
EMC10	CGNL1	GMFG	ASIC1	GLI4
ENHO	CHAF1B	GNAS	MRPL42	JMJD4
ENPP2	CHCHD3	GNB1	CCDC58	UBE2E3
EPHA2	CHCHD7	GOLGA2	PDGFA	RABGEF1
ERBB3	CHD2	GOLM2	HINT1	CYP2C18
ERC1	CHD3	GOLT1B	LDHB	PHAX
ERCC6L2	CHD6	GPAT3	COX6C	IGSF9
ERP29	CHD7	GPM6A	COLCA2	SLC19A1
ESD	CHKA	GPR137C	METAP1D	CPEB3
ETF1	CHKB	GPR155	RPL39	TLCD2
ETFA	CHL1	GPR158	SLC25A34	PTBP1
ETNK1	CHMP3	GPS1	STAT5A	CRK
EXOSC6	CHN1	GPT	MGST2	MME
F13B	CHPT1	GRAMD1B	NDUFC2	FAM3C
FAM120C	CHRND	GRID1	NDUFB4	HGFAC
FAM155A	CHST1	GRIN1	TAMM41	HNRNPH3
FAM171A1	CHTF8	GRINA	NDUFA13	SEMA4G
FAM184A	CHTOP	GRM7	L3MBTL1	GNE
FAM193A	CIAO2B	GSK3B	MAGOHB	CYP4F3
FAM20C	CIT	GSTA4	PLA2G12B	CYTH2
FAM219A	CITED1	GTF2E1	RPS8	EXOC1
FAM234A	CKB	GUK1	CMTM7	ARL6IP4
FAM76B	CLCC1	HACD2	MICOS10	KLHL12
FAM83G	CLCN2	HCFC1	MED21	JUP
FAM8A1	CLK1	HEPACAM	MALSU1	SEC11A
FAM92A	CLK2	HERC3	SPACA6	ATP8B3
FANCM	CLPB	HIPK1	HHIPL2	TRIO
FAT4	CLU	HIPK2	CCDC159	MCRIP1
FBLN1	CMIP	HK1	MAP2K6	NAA35
FBP1	CNBP	HMGN3	FBXL2	ZMYND11
FBXO5	CNIH1	HMGXB3	RFESD	TRIP12
FDFT1	CNOT2	HNRNPA1	CMC1	SLC2A9
FEM1A	CNPY2	HNRNPA2B1	UQCC2	SEC31A
FEM1B	CNTN2	HNRNPH1	LGALS2	ARGLU1
FGFR1	COA7	HNRNPK	RPL32	TSNAX
FHL5	COASY	HNRNPLL	CD22	TNFAIP3
FIGLA	COBLL1	HPCA	ATP5MC1	CHPT1
FIGNL1	COG1	HSD3B7	HYPK	NFATC1
FKBP3	COL23A1	HTRA2	ATP5MF	TMEM242
FNDC10	COL27A1	HUWE1	CDKL1	C11ORF24
FOCAD	COL7A1	IARS1	ADH5	AKAP8L
FOSL2	COL9A2	IDH3G	SYCP1	SCMH1
FOXA3	COMMD2	IFI27	SORBS2	ST6GALNAC2
FOXL3	COMMD5	IGSF21	IDNK	DDX6
FOXN3	COPE	ILRUN	MRPL21	RNPS1
FZD10	COPS7B	INTS10	DMAC1	STK25
G6PD	COPS8	INTS8	LYPLAL1	FBH1
GABPB2	COQ6	IQSEC1	COX6B1	ENTPD8
GABRA5	COQ8B	IQSEC3	RPL38	NAXD
GAK	COX20	IRAK1	PRSS36	MRTFA
GAN	CP	ITGA2B	ESPL1	NNT
GAPVD1	CPEB1	ITPA	CISD1	HNRNPC
GBP1	CPEB3	JUP	B3GALNT1	MOCS2
GBP6	CPNE2	KAT2B	SEC61B	MTRES1
GDE1	CPNE6	KCNIP2	ACVR1C	CDO1
GET4	CPSF4	KCNN1	CCDC152	HAGH
GK	CRACDL	KCNT1	PSMB7	NECAP1
GKAP1	CRAMP1	KCNT2	RAMP1	CDC42EP1
GMNN	CREBRF	KCTD1	MRPL36	STAT1
GNAO1	CRELD1	KIF1A	SH3TC2	APOE
GNG7	CRHR1	KIFC2	VWA7	ARG1
GNL3L	CRIM1	KIRREL3	HLA-DMA	LUC7L3
GPAA1	CRY1	KLC1	COX7A2P2	NUB1
GPATCH2L	CSRP1	KLC2	TBCA	P4HB
GPI	CTBP1	KLHL3	BOLA3	HYAL1
GPR152	CTBP2	KLHL36	ZNF256	NDUFS8
GPR162	CTIF	KNDC1	GBA3	APOA1
GPR26	CTU1	LARGE1	RPAIN	NCDN
GPR27	CTU2	LAS1L	PER3	PPP1R11
GPR84	CUL1	LENG8	EXOSC5	TXLNA
GPRC5A	CUTA	LINGO1	NUDT2	LAPTM4A
GPRIN3	CX3CL1	LMO4	TBC1D7	RAB10
GRAMD1A	CXADR	LPCAT4	RFXAP	ATRAID
GRIN2B	CYB5A	LRP1	TRAPPC6A	MEMO1
GSX2	CYRIA	LRRC40	ERG28	HAAO
GTF2IRD2B	CYRIB	LRRC56	BRAWNIN	USP34
H2AZ1	CYTH3	LRRC8A	C9ORF16	AFTPH
HABP4	CZIB	LSM14A	FAM193B	PCYOX1
HAL	DAB1	LUC7L	KLHL17	SUCLG1
HARS1	DAPK1	LUC7L3	SARM1	SP3
HDAC1	DAPK3	LY6E	PHPT1	KYNU
HDAC8	DAZAP1	LY6H	POP5	SLC38A3
HEATR1	DBN1	LYNX1	DBI	NIT2
HEATR4	DBX2	LYRM7	CDK1	CD47
HELB	DCAF11	MADD	NDUFB5	LRRC58
HGSNAT	DCAF15	MAP1A	TMEM60	SEC22A
HINT1	DCAF8	MAP1S	TXN	ATP13A3
HLX	DCDC2B	MAP2K7	ADA2	RWDD3
HMGA1	DCLK2	MAPK11	TRA2A	IL1RAP
HMGN1	DCTN3	MAPRE2	RFC3	ATAD1
HNRNPA3	DCXR	MARCHF7	TMEM147	TC2N
HNRNPU	DDHD1	MARK2	CYP51A1	GRID2IP
HPF1	DDHD2	MATN2	GHDC	CREBRF
HS6ST1	DDR1	MBIP	TCEAL2	KIAA1191
HSD17B8	DDR2	MBNL1	TMEM167A	KMO
HSPB11	DDX46	MBNL2	VAMP5	RNF130
HSPD1	DDX49	MCFD2	ZPBP	SLC25A48
HTRA1	DELE1	MED27	RPL23	BIN1
IDUA	DENND10	MEF2D	RPL27	TRPC4AP
IER3IP1	DENND1A	MEIS2	ECE2	MRAS
IER5L	DENND6B	METAP1D	PFDN5	ACAD11
IFT80	DGKG	MFN1	NDUFB11	GC
IGBP1	DHDDS	MFSD11	SLC25A26	MS4A6A
IKZF3	DHPS	MIEF1	MRPL18	ALDH1A1
IL1RN	DHX9	MISP	SLC44A4	PROS1
INA	DIO2	MLF2	CIRBP	HSD3B7
INSIG2	DIP2B	MLH1	MRPL54	NET1
IRF2BPL	DISP2	MLLT1	FLACC1	UPP2
ITGA6	DKK3	MLX	EXOSC8	CD302
ITGB7	DLG1	MMS19	ARHGAP25	FBXW8
ITPKA	DLG2	MMTAG2	TMEM18	ADK
ITPRIP	DLG5	MPHOSPH6	NDUFAF5	ZFAND2A
ITSN2	DMAP1	MPP5	SLC22A13	GAS2L1
JAK1	DMD	MPPE1	CEP20	PROC
JAML	DMTF1	MRPL23	APBB3	SLC41A3
JHY	DMXL1	MRPL4	RBM45	PLG
JRKL	DNAJA3	MRPL48	RPS12	PCBP2
JUND	DNAJC12	MRPL52	MFSD4A	MBIP
KCNC3	DNAJC16	MTA1	FDX2	YME1L1
KCNIP3	DNAJC6	MTA3	RASSF2	ACSL1
KCNK1	DNAJC7	MTSS2	IMMP1L	COP1
KCNQ3	DNER	MTX3	OTUD6B	MPZL1
KCTD12	DNMT3A	MXRA7	DACT2	TANC1
KCTD5	DNPEP	MYADM	IFTAP	UBE2E1
KDF1	DOC2G	MYH14	PPCDC	MTRR
KDM3B	DOCK3	MYO18A	BEX4	ZNF654
KDM6A	DOCK6	MYO3A	DYNLT2	BMERB1
KERA	DOK4	MYRIP	MGMT	DENND5B
KIAA0040	DOP1A	NACC2	COL5A2	GGPS1
KIAA0513	DPAGT1	NAE1	DZIP3	PIGX
KIF17	DPF1	NAP1L4	MRPL43	SMAD2
KIF23	DPF2	NCAM1	TMEM218	RIDA
KIFBP	DPH1	NCDN	ATP5PO	SDHC
KLC3	DPP3	NCKAP1	SMIM20	AGXT
KLHL12	DPY19L4	NCOA1	PRDX4	KHK
KLHL30	DRAP1	NCOA6	C1ORF53	ACOX2
KLHL41	DROSHA	NDFIP1	RPP30	VAMP7
KLK1	DRP2	NDRG2	NUDT5	SND1
KMO	DTNA	NDUFAF4	NDUFB8	KLKB1
KNL1	DTYMK	NDUFB6	DIPK1A	TRIM44
KRT18	DUS1L	NDUFV3	SELENOF	FGFR2
KRT20	DUS2	NECAB1	HEMK1	ACTR3B
KRT80	DUS3L	NEO1	GNG5	HDAC5
KRTCAP2	DUSP22	NFIB	ZSCAN4	CERS2
L3MBTL1	DUSP23	NFIX	RMDN1	WIPI2
LACC1	DYNC2LI1	NLE1	ATP5PD	PSMD9
LAMTOR4	DYRK1A	NLGN3	STOML1	DGAT2
LAPTM5	DYRK4	NOLC1	CEBPA	C4BPA
LETM1	DZIP3	NPDC1	NAT1	USP25
LETMD1	ECI2	NRGN	TSPAN15	GCSH
LGALS4	EDIL3	NRXN1	MCEE	GALNT11
LGI1	EEFSEC	NRXN3	PIN4	FGD6
LGI4	EFCAB7	NSMF	CLCN2	ASCC2
LHFPL3	EFL1	NTM	FAM92A	CZIB
LIMK2	EGLN2	NUDT14	C20ORF27	REEP6
LIPE	EHBP1	NXF1	POLR2G	XRN2
LIPM	EIF2S3	OCEL1	POLE	ABHD5
LMTK3	EIF3H	OGT	GABARAPL2	KDELR1
LRP10	EIF3L	OPALIN	EDA	GAS2
LRP3	EIF4A2	ORC3	ULK3	PRXL2C
LRRC10B	EIF4G1	OSBPL2	MGAT4D	CRYL1
LRRC3	EIF4G3	OSBPL8	OXSM	EIF4G1
LRRN1	EIPR1	P4HTM	DEPDC7	RNF128
LSM7	ELAPOR1	PABPN1	HSD17B8	GPX4
LTN1	ELAVL4	PAFAH1B1	ZNF283	CTSH
LYN	ELMO2	PAN3	HDHD3	RILP
LYRM4	ELP1	PARP11	IL18	PANK1
LZTS3	ELP3	PATL1	TMEM126A	PDK2
MAEA	ELP5	PC	C6ORF163	AMDHD1
MAGED1	EMC9	PCBD2	MRPL27	TOX4
MAGT1	EMG1	PCDHGC4	DERL2	ERGIC1
MAL2	EML3	PCNX4	PFDN1	HNRNPDL
MAN1B1	ENAH	PCYOX1	CARD9	SLC25A15
MANSC1	EOLA1	PCYT1B	STRA6L	UGT2B31
MAP1LC3B	EPB41L2	PDE1C	RPL7	ITIH3
MAP2K1	EPB41L3	PDE6B	LYRM2	CD36
MAP3K5	EPC2	PDK2	ZNF565	F2
MAP6	EPHA10	PEX11B	CCDC107	LAPTM4B
MARCO	EPHA5	PFDN1	ZNF181	ATG4A
MAST2	EPHB3	PHF12	RMI2	ESRRA
MAT2A	EPHB6	PHF21B	SNRPA1	B3GALNT2
MBD2	EPHX1	PHF6	UQCR10	MAOB
MCF2	EPS8	PIGF	TRIM68	ALB
MDFIC2	ERAL1	PIGT	COX20	RUFY2
MDM4	ERBIN	PIGU	ATPSCKMT	RPS11
MED13L	ERC2	PIP4K2B	RPS17	RCBTB1
MED16	ERCC3	PIP5K1C	FTCDNL1	GCGR
MED21	ERCC8	PITPNM1	PFN3	XPNPEP1
MED22	ERICH1	PJA2	PPP1R35	UGDH
MED24	ERICH2	PKD2L1	NDUFB1	ADCK2
MEGF8	ERMARD	PKIA	RAB17	CHD9
MEN1	ETHE1	PKM	SRI	DYM
MESP1	EXOC1	PKP4	MAIP1	RSL1D1
METAP1	EXOC7	PLAA	JRKL	CFI
MEX3D	EXOSC7	PLD3	MICOS13	OSBPL10
MFGE8	EXT2	PLEC	SCML1	SLCO1A2
MFN2	FAAH	PLEKHM2	PFDN6	SLC47A1
MFSD4B	FAIM	PLPP1	RPL35A	TAT
MICOS10	FAM107A	PLPP4	MED30	MAOA
MINDY4	FAM117A	PLPPR2	BORCS7	OSBPL1A
MITF	FAM126B	PLXNC1	POLR2F	BSDC1
MKLN1	FAM135A	PNP	TIMM17A	CCDC91
MLST8	FAM135B	POGLUT1	SSBP1	XBP1
MMCM3	FAM168A	POLR1H	MYNN	SPCS1
MN1	FAM168B	POLR2E	MMAB	CP
MNS1	FAM174B	POLR2F	DBNDD1	ATF1
MOB3A	FAM185A	POP5	RPL24	ABCA6
MON1A	FAM20B	PPCDC	SELENBP1	PRELID3B
MOSPD3	FAM3C	PPFIA1	RHOBTB3	ATP9B
MPST	FAM98C	PPFIA3	RTN4IP1	CYB5A
MRPL12	FANCE	PPIB	NTPCR	A1CF
MRPL13	FANCL	PPP1R11	MAP1LC3B	ST6GALNAC6
MRPL14	FAR1	PPP1R1A	COX17	AFMID
MRPL33	FAT1	PPP1R1B	ERI3	ACOX1
MRPL38	FAXC	PPP1R9B	CDK7	AKAP10
MRPS14	FBF1	PPP2R2B	ANAPC11	RNF125
MS4A15	FBRSL1	PPP3CB	TATDN1	DPYD
MS4A7	FBXL3	PPP4R4	MRPL19	FGA
MSANTD4	FBXL6	PPP6R1	CD19	SLC12A4
MSH2	FBXO15	PPP6R2	THYN1	UBE2V2
MSI1	FBXO25	PQBP1	TTR	PLXNB1
MSN	FBXO38	PRDM8	TMEM199	UBXN8
MT3	FBXO41	PRDX5	HMGN5	GK
MT-CO1	FBXO44	PREPL	NDUFAF6	SUMO2
MT-CO2	FBXO6	PRICKLE4	ILKAP	USP5
MT-CYB	FBXO7	PRKCG	GOLT1B	ZFAND6
MTERF3	FBXW11	PRKCZ	FKBP3	PXMP2
MTF2	FCGR1A	PRPF18	ABCC10	MAPKAP1
MTFR1L	FCHO1	PRPF4B	NADSYN1	SLC17A4
MTFR2	FDPS	PSMA2	C7ORF50	C6
MT-ND1	FDXR	PSMB1	COX15	ALS2
MT-ND4	FEZ1	PSMB3	YPEL5	EIF3E
MTOR	FGD6	PSMB7	ZNF554	RBPMS
MTREX	FGF1	PSMF1	ARMCX5	OGDHL
MTX2	FHAD1	PSMG1	NTMT1	RABL3
MUC17	FHL1	PTGDS	NDUFA7	ELP5
MYH9	FHOD3	PTMS	MRPL50	NR3C1
MYO15A	FKBP1A	PTPA	COX7A1	WDR81
MYO1A	FKBP7	PTPRN2	CETN3	LGR4
MYOZ3	FLAD1	PTPRS	TMED8	DGCR2
N4BP2L2	FLOT1	PYM1	TUBGCP5	PHF21A
NAMPT	FMNL2	QPCT	NOXA1	ALDH1L1
NANOS3	FMR1	R3HDM2	UNC50	FAM91A1
NBEAL1	FNBP1	RAB18	SAP30	TLE5
NCOR1	FNBP1L	RAB40C	MED11	SORD
NDUFA7	FNTA	RALGDS	SMDT1	SNX2
NDUFAF2	FOXN2	RANBP3	RPL27A	HSD17B4
NDUFAF5	FOXRED1	RANBP9	CUTA	CHTOP
NDUFB4	FRMD5	RASGEF1C	FGFR4	TCAIM
NEUROD2	FRMD6	RASSF4	RPS20	CPS1
NFE2L1	FRMPD1	RBBP5	MRPL14	TCN2
NFKBIL1	FRMPD3	RBFOX3	TMEM19	EMC2
NFYC	FRRS1L	RBM12	PRKN	SLC22A18
NGFR	FSD1L	RBM26	TMEM160	CFH
NHP2	FSTL4	RBM45	JAML	UCHL5
NIF3L1	FSTL5	RCN2	NAE1	F5
NIFK	FTO	REEP2	MRPS6	ITGAL
NKAP	FUBP3	REEP5	FIGNL2	COMMD2
NOC4L	FUZ	REEP6	JRK	LSR
NOMO1	GABBR1	RELT	SMIM30	SETD6
NOVA1	GABRA2	RETREG3	FBXO10	ERO1B
NPAS2	GABRA6	REX1BD	C21ORF58	PCBP4
NPL	GABRG2	RHBDD3	SMIM4	YWHAQ
NPY1R	GALNT11	RHOA	HES4	MTDH
NQO1	GALNT12	RIMKLB	NAGK	CDK19
NR2F6	GALNT17	RIMS2	LEAP2	RETREG1
NRG1	GAREM1	RMDN1	MAP3K7CL	PCMTD1
NRSN1	GARNL3	RNF38	PPP1R3B	CYP3A12
NT5C3A	GAS7	RNLS	AKIP1	QKI
NT5DC1	GAS8	RNPS1	GALK1	SEC11C
NUBPL	GCFC2	RPH3A	CKAP2L	MFF
NUDT4B	GDAP1L1	RPL22L1	NDUFS5	FOXRED1
NUP133	GDPD1	RPL34	ZNF772	SUCLG2
NUP188	GDPD5	RPL38	FAM207A	ACADVL
NUP62	GIGYF1	RPP30	SDR39U1	PCM1
OC90	GIMAP8	RPS8	ATP5IF1	ADH4
OCC1	GINS1	RTCA	RNASEH2C	MRPL1
ODAD4	GIPC2	RTN3	MYL6B	ADAM17
ODF2L	GLG1	RTN4IP1	COPS4	MTTP
OGDH	GLRA2	RTTN	MGST3	RBM47
OGFOD1	GLUL	RWDD1	ZFP57	KIN
ORAI2	GLYR1	RWDD3	ATP6V1F	NME6
ORC2	GM525	RYR1	ZNF333	ZCRB1
OSGIN2	GMCL1	SAE1	IL33	IL11RA
OSMR	GMDS	SAMD4B	FGF1	A2M
OSTM1	GMPPA	SBF1	GTF2H5	LTBR
OTULINL	GMPPB	SCAP	QRSL1	FTH1
P2RX5	GMPR	SCARB1	FXYD1	SLC41A2
P3H4	GNAI2	SCD5	RPL18	APBA3
PABPC1	GNB1L	SCG5	RPS13	GRAMD4
PABPC1L2A	GOLGA5	SCMH1	COMMD3	TBC1D22A
PAK1	GPAT4	SDF4	CLMP	EDC3
PAK6	GPD2	SDHC	USP20	DPP3
PALM3	GPR37L1	SEC31B	RPS19	SLC25A45
PAQR8	GPR89	SEPTIN5	OSBPL7	NUDT22
PARD3B	GPX8	SERINC1	C1D	FADS2
PCGF5	GRAMD4	SERINC5	APOC4	CELF1
PCYT2	GRIA1	SEZ6	NDUFB10	ZNF215
PDCD5	GRIA2	SFXN5	BCAS2	ALDH4A1
PDE7A	GRIA3	SGSM1	MT-CO3	STARD10
PDLIM4	GRIK1	SGTA	SRRD	SLC9B1
PDLIM5	GRIK4	SH3BGRL	COX5A	TMEM135
PDLIM7	GRIK5	SH3BP5	PAAF1	SLC36A4
PDZD4	GRIN2A	SH3BP5L	RPL11	COL13A1
PDZK1IP1	GRIN3B	SHANK3	MIEF2	NT5E
PEBP1	GRIPAP1	SHISA5	COPG2	WRNIP1
PER1	GRK4	SHISA6	MFSD9	FBXO9
PET100	GRK5	SIK3	PTRHD1	HNRNPM
PFKP	GRM1	SIRT2	RARS2	CTBS
PGAM2	GRM4	SKIV2L	IER3IP1	SMU1
PHYHIP	GRM5	SLC17A7	NGEF	ANGPTL3
PIGG	GRM8	SLC19A1	SFXN2	FGGY
PIGR	GSG1L	SLC1A2	FDX1	C8B
PIM3	GSTM1	SLC22A17	RPL36A	SCP2
PIP4P2	GTF2A2	SLC22A5	PSMB4	ECHDC2
PKNOX1	GTF2H3	SLC24A3	VBP1	OSBPL9
PLA2G5	GTF2I	SLC25A10	ETFB	TESK2
PLAG1	GTF3C4	SLC27A5	FAU	AMY2A
PLCB3	GTPBP3	SLC2A11	MECR	HNF4A
PLCXD1	GYAR	SLC35B3	DCTN3	MFSD2A
PLEKHG4	GYG2	SLC35F5	TIMP2	THAP3
PLTP	HASPIN	SLC38A7	TMEM145	CNOT6L
PLXDC2	HDAC11	SLC39A10	TARDBP	LBP
PM20D2	HDAC3	SLC39A3	ABCA7	ADH6
PMF1	HDAC4	SLC44A1	MOB2	MASP2
PNKD	HDAC5	SLC4A10	SEPSECS	SLC1A2
PNLIPRP2	HDLBP	SLC4A7	BLOC1S2	MLF2
PNN	HERC1	SLC5A6	RNASET2	HRG
PNO1	HES4	SLC6A9	ALAD	PBX3
PNPLA6	HFE	SLCO3A1	SUGP2	SLC25A32
POGZ	HGH1	SMARCA4	COQ5	SAE1
POLB	HIF3A	SMC6	TRIAP1	C5
POLR1D	HIGD1A	SNAP91	HARS2	DPAGT1
POMC	HIKESHI	SNCA	HIBCH	NDUFB6
POMGNT1	HLF	SNRNP70	ATP5PF	ADPGK
PPAN	HM13	SNRPN	CCDC39	MFSD14B
PPIA	HMBS	SNX14	RPS5	KATNA1
PPM1K	HNRNPAB	SORBS3	CREG1	SPART
PPP1CC	HNRNPC	SORD	MCTS1	FRG1
PPP1R35	HNRNPD	SPACA6	CLYBL	SLC7A2
PPP1R3C	HNRNPDL	SPAG9	ZNF32	HOOK3
PPP1R3G	HNRNPH3	SPARC	HNRNPH1	DNAJC3
PPP2R2D	HNRNPM	SPIN1	TMEM208	CLPX
PPP2R5A	HOOK2	SPNS2	TST	DNAJC15
PPP4R1	HP1BP3	SRPK2	ANXA4	OTC
PRDM6	HPS3	SRSF11	SELENOM	TDO2
ABCA2	HS3ST4	SRSF5	RPS15	HPGD
ABCB4	HSDL1	SS18L1	SDHD	GCDH
ABCB7	HSF4	STIM1	GJB2	DHPS
ABCC1	HSPA4L	STK11	ADSL	UOX
ABCC10	HSPBP1	STK32A	CIB1	MVB12A
ABCC2	HTR4	STOX1	TJP3	FGB
ABCC3	HYAL1	STX16	NDUFS6	C3
ABCD3	HYLS1	STX3	CETN1	ATXN10
ABCE1	HYOU1	STXBP1	NDUFB2	GLUD1
ABCF1	ICAM5	SUGP2	GMFG	CDC123
ABHD17A	ICE2	SUMO2	C2ORF49	GSTM1
ABL1	IDH3B	SUN1	HMGB2	DNAJC12
ABLIM2	IFI27L1	SUOX	SLC25A3	LIPA
ACE	IFT20	SYS1	SGF29	PIK3AP1
ACER1	IFTAP	SYT7	AGMAT	ADAM9
ACER2	IKZF5	TAF9	MBD3	PAPOLA
ACIN1	IL11RA	TALDO1	PSMG4	IFI27
ACO1	IL16	TASOR2	COX7A2L	RNF181
ACO2	ILDR2	TBRG1	SPDYC	PCNP
ACSL4	ILF3	TCEAL3	SNRPF	SMOC1
ACTB	ILK	TCF7L2	THRSP	GCH1
ACTG1	IMMP2L	TCN2	AMZ2	RALGPS2
ACTG2	IMMT	TENM2	TMBIM4	TLN2
ACVR1	IMPDH2	TFG	RPS3	GTF2A2
ACYP2	INCENP	TFR2	RSRC1	SQOR
ADAMTS13	INF2	TIMP4	BABAM1	MIA2
ADAMTS2	INPP4B	TLE5	MRPS23	DHX38
ADAMTS3	INPP5J	TM2D3	FMO5	CRCP
ADARB2	IPO4	TMEM108	RDH16	AUTS2
ADAT1	IQCB1	TMEM121	IGBP1	CUX1
ADAT3	IQGAP1	TMEM14C	COA6	COPS6
ADCY1	IQUB	TMEM158	ATP2B2	MACIR
ADCY10	ISM2	TMEM17	MGST1	PPIP5K2
ADCY5	ITGB2	TMEM175	CMTM8	SCAMP1
ADD1	ITGB8	TMEM18	SNRPG	FZD3
ADH5	ITIH3	TMEM183A	STX16	GHR
ADIRF	ITPKC	TMEM208	PDE1C	STT3B
ADRA1D	ITPR1	TMEM259	YAE1	GOLPH3
ADRB3	ITSN1	TMEM59L	CSK	HLA-DRA
AFF3	IZUMO4	TMEM62	ANAPC15	UBE2B
AGAP2	JADE2	TMEM63B	PNISR	PIH1D1
AGBL5	JAKMIP2	TMEM67	FN3K	MANEA
AGO2	JAKMIP3	TMEM8B	ANKRD23	SLC35A1
AGPAT1	JAM2	TMEM94	TRAPPC13	SLC29A1
AGPAT3	JMJD1C	TMOD1	MRPL39	ZFAND3
AGT	JMJD4	TNRC6B	RPL30	RTN4
AGTRAP	JOSD1	TP53I11	DDO	PPARA
AHCYL1	KANK2	TP53INP2	NDUFAF8	CLU
AHSP	KARS1	TPM2	TJAP1	AASS
AIFM1	KAT6A	TPM3	CPQ	GPLD1
AK9	KATNAL1	TPP1	RPL18A	VTN
AKAP6	KCNA3	TRA2A	TRMT61A	HPN
AKIRIN2	KCNB1	TRAM1	JPT1	RAD23A
ALAD	KCND3	TRAPPC11	TRMT112	FETUB
ALDH1A3	KCNIP4	TRAPPC4	COQ6	PIGR
ALDH2	KCNJ6	TRIM46	SURF1	ACSL4
ALDH3A1	KCNK10	TRIM68	NDUFS7	RDH11
ALG13	KCNMA1	TSC2	MRPL2	LDHD
ALPL	KCNN2	TSPAN7	DQX1	AUP1
ALX3	KCTD20	TSR2	AKR1A1	GSTA2
AMDHD1	KDM1A	TSTD3	SPCS2	MARCHF7
AMIGO1	KDM4A	TTC14	TMEM67	GAL3ST1
AMN1	KDM8	TTC7B	TAF11	SLC37A4
AMOTL2	KDRL	TUBA8	MACROD1	PATR-A
ANAPC4	KDSR	TUBB4A	GLRX5	OSER1
ANGPT1	KHDRBS3	TUSC3	SLC35A5	PSMD1
ANGPTL4	KIAA0100	TXNL4A	INPP5B	AHSG
ANGPTL6	KIDINS220	TYW3	C4BPB	TRPV2
ANKDD1B	KIF21A	TYW5	RAB14	ERP44
ANKK1	KIF22	UBAP2L	PPM1K	MOGAT2-B
ANKRD26	KIF5A	UBB	PRDX6	TCEA1
ANKRD34A	KIFC3	UBC	RPS14	RBP4
ANKS4B	KIN	UBE2Z	SAFB2	SEPHS1
ANPEP	KLC4	UBN1	COPS5	EMG1
ANXA1	KLHDC10	UGP2	ADPRM	SLC22A6
AP1M1	KLHDC3	UHRF2	SPP2	SIRT3
AP2A2	KLHDC4	ULK3	HACD3	CADM1
AP3M2	KLHL11	UNC5A	TMEM70	ALKBH6
AP4B1	KLHL18	USP11	FDFT1	ZZZ3
AP5M1	KLHL28	USP16	UXT	CYRIB
APBA2	KLHL32	USP54	ZRANB2	UBAC2
APEX1	KLK8	VAC14	NKAP	TMEM219
APEX2	KMT2C	VANGL2	MTCH2	OAZ1
APLP2	KMT2E	VDAC1	FAM32A	HABP2
APOA2	KMT5B	VEZT	COA5	SSR3
APOE	KMT5C	VPS13A	MRPL34	RNASE4
AQP9	KRAS	VPS26C	PRICKLE4	PAM
ARCN1	KYAT1	VPS50	UCHL3	ABI1
ARGLU1	L1CAM	VRK3	D2HGDH	DDX46
ARHGAP35	LAMP5	VWA7	PSMD8	GDE1
ARHGAP44	LANCL2	WAC	CDK10	SFSWAP
ARHGEF17	LASP1	WARS1	SNX7	ACY3
ARID2	LCMT1	WDR17	BRAT1	PYGO2
ARL14EP	LCN6	WDR19	LIPT1	C9ORF64
ARL6	LCOR	WIZ	RPL26	CD1D
ARMCX1	LDAH	WNK2	ATP6V1H	MINDY1
ARMCX3	LDB1	WTAP	AP4S1	TMCO6
ARMT1	LDB2	XPO6	MED7	SALL1
ARPC2	LDHD	YKT6	NSMCE4A	PPP4R2
ARSB	LGALS1	YME1L1	NDUFAF2	TSEN34
ARSL	LGALS8	ZBED6	C2CD5	SLC45A3
ART2	LIFR	ZBTB18	SUMO1	C7ORF26
ASB5	LIN54	ZC3H7B	ZNF383	SWI5
ASB6	LIN7A	ZDHHC16	DERA	AKAP17A
ASL	LMO7	ZDHHC20	NACA	TTPAL
ATF4	LOXL1	ZER1	CHCHD10	PLAUR
ATG2A	LRFN5	ZFP90	GMNN	TSEN54
ATG4C	LRP12	ZFYVE16	JKAMP	UBB
ATG9A	LRRC43	ZMIZ1	TSPO	ASPA
ATL1	LRRC45	ZMIZ2	KDRL	ATP11A
ATL2	LRRC7	ZNF142	TMED1	MASP1
ATL3	LRRC74B	ZNF23	NGLY1	MMTAG2
ATOX1	LRRC8B	ZNF276	TMEM50A	MBNL3
ATP13A3	LRRFIP1	ZNF335	HTRA2	MTHFS
ATP1A3	LRRFIP2	ZNF410	BCS1L	ADPRS
ATP23	LSM1	ZNF566	H2AZ1	S100PBP
ATP5F1A	LSM14B	ZNF575	PEX3	DDX5
ATP5F1E	LSR	ZNF593	RPS2	INTS10
ATP5IF1	LZIC	ZNF655	MTG2	TPT1
ATP5MC1	LZTR1	ZNF706	CCDC9	ADAMTS13
ATP5MC3	LZTS1	ZNRD2	QPRT	CGREF1
ATP5MD	MACROD1	ZPBP	OCEL1	DCAF11
ATP5PO	MAD2L2	ZRSR2	MRPL9	NSUN5
ATP6AP1	MAG	ZSCAN4	MRPL20	CIITA
ATP6V0A1	MAN2C1	ZSWIM3	SEM1	RTEL1
ATP6V0D2	MAP2	ZZZ3	EIF3K	RNF123
AXDND1	MAP2K4		COX5B	MAPK3
AXIN1	MAP2K5		SPCS3	PLA2G3
AXIN2	MAP3K12		RASSF4	PPOX
AZIN1	MAP4		SERF1	TIGD5
B3GALNT1	MAP4K3		DNASE2B	CNPY3
B3GAT3	MAP4K4		C10ORF143	PTPRU
B3GNT3	MAPK10		CHURC1	STAB1
B4GALT2	MAPK15		MED4	DNTTIP1
B4GALT3	MAPK3		SMARCA1	PHF1
B9D1	MAPK8IP2		PTER	PHKG2
BAG3	MAPK8IP3		SERF2	HDGF
BAMBI	MAPKAP1		UPRT	MIA3
BAP1	MAPT		SRGN	ADAM15
BATF2	MARCHF1		NATD1	GPT
BBS1	MARK3		GALE	C8ORF33
BBS2	MAST3		EFNA2	FXR1
BBS7	MAST4		SLC35B3	HOOK2
BCAM	MBD1		UTP18	NOP56
BCKDK	MBD3		RPS3A	PUSL1
BCL3	MBD4		AMN	BNIP3
BCR	MBP		MRRF	PKN1
BDH2	MC1R		HYKK	PNP
BDKRB2	MCF2L		NDUFA6	KHNYN
BET1L	MCTP1		NDUFB9	ITGB1BP1
BEX2	MDGA2		VDAC2	SLC26A2
BEX3	MDM2		TAB1	STEAP3
BEX4	MEAF6		RPS9	APOOL
BGN	MED1		RPS7	SPOPL
BHLHE23	MED10		MRPS11	SLMAP
BICRA	MED12		WASHC3	CEP63
BIRC2	MED13		AOPEP	ARPC1A
BIRC5	MED14		CCNC	AGAP3
BLCAP	MED23		FAM162A	IP6K2
BLM	MED6		CCDC28A	DHX9
BLOC1S2	MEGF10		PEBP1	FAM20B
BLOC1S3	MEIS3		TAF15	MRPS24
BMI1	METTL14		RIOK2	MPP6
BNIP2	METTL25		C6ORF47	TMEM50B
BOK	MFF		PSMB5	PRELID3A
BOLA3	MFSD12		RPS27L	LUC7L
BORCS7	MFSD6		ZNF787	ARNT
BPIFC	MGAT4A		ZNF354A	DCTN1
BRAWNIN	MGAT5		RAB12	LUC7L2
BRCC3	MGLL		FAM204A	CLN8
BRINP3	MIB2		CST7	MISP
BRMS1L	MICAL2		CHCHD2	ATE1
BROX	MICAL3		UGP2	ALG13
BRSK1	MICU1		BROX	ZC3H18
BRSK2	MICU3		FANCE	SMPD4
BRWD1	MIEN1		ERP29	JHY
BSG	MIER2		AKR7A2	MAVS
BSN	MINDY3		RPL17	ZBBX
BTBD2	MINK1		NDUFA4	GPCPD1
BTF3	MKNK1		ETFA	PTPN3
BTG3	MKRN1		UBA52	PRPSAP2
BTK	MLF1		ATP5F1A	NAA60
BTN1A1	MLIP		SYCE2	RAB5C
BUB1B	MLLT10		GMFB	IFT20
BZW1	MLLT6		ATP5MC2	FKBP7
C12ORF40	MMD2		ATG5	ZMYM5
C12ORF45	MMP16		PSMB6	TMEM106C
C14ORF28	MMP24		HDAC3	FAM210A
C17ORF75	MOBP		RAB5IF	USP19
C1ORF94	MOCS2		UQCRFS1	GPBP1
C1QA	MON2		EIF3M	RBM12
C1QL2	MORC2		RPL13	NBR1
C1QTNF7	MORC4		C17ORF75	EIF4A1
C2CD4A	MPEG1		GNB2L1	G3BP1
C2CD6	MPP2		ALDH2	TTC19
C2ORF72	MPPED2		VPS26C	MLLT10
C3	MPRIP		RPSA	CEP57L1
C9ORF64	MPZL1		MRPL3	LGALS9
CA2	MRAS		HSPD1	NMT2
CABCOCO1	MRPL35		DIPK2A	BAP18
CABP1	MRPL54		LYAR	MAP3K3
CACHD1	MRPS18A		CIR1	LENG8
CACNA1F	MRPS34		RPL5	CACNB4
CACNG2	MRPS5		PSMA7	NDST1
CACNG6	MSANTD2		RPL21	RALY
CACNG7	MSH3		ZBTB8A	TRMO
CACTIN	MSH6		NME2	CCM2
CADM3	MSL1		ACSF2	G3BP2
CAMK2N1	MSRA		MAN2B1	DPY19L4
CAMKMT	MT2		KIAA1109	FBXO31
CAMSAP1	MTCL1		NUMA1	MGAT1
CAMSAP3	MTDH		ZSWIM8	PLEKHA5
CANT1	MTG1		CLASP1	RIPOR1
CAPN13	MTG2		EPS8L2	STOX1
CAPS2	MTMR1		WDFY3	HMGXB4
CAPZB	MTMR2		F12	ATP11C
CARM1	MTMR3		PEAK1	RNH1
CARNMT1	MTMR4		SMG9	PICALM
CARTPT	MTRF1L		PPFIA1	ZXDC
CASP9	MTRR		EFTUD2	BTF3L4
CASTOR1	MVB12B		VCL	TRMT1L
CAT	MYCBP2		MSI2	GOLGA2
CBX3	MYH10		FAM168B	PITPNM2
CBX4	MYO1B		PRKAR1A	GAPVD1
CC2D1A	MYO9B		SKI	CARD19
CCAR2	MYT1		TYK2	CYP1A1
CCDC115	MYT1L		GDPD5	NMRK1
CCDC12	MZT2B		BDP1	NFIB
CCDC150	NADK		GSK3B	SMAP1
CCDC180	NALCN		PHF12	NSD3
CCDC181	NANS		SLC45A4	ZSCAN29
CCDC33	NARS		LBR	RBM26
CCDC39	NAT9		ARHGAP29	PINX1
CCDC42	NAV3		DAG1	RANBP3
CCDC78	NAXD		PHACTR2	ANKRD24
CCDC89	NBN		AKIRIN2	PIP5K1C
CCDC9	NCALD		ATP7A	TMEM41B
CCDC91	NCAN		STX12	MPP2
CCDC92	NCAPH2		THOC3	SERPINA6
CCL25	NCOA3		CHD8	DDX24
CCNC	NCSTN		RAB7A	TXNL4A
CCND3	NDRG4		DENND5A	CAMTA1
CCNG1	NDST3		FOXN3	PEX19
CCNK	NDST4		TBC1D20	RAI14
CCR10	NDUFA11		SYMPK	WTAP
CCR9	NDUFAF6		TECR	SYNE1
CCT2	NDUFS6		IFRD1	KLHDC3
CCT6A	NEDD4		PATL1	KCMF1
CCZ1	NEDD4L		RGL2	MRPS18B
CD177	NEIL2		NFIA	COLEC11
CD300LG	NEK1		ACTN4	USF3
CD36	NEK8		EEF2	NONO
CD52	NELFB		KDM3B	ARHGAP45
CD59	NELFCD		AGO2	KAT2B
CDA	NELL1		CYP8B1	EPHA10
CDC14B	NFASC		CTSA	LSM14A
CDC20	NFATC4		SOCS7	ARRB2
CDC34	NFIC		TRAF4	VPS39
CDC42BPB	NFXL1		KCTD10	NINL
CDC42EP4	NIN		CPD	NAA20
CDCA7	NIPSNAP2		BCL7B	UGT1A6
CDH19	NIT1		YWHAZ	ALYREF
CDH2	NIT2		CC2D1A	MTMR14
CDH24	NKAIN2		ZNF236	THRAP3
CDH5	NKPD1		OTUD7B	NSD1
CDHR1	NKTR		SMARCA5	FN1
CDK16	NLRX1		CNOT1	RAB23
CDK4	NNT		USP22	PYDC3
CDK5R2	NOC2L		STAM	AGTRAP
CDK5RAP1	NOL4		SLC5A2	CDC37L1
CDK7	NOP56		BOD1L1	IRF2
CDKL3	NPRL2		PAFAH1B2	SNX6
CDKN1A	NR1D2		BRD4	ENTPD4
CDKN2B	NR3C1		VMP1	BRD8
CDKN2D	NR4A2		HIF1A	OGA
CDO1	NRBP2		ZFP91	NIPSNAP2
CDR2L	NRCAM		CLEC16A
CDV3	NREP		ATAD3
CEBPZOS	NRXN2		CD163
CELF3	NSMCE2		WAPL
CELSR2	NT5C2		USP24
CENPU	NT5M		SECISBP2L
CEP192	NTAQ1		MAPKAPK2
CEP20	NTHL1		SRCAP
CEP350	NTNG1		ARIH2
CEP43	NTRK2		ANKRD52
CERKL	NTRK3		WASF2
CERT1	NUDT22		KMT5B
CES1	NUDT3		TNIP1
CETN3	NUMB		GATAD2B
CFAP300	NUP210		KIF1B
CFAP44	NXPE3		FAM126B
CFAP46	NYAP1		PHF2
CFAP54	OARD1		SPTBN1
CFAP61	OBSL1		RELL1
CFAP99	OCIAD1		ZMIZ1
CFHR5	ODR4		PPP2R5D
CFL1	OGA		MOB3A
CHD8	OGDHL		HMGCS2
CHERP	OPA1		ARID1A
CHIC1	OPHN1		RASGEF1B
CHIT1	OPLAH		GFOD1
CHMP2A	OPRL1		TMOD3
CHORDC1	OSBPL11		LAMC3
CHPF	OSBPL1A		ZNF358
CHRNA4	OSBPL5		SH3D19
CHRNE	OSBPL6		CYLD
CHST11	OSBPL9		MED13
CHST2	OSER1		ADAR
CHST7	OXR1		SELENOP
CHUK	P4HA3		TFR2
CIDEC	PACC1		GRK2
CIRBP	PACSIN1		SPEN
CISD1	PACSIN3		JAK1
CISD2	PAIP1		CRKL
CITED2	PAK3		MIDEAS
CKMT1A	PAK5		HMBOX1
CLC	PAM		YEATS2
CLCA4	PAMR1		PPME1
CLDN7	PAN2		ACVR1B
CLEC16A	PANK2		KMT2C
CLIC4	PAPOLA		IQGAP1
CLMN	PAPSS1		USP31
CLPTM1	PARD3		MCMBP
CLRN2	PARK7		UBAP2L
CLSTN3	PARP6		CHPF
CLUH	PATJ		FBXO34
CMC1	PAXX		CHST7
CNK3/IPCEF1	PBX1		NUP62
CNOT6	PBX3		IGSF11
COL11A2	PCBP2		TUBA1C
COL16A1	PCBP4		SPECC1L
COL21A1	PCED1A		NAPA
COL22A1	PCGF3		FBXO11
COL4A3	PCLO		ZNF574
COL5A1	PCM1		TUBB5
COL5A3	PCMTD1		ZBTB38
COL6A4	PCNP		CARM1
COL6A5	PCNX1		ZYX
COL8A1	PCNX2		DUSP16
COMMD8	PDE4DIP		PTPRF
COPA	PDIA6		TXNDC11
COPB2	PDILT		SH2B3
COPS3	PDP1		ZNF217
COPS4	PDXK		WDFY4
COPS9	PDZD11		MYO1C
COQ9	PDZRN3		SP1
CORO1B	PEAK1		NCKIPSD
COTL1	PEG3		RBM27
COX15	PEX14		PAXIP1
COX17	PEX5L		MEF2A
COX6B1	PEX6		PANK2
COX6B2	PFKL		AXIN1
COX6C	PFKM		TPR
COX7A1	PGGT1B		TSC22D2
COX7A2L	PGM3		CDH5
COX7A2P2	PGS1		PLXNB2
COX7B	PHC1		PKD1
CPEB4	PHC2		DIP2B
CPLANE1	PHC3		ZNFX1
CPLX1	PHF1		UBN1
CPLX2	PHF14		ZFR
CPNE3	PHF20		CMLKR1
CPNE5	PHF20L1		C1GALT1
CPSF3	PHF21A		WAC
CRAT	PHF3		B4GALT3
CRB3	PHKB		DSE
CREBBP	PHKG2		USP53
CRK	PHLDB1		CEP170
CRMP1	PHRF1		PHLPP1
CROT	PI4KB		PPP1R15A
CRTAC1	PIAS2		TNRC6C
CSF1R	PIAS4		YIPF2
CSNK1E	PICALM		REV3L
CSNK2B	PIGK		RREB1
CSPRS	PIGL		XPR1
CST3	PIGX		TBC1D9
CSTF2	PIH1D1		THAP5
CTNNA3	PIP4K2A		SENP2
CTNNBIP1	PIP4P1		DVL3
CTSA	PIP5K1A		PPM1G
CTSD	PISD		EIF5A
CTSW	PKIG		MBNL2
CTTNBP2NL	PLAAT3		MSN
CTXN1	PLCB1		CHD4
CUL4B	PLCB4		PRELID2
CYB561	PLD2		MAP4K4
CYB5R3	PLEKHA5		TRIOBP
CYFIP1	PLEKHA6		RBPJ
CYP1A1	PLEKHH1		MXI1
CYP1A2	PLK5		KIF13B
CYP1A5	PLOD1		ITPR2
CYP51A1	PLOD3		ERC1
CYREN	PLP1		TPP1
CYSTM1	PLPPR1		CHSY1
D2HGDH	PLPPR3		EXTL2
DAB2IP	PLPPR4		SLC23A2
DACT3	PLPPR5		PABPC1
DCAF17	PLS1		ITPRIP
DCN	PLXNB1		PPM1D
DCP1B	PNPO		R3HDM1
DDB1	POC5		FOXO3
DDX3Y	PODN		CHERP
DDX5	POLR1F		RAB30
DDX60	POLR2I		REL
DERL1	POLRMT		WSCD2
DERL2	PORCN		RORA
DESI1	PPFIA4		INO80
DGKK	PPFIBP1		ANGPTL4
DGUOK	PPFIBP2		SERPING1
DHX30	PPHLN1		TOB2
DHX33	PPIL6		LRP10
DIPK1A	PPIP5K1		SREBF2
DIPK1B	PPOX		POGZ
DLAT	PPP1R12A		PTPN23
DLEC1	PPP1R12C		ZEB2
DLGAP3	PPP1R13L		ARID2
DLL4	PPP1R3D		AOX2
DMAC1	PPP1R3F		TP53INP2
DMAC2L	PPP1R7		SLC6A8
DMXL2	PPP1R8		AKAP13
DNAAF2	PPP1R9A		FOXO1
DNAH7	PPP2CB		ATP2C1
DNAH8	PPP2R1B		PUM1
DNAJB13	PPP2R3A		CEP170B
DNAJC10	PPP2R5C		INTS1
DNAJC5	PPP4R3B		PTPRJ
DNAJC9	PPP6C		SNX29
DNMT1	PPP6R3		NF1
DOCK7	PRDM2		KIF16B
DPP4	PRELID3B		TGFBR2
DPP7	PRKACB		SMAD1
DPY19L3	PRKAR1B		MBP
DPYSL2	PRKCB		CLMN
DR1	PRKCSH		SLC31A2
DRG2	PRMT7		NFE2L2
DSCAM	PRMT8		TMEM259
DTNBP1	PROCA1		PRKCD
DTWD1	PRPF38B		EMSY
DUOX1	PRPF39		RC3H2
DUOX2	PRPF40B		APC
DUOXA1	PRPSAP1		INPP5D
DUSP26	PRR29		IFNAR1
DUSP6	PRR5L		SIN3A
DUSP7	PRRC2A		FAM135A
DYNC2H1	PRRT3		CMIP
DYNC2I1	PRSS16		CLUH
DYNLL2	PRXL2A		RPS6KA3
DYNLRB1	PRXL2C		MYH9
DYNLT2	PSAP		NIN
E2F2	PSD		LNX2
EBAG9	PSIP1		ATG2A
EBF3	PSME3IP1		SSH2
EBF4	PTBP2		TMEM184B
EBPL	PTCD2		SMAP2
ECE2	PTCH1		SLC16A10
EDRF1	PTCH2		GAS7
EEF1AS	PTDSS2		IRS2
EEF2K	PTGES2		SH3GL1
EFCAB6	PTGIS		SLC38A1
EFHC1	PTK2		ZNF689
EFTUD2	PTPN13		DYNLL2
EGF	PTPN9		SLC39A1
EGR1	PTPRA		HMGXB3
EGR4	PTPRD		TNRC18
EHD1	PTPRK		PRDM4
EID2	PTPRT		RBPMS2
EIF1	PUF60		MICAL2
EIF1AY	PUM2		HMGA1
EIF2A	PUS3		MT-ND1
EIF2AK1	PUS7		CIC
EIF3D	PUS7L		SAP130
EIF3J	PXK		HMOX1
EIF4E1B	PXN		FOLR2
EIF4ENIF1	PXYLP1		POMGNT2
EIF5A2	PYDC3		FOXK2
EIF6	QKI		SERPINB10
ELANE	QTRT1		NKIRAS2
ELOVL5	R3HDM4		MYH14
ELP2	RAB15		TMCC3
EMC3	RAB21		SUCO
EMC4	RAB26		PTPN1
EMC8	RAB2A		UBALD1
EME1	RAB31		MAP3K5
EMID1	RAB36		ZBTB10
EML1	RAB3D		DHX33
EML2	RAB5C		THRB
EML6	RABEP1		TJP1
ENG	RABGAP1		PEDS1
ENO4	RABGEF1		ZDHHC5
ENPEP	RABL2A		ZZEF1
ENV	RALGAPA1		TULP4
EPAS1	RALGAPB		SULF2
EPB42	RALY		JAK2
EPG5	RALYL		NUP153
EPHB2	RAP1GAP		ZNF592
EPHX3	RAP1GAP2		WWC3
EPN2	RAP1GDS1		CDYL
EPS8L2	RAPGEF5		DNAH2
EREG	RAPGEFL1		TMEM97
ERFL	RASGEF1A		KBTBD2
ERG	RASGRF2		ANKRD28
ERG28	RASIP1		BCR
ERGIC1	RBAK		SOX6
ERICH3	RBBP6		UBAP2
ERLIN2	RBBP7		AFF4
ERRFI1	RBBP8		TJP2
ERVK-25	RBCK1		NOTCH2
ERVPABLB-1	RBFOX1		PLBD2
ESPL1	RBFOX2		TMEM63B
ESRP2	RBM10		RASAL2
ETV4	RBM11		TBL1X
EVC	RBM15		MITF
EVI5L	RBM18		TTGN1
EXD1	RBM24		ERRFI1
EXO1	RBM39		TNFAIP2
EXTL1	RBMS3		PREX1
EYA2	RBPJ		SYNDIG1L
EYA3	RBSN		ARID1B
EZHIP	RCAN3		INPP5F
EZR	RCE1		FLOT2
F5	RCN3		RANBP2
F8A1	RCOR3		KLHL15
FABP1	RELL2		HELZ2
FABP2	REPS1		CAMSAP2
FABP6	REPS2		ELMO1
FAF1	RERE		PROX1
FAIM2	RFC3		DENND4A
FAM102A	RFK		SESN3
FAM107B	RGL1		MVP
FAM110B	RGL2		UBTD1
FAM111B	RGS3		RNF44
FAM120A	RGS7		CYBB
FAM131C	RHBDD1		SCAF4
FAM13B	RHBDF1		JCAD
FAM149A	RHEB		TCF20
FAM151B	RHOBTB2		AP2A1
FAM162B	RHOT2		NFIX
FAM171A2	RIC1		SETD7
FAM207A	RIC8B		PML
FAM214B	RICTOR		NFKBIA
FAM216B	RIDA		CSF1R
FAM221B	RIMS1		NUP98
FAM222A	RIMS3		HIPK3
FAM222B	RIPK1		ATF7IP
FAM229B	RIPOR1		LPIN3
FAM241B	RMDN3		TGFBR3
FAM32A	RNASEH2B		DTX2
FARSA	RNF112		UBD
FARSB	RNF123		MIDN
FAS	RNF126		AMPD2
FBXL17	RNF13		WDR1
FBXL18	RNF130		EP300
FBXL5	RNF146		GIT1
FBXL7	RNF181		RC3H1
FBXO10	RNF216		CYP2E1
FBXO11	RNF41		TNFRSF1A
FBXO34	RNFT1		TPM4
FBXW5	ROCK1		HIPK1
FCGR2A	RPE65		NFAM1
FCGR3	RPL19		GAB2
FCMR	RPS10		ELF1
FCRL6	RPS18		EPB41
FDX2	RPS2		CXCL16
FERMT1	RPS25		ARHGAP35
FGF18	RPS4		COLGALT2
FGF20	RPS6KA4		HUWE1
FGFR1OP2	RPS6KB2		USP32
FGFR3	RPUSD4		SRF
FIGNL2	RSAD1		SIK3
FITM2	RSRP1		ZSWIM4
FKBP15	RTN1		PTPRE
FKBP8	RTN2		GATAD2A
FKRP	RTN4		RHOB
FLCN	RUFY2		MAP1B
FLII	RUNX2		STX2
FLT3	RUSF1		NOS3
FMC1	RUVBL1		KIF21A
FNDC4	SAFB2		WNK1
FOLR1	SALL1		MEX3D
FOXA1	SAMD12		CCDC6
FOXJ2	SAMD8		MYO9B
FOXK2	SARNP		SGMS2
FOXP4	SAT2		CSF2RA
FRMD4A	SAXO2		TAB2
FRMD4B	SBF2		SBNO2
FRY	SCAI		SLC38A2
FSTL1	SCAMP1		SPRY4
FUS	SCAPER		SIK2
FXYD1	SCLY		ELF4
FZR1	SCN1A		CEMIP2
G2E3	SCN2A		ZNF609
G3BP1	SCUBE1		DOT1L
G6PC3	SDCCAG8		ATP2B1
GAB2	SEC11A		FAM102B
GABARAPL1	SEC24C		EPAS1
GABARAPL2	SEC61A1		WNT2
GABRB2	SEH1L		APOD
GAD1	SEMA6D		ZRANB1
GAL3ST1	SENP2		ADGRE5
GALNT18	SENP7		STAT3
GAREM2	SEPTIN3		S1PR2
GART	SEPTIN9		CPEB4
GAS6	SETD6		SAMHD1
GASK1A	SF3B1		MAPK1IP1L
GATAD2A	SFI1		PLEKHG1
GATC	SFSWAP		DUSP8
GBF1	SGCE		MYO1D
GBP7	SGIP1		RNF19B
GCA	SGK1		BCL9L
GCNT1	SGMS1		RNASEK
GCSH	SH2B1		DUSP1
GDF10	SH2D3A		HDAC4
GGA2	SH2D5		HIPK2
GHDC	SH2D6		SLC16A1
GHSR	SH3GL2		ARL5B
GIN1	SH3GLB2		SDC3
GINM1	SH3KBP1		TGIF2
GINS2	SH3PXD2A		PXYLP1
GIT1	SHANK1		ATG14
GLRX	SHARPIN		LRP1
GLRX2	SHF		RAD54L2
GLS	SHISA7		EREG
GLS2	SHROOM1		CYP2A13
GLYATL3	SHTN1		STK40
GM2A	SIPA1		MYH10
GMEB2	SIRT5		TNFAIP1
GMFB	SLC10A3		BCL9
GMPR2	SLC10A5		SLC41A1
GNAZ	SLC12A2		CREBBP
GNPNAT1	SLC13A3		PPP1R10
GORASP1	SLC19A2		PLEKHM2
GORASP2	SLC24A2		BRPF3
GOT2	SLC24A4		GOT1
GPBP1	SLC25A36		ZFP36L1
GPCPD1	SLC25A39		CEP76
GPM6B	SLC25A40		TNFRSF1B
GPN1	SLC25A48		PPARD
GPN3	SLC35A1		NFATC3
GPR137	SLC35C2		SAMD4B
GPR37	SLC37A1		TOB1
GPRASP2	SLC39A9		ZFHX4
GPS2	SLC41A3		CTNNA3
GPSM1	SLC44A2		IL1R1
GRK2	SLC45A2		MT-ND2
GRN	SLC4A3		EGR2
GRSF1	SLC4A4		UBE2Z
GSAP	SLC66A1		FLVCR1
GSDMA	SLC6A6		SNTB1
GSG1	SLC6A7		RASSF1
GSTM3	SLC8A2		MAN1A1
GSTO1	SLC8A3		ZNF275
GTPBP1	SLCO1A2		CDKN1A
GTSF1	SLIT2		SVEP1
GUCD1	SLITRK2		S100B
GUF1	SLMAP		F13A1
GVQW3	SLTM		SMG7
GYPA	SMAD2		PPRC1
H1-0	SMAD5		DEPP1
HACD3	SMAP		LIMD1
HACE1	SMARCD3		SDC1
HADHB	SMG6		SLC30A7
HAO2	SMIM14		DAPK1
HARS2	SMOX		PDE4B
HAUS1	SNAP25		MAP1A
HAUS2	SNAPC1		LEPR
HAUS3	SNCAIP		EGLN3
HBB	SNTB2		CAPN2
HCN2	SNX15		CADM3
HDGFL3	SNX2		ARHGAP1
HEATR3	SNX25		NEDD9
HEATR5A	SNX3		CSF3R
HEBP1	SOCS2		SNAP25
HECTD3	SOCS7		TRIB1
HECTD4	SORBS1		IER5L
HELZ	SORBS2		TGFA
HEMK1	SORL1		TTC39B
HERPUD2	SP3		OLFML2B
HES6	SPAG16		CBL
HFM1	SPARCL1		ACTG1
HGS	SPAST		TNRC6B
HHIPL2	SPATA7		UNKL
HIBCH	SPATA9		SERPINA12
HID1	SPCS1		PRKAG3
HIF1A	SPHKAP		CCR2
HINT2	SPICE1		CAMKMT
HIVEP3	SPOCK3		MED22
HLTF	SPPL2B		ZCCHC14
HMBOX1	SPRED2		OASL
HMG20A	SPRING		FGR
HMG20B	SPRYD3		SUSD2
HMGB2	SPSB3		DUSP6
HMGCR	SPTBN4		JUN
HMGN2	SPTSSB		FAM107B
HMMR	SRC		ZFHX3
HNMT	SRCIN1		KLF6
HNRNPA0	SRGAP2		POM121C
HNRNPUL1	SRRM2		LTF
HNRNPUL2	SRSF10		MAST4
HOGA1	SRSF2		PAQR7
HOXB9	SS18		ABCA1
HPCAL1	SSBP2		STX11
HPRT1	SSBP4		RBM38
HPS5	SSH3		TDRD12
HRH3	SSR1		CALHM6
HS3ST1	ST18		ART2
HS3ST5	ST3GAL1		STX1B
HSCB	ST3GAL3		SHB
HSD17B11	ST3GAL4		UBE2QL1
HSF1	ST3GAL5		CREM
HSF2	ST6GALNAC6		XPO6
HTATIP2	ST8SIA3		NFKB2
HTR1D	ST8SIA5		FAIM2
HTRA3	STAG2		RND3
HTT	STAMBP		PSD3
HYPK	STAMBPL1		FOSL2
IDH2	STIMATE		KLF4
IFNGR2	STK19		PLXNA4
IFT81	STK25		ACER2
IFT88	STK32C		MTSS1
IGF2	STN1		KIF5C
IGFBP2	STPG1		ARL4D
IGLON5	STRN		ETS2
IGSF8	STX18		TMEM101
IGSF9B	STX8		PLAAT4
IL13RA1	STXBP5		PLCE1
IL17D	STXBP5L		ABL1
IL18	SULF1		ZFP36
IL21R	SUMF2		DUSP5
IL2RG	SUPT20H		SLC16A7
IL6ST	SUPT5H		SEMA6A
IL7R	SUPT6H		RELB
ILKAP	SUPT7L		HIVEP2
IMMP1L	SUSD4		SESN2
IMP3	SUV39H2		GLIS3
IMPACT	SV2B		SLC25A25
INAFM2	SVOP		EGFR
INO80C	SWI5		PLIN2
INPP5D	SYNE1		SOCS3
INSIG1	SYNJ1		AGBL3
INTS1	SYNJ2BP		LY75
INTS11	SYNM		DDIT4
INTS6L	SYT1		NTN1
IPMK	SYT16		NR4A1
IPO5	SYT5		SLC7A1
IPO9	SYVN1		RFLNB
IPP	TAC1		FST
IQGAP2	TAF1B		ANK3
IQSEC2	TAF1C		LOX
IRS4	TANC2		AMIGO2
IRX5	TAP2		ADAMTS9
ITGAD	TARBP1		C2CD4A
ITGB1BP1	TARS2		CDHR5
ITGBL1	TAX1BP1		THOC6
IVD	TBC1D1		MT-ND6
JKAMP	TBC1D14		GADD45G
JPH2	TBC1D4		VNN3
JPH3	TBCE		SDC4
JPT1	TBL1XR1		MCM10
KCNAB2	TCEA1		NPAS2
KCNC4	TCEAL9		STEAP4
KCNG1	TCERG1		MT-ND4
KCNH2	TCERG1L		IGHV1-18
KCNIP1	TCF20		TAR1
KCNJ4	TCTN1		EGR1
KCNK12	TDP2		CXCL2
KCNK2	TDRKH		ATF3
KCNK4	TENM1		BTG2
KCNQ2	TESK2		IGFBP1
KCNV1	TEX22		MUC5AC
KCTD17	TEX264		SPINK1
KDM5C	TFAP4		TG
KDM5D	TFDP1		HSD11B2
KEAP1	TFDP2		NR0B2
KIAA1549L	TGFBR1		IGLC1
KIAA1841	THAP3		DEFB1
KIAA2013	THRA		GLP1R
KIF14	TIAM1		EEF1AS
KIF18B	TIAM2		TPM
KIF20A	TIE1		CHST4
KIF27	TIGD5		CLEC3A
KIF5C	TIPIN		B4GALNT2
KIF7	TIRAP		ENV
KIT	TLE3		GM1673
KITLG	TLK2		BIRC5
KLF3	TM2D1		MT-ND3
KLF5	TMBIM1		MUC4
KLHL23	TMCO6		NOS2
KLHL6	TMEM120B		CCDC27
KPNA3	TMEM129		MSMB
KRT8	TMEM132D		ZNF226
KSR1	TMEM141		RTP4
KYAT3	TMEM145		ZNF521
L2HGDH	TMEM214		SLC34A1
L3MBTL4	TMEM229B		CACNA1S
LACTB	TMEM25		C2ORF92
LAMB2	TMEM255A		DYRK4
LAMP2	TMEM39B		ADM2
LAMTOR5	TMEM41A		SEMA3B
LANCL1	TMEM50B		ADRA2A
LAPTM4A	TMEM59		ANKRD37
LATS2	TMEM63C		RTL8A
LCMT2	TMEM68		ATL1
LCN15	TMEM80		HTR5A
LCORL	TNK2		CLUL1
LDHB	TNKS2		DSG3
LDOC1	TNNT1		GAPT
LEF1	TNPO1		WNT9A
LEPR	TOP2B		TMEM125
LGI3	TOR1B		IGHV3-23
LHPP	TOX4		MSH5
LHX2	TP53BP1		GCNT3
LIAS	TPCN2		DNAH11
LIMD2	TPP2		NCMAP
LIMK1	TPT1		IFITM5
LINC01551	TRAK1		HAUS1
LINGO3	TRB		COL9A2
LMAN2L	TREX2		ALDH3B2
LMBR1L	TRIM13		CA4
LMBRD1	TRIM3		DYNAP
LMCD1	TRIM39		NDST4
LMLN	TRIM9		HECW1
LONP1	TRIP12		SPATC1L
LONRF2	TRIT1		SP140L
LOX	TRMO		MYMX
LPAR1	TRMT9B		ZNF365
LPIN3	TRNT1		ZNF419
LRATD1	TRPC4		NEURL1
LRFN1	TRRAP		ZNF684
LRFN3	TRUB2		NRTN
LRP2BP	TSC22D1		TMPRSS2
LRP4	TSC22D4		TRMT61B
LRRC17	TSEN34		MOGAT1
LRRC24	TSNARE1		CTRB1
LRRC36	TSNAXIP1		FAM228B
LRRC41	TSPAN11		SYTL1
LRRC4B	TSPOAP1		FAM3B
LRRN2	TSSC4		EBPL
LRRN4	TTBK2		TM4SF20
LRRTM1	TTC13		DEGS2
LSM12	TTC16		SLC51B
LSM3	TTC23		SLC2A11
LSM6	TTC3		COPRS
LTBP1	TTC39B		CEP72
LTBR	TTLL1		ACT2
LURAP1	TTR		CRACR2A
LVRN	TTYH1		TRMT2B
LXN	TUB		TTC12
LYRM2	TUT1		LAD1
M6PR	TXLNA		WDSUB1
MAB21L3	UBA1		MT3
MAB21L4	UBA52		MGAT3
MACO1	UBAC2		SAG
MAD1L1	UBE2D3		TLR8
MAF	UBE2E2		ZNF343
MAF1	UBE2G1		AOX4
MAGED2	UBE2H		RHNO1
MAGED4	UBE2Q2		CCDC181
MAGOHB	UBE2T		BCO2
MAIP1	UBE2V2		PSRC1
MALL	UBE2W		TNNC1
MALSU1	UBL3		SUSD4
MAML2	UBR3		ZNF23
MAML3	UBTF		C15ORF40
MAMLD1	UBXN11		EFCAB7
MAN2A2	UCHL5		AHSP
MAN2B1	UFD1		CLDN15
MAP3K10	UGDH		ZFP62
MAP3K13	UHRF1BP1L		IL15
MAPK14	UMPS		SPEG
MAPK4	UNC13A		DLEC1
MAPK6	UNC13B		RAB19
MARCHF10	UNC45B		PDILT
MARCHF6	UNC5D		EFCAB5
MARCKS	UNC79		TBC1D19
MARCKSL1	UNC80		ZNF649
MARK1	URB2		NLRP6
MARK4	UROD		JPH2
MARS1	USP15		CFTR
MARS2	USP19		CFAP43
MASP2	USP20		SPA17
MAT1A	USP31		RHPN1
MATR3	USP34		VWA3A
MAX	USP5		TRIM66
MBD5	USP6NL		PDE6G
MBOAT7	UST		SPC24
MBTD1	UTP15		PLGRKT
MBTPS2	UVSSA		TNNT2
MCAT	VAMP4		TM4SF18
MCCC2	VCP		P3H4
MCEE	VEGFA		FFAR4
MCM8	VEGFB		HEATR4
ME3	VIPR1		NME9
MECP2	VSIG8		B3GNT3
MED15	VWC2L		NMES1
MED26	WASF1		IGSF9B
MED29	WASF3		G2E3
MED30	WASHC3		CACNG8
MEDAG	WASHC5		TLE2
MEF2A	WDFY3		DTD1
MEI4	WDR13		PNMA8A
MEMO1	WDR27		ADORA1
MEP1A	WDR47		ATG10
MEP1B	WDR59		CARMIL3
MEST	WDR7		GFRA4
METTL18	WDR93		HES6
METTL27	WDTC1		MAPK11
METTL6	WIPF3		RFLNA
METTL7A	WRAP53		KL
MFSD1	WRNIP1		MTMR11
MFSD14B	WSCD1		F8A1
MGARP	XIAP		HCST
MGAT4B	XPO4		STPG1
MGST2	XPOT		TEX22
MGST3	XRCC1		AATK
MICOS13	XRCC5		PDZK1IP1
MID1	YIPF1		TMEM198
MIDEAS	YTHDF3		ZNF569
MIF	YWHAZ		CD101
MKKS	ZBTB49		PRKCG
MLC1	ZC3H13		SERPINB7
MLH3	ZC3H7A		LSM8
MMADHC	ZDHHC1		MAMDC2
MMP15	ZDHHC3		SLC5A10
MMP17	ZDHHC9		PAQR5
MMP2	ZFAND2A		RAD1
MMUT	ZFAND2B		IQANK1
MNAT1	ZFAND4		TOMM5
MOCS3	ZKSCAN5		COL4A3
MORF4L1	ZMPSTE24		SCEL
MORN3	ZMYM3		CDX4
MORN5	ZMYM5		CCDC17
MPHOSPH8	ZMYND11		ART4
MPL	ZNF106		YBX2
MRI1	ZNF132		KIF15
MROH1	ZNF165		MSI1
MROH8	ZNF180		PCNX2
MRPL11	ZNF19		TFCP2L1
MRPL18	ZNF2		ASB16
MRPL19	ZNF213		ERVPABLB-1
MRPL2	ZNF280D		IGLV6-57
MRPL3	ZNF283		SLC25A33
MRPL36	ZNF33A		NFKBID
MRPL37	ZNF34		SCGB3A1
MRPL42	ZNF354C		MELTF
MRPL43	ZNF385A		PF4
MRPL46	ZNF467		LRRIQ4
MRPL51	ZNF484		WDR97
MRPL9	ZNF512		FBLN7
MRPS18C	ZNF512B		PLN
MRPS2	ZNF513		WNT7B
MRPS23	ZNF532		PARP11
MRTFA	ZNF548		REPS2
MSANTD1	ZNF606		SYT15
MSI2	ZNF638		SLC24A3
MSX2	ZNF639		ELMOD1
MT-ATP6	ZNF664		TRIP13
MTCH1	ZNF782		CXORF58
MT-CO3	ZNF789		FBXL21
MTERF2	ZNF805		PLCD3
MTERF4	ZNF827		ZNF613
MTMR6	ZNHIT3		MUC20
MTMR9	ZRANB1		SDK1
MT-ND2	ZUP1		ZNF470
MT-ND3	ZZEF1		TRDMT1
MT-ND5			ALPK2
MT-ND6			USH1C
MTSS1			ARL6
MTUS2			TMEM240
MUC13			COL17A1
MUC15			MYBPC2
MVP			NEU3
MXD4			PRKD1
MXI1			GPR15
MYBBP1A			ZNF568
MYEF2			GLIPR1
MYH6			NEMP2
MYL6			MED12L
MYL6B			DISP2
MYLPF			ANKRD55
MYNN			FOXL3
N4BP1			ZNF697
NAA35			SPATA6L
NAB2			INAVA
NACA			ZNF564
NACC1			MMP15
NADK2			KIF19
NAGK			MYOM1
NAP1L1			EIF4E1B
NAP1L2			VMN2R116
NAPA			IGLV10-54
NCK2			HMMR
NCKIPSD			ARHGAP15
NCLN			ALOX5AP
NCOA2			SLC6A7
NCOR2			AK9
NDEL1			SEMA4F
NDRG1			TYMS
NDRG3			MBOAT1
NDUFA1			BPIFC
NDUFA12			RTKN2
NDUFA13			SVBP
NDUFA2			LMOD1
NDUFA3			IFT27
NDUFA8			CNN1
NDUFA9			CYSLTR1
NDUFB11			BAIAP3
NDUFB5			RAB34
NDUFB8			KRTAP29-1
NDUFC2			AFP
NDUFS4			TRABD2B
NDUFS5			FAM187B
NDUFS8			TYRO3
NEBL			IGKV1-39
NECTIN1			DIXDC1
NECTIN2			FAAP100
NEDD8			T-ENOL
NEDD9			CLEC3B
NEIL1			IHH
NEPRO			CLRN3
NF2			ARL11
NFE2			SASS6
NFE2L2			FRZB
NFIA			TAF1B
NFKBIA			BDKRB2
NFYB			POLR3G
NGEF			FREM1
NGLY1			ERVK-25
NHLRC3			WDR31
NHSL1			ATP6AP1L
NID1			SPAG5
NKRF			FAM78B
NLGN4X			HIDE1
NLRC3			TMCC2
NLRP10			DUSP4
NME1			SPDL1
NME6			RSPH3
NME7			ZDHHC11B
NMRK1			CCDC92
NMS			KLRF2
NMUR1			ZNF584
NOA1			HRC
NOL7			DEF6
NOL8			OSR1
NOP53			GTSF1
NOS1AP			SH2D1B
NOTCH2			KLHDC9
NOTCH3			PWWP2B
NPAS3			KLC3
NPC1L1			MST1R
NPHP1			TTBK1
NPLOC4			GABRA3
NPM1			DDX25
NPPC			DNHD1
NPR1			CPI17
NPTXR			C11ORF95
NPVF			STAT4
NPY5R			CALHM2
NR1D1			SHC2
NR2C2AP			NEU4
NR2F1			ARL14
NR2F2			PATL2
NRL			CCDC180
NRN1			CCDC81
NRN1L			COX4I2
NRSN2			TICRR
NSG1			KRT7
NSMCE4A			ZAP70
NTAN1			PLA2G4B
NTNG2			PRSS53
NTPCR			BMX
NTS			EFHC1
NTSR1			KHDRBS3
NUAK1			FEZ1
NUDT2			DAGLA
NUDT21			EFNA5
NUDT5			LMNTD1
NUMA1			ZNF624
NUP155			GPSM1
NUP160			ZNF75A
NUP35			SHD
NUP93			RNF32
NUTF2			SPC25
OAZ1			CCDC191
OIP5			JSRP1
OLFM2			HEPH
OLFML3			S100A15A
OPRK1			ZNF541
OR2A25			KCNAB1
OR51E2			TMEM26
OR5K1			ZNF227
OSBP2			NUF2
OSGEPL1			ADAM11
OTOF			UCP1
OTOP2			NTN4
OTUB1			PRR36
OTUD5			CCDC121
OVOL1			ZNF567
OXCT1			NLRP5
OXSR1			CLNK
P2RX3			ZBTB32
PACS1			EPHB3
PADI4			LRP8
PAFAH1B2			IGLV5-39
PANX2			KIRREL3
PAPSS2			CDC20
PAQR3			IGLV7-46
PAQR6			GASK1A
PAXBP1			IL13RA2
PAXIP1			MLLT3
PBDC1			COL7A1
PBXIP1			SYCE1
PCNT			RNF207
PCNX3			SH2D3A
PCP4L1			FER1L5
PCSK2			SLC12A8
PCSK6			MTUS2
PDAP1			RGS12
PDCD6			ITGA2B
PDCL2			HACD1
PDE4A			TPX2
PDE5A			CENPE
PDE6C			RASA4B
PDE9A			LITAFD
PDHA1			EEPD1
PDIA4			COL21A1
PDXDC1			ZBED5
PDXP			DNAI4
PEDS1			MTFR2
PEF1			IQSEC3
PENK			SKP2
PEX11G			PBK
PEX19			TREML1
PEX3			SLAMF7
PF4			SLITRK2
PFDN6			IGLV1-50
PFKFB1			ZNF345
PFKFB2			PALM3
PFN1			FRAS1
PGAP3			PLA2G5
PGAP6			DPT
PGK1			TUBB2B
PGRMC2			NAV3
PHACTR3			SGSM2
PHF11			ZNF826P
PHF2			MTHFD2L
PHLPP1			SYTL3
PHPT1			CENPM
PHTF2			STYXL1
PHYH			SLC4A3
PI4K2B			NEU2
PI4KA			PDLIM3
PIANP			ZNF34
PIFO			EPS8L3
PIGQ			RTP3
PIGV			NREP
PIK3R2			TRAT1
PIK3R6			TSPAN32
PIN1			SIM2
PIN4			HJURP
PINK1			IL27RA
PITPNM2			KCNMB1
PJVK			ATP10A
PKD2			MNS1
PLBD2			MEIS3
PLEKHA2			WFDC1
PLEKHA8			FLT3
PLEKHB2			CD3G
PLEKHG1			DIAPH2-AS1
PLEKHM3			SERPINA9
PLGRKT			SMOC2
PLN			ZDHHC23
PLPP3			IGLV9-49
PLXNA1			RSPH9
PLXND1			CNTN2
PMEL			TSHZ3
PMEPA1			GABRE
PML			FPGT
PMPCA			SAMD15
PMS1			TIGIT
PNISR			DNPH1
PNMA5			ZNF286A
PNMA8A			LRRK2
PNOC			CCDC9B
PNPLA2			XPNPEP2
POLE4			GNB5
POLI			TRAF5
POLR1E			FMN1
POLR2B			IL10
POM121C			NUDT18
POMGNT2			DCK
POP7			GRK1
POU6F1			FERMT1
PPA1			IGH-1A
PPA2			FABP5
PPARD			NSG2
PPARGC1A			SLC6A20
PPDPF			TRIM63
PPIP5K2			UPK1B
PPM1L			SCT
PPME1			ARHGAP22
PPP1CA			ZWILCH
PPP1CB			GRM1
PPP1R10			CCDC85A
PPP1R13B			DSC1
PPP1R15A			PCMTD2
PPP1R21			CCDC175
PPP2R2C			ERICH4
PPP2R3B			CA9
PPP2R5B			FBXO44
PPP2R5D			SH3YL1
PPP3CA			TESC
PPP3R1			CDCA8
PRDX4			PRSS21
PREX1			SOX17
PRG3			EFNA3
PRG4			NFATC4
PRIM1			IL18R1
PRKAA1			GRAP2
PRKAB2			TMEM169
PRKACA			XKR6
PRKAR1A			CCL11
PRKCD			HSD3B
PRKX			TMPRSS12
PRLHR			PRRG3
PRMT1			GPR183
PRMT2			SPESP1
PROC			DDX3Y
PROCR			KDM5D
PROSER3			EIF1AY
PRPF3			GDF15
PRPF8			MUC2
PRPS1			ZG16
PRPS2			TRPV4
PRR14L			KRT20
PRR3			CTXND1
PRR5			ACOD1
PRRC2B			FOSL1
PRRG1			RBP2
PRRG3			FABP2
PRRG4			LCN2
PRTG			FOS
PRTN3			PVR
PRUNE1			COCH
PSMB4			HS3ST1
PSMC1			SLC15A1
PSMC2			WNT6
PSMC3			GPR84
PSMC5			FGF23
PSMC6			SLC4A11
PSMD14			REG4
PSMD8			IER3
PSMG3			MOXD1
PTBP3			CXCL6
PTGES			TICAM1
PTGES3			GVQW3
PTPN23			PPFIA2
PTPN5			PADI2
PTPRCAP			CNTN1
PTPRM			PDCL2
PTS			NRSN1
PTTG1IP			USP13
PUDP			CCDC122
PUM1			SLC6A1
PWP2			TFF3
PWWP2B			NEFM
PYCR1			SCD5
PYDC1			SLC17A7
PYROXD1			IGHV1-46
QDPR			MEP1B
QPRT			CLCA4
QRICH1			TFF2
R3HDM1			CRTAC1
RAB11FIP2			SI
RAB12			MREG
RAB14			NCAM1
RAB19			MUC17
RAB1A			C16ORF46
RAB1B			NR4A2
RAB23			ARRDC4
RAB38			GPRC5A
RAB3A			PMEL
RAB3IP			CHL1
RAB7			CADPS
RAB7A			GTF2IRD1
RAD21			FABP6
RAI1			SPINK4
RALA			ARMH4
RALB			GNAO1
RALGPS2			SCN2A
RAN			NEFH
RAPGEF1			SV2B
RAPGEF2			NSG1
RAPGEF6			MALL
RARA			CGAS
RARS1			ZNF500
RARS2			TH
RASA1			SLC22A1
RASA2			NFASC
RASAL1			RRAD
RASAL3			SYCP2
RASD1			SLC6A17
RASD2			PEG10
RASGRF1			TBX19
RASSF7			NTRK3
RASSF9			SEPTIN5
RB1			GRIN1
RBIS			SLC25A35
RBM19			TFPI
RBM20			ADAMTS12
RBM47			STMN2
RBM5			P2RY8
RBM6			SLC4A10
RBMX			TMEM59L
RBP2			TMPRSS15
RCAN1			GLI2
RCHY1			BPIFA1
REG4			ANGPT2
RELCH			MUC13
REM1			IL1R2
RENBP			PHGDH
REPIN1			BDMD1
RER1			NRXN1
RESP18			NPTXR
RETN			SYN1
RFC2			MSX1
RFC5			TMEM130
RFESD			SNAP91
RFX4			RSPO2
RGCC			PLB1
RGMA			MYO3A
RGMB			TMEM54
RGS2			PADI4
RGS22			SLC12A5
RGS5			GABBR2
RGS7BP			LRRN3
RGS9			DUSP18
RHAG			SPOCK1
RHCG			CALN1
RHOBTB3			PDZD9
RHOC			SRGAP3
RHOG			SEZ6L
RHOT1			SYT4
RHPN1			ZFPM2
RIBC2			KBTBD6
RIOK2			MAMLD1
RIPPLY2			HEBP2
RIPPLY3			CALHM5
RLN3			PRICKLE2
RMND5A			PPP2R2C
RNASEK			PHYHIP
RNF14			POU4F2
RNF157			TUBB3
RNF166			CORO2B
RNF175			AK1
RNF182			CNTN5
RNF187			SHANK1
RNF220			MELK
RNF31			FAM160A1
RNF4			LHFPL2
RNF44			GIMAP5
RNH1			BCL11B
ROBO4			UNC13A
RPA1			POU2F2
RPA2			NMNAT2
RPAP2			MPZ
RPE			AK4
RPIA			MTHFD2
RPL10			INA
RPL11			SPHK1
RPL17			KCNA2
RPL18			SATB2
RPL23			CCL25
RPL23A			GNG4
RPL24			NID2
RPL27			MYH1
RPL27A			SLC24A5
RPL28			HK3
RPL29			RUNDC3A
RPL30			CERS4
RPL31			SCG2
RPL32			HECTD2
RPL35A			ARMCX2
RPL37			ATP8A2
RPL37A			SGO2
RPL39			OPHN1
RPL7			MIS18BP1
RPL7L1			SOX8
RPL9			PTPRR
RPLP1			PTGER3
RPN2			RUNX3
RPP40			ZIC1
RPRD1A			TTC9
RPRD1B			FBXL16
RPS12			NLRC3
RPS13			SYP
RPS15A			MAP3K12
RPS17			SRCIN1
RPS19			SERPINB2
RPS20			AGR2
RPS21			DCLK3
RPS23			MEP1A
RPS24			ENPP7
RPS26			PLET1
RPS27			DIO2
RPS27A			PAIP2B
RPS28			ORAI2
RPS29			RPL3L
RPS3			ZIC2
RPS6KA6			RBFOX1
RPTOR			VAMP1
RPUSD1			NRXN2
RRAGD			CD40
RRM2			MAPK10
RRM2B			SYT13
RRP1B			OIP5
RRP8			OLFM4
RRP9			ANKFN1
RSBN1			CD6
RSPH14			FAT2
RSRC1			ALDH1A2
RUNDC1			KCNS3
RUNDC3B			CRMP1
RUSC1			CELF4
RWDD2A			SLC6A19
RXFP1			GPA33
RXRB			CARD11
RYR3			KCNC4
S100A1			ADGRE4
[truncated: 776 more rows]
