# Supplementary material for: Sex differences in gene expression and alternative splicing in the Chinese horseshoe bat
Source: PeerJ. 2023 Apr 24;11:e15231. doi: 10.7717/peerj.15231 (PMC10135408; doi:10.7717/peerj.15231)
Supplement: Table S11 — Significant terms and pathways with the q-value of 0.05 were shown in bold. Log (q-value) of −1.3 is equal to q-value of 0.05. Terms and pathways with uncorrected p < 0.01 were also shown. Log (p-value) of −2.2 is equal to p-value of 0.01. [file peerj-11-15231-s011.xlsx]

## Sheet: Brain-only DEGs
Category	GO	Description	LogP	Hits	Log(q-value)
GO Biological Processes	GO:0009060	aerobic respiration	-13	ACO1|ACO2|ATP5F1A|ATP5F1E|ATP5PO|CAT|COX6A2|COX6B1|COX6C|COX7A1|COX7A2P2|COX7B|COX15|CS|DGUOK|DLAT|IDH2|MSH2|ATP6|COX1|COX2|COX3|CYTB|ND1|ND2|ND3|ND4|ND5|ND6|NDUFA1|NDUFA2|NDUFA3|NDUFA7|NDUFA8|NDUFA9|NDUFB4|NDUFB5|NDUFB8|NDUFC2|NDUFS4|NDUFS5|NDUFS8|OGDH|PDHA1|SDHA|SDHB|SDHD|UQCRC1|UQCRH|SUCLG1|SUCLA2|COX7A2L|COX5A|ATP5MF|ATP5MG|ME3|UQCRQ|UQCR10|STOML2|NDUFA13|NDUFB11|SDHAF2|NDUFA12|MTFR1L|COQ9|TE…	-9.6
GO Biological Processes	GO:0006119	oxidative phosphorylation	-13	ATP5F1A|ATP5F1E|ATP5PO|COX6A2|COX6B1|COX6C|COX7A1|COX7A2P2|COX7B|COX15|DGUOK|MSH2|ATP6|COX1|COX2|COX3|CYTB|ND1|ND2|ND3|ND4|ND5|ND6|NDUFA1|NDUFA2|NDUFA3|NDUFA7|NDUFA8|NDUFA9|NDUFB4|NDUFB5|NDUFB8|NDUFC2|NDUFS4|NDUFS5|NDUFS8|SDHA|SDHB|SDHD|UQCRC1|UQCRH|COX7A2L|COX5A|ATP5MF|ATP5MG|UQCRQ|UQCR10|STOML2|NDUFA13|NDUFB11|SDHAF2|NDUFA12|COQ9|TEFM|COX6B2|COA6	-9.6
GO Biological Processes	GO:0045333	cellular respiration	-13	ACO1|ACO2|ATP5F1A|ATP5F1E|ATP5PO|CAT|COX6A2|COX6B1|COX6C|COX7A1|COX7A2P2|COX7B|COX15|CS|CYP1A2|DGUOK|DLAT|ETFA|IDH2|MSH2|ATP6|COX1|COX2|COX3|CYTB|ND1|ND2|ND3|ND4|ND5|ND6|NDUFA1|NDUFA2|NDUFA3|NDUFA7|NDUFA8|NDUFA9|NDUFB4|NDUFB5|NDUFB8|NDUFC2|NDUFS4|NDUFS5|NDUFS8|OGDH|PDHA1|SDHA|SDHB|SDHD|UQCRC1|UQCRH|SUCLG1|SUCLA2|COX7A2L|COX5A|ATP5MF|SLC25A13|MYBBP1A|ATP5MG|ME3|PPARGC1A|UQCRQ|UQCR10|STOML2|NDUFA13…	-9
GO Biological Processes	GO:0009206	purine ribonucleoside triphosphate biosynthetic process	-11	NUDT2|ATP5F1A|ATP5F1E|ATP5MC1|ATP5MC3|ATP6V0C|ATP5PO|DGUOK|ATP6|ND1|ND2|ND3|ND4|ND5|ND6|NDUFA1|NDUFA2|NDUFA3|NDUFA7|NDUFA8|NDUFA9|NDUFB4|NDUFB5|NDUFB8|NDUFC2|NDUFS4|NDUFS5|NDUFS8|NME1|SDHA|SDHB|SDHD|TGFB1|ATP5MF|SLC25A13|NME6|ATP5MG|DMAC2L|NME7|STOML2|NDUFA13|NDUFB11|NDUFA12|ATP5MK|AK9	-7.9
GO Biological Processes	GO:0006754	ATP biosynthetic process	-11	NUDT2|ATP5F1A|ATP5F1E|ATP5MC1|ATP5MC3|ATP6V0C|ATP5PO|DGUOK|ATP6|ND1|ND2|ND3|ND4|ND5|ND6|NDUFA1|NDUFA2|NDUFA3|NDUFA7|NDUFA8|NDUFA9|NDUFB4|NDUFB5|NDUFB8|NDUFC2|NDUFS4|NDUFS5|NDUFS8|SDHA|SDHB|SDHD|TGFB1|ATP5MF|SLC25A13|ATP5MG|DMAC2L|STOML2|NDUFA13|NDUFB11|NDUFA12|ATP5MK|AK9	-7.9
GO Biological Processes	GO:0042773	ATP synthesis coupled electron transport	-11	COX6A2|COX6B1|COX6C|COX7A1|COX7A2P2|COX7B|COX15|DGUOK|COX1|COX2|COX3|CYTB|ND1|ND2|ND3|ND4|ND5|ND6|NDUFA1|NDUFA2|NDUFA3|NDUFA7|NDUFA8|NDUFA9|NDUFB4|NDUFB5|NDUFB8|NDUFC2|NDUFS4|NDUFS5|NDUFS8|SDHA|SDHB|SDHD|UQCRC1|UQCRH|COX7A2L|COX5A|UQCRQ|UQCR10|SDHAF2|NDUFA12|COQ9|COA6	-7.9
GO Biological Processes	GO:0042775	mitochondrial ATP synthesis coupled electron transport	-11	COX6A2|COX6B1|COX6C|COX7A1|COX7A2P2|COX7B|COX15|DGUOK|COX1|COX2|COX3|CYTB|ND1|ND2|ND3|ND4|ND5|ND6|NDUFA1|NDUFA2|NDUFA3|NDUFA7|NDUFA8|NDUFA9|NDUFB4|NDUFB5|NDUFB8|NDUFC2|NDUFS4|NDUFS5|NDUFS8|SDHA|SDHB|SDHD|UQCRC1|UQCRH|COX7A2L|COX5A|UQCRQ|UQCR10|SDHAF2|NDUFA12|COQ9|COA6	-7.9
GO Biological Processes	GO:0009145	purine nucleoside triphosphate biosynthetic process	-11	NUDT2|ATP5F1A|ATP5F1E|ATP5MC1|ATP5MC3|ATP6V0C|ATP5PO|DGUOK|ATP6|ND1|ND2|ND3|ND4|ND5|ND6|NDUFA1|NDUFA2|NDUFA3|NDUFA7|NDUFA8|NDUFA9|NDUFB4|NDUFB5|NDUFB8|NDUFC2|NDUFS4|NDUFS5|NDUFS8|NME1|SDHA|SDHB|SDHD|TGFB1|ATP5MF|SLC25A13|NME6|ATP5MG|DMAC2L|NME7|STOML2|NDUFA13|NDUFB11|NDUFA12|ATP5MK|AK9	-7.9
GO Biological Processes	GO:0015980	energy derivation by oxidation of organic compounds	-11	ACO1|ACO2|ADRB3|AGL|ATP5F1A|ATP5F1E|ATP5PO|CAT|COX6A2|COX6B1|COX6C|COX7A1|COX7A2P2|COX7B|COX15|CS|CYP1A2|DGUOK|DLAT|ETFA|MTOR|IDH2|IL6ST|LEPR|MSH2|MT3|ATP6|COX1|COX2|COX3|CYTB|ND1|ND2|ND3|ND4|ND5|ND6|NDUFA1|NDUFA2|NDUFA3|NDUFA7|NDUFA8|NDUFA9|NDUFB4|NDUFB5|NDUFB8|NDUFC2|NDUFS4|NDUFS5|NDUFS8|OGDH|PDHA1|PPP1CA|PPP1CB|PPP1CC|PPP1R3C|SDHA|SDHB|SDHD|UQCRC1|UQCRH|SUCLG1|SUCLA2|COX7A2L|COX5A|ATP5MF|NR1D1…	-7.9
GO Biological Processes	GO:0022904	respiratory electron transport chain	-10	COX6A2|COX6B1|COX6C|COX7A1|COX7A2P2|COX7B|COX15|DGUOK|ETFA|COX1|COX2|COX3|CYTB|ND1|ND2|ND3|ND4|ND5|ND6|NDUFA1|NDUFA2|NDUFA3|NDUFA7|NDUFA8|NDUFA9|NDUFB4|NDUFB5|NDUFB8|NDUFC2|NDUFS4|NDUFS5|NDUFS8|SDHA|SDHB|SDHD|UQCRC1|UQCRH|COX7A2L|COX5A|SLC25A13|MYBBP1A|PPARGC1A|UQCRQ|UQCR10|SDHAF2|NDUFA12|COQ9|PINK1|SLC25A22|COA6	-7.3
GO Biological Processes	GO:0019646	aerobic electron transport chain	-10	COX6A2|COX6B1|COX6C|COX7A1|COX7A2P2|COX7B|COX15|COX1|COX2|COX3|CYTB|ND1|ND2|ND3|ND4|ND5|ND6|NDUFA1|NDUFA2|NDUFA3|NDUFA7|NDUFA8|NDUFA9|NDUFB4|NDUFB5|NDUFB8|NDUFC2|NDUFS4|NDUFS5|NDUFS8|SDHA|SDHB|SDHD|UQCRC1|UQCRH|COX7A2L|COX5A|UQCRQ|UQCR10|SDHAF2|COQ9	-7.2
GO Biological Processes	GO:0009201	ribonucleoside triphosphate biosynthetic process	-10	NUDT2|ATP5F1A|ATP5F1E|ATP5MC1|ATP5MC3|ATP6V0C|ATP5PO|DGUOK|ATP6|ND1|ND2|ND3|ND4|ND5|ND6|NDUFA1|NDUFA2|NDUFA3|NDUFA7|NDUFA8|NDUFA9|NDUFB4|NDUFB5|NDUFB8|NDUFC2|NDUFS4|NDUFS5|NDUFS8|NME1|SDHA|SDHB|SDHD|TGFB1|ATP5MF|SLC25A13|NME6|ATP5MG|DMAC2L|NME7|STOML2|NDUFA13|NDUFB11|NDUFA12|ATP5MK|AK9	-7.2
GO Biological Processes	GO:0006091	generation of precursor metabolites and energy	-9.6	ACO1|ACO2|ADH5|ADRB3|AGL|ALDH2|SLC25A4|ATP5F1A|ATP5F1E|ATP5PO|CAT|COX6A2|COX6B1|COX6C|COX7A1|COX7A2P2|COX7B|COX15|CS|CYB561|CYP1A2|DGUOK|DLAT|ETFA|MTOR|G6PD|GPI|IDH2|IL6ST|FOXK2|LEPR|MSH2|MT3|ATP6|COX1|COX2|COX3|CYTB|ND1|ND2|ND3|ND4|ND5|ND6|NDUFA1|NDUFA2|NDUFA3|NDUFA7|NDUFA8|NDUFA9|NDUFB4|NDUFB5|NDUFB8|NDUFC2|NDUFS4|NDUFS5|NDUFS8|OGDH|OXCT1|PDHA1|PFKFB1|PFKFB2|PFKP|PGAM2|PGK1|POMC|PPARD|PPP1CA|PP…	-6.6
GO Biological Processes	GO:0015986	proton motive force-driven ATP synthesis	-9.5	ATP5F1A|ATP5F1E|ATP5MC1|ATP5MC3|ATP6V0C|ATP5PO|ATP6|ND1|ND2|ND3|ND4|ND5|ND6|NDUFA1|NDUFA2|NDUFA3|NDUFA7|NDUFA8|NDUFA9|NDUFB4|NDUFB5|NDUFB8|NDUFC2|NDUFS4|NDUFS5|NDUFS8|SDHA|SDHB|SDHD|ATP5MF|ATP5MG|STOML2|NDUFA13|NDUFB11|NDUFA12|ATP5MK	-6.6
GO Biological Processes	GO:0042776	proton motive force-driven mitochondrial ATP synthesis	-8.8	ATP5F1A|ATP5F1E|ATP5PO|ATP6|ND1|ND2|ND3|ND4|ND5|ND6|NDUFA1|NDUFA2|NDUFA3|NDUFA7|NDUFA8|NDUFA9|NDUFB4|NDUFB5|NDUFB8|NDUFC2|NDUFS4|NDUFS5|NDUFS8|SDHA|SDHB|SDHD|ATP5MF|ATP5MG|STOML2|NDUFA13|NDUFB11|NDUFA12	-5.8
GO Biological Processes	GO:0009142	nucleoside triphosphate biosynthetic process	-8.5	AK1|NUDT2|ATP5F1A|ATP5F1E|ATP5MC1|ATP5MC3|ATP6V0C|ATP5PO|DGUOK|ATP6|ND1|ND2|ND3|ND4|ND5|ND6|NDUFA1|NDUFA2|NDUFA3|NDUFA7|NDUFA8|NDUFA9|NDUFB4|NDUFB5|NDUFB8|NDUFC2|NDUFS4|NDUFS5|NDUFS8|NME1|SDHA|SDHB|SDHD|TGFB1|ATP5MF|SLC25A13|NME6|ATP5MG|DMAC2L|NME7|STOML2|NDUFA13|NDUFB11|NDUFA12|ATP5MK|AK9	-5.6
GO Biological Processes	GO:0022900	electron transport chain	-7.4	ADH5|ALDH2|COX6A2|COX6B1|COX6C|COX7A1|COX7A2P2|COX7B|COX15|CYB561|CYP1A2|DGUOK|ETFA|COX1|COX2|COX3|CYTB|ND1|ND2|ND3|ND4|ND5|ND6|NDUFA1|NDUFA2|NDUFA3|NDUFA7|NDUFA8|NDUFA9|NDUFB4|NDUFB5|NDUFB8|NDUFC2|NDUFS4|NDUFS5|NDUFS8|QDPR|SDHA|SDHB|SDHD|UQCRC1|UQCRH|COX7A2L|COX5A|SLC25A13|MYBBP1A|PPARGC1A|UQCRQ|UQCR10|GLRX2|SDHAF2|NDUFA12|COQ9|PINK1|STEAP4|SLC25A22|FDX2|COA6	-4.6
GO Biological Processes	GO:0046034	ATP metabolic process	-7.4	AK1|NUDT2|ATP5F1A|ATP5F1E|ATP5MC1|ATP5MC3|ATP6V0C|ATP5PO|DGUOK|GPI|FOXK2|ATP6|ND1|ND2|ND3|ND4|ND5|ND6|MYH6|NDUFA1|NDUFA2|NDUFA3|NDUFA7|NDUFA8|NDUFA9|NDUFB4|NDUFB5|NDUFB8|NDUFC2|NDUFS4|NDUFS5|NDUFS8|OGDH|PFKFB1|PFKFB2|PFKP|PGAM2|PGK1|SDHA|SDHB|SDHD|TGFB1|ATP5MF|SLC25A13|ATP5MG|NUDT5|DMAC2L|STOML2|NDUFA13|NDUFB11|NDUFA12|FIGNL1|ATP5MK|AK9|ENO4	-4.6
GO Biological Processes	GO:0009205	purine ribonucleoside triphosphate metabolic process	-7.3	AK1|NUDT2|ATP5F1A|ATP5F1E|ATP5MC1|ATP5MC3|ATP6V0C|ATP5PO|DGUOK|GPI|FOXK2|ATP6|ND1|ND2|ND3|ND4|ND5|ND6|MYH6|NDUFA1|NDUFA2|NDUFA3|NDUFA7|NDUFA8|NDUFA9|NDUFB4|NDUFB5|NDUFB8|NDUFC2|NDUFS4|NDUFS5|NDUFS8|NME1|OGDH|PFKFB1|PFKFB2|PFKP|PGAM2|PGK1|RAN|SDHA|SDHB|SDHD|TGFB1|ATP5MF|GTPBP1|SLC25A13|NME6|ATP5MG|NUDT5|DMAC2L|NME7|STOML2|NDUFA13|RAB23|NDUFB11|NDUFA12|FIGNL1|ATP5MK|AK9|ENO4	-4.6
GO Biological Processes	GO:0009144	purine nucleoside triphosphate metabolic process	-6.9	AK1|NUDT2|ATP5F1A|ATP5F1E|ATP5MC1|ATP5MC3|ATP6V0C|ATP5PO|DGUOK|GPI|FOXK2|ATP6|ND1|ND2|ND3|ND4|ND5|ND6|MYH6|NDUFA1|NDUFA2|NDUFA3|NDUFA7|NDUFA8|NDUFA9|NDUFB4|NDUFB5|NDUFB8|NDUFC2|NDUFS4|NDUFS5|NDUFS8|NME1|OGDH|PFKFB1|PFKFB2|PFKP|PGAM2|PGK1|RAN|SDHA|SDHB|SDHD|TGFB1|ATP5MF|GTPBP1|SLC25A13|NME6|ATP5MG|NUDT5|DMAC2L|NME7|STOML2|NDUFA13|RAB23|NDUFB11|NDUFA12|FIGNL1|ATP5MK|AK9|ENO4	-4.2
GO Biological Processes	GO:0009199	ribonucleoside triphosphate metabolic process	-6.7	AK1|NUDT2|ATP5F1A|ATP5F1E|ATP5MC1|ATP5MC3|ATP6V0C|ATP5PO|DGUOK|GPI|FOXK2|ATP6|ND1|ND2|ND3|ND4|ND5|ND6|MYH6|NDUFA1|NDUFA2|NDUFA3|NDUFA7|NDUFA8|NDUFA9|NDUFB4|NDUFB5|NDUFB8|NDUFC2|NDUFS4|NDUFS5|NDUFS8|NME1|OGDH|PFKFB1|PFKFB2|PFKP|PGAM2|PGK1|RAN|SDHA|SDHB|SDHD|TGFB1|ATP5MF|GTPBP1|SLC25A13|NME6|ATP5MG|NUDT5|DMAC2L|NME7|STOML2|NDUFA13|RAB23|NDUFB11|NDUFA12|FIGNL1|ATP5MK|AK9|ENO4	-3.9
GO Biological Processes	GO:0009152	purine ribonucleotide biosynthetic process	-6.4	ADCY1|ADCY5|AK1|NUDT2|ATP5F1A|ATP5F1E|ATP5MC1|ATP5MC3|ATP6V0C|ATP5PO|DGUOK|DLAT|ACSL4|GART|HPRT1|ATP6|ND1|ND2|ND3|ND4|ND5|ND6|MMUT|NDUFA1|NDUFA2|NDUFA3|NDUFA7|NDUFA8|NDUFA9|NDUFB4|NDUFB5|NDUFB8|NDUFC2|NDUFS4|NDUFS5|NDUFS8|NME1|NPPC|NPR1|PDHA1|PRPS2|SDHA|SDHB|SDHD|TGFB1|PAPSS2|TECR|ATP5MF|SLC25A13|NME6|ATP5MG|SLC27A2|DMAC2L|NME7|STOML2|NDUFA13|NDUFB11|ADCY10|NDUFA12|ELOVL5|ATP5MK|AK9	-3.7
GO Biological Processes	GO:1902600	proton transmembrane transport	-6.3	SLC25A4|SLC25A5|ATP1A3|ATP5F1A|ATP5F1E|ATP5MC1|ATP5MC3|ATP6V0C|ATP6V0A1|ATP6AP1|ATP5PO|CLCN3|COX6B1|COX7A1|COX7B|COX15|ATP6|COX1|COX2|COX3|CYTB|ND4|ND5|SLC25A3|SLC15A1|SLC16A1|UQCRC1|UQCRH|COX7A2L|COX5A|ATP5MF|ATP6AP2|TCIRG1|ATP5MG|DMAC2L|UQCR10|SLC15A3|SLC25A22|SLC4A11|OTOP2|ATP6V0E2|ATP6V0D2|RNASEK	-3.6
GO Biological Processes	GO:0046390	ribose phosphate biosynthetic process	-6	ADCY1|ADCY5|AK1|NUDT2|ATP5F1A|ATP5F1E|ATP5MC1|ATP5MC3|ATP6V0C|ATP5PO|CDA|DGUOK|DLAT|ACSL4|G6PD|GART|HPRT1|ATP6|ND1|ND2|ND3|ND4|ND5|ND6|MMUT|NDUFA1|NDUFA2|NDUFA3|NDUFA7|NDUFA8|NDUFA9|NDUFB4|NDUFB5|NDUFB8|NDUFC2|NDUFS4|NDUFS5|NDUFS8|NME1|NPPC|NPR1|PDHA1|PRPS1|PRPS2|SDHA|SDHB|SDHD|TGFB1|TKT|PAPSS2|TECR|ATP5MF|SLC25A13|NME6|ATP5MG|SLC27A2|DMAC2L|NME7|STOML2|NDUFA13|NDUFB11|ADCY10|NDUFA12|ELOVL5|ATP5M…	-3.3
GO Biological Processes	GO:0006164	purine nucleotide biosynthetic process	-5.8	ADCY1|ADCY5|AK1|NUDT2|ATP5F1A|ATP5F1E|ATP5MC1|ATP5MC3|ATP6V0C|ATP5PO|DGUOK|DLAT|ACSL4|GART|HPRT1|ATP6|ND1|ND2|ND3|ND4|ND5|ND6|MMUT|NDUFA1|NDUFA2|NDUFA3|NDUFA7|NDUFA8|NDUFA9|NDUFB4|NDUFB5|NDUFB8|NDUFC2|NDUFS4|NDUFS5|NDUFS8|NME1|NPPC|NPR1|PDHA1|PRPS1|PRPS2|SDHA|SDHB|SDHD|TGFB1|KMO|PAPSS2|TECR|ATP5MF|NAMPT|SLC25A13|NME6|ATP5MG|SLC27A2|QPRT|DMAC2L|NME7|STOML2|NDUFA13|NDUFB11|NMRK1|ADCY10|NDUFA12|ELOV…	-3.1
GO Biological Processes	GO:0009260	ribonucleotide biosynthetic process	-5.5	ADCY1|ADCY5|AK1|NUDT2|ATP5F1A|ATP5F1E|ATP5MC1|ATP5MC3|ATP6V0C|ATP5PO|CDA|DGUOK|DLAT|ACSL4|GART|HPRT1|ATP6|ND1|ND2|ND3|ND4|ND5|ND6|MMUT|NDUFA1|NDUFA2|NDUFA3|NDUFA7|NDUFA8|NDUFA9|NDUFB4|NDUFB5|NDUFB8|NDUFC2|NDUFS4|NDUFS5|NDUFS8|NME1|NPPC|NPR1|PDHA1|PRPS2|SDHA|SDHB|SDHD|TGFB1|PAPSS2|TECR|ATP5MF|SLC25A13|NME6|ATP5MG|SLC27A2|DMAC2L|NME7|STOML2|NDUFA13|NDUFB11|ADCY10|NDUFA12|ELOVL5|ATP5MK|AK9	-2.9
GO Biological Processes	GO:0009260	ribonucleotide biosynthetic process	-5.5	ADCY1|ADCY5|AK1|NUDT2|ATP5F1A|ATP5F1E|ATP5MC1|ATP5MC3|ATP6V0C|ATP5PO|CDA|DGUOK|DLAT|ACSL4|GART|HPRT1|ATP6|ND1|ND2|ND3|ND4|ND5|ND6|MMUT|NDUFA1|NDUFA2|NDUFA3|NDUFA7|NDUFA8|NDUFA9|NDUFB4|NDUFB5|NDUFB8|NDUFC2|NDUFS4|NDUFS5|NDUFS8|NME1|NPPC|NPR1|PDHA1|PRPS2|SDHA|SDHB|SDHD|TGFB1|PAPSS2|TECR|ATP5MF|SLC25A13|NME6|ATP5MG|SLC27A2|DMAC2L|NME7|STOML2|NDUFA13|NDUFB11|ADCY10|NDUFA12|ELOVL5|ATP5MK|AK9	-2.9
GO Biological Processes	GO:0009141	nucleoside triphosphate metabolic process	-5.5	AK1|NUDT2|ATP5F1A|ATP5F1E|ATP5MC1|ATP5MC3|ATP6V0C|ATP5PO|DGUOK|GPI|FOXK2|ATP6|ND1|ND2|ND3|ND4|ND5|ND6|MYH6|NDUFA1|NDUFA2|NDUFA3|NDUFA7|NDUFA8|NDUFA9|NDUFB4|NDUFB5|NDUFB8|NDUFC2|NDUFS4|NDUFS5|NDUFS8|NME1|OGDH|PFKFB1|PFKFB2|PFKP|PGAM2|PGK1|RAN|SDHA|SDHB|SDHD|TGFB1|ATP5MF|GTPBP1|SLC25A13|NME6|ATP5MG|NUDT5|DMAC2L|NME7|STOML2|RRM2B|NDUFA13|RAB23|NDUFB11|NDUFA12|FIGNL1|ATP5MK|AK9|ENO4	-2.8
GO Biological Processes	GO:0006412	translation	-5.4	ABCF1|ASMT|CARS1|DRG2|EEF1B2|EEF2|ETF1|FARSA|HARS1|EIF6|MARS1|NDUFA7|RARS1|ABCE1|RPL7|RPL9|RPL10|RPL11|RPL17|RPL18|RPL23A|RPL24|RPL27|RPL30|RPL27A|RPL28|RPL29|RPL31|RPL32|RPL35A|RPL37|RPL37A|RPL39|RPLP1|MRPL12|RPS3|RPS12|RPS13|RPS15A|RPS17|RPS19|RPS20|RPS21|RPS23|RPS24|RPS26|RPS27|RPS27A|RPS28|RPS29|TARS1|SLBP|YARS1|EIF3D|EIF3J|EIF2S2|EIF1AY|RPL23|MRPL33|GTPBP1|MRPL19|FARSB|EIF1|TNIP1|COPS5|MRPL3…	-2.8
GO Biological Processes	GO:0033108	mitochondrial respiratory chain complex assembly	-5.4	ND1|ND2|ND4|ND5|ND6|NDUFA1|NDUFA2|NDUFA3|NDUFA8|NDUFA9|NDUFB4|NDUFB5|NDUFB8|NDUFC2|NDUFS4|NDUFS5|NDUFS8|AIFM1|COX17|NDUFA13|COX16|NDUFB11|SDHAF2|NDUFA12|NDUFAF5|NUBPL|TMEM126A|SLC25A33|UQCC2|COX14|DMAC1|NDUFAF2|SMIM20|COA5|UQCC6|PET100	-2.8
GO Biological Processes	GO:0010257	NADH dehydrogenase complex assembly	-5.1	ND1|ND2|ND4|ND5|ND6|NDUFA1|NDUFA2|NDUFA3|NDUFA8|NDUFA9|NDUFB4|NDUFB5|NDUFB8|NDUFC2|NDUFS4|NDUFS5|NDUFS8|NDUFA13|NDUFB11|NDUFA12|NDUFAF5|NUBPL|TMEM126A|DMAC1|NDUFAF2	-2.5
GO Biological Processes	GO:0032981	mitochondrial respiratory chain complex I assembly	-5.1	ND1|ND2|ND4|ND5|ND6|NDUFA1|NDUFA2|NDUFA3|NDUFA8|NDUFA9|NDUFB4|NDUFB5|NDUFB8|NDUFC2|NDUFS4|NDUFS5|NDUFS8|NDUFA13|NDUFB11|NDUFA12|NDUFAF5|NUBPL|TMEM126A|DMAC1|NDUFAF2	-2.5
GO Biological Processes	GO:0072522	purine-containing compound biosynthetic process	-5.1	ADCY1|ADCY5|AK1|NUDT2|ATP5F1A|ATP5F1E|ATP5MC1|ATP5MC3|ATP6V0C|ATP5PO|DGUOK|DLAT|ACSL4|GART|HPRT1|ATP6|ND1|ND2|ND3|ND4|ND5|ND6|MMUT|NDUFA1|NDUFA2|NDUFA3|NDUFA7|NDUFA8|NDUFA9|NDUFB4|NDUFB5|NDUFB8|NDUFC2|NDUFS4|NDUFS5|NDUFS8|NME1|NPPC|NPR1|PDHA1|PRPS1|PRPS2|SDHA|SDHB|SDHD|TGFB1|KMO|PAPSS2|TECR|ATP5MF|NAMPT|SLC25A13|NME6|ATP5MG|SLC27A2|QPRT|DMAC2L|NME7|STOML2|NDUFA13|NDUFB11|NMRK1|ADCY10|NDUFA12|ELOV…	-2.5
GO Biological Processes	GO:0002181	cytoplasmic translation	-4.8	DRG2|ETF1|RPL7|RPL9|RPL10|RPL11|RPL17|RPL18|RPL23A|RPL24|RPL27|RPL30|RPL27A|RPL28|RPL29|RPL31|RPL32|RPL35A|RPL37|RPL37A|RPL39|RPLP1|RPS3|RPS12|RPS13|RPS15A|RPS17|RPS19|RPS20|RPS21|RPS23|RPS24|RPS26|RPS27|RPS27A|RPS28|RPS29|SLBP|EIF3D|EIF3J|EIF2S2|RPL23	-2.2
GO Biological Processes	GO:0006120	mitochondrial electron transport, NADH to ubiquinone	-4.7	ND1|ND2|ND3|ND4|ND5|ND6|NDUFA1|NDUFA2|NDUFA3|NDUFA7|NDUFA8|NDUFA9|NDUFB4|NDUFB5|NDUFB8|NDUFC2|NDUFS4|NDUFS5|NDUFS8|COQ9	-2.1
GO Biological Processes	GO:0009165	nucleotide biosynthetic process	-4.4	ADCY1|ADCY5|AK1|NUDT2|ATP5F1A|ATP5F1E|ATP5MC1|ATP5MC3|ATP6V0C|ATP5PO|CDA|DGUOK|DLAT|ACSL4|GART|HPRT1|ATP6|ND1|ND2|ND3|ND4|ND5|ND6|MMUT|NDUFA1|NDUFA2|NDUFA3|NDUFA7|NDUFA8|NDUFA9|NDUFB4|NDUFB5|NDUFB8|NDUFC2|NDUFS4|NDUFS5|NDUFS8|NME1|NPPC|NPR1|PDHA1|PRPS1|PRPS2|RRM2|SDHA|SDHB|SDHD|TGFB1|KMO|PAPSS2|TECR|ATP5MF|NAMPT|SLC25A13|NME6|ATP5MG|SLC27A2|QPRT|DMAC2L|NME7|STOML2|RRM2B|NDUFA13|NDUFB11|NMRK1|ADCY…	-1.8
GO Biological Processes	GO:1901293	nucleoside phosphate biosynthetic process	-4.2	ADCY1|ADCY5|AK1|NUDT2|ATP5F1A|ATP5F1E|ATP5MC1|ATP5MC3|ATP6V0C|ATP5PO|CDA|DGUOK|DLAT|ACSL4|GART|HPRT1|ATP6|ND1|ND2|ND3|ND4|ND5|ND6|MMUT|NDUFA1|NDUFA2|NDUFA3|NDUFA7|NDUFA8|NDUFA9|NDUFB4|NDUFB5|NDUFB8|NDUFC2|NDUFS4|NDUFS5|NDUFS8|NME1|NPPC|NPR1|PDHA1|PRPS1|PRPS2|RRM2|SDHA|SDHB|SDHD|TGFB1|KMO|PAPSS2|TECR|ATP5MF|NAMPT|SLC25A13|NME6|ATP5MG|SLC27A2|QPRT|DMAC2L|NME7|STOML2|RRM2B|NDUFA13|NDUFB11|NMRK1|ADCY…	-1.7
GO Biological Processes	GO:1901293	nucleoside phosphate biosynthetic process	-4.2	ADCY1|ADCY5|AK1|NUDT2|ATP5F1A|ATP5F1E|ATP5MC1|ATP5MC3|ATP6V0C|ATP5PO|CDA|DGUOK|DLAT|ACSL4|GART|HPRT1|ATP6|ND1|ND2|ND3|ND4|ND5|ND6|MMUT|NDUFA1|NDUFA2|NDUFA3|NDUFA7|NDUFA8|NDUFA9|NDUFB4|NDUFB5|NDUFB8|NDUFC2|NDUFS4|NDUFS5|NDUFS8|NME1|NPPC|NPR1|PDHA1|PRPS1|PRPS2|RRM2|SDHA|SDHB|SDHD|TGFB1|KMO|PAPSS2|TECR|ATP5MF|NAMPT|SLC25A13|NME6|ATP5MG|SLC27A2|QPRT|DMAC2L|NME7|STOML2|RRM2B|NDUFA13|NDUFB11|NMRK1|ADCY…	-1.7
GO Biological Processes	GO:0006123	mitochondrial electron transport, cytochrome c to oxygen	-3.7	COX6A2|COX6B1|COX6C|COX7A1|COX7A2P2|COX7B|COX15|COX1|COX2|COX3|COX7A2L|COX5A	-1.2
GO Biological Processes	GO:0060316	positive regulation of ryanodine-sensitive calcium-release channel activity	-3.5	CALM1|GSTO1|AKAP6|TRDN|JPH2	-1
GO Biological Processes	GO:0015670	carbon dioxide transport	-3.5	AQP1|AQP4|CA2|HBB|RHAG	-1
GO Biological Processes	GO:0007035	vacuolar acidification	-3.4	ATP6V0C|ATP6V0A1|ATP6AP1|GRN|ATP6AP2|TCIRG1|DMXL2|SNAPIN|CLIC4|CCDC115|TMEM199|ATP6V0E2|ATP6V0D2|TMEM9|RNASEK	-0.96
GO Biological Processes	GO:0051452	intracellular pH reduction	-3.1	ATP6V0C|ATP6V0A1|ATP6AP1|CA2|CLCN3|GRN|RAB7A|ATP6AP2|TCIRG1|DMXL2|SNAPIN|RAB38|CLIC4|CCDC115|TMEM199|ATP6V0E2|ATP6V0D2|TMEM9|RNASEK	-0.65
GO Biological Processes	GO:0007042	lysosomal lumen acidification	-3	ATP6V0C|ATP6V0A1|ATP6AP1|GRN|ATP6AP2|TCIRG1|SNAPIN|CCDC115|TMEM199|TMEM9|RNASEK	-0.56
GO Biological Processes	GO:0043409	negative regulation of MAPK cascade	-2.9	ABL1|AGT|APOE|BMP4|DUSP1|DUSP6|DUSP7|DUSP8|EPHB2|FBLN1|GBP1|GPS2|HMGCR|PRMT1|IGBP1|LYN|MEN1|NF2|PEBP1|PER1|PIK3R2|PIN1|PPIA|PRKCD|RGS2|SMPD1|TIMP3|EZR|ITGB1BP1|NCOR1|SPRY2|TNIP1|NUP62|RPS6KA6|DUSP13|DACT1|ERRFI1|PINK1|DUSP26|SIRPA|PAQR3|DAB2IP|CNKSR3|FLCN	-0.48
GO Biological Processes	GO:0051281	positive regulation of release of sequestered calcium ion into cytosol	-2.8	ABL1|CALM1|CD19|HTT|CXCL10|NTSR1|PKD2|SRI|THY1|GSTO1|AKAP6|TRDN|JPH2	-0.4
GO Biological Processes	GO:0036072	direct ossification	-2.8	MMP2|MN1|AXIN2|FGF18|GIT1	-0.39
GO Biological Processes	GO:1901873	regulation of post-translational protein modification	-2.8	ABCA2|EGR1|UBE2B|CRTAP|FLCN	-0.39
GO Biological Processes	GO:0001957	intramembranous ossification	-2.8	MMP2|MN1|AXIN2|FGF18|GIT1	-0.39
GO Biological Processes	GO:0051490	negative regulation of filopodium assembly	-2.8	CAPZB|PRKCD|ARHGAP44|RAB3IP	-0.39
GO Biological Processes	GO:0019755	one-carbon compound transport	-2.7	AQP1|AQP4|AQP9|CA2|HBB|RHAG|SLC14A1	-0.31
GO Biological Processes	GO:0006991	response to sterol depletion	-2.7	INSIG1|LYN|SREBF2|ERLIN2|NPC1L1|INSIG2|EIF2A	-0.31
GO Biological Processes	GO:0006390	mitochondrial transcription	-2.6	MRPL12|MTERF3|TFB1M|TFB2M|TEFM|MTERF2|SLC25A33|MTERF4	-0.23
GO Biological Processes	GO:0071501	cellular response to sterol depletion	-2.5	INSIG1|SREBF2|ERLIN2|NPC1L1|INSIG2|EIF2A	-0.14
GO Biological Processes	GO:0051280	negative regulation of release of sequestered calcium ion into cytosol	-2.5	CALM1|NTSR1|PKD2|SRI|GSTO1|TRDN	-0.14
GO Biological Processes	GO:0006099	tricarboxylic acid cycle	-2.5	ACO1|ACO2|CS|DLAT|IDH2|OGDH|PDHA1|SDHA|SDHB|SDHD|SUCLG1|SUCLA2|SDHAF2	-0.14
GO Biological Processes	GO:0034101	erythrocyte homeostasis	-2.4	SLC25A5|BCL6|BMP4|DNASE2|EPAS1|EPB42|G6PD|GPI|KIT|LYN|PKNOX1|RB1|RHAG|RPS17|RPS19|RPS24|SLC4A1|SRF|TAL1|BAP1|PTBP3|TRIM10|MAEA|CITED2|ACIN1|ABCB10|AHSP|ATP5IF1|SFXN1|HSCB	-0.024
GO Biological Processes	GO:2000104	negative regulation of DNA-templated DNA replication	-2.4	BCL6|BLM|BRCA2|FBXO5|DONSON|SMARCAL1|GMNN|CAMSAP3	-0.024
GO Biological Processes	GO:0070071	proton-transporting two-sector ATPase complex assembly	-2.4	TM9SF4|TMEM70|CCDC115|ATP23|ATPAF2|TMEM199|FMC1|TMEM9	-0.024
GO Biological Processes	GO:0051591	response to cAMP	-2.3	APEX1|BIRC2|AQP1|AQP9|HCN2|ZFP36L1|BSG|CDO1|FBP1|RAPGEF1|NDUFS4|PENK|PER1|PFKFB1|PKD2|SLC6A3|STAT1|VGF|EZR|AKAP6|RAPGEF2|CARM1|EEF2K|DUOX2|DUOX1	-0.01
GO Biological Processes	GO:0007182	common-partner SMAD protein phosphorylation	-2.3	BMP4|PML|SPTBN1|TGFB1|TGFBR2	-0.01
GO Biological Processes	GO:0071286	cellular response to magnesium ion	-2.3	FBP1|RYR3|SMPD3|SLC41A1|SLFN14	-0.01
GO Biological Processes	GO:0060433	bronchus development	-2.3	BMP4|SOX9|SRF|TGFBR2|WNT7B	-0.01
GO Biological Processes	GO:0090649	response to oxygen-glucose deprivation	-2.3	ATF4|BNIP2|BNIP3|NPPC|AIFM1	-0.01
GO Biological Processes	GO:0035751	regulation of lysosomal lumen pH	-2.3	ATP6V0C|ATP6V0A1|ATP6AP1|GRN|ATP6AP2|TCIRG1|SNAPIN|TMEM165|CCDC115|TMEM199|TMEM9|RNASEK	0
GO Biological Processes	GO:1903170	negative regulation of calcium ion transmembrane transport	-2.2	ADRA2A|CALM1|NTSR1|PKD2|PLN|PPP3CA|PPP3R1|SRI|TMBIM6|GSTO1|TRDN|REM1|FBXO11	0
GO Biological Processes	GO:0060314	regulation of ryanodine-sensitive calcium-release channel activity	-2.2	CALM1|PKD2|PLN|PRKACA|SRI|GSTO1|AKAP6|TRDN|JPH2|JPH3	0
GO Biological Processes	GO:0032272	negative regulation of protein polymerization	-2.2	ADD1|CAPZB|CDH5|FLII|STMN1|PFN1|PRKCD|TWF1|SPTA1|SPTAN1|SPTBN1|SPTBN2|TMSB4X|VDAC2|MKKS|TMSB10|TMSB15A|STMN2|TRIOBP|EML2|VILL|SSH2	0
GO Biological Processes	GO:0051284	positive regulation of sequestering of calcium ion	-2.2	CALM1|NTSR1|PKD2|SRI|GSTO1|TRDN	0
GO Biological Processes	GO:0018149	peptide cross-linking	-2.2	ANXA1|BGN|COL3A1|DCN|EPB42|F13B|TGM1|TGM2|TGM5	0
GO Biological Processes	GO:1903142	positive regulation of establishment of endothelial barrier	-2.2	ADD1|CDH5|PROC|S1PR2	0
GO Biological Processes	GO:0090261	positive regulation of inclusion body assembly	-2.2	CDC34|HSF1|PSMC5|PSMC6	0
GO Biological Processes	GO:1902527	positive regulation of protein monoubiquitination	-2.2	BIRC2|PDCD6|FANCM|PEF1	0
GO Biological Processes	GO:0070940	dephosphorylation of RNA polymerase II C-terminal domain	-2.2	SSU72|RPRD1A|RPRD1B|RPAP2	0
GO Biological Processes	GO:1901552	positive regulation of endothelial cell development	-2.2	ADD1|CDH5|PROC|S1PR2	0
GO Biological Processes	GO:0006121	mitochondrial electron transport, succinate to ubiquinone	-2.2	SDHA|SDHB|SDHD|SDHAF2	0
GO Biological Processes	GO:0060534	trachea cartilage development	-2.2	RARA|SOX9|SRF|WNT7B	0
GO Biological Processes	GO:0097094	craniofacial suture morphogenesis	-2.2	BMP4|FOXN3|MEGF8|INSIG1|MSX2|INSIG2|RAB23	0
GO Biological Processes	GO:0048388	endosomal lumen acidification	-2.2	ATP6V0C|ATP6V0A1|ATP6AP1|CLCN3|ATP6AP2|TMEM9|RNASEK	0
GO Biological Processes	GO:1900153	positive regulation of nuclear-transcribed mRNA catabolic process, deadenylation-dependent decay	-2.2	ZFP36L1|ZFP36|TOB1|PABPC1|AGO2|DHX36|NANOS3	0
GO Biological Processes	GO:0051453	regulation of intracellular pH	-2.1	ATP6V0C|ATP6V0A1|ATP6AP1|CA2|CLCN3|GRN|SLC4A1|SLC9A5|RAB7A|TM9SF4|ATP6AP2|TCIRG1|DMXL2|SNAPIN|RAB38|CLIC4|TMEM165|CCDC115|TMEM199|ATP6V0E2|ATP6V0D2|TMEM9|SLC9C1|SLC9A4|RNASEK	0
GO Biological Processes	GO:0010716	negative regulation of extracellular matrix disassembly	-2.1	CST3|DPP4|TGFB1	0
GO Biological Processes	GO:1904582	positive regulation of intracellular mRNA localization	-2.1	ZFP36L1|ZFP36|DHX36	0
GO Biological Processes	GO:0060018	astrocyte fate commitment	-2.1	SOX9|TAL1|SOX8	0
GO Biological Processes	GO:1905857	positive regulation of pentose-phosphate shunt	-2.1	MTOR|RPTOR|MLST8	0
GO Biological Processes	GO:0042360	vitamin E metabolic process	-2.1	NQO1|PLTP|NPC1L1	0
GO Biological Processes	GO:2000170	positive regulation of peptidyl-cysteine S-nitrosylation	-2.1	ACE|TXN|NOS1AP	0
GO Biological Processes	GO:0030252	growth hormone secretion	-2.1	GHSR|CDK16|RAB1A	0
GO Biological Processes	GO:0061975	articular cartilage development	-2.1	BGN|PBXIP1|IFT80	0
GO Biological Processes	GO:0030218	erythrocyte differentiation	-2.1	SLC25A5|BCL6|BMP4|DNASE2|EPAS1|EPB42|G6PD|KIT|LYN|PKNOX1|RB1|RHAG|RPS19|SLC4A1|SRF|TAL1|BAP1|PTBP3|TRIM10|MAEA|CITED2|ACIN1|ABCB10|AHSP|ATP5IF1|SFXN1|HSCB	0
GO Biological Processes	GO:0006885	regulation of pH	-2	ATP6V0C|ATP6V0A1|ATP6AP1|CA2|CLCN3|GRN|SLC26A4|SLC4A1|SLC9A5|RAB7A|TM9SF4|ATP6AP2|TCIRG1|DMXL2|SNAPIN|RAB38|CLIC4|RHCG|TMEM165|CCDC115|LACC1|TMEM199|ATP6V0E2|ATP6V0D2|TMEM9|SLC9C1|SLC9A4|RNASEK	0
GO Biological Processes	GO:0030641	regulation of cellular pH	-2	ATP6V0C|ATP6V0A1|ATP6AP1|CA2|CLCN3|GRN|SLC4A1|SLC9A5|RAB7A|TM9SF4|ATP6AP2|TCIRG1|DMXL2|SNAPIN|RAB38|CLIC4|TMEM165|CCDC115|LACC1|TMEM199|ATP6V0E2|ATP6V0D2|TMEM9|SLC9C1|SLC9A4|RNASEK	0
GO Biological Processes	GO:0031440	regulation of mRNA 3'-end processing	-2	ZFP36L1|CDK9|HSF1|AHCYL1|NUDT21|ZC3H3|VIRMA|YTHDC1|DHX36	0
KEGG Pathway	hsa00190	Oxidative phosphorylation	-14	ATP5F1A|ATP5F1E|ATP5MC1|ATP5MC3|ATP6V0C|ATP6V0A1|ATP6AP1|ATP5PO|COX6A2|COX6B1|COX6C|COX7A1|COX7B|COX15|ATP6|COX1|COX2|COX3|CYTB|ND1|ND2|ND3|ND4|ND5|ND6|NDUFA1|NDUFA2|NDUFA3|NDUFA7|NDUFA8|NDUFA9|NDUFB4|NDUFB5|NDUFB8|NDUFC2|NDUFS4|NDUFS5|NDUFS8|PPA1|SDHA|SDHB|SDHD|UQCRC1|UQCRH|COX7A2L|COX5A|ATP5MF|COX17|TCIRG1|ATP5MG|PPA2|UQCRQ|UQCR10|NDUFA13|NDUFB11|NDUFA12|LHPP|COX6B2|ATP6V0E2|ATP6V0D2	-9.7
KEGG Pathway	hsa05012	Parkinson disease	-11	ADCY5|SLC25A4|SLC25A5|ATF4|ATP5F1A|ATP5F1E|ATP5MC1|ATP5MC3|ATP5PO|CALM1|CASP9|COX6A2|COX6B1|COX6C|COX7A1|COX7B|DUSP1|GPR37|KIF5C|MAP3K5|ATP6|COX1|COX2|COX3|CYTB|ND1|ND2|ND3|ND4|ND5|ND6|NDUFA1|NDUFA2|NDUFA3|NDUFA7|NDUFA8|NDUFA9|NDUFB4|NDUFB5|NDUFB8|NDUFC2|NDUFS4|NDUFS5|NDUFS8|NFE2L2|PRKACA|PSMB4|PSMC1|PSMC2|PSMC3|PSMC5|PSMC6|PSMD8|RPS27A|RYR3|SDHA|SDHB|SDHD|SLC6A3|TUBA4A|TXN|UBA7|UQCRC1|UQCRH|VDAC…	-7.9
KEGG Pathway	hsa04714	Thermogenesis	-11	ACTB|ACTG1|ADCY1|ADCY5|ADRB3|ATP5F1A|ATP5F1E|ATP5MC1|ATP5MC3|ATP5PO|COX6A2|COX6B1|COX6C|COX7A1|COX7B|COX15|MAPK14|ACSL4|FGFR1|MTOR|LIPE|MAP3K5|ATP6|COX1|COX2|COX3|CYTB|ND1|ND2|ND3|ND4|ND5|ND6|NDUFA1|NDUFA2|NDUFA3|NDUFA7|NDUFA8|NDUFA9|NDUFB4|NDUFB5|NDUFB8|NDUFC2|NDUFS4|NDUFS5|NDUFS8|NPR1|PRKAA1|PRKAB2|PRKACA|SDHA|SDHB|SDHD|SMARCA2|SMARCC2|UQCRC1|UQCRH|ARID1A|COX7A2L|COX5A|ATP5MF|COX17|ATP5MG|PPARG…	-7.4
KEGG Pathway	hsa05415	Diabetic cardiomyopathy	-8.5	AGT|SLC25A4|SLC25A5|ATP2A1|ATP5F1A|ATP5F1E|ATP5MC1|ATP5MC3|ATP5PO|CD36|COL3A1|COX6A2|COX6B1|COX6C|COX7A1|COX7B|MAPK14|CTSD|ACE|MTOR|G6PD|MMP2|ATP6|COX1|COX2|COX3|CYTB|ND1|ND2|ND3|ND4|ND5|ND6|NDUFA1|NDUFA2|NDUFA3|NDUFA7|NDUFA8|NDUFA9|NDUFB4|NDUFB5|NDUFB8|NDUFC2|NDUFS4|NDUFS5|NDUFS8|PDHA1|PIK3R2|PLCB3|PLN|PPP1CA|PPP1CB|PPP1CC|PRKCD|SDHA|SDHB|SDHD|SLC2A4|TGFB1|TGFBR2|UQCRC1|UQCRH|VDAC2|COX7A2L|COX5A…	-5.6
KEGG Pathway	hsa05014	Amyotrophic lateral sclerosis	-8.3	ACTB|ACTG1|ATF4|ATP5F1A|ATP5F1E|ATP5MC1|ATP5MC3|ATP5PO|CASP9|CAT|COX6A2|COX6B1|COX6C|COX7A1|COX7B|MAPK14|DNAH8|MTOR|FUS|GRIN2B|NRG1|KIF5C|MAP3K5|ATP6|COX1|COX2|COX3|CYTB|ND1|ND2|ND3|ND4|ND5|ND6|NDUFA1|NDUFA2|NDUFA3|NDUFA7|NDUFA8|NDUFA9|NDUFB4|NDUFB5|NDUFB8|NDUFC2|NDUFS4|NDUFS5|NDUFS8|PFN1|PPP3CA|PPP3R1|PSMB4|PSMC1|PSMC2|PSMC3|PSMC5|PSMC6|PSMD8|RAB1A|SDHA|SDHB|SDHD|TUBA4A|UQCRC1|UQCRH|XBP1|TUBA1A|…	-5.5
KEGG Pathway	hsa05208	Chemical carcinogenesis - reactive oxygen species	-7.7	ABL1|SLC25A4|SLC25A5|ATP5F1A|ATP5F1E|ATP5MC1|ATP5MC3|ATP5PO|CAT|CHUK|COX6A2|COX6B1|COX6C|COX7A1|COX7B|MAPK14|CYP1A1|CYP1A2|NQO1|EGF|GSTM3|HIF1A|MAP3K5|MGST2|MGST3|ATP6|COX1|COX2|COX3|CYTB|ND1|ND2|ND3|ND4|ND5|ND6|NDUFA1|NDUFA2|NDUFA3|NDUFA7|NDUFA8|NDUFA9|NDUFB4|NDUFB5|NDUFB8|NDUFC2|NDUFS4|NDUFS5|NDUFS8|NFE2L2|NFKBIA|PIK3R2|PRKCD|MAP2K1|SDHA|SDHB|SDHD|UQCRC1|UQCRH|VDAC2|COX7A2L|COX5A|GSTO1|KEAP1|UQ…	-4.9
KEGG Pathway	hsa03010	Ribosome	-7.5	RPL7|RPL9|RPL10|RPL11|RPL17|RPL18|RPL23A|RPL24|RPL27|RPL30|RPL27A|RPL28|RPL29|RPL31|RPL32|RPL35A|RPL37|RPL37A|RPL39|RPLP1|MRPL12|RPS3|RPS12|RPS13|RPS15A|RPS17|RPS19|RPS20|RPS21|RPS23|RPS24|RPS26|RPS27|RPS27A|RPS28|RPS29|RPL23|MRPL33|MRPL19|MRPL3|MRPL13|MRPL18|MRPS18C|MRPL2|MRPS2|MRPS14|MRPL14|MRPL36|MRPL11|MRPL9	-4.7
KEGG Pathway	hsa05016	Huntington disease	-7.3	AP2A1|AP2A2|SLC25A4|SLC25A5|ATP5F1A|ATP5F1E|ATP5MC1|ATP5MC3|ATP5PO|CASP9|COX6A2|COX6B1|COX6C|COX7A1|COX7B|CREBBP|DNAH8|MTOR|GRIN2B|HTT|HDAC1|KIF5C|MAP3K5|MAP3K10|ATP6|COX1|COX2|COX3|CYTB|ND1|ND2|ND3|ND4|ND5|ND6|NDUFA1|NDUFA2|NDUFA3|NDUFA7|NDUFA8|NDUFA9|NDUFB4|NDUFB5|NDUFB8|NDUFC2|NDUFS4|NDUFS5|NDUFS8|PLCB3|POLR2B|PSMB4|PSMC1|PSMC2|PSMC3|PSMC5|PSMC6|PSMD8|SDHA|SDHB|SDHD|STX1A|TGM2|TUBA4A|UQCRC1|UQ…	-4.5
KEGG Pathway	hsa05020	Prion disease	-7	SLC25A4|SLC25A5|ATF4|ATP5F1A|ATP5F1E|ATP5MC1|ATP5MC3|ATP5PO|C1QA|CACNA1F|CASP9|COX6A2|COX6B1|COX6C|COX7A1|COX7B|MAPK14|CSNK2B|EGR1|GRIN2B|KIF5C|ATP6|COX1|COX2|COX3|CYTB|ND1|ND2|ND3|ND4|ND5|ND6|NDUFA1|NDUFA2|NDUFA3|NDUFA7|NDUFA8|NDUFA9|NDUFB4|NDUFB5|NDUFB8|NDUFC2|NDUFS4|NDUFS5|NDUFS8|PIK3R2|PPP3CA|PPP3R1|PRKACA|PRKCD|PSMB4|PSMC1|PSMC2|PSMC3|PSMC5|PSMC6|PSMD8|RYR3|SDHA|SDHB|SDHD|TUBA4A|UQCRC1|UQCRH…	-4.3
KEGG Pathway	hsa05010	Alzheimer disease	-5.5	SLC25A4|SLC25A5|APOE|FAS|ATF4|ATP2A1|ATP5F1A|ATP5F1E|ATP5MC1|ATP5MC3|ATP5PO|CACNA1F|CALM1|CASP9|CHRM1|CHUK|COX6A2|COX6B1|COX6C|COX7A1|COX7B|CSNK1E|CSNK2B|DVL3|MTOR|GRIN2B|KIF5C|MAP3K5|ATP6|COX1|COX2|COX3|CYTB|ND1|ND2|ND3|ND4|ND5|ND6|NDUFA1|NDUFA2|NDUFA3|NDUFA7|NDUFA8|NDUFA9|NDUFB4|NDUFB5|NDUFB8|NDUFC2|NDUFS4|NDUFS5|NDUFS8|PIK3R2|PLCB3|PPP3CA|PPP3R1|MAP2K1|PSMB4|PSMC1|PSMC2|PSMC3|PSMC5|PSMC6|PSMD8…	-2.9
KEGG Pathway	hsa04932	Non-alcoholic fatty liver disease	-3.9	FAS|ATF4|COX6A2|COX6B1|COX6C|COX7A1|COX7B|MAPK14|LEPR|MAP3K5|COX1|COX2|COX3|CYTB|NDUFA1|NDUFA2|NDUFA3|NDUFA7|NDUFA8|NDUFA9|NDUFB4|NDUFB5|NDUFB8|NDUFC2|NDUFS4|NDUFS5|NDUFS8|PIK3R2|PRKAA1|PRKAB2|SDHA|SDHB|SDHD|TGFB1|UQCRC1|UQCRH|XBP1|COX7A2L|COX5A|UQCRQ|UQCR10|NDUFA13|NDUFB11|NDUFA12|COX6B2	-1.4
KEGG Pathway	hsa04260	Cardiac muscle contraction	-3.2	ATP1A3|ATP1B2|ATP2A1|CACNA1F|COX6A2|COX6B1|COX6C|COX7A1|COX7B|COX1|COX2|COX3|CYTB|MYH6|TNNT2|UQCRC1|UQCRH|COX7A2L|COX5A|TRDN|CACNG3|CACNG2|UQCRQ|UQCR10|CACNG7|CACNG6|CACNA2D4|COX6B2	-0.74
KEGG Pathway	hsa01200	Carbon metabolism	-3.1	ACO1|ACO2|ADH5|CAT|CS|DLAT|ESD|FBP1|G6PD|GCSH|GOT2|GPI|IDH2|MMUT|OGDH|PDHA1|PFKP|PGAM2|PGK1|PRPS1|PRPS2|RPE|SDHA|SDHB|SDHD|TKT|SUCLG1|SUCLA2|ME3|RPIA|HIBCH|HAO2|MCEE|ENO4	-0.61
KEGG Pathway	hsa00020	Citrate cycle (TCA cycle)	-2.2	ACO1|ACO2|CS|DLAT|IDH2|OGDH|PDHA1|SDHA|SDHB|SDHD|SUCLG1|SUCLA2	0
KEGG Pathway	hsa03015	mRNA surveillance pathway	-2.1	CSTF2|ETF1|FUS|MSI1|PNN|PPP1CA|PPP1CB|PPP1CC|PPP2R2C|PPP2R5A|PPP2R5B|PPP2R5D|SMG7|NUDT21|ACIN1|CSTF2T|TARDBP|PABPC1|PPP2R3B|SSU72|CPSF3|MAGOHB|PPP2R2D|UPF3A|MSI2|PABPC1L2A	0

## Sheet: Brain-only DSGs
Category	GO	Description	LogP	Hits	Log(q-value)
GO Biological Processes	GO:0007215	glutamate receptor signaling pathway	-6.8	APP|FMR1|GRIA1|GRIA2|GRIA3|GRIK1|GRIK4|GRIK5|GRIN2A|GRM1|GRM4|GRM5|GRM8|KCNB1|PLP1|PLCB1|NCSTN|GRIN3B	-2.6
GO Biological Processes	GO:0050804	modulation of chemical synaptic transmission	-6.3	ADCY8|ADORA1|APP|ARRB2|CACNA1B|CACNB4|CALB2|CDK5|DBN1|FMR1|GABBR1|GLUL|GNAI2|GRIA1|GRIA2|GRIA3|GRIK1|GRIK4|GRIK5|GRIN2A|GRM1|GRM4|GRM5|GRM8|KCNB1|KRAS|MAPT|MPP2|NFATC4|NTRK2|OPHN1|PRKAR1B|PRKCB|MAPK3|PTPRA|PTPRD|RASGRF2|CX3CL1|SLC6A6|SLC8A2|SLC8A3|SLC12A2|SNAP25|SRC|SYT1|CNTN2|CASK|MTMR2|NRXN2|SNCAIP|RIMS3|PLPPR4|SV2B|AKAP9|FLOT1|FAM107A|LZTS1|CPEB3|NTNG1|RIMS1|UNC13A|PLCB1|NCSTN|ADNP|MAPK8IP2|BA…	-2.5
GO Biological Processes	GO:0099177	regulation of trans-synaptic signaling	-6.3	ADCY8|ADORA1|APP|ARRB2|CACNA1B|CACNB4|CALB2|CDK5|DBN1|FMR1|GABBR1|GLUL|GNAI2|GRIA1|GRIA2|GRIA3|GRIK1|GRIK4|GRIK5|GRIN2A|GRM1|GRM4|GRM5|GRM8|KCNB1|KRAS|MAPT|MPP2|NFATC4|NTRK2|OPHN1|PRKAR1B|PRKCB|MAPK3|PTPRA|PTPRD|RASGRF2|CX3CL1|SLC6A6|SLC8A2|SLC8A3|SLC12A2|SNAP25|SRC|SYT1|CNTN2|CASK|MTMR2|NRXN2|SNCAIP|RIMS3|PLPPR4|SV2B|AKAP9|FLOT1|FAM107A|LZTS1|CPEB3|NTNG1|RIMS1|UNC13A|PLCB1|NCSTN|ADNP|MAPK8IP2|BA…	-2.5
GO Biological Processes	GO:0050808	synapse organization	-4.8	ANK3|APBB2|APP|ADGRB3|CACNB4|CDH9|CDH10|CDK5|CTBP2|DLG1|DRP2|EPHB3|FNTA|GABRA2|GABRG2|GRM5|L1CAM|MAPT|NEDD4|NFATC4|NRCAM|NTRK3|OPHN1|PAK3|PLXNB1|PTPRD|CX3CL1|SLC8A2|SLC8A3|CNTN2|SPARCL1|PPFIBP2|PPFIBP1|PPFIA4|MTMR2|WASF1|DNAJA3|DLG5|CPNE6|NRXN2|UNC13B|WASF3|NTNG1|PDZRN3|UNC13A|SRGAP2|ERC2|PCLO|SHANK1|ALS2|SRCIN1|SLITRK2|DNER|LRFN5|CBLN2|SHISA7	-1.2
GO Biological Processes	GO:0120039	plasma membrane bounded cell projection morphogenesis	-4.7	ADARB1|ANK3|APBB1|APP|RERE|DDR1|CDK5|CHN1|DAB1|ELAVL4|EPHA5|EPHB3|EPHB6|KIF5A|L1CAM|MAP2|MYO9B|NFATC4|NRCAM|NR4A2|OPHN1|PAK3|PLXNB1|PTCH1|PTK2|ROCK1|SGK1|SH3GL2|SNX2|SPAST|CNTN2|TBCE|TOP2B|VEGFA|PICALM|GAS7|NUMB|IQGAP1|WASF1|B4GALT6|SLIT2|MAP4K4|FEZ1|PLPPR4|ABI1|FLOT1|STK25|CHL1|KLK8|NTNG1|BTBD3|WDR47|MYCBP2|NFASC|EPB41L3|SRGAP2|MAPK8IP2|AUTS2|PACSIN1|MINK1|SHANK1|NIN|ABITRAM|ARHGEF40|ENAH|PARD3|…	-1.2
GO Biological Processes	GO:0048858	cell projection morphogenesis	-4.6	ADARB1|ANK3|APBB1|APP|RERE|DDR1|CDK5|CHN1|DAB1|ELAVL4|EPHA5|EPHB3|EPHB6|KIF5A|L1CAM|MAP2|MYO9B|NFATC4|NRCAM|NR4A2|OPHN1|PAK3|PLXNB1|PTCH1|PTK2|ROCK1|SGK1|SH3GL2|SNX2|SPAST|CNTN2|TBCE|TOP2B|VEGFA|PICALM|GAS7|NUMB|IQGAP1|WASF1|B4GALT6|SLIT2|MAP4K4|FEZ1|PLPPR4|ABI1|FLOT1|STK25|CHL1|KLK8|NTNG1|BTBD3|WDR47|MYCBP2|NFASC|EPB41L3|SRGAP2|MAPK8IP2|AUTS2|PACSIN1|MINK1|SHANK1|NIN|ABITRAM|ARHGEF40|ENAH|PARD3|…	-1.2
GO Biological Processes	GO:1990806	ligand-gated ion channel signaling pathway	-4.6	APP|GRIA1|GRIA2|GRIA3|GRIK1|GRIK4|GRIK5|GRIN2A|ITPR1|PLP1|PLCB1|GRIN3B	-1.2
GO Biological Processes	GO:0032990	cell part morphogenesis	-4.5	ADARB1|ANK3|APBB1|APP|RERE|DDR1|CDK5|CHN1|DAB1|ELAVL4|EPHA5|EPHB3|EPHB6|KIF5A|L1CAM|MAP2|MYO9B|NFATC4|NRCAM|NR4A2|OPHN1|PAK3|PLXNB1|PTCH1|PTK2|ROCK1|SGK1|SH3GL2|SNX2|SPAST|CNTN2|TBCE|TOP2B|VEGFA|PICALM|GAS7|NUMB|IQGAP1|WASF1|B4GALT6|SLIT2|MAP4K4|FEZ1|PLPPR4|ABI1|FLOT1|STK25|CHL1|KLK8|NTNG1|BTBD3|WDR47|MYCBP2|NFASC|EPB41L3|SRGAP2|MAPK8IP2|AUTS2|PACSIN1|MINK1|SHANK1|NIN|ABITRAM|ARHGEF40|ENAH|PARD3|…	-1.2
GO Biological Processes	GO:0048812	neuron projection morphogenesis	-4.4	ADARB1|ANK3|APBB1|APP|RERE|DDR1|CDK5|CHN1|DAB1|ELAVL4|EPHA5|EPHB3|EPHB6|KIF5A|L1CAM|MAP2|NFATC4|NRCAM|NR4A2|OPHN1|PAK3|PLXNB1|PTCH1|PTK2|ROCK1|SGK1|SH3GL2|SPAST|CNTN2|TBCE|TOP2B|VEGFA|PICALM|GAS7|NUMB|IQGAP1|WASF1|B4GALT6|SLIT2|MAP4K4|FEZ1|PLPPR4|ABI1|FLOT1|STK25|CHL1|KLK8|NTNG1|BTBD3|WDR47|MYCBP2|NFASC|EPB41L3|SRGAP2|MAPK8IP2|AUTS2|PACSIN1|MINK1|SHANK1|NIN|ABITRAM|ARHGEF40|ENAH|PARD3|KIDINS220|A…	-1.1
GO Biological Processes	GO:0048488	synaptic vesicle endocytosis	-4.2	AMPH|BIN1|CANX|CDK5|CTBP1|OPHN1|ITSN1|SH3GL2|SYT1|SYT5|PICALM|SYNJ1|AP3D1|DNAJC6|AP3S2|PACSIN1	-1
GO Biological Processes	GO:0035235	ionotropic glutamate receptor signaling pathway	-4.1	APP|GRIA1|GRIA2|GRIA3|GRIK1|GRIK4|GRIK5|GRIN2A|PLP1|GRIN3B	-0.95
GO Biological Processes	GO:0034330	cell junction organization	-4	ANK3|APBB2|APC|APP|ARL2|ARVCF|ADGRB3|CACNB4|CDH9|CDH10|CDK5|CTBP2|CXADR|DLG1|DRP2|EPHB3|FNTA|GABRA2|GABRG2|GRM5|KIFC3|L1CAM|MAPT|AFDN|NEDD4|NFATC4|NRCAM|NTRK3|OPHN1|PAK3|PLXNB1|PTPRD|PTPRK|CX3CL1|SLC8A2|SLC8A3|SRC|STRN|CNTN2|PIP5K1A|SPARCL1|PPFIBP2|PPFIBP1|PPFIA4|NUMB|ARHGEF7|MTMR2|WASF1|DNAJA3|DLG5|CPNE6|NRXN2|PATJ|TESK2|UNC13B|SORBS1|WASF3|NTNG1|PDZRN3|UNC13A|EPB41L3|SRGAP2|ERC2|PCLO|SHANK1|LSR…	-0.93
GO Biological Processes	GO:0140238	presynaptic endocytosis	-4	AMPH|BIN1|CANX|CDK5|CTBP1|OPHN1|ITSN1|SH3GL2|SYT1|SYT5|PICALM|SYNJ1|AP3D1|DNAJC6|AP3S2|PACSIN1	-0.93
GO Biological Processes	GO:0035249	synaptic transmission, glutamatergic	-4	CACNB4|CDK5|GRIA1|GRIA2|GRIA3|GRIK1|GRIK4|GRIK5|GRIN2A|NR3C1|UNC13B|UNC13A|ALS2|GRIN3B	-0.93
GO Biological Processes	GO:0036465	synaptic vesicle recycling	-3.9	AMPH|BIN1|CANX|CDK5|CTBP1|OPHN1|PLD2|ITSN1|SH3GL2|SYT1|SYT5|PICALM|SYNJ1|AP3D1|DNAJC6|AP3S2|PACSIN1	-0.9
GO Biological Processes	GO:1902992	negative regulation of amyloid precursor protein catabolic process	-3.9	BIN1|CLU|NTRK2|ROCK1|RTN1|RTN2|SORL1|PICALM|RTN4	-0.9
GO Biological Processes	GO:0042391	regulation of membrane potential	-3.9	ADORA1|BIN1|ANK3|APP|ARRB2|ATP1B3|BAK1|CACNB4|CAMK2D|CDK5|CHRND|CXADR|DLG1|DMD|FHL1|FMR1|GABBR1|GABRA2|GABRA6|GABRG2|GLRA2|GRIA1|GRIA3|GRIK1|GRIK4|GRIK5|GRIN2A|GRM1|GRM5|KCNB1|KCND3|KCNMA1|KCNN2|MAPT|MPP2|NEDD4|NRCAM|NTRK2|PRKAR1B|SCN1A|SLC4A3|SLC8A2|SLC8A3|SRC|VCP|SLMAP|SLC4A4|MTMR2|RIMS3|AKAP9|ZMPSTE24|UNC13B|PARK7|RIMS1|NEDD4L|MAPK8IP2|SHANK1|KCNK10|SLC25A36|PANK2|TMEM25|GRIN3B|SLC24A4|NALCN	-0.9
GO Biological Processes	GO:1903649	regulation of cytoplasmic transport	-3.8	MAP2|MAPK3|SORL1|SRC|EIPR1|SNX3|MTMR2|ATP9A|RAB21|CHMP3|DENND10	-0.88
GO Biological Processes	GO:0050890	cognition	-3.8	ADCY8|ADORA1|AMFR|APP|ADGRB3|CAMK4|CASP3|CDK5|ELAVL4|AFF2|GRIA1|GRIN2A|GRM5|KRAS|MAPT|NFATC4|NTRK2|OPRL1|PRKAR1B|SCN2A|SGK1|ST3GAL4|SLC8A2|SLC8A3|SNAP25|SRC|CNTN2|THRA|PICALM|SYNJ1|NRXN2|ATP8A1|CHL1|FAM107A|KLK8|CPEB3|PLCB1|DDHD2|NCSTN|ADNP|MAPK8IP2|SLC24A2|ZNF385A|SHANK1|KCNK10|CHD7|PAK5|NDRG4|IFT20|ATXN1L|SHISA7	-0.88
GO Biological Processes	GO:1902430	negative regulation of amyloid-beta formation	-3.7	BIN1|CLU|NTRK2|ROCK1|RTN1|RTN2|SORL1|RTN4	-0.77
GO Biological Processes	GO:0007611	learning or memory	-3.6	ADCY8|AMFR|APP|ADGRB3|CAMK4|CASP3|CDK5|ELAVL4|AFF2|GRIA1|GRIN2A|GRM5|KRAS|MAPT|NFATC4|NTRK2|OPRL1|PRKAR1B|SCN2A|SGK1|SLC8A2|SLC8A3|SNAP25|SRC|CNTN2|THRA|PICALM|SYNJ1|NRXN2|ATP8A1|KLK8|CPEB3|PLCB1|DDHD2|NCSTN|ADNP|MAPK8IP2|SLC24A2|ZNF385A|SHANK1|KCNK10|PAK5|NDRG4|IFT20|ATXN1L|SHISA7	-0.77
GO Biological Processes	GO:0051480	regulation of cytosolic calcium ion concentration	-3.6	ADCY8|ADORA1|ATP2B1|ATP2B4|CACNB4|CALB2|CDK5|GRIA1|GRM1|GRM5|ITPR1|SLC8A2|TRPC4|TSPOAP1|SV2B|ERC2	-0.72
GO Biological Processes	GO:0002098	tRNA wobble uridine modification	-3.5	ELP1|ELP5|ELP3|TRMT9B|GTPBP3|CTU1|CTU2	-0.65
GO Biological Processes	GO:0099509	regulation of presynaptic cytosolic calcium ion concentration	-3.5	ADORA1|CACNB4|CALB2|CDK5|TSPOAP1|SV2B|ERC2	-0.65
GO Biological Processes	GO:0050684	regulation of mRNA processing	-3.4	DHX9|DYRK1A|FMR1|SFSWAP|SUPT6H|RBM10|QKI|RBM39|SAFB2|KHDRBS3|CELF1|SRSF10|PAPOLA|PUF60|CPEB3|RBFOX2|DAZAP1|RBM11|RBFOX1|PCBP4|CELF5|CPEB1|RBM15|PTCD2|SLTM|RBM24	-0.62
GO Biological Processes	GO:0051056	regulation of small GTPase mediated signal transduction	-3.3	CHN1|DOCK3|EPS8|KRAS|MYO9B|OPHN1|PPP2CB|PSD|RGL2|RAP1GAP|RASGRF2|ITSN1|SIPA1|SRC|TIAM1|LZTR1|STK19|CYTH3|SLIT2|MAP4K4|ARHGEF10|FLOT1|STAMBP|ARHGAP26|RAP1GAP2|MCF2L|ARHGEF12|SRGAP2|KANK2|AUTS2|TIAM2|RABGEF1|CYRIB|RASIP1|ARHGEF10L|ARHGEF40|ARFGAP1|CDC42SE2|RALGAPB|ALS2|DENND1A|MAPKAP1|GARNL3|CGNL1|ARHGAP12|RASGEF1A|MMD2|RALGAPA1|SCAI	-0.56
GO Biological Processes	GO:0099536	synaptic signaling	-3.3	ADARB1|ADORA1|AMPH|ARRB2|CACNA1B|CACNB4|CDK5|CHRND|CTBP2|DLG1|DLG2|DMD|DRP2|DTNA|GABBR1|GABRA2|GABRA6|GABRG2|GLRA2|GNAI2|GRIA1|GRIA2|GRIA3|GRIK1|GRIK4|GRIK5|GRIN2A|NR3C1|GRM1|GRM4|GRM5|HTR4|ITPR1|KIF5A|MBP|MPP2|NTRK2|PLP1|PRKCB|PTPRD|SNAP25|SYT1|SYT5|TAC1|CADPS|LIN7A|SYNJ1|NRXN2|RIMS3|SV2B|AKAP9|UNC13B|PARK7|RIMS1|UNC13A|PLCB1|MAPK8IP2|ERC2|BLOC1S6|PCLO|MINK1|PDZD11|ALS2|GRIN3B|CBLN2	-0.56
GO Biological Processes	GO:0007528	neuromuscular junction development	-3.3	ANK3|APP|CACNB4|FNTA|NEDD4|PPFIBP2|PPFIBP1|DNAJA3|UNC13B|PDZRN3|UNC13A|ALS2	-0.5
GO Biological Processes	GO:0099504	synaptic vesicle cycle	-3.2	AMPH|BIN1|ATP6V1B2|CANX|CDK5|CTBP1|CTBP2|OPHN1|PLD2|ITSN1|SH3GL2|SNAP25|SYT1|SYT5|PICALM|CADPS|SYNJ1|AP3D1|RIMS3|DNAJC6|AP3S2|UNC13B|RIMS1|UNC13A|ERC2|BLOC1S6|PCLO|PACSIN1	-0.5
GO Biological Processes	GO:0070936	protein K48-linked ubiquitination	-3.2	AMFR|TTC3|UBE2D3|UBE2E2|UBE2G1|UBE2H|CUL1|BTRC|NEDD4L|UBE2T|RNF216|RNF126|FBXO38|RNF146|SYVN1|UBE2Q2	-0.49
GO Biological Processes	GO:0045197	establishment or maintenance of epithelial cell apical/basal polarity	-3.1	DLG1|DLG2|FAT1|ILK|OPHN1|LIN7A|DLG5|PATJ|MTCL1|PDZD11|ERBIN|PARD3|IFT20	-0.38
GO Biological Processes	GO:2000765	regulation of cytoplasmic translation	-3	DHX9|FMR1|HNRNPD|CNBP|PAIP1|CPEB3|ZNF385A|CPEB1|RBM24	-0.35
GO Biological Processes	GO:0021955	central nervous system neuron axonogenesis	-3	ADARB1|EPHB3|EPHB6|NR4A2|B4GALT6|SLIT2|WDR47|MYCBP2|NIN|SPTBN4|TCTN1	-0.35
GO Biological Processes	GO:0008344	adult locomotory behavior	-2.9	APP|ARRB2|CACNB4|DAB1|EPS8|NR4A2|PBX3|SCN1A|CNTN2|TBCE|ZMPSTE24|CHL1|PARK7|WDR47|OXR1|CHD7|SPTBN4	-0.25
GO Biological Processes	GO:0080120	CAAX-box protein maturation	-2.9	RAP1GDS1|RCE1|ZMPSTE24	-0.25
GO Biological Processes	GO:1990481	mRNA pseudouridine synthesis	-2.8	TRUB2|PUS7|PUS7L|PUS3|RPUSD4	-0.25
GO Biological Processes	GO:0002097	tRNA wobble base modification	-2.8	ELP1|ELP5|ELP3|TRMT9B|GTPBP3|CTU1|CTU2	-0.25
GO Biological Processes	GO:0048791	calcium ion-regulated exocytosis of neurotransmitter	-2.8	SNAP25|SYT1|SYT5|RIMS3|UNC13B|RIMS1|UNC13A	-0.25
GO Biological Processes	GO:0048167	regulation of synaptic plasticity	-2.8	ADCY8|ADORA1|APP|CALB2|CDK5|DBN1|FMR1|GRIA1|GRIN2A|GRM5|KCNB1|KRAS|MAPT|MPP2|NFATC4|NTRK2|PRKAR1B|RASGRF2|CX3CL1|SLC8A2|SLC8A3|SNAP25|CNTN2|RIMS3|FAM107A|LZTS1|CPEB3|RIMS1|NCSTN|SLC24A2|ERC2|MCTP1|SHISA7	-0.24
GO Biological Processes	GO:0061245	establishment or maintenance of bipolar cell polarity	-2.8	DLG1|DLG2|FAT1|ILK|OPHN1|LIN7A|DLG5|PATJ|MTCL1|PDZD11|ERBIN|PARD3|IFT20	-0.24
GO Biological Processes	GO:0035088	establishment or maintenance of apical/basal cell polarity	-2.8	DLG1|DLG2|FAT1|ILK|OPHN1|LIN7A|DLG5|PATJ|MTCL1|PDZD11|ERBIN|PARD3|IFT20	-0.24
GO Biological Processes	GO:0099003	vesicle-mediated transport in synapse	-2.8	AMPH|BIN1|ATP6V1B2|CANX|CDK5|CTBP1|CTBP2|OPHN1|PLD2|ITSN1|SH3GL2|SNAP25|SYT1|SYT5|PICALM|CADPS|SYNJ1|AP3D1|RIMS3|DNAJC6|AP3S2|UNC13B|RIMS1|UNC13A|ERC2|BLOC1S6|PCLO|PACSIN1	-0.24
GO Biological Processes	GO:0021952	central nervous system projection neuron axonogenesis	-2.7	ADARB1|EPHB3|EPHB6|NR4A2|SLIT2|WDR47|MYCBP2|NIN|SPTBN4	-0.24
GO Biological Processes	GO:0099643	signal release from synapse	-2.7	CDK5|CTBP2|GRM4|SNAP25|SYT1|SYT5|CADPS|LIN7A|SYNJ1|NRXN2|RIMS3|UNC13B|RIMS1|UNC13A|ERC2|BLOC1S6|PCLO|PDZD11	-0.24
GO Biological Processes	GO:0007269	neurotransmitter secretion	-2.7	CDK5|CTBP2|GRM4|SNAP25|SYT1|SYT5|CADPS|LIN7A|SYNJ1|NRXN2|RIMS3|UNC13B|RIMS1|UNC13A|ERC2|BLOC1S6|PCLO|PDZD11	-0.24
GO Biological Processes	GO:0048813	dendrite morphogenesis	-2.7	RERE|CDK5|ELAVL4|EPHB3|MAP2|NFATC4|PAK3|PICALM|ABI1|BTBD3|MAPK8IP2|MINK1|SHANK1|ABITRAM|KIDINS220	-0.24
GO Biological Processes	GO:0000209	protein polyubiquitination	-2.7	AMFR|ERCC8|MDM2|NEDD4|TPP2|TTC3|UBE2D3|UBE2E2|UBE2G1|UBE2H|UBE2V2|CUL1|BTRC|TRIP12|DZIP3|RNF41|TRIM3|RBCK1|FBXW11|NEDD4L|MKRN1|ARIH1|UBE2T|ANAPC5|RNF216|MARCHF1|UBE2W|RNF126|TNKS2|FBXO38|RNF146|SHARPIN|SYVN1|DCAF15|TMEM129|UBE2Q2	-0.24
GO Biological Processes	GO:0060304	regulation of phosphatidylinositol dephosphorylation	-2.7	MTMR1|MTMR3|MTMR2|MTMR4	-0.24
GO Biological Processes	GO:1902991	regulation of amyloid precursor protein catabolic process	-2.7	BIN1|CASP3|CLU|FKBP1A|NTRK2|ROCK1|RTN1|RTN2|SORL1|PICALM|RTN4	-0.21
GO Biological Processes	GO:0031111	negative regulation of microtubule polymerization or depolymerization	-2.7	APC|DYRK1A|MAP2|ATXN7|ARHGEF7|APC2|WDR47|INPP5J|NAV3|BMERB1|TTBK2	-0.21
GO Biological Processes	GO:1902003	regulation of amyloid-beta formation	-2.6	BIN1|CASP3|CLU|NTRK2|ROCK1|RTN1|RTN2|SORL1|PICALM|RTN4	-0.19
GO Biological Processes	GO:0046839	phospholipid dephosphorylation	-2.6	MTMR1|INPP4B|SYNJ1|MTMR3|MTMR2|INPP5J|PLPPR1|PLPPR3|PIP4P1|PLPPR5	-0.19
GO Biological Processes	GO:0007628	adult walking behavior	-2.6	ARRB2|CACNB4|DAB1|SCN1A|CNTN2|ZMPSTE24|OXR1|CHD7|SPTBN4	-0.19
GO Biological Processes	GO:1903311	regulation of mRNA metabolic process	-2.6	DHX9|DYRK1A|ELAVL4|FMR1|HNRNPAB|HNRNPC|HNRNPD|CNOT2|ROCK1|SFSWAP|SUPT6H|RBM10|QKI|RBM39|SAFB2|PAN2|RIDA|PAIP1|KHDRBS3|CELF1|SRSF10|PAPOLA|PUF60|CPEB3|EXOSC7|PUM2|RBFOX2|DAZAP1|LSM1|RBM11|RBFOX1|PCBP4|METTL14|CELF5|CPEB1|RBM15|FTO|PTCD2|SLTM|PRR5L|TIRAP|RBM24|YTHDF3	-0.19
GO Biological Processes	GO:0070050	neuron cellular homeostasis	-2.6	ADORA1|APP|ATP6V1B2|CACNB4|CALB2|CDK5|CX3CL1|SLC8A2|TSPOAP1|SV2B|IMMT|SLC24A2|ERC2|TSC22D4	-0.17
GO Biological Processes	GO:1900452	regulation of long-term synaptic depression	-2.6	ADCY8|ADORA1|FMR1|KCNB1|MAPT	-0.17
GO Biological Processes	GO:2000278	regulation of DNA biosynthetic process	-2.6	ARRB2|ATR|HNRNPC|HNRNPD|PAK3|MAPK3|RFC3|SRC|TFDP1|XRCC5|GINS1|CCT8|SMG6|JADE2|SH2B1|CHTF8|WRAP53|MEAF6|ACD|STN1|TNKS2|MAPK15	-0.17
GO Biological Processes	GO:0006874	cellular calcium ion homeostasis	-2.6	ADCY8|ADORA1|ANXA6|APP|ATP2B1|ATP2B4|BAK1|CACNB4|CALB2|CAMK2D|CDK5|GRIA1|GRM1|GRM5|ITPR1|PRKCB|RAP1GDS1|SLC8A2|SLC8A3|TPT1|TRPC4|TSPOAP1|SV2B|MICU1|IMMT|SLC24A2|ERC2|RMDN3|SLC24A4|TPCN2|MICU3	-0.17
GO Biological Processes	GO:0060078	regulation of postsynaptic membrane potential	-2.6	ADORA1|ARRB2|CDK5|CHRND|GABBR1|GABRA2|GABRA6|GABRG2|GLRA2|GRIA1|GRIA3|GRIK1|GRIK4|GRIK5|GRIN2A|GRM1|GRM5|MPP2|MAPK8IP2	-0.17
GO Biological Processes	GO:0043484	regulation of RNA splicing	-2.5	CLK1|CLK2|DYRK1A|FMR1|AFF2|HNRNPH3|ATXN7|SFSWAP|RBM10|TRRAP|QKI|RBM39|SUPT7L|KHDRBS3|CELF1|SRSF10|PUF60|RBFOX2|DAZAP1|ZNF638|RBM11|RBFOX1|SUPT20H|CCNL1|PCBP4|PTBP2|CELF5|RBM15|RBM24|ILDR2	-0.14
GO Biological Processes	GO:2000641	regulation of early endosome to late endosome transport	-2.5	MAPK3|SRC|SNX3|MTMR2|RAB21|CHMP3|DENND10	-0.13
GO Biological Processes	GO:0016079	synaptic vesicle exocytosis	-2.5	CDK5|CTBP2|SNAP25|SYT1|SYT5|CADPS|SYNJ1|RIMS3|UNC13B|RIMS1|UNC13A|ERC2|BLOC1S6|PCLO	-0.13
GO Biological Processes	GO:0048259	regulation of receptor-mediated endocytosis	-2.5	ARRB2|CD63|CLU|FMR1|HFE|OPHN1|VEGFA|PICALM|NUMB|SYNJ1|MTMR2|DNAJC6|TNK2|FLOT1|RAB21|RABGEF1|SGIP1|ANKRD13B|GSG1L|ANKRD13D	-0.1
GO Biological Processes	GO:0070198	protein localization to chromosome, telomeric region	-2.4	ATR|ATRX|XRCC5|ACD|TNKS2|ZNF827	-0.089
GO Biological Processes	GO:0018105	peptidyl-serine phosphorylation	-2.4	ATR|BAK1|CAMK4|CAMK2D|CDK5|CLK1|DYRK1A|ILK|MARK3|NTRK2|PRKACB|PRKCB|ROCK1|SGK1|SRC|TGFBR1|MAP3K12|CAMK1|MKNK1|RIPK1|DYRK4|AKT3|TLK2|MAST3|CAMK1G|TTBK2|DCLK2|RICTOR|STK32C|MAST4	-0.089
GO Biological Processes	GO:0034249	negative regulation of amide metabolic process	-2.4	BIN1|CLU|DAPK1|DAPK3|EIF4G1|FMR1|HNRNPD|ILF3|CNOT2|NTRK2|ROCK1|RTN1|RTN2|SORL1|PAN2|RIDA|TRIM3|CELF1|CPEB3|EXOSC7|AGO1|LSM1|PUS7|RTN4|METTL14|CPEB1|CAPRIN2|FTO|RBM24|YTHDF3	-0.089
GO Biological Processes	GO:0098870	action potential propagation	-2.4	CACNB4|NRCAM|NTRK2|SCN1A	-0.089
GO Biological Processes	GO:1990504	dense core granule exocytosis	-2.4	SNAP25|CADPS|UNC13B|UNC13A	-0.089
GO Biological Processes	GO:2000766	negative regulation of cytoplasmic translation	-2.4	FMR1|CPEB3|CPEB1|RBM24	-0.089
GO Biological Processes	GO:0002863	positive regulation of inflammatory response to antigenic stimulus	-2.4	CD81|FCGR1A|KARS1|PARK7	-0.089
GO Biological Processes	GO:0019227	neuronal action potential propagation	-2.4	CACNB4|NRCAM|NTRK2|SCN1A	-0.089
GO Biological Processes	GO:0072673	lamellipodium morphogenesis	-2.4	MYO9B|SNX2|WASF1|ABI1	-0.089
GO Biological Processes	GO:0090659	walking behavior	-2.4	ARRB2|CACNB4|DAB1|SCN1A|CNTN2|ZMPSTE24|OXR1|CHD7|SPTBN4	-0.089
GO Biological Processes	GO:0097503	sialylation	-2.4	ST3GAL1|ST3GAL4|ST3GAL3|ST3GAL5|ST8SIA5|ST6GALNAC6|ST8SIA3	-0.085
GO Biological Processes	GO:1904353	regulation of telomere capping	-2.4	HNRNPD|NBN|MAPK3|XRCC1|SMG6|TNKS2|MAPK15	-0.085
GO Biological Processes	GO:0016081	synaptic vesicle docking	-2.4	CTBP2|SNAP25|UNC13B|UNC13A|BLOC1S6	-0.085
GO Biological Processes	GO:0099566	regulation of postsynaptic cytosolic calcium ion concentration	-2.4	GRIA1|GRM1|GRM5|ITPR1|SLC8A2	-0.085
GO Biological Processes	GO:0050806	positive regulation of synaptic transmission	-2.3	ADCY8|ADORA1|APP|ARRB2|FMR1|GLUL|GRIN2A|MPP2|NFATC4|NTRK2|PRKAR1B|RASGRF2|SLC8A2|SLC8A3|SNAP25|SYT1|RIMS3|FLOT1|RIMS1|SLC24A2|ZDHHC3|NALCN|SHISA7	-0.055
GO Biological Processes	GO:0002943	tRNA dihydrouridine synthesis	-2.3	DUS2|DUS3L|DUS1L	-0.055
GO Biological Processes	GO:0009957	epidermal cell fate specification	-2.3	RBPJ|PTCH1|PTCH2	-0.055
GO Biological Processes	GO:1903995	regulation of non-membrane spanning protein tyrosine kinase activity	-2.3	DOCK3|SRC|DUSP22	-0.055
GO Biological Processes	GO:0042726	flavin-containing compound metabolic process	-2.3	VCP|RFK|FLAD1	-0.055
GO Biological Processes	GO:1903546	protein localization to photoreceptor outer segment	-2.3	TUB|ZDHHC3|SPATA7	-0.055
GO Biological Processes	GO:0048013	ephrin receptor signaling pathway	-2.3	CHN1|EPHA5|EPHB3|EPHB6|NTRK3|PAK3|PTK2|SRC|SS18|TIAM1|ARHGEF7|EPHA10	-0.049
GO Biological Processes	GO:0030100	regulation of endocytosis	-2.3	BIN1|ARRB2|CD63|CLU|FMR1|HFE|OPHN1|ROCK1|SRC|VEGFA|PICALM|NUMB|VAMP4|SYNJ1|MTMR2|DNAJC6|TNK2|FLOT1|RAB31|RAB21|NEDD4L|RABGEF1|PACSIN3|PACSIN1|SYNJ2BP|RUFY2|ARFGAP1|MCTP1|SGIP1|ANKRD13B|GSG1L|ANKRD13D	-0.046
GO Biological Processes	GO:1903358	regulation of Golgi organization	-2.3	MAPK3|PDE4DIP|USP6NL|AKAP9|STX18|RBSN	-0.046
GO Biological Processes	GO:0001574	ganglioside biosynthetic process	-2.3	ST3GAL1|ST3GAL3|ST3GAL5|B4GALT6|ST6GALNAC6|ST8SIA3	-0.046
GO Biological Processes	GO:0043393	regulation of protein binding	-2.3	AMFR|APP|ARRB2|CDK5|FKBP1A|GAS8|HFE|MAP2|MARK3|NFATC4|PEX14|PPP2CB|MAPK3|ROCK1|SMARCD3|SORL1|SRC|TGFBR1|TIAM1|CAMK1|HDAC4|HDAC5|FLOT1|PARK7|KDM1A|ADNP|PRMT7|PRMT8|CAPRIN2|PSME3IP1|TTBK2	-0.046
GO Biological Processes	GO:0007214	gamma-aminobutyric acid signaling pathway	-2.3	CACNB4|GABBR1|GABRA2|GABRA6|GABRG2|GNAI2|SLC12A2|SHISA7	-0.046
GO Biological Processes	GO:0099558	maintenance of synapse structure	-2.3	ADGRB3|CTBP2|DLG1|OPHN1|ERC2|PCLO|SHANK1|CBLN2	-0.046
GO Biological Processes	GO:0006892	post-Golgi vesicle-mediated transport	-2.3	ANK3|MYO1B|SORL1|AP3D1|RABEP1|SCAMP1|ARFRP1|AP3S2|RAB31|DOP1A|MON2|RAB26|CCDC93|AP1AR|EXOC1|RBSN|PHAF1|OSBPL5	-0.046
GO Biological Processes	GO:0009451	RNA modification	-2.3	ADARB1|HNRNPAB|TARBP1|ELP1|EMG1|ZC3H13|ELP5|TRUB2|TRMO|PUS7|TRIT1|DUS2|ELP3|DUS3L|TRMT9B|METTL14|DUS1L|RBM15|FTO|QTRT1|PUS7L|PUS3|GTPBP3|RPUSD4|CTU1|CTU2	-0.046
GO Biological Processes	GO:0042551	neuron maturation	-2.2	APP|ADGRB3|KCNB1|NRCAM|NR4A2|CX3CL1|CNTN2|B4GALT6|KDM1A|SPTBN4	-0.044
GO Biological Processes	GO:0021954	central nervous system neuron development	-2.2	ADARB1|CDK5|EPHB3|EPHB6|MAP2|MAPT|NTRK2|NR4A2|CNTN2|B4GALT6|SLIT2|WDR47|MYCBP2|NIN|SPTBN4|TCTN1|DCLK2	-0.029
GO Biological Processes	GO:0030866	cortical actin cytoskeleton organization	-2.2	CDK5|DLG1|EPB41L2|PLS1|ROCK1|AKAP11|EPB41L3|ANLN|FHOD3|FMNL2	0
GO Biological Processes	GO:0099505	regulation of presynaptic membrane potential	-2.1	GABBR1|GABRA2|GRIA1|GRIA3|GRIK4|GRIK5|SCN1A|GRIN3B	0
GO Biological Processes	GO:2000781	positive regulation of double-strand break repair	-2.1	RBBP8|DPF2|SMARCD3|UBE2V2|DPF1|TRRAP|RUVBL1|MAD2L2|BRD8|EPC2|KMT5B|PIAS4|WRAP53|DMAP1|MEAF6|KMT5C	0
GO Biological Processes	GO:0007172	signal complex assembly	-2.1	PTK2|PXN|SRC|MAPK8IP2	0
GO Biological Processes	GO:1990416	cellular response to brain-derived neurotrophic factor stimulus	-2.1	MAPT|NTRK2|SH3GL2|WASF1	0
GO Biological Processes	GO:0099560	synaptic membrane adhesion	-2.1	CDH9|CDH10|PTPRD|SPARCL1|NTNG1|SLITRK2|LRFN5	0
GO Biological Processes	GO:0046856	phosphatidylinositol dephosphorylation	-2.1	MTMR1|INPP4B|SYNJ1|MTMR3|MTMR2|INPP5J|PIP4P1	0
GO Biological Processes	GO:0009226	nucleotide-sugar biosynthetic process	-2.1	GMDS|PGM3|UGDH|GMPPB|AMDHD2|NANS	0
GO Biological Processes	GO:0030970	retrograde protein transport, ER to cytosol	-2.1	UFD1|VCP|HM13|RHBDD1|SYVN1|TMEM129	0
GO Biological Processes	GO:1903513	endoplasmic reticulum to cytosol transport	-2.1	UFD1|VCP|HM13|RHBDD1|SYVN1|TMEM129	0
GO Biological Processes	GO:0048024	regulation of mRNA splicing, via spliceosome	-2.1	DYRK1A|FMR1|SFSWAP|RBM10|QKI|RBM39|KHDRBS3|CELF1|SRSF10|PUF60|RBFOX2|DAZAP1|RBM11|RBFOX1|PCBP4|CELF5|RBM15|RBM24	0
GO Biological Processes	GO:0031644	regulation of nervous system process	-2.1	ADORA1|APP|FMR1|GRIN2A|GRM1|MAG|OPRL1|PRKAR1B|SLC8A2|SLC8A3|SRC|MTMR2|NRXN2|AKAP9|UNC13B|WASF3|KLK8|MGLL|RIMS1|SHANK1|PARD3|BEGAIN|JAM2|TMEM25|SHISA7	0
GO Biological Processes	GO:0018209	peptidyl-serine modification	-2.1	ATR|BAK1|CAMK4|CAMK2D|CDK5|CLK1|DYRK1A|ILK|MARK3|NTRK2|PRKACB|PRKCB|ROCK1|SGK1|SRC|TGFBR1|MAP3K12|CAMK1|MKNK1|RIPK1|DYRK4|AKT3|TLK2|MAST3|SPOCK3|CAMK1G|TTBK2|DCLK2|RICTOR|STK32C|MAST4	0
GO Biological Processes	GO:0033135	regulation of peptidyl-serine phosphorylation	-2.1	APP|ARRB2|ATP2B4|BAK1|DMD|EIF4G1|NTRK2|NTRK3|VEGFA|CAMK1|SH2D3A|AKAP9|TENM1|MAD2L2|PARK7|INPP5J|SPTBN4|CAPRIN2|MAPKAP1|RICTOR	0
GO Biological Processes	GO:0008088	axo-dendritic transport	-2.1	APP|DLG2|KIF5A|MAPT|OPA1|SPAST|WASF1|AP3D1|AP3S2|TRAK1|RAB21|MAPK8IP3|FBXW11|BLOC1S6|RABGEF1	0
GO Biological Processes	GO:0006836	neurotransmitter transport	-2	CDK5|CTBP2|GABRA2|GRM4|SLC6A6|SLC6A7|SNAP25|SYT1|SYT5|CADPS|LIN7A|SYNJ1|NRXN2|RIMS3|SV2B|UNC13B|PARK7|RIMS1|UNC13A|ERC2|BLOC1S6|PCLO|PDZD11	0
GO Biological Processes	GO:0007612	learning	-2	APP|ADGRB3|CDK5|ELAVL4|GRIN2A|GRM5|KRAS|NTRK2|OPRL1|SLC8A2|SLC8A3|SNAP25|CNTN2|SYNJ1|NRXN2|ATP8A1|PLCB1|DDHD2|MAPK8IP2|SLC24A2|SHANK1|PAK5|NDRG4|IFT20|ATXN1L	0
GO Biological Processes	GO:0006400	tRNA modification	-2	TARBP1|ELP1|ELP5|TRMO|PUS7|TRIT1|DUS2|ELP3|DUS3L|TRMT9B|DUS1L|QTRT1|PUS3|GTPBP3|RPUSD4|CTU1|CTU2	0
GO Biological Processes	GO:0030534	adult behavior	-2	APP|ARRB2|CACNB4|CDK5|CRHR1|DAB1|EPS8|GABRG2|NR4A2|PBX3|SCN1A|CNTN2|TBCE|NRXN2|ZMPSTE24|CHL1|PARK7|WDR47|NCSTN|SHANK1|OXR1|CHD7|SPTBN4	0
GO Biological Processes	GO:0044065	regulation of respiratory system process	-2	ADORA1|PBX3|MTG2|FTO|MTG1	0
KEGG Pathway	hsa04724	Glutamatergic synapse	-3.2	ADCY8|GLUL|GNAI2|GRIA1|GRIA2|GRIA3|GRIK1|GRIK4|GRIK5|GRIN2A|GRM1|GRM4|GRM5|GRM8|ITPR1|PLCB4|PLD2|PRKACB|PRKCB|MAPK3|PLCB1|SHANK1|GRIN3B	-0.48
KEGG Pathway	hsa04144	Endocytosis	-3.1	AMPH|BIN1|ARRB2|GRK4|GRK5|KIF5A|SMAD2|MDM2|NEDD4|PLD2|PSD|RAB5C|SH3GL2|SNX2|SRC|TGFBR1|PIP5K1A|SNX3|RABEP1|CYTH3|DNAJC6|WASHC5|RNF41|ARPC1A|STAMBP|RAB31|NEDD4L|ACAP2|SH3KBP1|WASHC3|CHMP3|RUFY2|ARFGAP1|PARD3|SH3GLB2|ACTR3B|RBSN|MVB12B|ACAP3|WIPF3	-0.4
KEGG Pathway	hsa04720	Long-term potentiation	-2.8	ADCY8|CAMK4|CAMK2D|GRIA1|GRIA2|GRIN2A|GRM1|GRM5|ITPR1|KRAS|PLCB4|PRKACB|PRKCB|MAPK3|PLCB1	-0.24
KEGG Pathway	hsa04730	Long-term depression	-2.7	CRHR1|GNAI2|GRIA1|GRIA2|GRIA3|GRM1|ITPR1|KRAS|PLCB4|PPP2CB|PPP2R1B|PRKCB|MAPK3|PLCB1	-0.2
KEGG Pathway	hsa04360	Axon guidance	-2.5	CAMK2D|CDK5|EPHA5|EPHB3|EPHB6|GNAI2|ILK|KRAS|L1CAM|ABLIM1|NFATC4|PAK3|PLXNB1|MAPK3|PTCH1|PTK2|RGS3|ROCK1|SRC|TRPC4|SLIT2|NTNG1|ABLIM3|ARHGEF12|SRGAP2|SSH3|ENAH|PARD3|PAK5|SEMA6D|UNC5D	-0.089
KEGG Pathway	hsa04728	Dopaminergic synapse	-2.4	BMAL1|ARRB2|CACNA1B|CAMK2D|GNAI2|GRIA1|GRIA2|GRIA3|GRIN2A|ITPR1|KCNJ6|KIF5A|PLCB4|PPP2CB|PPP2R1B|PPP2R3A|PPP2R5C|PRKACB|PRKCB|MAPK10|SCN1A|AKT3|PLCB1	-0.085
KEGG Pathway	hsa04919	Thyroid hormone signaling pathway	-2.1	ATP1B3|DIO2|KRAS|MDM2|PFKL|PFKM|PLCB4|MED1|PRKACB|PRKCB|MAPK3|RHEB|SRC|THRA|NCOA3|HDAC3|MED14|TBC1D4|MED12|MED13|AKT3|PLCB1	0
KEGG Pathway	hsa04120	Ubiquitin mediated proteolysis	-2.1	XIAP|ERCC8|MDM2|NEDD4|UBA52|UBA1|UBE2D3|UBE2E2|UBE2G1|UBE2H|CUL1|HERC1|BTRC|PIAS2|TRIP12|RHOBTB2|FBXW11|NEDD4L|ANAPC5|PIAS4|FANCL|UBE2W|SYVN1|UBE2Q2	0
KEGG Pathway	hsa05131	Shigellosis	-2.1	ACTN4|ILK|ITPR1|MDM2|PLCB4|MAPK3|MAPK10|PTK2|PXN|ROCK1|RPS6KB2|SRC|UBA52|UBE2D3|UBE2V2|CUL1|RIPK1|WASF1|BTRC|CYTH3|AKT3|CALCOCO2|ARPC1A|RBCK1|SEPTIN9|FNBP1|PLCB1|FBXW11|FNBP1L|SEPTIN3|ACTR3B|ELMO2|SHARPIN	0

## Sheet: Brain-overlapped DEGs and DSGs
Category	GO	Description	LogP	Hits	Log(q-value)
GO Biological Processes	GO:0043484	regulation of RNA splicing	-5.8	HNRNPA1|HNRNPA2B1|HNRNPH1|HNRNPK|MBNL1|SRSF5|SNRNP70|SRPK2|TAF9|KAT2B|WTAP|PQBP1|RBM12|MBNL2|DDX17|CELF2|RNPS1|FASTK|TRA2A|CELF4|CLK4|CCNL2|HNRNPLL|RBFOX3	-2
GO Biological Processes	GO:0061024	membrane organization	-5.8	ABCA3|AKT2|ANK2|RHOA|CAMK2A|AP2M1|AP3S1|DCTN1|DLG4|DNM1|DVL1|GSK3B|PAFAH1B1|PLEC|SGTA|SNCA|STX3|STXBP1|REEP5|BAG6|PIP4K2B|STX16|SYT7|NRXN1|PITPNM1|ELMO1|C2CD2L|OSBPL2|SNAP91|DNM1L|TFG|ABCA7|YKT6|SIRT2|SCAP|EXOC6B|SUN1|PIP5K1C|ATP13A2|TRAM1|SEC31B|KCNIP2|REEP2|TRAPPC4|NLGN3|ATG2B|CCDC88A|EXOC2|PARP11|GRAMD1B|TRAPPC11|PALS1|TMEM175|SHANK3|MYADM|MTSS2|OSBPL8|SPACA6|ATP11C|MTX3|MYO18A	-2
GO Biological Processes	GO:0071625	vocalization behavior	-5.7	BRINP1|DLG4|NRXN3|NRXN1|NLGN3|MYH14|SHANK3	-2
GO Biological Processes	GO:0099536	synaptic signaling	-5.6	ACHE|APBA1|DAGLA|DAG1|DLG4|DVL1|GABRA3|GNB1|GRID1|GRIN1|GRM7|GSK3B|KCNN1|LY6H|PAFAH1B1|SEPTIN5|PRKCG|PTPRN2|PTPRS|SLC1A2|SLC6A9|SNCA|STX3|STXBP1|VDAC1|PPFIA3|CACNA1G|SYT7|DLGAP1|NRXN1|GABBR2|RIMS2|RPH3A|CRTC1|PIP5K1C|KCNIP2|NLGN3|CELF4|SLC17A7|LYNX1|SEZ6|SHISA6	-2
GO Biological Processes	GO:0050804	modulation of chemical synaptic transmission	-5.2	ACHE|APBA1|CAMK2A|CAMK2B|DLG4|DNM1|DVL1|EPHB1|FYN|GRID1|GRIN1|GRM7|GSK3B|MAP1A|NRGN|PAFAH1B1|SEPTIN5|PPP3CB|PRKCG|PRKCZ|PTPRS|SLC6A9|SNCA|STX3|STXBP1|PPFIA3|SYT7|DLGAP1|NRXN1|PREPL|RIMS2|CYP46A1|DLGAP4|NCDN|CRTC1|NSMF|NLGN3|CELF4|SNX14|SLC4A10|TMEM108|ATAD1|SHANK3|SHISA6	-1.8
GO Biological Processes	GO:0099177	regulation of trans-synaptic signaling	-5.2	ACHE|APBA1|CAMK2A|CAMK2B|DLG4|DNM1|DVL1|EPHB1|FYN|GRID1|GRIN1|GRM7|GSK3B|MAP1A|NRGN|PAFAH1B1|SEPTIN5|PPP3CB|PRKCG|PRKCZ|PTPRS|SLC6A9|SNCA|STX3|STXBP1|PPFIA3|SYT7|DLGAP1|NRXN1|PREPL|RIMS2|CYP46A1|DLGAP4|NCDN|CRTC1|NSMF|NLGN3|CELF4|SNX14|SLC4A10|TMEM108|ATAD1|SHANK3|SHISA6	-1.8
GO Biological Processes	GO:0099537	trans-synaptic signaling	-5.1	ACHE|APBA1|DAGLA|DAG1|DLG4|DVL1|GABRA3|GRID1|GRIN1|GRM7|GSK3B|KCNN1|PAFAH1B1|SEPTIN5|PRKCG|PTPRN2|PTPRS|SLC1A2|SLC6A9|SNCA|STX3|STXBP1|VDAC1|PPFIA3|CACNA1G|SYT7|DLGAP1|NRXN1|GABBR2|RIMS2|RPH3A|PIP5K1C|KCNIP2|NLGN3|CELF4|SLC17A7|LYNX1|SEZ6|SHISA6	-1.7
GO Biological Processes	GO:0051703	biological process involved in intraspecies interaction between organisms	-4.8	BRINP1|DLG4|DVL1|GRID1|SEPTIN5|NRXN3|NRXN1|CIC|VPS13A|NLGN3|SHANK3	-1.5
GO Biological Processes	GO:0035176	social behavior	-4.8	BRINP1|DLG4|DVL1|GRID1|SEPTIN5|NRXN3|NRXN1|CIC|VPS13A|NLGN3|SHANK3	-1.5
GO Biological Processes	GO:0048167	regulation of synaptic plasticity	-4.6	CAMK2A|CAMK2B|DLG4|GRIN1|GSK3B|MAP1A|NRGN|PPP3CB|PRKCG|PRKCZ|SNCA|STX3|STXBP1|PPFIA3|SYT7|RIMS2|CYP46A1|NCDN|CRTC1|NSMF|SLC4A10|SHANK3|SHISA6	-1.4
GO Biological Processes	GO:0098916	anterograde trans-synaptic signaling	-4.4	ACHE|APBA1|DLG4|DVL1|GABRA3|GRID1|GRIN1|GRM7|GSK3B|KCNN1|PAFAH1B1|SEPTIN5|PRKCG|PTPRN2|SLC1A2|SLC6A9|SNCA|STX3|STXBP1|VDAC1|PPFIA3|CACNA1G|SYT7|DLGAP1|NRXN1|GABBR2|RIMS2|RPH3A|PIP5K1C|KCNIP2|NLGN3|CELF4|SLC17A7|LYNX1|SEZ6|SHISA6	-1.3
GO Biological Processes	GO:0007268	chemical synaptic transmission	-4.4	ACHE|APBA1|DLG4|DVL1|GABRA3|GRID1|GRIN1|GRM7|GSK3B|KCNN1|PAFAH1B1|SEPTIN5|PRKCG|PTPRN2|SLC1A2|SLC6A9|SNCA|STX3|STXBP1|VDAC1|PPFIA3|CACNA1G|SYT7|DLGAP1|NRXN1|GABBR2|RIMS2|RPH3A|PIP5K1C|KCNIP2|NLGN3|CELF4|SLC17A7|LYNX1|SEZ6|SHISA6	-1.3
GO Biological Processes	GO:0048168	regulation of neuronal synaptic plasticity	-4.4	CAMK2A|CAMK2B|DLG4|GRIN1|SNCA|PPFIA3|NCDN|NSMF|SLC4A10|SHANK3|SHISA6	-1.3
GO Biological Processes	GO:0098815	modulation of excitatory postsynaptic potential	-4.3	DLG4|DVL1|GRIN1|PRKCZ|NRXN1|RIMS2|NLGN3|CELF4|TMEM108|SHANK3	-1.2
GO Biological Processes	GO:0050890	cognition	-4.2	BRINP1|DLG4|FYN|GRIN1|MAP1A|MEIS2|NRGN|PAFAH1B1|PPP3CB|PRKCG|PRKCZ|ABCC8|VDAC1|TUSC3|NRXN3|NRXN1|PJA2|DGCR2|ABCA7|ARL6IP5|EHMT2|CIC|CRTC1|NLGN3|GPRASP3|PPP1R1B|PPP1R9B|ATAD1|SHANK3|GPR155	-1.2
GO Biological Processes	GO:0007610	behavior	-4.1	APBA1|ASTN1|BRINP1|DCTN1|DLG4|DVL1|ETV1|FYN|GRID1|GRIN1|MAP1A|MEIS2|NRGN|PAFAH1B1|SEPTIN5|PPP3CB|PRKCG|PRKCZ|SLC1A2|SNCA|ABCC8|TMOD1|VDAC1|MTA1|NRXN3|NRXN1|PJA2|ABCA7|ARL6IP5|EHMT2|CIC|VPS13A|CRTC1|HTRA2|HIPK2|NLGN3|ANKH|SLC4A10|MYH14|GPRASP3|PPP1R1B|KIRREL3|PPP1R9B|ATAD1|SHANK3|SEZ6|TMEM18	-1.1
GO Biological Processes	GO:0099003	vesicle-mediated transport in synapse	-4	ATP6V1C1|AP2M1|AP3S1|DNM1|SEPTIN5|SNCA|STX3|STXBP1|PPFIA3|SYT7|RIMS2|SNAP91|RPH3A|PIP5K1C|CALY|ATP6V1D|ATP6V1H|NLGN3|SLC17A7	-1.1
GO Biological Processes	GO:0043666	regulation of phosphoprotein phosphatase activity	-4	GSK3B|PTPA|PPP1R11|PPP6R2|PPP6R1|VRK3|SLC39A10|PPP4R4|PPP1R1B|PPP1R9B	-1.1
GO Biological Processes	GO:0050773	regulation of dendrite development	-4	RHOA|CAMK2B|CUX1|DLG4|GSK3B|PAFAH1B1|STK11|PQBP1|CRTC1|NSMF|SS18L1|GPRASP3|RTN4IP1|KNDC1|SEZ6	-1.1
GO Biological Processes	GO:0007611	learning or memory	-4	BRINP1|DLG4|FYN|GRIN1|MAP1A|MEIS2|NRGN|PAFAH1B1|PPP3CB|PRKCG|PRKCZ|ABCC8|VDAC1|NRXN3|NRXN1|PJA2|ABCA7|ARL6IP5|EHMT2|CIC|CRTC1|NLGN3|GPRASP3|PPP1R1B|PPP1R9B|ATAD1|SHANK3	-1.1
GO Biological Processes	GO:0035304	regulation of protein dephosphorylation	-4	GSK3B|PTPA|PPP1R11|PPP6R2|PPP6R1|CAMTA1|NSMF|VRK3|SLC39A10|PPP4R4|PPP1R1B|PPP1R9B|CNEP1R1	-1.1
GO Biological Processes	GO:2000463	positive regulation of excitatory postsynaptic potential	-4	DLG4|DVL1|GRIN1|PRKCZ|NRXN1|RIMS2|NLGN3|SHANK3	-1.1
GO Biological Processes	GO:0099504	synaptic vesicle cycle	-3.9	ATP6V1C1|AP2M1|AP3S1|DNM1|SEPTIN5|SNCA|STX3|STXBP1|PPFIA3|SYT7|RIMS2|SNAP91|RPH3A|PIP5K1C|ATP6V1D|ATP6V1H|NLGN3|SLC17A7	-1.1
GO Biological Processes	GO:0106027	neuron projection organization	-3.8	CTNND2|DCTN1|DLG4|DVL1|EPHB1|FYN|GSK3B|MAP1A|SHANK3	-0.97
GO Biological Processes	GO:0042177	negative regulation of protein catabolic process	-3.8	FYN|MAP1A|PRKCG|SGTA|SNCA|SNRNP70|TAF9|TIMP4|BAG6|OGT|PSMF1|SIRT2|ATP13A2|WAC|MARCHF7	-0.97
GO Biological Processes	GO:0007612	learning	-3.7	DLG4|FYN|GRIN1|MAP1A|MEIS2|NRGN|PPP3CB|ABCC8|VDAC1|NRXN3|NRXN1|ABCA7|CIC|NLGN3|PPP1R1B|PPP1R9B|ATAD1|SHANK3	-0.95
GO Biological Processes	GO:0048814	regulation of dendrite morphogenesis	-3.6	CAMK2B|CUX1|DLG4|GSK3B|PAFAH1B1|STK11|PQBP1|NSMF|SS18L1|GPRASP3|KNDC1	-0.88
GO Biological Processes	GO:0060996	dendritic spine development	-3.5	CAMK2A|CTNND2|DLG4|DVL1|EPHB1|IQSEC1|SHANK3	-0.81
GO Biological Processes	GO:1901799	negative regulation of proteasomal protein catabolic process	-3.5	MAP1A|PRKCG|SGTA|TAF9|BAG6|OGT|PSMF1|WAC|MARCHF7	-0.77
GO Biological Processes	GO:0032990	cell part morphogenesis	-3.5	APLP1|RHOA|CTNNA2|CTNND2|DAG1|DLG4|DVL1|EPHB1|ETV1|FGFR2|FYN|GPM6A|MAP1A|NCAM1|NEO1|NFIB|PAFAH1B1|PLEC|PPP3CB|PRKCZ|STK11|STXBP1|UBB|LMO4|NRXN3|NRXN1|DNM1L|PLXNC1|NCKAP1|CYFIP2|NLGN3|MAP1S|DSCAML1|ZNF335|TMEM108|MYH14|TRIM46|KIRREL3|SHANK3|UNC5A	-0.77
GO Biological Processes	GO:0032989	cellular component morphogenesis	-3.4	ACTN2|ANK2|APLP1|RHOA|CTNNA2|CTNND2|DAG1|DLG4|DVL1|EPHB1|ETV1|FGFR2|FYN|GPM6A|MAP1A|NCAM1|NEO1|NFIB|PAFAH1B1|PLEC|PPP3CB|PRKCZ|STK11|STXBP1|TMOD1|UBB|LMO4|NRXN3|NRXN1|DNM1L|PLXNC1|NCKAP1|ZPBP|CYFIP2|NLGN3|MAP1S|DSCAML1|ZNF335|PALS1|TMEM108|MYH14|TRIM46|KIRREL3|SHANK3|UNC5A	-0.72
GO Biological Processes	GO:0031175	neuron projection development	-3.4	APLP1|RHOA|CAMK2A|CTNNA2|CTNND2|DAG1|DLG4|DVL1|MARK2|EPHB1|ETV1|FGFR2|FYN|GFRA1|GPM6A|GRM7|GSK3B|MAP1A|NCAM1|NEO1|NFIB|PAFAH1B1|PPP3CB|PRKCZ|STK11|STX3|STXBP1|UBB|LMO4|NRXN3|NRXN1|IQSEC1|PQBP1|PLXNC1|NCKAP1|NCDN|SS18L1|CYFIP2|TRAPPC4|NLGN3|MAP1S|DSCAML1|ZNF335|TMEM108|TRIM46|KIRREL3|PPP1R9B|SHANK3|UNC5A	-0.71
GO Biological Processes	GO:0007158	neuron cell-cell adhesion	-3.4	ASTN1|NRXN3|NRXN1|ASTN2|NLGN3	-0.71
GO Biological Processes	GO:0032515	negative regulation of phosphoprotein phosphatase activity	-3.3	GSK3B|PTPA|PPP1R11|PPP4R4|PPP1R1B|PPP1R9B	-0.7
GO Biological Processes	GO:0007269	neurotransmitter secretion	-3.3	DVL1|SEPTIN5|PTPRN2|SNCA|STX3|STXBP1|PPFIA3|SYT7|NRXN1|RIMS2|RPH3A|PIP5K1C	-0.69
GO Biological Processes	GO:0099643	signal release from synapse	-3.3	DVL1|SEPTIN5|PTPRN2|SNCA|STX3|STXBP1|PPFIA3|SYT7|NRXN1|RIMS2|RPH3A|PIP5K1C	-0.69
GO Biological Processes	GO:0016358	dendrite development	-3.2	CAMK2A|CTNNA2|CTNND2|DLG4|DVL1|EPHB1|FYN|MAP1A|IQSEC1|SS18L1|TRAPPC4|MAP1S|PPP1R9B|SHANK3	-0.6
GO Biological Processes	GO:1903044	protein localization to membrane raft	-3.2	FLOT2|CYP46A1|REEP2|MYADM	-0.6
GO Biological Processes	GO:1903051	negative regulation of proteolysis involved in protein catabolic process	-3.2	MAP1A|PRKCG|SGTA|TAF9|BAG6|OGT|PSMF1|HIPK2|WAC|MARCHF7	-0.6
GO Biological Processes	GO:0048812	neuron projection morphogenesis	-3.1	APLP1|RHOA|CTNNA2|CTNND2|DAG1|DLG4|DVL1|EPHB1|ETV1|FGFR2|FYN|GPM6A|MAP1A|NCAM1|NEO1|NFIB|PAFAH1B1|PPP3CB|PRKCZ|STK11|STXBP1|UBB|LMO4|NRXN3|NRXN1|PLXNC1|NCKAP1|CYFIP2|NLGN3|MAP1S|DSCAML1|ZNF335|TMEM108|TRIM46|KIRREL3|SHANK3|UNC5A	-0.54
GO Biological Processes	GO:0120039	plasma membrane bounded cell projection morphogenesis	-3	APLP1|RHOA|CTNNA2|CTNND2|DAG1|DLG4|DVL1|EPHB1|ETV1|FGFR2|FYN|GPM6A|MAP1A|NCAM1|NEO1|NFIB|PAFAH1B1|PPP3CB|PRKCZ|STK11|STXBP1|UBB|LMO4|NRXN3|NRXN1|PLXNC1|NCKAP1|CYFIP2|NLGN3|MAP1S|DSCAML1|ZNF335|TMEM108|TRIM46|KIRREL3|SHANK3|UNC5A	-0.46
GO Biological Processes	GO:1903421	regulation of synaptic vesicle recycling	-3	AP2M1|PPP3CB|SNCA|SYT7|PLAA|SLC17A7	-0.45
GO Biological Processes	GO:1990778	protein localization to cell periphery	-3	ACTN2|AKT2|ANK2|ARL3|DLG4|DPP6|FLOT2|JUP|PRKCZ|STX3|STXBP1|PREPL|ARL6IP5|CCDC88A|GPR158|WDR19|RAB40C|PALS1|PPP1R9B|SYS1|MYADM|TTC7B	-0.43
GO Biological Processes	GO:0032886	regulation of microtubule-based process	-3	RHOA|CLTC|DCTN1|MARK2|GSK3B|MAP1A|PAFAH1B1|SNCA|STK11|KAT2B|TUBB4A|MAPRE2|CLASP1|CLIP3|CALY|MAP1S|ATAT1|TRIM46|CCNL2|DIXDC1|TMEM67|CENATAC	-0.42
GO Biological Processes	GO:0048858	cell projection morphogenesis	-2.9	APLP1|RHOA|CTNNA2|CTNND2|DAG1|DLG4|DVL1|EPHB1|ETV1|FGFR2|FYN|GPM6A|MAP1A|NCAM1|NEO1|NFIB|PAFAH1B1|PPP3CB|PRKCZ|STK11|STXBP1|UBB|LMO4|NRXN3|NRXN1|PLXNC1|NCKAP1|CYFIP2|NLGN3|MAP1S|DSCAML1|ZNF335|TMEM108|TRIM46|KIRREL3|SHANK3|UNC5A	-0.42
GO Biological Processes	GO:0016050	vesicle organization	-2.9	ATP6V1C1|ATP6V0B|AP2M1|AP3S1|DLG4|DNM1|EPS15|PAFAH1B1|SNCA|STX3|STXBP1|PIP4K2B|STX16|SYT7|ZFYVE16|SNAP91|TFG|ZPBP|SCAP|ATP13A2|SEC31B|ATP6V1D|TRAPPC4|ATP6V1H|TRAPPC11|TMEM175|ZDHHC20|MYO18A	-0.42
GO Biological Processes	GO:0008380	RNA splicing	-2.9	HNRNPA1|HNRNPA2B1|HNRNPH1|HNRNPK|MBNL1|SRSF5|SNRNP70|SNRPN|SRPK2|DDX39B|ZRSR2|PRPF18|PRPF4B|SRSF11|WTAP|PQBP1|SUGP2|MBNL2|DDX17|CELF2|TXNL4A|RNPS1|TRA2A|LUC7L3|LUC7L|CELF4|C2orf49|PPP1R9B|RBFOX3	-0.42
GO Biological Processes	GO:0000398	mRNA splicing, via spliceosome	-2.9	HNRNPA1|HNRNPA2B1|HNRNPH1|HNRNPK|SRSF5|SNRNP70|SNRPN|SRPK2|DDX39B|ZRSR2|PRPF18|PRPF4B|PQBP1|DDX17|CELF2|TXNL4A|RNPS1|TRA2A|LUC7L3|LUC7L|CELF4	-0.42
GO Biological Processes	GO:0000377	RNA splicing, via transesterification reactions with bulged adenosine as nucleophile	-2.9	HNRNPA1|HNRNPA2B1|HNRNPH1|HNRNPK|SRSF5|SNRNP70|SNRPN|SRPK2|DDX39B|ZRSR2|PRPF18|PRPF4B|PQBP1|DDX17|CELF2|TXNL4A|RNPS1|TRA2A|LUC7L3|LUC7L|CELF4	-0.42
GO Biological Processes	GO:0016188	synaptic vesicle maturation	-2.9	ATP6V1C1|DLG4|STXBP1|ATP6V1D|ATP6V1H|ZDHHC20	-0.42
GO Biological Processes	GO:0006397	mRNA processing	-2.9	APLP1|HNRNPA1|HNRNPA2B1|HNRNPH1|HNRNPK|MBNL1|SRSF5|SNRNP70|SNRPN|SRPK2|DDX39B|PABPN1|ZRSR2|PRPF18|PRPF4B|SRSF11|WTAP|PQBP1|SUGP2|MBNL2|DDX17|CELF2|TXNL4A|RNPS1|CPSF6|TRA2A|LUC7L3|LUC7L|CELF4|RBM26|HNRNPLL|RBFOX3|PAN3	-0.41
GO Biological Processes	GO:0006836	neurotransmitter transport	-2.8	DVL1|SEPTIN5|PTPRN2|SLC1A2|SLC6A9|SNCA|STX3|STXBP1|PPFIA3|SYT7|NRXN1|RIMS2|RPH3A|PIP5K1C|SLC17A7	-0.38
GO Biological Processes	GO:0016071	mRNA metabolic process	-2.8	APLP1|HNRNPA1|HNRNPA2B1|HNRNPH1|HNRNPK|MBNL1|MLH1|SRSF5|SKIC2|SNRNP70|SNRPN|SRPK2|TAF9|DDX39B|PABPN1|ZRSR2|PRPF18|NCOA1|PRPF4B|SRSF11|WTAP|PQBP1|SUGP2|MBNL2|DDX17|CELF2|TXNL4A|RNPS1|CPSF6|EDC4|TRA2A|POLR1H|LUC7L3|SAMD4B|LUC7L|CELF4|RBM26|PYM1|HNRNPLL|RBFOX3|PATL1|PAN3	-0.38
GO Biological Processes	GO:0050803	regulation of synapse structure or activity	-2.8	RHOA|KIF1A|CAMK2B|CTNNA2|DAG1|DCTN1|DVL1|EPHB1|FYN|GPM6A|GRID1|PAFAH1B1|PTPRS|SNCA|OGT|NRXN1|PLXNC1|ADGRL1|NLGN3|SLC17A7|GPRASP3|SHANK3	-0.37
GO Biological Processes	GO:0030521	androgen receptor signaling pathway	-2.8	RHOA|PLPP1|DDX17|RWDD1|ZMIZ1	-0.37
GO Biological Processes	GO:0060997	dendritic spine morphogenesis	-2.8	CTNND2|DLG4|DVL1|EPHB1|SHANK3	-0.37
GO Biological Processes	GO:0000375	RNA splicing, via transesterification reactions	-2.8	HNRNPA1|HNRNPA2B1|HNRNPH1|HNRNPK|SRSF5|SNRNP70|SNRPN|SRPK2|DDX39B|ZRSR2|PRPF18|PRPF4B|PQBP1|DDX17|CELF2|TXNL4A|RNPS1|TRA2A|LUC7L3|LUC7L|CELF4	-0.37
GO Biological Processes	GO:0048024	regulation of mRNA splicing, via spliceosome	-2.8	HNRNPA1|HNRNPA2B1|HNRNPK|SNRNP70|SRPK2|WTAP|DDX17|CELF2|RNPS1|TRA2A|CELF4|RBFOX3	-0.37
GO Biological Processes	GO:1905475	regulation of protein localization to membrane	-2.7	AKT2|AP2M1|CLTC|DAG1|DLG4|FYN|GDI1|HPCA|LRP1|PRKCZ|STX3|OGT|PPFIA1|CLIP3|MIEF1|PPP1R9B|SHISA6	-0.33
GO Biological Processes	GO:0010256	endomembrane system organization	-2.7	AKT2|ANK2|ATP6V0B|AP3S1|DCTN1|DNM1|GOLGA2|PAFAH1B1|PLEC|SGTA|STX3|REEP5|BAG6|SYT7|OSBPL2|RTN3|ABCA7|ZPBP|RAB18|SIRT2|PLEKHM2|CLASP1|SUN1|TRAM1|SEC31B|REEP2|ATP6V1D|ATP6V1H|PARP11|ARHGAP21|TRAPPC11|PALS1|MTSS2|REEP6|SPACA6|RETREG3|MYO18A	-0.31
GO Biological Processes	GO:0010921	regulation of phosphatase activity	-2.7	GSK3B|PTPA|PPP1R11|PPP6R2|PPP6R1|VRK3|SLC39A10|PPP4R4|PPP1R1B|PPP1R9B	-0.3
GO Biological Processes	GO:0016079	synaptic vesicle exocytosis	-2.7	SEPTIN5|SNCA|STX3|STXBP1|PPFIA3|SYT7|RIMS2|RPH3A|PIP5K1C	-0.3
GO Biological Processes	GO:0030100	regulation of endocytosis	-2.7	AP2M1|DLG4|HNRNPK|HPCA|LRP1|PPP3CB|ATXN2|SNCA|TFR2|TSC2|SYT7|ZFYVE16|SNAP91|ABCA7|CLIP3|CALY|VAC14|SLC17A7|ATAD1	-0.29
GO Biological Processes	GO:0071314	cellular response to cocaine	-2.6	SLC1A2|EHMT2|PPP1R1B	-0.27
GO Biological Processes	GO:0050807	regulation of synapse organization	-2.6	RHOA|KIF1A|CAMK2B|CTNNA2|DAG1|DCTN1|DVL1|EPHB1|FYN|GPM6A|GRID1|PAFAH1B1|PTPRS|SNCA|OGT|NRXN1|PLXNC1|ADGRL1|NLGN3|GPRASP3|SHANK3	-0.25
GO Biological Processes	GO:0010970	transport along microtubule	-2.6	APBA1|ARL3|KIF1A|AP3S1|FLOT2|MAP1A|PAFAH1B1|PRKCZ|UBB|SUN1|CLIP3|CALY|MAP1S|ARHGAP21|WDR19|TMEM108|TRIM46	-0.24
GO Biological Processes	GO:0071684	organism emergence from protective structure	-2.6	PPP4R4|NECAB1|PHF6|PLPP4|ZBED6	-0.24
GO Biological Processes	GO:0035188	hatching	-2.6	PPP4R4|NECAB1|PHF6|PLPP4|ZBED6	-0.24
GO Biological Processes	GO:0001835	blastocyst hatching	-2.6	PPP4R4|NECAB1|PHF6|PLPP4|ZBED6	-0.24
GO Biological Processes	GO:0051650	establishment of vesicle localization	-2.6	KIF1A|AP3S1|DCTN1|DNM1|PAFAH1B1|SEPTIN5|PRKCZ|SNCA|SNAP91|TFG|YKT6|EXOC6B|CLASP1|TRAPPC4|EXOC2|TRAPPC11|TRIM46	-0.23
GO Biological Processes	GO:0010923	negative regulation of phosphatase activity	-2.6	GSK3B|PTPA|PPP1R11|PPP4R4|PPP1R1B|PPP1R9B	-0.23
GO Biological Processes	GO:0035308	negative regulation of protein dephosphorylation	-2.6	GSK3B|PTPA|PPP1R11|PPP4R4|PPP1R1B|PPP1R9B	-0.23
GO Biological Processes	GO:0006900	vesicle budding from membrane	-2.6	AP2M1|AP3S1|DNM1|SNAP91|TFG|SCAP|SEC31B|TRAPPC4|TRAPPC11|MYO18A	-0.23
GO Biological Processes	GO:0051668	localization within membrane	-2.5	ACTN2|AKT2|ANK2|ARL3|DLG4|DPP6|DVL1|EPS15|FLOT2|JUP|PRKCZ|SGTA|STX3|STXBP1|BAG6|STX16|NRXN1|PREPL|VPS26C|ARL6IP5|CYP46A1|EXOC6B|TRAM1|REEP2|VPS50|CCDC88A|EXOC2|GPR158|WDR19|RAB40C|PALS1|ATAD1|SHANK3|SYS1|MYADM|TTC7B|ZDHHC20|SHISA6	-0.22
GO Biological Processes	GO:2001259	positive regulation of cation channel activity	-2.4	ACTN2|ANK2|CACNA2D1|PPP3CB|STIM1|ABCC8|KCNIP2|ATPSCKMT	-0.15
GO Biological Processes	GO:0031644	regulation of nervous system process	-2.4	DAG1|DLG4|DVL1|GRIN1|PRKCZ|DLGAP1|NRXN1|RIMS2|DLGAP4|NLGN3|CELF4|TMEM108|SHANK3|ATPSCKMT|SHISA6	-0.15
GO Biological Processes	GO:0035303	regulation of dephosphorylation	-2.4	GSK3B|PTPA|PPP1R11|PPP6R2|PPP6R1|CAMTA1|NSMF|VRK3|SLC39A10|PPP4R4|PPP1R1B|PPP1R9B|CNEP1R1	-0.15
GO Biological Processes	GO:0051823	regulation of synapse structural plasticity	-2.4	CAMK2B|CTNNA2|SHANK3	-0.15
GO Biological Processes	GO:0097061	dendritic spine organization	-2.4	CTNND2|DLG4|DVL1|EPHB1|FYN|SHANK3	-0.13
GO Biological Processes	GO:0140029	exocytic process	-2.4	SEPTIN5|SNCA|STX3|STXBP1|PPFIA3|YKT6|RPH3A|EXOC6B|EXOC2	-0.13
GO Biological Processes	GO:0030534	adult behavior	-2.4	PAFAH1B1|SEPTIN5|SLC1A2|SNCA|TMOD1|NRXN3|NRXN1|EHMT2|HTRA2|HIPK2|NLGN3|PPP1R1B|SHANK3|SEZ6	-0.13
GO Biological Processes	GO:0006644	phospholipid metabolic process	-2.3	ABCA3|FADS1|PAFAH1B1|PIGF|SNCA|PIP4K2B|PLPP1|DPM2|PLAA|GGPS1|PCYT1B|PITPNM1|PIP5K1C|SLC44A1|PIGT|VAC14|SERINC1|PLPPR2|MPPE1|GPAT3|OSBPL8|PIGU|TTC7B|PLPP4|LPCAT4|SERINC5	-0.074
GO Biological Processes	GO:0071826	ribonucleoprotein complex subunit organization	-2.3	KLC1|RPL38|SRSF5|SRPK2|TAF9|DDX39B|ZRSR2|PRPF18|DENR|EIF3C|CELF2|TXNL4A|CPSF6|BOP1|LUC7L3|NLE1|LUC7L|CELF4	-0.074
GO Biological Processes	GO:0070507	regulation of microtubule cytoskeleton organization	-2.3	RHOA|CLTC|DCTN1|MARK2|GSK3B|MAP1A|PAFAH1B1|SNCA|TUBB4A|MAPRE2|CLASP1|CLIP3|MAP1S|ATAT1|DIXDC1	-0.067
GO Biological Processes	GO:0051648	vesicle localization	-2.3	KIF1A|AP3S1|DCTN1|DNM1|PAFAH1B1|SEPTIN5|PRKCZ|SNCA|SNAP91|TFG|YKT6|EXOC6B|CLASP1|TRAPPC4|EXOC2|TRAPPC11|TRIM46	-0.045
GO Biological Processes	GO:0060538	skeletal muscle organ development	-2.3	RHOA|CCNT2|DAG1|FLNB|MEF2D|PLEC|PPP3CB|RYR1|LARGE1|ZBTB18|VRK3|MYH14|BCL9L	-0.045
GO Biological Processes	GO:0048268	clathrin coat assembly	-2.3	CLTC|EPS15|SNAP91|CALY	-0.045
GO Biological Processes	GO:0071786	endoplasmic reticulum tubular network organization	-2.3	RTN3|RAB18|REEP2|RETREG3	-0.045
GO Biological Processes	GO:0032287	peripheral nervous system myelin maintenance	-2.2	AKT2|PLEC|PALS1	-0.045
GO Biological Processes	GO:0016185	synaptic vesicle budding from presynaptic endocytic zone membrane	-2.2	AP3S1|DNM1|SNAP91	-0.045
GO Biological Processes	GO:1904714	regulation of chaperone-mediated autophagy	-2.2	SNCA|SNRNP70|ATP13A2	-0.045
GO Biological Processes	GO:0070142	synaptic vesicle budding	-2.2	AP3S1|DNM1|SNAP91	-0.045
GO Biological Processes	GO:0099601	regulation of neurotransmitter receptor activity	-2.2	DLG4|SLC6A9|DLGAP1|DLGAP4|NLGN3|LYNX1|SHANK3|SHISA6	-0.045
GO Biological Processes	GO:0050684	regulation of mRNA processing	-2.2	HNRNPA1|HNRNPA2B1|HNRNPK|SNRNP70|SRPK2|WTAP|DDX17|CELF2|RNPS1|CPSF6|TRA2A|CELF4|RBFOX3	-0.045
GO Biological Processes	GO:0001505	regulation of neurotransmitter levels	-2.2	ACHE|DAGLA|CAMK2A|DVL1|SEPTIN5|PRKCG|PTPRN2|SLC1A2|SNCA|STX3|STXBP1|PPFIA3|SYT7|NRXN1|PREPL|RIMS2|RPH3A|PIP5K1C	-0.045
GO Biological Processes	GO:0061136	regulation of proteasomal protein catabolic process	-2.2	DVL1|GSK3B|MAP1A|PRKCG|SGTA|SUMO2|TAF9|UBB|BAG6|OGT|PSMF1|ZER1|GLMN|SIRT2|WAC|MARCHF7|TMEM259	-0.045
GO Biological Processes	GO:0000245	spliceosomal complex assembly	-2.2	SRSF5|SRPK2|DDX39B|ZRSR2|CELF2|TXNL4A|LUC7L3|LUC7L|CELF4	-0.044
GO Biological Processes	GO:0032414	positive regulation of ion transmembrane transporter activity	-2.2	ACTN2|ANK2|CACNA2D1|PPP3CB|STIM1|ABCC8|KCNIP2|NLGN3|WNK2|SHANK3|ATPSCKMT	-0.044
GO Biological Processes	GO:0050806	positive regulation of synaptic transmission	-2.2	DLG4|GRIN1|NRGN|PRKCG|PRKCZ|SNCA|STX3|STXBP1|NRXN1|RIMS2|CRTC1|NLGN3|SHANK3	-0.044
GO Biological Processes	GO:0050775	positive regulation of dendrite morphogenesis	-2.2	CAMK2B|CUX1|DLG4|PAFAH1B1|SS18L1|GPRASP3	-0.044
GO Biological Processes	GO:0032435	negative regulation of proteasomal ubiquitin-dependent protein catabolic process	-2.2	MAP1A|SGTA|TAF9|BAG6|OGT|WAC	-0.044
GO Biological Processes	GO:0022618	ribonucleoprotein complex assembly	-2.1	RPL38|SRSF5|SRPK2|TAF9|DDX39B|ZRSR2|PRPF18|DENR|EIF3C|CELF2|TXNL4A|CPSF6|BOP1|LUC7L3|NLE1|LUC7L|CELF4	0
GO Biological Processes	GO:0001941	postsynaptic membrane organization	-2.1	DLG4|DVL1|NRXN1|NLGN3|SHANK3	0
GO Biological Processes	GO:0034315	regulation of Arp2/3 complex-mediated actin nucleation	-2.1	CTNNA2|GMFG|NCKAP1|ARFIP2|CARMIL1	0
GO Biological Processes	GO:0051640	organelle localization	-2.1	KIF1A|AP3S1|DCTN1|DNM1|MARK2|MLH1|PAFAH1B1|SEPTIN5|PRKCZ|PTGDS|SNCA|STK11|STX3|STXBP1|UBB|PPFIA3|STX16|SPAG9|SNAP91|DNM1L|TFG|YKT6|PLEKHM2|EXOC6B|CLASP1|SUN1|RMDN1|TRAPPC4|MAP1S|MFN1|EXOC2|ARHGAP21|TRAPPC11|KLC2|TRIM46|MISP	0
GO Biological Processes	GO:1903829	positive regulation of protein localization	-2.1	ACHE|AKT2|DLG4|DVL1|FYN|GSK3B|HPCA|JUP|LRP1|MAP1A|PPP3CB|PRKCZ|STK11|STX3|ABCC8|TCF7L2|C2CD2L|SAE1|DNM1L|HUWE1|APBB3|ABCA7|CORO2B|ATP13A2|MYRIP|CLIP3|HTRA2|MIEF1|CCDC88A|LRRC8A|PPP1R9B|MYO18A	0
GO Biological Processes	GO:2000059	negative regulation of ubiquitin-dependent protein catabolic process	-2.1	MAP1A|SGTA|TAF9|BAG6|OGT|HIPK2|WAC	0
GO Biological Processes	GO:0099111	microtubule-based transport	-2.1	APBA1|ARL3|KIF1A|AP3S1|FLOT2|MAP1A|PAFAH1B1|PRKCZ|UBB|SUN1|DPCD|CLIP3|CALY|MAP1S|ARHGAP21|WDR19|TMEM108|TRIM46	0
GO Biological Processes	GO:0007029	endoplasmic reticulum organization	-2.1	SGTA|REEP5|BAG6|RTN3|RAB18|TRAM1|SEC31B|REEP2|REEP6|RETREG3	0
GO Biological Processes	GO:0036465	synaptic vesicle recycling	-2.1	AP2M1|AP3S1|DNM1|SNCA|SYT7|SNAP91|PIP5K1C|NLGN3	0
GO Biological Processes	GO:0008088	axo-dendritic transport	-2.1	APBA1|KIF1A|AP3S1|FLOT2|MAP1A|PAFAH1B1|CALY|TMEM108|TRIM46	0
GO Biological Processes	GO:0097484	dendrite extension	-2.1	STK11|CYFIP2|TMEM108	0
GO Biological Processes	GO:0090129	positive regulation of synapse maturation	-2.1	CAMK2B|NRXN1|ADGRL1	0
GO Biological Processes	GO:0010770	positive regulation of cell morphogenesis involved in differentiation	-2.1	CAMK2B|CUX1|DLG4|PAFAH1B1|SS18L1|GPRASP3	0
GO Biological Processes	GO:0120009	intermembrane lipid transfer	-2.1	ABCA3|PITPNM1|C2CD2L|OSBPL2|ATG2B|GRAMD1B|OSBPL8	0
GO Biological Processes	GO:0034330	cell junction organization	-2.1	ACHE|ACTN2|ANK2|RHOA|CTNND2|DCTN1|DLG4|DVL1|EPHB1|FYN|GPM6A|JUP|PLEC|PTPRS|SNCA|PPFIA1|PKP4|PPFIA3|NRXN1|CORO2B|ADGRL3|PIP5K1C|SDF4|NLGN3|PCDHGC4|TMEM108|OCEL1|ARHGAP39|CCM2|KIRREL3|IGSF21|SHANK3|SEZ6|HIPK1|AJM1	0
GO Biological Processes	GO:1900242	regulation of synaptic vesicle endocytosis	-2	AP2M1|PPP3CB|SYT7|SLC17A7	0
GO Biological Processes	GO:0072657	protein localization to membrane	-2	ACTN2|AKT2|ANK2|ARL3|DLG4|DPP6|DVL1|FLOT2|JUP|PRKCZ|SGTA|STX3|STXBP1|BAG6|NRXN1|PREPL|ARL6IP5|CYP46A1|TRAM1|REEP2|CCDC88A|GPR158|WDR19|RAB40C|PALS1|ATAD1|SHANK3|SYS1|MYADM|TTC7B|ZDHHC20	0
GO Biological Processes	GO:0006903	vesicle targeting	-2	SEPTIN5|TFG|YKT6|EXOC6B|CLASP1|TRAPPC4|EXOC2|TRAPPC11	0
GO Biological Processes	GO:0030705	cytoskeleton-dependent intracellular transport	-2	APBA1|ARL3|KIF1A|AP3S1|FLOT2|MAP1A|PAFAH1B1|PRKCZ|UBB|SUN1|CLIP3|CALY|MAP1S|CCDC88A|ARHGAP21|WDR19|TMEM108|TRIM46	0
GO Biological Processes	GO:0010769	regulation of cell morphogenesis involved in differentiation	-2	CAMK2B|CUX1|DLG4|PAFAH1B1|SS18L1|GPRASP3	0
KEGG Pathway	hsa04721	Synaptic vesicle cycle	-3.8	ATP6V1C1|ATP6V0B|AP2M1|CLTC|DNM1|SLC1A2|SLC6A9|STX3|STXBP1|ATP6V1D|ATP6V1H|SLC17A7	-0.97
KEGG Pathway	hsa05012	Parkinson disease	-3.6	CAMK2A|CAMK2B|GNAS|KLC1|NDUFB6|NDUFV3|SEPTIN5|PSMA2|PSMB1|PSMB3|PSMB7|SDHC|SNCA|UBB|UBC|VDAC1|TUBB4A|ATP5PD|HTRA2|SLC39A3|TUBA8|CYCS|MFN1|SLC39A10|KLC2	-0.88
KEGG Pathway	hsa03250	Viral life cycle - HIV-1	-2.7	CCNT1|CCNT2|MAP1A|MLLT1|KAT2B|CPSF6|MAP1S|SERINC5	-0.28
KEGG Pathway	hsa04925	Aldosterone synthesis and secretion	-2.5	ADCY2|ATP2B2|ATP2B3|DAGLA|CAMK2A|CAMK2B|SCARB1|ATF6B|GNAS|PRKCG|CACNA1G	-0.23
KEGG Pathway	hsa05022	Pathways of neurodegeneration - multiple diseases	-2.5	CAMK2A|CAMK2B|DCTN1|DLG4|DVL1|GRIN1|GSK3B|KLC1|NDUFB6|NDUFV3|SEPTIN5|PPP3CB|PRKCG|MAPK11|MAP2K7|PSMA2|PSMB1|PSMB3|PSMB7|RYR1|ATXN2|SDHC|SNCA|UBB|UBC|VDAC1|TUBB4A|ATP5PD|HTRA2|TUBA8|CYCS|ATG2B|MFN1|KLC2	-0.22
KEGG Pathway	hsa05016	Huntington disease	-2.5	AP2M1|CLTC|DCTN1|DLG4|GRIN1|KLC1|NDUFB6|NDUFV3|POLR2E|POLR2F|MAP2K7|PSMA2|PSMB1|PSMB3|PSMB7|SDHC|SLC1A2|VDAC1|TUBB4A|ATP5PD|TUBA8|CYCS|ATG2B|KLC2	-0.19
KEGG Pathway	hsa05020	Prion disease	-2.4	ATF6B|FYN|GRIN1|GSK3B|KLC1|NCAM1|NDUFB6|NDUFV3|PPP3CB|MAPK11|PSMA2|PSMB1|PSMB3|PSMB7|RYR1|SDHC|VDAC1|TUBB4A|ATP5PD|TUBA8|CYCS|KLC2	-0.15
KEGG Pathway	hsa00563	Glycosylphosphatidylinositol (GPI)-anchor biosynthesis	-2.3	PIGF|DPM2|PIGT|MPPE1|PIGU	-0.063
KEGG Pathway	hsa04724	Glutamatergic synapse	-2.3	ADCY2|DLG4|GNAS|GNB1|GRIN1|GRM7|PPP3CB|PRKCG|SLC1A2|DLGAP1|SLC17A7|SHANK3	-0.059
KEGG Pathway	hsa04728	Dopaminergic synapse	-2.2	AKT2|CAMK2A|CAMK2B|ATF6B|GNAS|GNB1|GSK3B|PPP2R2B|PPP3CB|PRKCG|MAPK11|CALY|PPP1R1B	-0.045
KEGG Pathway	hsa01040	Biosynthesis of unsaturated fatty acids	-2.2	FADS1|FADS2|SCD5|ACOT4|HACD2	-0.045
KEGG Pathway	hsa04961	Endocrine and other factor-regulated calcium reabsorption	-2.1	ATP2B2|ATP2B3|AP2M1|CLTC|DNM1|GNAS|PRKCG	0
KEGG Pathway	hsa04911	Insulin secretion	-2	ADCY2|CAMK2A|CAMK2B|ATF6B|GNAS|KCNN1|PRKCG|ABCC8|RIMS2	0
KEGG Pathway	hsa05031	Amphetamine addiction	-2	CAMK2A|CAMK2B|ATF6B|GNAS|GRIN1|PPP3CB|PRKCG|PPP1R1B	0
KEGG Pathway	hsa04261	Adrenergic signaling in cardiomyocytes	-2	ADCY2|AKT2|ATP2B2|ATP2B3|CACNA2D1|CAMK2A|CAMK2B|ATF6B|GNAS|PPP1R1A|PPP2R2B|MAPK11|TPM2|TPM3	0
KEGG Pathway	hsa05010	Alzheimer disease	-2	AKT2|DVL1|GRIN1|GSK3B|KLC1|LRP1|NDUFB6|NDUFV3|PPP3CB|MAP2K7|PSMA2|PSMB1|PSMB3|PSMB7|SDHC|SNCA|VDAC1|NAE1|RTN3|TUBB4A|ATP5PD|SLC39A3|TUBA8|CYCS|ATG2B|SLC39A10|KLC2	0

## Sheet: Liver-only DEGs
Category	GO	Description	LogP	Hits	Log(q-value)
GO Biological Processes	GO:0002181	cytoplasmic translation	-17	FAU|RPSA|RPL5|RPL7|RPL11|RPL13|RPL17|RPL18|RPL18A|RPL21|RPL23A|RPL24|RPL26|RPL27|RPL30|RPL27A|RPL29|RPL31|RPL32|RPL35A|RPL37|RPL37A|RPL38|RPL39|RPL36A|RPLP2|RPS2|RPS3|RPS3A|RPS5|RPS7|RPS8|RPS9|RPS10|RPS12|RPS13|RPS14|RPS15|RPS17|RPS19|RPS20|RPS21|RPS23|RPS27|RPS27A|RPS28|RPS29|UBA52|RPL23|RACK1|EIF3M|RPL35|RPL36|EIF3K|MCTS1	-13
GO Biological Processes	GO:0006119	oxidative phosphorylation	-17	ATP5F1A|ATP5F1E|ATP5ME|ATP5PF|ATP5PO|COX5B|COX6B1|COX6C|COX7A1|COX7A2P2|COX7B|COX15|COX3|ND1|ND2|ND3|ND4|ND6|NDUFA1|NDUFA2|NDUFA4|NDUFA6|NDUFA7|NDUFA8|NDUFB1|NDUFB2|NDUFB4|NDUFB5|NDUFB8|NDUFB9|NDUFB10|NDUFC2|NDUFS5|NDUFS6|SDHD|UQCRFS1|COX7A2L|COX5A|ATP5MF|ATP5PD|ATP5MG|UQCRQ|UQCR10|NDUFA13|NDUFB11|NDUFA12|TEFM|COX4I2|NDUFS7|COA6|CHCHD10|UQCC3	-13
GO Biological Processes	GO:0009206	purine ribonucleoside triphosphate biosynthetic process	-15	NUDT2|ATP5F1A|ATP5F1E|ATP5MC1|ATP5MC2|ATP5ME|ATP5PF|ATP5PO|ND1|ND2|ND3|ND4|ND6|NDUFA1|NDUFA2|NDUFA6|NDUFA7|NDUFA8|NDUFB1|NDUFB2|NDUFB4|NDUFB5|NDUFB8|NDUFB9|NDUFB10|NDUFC2|NDUFS5|NDUFS6|NME2|SDHD|ATP5MF|ATP5MJ|ATP5PD|ATP5MG|NME7|NDUFA13|NDUFB11|NDUFA12|ATP5MK|AK9|NME9|NDUFS7|UQCC3	-11
GO Biological Processes	GO:0015986	proton motive force-driven ATP synthesis	-15	ATP5F1A|ATP5F1E|ATP5MC1|ATP5MC2|ATP5ME|ATP5PF|ATP5PO|ND1|ND2|ND3|ND4|ND6|NDUFA1|NDUFA2|NDUFA6|NDUFA7|NDUFA8|NDUFB1|NDUFB2|NDUFB4|NDUFB5|NDUFB8|NDUFB9|NDUFB10|NDUFC2|NDUFS5|NDUFS6|SDHD|ATP5MF|ATP5MJ|ATP5PD|ATP5MG|NDUFA13|NDUFB11|NDUFA12|ATP5MK|NDUFS7	-11
GO Biological Processes	GO:0009145	purine nucleoside triphosphate biosynthetic process	-15	NUDT2|ATP5F1A|ATP5F1E|ATP5MC1|ATP5MC2|ATP5ME|ATP5PF|ATP5PO|ND1|ND2|ND3|ND4|ND6|NDUFA1|NDUFA2|NDUFA6|NDUFA7|NDUFA8|NDUFB1|NDUFB2|NDUFB4|NDUFB5|NDUFB8|NDUFB9|NDUFB10|NDUFC2|NDUFS5|NDUFS6|NME2|SDHD|ATP5MF|ATP5MJ|ATP5PD|ATP5MG|NME7|NDUFA13|NDUFB11|NDUFA12|ATP5MK|AK9|NME9|NDUFS7|UQCC3	-11
GO Biological Processes	GO:0006754	ATP biosynthetic process	-14	NUDT2|ATP5F1A|ATP5F1E|ATP5MC1|ATP5MC2|ATP5ME|ATP5PF|ATP5PO|ND1|ND2|ND3|ND4|ND6|NDUFA1|NDUFA2|NDUFA6|NDUFA7|NDUFA8|NDUFB1|NDUFB2|NDUFB4|NDUFB5|NDUFB8|NDUFB9|NDUFB10|NDUFC2|NDUFS5|NDUFS6|SDHD|ATP5MF|ATP5MJ|ATP5PD|ATP5MG|NDUFA13|NDUFB11|NDUFA12|ATP5MK|AK9|NDUFS7|UQCC3	-11
GO Biological Processes	GO:0006412	translation	-14	DIO2|EEF2|EIF5A|FAU|RPSA|NDUFA7|RPL3L|RPL5|RPL7|RPL11|RPL13|RPL17|RPL18|RPL18A|RPL21|RPL23A|MRPL23|RPL24|RPL26|RPL27|RPL30|RPL27A|RPL29|RPL31|RPL32|RPL35A|RPL37|RPL37A|RPL38|RPL39|RPL36A|RPLP2|RPS2|RPS3|RPS3A|RPS5|RPS7|RPS8|RPS9|RPS10|RPS12|RPS13|RPS14|RPS15|RPS17|RPS19|RPS20|RPS21|RPS23|RPS27|RPS27A|RPS28|RPS29|UBA52|EIF1AY|RPL23|MRPL33|SECISBP2L|MRPL19|TNIP1|RACK1|EIF3M|COPS5|MRPL3|RPL35|HARS2|…	-11
GO Biological Processes	GO:0033108	mitochondrial respiratory chain complex assembly	-14	BCS1L|ND1|ND2|ND4|ND6|NDUFA1|NDUFA2|NDUFA6|NDUFA8|NDUFB1|NDUFB2|NDUFB4|NDUFB5|NDUFB8|NDUFB9|NDUFB10|NDUFC2|NDUFS5|SURF1|UQCRFS1|COX17|NDUFA13|COX16|NDUFB11|TMEM126B|NDUFA12|NDUFAF5|TMEM126A|SLC25A33|UQCC2|COX14|DMAC1|NDUFAF2|COX20|NDUFAF6|NDUFAF8|NDUFS7|SMIM20|UQCC5|COA5|UQCC6|UQCC3|PET100	-11
GO Biological Processes	GO:0009201	ribonucleoside triphosphate biosynthetic process	-14	NUDT2|ATP5F1A|ATP5F1E|ATP5MC1|ATP5MC2|ATP5ME|ATP5PF|ATP5PO|ND1|ND2|ND3|ND4|ND6|NDUFA1|NDUFA2|NDUFA6|NDUFA7|NDUFA8|NDUFB1|NDUFB2|NDUFB4|NDUFB5|NDUFB8|NDUFB9|NDUFB10|NDUFC2|NDUFS5|NDUFS6|NME2|SDHD|ATP5MF|ATP5MJ|ATP5PD|ATP5MG|NME7|NDUFA13|NDUFB11|NDUFA12|ATP5MK|AK9|NME9|NDUFS7|UQCC3	-11
GO Biological Processes	GO:0042776	proton motive force-driven mitochondrial ATP synthesis	-13	ATP5F1A|ATP5F1E|ATP5ME|ATP5PF|ATP5PO|ND1|ND2|ND3|ND4|ND6|NDUFA1|NDUFA2|NDUFA6|NDUFA7|NDUFA8|NDUFB1|NDUFB2|NDUFB4|NDUFB5|NDUFB8|NDUFB9|NDUFB10|NDUFC2|NDUFS5|NDUFS6|SDHD|ATP5MF|ATP5PD|ATP5MG|NDUFA13|NDUFB11|NDUFA12|NDUFS7	-10
GO Biological Processes	GO:0009142	nucleoside triphosphate biosynthetic process	-13	AK1|AK4|NUDT2|ATP5F1A|ATP5F1E|ATP5MC1|ATP5MC2|ATP5ME|ATP5PF|ATP5PO|ND1|ND2|ND3|ND4|ND6|NDUFA1|NDUFA2|NDUFA6|NDUFA7|NDUFA8|NDUFB1|NDUFB2|NDUFB4|NDUFB5|NDUFB8|NDUFB9|NDUFB10|NDUFC2|NDUFS5|NDUFS6|NME2|SDHD|TYMS|ATP5MF|ATP5MJ|ATP5PD|ATP5MG|NME7|NDUFA13|NDUFB11|NDUFA12|ATP5MK|AK9|NME9|NDUFS7|UQCC3	-10
GO Biological Processes	GO:0042775	mitochondrial ATP synthesis coupled electron transport	-13	COX5B|COX6B1|COX6C|COX7A1|COX7A2P2|COX7B|COX15|COX3|ND1|ND2|ND3|ND4|ND6|NDUFA1|NDUFA2|NDUFA4|NDUFA6|NDUFA7|NDUFA8|NDUFB1|NDUFB2|NDUFB4|NDUFB5|NDUFB8|NDUFB9|NDUFB10|NDUFC2|NDUFS5|NDUFS6|SDHD|UQCRFS1|COX7A2L|COX5A|UQCRQ|UQCR10|NDUFA12|COX4I2|NDUFS7|COA6|UQCC3	-10
GO Biological Processes	GO:0042773	ATP synthesis coupled electron transport	-13	COX5B|COX6B1|COX6C|COX7A1|COX7A2P2|COX7B|COX15|COX3|ND1|ND2|ND3|ND4|ND6|NDUFA1|NDUFA2|NDUFA4|NDUFA6|NDUFA7|NDUFA8|NDUFB1|NDUFB2|NDUFB4|NDUFB5|NDUFB8|NDUFB9|NDUFB10|NDUFC2|NDUFS5|NDUFS6|SDHD|UQCRFS1|COX7A2L|COX5A|UQCRQ|UQCR10|NDUFA12|COX4I2|NDUFS7|COA6|UQCC3	-10
GO Biological Processes	GO:0043043	peptide biosynthetic process	-13	DIO2|EEF2|EIF5A|FAU|RPSA|MGST2|NDUFA7|RPL3L|RPL5|RPL7|RPL11|RPL13|RPL17|RPL18|RPL18A|RPL21|RPL23A|MRPL23|RPL24|RPL26|RPL27|RPL30|RPL27A|RPL29|RPL31|RPL32|RPL35A|RPL37|RPL37A|RPL38|RPL39|RPL36A|RPLP2|RPS2|RPS3|RPS3A|RPS5|RPS7|RPS8|RPS9|RPS10|RPS12|RPS13|RPS14|RPS15|RPS17|RPS19|RPS20|RPS21|RPS23|RPS27|RPS27A|RPS28|RPS29|UBA52|EIF1AY|RPL23|MRPL33|SECISBP2L|MRPL19|TNIP1|RACK1|EIF3M|COPS5|MRPL3|RPL35|…	-9.9
GO Biological Processes	GO:0019646	aerobic electron transport chain	-13	COX5B|COX6B1|COX6C|COX7A1|COX7A2P2|COX7B|COX15|COX3|ND1|ND2|ND3|ND4|ND6|NDUFA1|NDUFA2|NDUFA4|NDUFA6|NDUFA7|NDUFA8|NDUFB1|NDUFB2|NDUFB4|NDUFB5|NDUFB8|NDUFB9|NDUFB10|NDUFC2|NDUFS5|NDUFS6|SDHD|UQCRFS1|COX7A2L|COX5A|UQCRQ|UQCR10|COX4I2|NDUFS7|UQCC3	-9.7
GO Biological Processes	GO:0009060	aerobic respiration	-12	ADSL|ATP5F1A|ATP5F1E|ATP5ME|ATP5PF|ATP5PO|COX5B|COX6B1|COX6C|COX7A1|COX7A2P2|COX7B|COX15|COX3|ND1|ND2|ND3|ND4|ND6|NDUFA1|NDUFA2|NDUFA4|NDUFA6|NDUFA7|NDUFA8|NDUFB1|NDUFB2|NDUFB4|NDUFB5|NDUFB8|NDUFB9|NDUFB10|NDUFC2|NDUFS5|NDUFS6|SDHD|SURF1|UQCRFS1|COX7A2L|COX5A|ATP5MF|ATP5PD|ATP5MG|UQCRQ|UQCR10|NDUFA13|NDUFB11|NDUFA12|TEFM|PANK2|COX4I2|MTFR2|NDUFS7|COA6|CHCHD10|UQCC3	-9.5
GO Biological Processes	GO:0032981	mitochondrial respiratory chain complex I assembly	-11	BCS1L|ND1|ND2|ND4|ND6|NDUFA1|NDUFA2|NDUFA6|NDUFA8|NDUFB1|NDUFB2|NDUFB4|NDUFB5|NDUFB8|NDUFB9|NDUFB10|NDUFC2|NDUFS5|NDUFA13|NDUFB11|TMEM126B|NDUFA12|NDUFAF5|TMEM126A|DMAC1|NDUFAF2|NDUFAF6|NDUFAF8|NDUFS7	-8.2
GO Biological Processes	GO:0010257	NADH dehydrogenase complex assembly	-11	BCS1L|ND1|ND2|ND4|ND6|NDUFA1|NDUFA2|NDUFA6|NDUFA8|NDUFB1|NDUFB2|NDUFB4|NDUFB5|NDUFB8|NDUFB9|NDUFB10|NDUFC2|NDUFS5|NDUFA13|NDUFB11|TMEM126B|NDUFA12|NDUFAF5|TMEM126A|DMAC1|NDUFAF2|NDUFAF6|NDUFAF8|NDUFS7	-8.2
GO Biological Processes	GO:0045333	cellular respiration	-11	ADSL|ATP5F1A|ATP5F1E|ATP5ME|ATP5PF|ATP5PO|COX5B|COX6B1|COX6C|COX7A1|COX7A2P2|COX7B|COX15|ETFA|ETFB|COX3|ND1|ND2|ND3|ND4|ND6|NDUFA1|NDUFA2|NDUFA4|NDUFA6|NDUFA7|NDUFA8|NDUFB1|NDUFB2|NDUFB4|NDUFB5|NDUFB8|NDUFB9|NDUFB10|NDUFC2|NDUFS5|NDUFS6|NFATC4|SDHD|SURF1|UQCRFS1|COX7A2L|COX5A|ATP5MF|ATP5PD|ATP5MG|UQCRQ|UQCR10|NDUFA13|NDUFB11|NDUFA12|TEFM|PANK2|COX4I2|MTFR2|SLC25A25|NDUFS7|COA6|CHCHD10|UQCC3	-8.1
GO Biological Processes	GO:0022904	respiratory electron transport chain	-10	COX5B|COX6B1|COX6C|COX7A1|COX7A2P2|COX7B|COX15|ETFA|ETFB|COX3|ND1|ND2|ND3|ND4|ND6|NDUFA1|NDUFA2|NDUFA4|NDUFA6|NDUFA7|NDUFA8|NDUFB1|NDUFB2|NDUFB4|NDUFB5|NDUFB8|NDUFB9|NDUFB10|NDUFC2|NDUFS5|NDUFS6|SDHD|UQCRFS1|COX7A2L|COX5A|UQCRQ|UQCR10|NDUFA12|COX4I2|NDUFS7|COA6|UQCC3	-7.6
GO Biological Processes	GO:0022900	electron transport chain	-10	ADH5|ALDH2|COX5B|COX6B1|COX6C|COX7A1|COX7A2P2|COX7B|COX15|CYBB|ETFA|ETFB|FDX1|COX3|ND1|ND2|ND3|ND4|ND6|NDUFA1|NDUFA2|NDUFA4|NDUFA6|NDUFA7|NDUFA8|NDUFB1|NDUFB2|NDUFB4|NDUFB5|NDUFB8|NDUFB9|NDUFB10|NDUFC2|NDUFS5|NDUFS6|SDHD|SURF1|UQCRFS1|AKR7A2|RDH16|COX7A2L|COX5A|PHGDH|UQCRQ|UQCR10|GLRX2|NDUFA12|STEAP4|COX4I2|FDX2|NDUFS7|COA6|UQCC3	-7.5
GO Biological Processes	GO:0009144	purine nucleoside triphosphate metabolic process	-9.4	AK1|AK4|NUDT2|ATP5F1A|ATP5F1E|ATP5MC1|ATP5MC2|ATP5ME|ATP5PF|ATP5PO|GALK1|HK3|FOXK2|ITPA|ND1|ND2|ND3|ND4|ND6|NDUFA1|NDUFA2|NDUFA6|NDUFA7|NDUFA8|NDUFB1|NDUFB2|NDUFB4|NDUFB5|NDUFB8|NDUFB9|NDUFB10|NDUFC2|NDUFS5|NDUFS6|NME2|SDHD|IER3|ATP5MF|ATP5MJ|ATP5PD|ATP5MG|NUDT5|SAMHD1|NME7|NDUFA13|PRKAG3|NDUFB11|NDUFA12|ATP5MK|SLC25A25|LRRK2|AK9|NME9|NDUFS7|UQCC3	-6.7
GO Biological Processes	GO:0009205	purine ribonucleoside triphosphate metabolic process	-9.4	AK1|AK4|NUDT2|ATP5F1A|ATP5F1E|ATP5MC1|ATP5MC2|ATP5ME|ATP5PF|ATP5PO|GALK1|HK3|FOXK2|ITPA|ND1|ND2|ND3|ND4|ND6|NDUFA1|NDUFA2|NDUFA6|NDUFA7|NDUFA8|NDUFB1|NDUFB2|NDUFB4|NDUFB5|NDUFB8|NDUFB9|NDUFB10|NDUFC2|NDUFS5|NDUFS6|NME2|SDHD|IER3|ATP5MF|ATP5MJ|ATP5PD|ATP5MG|NUDT5|NME7|NDUFA13|PRKAG3|NDUFB11|NDUFA12|ATP5MK|SLC25A25|LRRK2|AK9|NME9|NDUFS7|UQCC3	-6.7
GO Biological Processes	GO:0006518	peptide metabolic process	-9.4	TPP1|CPD|DIO2|EEF2|EIF5A|FAU|GSTM3|RPSA|MEP1A|MGAT3|MGST2|NDUFA7|RPL3L|RPL5|RPL7|RPL11|RPL13|RPL17|RPL18|RPL18A|RPL21|RPL23A|MRPL23|RPL24|RPL26|RPL27|RPL30|RPL27A|RPL29|RPL31|RPL32|RPL35A|RPL37|RPL37A|RPL38|RPL39|RPL36A|RPLP2|RPS2|RPS3|RPS3A|RPS5|RPS7|RPS8|RPS9|RPS10|RPS12|RPS13|RPS14|RPS15|RPS17|RPS19|RPS20|RPS21|RPS23|RPS27|RPS27A|RPS28|RPS29|UBA52|EIF1AY|RPL23|GSTO1|MRPL33|ECE2|SECISBP2L|SPCS2…	-6.7
GO Biological Processes	GO:0046034	ATP metabolic process	-9.4	AK1|AK4|NUDT2|ATP5F1A|ATP5F1E|ATP5MC1|ATP5MC2|ATP5ME|ATP5PF|ATP5PO|GALK1|HK3|FOXK2|ND1|ND2|ND3|ND4|ND6|NDUFA1|NDUFA2|NDUFA6|NDUFA7|NDUFA8|NDUFB1|NDUFB2|NDUFB4|NDUFB5|NDUFB8|NDUFB9|NDUFB10|NDUFC2|NDUFS5|NDUFS6|SDHD|IER3|ATP5MF|ATP5MJ|ATP5PD|ATP5MG|NUDT5|NDUFA13|PRKAG3|NDUFB11|NDUFA12|ATP5MK|SLC25A25|AK9|NDUFS7|UQCC3	-6.7
GO Biological Processes	GO:0009199	ribonucleoside triphosphate metabolic process	-8.7	AK1|AK4|NUDT2|ATP5F1A|ATP5F1E|ATP5MC1|ATP5MC2|ATP5ME|ATP5PF|ATP5PO|GALK1|HK3|FOXK2|ITPA|ND1|ND2|ND3|ND4|ND6|NDUFA1|NDUFA2|NDUFA6|NDUFA7|NDUFA8|NDUFB1|NDUFB2|NDUFB4|NDUFB5|NDUFB8|NDUFB9|NDUFB10|NDUFC2|NDUFS5|NDUFS6|NME2|SDHD|IER3|ATP5MF|ATP5MJ|ATP5PD|ATP5MG|NUDT5|NME7|NDUFA13|PRKAG3|NDUFB11|NDUFA12|ATP5MK|SLC25A25|LRRK2|AK9|NME9|NDUFS7|UQCC3	-6.1
GO Biological Processes	GO:0006120	mitochondrial electron transport, NADH to ubiquinone	-8.6	ND1|ND2|ND3|ND4|ND6|NDUFA1|NDUFA2|NDUFA4|NDUFA6|NDUFA7|NDUFA8|NDUFB1|NDUFB2|NDUFB4|NDUFB5|NDUFB8|NDUFB9|NDUFB10|NDUFC2|NDUFS5|NDUFS6|NDUFS7	-5.9
GO Biological Processes	GO:0015980	energy derivation by oxidation of organic compounds	-8.4	ADSL|ATP5F1A|ATP5F1E|ATP5ME|ATP5PF|ATP5PO|COX5B|COX6B1|COX6C|COX7A1|COX7A2P2|COX7B|COX15|ETFA|ETFB|GSK3B|LEPR|MT3|COX3|ND1|ND2|ND3|ND4|ND6|NDUFA1|NDUFA2|NDUFA4|NDUFA6|NDUFA7|NDUFA8|NDUFB1|NDUFB2|NDUFB4|NDUFB5|NDUFB8|NDUFB9|NDUFB10|NDUFC2|NDUFS5|NDUFS6|NFATC4|SDHD|SURF1|UGP2|UQCRFS1|COX7A2L|KL|COX5A|ATP5MF|ATP5PD|ATP5MG|UQCRQ|UQCR10|NDUFA13|PRKAG3|NDUFB11|NDUFA12|PPP1R3B|TEFM|PANK2|STK40|COX4I2|MT…	-5.7
GO Biological Processes	GO:0007005	mitochondrion organization	-8.3	ATP7A|BCS1L|TSPO|CEBPA|COX7A1|COX7A2P2|EPAS1|GSK3B|HSPD1|MAPT|MEF2A|ND1|ND2|ND4|ND6|NDUFA1|NDUFA2|NDUFA6|NDUFA8|NDUFB1|NDUFB2|NDUFB4|NDUFB5|NDUFB8|NDUFB9|NDUFB10|NDUFC2|NDUFS5|NOS3|PRKN|SSBP1|SURF1|UQCRFS1|VDAC2|OGT|IER3|COX7A2L|ATG5|FEZ1|COX17|TIMM17A|GABARAPL2|ATG14|ATG2A|CLUH|HEBP2|TIMM10B|HTRA2|NDUFA13|CHCHD2|COX16|SNX7|NDUFB11|TOMM7|TMEM70|TMEM126B|NDUFA12|RAB5IF|NDUFAF5|MAIP1|MYH14|CAMKMT|P…	-5.7
GO Biological Processes	GO:0043604	amide biosynthetic process	-8.3	CEBPA|DIO2|EEF2|EIF5A|FAU|RPSA|MGST2|NDUFA7|RPL3L|RPL5|RPL7|RPL11|RPL13|RPL17|RPL18|RPL18A|RPL21|RPL23A|MRPL23|RPL24|RPL26|RPL27|RPL30|RPL27A|RPL29|RPL31|RPL32|RPL35A|RPL37|RPL37A|RPL38|RPL39|RPL36A|RPLP2|RPS2|RPS3|RPS3A|RPS5|RPS7|RPS8|RPS9|RPS10|RPS12|RPS13|RPS14|RPS15|RPS17|RPS19|RPS20|RPS21|RPS23|RPS27|RPS27A|RPS28|RPS29|UBA52|B4GALT3|EIF1AY|HACD1|RPL23|TECR|MRPL33|SECISBP2L|MRPL19|TNIP1|RACK1…	-5.7
GO Biological Processes	GO:0009141	nucleoside triphosphate metabolic process	-8	AK1|AK4|NUDT2|ATP5F1A|ATP5F1E|ATP5MC1|ATP5MC2|ATP5ME|ATP5PF|ATP5PO|GALK1|HK3|FOXK2|ITPA|ND1|ND2|ND3|ND4|ND6|NDUFA1|NDUFA2|NDUFA6|NDUFA7|NDUFA8|NDUFB1|NDUFB2|NDUFB4|NDUFB5|NDUFB8|NDUFB9|NDUFB10|NDUFC2|NDUFS5|NDUFS6|NME2|SDHD|TYMS|IER3|ATP5MF|ATP5MJ|ATP5PD|ATP5MG|NUDT5|SAMHD1|NME7|NDUFA13|PRKAG3|NDUFB11|NDUFA12|ATP5MK|SLC25A25|LRRK2|AK9|NME9|NDUFS7|UQCC3	-5.5
GO Biological Processes	GO:0006091	generation of precursor metabolites and energy	-7.3	ADH5|ADSL|ALDH2|ATP5F1A|ATP5F1E|ATP5ME|ATP5PF|ATP5PO|CEBPA|COX5B|COX6B1|COX6C|COX7A1|COX7A2P2|COX7B|COX15|CYBB|ETFA|ETFB|FDX1|GALK1|GSK3B|HK3|HMGCS2|FOXK2|LEPR|MT3|COX3|ND1|ND2|ND3|ND4|ND6|NDUFA1|NDUFA2|NDUFA4|NDUFA6|NDUFA7|NDUFA8|NDUFB1|NDUFB2|NDUFB4|NDUFB5|NDUFB8|NDUFB9|NDUFB10|NDUFC2|NDUFS5|NDUFS6|NFATC4|PPARD|SDHD|SURF1|UGP2|UQCRFS1|AKR7A2|RDH16|IER3|COX7A2L|KL|COX5A|ATP5MF|COX17|ATP5PD|ATP5M…	-4.7
GO Biological Processes	GO:0009152	purine ribonucleotide biosynthetic process	-7.2	ADSL|AK1|AK4|AMPD2|NUDT2|ATP5F1A|ATP5F1E|ATP5MC1|ATP5MC2|ATP5ME|ATP5PF|ATP5PO|ND1|ND2|ND3|ND4|ND6|NDUFA1|NDUFA2|NDUFA6|NDUFA7|NDUFA8|NDUFB1|NDUFB2|NDUFB4|NDUFB5|NDUFB8|NDUFB9|NDUFB10|NDUFC2|NDUFS5|NDUFS6|NME2|SDHD|HACD1|TECR|ATP5MF|ATP5MJ|ATP5PD|ATP5MG|ACSL6|NME7|NDUFA13|NDUFB11|NDUFA12|PPCDC|PANK2|ATP5MK|AK9|NME9|NDUFS7|UQCC3	-4.7
GO Biological Processes	GO:0006164	purine nucleotide biosynthetic process	-7.1	ADSL|AK1|AK4|AMPD2|NUDT2|ATP5F1A|ATP5F1E|ATP5MC1|ATP5MC2|ATP5ME|ATP5PF|ATP5PO|DCK|ND1|ND2|ND3|ND4|ND6|NDUFA1|NDUFA2|NDUFA6|NDUFA7|NDUFA8|NDUFB1|NDUFB2|NDUFB4|NDUFB5|NDUFB8|NDUFB9|NDUFB10|NDUFC2|NDUFS5|NDUFS6|NME2|SDHD|HACD1|SLC22A13|TECR|ATP5MF|ATP5MJ|ATP5PD|ATP5MG|NMNAT2|ACSL6|QPRT|NME7|NDUFA13|NDUFB11|NADSYN1|NDUFA12|PPCDC|PANK2|ATP5MK|AK9|NME9|NDUFS7|MTHFD2L|UQCC3	-4.6
GO Biological Processes	GO:0072522	purine-containing compound biosynthetic process	-6.9	ADSL|AK1|AK4|AMPD2|NUDT2|ATP5F1A|ATP5F1E|ATP5MC1|ATP5MC2|ATP5ME|ATP5PF|ATP5PO|DCK|ND1|ND2|ND3|ND4|ND6|NDUFA1|NDUFA2|NDUFA6|NDUFA7|NDUFA8|NDUFB1|NDUFB2|NDUFB4|NDUFB5|NDUFB8|NDUFB9|NDUFB10|NDUFC2|NDUFS5|NDUFS6|NME2|SDHD|HACD1|SLC22A13|TECR|ATP5MF|ATP5MJ|ATP5PD|ATP5MG|NMNAT2|ACSL6|QPRT|NME7|NDUFA13|ADA2|NDUFB11|NADSYN1|NDUFA12|PPCDC|PANK2|ATP5MK|AK9|NME9|NDUFS7|MTHFD2L|UQCC3	-4.4
GO Biological Processes	GO:0017004	cytochrome complex assembly	-6.8	BCS1L|COX15|COX3|SURF1|UQCRFS1|COX17|COX16|SLC25A33|UQCC2|COX14|COX20|COA6|SMIM20|UQCC5|COA5|UQCC6|UQCC3|PET100	-4.3
GO Biological Processes	GO:0009260	ribonucleotide biosynthetic process	-6.5	ADSL|AK1|AK4|AMPD2|NUDT2|ATP5F1A|ATP5F1E|ATP5MC1|ATP5MC2|ATP5ME|ATP5PF|ATP5PO|DCK|ND1|ND2|ND3|ND4|ND6|NDUFA1|NDUFA2|NDUFA6|NDUFA7|NDUFA8|NDUFB1|NDUFB2|NDUFB4|NDUFB5|NDUFB8|NDUFB9|NDUFB10|NDUFC2|NDUFS5|NDUFS6|NME2|SDHD|HACD1|TECR|ATP5MF|ATP5MJ|ATP5PD|ATP5MG|ACSL6|NME7|NDUFA13|NDUFB11|NDUFA12|PPCDC|PANK2|ATP5MK|AK9|NME9|NDUFS7|UQCC3	-4
GO Biological Processes	GO:0046390	ribose phosphate biosynthetic process	-6	ADSL|AK1|AK4|AMPD2|NUDT2|ATP5F1A|ATP5F1E|ATP5MC1|ATP5MC2|ATP5ME|ATP5PF|ATP5PO|DCK|ND1|ND2|ND3|ND4|ND6|NDUFA1|NDUFA2|NDUFA6|NDUFA7|NDUFA8|NDUFB1|NDUFB2|NDUFB4|NDUFB5|NDUFB8|NDUFB9|NDUFB10|NDUFC2|NDUFS5|NDUFS6|NME2|SDHD|HACD1|TECR|ATP5MF|ATP5MJ|ATP5PD|ATP5MG|ACSL6|NME7|NDUFA13|NDUFB11|NDUFA12|PPCDC|PANK2|ATP5MK|AK9|NME9|NDUFS7|UQCC3	-3.5
GO Biological Processes	GO:0008535	respiratory chain complex IV assembly	-5.8	BCS1L|COX15|COX3|SURF1|COX17|COX16|COX14|COX20|COA6|SMIM20|UQCC5|COA5|UQCC6|PET100	-3.3
GO Biological Processes	GO:1902600	proton transmembrane transport	-5.7	ATP5F1A|ATP5F1E|ATP5MC1|ATP5MC2|ATP5ME|ATP5PF|ATP6AP1|ATP5PO|COX5B|COX6B1|COX7A1|COX7B|COX15|COX3|ND4|SLC25A3|SLC15A1|SLC16A1|SURF1|UCP1|UQCRFS1|COX7A2L|ATP6V1F|COX5A|ATP5MF|ATP5PD|ATP5MG|UQCR10|ATP6V1H|SLC4A10|SLC4A11|COX4I2|NDUFS7|RNASEK	-3.2
GO Biological Processes	GO:0009165	nucleotide biosynthetic process	-5.3	ADSL|AK1|AK4|AMPD2|NUDT2|ATP5F1A|ATP5F1E|ATP5MC1|ATP5MC2|ATP5ME|ATP5PF|ATP5PO|DCK|ND1|ND2|ND3|ND4|ND6|NDUFA1|NDUFA2|NDUFA6|NDUFA7|NDUFA8|NDUFB1|NDUFB2|NDUFB4|NDUFB5|NDUFB8|NDUFB9|NDUFB10|NDUFC2|NDUFS5|NDUFS6|NME2|SDHD|TYMS|HACD1|SLC22A13|TECR|ATP5MF|ATP5MJ|ATP5PD|ATP5MG|NMNAT2|ACSL6|QPRT|NME7|NDUFA13|NDUFB11|NADSYN1|NDUFA12|PPCDC|PANK2|ATP5MK|AK9|NME9|NDUFS7|MTHFD2L|UQCC3	-2.8
GO Biological Processes	GO:1901293	nucleoside phosphate biosynthetic process	-5.2	ADSL|AK1|AK4|AMPD2|NUDT2|ATP5F1A|ATP5F1E|ATP5MC1|ATP5MC2|ATP5ME|ATP5PF|ATP5PO|DCK|ND1|ND2|ND3|ND4|ND6|NDUFA1|NDUFA2|NDUFA6|NDUFA7|NDUFA8|NDUFB1|NDUFB2|NDUFB4|NDUFB5|NDUFB8|NDUFB9|NDUFB10|NDUFC2|NDUFS5|NDUFS6|NME2|SDHD|TYMS|HACD1|SLC22A13|TECR|ATP5MF|ATP5MJ|ATP5PD|ATP5MG|NMNAT2|ACSL6|QPRT|NME7|NDUFA13|NDUFB11|NADSYN1|NDUFA12|PPCDC|PANK2|ATP5MK|AK9|NME9|NDUFS7|MTHFD2L|UQCC3	-2.7
GO Biological Processes	GO:0006123	mitochondrial electron transport, cytochrome c to oxygen	-5.2	COX5B|COX6B1|COX6C|COX7A1|COX7A2P2|COX7B|COX15|COX3|NDUFA4|COX7A2L|COX5A|COX4I2	-2.7
GO Biological Processes	GO:0060213	positive regulation of nuclear-transcribed mRNA poly(A) tail shortening	-4.9	POLR2G|ZFP36|BTG2|TOB1|CNOT1|TNRC6B|PABPC1|AGO2|TNRC6C	-2.5
GO Biological Processes	GO:0000028	ribosomal small subunit assembly	-4.8	RPSA|RPL38|RPS5|RPS14|RPS15|RPS19|RPS27|RPS28|RPS27L|MRPS11	-2.4
GO Biological Processes	GO:0033617	mitochondrial cytochrome c oxidase assembly	-4.6	BCS1L|SURF1|COX17|COX16|COX14|COX20|SMIM20|UQCC5|COA5|UQCC6|PET100	-2.1
GO Biological Processes	GO:0032543	mitochondrial translation	-4.3	NDUFA7|MRPL23|MRPL33|MRPL19|MRPL3|MRPS28|MRPL42|MRPL18|MRPS18C|MRPL2|MRPL51|MRPL27|MRPS23|MRPS33|MRPL39|MRPL50|MRPL20|QRSL1|RARS2|MRPL47|MRPL14|MRPS11|MRPS6|MRPL36|MRPL34|MRPL9|TARS2|MRPL43|MRPL54|MRPL21	-1.9
GO Biological Processes	GO:0006163	purine nucleotide metabolic process	-4.2	ADSL|AK1|AK4|AMPD2|NUDT2|ATP5F1A|ATP5F1E|ATP5MC1|ATP5MC2|ATP5ME|ATP5PF|ATP5PO|DCK|FMO5|GALK1|HINT1|HK3|HMGCS2|FOXK2|ITPA|LDHB|ND1|ND2|ND3|ND4|ND6|NDUFA1|NDUFA2|NDUFA6|NDUFA7|NDUFA8|NDUFB1|NDUFB2|NDUFB4|NDUFB5|NDUFB8|NDUFB9|NDUFB10|NDUFC2|NDUFS5|NDUFS6|NME2|PDE4B|RORA|SDHD|IER3|HACD1|SLC22A13|TJP2|TECR|ATP5MF|ATP5MJ|ATP5PD|DNPH1|ATP5MG|NUDT5|NMNAT2|SARM1|ACSL6|QPRT|SAMHD1|NME7|DERA|NDUFA13|PRKAG3|…	-1.8
GO Biological Processes	GO:0060211	regulation of nuclear-transcribed mRNA poly(A) tail shortening	-4.2	POLR2G|ZFP36|BTG2|TOB1|CNOT1|TNRC6B|PABPC1|AGO2|TNRC6C	-1.8
GO Biological Processes	GO:0009150	purine ribonucleotide metabolic process	-4.1	ADSL|AK1|AK4|AMPD2|NUDT2|ATP5F1A|ATP5F1E|ATP5MC1|ATP5MC2|ATP5ME|ATP5PF|ATP5PO|GALK1|HINT1|HK3|HMGCS2|FOXK2|ITPA|ND1|ND2|ND3|ND4|ND6|NDUFA1|NDUFA2|NDUFA6|NDUFA7|NDUFA8|NDUFB1|NDUFB2|NDUFB4|NDUFB5|NDUFB8|NDUFB9|NDUFB10|NDUFC2|NDUFS5|NDUFS6|NME2|PDE4B|RORA|SDHD|IER3|HACD1|TJP2|TECR|ATP5MF|ATP5MJ|ATP5PD|ATP5MG|NUDT5|ACSL6|NME7|NDUFA13|PRKAG3|NDUFB11|OXSM|NDUFA12|PPCDC|MCCC2|NUDT18|PANK2|ACSF2|CARD11|…	-1.7
GO Biological Processes	GO:1900153	positive regulation of nuclear-transcribed mRNA catabolic process, deadenylation-dependent decay	-3.9	ZFP36L1|ZFP36|TOB1|CNOT1|TNRC6B|PABPC1|AGO2|TNRC6C	-1.5
GO Biological Processes	GO:0140053	mitochondrial gene expression	-3.8	FOXO3|NDUFA7|MRPL23|MRPL33|MRPL19|MRPL3|MRPS28|MRPL42|MRPL18|MRPS18C|MRPL2|MRPL51|MRPL27|MRPS23|MRPS33|MRPL39|MRPL50|TRMT10C|TRMT61B|MRPL20|QRSL1|RARS2|MRPL47|MRPL14|MRPS11|MRPS6|MRPL36|MRPL34|MRPL9|TEFM|TARS2|SLC25A33|MRPL43|MRPL54|MRPL21	-1.4
GO Biological Processes	GO:1904667	negative regulation of ubiquitin protein ligase activity	-3.6	RPL5|RPL11|RPL37|RPS7|RPS15|RPS20|RPL23	-1.2
GO Biological Processes	GO:0043409	negative regulation of MAPK cascade	-3.3	ABL1|ATF3|CSK|CYLD|DAG1|DUSP1|DUSP4|DUSP5|DUSP6|DUSP8|FOXO1|GPER1|IGBP1|NF1|PEBP1|PRKN|PER1|PPIA|PRKCD|PTPN1|PTPRJ|PTPRR|UCHL1|HDAC3|SH2B3|HIPK3|TNIP1|ABCA7|NUP62|ERRFI1|PBK|SEMA6A|CDK5RAP3|DUSP16|SPRY4|NLRP6	-0.97
GO Biological Processes	GO:0050727	regulation of inflammatory response	-3.3	ADORA1|ALOX5AP|AOAH|BCR|BTK|DAGLA|CDH5|CEBPA|CNR1|CYLD|ELF4|F12|FGR|GPER1|IL1R1|IL10|IL15|IL18|JAK2|LGALS2|MGST2|NDUFC2|NFKBIA|PPARD|PRKCD|PSMB4|PTGER3|RORA|RPS19|TNFRSF1A|TNFRSF1B|TYRO3|ZFP36|ZYX|BAP1|CST7|IER3|SPHK1|SOCS3|KLF4|TNIP1|SBNO2|BRD4|FBXL2|GIT1|PBK|WFDC1|TRPV4|SLC39A8|ADAMTS12|TTBK1|IL33|LRRK2|NLRP5|C2CD4A|NLRP6|NLRC3|FFAR4|CCR2|ACOD1	-0.91
GO Biological Processes	GO:0002385	mucosal immune response	-3.3	DEFB1|FAU|LTF|NOS2|RPL39|OTUD7B|RAB17	-0.91
GO Biological Processes	GO:1901798	positive regulation of signal transduction by p53 class mediator	-3.3	EIF5A|MSX1|PML|RPL11|RPL26|RPL37|RPS7|RPS15|RPS20|RPL23|CDK5RAP3	-0.91
GO Biological Processes	GO:0061844	antimicrobial humoral immune response mediated by antimicrobial peptide	-3.1	DEFB1|FAU|CXCL2|LTF|PF4|RPL30|RPL39|RPS19|CXCL6|BPIFA1|LEAP2	-0.75
GO Biological Processes	GO:0030071	regulation of mitotic metaphase/anaphase transition	-3	ACTB|APC|BIRC5|BUB1|CDC20|CENPE|DUSP1|TPR|ARID1A|BCL7B|TRIP13|ESPL1|ANAPC15|ANAPC11|SPDL1|ZWILCH|CDCA8|RIOK2|SPC25|ARID1B|NUF2|SPC24|ARID2	-0.71
GO Biological Processes	GO:0051412	response to corticosterone	-3	ATP2B1|CCND1|FOS|HSD3B1|NTRK3|TH|FOSL1	-0.66
GO Biological Processes	GO:1902255	positive regulation of intrinsic apoptotic signaling pathway by p53 class mediator	-3	EIF5A|MSX1|RPL11|RPL26|RPS7	-0.66
GO Biological Processes	GO:0019221	cytokine-mediated signaling pathway	-3	ACTN4|CEACAM1|CBL|CEBPA|CCR1|CSF1R|CSF2RA|CSF3R|EGR1|EIF5A|EREG|FOXO3|FLT3|CXCL2|IFNAR1|IL1R1|IL13RA2|IL15|IL18|JAK1|JAK2|LEPR|MST1R|MT3|NFKBIA|PF4|PTPRJ|CCL4|CCL11|CCL25|CXCL6|STAT3|STAT4|STAT5A|TFF2|TNFRSF1A|TNFRSF1B|TRAF5|TYK2|LRP8|IL1R2|OASL|IL18R1|IL27RA|TRAF4|SH2B3|CIB1|PLCB1|WNK1|IL33|CCR2	-0.65
GO Biological Processes	GO:0034551	mitochondrial respiratory chain complex III assembly	-2.9	BCS1L|UQCRFS1|SLC25A33|UQCC2|UQCC6|UQCC3	-0.64
GO Biological Processes	GO:0060049	regulation of protein glycosylation	-2.9	IL15|MT3|RAMP1|SLC51B|MGAT4D|ACER2	-0.64
GO Biological Processes	GO:0017062	respiratory chain complex III assembly	-2.9	BCS1L|UQCRFS1|SLC25A33|UQCC2|UQCC6|UQCC3	-0.64
GO Biological Processes	GO:1902099	regulation of metaphase/anaphase transition of cell cycle	-2.9	ACTB|APC|BIRC5|BUB1|CDC20|CENPE|DUSP1|TPR|ARID1A|BCL7B|TRIP13|ESPL1|ANAPC15|ANAPC11|SPDL1|ZWILCH|CDCA8|RIOK2|SPC25|ARID1B|NUF2|SPC24|ARID2	-0.59
GO Biological Processes	GO:0033045	regulation of sister chromatid segregation	-2.9	ACTB|APC|BIRC5|BUB1|CDC20|CENPE|DUSP1|NUMA1|TPR|ARID1A|BCL7B|TRIP13|ESPL1|ANAPC15|ANAPC11|SPDL1|ZWILCH|CDCA8|RIOK2|SPC25|ARID1B|NUF2|RMI2|SPC24|ARID2	-0.59
GO Biological Processes	GO:0051444	negative regulation of ubiquitin-protein transferase activity	-2.8	ABL1|CDC20|RPL5|RPL11|RPL37|RPS7|RPS15|RPS20|RPL23	-0.52
GO Biological Processes	GO:0031114	regulation of microtubule depolymerization	-2.8	APC|MAP1A|MAP1B|CIB1|STMN2|TPX2|CAMSAP2|CLASP1|TAOK1|TRPV4|NAV3	-0.51
GO Biological Processes	GO:0002251	organ or tissue specific immune response	-2.7	DEFB1|FAU|LTF|NOS2|RPL39|OTUD7B|RAB17	-0.47
GO Biological Processes	GO:0061014	positive regulation of mRNA catabolic process	-2.7	ZFP36L1|POLR2G|ZFP36|BTG2|PUM1|TOB1|EXOSC8|EXOSC7|CNOT1|TNRC6B|TARDBP|PABPC1|AGO2|RC3H2|SAMD4B|EXOSC5|TNRC6C|RC3H1|PATL2|PATL1|YTHDF3|MEX3D	-0.47
GO Biological Processes	GO:0050728	negative regulation of inflammatory response	-2.7	ADORA1|AOAH|BCR|CDH5|CYLD|ELF4|FGR|GPER1|IL10|PPARD|PRKCD|PSMB4|RORA|RPS19|TNFRSF1A|TNFRSF1B|TYRO3|ZFP36|CST7|IER3|SOCS3|KLF4|GIT1|PBK|WFDC1|SLC39A8|NLRP6|NLRC3|FFAR4|ACOD1	-0.46
GO Biological Processes	GO:0033047	regulation of mitotic sister chromatid segregation	-2.7	APC|BIRC5|BUB1|CDC20|DUSP1|NUMA1|TPR|TRIP13|ANAPC15|SPDL1|ZWILCH|CDCA8|SPC25|NUF2|SPC24	-0.46
GO Biological Processes	GO:0010965	regulation of mitotic sister chromatid separation	-2.7	APC|BIRC5|BUB1|CDC20|DUSP1|TPR|TRIP13|ESPL1|ANAPC15|ANAPC11|SPDL1|ZWILCH|CDCA8|SPC25|NUF2|SPC24	-0.42
GO Biological Processes	GO:1900151	regulation of nuclear-transcribed mRNA catabolic process, deadenylation-dependent decay	-2.6	ZFP36L1|ZFP36|TOB1|CNOT1|TNRC6B|PABPC1|AGO2|TNRC6C|RC3H1	-0.39
GO Biological Processes	GO:1903313	positive regulation of mRNA metabolic process	-2.6	ZFP36L1|CIRBP|NUP98|POLR2G|ZFP36|BTG2|PRDX6|PUM1|TOB1|EXOSC8|EXOSC7|CNOT1|TNRC6B|TARDBP|PABPC1|AGO2|TRA2A|RC3H2|SAMD4B|CELF4|EXOSC5|TNRC6C|RC3H1|PATL2|PATL1|YTHDF3|MEX3D	-0.39
GO Biological Processes	GO:0002227	innate immune response in mucosa	-2.6	DEFB1|FAU|LTF|NOS2|RPL39	-0.39
GO Biological Processes	GO:0061072	iris morphogenesis	-2.6	HIF1A|WNT2|WNT9A|HIPK2|HIPK1	-0.39
GO Biological Processes	GO:1901184	regulation of ERBB signaling pathway	-2.6	ADORA1|ADRA2A|CEACAM1|CBL|EGFR|EREG|GPER1|RBPJ|PDE6G|PTPRJ|TGFA|RAB7A|GPRC5A|NEURL1|MVP|AGR2|NEU3|NUP62|ERRFI1|SH3TC2	-0.37
GO Biological Processes	GO:1901186	positive regulation of ERBB signaling pathway	-2.6	ADORA1|ADRA2A|CBL|EREG|GPER1|RBPJ|PDE6G|TGFA|NEURL1|AGR2|NEU3|NUP62	-0.34
GO Biological Processes	GO:2000628	regulation of miRNA metabolic process	-2.5	EGFR|EGR1|FOXO3|FOS|HIF1A|IL10|JUN|SMAD1|NFATC3|NFATC4|PPARD|SREBF2|SRF|STAT3|FOSL1|KLF4|ZSWIM8|RC3H2|RC3H1	-0.31
GO Biological Processes	GO:1905636	positive regulation of RNA polymerase II regulatory region sequence-specific DNA binding	-2.5	EP300|DAZAP2|LAMTOR5	-0.31
GO Biological Processes	GO:0007094	mitotic spindle assembly checkpoint signaling	-2.5	APC|BUB1|CDC20|TPR|TRIP13|SPDL1|ZWILCH|SPC25|NUF2|SPC24	-0.3
GO Biological Processes	GO:0071174	mitotic spindle checkpoint signaling	-2.5	APC|BUB1|CDC20|TPR|TRIP13|SPDL1|ZWILCH|SPC25|NUF2|SPC24	-0.3
GO Biological Processes	GO:0071173	spindle assembly checkpoint signaling	-2.5	APC|BUB1|CDC20|TPR|TRIP13|SPDL1|ZWILCH|SPC25|NUF2|SPC24	-0.3
GO Biological Processes	GO:0060038	cardiac muscle cell proliferation	-2.5	ABL1|SMAD1|PRKAR1A|MAPK11|SKI|TGFBR3|WNT2|ARID2|DIPK2A	-0.28
GO Biological Processes	GO:0042415	norepinephrine metabolic process	-2.4	ATP7A|EPAS1|PRKN|TH|KL|MOXD1	-0.23
GO Biological Processes	GO:0038066	p38MAPK cascade	-2.4	ZFP36L1|MAP3K5|MAPK11|MAP2K6|ZFP36|MAPKAPK2	-0.23
GO Biological Processes	GO:0099188	postsynaptic cytoskeleton organization	-2.4	ACTB|ACTG1|NEFH|INA|WASF2|SRCIN1	-0.23
GO Biological Processes	GO:0055017	cardiac muscle tissue growth	-2.4	ABL1|SMAD1|PRKAR1A|MAPK11|SKI|TGFBR3|WNT2|SORBS2|AKAP13|ARID2|DIPK2A	-0.22
GO Biological Processes	GO:0031577	spindle checkpoint signaling	-2.4	APC|BUB1|CDC20|TPR|TRIP13|SPDL1|ZWILCH|SPC25|NUF2|SPC24	-0.2
GO Biological Processes	GO:1990868	response to chemokine	-2.4	CCR1|DUSP1|CXCL2|LOX|PF4|CCL4|CCL11|CCL25|CXCL6|TFF2|SH2B3|CIB1|WNK1|CCR2	-0.2
GO Biological Processes	GO:1990869	cellular response to chemokine	-2.4	CCR1|DUSP1|CXCL2|LOX|PF4|CCL4|CCL11|CCL25|CXCL6|TFF2|SH2B3|CIB1|WNK1|CCR2	-0.2
GO Biological Processes	GO:1904666	regulation of ubiquitin protein ligase activity	-2.3	CDC20|PEX12|RPL5|RPL11|RPL37|RPS7|RPS15|RPS20|RPL23	-0.18
GO Biological Processes	GO:0071276	cellular response to cadmium ion	-2.3	ATP7A|CYBB|EGFR|FOS|HMOX1|JUN|MT3|SUMO1	-0.17
GO Biological Processes	GO:1905907	negative regulation of amyloid fibril formation	-2.3	PFDN1|PFDN4|PFDN5|VBP1|PFDN6	-0.17
GO Biological Processes	GO:0042058	regulation of epidermal growth factor receptor signaling pathway	-2.3	ADORA1|ADRA2A|CEACAM1|CBL|EGFR|EREG|GPER1|PDE6G|PTPRJ|TGFA|RAB7A|GPRC5A|NEURL1|MVP|AGR2|NEU3|NUP62|ERRFI1	-0.16
GO Biological Processes	GO:0019730	antimicrobial humoral response	-2.3	DEFB1|FAU|CXCL2|JCHAIN|LTF|PF4|RPL30|RPL39|RPS19|CXCL6|SPON2|BPIFA1|LEAP2	-0.16
GO Biological Processes	GO:0120252	hydrocarbon metabolic process	-2.3	CYP2E1|GRIN1|TH|BCO2	-0.16
GO Biological Processes	GO:0098597	observational learning	-2.3	HTT|NF1|NRXN1|NRXN2	-0.16
GO Biological Processes	GO:0043619	regulation of transcription from RNA polymerase II promoter in response to oxidative stress	-2.3	EPAS1|HIF1A|HMOX1|SIN3A	-0.16
GO Biological Processes	GO:1903670	regulation of sprouting angiogenesis	-2.3	CEACAM1|FGF1|IL10|JAK1|SMAD1|TJP1|KLF4|CEMIP2|ADAMTS9|SEMA6A|JCAD	-0.16
GO Biological Processes	GO:0045742	positive regulation of epidermal growth factor receptor signaling pathway	-2.3	ADORA1|ADRA2A|CBL|EREG|GPER1|PDE6G|TGFA|NEURL1|AGR2|NEU3|NUP62	-0.16
GO Biological Processes	GO:0007093	mitotic cell cycle checkpoint signaling	-2.2	APC|CCND1|BUB1|CDK1|CDC20|CDKN1A|FOXN3|PML|RPL26|TPR|IER3|NAE1|TRIP13|BABAM1|RPS27L|WAC|TRIAP1|SPDL1|ZWILCH|SPC25|TAOK1|CDK5RAP3|NUF2|TICRR|SPC24	-0.14
GO Biological Processes	GO:0033046	negative regulation of sister chromatid segregation	-2.2	APC|BUB1|CDC20|TPR|TRIP13|SPDL1|ZWILCH|SPC25|NUF2|SPC24	-0.14
GO Biological Processes	GO:0045841	negative regulation of mitotic metaphase/anaphase transition	-2.2	APC|BUB1|CDC20|TPR|TRIP13|SPDL1|ZWILCH|SPC25|NUF2|SPC24	-0.14
GO Biological Processes	GO:0042100	B cell proliferation	-2.2	ABL1|CD19|CD40|HSPD1|IL10|PRKCD|SHB|CARD11|TICAM1|GAPT	-0.14
GO Biological Processes	GO:2000816	negative regulation of mitotic sister chromatid separation	-2.2	APC|BUB1|CDC20|TPR|TRIP13|SPDL1|ZWILCH|SPC25|NUF2|SPC24	-0.14
GO Biological Processes	GO:0033048	negative regulation of mitotic sister chromatid segregation	-2.2	APC|BUB1|CDC20|TPR|TRIP13|SPDL1|ZWILCH|SPC25|NUF2|SPC24	-0.14
GO Biological Processes	GO:0070098	chemokine-mediated signaling pathway	-2.2	CCR1|CXCL2|PF4|CCL4|CCL11|CCL25|CXCL6|TFF2|SH2B3|CIB1|WNK1|CCR2	-0.13
GO Biological Processes	GO:0007130	synaptonemal complex assembly	-2.2	SYCP1|TRIP13|SYCP2|P3H4|SYCE1|SYCE2	-0.11
GO Biological Processes	GO:0030277	maintenance of gastrointestinal epithelium	-2.2	MUC2|MUC4|TFF2|TFF3|INAVA|MUC13	-0.11
GO Biological Processes	GO:0007026	negative regulation of microtubule depolymerization	-2.2	APC|MAP1B|CIB1|STMN2|TPX2|CAMSAP2|CLASP1|TAOK1|NAV3	-0.11
GO Biological Processes	GO:0060419	heart growth	-2.2	ABL1|SMAD1|PRKAR1A|MAPK11|SKI|TGFBR3|WNT2|SORBS2|AKAP13|ARID2|DIPK2A	-0.09
GO Biological Processes	GO:1903672	positive regulation of sprouting angiogenesis	-2.2	FGF1|IL10|JAK1|SMAD1|TJP1|KLF4|JCAD	-0.084
GO Biological Processes	GO:0014855	striated muscle cell proliferation	-2.1	ABL1|FOS|SMAD1|PRKAR1A|MAPK11|SKI|TGFBR3|WNT2|ARID2|DIPK2A	-0.052
GO Biological Processes	GO:0051985	negative regulation of chromosome segregation	-2.1	APC|BUB1|CDC20|TPR|TRIP13|SPDL1|ZWILCH|SPC25|NUF2|SPC24	-0.052
GO Biological Processes	GO:1902100	negative regulation of metaphase/anaphase transition of cell cycle	-2.1	APC|BUB1|CDC20|TPR|TRIP13|SPDL1|ZWILCH|SPC25|NUF2|SPC24	-0.052
GO Biological Processes	GO:1905819	negative regulation of chromosome separation	-2.1	APC|BUB1|CDC20|TPR|TRIP13|SPDL1|ZWILCH|SPC25|NUF2|SPC24	-0.052
GO Biological Processes	GO:0051646	mitochondrion localization	-2.1	HIF1A|MAP1B|MAPT|MARK1|MEF2A|UCHL1|UXT|FEZ1|CLUH|TLE6|MGARP|LRRK2|BRAT1|PLIN5	-0.028
GO Biological Processes	GO:2000630	positive regulation of miRNA metabolic process	-2.1	EGFR|EGR1|FOXO3|FOS|HIF1A|IL10|JUN|SMAD1|SREBF2|SRF|STAT3|FOSL1|KLF4|ZSWIM8	-0.028
GO Biological Processes	GO:1901077	regulation of relaxation of muscle	-2.1	GRK2|HRC|PDE4B|PLN|SRI	-0.015
GO Biological Processes	GO:0072577	endothelial cell apoptotic process	-2.1	COL4A3|IL10|MAP3K5|ANGPTL4|HIPK1	-0.015
GO Biological Processes	GO:1902895	positive regulation of miRNA transcription	-2	EGFR|EGR1|FOXO3|FOS|HIF1A|IL10|JUN|SMAD1|SREBF2|SRF|STAT3|FOSL1|KLF4	0
GO Biological Processes	GO:0018108	peptidyl-tyrosine phosphorylation	-2	ABL1|BCR|BMX|BTK|CSF1R|CSK|EGFR|EPHB3|FGFR4|FGR|FLT3|IL15|JAK1|JAK2|MST1R|NTRK3|PRKCD|MAP2K6|SPINK1|TYK2|TYRO3|ZAP70|DYRK4|AATK|MELK|HIPK3|HIPK2|PBK|PEAK1|TTBK1|HIPK1	0
GO Biological Processes	GO:0030502	negative regulation of bone mineralization	-2	CCR1|HIF1A|SRGN|FGF23|RFLNA|RFLNB	0
GO Biological Processes	GO:0009313	oligosaccharide catabolic process	-2	MAN2B1|NEU2|SI|NEU3|GBA3|NEU4	0
GO Biological Processes	GO:0150105	protein localization to cell-cell junction	-2	ACTB|ACTG1|CDH5|JAK1|TJP1|TJP2|TJP3	0
GO Biological Processes	GO:0042255	ribosome assembly	-2	RPSA|RPL5|RPL11|RPL23A|RPL38|RPS5|RPS14|RPS15|RPS19|RPS27|RPS28|RPS27L|MRPL20|MRPS11	0
GO Biological Processes	GO:1902893	regulation of miRNA transcription	-2	EGFR|EGR1|FOXO3|FOS|HIF1A|IL10|JUN|SMAD1|NFATC3|NFATC4|PPARD|SREBF2|SRF|STAT3|FOSL1|KLF4	0
KEGG Pathway	hsa03010	Ribosome	-27	FAU|RPSA|RPL3L|RPL5|RPL7|RPL11|RPL13|RPL17|RPL18|RPL18A|RPL21|RPL23A|MRPL23|RPL24|RPL26|RPL27|RPL30|RPL27A|RPL29|RPL31|RPL32|RPL35A|RPL37|RPL37A|RPL38|RPL39|RPL36A|RPLP2|RPS2|RPS3|RPS3A|RPS5|RPS7|RPS8|RPS9|RPS10|RPS12|RPS13|RPS14|RPS15|RPS17|RPS19|RPS20|RPS21|RPS23|RPS27|RPS27A|RPS28|RPS29|UBA52|RPL23|MRPL33|MRPL19|MRPL3|RPL35|RPL36|MRPL18|MRPS18C|RPS27L|MRPL2|MRPL27|MRPL20|MRPL14|MRPS11|MRPS6|MR…	-23
KEGG Pathway	hsa05171	Coronavirus disease - COVID-19	-16	ADAR|CYBB|EGFR|F13A1|FAU|FOS|IFNAR1|JAK1|JUN|RPSA|NFKBIA|PRKCG|MAPK11|MAPK10|RPL3L|RPL5|RPL7|RPL11|RPL13|RPL17|RPL18|RPL18A|RPL21|RPL23A|RPL24|RPL26|RPL27|RPL30|RPL27A|RPL29|RPL31|RPL32|RPL35A|RPL37|RPL37A|RPL38|RPL39|RPL36A|RPLP2|RPS2|RPS3|RPS3A|RPS5|RPS7|RPS8|RPS9|RPS10|RPS12|RPS13|RPS14|RPS15|RPS17|RPS19|RPS20|RPS21|RPS23|RPS27|RPS27A|RPS28|RPS29|STAT3|TMPRSS2|TNFRSF1A|TYK2|UBA52|RPL23|RPL35|T…	-12
KEGG Pathway	hsa00190	Oxidative phosphorylation	-15	ATP5F1A|ATP5F1E|ATP5MC1|ATP5MC2|ATP5ME|ATP5PF|ATP6AP1|ATP5PO|COX5B|COX6B1|COX6C|COX7A1|COX7B|COX15|COX3|ND1|ND2|ND3|ND4|ND6|NDUFA1|NDUFA2|NDUFA4|NDUFA6|NDUFA7|NDUFA8|NDUFB1|NDUFB2|NDUFB4|NDUFB5|NDUFB8|NDUFB9|NDUFB10|NDUFC2|NDUFS5|NDUFS6|SDHD|UQCRFS1|COX7A2L|ATP6V1F|COX5A|ATP5MF|COX17|ATP5PD|ATP5MG|UQCRQ|UQCR10|NDUFA13|ATP6V1H|NDUFB11|NDUFA12|COX4I2|NDUFS7	-12
KEGG Pathway	hsa05208	Chemical carcinogenesis - reactive oxygen species	-13	ABL1|ATP5F1A|ATP5F1E|ATP5MC1|ATP5MC2|ATP5PF|ATP5PO|COX5B|COX6B1|COX6C|COX7A1|COX7B|CYP2E1|EGFR|FOXO3|FOS|GSTM3|HIF1A|HMOX1|JUN|MAP3K5|MGST1|MGST2|MGST3|COX3|ND1|ND2|ND3|ND4|ND6|NDUFA1|NDUFA2|NDUFA4|NDUFA6|NDUFA7|NDUFA8|NDUFB1|NDUFB2|NDUFB4|NDUFB5|NDUFB8|NDUFB9|NDUFB10|NDUFC2|NDUFS5|NDUFS6|NFE2L2|NFKBIA|PRKCD|PRKD1|MAPK11|MAPK10|PTPN1|PTPRJ|SDHD|UQCRFS1|VDAC2|COX7A2L|COX5A|GSTO1|AKR1A1|ATP5PD|UQCR…	-10
KEGG Pathway	hsa05012	Parkinson disease	-13	ATP5F1A|ATP5F1E|ATP5MC1|ATP5MC2|ATP5PF|ATP5PO|COX5B|COX6B1|COX6C|COX7A1|COX7B|DUSP1|ITPR2|KIF5C|MAPT|MAP3K5|COX3|ND1|ND2|ND3|ND4|ND6|NDUFA1|NDUFA2|NDUFA4|NDUFA6|NDUFA7|NDUFA8|NDUFB1|NDUFB2|NDUFB4|NDUFB5|NDUFB8|NDUFB9|NDUFB10|NDUFC2|NDUFS5|NDUFS6|NFE2L2|PRKN|SEPTIN5|MAPK10|PSMA7|PSMB4|PSMB5|PSMB6|PSMB7|PSMC2|PSMC6|PSMD8|RPS27A|SDHD|TH|TXN|UBA52|UCHL1|UQCRFS1|VDAC2|SEM1|COX7A2L|COX5A|TUBB3|ATP5PD|U…	-10
KEGG Pathway	hsa04714	Thermogenesis	-12	ACTB|ACTG1|ATP5F1A|ATP5F1E|ATP5MC1|ATP5MC2|ATP5ME|ATP5PF|ATP5PO|CNR1|COX5B|COX6B1|COX6C|COX7A1|COX7B|COX15|MAP3K5|COX3|ND1|ND2|ND3|ND4|ND6|NDUFA1|NDUFA2|NDUFA4|NDUFA6|NDUFA7|NDUFA8|NDUFB1|NDUFB2|NDUFB4|NDUFB5|NDUFB8|NDUFB9|NDUFB10|NDUFC2|NDUFS5|NDUFS6|MAPK11|RPS6KA3|SDHD|UCP1|UQCRFS1|ARID1A|COX7A2L|COX5A|ATP5MF|COX17|ATP5PD|ATP5MG|ACSL6|UQCRQ|UQCR10|NDUFA13|COX16|KDM3B|PRKAG3|NDUFB11|NDUFA12|ARID…	-9.6
KEGG Pathway	hsa05016	Huntington disease	-11	AP2A1|ATP5F1A|ATP5F1E|ATP5MC1|ATP5MC2|ATP5PF|ATP5PO|AP2S1|COX5B|COX6B1|COX6C|COX7A1|COX7B|CREBBP|EP300|GRIN1|HTT|KIF5C|MAP3K5|COX3|ND1|ND2|ND3|ND4|ND6|NDUFA1|NDUFA2|NDUFA4|NDUFA6|NDUFA7|NDUFA8|NDUFB1|NDUFB2|NDUFB4|NDUFB5|NDUFB8|NDUFB9|NDUFB10|NDUFC2|NDUFS5|NDUFS6|POLR2F|POLR2G|MAPK10|PSMA7|PSMB4|PSMB5|PSMB6|PSMB7|PSMC2|PSMC6|PSMD8|SDHD|SP1|UCP1|UQCRFS1|VDAC2|SEM1|DNAH11|COX7A2L|COX5A|TUBB3|ATP5PD…	-8
KEGG Pathway	hsa05014	Amyotrophic lateral sclerosis	-10	ACTB|ACTG1|ATP5F1A|ATP5F1E|ATP5MC1|ATP5MC2|ATP5PF|ATP5PO|COX5B|COX6B1|COX6C|COX7A1|COX7B|GRIN1|KIF5C|MAP3K5|COX3|ND1|ND2|ND3|ND4|ND6|NDUFA1|NDUFA2|NDUFA4|NDUFA6|NDUFA7|NDUFA8|NDUFB1|NDUFB2|NDUFB4|NDUFB5|NDUFB8|NDUFB9|NDUFB10|NDUFC2|NDUFS5|NDUFS6|NEFM|NEFH|NOS2|NUP98|PRKN|MAPK11|MAP2K6|PSMA7|PSMB4|PSMB5|PSMB6|PSMB7|PSMC2|PSMC6|PSMD8|RANBP2|SDHD|TNFRSF1A|TNFRSF1B|TPR|UQCRFS1|SEM1|DNAH11|COX7A2L|COX…	-7.4
KEGG Pathway	hsa05020	Prion disease	-9.9	ATP5F1A|ATP5F1E|ATP5MC1|ATP5MC2|ATP5PF|ATP5PO|CACNA1S|COX5B|COX6B1|COX6C|COX7A1|COX7B|CYBB|EGR1|GRIN1|GSK3B|ITPR2|KIF5C|LAMC1|COX3|ND1|ND2|ND3|ND4|ND6|NCAM1|NDUFA1|NDUFA2|NDUFA4|NDUFA6|NDUFA7|NDUFA8|NDUFB1|NDUFB2|NDUFB4|NDUFB5|NDUFB8|NDUFB9|NDUFB10|NDUFC2|NDUFS5|NDUFS6|PRKCD|MAPK11|MAPK10|PSMA7|PSMB4|PSMB5|PSMB6|PSMB7|PSMC2|PSMC6|PSMD8|SDHD|UQCRFS1|VDAC2|SEM1|COX7A2L|COX5A|TUBB3|ATP5PD|UQCRQ|UQCR…	-7.2
KEGG Pathway	hsa04932	Non-alcoholic fatty liver disease	-8.3	CEBPA|COX5B|COX6B1|COX6C|COX7A1|COX7B|CYP2E1|FOS|GSK3B|JUN|LEPR|MAP3K5|COX3|NDUFA1|NDUFA2|NDUFA4|NDUFA6|NDUFA7|NDUFA8|NDUFB1|NDUFB2|NDUFB4|NDUFB5|NDUFB8|NDUFB9|NDUFB10|NDUFC2|NDUFS5|NDUFS6|MAPK11|MAPK10|SDHD|TNFRSF1A|UQCRFS1|IRS2|SOCS3|COX7A2L|COX5A|UQCRQ|UQCR10|NDUFA13|PRKAG3|NDUFB11|NDUFA12|COX4I2|NDUFS7	-5.7
KEGG Pathway	hsa05010	Alzheimer disease	-8.2	APC|ATP5F1A|ATP5F1E|ATP5MC1|ATP5MC2|ATP5PF|ATP5PO|CACNA1S|CAPN2|COX5B|COX6B1|COX6C|COX7A1|COX7B|CYBB|DVL3|GRIN1|GSK3B|ITPR2|KIF5C|LRP1|MAPT|MAP3K5|COX3|ND1|ND2|ND3|ND4|ND6|NDUFA1|NDUFA2|NDUFA4|NDUFA6|NDUFA7|NDUFA8|NDUFB1|NDUFB2|NDUFB4|NDUFB5|NDUFB8|NDUFB9|NDUFB10|NDUFC2|NDUFS5|NDUFS6|NOS2|MAPK10|PSMA7|PSMB4|PSMB5|PSMB6|PSMB7|PSMC2|PSMC6|PSMD8|SDHD|TNFRSF1A|UQCRFS1|VDAC2|WNT2|WNT6|WNT7B|WNT9A|SEM1…	-5.6
KEGG Pathway	hsa05415	Diabetic cardiomyopathy	-8.2	ATP5F1A|ATP5F1E|ATP5MC1|ATP5MC2|ATP5PF|ATP5PO|COX5B|COX6B1|COX6C|COX7A1|COX7B|CYBB|GSK3B|COX3|ND1|ND2|ND3|ND4|ND6|NDUFA1|NDUFA2|NDUFA4|NDUFA6|NDUFA7|NDUFA8|NDUFB1|NDUFB2|NDUFB4|NDUFB5|NDUFB8|NDUFB9|NDUFB10|NDUFC2|NDUFS5|NDUFS6|NOS3|PLN|PRKCD|PRKCG|MAPK11|MAPK10|SDHD|SP1|TGFBR2|UQCRFS1|VDAC2|COX7A2L|COX5A|ATP5PD|PLCB1|UQCRQ|UQCR10|NDUFA13|NDUFB11|NDUFA12|COX4I2|NDUFS7	-5.6
KEGG Pathway	hsa05022	Pathways of neurodegeneration - multiple diseases	-8.2	APC|ATP5F1A|ATP5F1E|ATP5MC1|ATP5MC2|ATP5PF|ATP5PO|CACNA1S|CAPN2|COX5B|COX6B1|COX6C|COX7A1|COX7B|CYBB|DVL3|GRIN1|GRM1|GSK3B|HTT|ITPR2|KIF5C|MAPT|MAP3K5|COX3|ND1|ND2|ND3|ND4|ND6|NDUFA1|NDUFA2|NDUFA4|NDUFA6|NDUFA7|NDUFA8|NDUFB1|NDUFB2|NDUFB4|NDUFB5|NDUFB8|NDUFB9|NDUFB10|NDUFC2|NDUFS5|NDUFS6|NEFM|NEFH|NOS2|PRKN|SEPTIN5|PRKCG|MAPK11|MAPK10|MAP2K6|PSMA7|PSMB4|PSMB5|PSMB6|PSMB7|PSMC2|PSMC6|PSMD8|RPS27A|…	-5.6
KEGG Pathway	hsa04723	Retrograde endocannabinoid signaling	-5.9	DAGLA|CACNA1S|CNR1|GABRA3|GABRE|GNAO1|GNG4|GNG5|GRM1|ITPR2|ND1|ND2|ND3|ND4|ND6|NDUFA1|NDUFA2|NDUFA4|NDUFA6|NDUFA7|NDUFA8|NDUFB1|NDUFB2|NDUFB4|NDUFB5|NDUFB8|NDUFB9|NDUFB10|NDUFC2|NDUFS5|NDUFS6|PRKCG|MAPK11|MAPK10|GNB5|PLCB1|NDUFA13|NDUFB11|NDUFA12|SLC17A7|NDUFS7	-3.4
KEGG Pathway	hsa05167	Kaposi sarcoma-associated herpesvirus infection	-3	ANGPT2|CCND1|CDKN1A|CCR1|CREBBP|EP300|FOS|GNG4|GNG5|CXCL2|GSK3B|HIF1A|IFNAR1|ITPR2|JAK1|JAK2|JUN|NFATC3|NFATC4|NFKBIA|MAPK11|MAPK10|MAP2K6|RPS27A|STAT3|TNFRSF1A|TYK2|UBA52|ZFP36|MAPKAPK2|GNB5|ATG14|PREX1|MAP1LC3B|TICAM1	-0.7
KEGG Pathway	hsa05418	Fluid shear stress and atherosclerosis	-2.7	ACTB|ACTG1|CDH5|DUSP1|FOS|GSTM3|HMOX1|IL1R1|ITGA2B|JUN|MEF2A|MAP3K5|MGST1|MGST2|MGST3|NFE2L2|NOS3|PDGFA|MAPK11|MAPK10|MAP2K6|SDC1|SDC4|TNFRSF1A|TXN|SUMO1|IL1R2|GSTO1|TRPV4	-0.46
KEGG Pathway	hsa04061	Viral protein interaction with cytokine and cytokine receptor	-2.4	CCR1|CSF1R|CXCL2|IL10|IL18|PF4|CCL4|CCL11|CCL25|CXCL6|TNFRSF1A|TNFRSF1B|IL18R1|CCR2	-0.2

## Sheet: Liver-only DSGs
Category	GO	Description	LogP	Hits	Log(q-value)
GO Biological Processes	GO:0044282	small molecule catabolic process	-12	ACADVL|ACOX1|ADH4|AGXT|APOE|ARG1|ASPA|SCARB1|CDO1|CYP1A1|DPYD|GCDH|GCSH|GK|GLUD1|GPT|GSTZ1|HAGH|HAL|HPD|HSD17B4|MGAT1|MTRR|PNP|OTC|PAH|SCP2|SORD|SULT1A1|TAT|TDO2|ACOX2|KMO|ALDH4A1|KYNU|ENTPD4|AASS|RIDA|ECI2|MTHFS|ALDH1L1|HAAO|GLS2|CRYL1|PIPOX|ECHDC2|AGXT2|ACAD11|AFMID|GALM|AMDHD1|UPP2|LDHD	-7.8
GO Biological Processes	GO:0046395	carboxylic acid catabolic process	-11	ACADVL|ACOX1|AGXT|ARG1|ASPA|CDO1|GCDH|GCSH|GLUD1|GPT|GSTZ1|HAL|HPD|HSD17B4|MTRR|OTC|PAH|SCP2|SORD|TAT|TDO2|ACOX2|KMO|ALDH4A1|KYNU|AASS|RIDA|ECI2|MTHFS|ALDH1L1|HAAO|GLS2|CRYL1|PIPOX|ECHDC2|AGXT2|ACAD11|AFMID|AMDHD1|LDHD	-7.2
GO Biological Processes	GO:0016054	organic acid catabolic process	-11	ACADVL|ACOX1|AGXT|ARG1|ASPA|CDO1|GCDH|GCSH|GLUD1|GPT|GSTZ1|HAL|HPD|HSD17B4|MTRR|OTC|PAH|SCP2|SORD|TAT|TDO2|ACOX2|KMO|ALDH4A1|KYNU|AASS|RIDA|ECI2|MTHFS|ALDH1L1|HAAO|GLS2|CRYL1|PIPOX|ECHDC2|AGXT2|ACAD11|AFMID|AMDHD1|LDHD	-7.1
GO Biological Processes	GO:1901605	alpha-amino acid metabolic process	-11	AGXT|ARG1|ASL|ASPA|ASS1|BHMT|CDO1|CPS1|GCDH|GCSH|GLUD1|GPT|GSTZ1|HAL|HNF4A|HPD|MTRR|OTC|PAH|TAT|TDO2|KMO|ALDH4A1|KYNU|AASS|RIDA|MTHFS|SEPHS1|HAAO|BHMT2|GLS2|GNMT|PIPOX|NIT2|AGXT2|AFMID|AMDHD1	-7.1
GO Biological Processes	GO:1901606	alpha-amino acid catabolic process	-10	AGXT|ARG1|ASPA|CDO1|GCSH|GLUD1|GPT|GSTZ1|HPD|MTRR|OTC|PAH|TAT|TDO2|KMO|ALDH4A1|KYNU|AASS|RIDA|HAAO|GLS2|PIPOX|AGXT2|AFMID	-6.8
GO Biological Processes	GO:0009063	amino acid catabolic process	-9.8	AGXT|ARG1|ASPA|CDO1|GCSH|GLUD1|GPT|GSTZ1|HAL|HPD|MTRR|OTC|PAH|TAT|TDO2|KMO|ALDH4A1|KYNU|AASS|RIDA|HAAO|GLS2|PIPOX|AGXT2|AFMID|AMDHD1	-6.5
GO Biological Processes	GO:0032787	monocarboxylic acid metabolic process	-9.4	ACADVL|ACOX1|ADH4|ADH6|AGXT|ALDH1A1|C3|CBR1|CD36|CD74|MAPK14|CYP1A1|CYP1A2|CYP2C18|ACSL1|ACSL4|GAMT|GCDH|GPX4|GSTM1|HAGH|HAL|HPGD|HSD17B4|LIPC|CYP4F3|PAM|PFKFB1|SCP2|SORD|XBP1|ACOX2|KMO|KYNU|FADS2|QKI|ECI2|MTHFS|HAAO|ANGPTL3|PLA2G3|CRYL1|ABHD5|UGT1A6|ACSM5|ECHDC2|OGDHL|AGXT2|ACBD4|HSD3B7|HYI|ADPGK|ACAD11|OSBPL1A|OSBPL9|AMDHD1|LDHD	-6.1
GO Biological Processes	GO:0016053	organic acid biosynthetic process	-8.2	AGXT|ALDH1A1|ASL|ASS1|BHMT|CBR1|CD74|CDO1|CPS1|CYP1A1|CYP1A2|DPYD|GAMT|GLUD1|GPX4|GSTM1|LIPC|MTRR|OTC|PAH|SCP2|UGDH|XBP1|KMO|KYNU|FADS2|QKI|AASS|SEPHS1|HAAO|BHMT2|GLS2|ACSM5|AGXT2|HSD3B7|OSBPL1A|OSBPL9	-4.9
GO Biological Processes	GO:0006956	complement activation	-7.9	CFB|C3|C4BPA|C5|C6|C8B|C9|CLU|CFH|CFI|MASP1|MASP2|C1RL|COLEC11	-4.7
GO Biological Processes	GO:0044283	small molecule biosynthetic process	-7.9	ADK|AGXT|ALDH1A1|ASL|ASS1|BHMT|CBR1|CD74|CDO1|CPS1|CYP1A1|CYP1A2|DPYD|FDPS|SLC37A4|GAMT|GCH1|GLUD1|GPX4|GSTM1|LIPC|MTRR|PNP|NT5E|OTC|PAH|PFKFB1|PPARA|RBP4|SCP2|SORD|TK2|UGDH|XBP1|KMO|KAT2B|KYNU|FADS2|QKI|AASS|SEPHS1|PPIP5K2|HAAO|BHMT2|GLS2|IP6K2|ACSM5|AGXT2|HSD3B7|OSBPL1A|OSBPL9	-4.7
GO Biological Processes	GO:0009074	aromatic amino acid family catabolic process	-7.8	GSTZ1|HPD|PAH|TAT|TDO2|KMO|KYNU|HAAO|AFMID	-4.7
GO Biological Processes	GO:0046394	carboxylic acid biosynthetic process	-7.7	AGXT|ALDH1A1|ASL|ASS1|BHMT|CBR1|CD74|CPS1|CYP1A1|CYP1A2|DPYD|GAMT|GLUD1|GPX4|GSTM1|LIPC|MTRR|OTC|PAH|SCP2|UGDH|XBP1|KMO|KYNU|FADS2|QKI|AASS|SEPHS1|HAAO|BHMT2|GLS2|ACSM5|AGXT2|HSD3B7|OSBPL1A|OSBPL9	-4.7
GO Biological Processes	GO:0030163	protein catabolic process	-7.1	AMBP|APOE|ARRB2|AUP1|BNIP3|CTSC|CLU|CTSH|CLN8|IFI27|MME|PCBP2|DNAJC3|PSMC3|PSMD1|PSMD9|RAD23A|SH3BGRL|PPP1R11|TNFAIP3|HSP90B1|UBB|UBE2B|UBE2D3|UBE2E1|UBE2G1|UBE2H|XBP1|USP7|UBXN8|USP5|CTSF|MTA1|TRIP12|PSMF1|USP34|DPP3|ZMPSTE24|MARCHF6|OGA|YME1L1|CLPX|USP19|ADAMTS13|ATE1|PISD|HERC4|TRPC4AP|FBXO9|USP25|UCHL5|PCYOX1|NUB1|RNF125|RNF130|UGGT1|PCNP|HACE1|RNF123|COP1|RNF128|FBXO31|DCAF11|SHARPIN|ASCC2|Z…	-4
GO Biological Processes	GO:0006520	amino acid metabolic process	-7.1	AGXT|ALDH1A1|ARG1|ASL|ASPA|ASS1|BHMT|CDO1|CPS1|DPYD|GCDH|GCSH|GLUD1|GPT|GSTZ1|HAL|HNF4A|HPD|MTRR|OTC|PAH|TAT|TDO2|KMO|ALDH4A1|KYNU|AASS|RIDA|MTHFS|SEPHS1|HAAO|BHMT2|GLS2|GNMT|PIPOX|NIT2|AGXT2|AFMID|AMDHD1	-4
GO Biological Processes	GO:0015748	organophosphate ester transport	-6.7	APOA1|APOC3|APOE|SCARB1|CD47|SLC37A4|MTTP|SCP2|SLC19A1|C2CD2L|ABCC5|PRELID3A|ATP11A|PRELID3B|PITPNM2|ABCG8|SLC25A32|MFSD2A|OSBPL5|OSBPL10|ATP8B3|ATP11C|ATP9B|TMEM41B	-3.8
GO Biological Processes	GO:0051603	proteolysis involved in protein catabolic process	-6.7	ARRB2|AUP1|CTSC|CTSH|IFI27|PCBP2|DNAJC3|PSMC3|PSMD1|PSMD9|RAD23A|SH3BGRL|PPP1R11|TNFAIP3|HSP90B1|UBB|UBE2B|UBE2D3|UBE2E1|UBE2G1|UBE2H|XBP1|USP7|UBXN8|USP5|CTSF|MTA1|TRIP12|PSMF1|USP34|ZMPSTE24|MARCHF6|YME1L1|CLPX|USP19|ATE1|HERC4|TRPC4AP|FBXO9|USP25|UCHL5|PCYOX1|NUB1|RNF125|RNF130|UGGT1|PCNP|HACE1|RNF123|COP1|RNF128|FBXO31|DCAF11|SHARPIN|ASCC2|ZFAND2A|MVB12A|KLHDC3|AGAP3|ANAPC16|WDR81|CACUL1|STT3…	-3.7
GO Biological Processes	GO:0015914	phospholipid transport	-6.3	APOA1|APOC3|APOE|SCARB1|MTTP|SCP2|C2CD2L|PRELID3A|ATP11A|PRELID3B|PITPNM2|ABCG8|MFSD2A|OSBPL5|OSBPL10|ATP8B3|ATP11C|ATP9B|TMEM41B	-3.4
GO Biological Processes	GO:0043648	dicarboxylic acid metabolic process	-6.3	ASL|ASPA|ASS1|GLUD1|HAL|MTRR|SLC19A1|TAT|KMO|ALDH4A1|KYNU|MTHFS|ALDH1L1|HAAO|GLS2|OGDHL|NIT2|SLC25A32|AMDHD1	-3.4
GO Biological Processes	GO:0006397	mRNA processing	-6.2	DDX5|DHX9|FMR1|FRG1|HNRNPC|HNRNPH3|HNRNPM|NONO|PTBP1|SRSF5|SFSWAP|AKAP17A|THOC5|QKI|RBM39|WTAP|DHX38|DDX46|THRAP3|ALYREF|CELF1|TXNL4A|PAPOLA|RNPS1|CLASRP|XRN2|RALY|KIN|SF3B1|AKAP8L|TRUB2|A1CF|ARL6IP4|LUC7L2|LUC7L3|PRPF39|PRPF38B|SMU1|PRPF40A|LUC7L|MBNL3|PTBP2|RBM26|TENT4B|TSEN34|PPP4R2|CNOT6L|TSEN54	-3.3
GO Biological Processes	GO:0010876	lipid localization	-6.2	APOA1|APOC3|APOE|AUP1|CD36|SCARB1|CHKA|CLU|CLN8|ACSL1|LBP|LIPC|MTTP|SERPINA5|PPARA|RBP4|SCP2|SLCO2A1|SLCO1A2|SLC22A6|C2CD2L|PRELID3A|STARD10|ATP11A|ABCA6|PISD|ANGPTL3|PLA2G3|PRELID3B|PITPNM2|ABCG8|DGAT2|MFSD2A|SLC22A9|OSBPL1A|OSBPL5|OSBPL9|OSBPL10|ATP8B3|ATP11C|ATP9B|TMEM41B	-3.3
GO Biological Processes	GO:0006958	complement activation, classical pathway	-6	C3|C4BPA|C5|C6|C8B|C9|CLU|CFI|MASP2|C1RL	-3.2
GO Biological Processes	GO:1901361	organic cyclic compound catabolic process	-6	AMBP|APOE|SCARB1|CYP1A1|CYP1A2|DDX5|DPYD|GSTZ1|HPD|EIF3E|MAOA|MAOB|MGAT1|PNP|NT5E|PAH|RNH1|TAT|TDO2|KMO|SUCLG2|SUCLG1|KYNU|ENTPD4|THRAP3|RIDA|MTHFS|ALDH1L1|RNPS1|TREX2|XRN2|HAAO|SND1|TENT4B|EDC3|FBH1|AFMID|UPP2|CNOT6L|ENTPD8	-3.1
GO Biological Processes	GO:0043484	regulation of RNA splicing	-5.9	CLK1|CLK2|DDX5|FMR1|HNRNPH3|PTBP1|SRSF5|SFSWAP|TAF9|FXR1|AKAP17A|KAT2B|QKI|RBM39|WTAP|THRAP3|RBM12|CELF1|RNPS1|DAZAP1|RBM47|SMU1|SUPT20H|MBNL3|PCBP4|PTBP2|CCNL2	-3.1
GO Biological Processes	GO:0009072	aromatic amino acid metabolic process	-5.9	GCDH|GSTZ1|HPD|PAH|TAT|TDO2|KMO|KYNU|HAAO|AFMID	-3.1
GO Biological Processes	GO:0008652	amino acid biosynthetic process	-5.9	AGXT|ALDH1A1|ASL|ASS1|BHMT|CPS1|DPYD|GLUD1|MTRR|OTC|PAH|AASS|SEPHS1|BHMT2|GLS2|AGXT2	-3.1
GO Biological Processes	GO:0044265	cellular macromolecule catabolic process	-5.9	ARRB2|AUP1|DDX5|CLN8|IFI27|EIF3E|PCBP2|PSMC3|PSMD1|PSMD9|RAD23A|RNH1|SH3BGRL|PPP1R11|TNFAIP3|HSP90B1|UBB|UBE2B|UBE2D3|UBE2E1|UBE2G1|UBE2H|XBP1|USP7|UBXN8|USP5|MTA1|TRIP12|PSMF1|USP34|THRAP3|RIDA|ZMPSTE24|MARCHF6|OGA|USP19|RNPS1|ATE1|TREX2|XRN2|HERC4|TRPC4AP|FBXO9|SND1|USP25|UCHL5|PCYOX1|NUB1|RNF125|RNF130|PCNP|HACE1|TENT4B|COP1|RNF128|FBXO31|EDC3|DCAF11|SHARPIN|ASCC2|FBH1|ZFAND2A|MVB12A|KLHDC3|AG…	-3.1
GO Biological Processes	GO:0019439	aromatic compound catabolic process	-5.8	AMBP|CYP1A1|DDX5|DPYD|GSTZ1|HPD|EIF3E|MAOA|MAOB|MGAT1|PNP|NT5E|PAH|PON2|RNH1|TAT|TDO2|KMO|SUCLG2|SUCLG1|KYNU|ENTPD4|THRAP3|RIDA|MTHFS|ALDH1L1|RNPS1|TREX2|XRN2|HAAO|SND1|TENT4B|EDC3|FBH1|AFMID|UPP2|CNOT6L|ENTPD8	-3.1
GO Biological Processes	GO:0042730	fibrinolysis	-5.8	F2|FGA|FGB|FGG|HRG|KLKB1|PLG|PROS1	-3.1
GO Biological Processes	GO:0042572	retinol metabolic process	-5.8	ADH4|ADH6|ALDH1A1|CYP1A1|CYP1A2|CYP2C18|RBP4|DHRS3|RDH11|DHRS7|DGAT2	-3.1
GO Biological Processes	GO:0008380	RNA splicing	-5.6	DDX5|DHX9|FMR1|FRG1|HNRNPC|HNRNPH3|HNRNPM|NONO|PTBP1|SRSF5|SFSWAP|AKAP17A|THOC5|QKI|RBM39|WTAP|DHX38|DDX46|THRAP3|ALYREF|CELF1|TXNL4A|RNPS1|CLASRP|RALY|SF3B1|AKAP8L|ARL6IP4|LUC7L2|LUC7L3|PRPF39|PRPF38B|SMU1|PRPF40A|LUC7L|MBNL3|PTBP2|TSEN34|ZCRB1|PPP4R2|TSEN54	-2.9
GO Biological Processes	GO:0002455	humoral immune response mediated by circulating immunoglobulin	-5.5	C3|C4BPA|C5|C6|C8B|C9|CLU|CFI|MASP2|C1RL	-2.9
GO Biological Processes	GO:0006631	fatty acid metabolic process	-5.5	ACADVL|ACOX1|ADH4|C3|CBR1|CD36|CD74|MAPK14|CYP1A1|CYP1A2|CYP2C18|ACSL1|ACSL4|GCDH|GPX4|GSTM1|HPGD|HSD17B4|LIPC|CYP4F3|PAM|SCP2|XBP1|ACOX2|FADS2|QKI|ECI2|ANGPTL3|PLA2G3|CRYL1|ABHD5|ACSM5|ECHDC2|ACBD4|ACAD11	-2.9
GO Biological Processes	GO:0030195	negative regulation of blood coagulation	-5.5	APOE|F2|FGA|FGB|FGG|HRG|KLKB1|KNG1|PLG|PROC|PROS1|VTN	-2.9
GO Biological Processes	GO:0019627	urea metabolic process	-5.5	ARG1|ASL|ASS1|CPS1|OTC|SLC25A15	-2.9
GO Biological Processes	GO:0071941	nitrogen cycle metabolic process	-5.5	ARG1|ASL|ASS1|CPS1|OTC|SLC25A15	-2.9
GO Biological Processes	GO:0006568	tryptophan metabolic process	-5.5	GCDH|TDO2|KMO|KYNU|HAAO|AFMID	-2.9
GO Biological Processes	GO:0000050	urea cycle	-5.5	ARG1|ASL|ASS1|CPS1|OTC|SLC25A15	-2.9
GO Biological Processes	GO:0030193	regulation of blood coagulation	-5.4	APOE|CD36|F2|FGA|FGB|FGG|HRG|KLKB1|KNG1|PLAUR|PLG|PROC|PROS1|ST3GAL4|VTN	-2.8
GO Biological Processes	GO:0006953	acute-phase response	-5.4	A2M|AHSG|ASS1|F2|FN1|ITIH4|LBP|ORM1|SERPINA1	-2.8
GO Biological Processes	GO:0070328	triglyceride homeostasis	-5.4	APOA1|APOC3|APOE|SCARB1|HNF4A|LIPC|XBP1|ANGPTL3|ABCG8|DGAT2	-2.8
GO Biological Processes	GO:0055090	acylglycerol homeostasis	-5.4	APOA1|APOC3|APOE|SCARB1|HNF4A|LIPC|XBP1|ANGPTL3|ABCG8|DGAT2	-2.8
GO Biological Processes	GO:0043632	modification-dependent macromolecule catabolic process	-5.3	ARRB2|AUP1|IFI27|PCBP2|PSMC3|PSMD1|PSMD9|RAD23A|SH3BGRL|PPP1R11|TNFAIP3|HSP90B1|UBB|UBE2B|UBE2D3|UBE2E1|UBE2G1|UBE2H|XBP1|USP7|UBXN8|USP5|MTA1|TRIP12|PSMF1|USP34|ZMPSTE24|MARCHF6|USP19|ATE1|HERC4|TRPC4AP|FBXO9|USP25|UCHL5|PCYOX1|NUB1|RNF125|RNF130|PCNP|HACE1|TENT4B|COP1|RNF128|FBXO31|DCAF11|SHARPIN|ASCC2|ZFAND2A|MVB12A|KLHDC3|AGAP3|ANAPC16|WDR81|CACUL1|STT3B|ZNRF2|SPOPL	-2.8
GO Biological Processes	GO:1900047	negative regulation of hemostasis	-5.3	APOE|F2|FGA|FGB|FGG|HRG|KLKB1|KNG1|PLG|PROC|PROS1|VTN	-2.8
GO Biological Processes	GO:0006869	lipid transport	-5.3	APOA1|APOC3|APOE|CD36|SCARB1|CHKA|CLU|CLN8|ACSL1|LBP|LIPC|MTTP|SERPINA5|RBP4|SCP2|SLCO2A1|SLCO1A2|SLC22A6|C2CD2L|PRELID3A|STARD10|ATP11A|ABCA6|PLA2G3|PRELID3B|PITPNM2|ABCG8|MFSD2A|SLC22A9|OSBPL1A|OSBPL5|OSBPL9|OSBPL10|ATP8B3|ATP11C|ATP9B|TMEM41B	-2.8
GO Biological Processes	GO:0019941	modification-dependent protein catabolic process	-5.3	ARRB2|AUP1|IFI27|PCBP2|PSMC3|PSMD1|PSMD9|RAD23A|SH3BGRL|PPP1R11|TNFAIP3|HSP90B1|UBB|UBE2B|UBE2D3|UBE2E1|UBE2G1|UBE2H|XBP1|USP7|UBXN8|USP5|MTA1|TRIP12|PSMF1|USP34|ZMPSTE24|MARCHF6|USP19|ATE1|HERC4|TRPC4AP|FBXO9|USP25|UCHL5|PCYOX1|NUB1|RNF125|RNF130|PCNP|HACE1|COP1|RNF128|FBXO31|DCAF11|SHARPIN|ASCC2|ZFAND2A|MVB12A|KLHDC3|AGAP3|ANAPC16|WDR81|CACUL1|STT3B|ZNRF2|SPOPL	-2.8
GO Biological Processes	GO:1900046	regulation of hemostasis	-5.2	APOE|CD36|F2|FGA|FGB|FGG|HRG|KLKB1|KNG1|PLAUR|PLG|PROC|PROS1|ST3GAL4|VTN	-2.7
GO Biological Processes	GO:0016071	mRNA metabolic process	-5.1	DDX5|DHX9|FMR1|FRG1|HNRNPC|HNRNPH3|EIF3E|HNRNPM|NONO|PCBP2|PTBP1|RNASE4|RNH1|SRSF5|SFSWAP|TAF9|AKAP17A|THOC5|QKI|RBM39|WTAP|DHX38|DDX46|THRAP3|ALYREF|RIDA|CELF1|TXNL4A|PAPOLA|RNPS1|CLASRP|XRN2|RALY|KIN|SF3B1|AKAP8L|TRUB2|SND1|A1CF|ARL6IP4|LUC7L2|LUC7L3|PRPF39|PRPF38B|SMU1|PRPF40A|LUC7L|MBNL3|PTBP2|RBM26|TENT4B|TSEN34|EDC3|PUS3|PPP4R2|CNOT6L|TSEN54	-2.6
GO Biological Processes	GO:0050819	negative regulation of coagulation	-5.1	APOE|F2|FGA|FGB|FGG|HRG|KLKB1|KNG1|PLG|PROC|PROS1|VTN	-2.6
GO Biological Processes	GO:0006586	indolalkylamine metabolic process	-5.1	GCDH|TDO2|KMO|KYNU|HAAO|AFMID	-2.6
GO Biological Processes	GO:1901607	alpha-amino acid biosynthetic process	-5.1	AGXT|ASL|ASS1|BHMT|CPS1|GLUD1|MTRR|OTC|PAH|AASS|SEPHS1|BHMT2|GLS2|AGXT2	-2.6
GO Biological Processes	GO:0050818	regulation of coagulation	-5.1	APOE|CD36|F2|FGA|FGB|FGG|HRG|KLKB1|KNG1|PLAUR|PLG|PROC|PROS1|ST3GAL4|VTN	-2.6
GO Biological Processes	GO:0034381	plasma lipoprotein particle clearance	-4.9	APOA1|APOC3|APOE|CD36|SCARB1|LIPA|LIPC|DGAT2	-2.5
GO Biological Processes	GO:0006569	tryptophan catabolic process	-4.8	TDO2|KMO|KYNU|HAAO|AFMID	-2.4
GO Biological Processes	GO:0042436	indole-containing compound catabolic process	-4.8	TDO2|KMO|KYNU|HAAO|AFMID	-2.4
GO Biological Processes	GO:0006959	humoral immune response	-4.7	CFB|C3|C4BPA|C5|C6|C8B|C9|CLU|F2|FGA|FGB|CFH|HRG|CFI|MASP1|TF|MASP2|C1RL|COLEC11	-2.3
GO Biological Processes	GO:0006575	cellular modified amino acid metabolic process	-4.7	ASS1|BHMT|GAMT|GCH1|GPX4|GSTA2|GSTM1|GSTZ1|HAGH|MTRR|SLC1A2|SLC19A1|ALDH4A1|MTHFS|ALDH1L1|BHMT2|GNMT|PLA2G3|PCYOX1|SLC25A32|OSBPL5|OSBPL10	-2.2
GO Biological Processes	GO:0006511	ubiquitin-dependent protein catabolic process	-4.6	ARRB2|AUP1|IFI27|PCBP2|PSMC3|PSMD1|PSMD9|RAD23A|SH3BGRL|PPP1R11|TNFAIP3|HSP90B1|UBE2B|UBE2D3|UBE2E1|UBE2G1|UBE2H|XBP1|USP7|UBXN8|USP5|MTA1|TRIP12|PSMF1|USP34|MARCHF6|USP19|ATE1|HERC4|TRPC4AP|FBXO9|USP25|UCHL5|NUB1|RNF125|RNF130|PCNP|HACE1|COP1|RNF128|FBXO31|DCAF11|SHARPIN|ASCC2|ZFAND2A|MVB12A|KLHDC3|AGAP3|ANAPC16|WDR81|CACUL1|STT3B|ZNRF2|SPOPL	-2.2
GO Biological Processes	GO:0043691	reverse cholesterol transport	-4.5	APOA1|APOC3|APOE|SCARB1|CLU|LIPC	-2.1
GO Biological Processes	GO:0006957	complement activation, alternative pathway	-4.5	CFB|C3|C5|C8B|C9|CFH	-2.1
GO Biological Processes	GO:0034375	high-density lipoprotein particle remodeling	-4.5	APOA1|APOC3|APOE|SCARB1|LIPC|PLA2G3	-2.1
GO Biological Processes	GO:0097006	regulation of plasma lipoprotein particle levels	-4.4	APOA1|APOC3|APOE|CD36|SCARB1|LIPA|LIPC|MTTP|PLA2G3|DGAT2|MFSD2A	-2.1
GO Biological Processes	GO:0061045	negative regulation of wound healing	-4.4	APOE|CRK|F2|FGA|FGB|FGG|HRG|KLKB1|KNG1|PLG|PROC|PROS1|VTN	-2
GO Biological Processes	GO:0006721	terpenoid metabolic process	-4.3	ADH4|ADH6|ALDH1A1|CYP1A1|CYP1A2|CYP2C18|FDPS|RBP4|DHRS3|GGPS1|RDH11|DHRS7|DGAT2	-1.9
GO Biological Processes	GO:0035461	vitamin transmembrane transport	-4.3	SCARB1|GC|SLC19A1|SLC5A6|ABCC5|SLC47A1|SLC25A32	-1.9
GO Biological Processes	GO:0009308	amine metabolic process	-4.2	CYP1A1|DHPS|GCDH|GCH1|MAOA|MAOB|OAZ1|PAH|SULT1A1|TDO2|KMO|KYNU|HAAO|GDE1|AFMID	-1.9
GO Biological Processes	GO:0034201	response to oleic acid	-4.2	ASS1|CPS1|ACSL1|DGAT2	-1.9
GO Biological Processes	GO:0120254	olefinic compound metabolic process	-4.2	ADH4|ADH6|ALDH1A1|CBR1|CYP1A1|CYP1A2|CYP2C18|GPX4|CYP4F3|RBP4|SCP2|DHRS3|FADS2|RDH11|DHRS7|DGAT2	-1.8
GO Biological Processes	GO:0033762	response to glucagon	-4.1	ARG1|ASS1|CDO1|CPS1|GCGR|PFKFB1|STK11	-1.8
GO Biological Processes	GO:0034308	primary alcohol metabolic process	-4	ADH4|ADH6|ALDH1A1|CYP1A1|CYP1A2|CYP2C18|RBP4|SULT1A1|DHRS3|RDH11|GDE1|DHRS7|DGAT2	-1.7
GO Biological Processes	GO:0006576	biogenic amine metabolic process	-4	DHPS|GCDH|GCH1|MAOA|MAOB|OAZ1|PAH|SULT1A1|TDO2|KMO|KYNU|HAAO|GDE1|AFMID	-1.7
GO Biological Processes	GO:0034369	plasma lipoprotein particle remodeling	-3.9	APOA1|APOC3|APOE|SCARB1|LIPC|MTTP|PLA2G3	-1.6
GO Biological Processes	GO:0034368	protein-lipid complex remodeling	-3.9	APOA1|APOC3|APOE|SCARB1|LIPC|MTTP|PLA2G3	-1.6
GO Biological Processes	GO:0061041	regulation of wound healing	-3.9	APOE|CD36|CRK|F2|FGA|FGB|FGG|HRG|KLKB1|KNG1|PLAUR|PLG|PROC|PROS1|ST3GAL4|TNFAIP3|VTN|XBP1	-1.6
GO Biological Processes	GO:1903035	negative regulation of response to wounding	-3.9	APOE|CRK|F2|FGA|FGB|FGG|HRG|KLKB1|KNG1|PLG|PROC|PROS1|VTN|CERS2	-1.6
GO Biological Processes	GO:0006111	regulation of gluconeogenesis	-3.9	CLK2|GPT|NR3C1|PDK2|PPARA|STK11|USP7|KAT2B|GNMT|DGAT2	-1.6
GO Biological Processes	GO:0001523	retinoid metabolic process	-3.9	ADH4|ADH6|ALDH1A1|CYP1A1|CYP1A2|CYP2C18|RBP4|DHRS3|RDH11|DHRS7|DGAT2	-1.6
GO Biological Processes	GO:0009064	glutamine family amino acid metabolic process	-3.9	ARG1|ASL|ASS1|CPS1|GLUD1|HAL|OTC|TAT|ALDH4A1|MTHFS|GLS2|NIT2|AMDHD1	-1.6
GO Biological Processes	GO:0051917	regulation of fibrinolysis	-3.8	F2|HRG|KLKB1|PLAUR|PLG|VTN	-1.5
GO Biological Processes	GO:0046700	heterocycle catabolic process	-3.8	AMBP|CYP1A1|DDX5|DPYD|EIF3E|MGAT1|PNP|NT5E|RNH1|TDO2|KMO|SUCLG2|SUCLG1|KYNU|ENTPD4|THRAP3|RIDA|MTHFS|ALDH1L1|RNPS1|TREX2|XRN2|HAAO|SND1|TENT4B|EDC3|FBH1|AFMID|UPP2|CNOT6L|ENTPD8	-1.5
GO Biological Processes	GO:0071825	protein-lipid complex subunit organization	-3.7	BIN1|APOA1|APOC3|APOE|SCARB1|LIPC|MTTP|PLA2G3|MFSD2A	-1.5
GO Biological Processes	GO:0034354	'de novo' NAD biosynthetic process from tryptophan	-3.7	KMO|KYNU|HAAO|AFMID	-1.5
GO Biological Processes	GO:0010906	regulation of glucose metabolic process	-3.7	CLK2|GPLD1|GPT|NR3C1|PDK2|PFKFB1|PHKG2|PPARA|STK11|USP7|KAT2B|ZMPSTE24|GNMT|DGAT2|SLC45A3	-1.5
GO Biological Processes	GO:0006720	isoprenoid metabolic process	-3.7	ADH4|ADH6|ALDH1A1|CYP1A1|CYP1A2|CYP2C18|DPAGT1|FDPS|RBP4|DHRS3|GGPS1|RDH11|DHRS7|DGAT2	-1.5
GO Biological Processes	GO:0044270	cellular nitrogen compound catabolic process	-3.7	AMBP|BHMT|DDX5|DPYD|EIF3E|MGAT1|PNP|NT5E|RNH1|TDO2|KMO|SUCLG2|SUCLG1|KYNU|ENTPD4|THRAP3|RIDA|MTHFS|ALDH1L1|RNPS1|TREX2|XRN2|HAAO|SND1|TENT4B|EDC3|FBH1|AFMID|UPP2|CNOT6L|ENTPD8	-1.5
GO Biological Processes	GO:0043420	anthranilate metabolic process	-3.7	KMO|KYNU|HAAO	-1.4
GO Biological Processes	GO:0019805	quinolinate biosynthetic process	-3.7	KMO|KYNU|HAAO	-1.4
GO Biological Processes	GO:0071400	cellular response to oleic acid	-3.7	ASS1|CPS1|DGAT2	-1.4
GO Biological Processes	GO:0034367	protein-containing complex remodeling	-3.7	APOA1|APOC3|APOE|SCARB1|LIPC|MTTP|PLA2G3	-1.4
GO Biological Processes	GO:0010043	response to zinc ion	-3.6	ARG1|ASS1|CPS1|KHK|OTC|PAM|SLC30A2|HAAO|SLC30A10	-1.4
GO Biological Processes	GO:0050684	regulation of mRNA processing	-3.6	DDX5|DHX9|FMR1|PTBP1|SFSWAP|FXR1|QKI|RBM39|WTAP|THRAP3|CELF1|PAPOLA|RNPS1|CPEB3|DAZAP1|RBM47|SMU1|PCBP4	-1.4
GO Biological Processes	GO:0016101	diterpenoid metabolic process	-3.6	ADH4|ADH6|ALDH1A1|CYP1A1|CYP1A2|CYP2C18|RBP4|DHRS3|RDH11|DHRS7|DGAT2	-1.4
GO Biological Processes	GO:0006536	glutamate metabolic process	-3.6	ASL|GLUD1|HAL|TAT|ALDH4A1|MTHFS|GLS2|AMDHD1	-1.4
GO Biological Processes	GO:0010498	proteasomal protein catabolic process	-3.6	ARRB2|AUP1|IFI27|PCBP2|PSMC3|PSMD1|RAD23A|SH3BGRL|HSP90B1|UBE2B|UBE2D3|UBE2G1|UBE2H|XBP1|UBXN8|MTA1|TRIP12|PSMF1|MARCHF6|USP19|ATE1|TRPC4AP|FBXO9|UGGT1|PCNP|COP1|FBXO31|DCAF11|SHARPIN|ASCC2|ZFAND2A|KLHDC3|AGAP3|ANAPC16|STT3B|ZNRF2|SPOPL	-1.4
GO Biological Processes	GO:0055088	lipid homeostasis	-3.6	ACOX1|APOA1|APOC3|APOE|SCARB1|CLN8|HNF4A|LIPC|MTTP|XBP1|ACOX2|RALY|ANGPTL3|ABHD5|RTN4|ABHD4|ABCG8|DGAT2|TLCD2	-1.4
GO Biological Processes	GO:0007596	blood coagulation	-3.6	CD36|MAPK14|F2|F5|F13B|FGA|FGB|FGG|GNAS|HGFAC|HNF4A|HRG|KLKB1|KNG1|SERPINA1|PLAUR|PLG|PROC|PROS1|PROZ|ADAMTS13	-1.4
GO Biological Processes	GO:0050817	coagulation	-3.6	CD36|MAPK14|F2|F5|F13B|FGA|FGB|FGG|GNAS|HGFAC|HNF4A|HRG|KLKB1|KNG1|SERPINA1|PLAUR|PLG|PROC|PROS1|PROZ|ADAMTS13	-1.4
GO Biological Processes	GO:0048024	regulation of mRNA splicing, via spliceosome	-3.6	DDX5|FMR1|PTBP1|SFSWAP|FXR1|QKI|RBM39|WTAP|THRAP3|CELF1|RNPS1|DAZAP1|RBM47|SMU1|PCBP4	-1.4
GO Biological Processes	GO:0043650	dicarboxylic acid biosynthetic process	-3.6	GLUD1|KMO|KYNU|HAAO|GLS2	-1.4
GO Biological Processes	GO:1903034	regulation of response to wounding	-3.5	APOE|CD36|CRK|F2|FGA|FGB|FGG|HRG|KLKB1|KNG1|PLAUR|PLG|PROC|PROS1|ST3GAL4|TNFAIP3|VTN|XBP1|STK24|CERS2	-1.4
GO Biological Processes	GO:0006376	mRNA splice site selection	-3.5	SRSF5|SFSWAP|CELF1|LUC7L2|LUC7L3|PRPF39|LUC7L|PTBP2	-1.4
GO Biological Processes	GO:0015918	sterol transport	-3.5	APOA1|APOC3|APOE|CD36|SCARB1|CLU|LIPC|MTTP|ABCG8|OSBPL1A|OSBPL5|OSBPL9|OSBPL10	-1.3
GO Biological Processes	GO:0006066	alcohol metabolic process	-3.5	ADH4|ADH6|ALDH1A1|APOA1|APOE|SCARB1|CYP1A1|CYP1A2|CYP2C18|DPAGT1|CLN8|FDPS|GCH1|GK|IDH3G|LIPC|NFE2L1|RBP4|SORD|SULT1A1|DHRS3|PPIP5K2|ANGPTL3|RDH11|IP6K2|GDE1|DHRS7|DGAT2|OSBPL1A|OSBPL5	-1.3
GO Biological Processes	GO:1901615	organic hydroxy compound metabolic process	-3.5	ADH4|ADH6|ALDH1A1|APOA1|APOE|SCARB1|CYP1A1|CYP1A2|CYP2C18|DPAGT1|CLN8|FDPS|GC|GCH1|GK|HAGH|IDH3G|LIPA|LIPC|MAOA|MAOB|NFE2L1|PAH|RBP4|SCP2|SORD|SULT1A1|DHRS3|PPIP5K2|ANGPTL3|RDH11|IP6K2|GDE1|DHRS7|HSD3B7|DGAT2|OSBPL1A|OSBPL5|OSBPL9|LDHD	-1.3
GO Biological Processes	GO:0009066	aspartate family amino acid metabolic process	-3.5	ASPA|ASS1|BHMT|MTRR|AASS|RIDA|BHMT2|GNMT|PIPOX|NIT2	-1.3
GO Biological Processes	GO:0007599	hemostasis	-3.4	CD36|MAPK14|F2|F5|F13B|FGA|FGB|FGG|GNAS|HGFAC|HNF4A|HRG|KLKB1|KNG1|SERPINA1|PLAUR|PLG|PROC|PROS1|PROZ|ADAMTS13	-1.3
GO Biological Processes	GO:0006558	L-phenylalanine metabolic process	-3.4	GSTZ1|HPD|PAH|TAT	-1.3
GO Biological Processes	GO:0034627	'de novo' NAD biosynthetic process	-3.4	KMO|KYNU|HAAO|AFMID	-1.3
GO Biological Processes	GO:1902221	erythrose 4-phosphate/phosphoenolpyruvate family amino acid metabolic process	-3.4	GSTZ1|HPD|PAH|TAT	-1.3
GO Biological Processes	GO:0006559	L-phenylalanine catabolic process	-3.4	GSTZ1|HPD|PAH|TAT	-1.3
GO Biological Processes	GO:1902222	erythrose 4-phosphate/phosphoenolpyruvate family amino acid catabolic process	-3.4	GSTZ1|HPD|PAH|TAT	-1.3
GO Biological Processes	GO:0051180	vitamin transport	-3.4	APOA1|SCARB1|GC|SLC19A1|TCN2|SLC5A6|ABCC5|SLC47A1|SLC25A32	-1.3
GO Biological Processes	GO:0045861	negative regulation of proteolysis	-3.4	A2M|AHSG|AMBP|BIN1|ARRB2|SERPINA6|CLN8|F2|HRG|ITIH2|ITIH3|ITIH4|KNG1|SERPINA5|SERPINA1|PLAUR|PTPN3|TAF9|VTN|USP7|PICALM|PSMF1|TLK2|FETUB|USP25|UCHL5|PIH1D1|MARCHF7	-1.3
GO Biological Processes	GO:0042178	xenobiotic catabolic process	-3.4	CRYZ|CYP1A1|CYP1A2|ACSL1|GSTM1	-1.2
GO Biological Processes	GO:0006805	xenobiotic metabolic process	-3.3	CBR1|CRYZ|CYP1A1|CYP1A2|CYP2C18|SLC29A1|ACSL1|GSTA2|GSTM1|HNF4A|SULT1A1|ABCC5|UGT1A6	-1.2
GO Biological Processes	GO:0015711	organic anion transport	-3.3	AGXT|CACNB4|CD36|CD47|SLC26A2|CLN8|MTTP|SLC1A2|SLC4A2|SLC7A2|SLC19A1|SLCO2A1|SLCO1A2|SLC5A6|SLC22A6|ABCC5|SLC25A15|SLC35A1|SLC38A3|PLA2G3|SLC35C2|SLC38A4|SLC47A1|SLC2A9|SLC25A32|MFSD2A|SFXN1|SLC22A9|SLC26A8|SLC36A4	-1.2
GO Biological Processes	GO:0043161	proteasome-mediated ubiquitin-dependent protein catabolic process	-3.3	ARRB2|AUP1|IFI27|PCBP2|PSMC3|PSMD1|RAD23A|SH3BGRL|HSP90B1|UBE2B|UBE2D3|UBE2G1|UBE2H|UBXN8|MTA1|TRIP12|PSMF1|MARCHF6|USP19|TRPC4AP|FBXO9|PCNP|COP1|FBXO31|DCAF11|SHARPIN|ASCC2|ZFAND2A|KLHDC3|AGAP3|ANAPC16|STT3B|ZNRF2|SPOPL	-1.2
GO Biological Processes	GO:0001676	long-chain fatty acid metabolic process	-3.3	CBR1|CYP1A1|CYP1A2|CYP2C18|ACSL1|ACSL4|GPX4|GSTM1|CYP4F3|PAM|SCP2|FADS2|QKI	-1.2
GO Biological Processes	GO:0000381	regulation of alternative mRNA splicing, via spliceosome	-3.2	DDX5|FMR1|PTBP1|FXR1|WTAP|THRAP3|CELF1|RNPS1|RBM47|SMU1	-1.1
GO Biological Processes	GO:0010907	positive regulation of glucose metabolic process	-3.2	GPLD1|GPT|PHKG2|PPARA|STK11|KAT2B|DGAT2|SLC45A3	-1.1
GO Biological Processes	GO:0071827	plasma lipoprotein particle organization	-3.2	APOA1|APOC3|APOE|SCARB1|LIPC|MTTP|PLA2G3|MFSD2A	-1.1
GO Biological Processes	GO:0090207	regulation of triglyceride metabolic process	-3.2	APOC3|APOE|C3|SCARB1|GPLD1|ABHD5|DGAT2|MFSD2A	-1.1
GO Biological Processes	GO:0042430	indole-containing compound metabolic process	-3.2	GCDH|TDO2|KMO|KYNU|HAAO|AFMID	-1.1
GO Biological Processes	GO:0009084	glutamine family amino acid biosynthetic process	-3.2	ASL|ASS1|GLUD1|OTC|GLS2	-1.1
GO Biological Processes	GO:0072376	protein activation cascade	-3.2	F13B|FGA|FGB|FGG|KLKB1	-1.1
GO Biological Processes	GO:0033559	unsaturated fatty acid metabolic process	-3.1	ACOX1|CBR1|CD74|CYP1A1|CYP1A2|CYP2C18|GPX4|GSTM1|HPGD|CYP4F3|SCP2|FADS2	-1.1
GO Biological Processes	GO:0031347	regulation of defense response	-3.1	A2M|AHSG|APOA1|APOE|ARG1|ARRB2|C3|CD1D|CD36|CD47|CTSC|CRK|MAPK14|DHX9|GPX4|CFH|HPX|IRAK2|KLKB1|LBP|LGALS1|LGALS9|NONO|NT5E|PCBP2|PPARA|PPM1B|MAPK3|PROC|STAT1|VAMP7|TNFAIP3|ZMPSTE24|CELF1|CDK19|GRAMD4|CADM1|LSM14A|RABGEF1|PLA2G3|RBM47|TRIM44|RNF125|LGR4|RTN4|MAVS|COLEC11|SETD6|SHARPIN|MACIR|PIK3AP1	-1.1
GO Biological Processes	GO:0060760	positive regulation of response to cytokine stimulus	-3.1	CD74|DHX9|HPX|ADAM17|TAF9|AGPAT2|LSM14A|RBM47|TRIM44|MAVS	-1
GO Biological Processes	GO:0070936	protein K48-linked ubiquitination	-3.1	IFI27|TNFAIP3|UBE2B|UBE2D3|UBE2E1|UBE2G1|UBE2H|MARCHF6|UBE2E3|HACE1|ZNRF2	-1
GO Biological Processes	GO:0042853	L-alanine catabolic process	-3.1	AGXT|GPT|AGXT2	-1
GO Biological Processes	GO:0006526	arginine biosynthetic process	-3.1	ASL|ASS1|OTC	-1
GO Biological Processes	GO:0042851	L-alanine metabolic process	-3.1	AGXT|GPT|AGXT2	-1
GO Biological Processes	GO:0046874	quinolinate metabolic process	-3.1	KMO|KYNU|HAAO	-1
GO Biological Processes	GO:0071830	triglyceride-rich lipoprotein particle clearance	-3.1	APOC3|APOE|LIPC	-1
GO Biological Processes	GO:0034382	chylomicron remnant clearance	-3.1	APOC3|APOE|LIPC	-1
GO Biological Processes	GO:0009435	NAD biosynthetic process	-3	KMO|KYNU|HAAO|NMRK1|NAXD|AFMID	-1
GO Biological Processes	GO:0045087	innate immune response	-3	ARG1|ASS1|CFB|C3|C4BPA|C5|C6|C8B|C9|CD1D|CD47|CD74|CLU|DHX9|FGA|FGB|GCH1|CFH|HPX|CFI|IFI27|IL1RAP|LBP|LGALS9|CIITA|NONO|PCBP2|MASP1|STAT1|VAMP7|ADAM15|KYNU|G3BP2|G3BP1|CNPY3|MASP2|ADAMTS13|FBXO9|CRCP|C1RL|NUB1|SHFL|LGR4|WRNIP1|MAVS|COLEC11	-1
GO Biological Processes	GO:0002526	acute inflammatory response	-3	A2M|AHSG|ASS1|F2|FN1|ITIH4|KLKB1|LBP|ORM1|SERPINA1	-0.99
GO Biological Processes	GO:0043605	amide catabolic process	-3	HAL|TDO2|AASS|PIPOX|AMDHD1	-0.98
GO Biological Processes	GO:0042632	cholesterol homeostasis	-3	APOA1|APOC3|APOE|SCARB1|HNF4A|LIPC|MTTP|XBP1|RALY|ANGPTL3|ABCG8|DGAT2	-0.96
GO Biological Processes	GO:0051604	protein maturation	-3	CTSH|DHPS|F13B|FGA|FGB|FGG|GCSH|HGFAC|KLKB1|MME|P4HB|MASP1|REN|ADAM17|KAT2B|RCE1|ZMPSTE24|YME1L1|ADAMTS13|SEC11A|PISD|SPCS1|NAA20|C1RL|NAA35|NAA60|SEC11C	-0.95
GO Biological Processes	GO:0055092	sterol homeostasis	-2.9	APOA1|APOC3|APOE|SCARB1|HNF4A|LIPC|MTTP|XBP1|RALY|ANGPTL3|ABCG8|DGAT2	-0.91
GO Biological Processes	GO:0006591	ornithine metabolic process	-2.9	ARG1|ASL|HNF4A|OTC	-0.88
GO Biological Processes	GO:0031639	plasminogen activation	-2.9	FGA|FGB|FGG|KLKB1	-0.88
GO Biological Processes	GO:0071377	cellular response to glucagon stimulus	-2.9	ARG1|ASS1|CPS1|GCGR	-0.88
GO Biological Processes	GO:0006790	sulfur compound metabolic process	-2.9	AGXT|BHMT|CDO1|CPS1|ACSL1|ACSL4|GCDH|GHR|GPX4|GSTA2|GSTM1|GSTZ1|HAGH|HSD17B4|NDST1|HYAL1|MTRR|ST3GAL4|SLC1A2|SULT1A1|TDO2|UGDH|SUCLG2|SUCLG1|AASS|BHMT2|GNMT|PIPOX|ACSM5|SQOR|DGAT2	-0.88
GO Biological Processes	GO:0000096	sulfur amino acid metabolic process	-2.9	AGXT|BHMT|CDO1|CPS1|MTRR|BHMT2|GNMT	-0.86
GO Biological Processes	GO:0009617	response to bacterium	-2.8	ARG1|ASS1|BNIP3|C3|C4BPA|CD1D|CD36|SCARB1|CPS1|MAPK14|CYP1A1|F2|FGA|FGB|FGFR2|GCH1|HPGD|IRAK2|LBP|LGALS9|MAOB|NFIB|MAPK3|MAP2K7|REN|RNASE4|ADAM17|PPP1R11|TF|TNFAIP3|XBP1|KMO|ADAM9|ADAMTS13|CDK19|STAB1|CYRIB|STAB2|MAVS|SHARPIN|MTDH	-0.86
GO Biological Processes	GO:0015849	organic acid transport	-2.8	AGXT|APOE|CACNB4|CD36|SLC26A2|CLN8|ACSL1|SLC1A2|SLC7A2|SLC19A1|SLCO1A2|SLC5A6|SLC22A6|ABCC5|SLC25A15|SLC38A3|PLA2G3|SLC38A4|SLC47A1|SLC25A32|MFSD2A|SFXN1|SLC22A9|SLC26A8|SLC36A4	-0.84
GO Biological Processes	GO:0072330	monocarboxylic acid biosynthetic process	-2.8	CBR1|CD74|CYP1A1|CYP1A2|GAMT|GPX4|GSTM1|LIPC|SCP2|XBP1|KMO|FADS2|QKI|ACSM5|HSD3B7|OSBPL1A|OSBPL9	-0.83
GO Biological Processes	GO:0060759	regulation of response to cytokine stimulus	-2.8	TLE5|APOA1|ARG1|CD74|DHX9|HPX|IRAK2|ADAM17|TAF9|TNFAIP3|AGPAT2|LSM14A|RABGEF1|RBM47|TRIM44|MAVS|SHARPIN	-0.83
GO Biological Processes	GO:0019359	nicotinamide nucleotide biosynthetic process	-2.8	KMO|KYNU|HAAO|NMRK1|NAXD|AFMID	-0.83
GO Biological Processes	GO:0019363	pyridine nucleotide biosynthetic process	-2.8	KMO|KYNU|HAAO|NMRK1|NAXD|AFMID	-0.83
GO Biological Processes	GO:0030212	hyaluronan metabolic process	-2.8	HYAL1|ITIH2|ITIH3|ITIH4|ABCC5|STAB2	-0.83
GO Biological Processes	GO:0008202	steroid metabolic process	-2.8	APOA1|APOE|SERPINA6|CBR1|SCARB1|CYP1A1|CYP1A2|CLN8|FDPS|GC|NR3C1|HSD17B4|LIPA|LIPC|NFE2L1|SCP2|SULT1A1|ANGPTL3|HSD3B7|OSBPL1A|OSBPL5|OSBPL9	-0.82
GO Biological Processes	GO:0010675	regulation of cellular carbohydrate metabolic process	-2.8	CLK2|GCGR|GPLD1|GPT|NR3C1|KHK|PDK2|PFKFB1|PHKG2|PPARA|STK11|USP7|KAT2B|ZMPSTE24|GNMT|DGAT2|SLC45A3	-0.81
GO Biological Processes	GO:0055086	nucleobase-containing small molecule metabolic process	-2.8	ADK|CACNB4|CPS1|DPAGT1|DPYD|ACSL1|ACSL4|GCDH|HSD17B4|MGAT1|NDUFB6|NDUFS8|PNP|NT5E|PFKFB1|PRPSAP2|SDHC|SULT1A1|TDO2|TK2|UGDH|KMO|SUCLG2|SUCLG1|KYNU|ENTPD4|GNE|AASS|NME6|ALDH1L1|CLPX|HAAO|NNT|GNMT|PIPOX|RAB23|PANK1|NMRK1|ACSM5|NAXD|OGDHL|UGGT1|ADPGK|DGAT2|AFMID|UPP2|ENTPD8	-0.8
GO Biological Processes	GO:1903312	negative regulation of mRNA metabolic process	-2.8	MAPK14|DHX9|FMR1|HNRNPC|PTBP1|SFSWAP|THRAP3|RNPS1|A1CF|RBM47|PCBP4|TENT4B	-0.8
GO Biological Processes	GO:0120009	intermembrane lipid transfer	-2.7	APOA1|APOE|MTTP|C2CD2L|PRELID3A|PRELID3B|PITPNM2|ABCG8|OSBPL5	-0.79
GO Biological Processes	GO:0030162	regulation of proteolysis	-2.7	A2M|AHSG|AMBP|BIN1|APOE|ARRB2|SERPINA6|CTSC|CLU|CTSH|CLN8|F2|FMR1|GPLD1|HPN|HRG|ITIH2|ITIH3|ITIH4|KLKB1|KNG1|LGALS9|SERPINA5|SERPINA1|PLAUR|PSMC3|PTPN3|RAD23A|SUMO2|TAF9|UBB|VTN|USP7|USP5|PICALM|ADAM9|PSMF1|DELE1|USP19|TLK2|GRAMD4|FBXW8|FETUB|USP25|PACSIN3|UCHL5|NUB1|PIH1D1|COP1|MARCHF7|ZFAND2A|SPOPL	-0.78
GO Biological Processes	GO:0045722	positive regulation of gluconeogenesis	-2.7	GPT|PPARA|STK11|KAT2B|DGAT2	-0.78
GO Biological Processes	GO:0042759	long-chain fatty acid biosynthetic process	-2.7	CYP1A1|CYP1A2|GPX4|GSTM1|QKI	-0.78
GO Biological Processes	GO:0031365	N-terminal protein amino acid modification	-2.7	PPM1B|KAT2B|NMT2|NAA20|NAA35|NAA60	-0.78
GO Biological Processes	GO:0042537	benzene-containing compound metabolic process	-2.7	GSTM1|TDO2|KMO|KYNU|HAAO|AFMID	-0.78
GO Biological Processes	GO:0065005	protein-lipid complex assembly	-2.7	BIN1|APOA1|APOC3|APOE|MTTP|MFSD2A	-0.78
GO Biological Processes	GO:0019441	tryptophan catabolic process to kynurenine	-2.7	TDO2|KYNU|AFMID	-0.78
GO Biological Processes	GO:0006524	alanine catabolic process	-2.7	AGXT|GPT|AGXT2	-0.78
GO Biological Processes	GO:0006522	alanine metabolic process	-2.7	AGXT|GPT|AGXT2	-0.78
GO Biological Processes	GO:0098838	folate transmembrane transport	-2.7	SLC19A1|ABCC5|SLC25A32	-0.78
GO Biological Processes	GO:0009080	pyruvate family amino acid catabolic process	-2.7	AGXT|GPT|AGXT2	-0.78
GO Biological Processes	GO:0009078	pyruvate family amino acid metabolic process	-2.7	AGXT|GPT|AGXT2	-0.78
GO Biological Processes	GO:0006572	tyrosine catabolic process	-2.7	GSTZ1|HPD|TAT	-0.78
GO Biological Processes	GO:0034384	high-density lipoprotein particle clearance	-2.7	APOA1|APOE|SCARB1	-0.78
GO Biological Processes	GO:0072329	monocarboxylic acid catabolic process	-2.7	ACADVL|ACOX1|AGXT|GCDH|HSD17B4|SCP2|SORD|ACOX2|ECI2|CRYL1|ECHDC2|AGXT2|ACAD11|LDHD	-0.78
GO Biological Processes	GO:0019835	cytolysis	-2.7	C5|C6|C8B|C9	-0.78
GO Biological Processes	GO:0075294	positive regulation by symbiont of entry into host	-2.7	CD74|LGALS1|LGALS9|P4HB	-0.78
GO Biological Processes	GO:0046598	positive regulation of viral entry into host cell	-2.7	CD74|LGALS1|LGALS9|P4HB	-0.78
GO Biological Processes	GO:0008211	glucocorticoid metabolic process	-2.7	APOA1|SERPINA6|CBR1|NR3C1	-0.78
GO Biological Processes	GO:0050665	hydrogen peroxide biosynthetic process	-2.7	ACOX1|CYP1A1|CYP1A2|MAOB	-0.78
GO Biological Processes	GO:0034454	microtubule anchoring at centrosome	-2.7	DCTN1|PCM1|NINL|HOOK3	-0.78
GO Biological Processes	GO:0015808	L-alanine transport	-2.7	SLC38A3|SLC38A4|SFXN1|SLC36A4	-0.78
GO Biological Processes	GO:0006109	regulation of carbohydrate metabolic process	-2.7	ARNT|CLK2|GCGR|GPLD1|GPT|NR3C1|KHK|PDK2|PFKFB1|PHKG2|PPARA|STK11|USP7|KAT2B|ZMPSTE24|GNMT|DGAT2|SLC45A3|PRXL2C	-0.78
GO Biological Processes	GO:0000245	spliceosomal complex assembly	-2.7	SRSF5|SFSWAP|DDX46|CELF1|TXNL4A|SF3B1|LUC7L2|LUC7L3|PRPF39|LUC7L|PTBP2	-0.77
GO Biological Processes	GO:0046942	carboxylic acid transport	-2.7	AGXT|CACNB4|CD36|SLC26A2|CLN8|SLC1A2|SLC7A2|SLC19A1|SLCO2A1|SLCO1A2|SLC5A6|SLC22A6|ABCC5|SLC25A15|SLC38A3|PLA2G3|SLC38A4|SLC47A1|SLC25A32|SFXN1|SLC22A9|SLC26A8|SLC36A4	-0.77
GO Biological Processes	GO:0042060	wound healing	-2.6	CD36|SCARB1|MAPK14|F2|F5|F13B|FGA|FGB|FGFR2|FGG|GNAS|HGFAC|HNF4A|HRG|KLKB1|KNG1|SMAD2|SERPINA1|PLAUR|PLG|PPARA|PROC|PROS1|ADAM17|TPM1|PROZ|YAP1|ADAMTS13|MRTFA|MIA3	-0.73
GO Biological Processes	GO:0000377	RNA splicing, via transesterification reactions with bulged adenosine as nucleophile	-2.6	DDX5|DHX9|FRG1|HNRNPC|HNRNPH3|HNRNPM|SRSF5|SFSWAP|DHX38|DDX46|ALYREF|CELF1|TXNL4A|RNPS1|RALY|SF3B1|LUC7L2|LUC7L3|PRPF39|SMU1|PRPF40A|LUC7L|PTBP2	-0.72
GO Biological Processes	GO:0000398	mRNA splicing, via spliceosome	-2.6	DDX5|DHX9|FRG1|HNRNPC|HNRNPH3|HNRNPM|SRSF5|SFSWAP|DHX38|DDX46|ALYREF|CELF1|TXNL4A|RNPS1|RALY|SF3B1|LUC7L2|LUC7L3|PRPF39|SMU1|PRPF40A|LUC7L|PTBP2	-0.72
GO Biological Processes	GO:0089718	amino acid import across plasma membrane	-2.6	CLN8|SLC1A2|SLC7A2|SLC38A3|SLC38A4|SLC47A1|SLC36A4	-0.7
GO Biological Processes	GO:0050688	regulation of defense response to virus	-2.6	DHX9|PCBP2|PPM1B|STAT1|TNFAIP3|ZMPSTE24|GRAMD4|TRIM44|RNF125|MAVS	-0.69
GO Biological Processes	GO:0016064	immunoglobulin mediated immune response	-2.6	C3|C4BPA|C5|C6|C8B|C9|CD74|CLU|HLA-DRA|CFI|MASP2|C1RL	-0.68
GO Biological Processes	GO:0009611	response to wounding	-2.5	ARG1|BNIP3|CD36|SCARB1|MAPK14|CYP1A1|F2|F5|F13B|FGA|FGB|FGFR2|FGG|FN1|GNAS|HGFAC|HNF4A|HRG|KLKB1|KNG1|SMAD2|SERPINA1|PLAUR|PLG|PPARA|MAP2K7|PROC|PROS1|SLC1A2|ADAM17|TPM1|PROZ|YAP1|ADAMTS13|MRTFA|RIPOR1|MIA3	-0.65
GO Biological Processes	GO:0002237	response to molecule of bacterial origin	-2.5	ARG1|ASS1|CD36|SCARB1|CPS1|MAPK14|CYP1A1|FGFR2|GCH1|HPGD|IRAK2|LBP|LGALS9|MAOB|MAPK3|MAP2K7|REN|ADAM17|TNFAIP3|XBP1|KMO|ADAM9|ADAMTS13|CDK19|CYRIB|MTDH	-0.64
GO Biological Processes	GO:0006690	icosanoid metabolic process	-2.5	ACOX1|CBR1|CD74|CYP1A1|CYP1A2|CYP2C18|GPX4|GSTM1|HPGD|CYP4F3|PLA2G3	-0.64
GO Biological Processes	GO:0032496	response to lipopolysaccharide	-2.5	ARG1|ASS1|CD36|SCARB1|CPS1|MAPK14|CYP1A1|FGFR2|GCH1|HPGD|IRAK2|LBP|LGALS9|MAOB|MAPK3|MAP2K7|REN|ADAM17|TNFAIP3|XBP1|KMO|ADAM9|ADAMTS13|CDK19|MTDH	-0.64
GO Biological Processes	GO:0043252	sodium-independent organic anion transport	-2.5	SLCO2A1|SLCO1A2|SLC22A6|SLC22A9	-0.64
GO Biological Processes	GO:0071493	cellular response to UV-B	-2.5	MAPK14|HYAL1|MME|STK11	-0.64
GO Biological Processes	GO:0070189	kynurenine metabolic process	-2.5	TDO2|KMO|KYNU|AFMID	-0.64
GO Biological Processes	GO:0009163	nucleoside biosynthetic process	-2.5	ADK|PNP|NT5E|TK2	-0.64
GO Biological Processes	GO:0034975	protein folding in endoplasmic reticulum	-2.5	P4HB|DNAJC3|HSP90B1|ERO1B	-0.64
GO Biological Processes	GO:0072378	blood coagulation, fibrin clot formation	-2.5	F13B|FGA|FGB|FGG	-0.64
GO Biological Processes	GO:0034404	nucleobase-containing small molecule biosynthetic process	-2.5	ADK|PNP|NT5E|TK2	-0.64
GO Biological Processes	GO:0000375	RNA splicing, via transesterification reactions	-2.5	DDX5|DHX9|FRG1|HNRNPC|HNRNPH3|HNRNPM|SRSF5|SFSWAP|DHX38|DDX46|ALYREF|CELF1|TXNL4A|RNPS1|RALY|SF3B1|LUC7L2|LUC7L3|PRPF39|SMU1|PRPF40A|LUC7L|PTBP2	-0.64
GO Biological Processes	GO:0072525	pyridine-containing compound biosynthetic process	-2.5	KMO|KYNU|HAAO|NMRK1|NAXD|AFMID	-0.64
GO Biological Processes	GO:0006760	folic acid-containing compound metabolic process	-2.5	GCH1|MTRR|SLC19A1|MTHFS|ALDH1L1|SLC25A32	-0.64
GO Biological Processes	GO:0071219	cellular response to molecule of bacterial origin	-2.5	ARG1|ASS1|CD36|SCARB1|MAPK14|IRAK2|LBP|MAPK3|MAP2K7|TNFAIP3|XBP1|KMO|ADAM9|ADAMTS13|CDK19|CYRIB|MTDH	-0.64
GO Biological Processes	GO:0019724	B cell mediated immunity	-2.5	C3|C4BPA|C5|C6|C8B|C9|CD74|CLU|HLA-DRA|CFI|MASP2|C1RL	-0.62
GO Biological Processes	GO:0032102	negative regulation of response to external stimulus	-2.5	A2M|APOA1|APOE|ARG1|ARRB2|C5|CRK|MAPK14|F2|FGA|FGB|FGG|HRG|KLKB1|KNG1|LGALS9|NT5E|PCBP2|PLG|PPARA|PPM1B|PROC|PROS1|TNFAIP3|VTN|GRAMD4|RABGEF1|CERS2|RNF125|SEMA4G|SHARPIN|MACIR	-0.61
GO Biological Processes	GO:0002443	leukocyte mediated immunity	-2.5	C3|C4BPA|C5|C6|C8B|C9|CD74|CTSC|CLU|CTSH|F2|HLA-DRA|CFI|VAMP7|ADAM17|MASP2|RABGEF1|PLA2G3|C1RL	-0.61
GO Biological Processes	GO:1903902	positive regulation of viral life cycle	-2.4	CD74|FMR1|LGALS1|LGALS9|P4HB	-0.61
GO Biological Processes	GO:0034656	nucleobase-containing small molecule catabolic process	-2.4	DPYD|MGAT1|PNP|ENTPD4|UPP2	-0.61
GO Biological Processes	GO:0010866	regulation of triglyceride biosynthetic process	-2.4	C3|SCARB1|GPLD1|DGAT2|MFSD2A	-0.61
GO Biological Processes	GO:0090208	positive regulation of triglyceride metabolic process	-2.4	SCARB1|GPLD1|ABHD5|DGAT2|MFSD2A	-0.61
GO Biological Processes	GO:0000041	transition metal ion transport	-2.4	SLC31A1|CP|FTH1|HPX|HRG|TCN2|TF|SLC30A2|ABCC5|STEAP3|SLC30A10|SFXN1	-0.6
GO Biological Processes	GO:0042445	hormone metabolic process	-2.4	ADH4|ADH6|ALDH1A1|CYP1A1|CYP1A2|CYP2C18|GHR|HSD17B4|MME|P4HB|RBP4|REN|SULT1A1|DHRS3|RDH11|DHRS7|DGAT2	-0.6
GO Biological Processes	GO:0061136	regulation of proteasomal protein catabolic process	-2.4	APOE|CLU|FMR1|PSMC3|RAD23A|SUMO2|TAF9|UBB|USP7|USP5|PSMF1|USP19|TLK2|FBXW8|USP25|UCHL5|NUB1|COP1|MARCHF7|ZFAND2A	-0.6
GO Biological Processes	GO:0010676	positive regulation of cellular carbohydrate metabolic process	-2.4	GPLD1|GPT|PHKG2|PPARA|STK11|KAT2B|DGAT2|SLC45A3	-0.6
GO Biological Processes	GO:0031638	zymogen activation	-2.4	CTSH|FGA|FGB|FGG|HGFAC|KLKB1|MASP1|C1RL	-0.6
GO Biological Processes	GO:0045913	positive regulation of carbohydrate metabolic process	-2.4	ARNT|GPLD1|GPT|PHKG2|PPARA|STK11|KAT2B|DGAT2|SLC45A3|PRXL2C	-0.6
GO Biological Processes	GO:0015942	formate metabolic process	-2.4	HAL|MTHFS|AMDHD1	-0.6
GO Biological Processes	GO:2000618	regulation of histone H4-K16 acetylation	-2.4	ZMPSTE24|AUTS2|PIH1D1	-0.6
GO Biological Processes	GO:0001867	complement activation, lectin pathway	-2.4	MASP1|MASP2|COLEC11	-0.6
GO Biological Processes	GO:0070508	cholesterol import	-2.4	APOA1|CD36|SCARB1	-0.6
GO Biological Processes	GO:0035694	mitochondrial protein catabolic process	-2.4	BNIP3|YME1L1|PISD	-0.6
GO Biological Processes	GO:1900048	positive regulation of hemostasis	-2.4	CD36|F2|HRG|PLG|ST3GAL4|VTN	-0.59
GO Biological Processes	GO:0030194	positive regulation of blood coagulation	-2.4	CD36|F2|HRG|PLG|ST3GAL4|VTN	-0.59
GO Biological Processes	GO:0071216	cellular response to biotic stimulus	-2.4	ARG1|ASS1|CD36|SCARB1|MAPK14|IRAK2|LBP|MAPK3|MAP2K7|TNFAIP3|XBP1|KMO|ADAM9|ZMPSTE24|ADAMTS13|CDK19|CYRIB|FBH1|MTDH	-0.58
GO Biological Processes	GO:0016485	protein processing	-2.4	CTSH|FGA|FGB|FGG|HGFAC|KLKB1|MME|P4HB|MASP1|REN|ADAM17|RCE1|ZMPSTE24|YME1L1|ADAMTS13|SEC11A|PISD|SPCS1|C1RL|SEC11C	-0.58
GO Biological Processes	GO:0051918	negative regulation of fibrinolysis	-2.3	F2|HRG|PLG|VTN	-0.55
GO Biological Processes	GO:0010867	positive regulation of triglyceride biosynthetic process	-2.3	SCARB1|GPLD1|DGAT2|MFSD2A	-0.55
GO Biological Processes	GO:0006474	N-terminal protein amino acid acetylation	-2.3	KAT2B|NAA20|NAA35|NAA60	-0.55
GO Biological Processes	GO:0051044	positive regulation of membrane protein ectodomain proteolysis	-2.3	APOE|GPLD1|ADAM9|PACSIN3	-0.55
GO Biological Processes	GO:0034383	low-density lipoprotein particle clearance	-2.3	CD36|SCARB1|LIPA|DGAT2	-0.55
GO Biological Processes	GO:0055091	phospholipid homeostasis	-2.3	APOA1|HNF4A|ANGPTL3|TLCD2	-0.55
GO Biological Processes	GO:0072393	microtubule anchoring at microtubule organizing center	-2.3	DCTN1|PCM1|NINL|HOOK3	-0.55
GO Biological Processes	GO:0034374	low-density lipoprotein particle remodeling	-2.3	APOE|LIPC|MTTP|PLA2G3	-0.55
GO Biological Processes	GO:0072521	purine-containing compound metabolic process	-2.3	ADK|CACNB4|DPYD|ACSL1|ACSL4|GCDH|HSD17B4|NDUFB6|NDUFS8|PNP|NT5E|PFKFB1|PRPSAP2|SDHC|SULT1A1|TDO2|KMO|SUCLG2|SUCLG1|KYNU|ENTPD4|AASS|NME6|ALDH1L1|CLPX|HAAO|NNT|GNMT|PIPOX|RAB23|PANK1|NMRK1|ACSM5|NAXD|OGDHL|SLC2A9|ADPGK|DGAT2|AFMID	-0.55
GO Biological Processes	GO:0019395	fatty acid oxidation	-2.3	ACADVL|ACOX1|ADH4|MAPK14|GCDH|HSD17B4|SCP2|ACOX2|ECI2|ECHDC2|ACAD11	-0.53
GO Biological Processes	GO:0009991	response to extracellular stimulus	-2.3	A2M|TLE5|ALB|APOE|ARG1|ASGR1|ASL|ASS1|BNIP3|CPS1|MAPK14|CYP1A1|EIF4G1|F5|ACSL1|GCGR|GHR|GPT|OTC|PDK2|PFKFB1|PPARA|MAPK3|SLC1A2|SORD|STAT1|XBP1|STK24|KYNU|ULK2|GAS2L1|SLC38A3|WIPI2|DNAJC15|ABCG8|TMEM135|MAPKAP1|RIPOR1|MFSD2A	-0.53
GO Biological Processes	GO:0043094	cellular metabolic compound salvage	-2.3	ADK|BHMT|PNP|TK2|BHMT2|UPP2	-0.53
GO Biological Processes	GO:0042176	regulation of protein catabolic process	-2.3	APOE|C4BPA|CLU|FMR1|GPLD1|OAZ1|PSMC3|PSMD1|PTPN3|RAD23A|SUMO2|TAF9|TNFAIP3|UBB|USP7|USP5|ADAM9|PSMF1|USP19|TLK2|FBXW8|USP25|PACSIN3|ATRAID|UCHL5|NUB1|LAPTM4B|COP1|MARCHF7|RNF128|RILP|ZFAND2A	-0.53
GO Biological Processes	GO:0010466	negative regulation of peptidase activity	-2.3	A2M|AHSG|AMBP|BIN1|ARRB2|SERPINA6|HRG|ITIH2|ITIH3|ITIH4|KNG1|SERPINA5|SERPINA1|PLAUR|VTN|PICALM|FETUB|PIH1D1	-0.53
GO Biological Processes	GO:0001961	positive regulation of cytokine-mediated signaling pathway	-2.3	CD74|HPX|ADAM17|AGPAT2|LSM14A|RBM47|TRIM44|MAVS	-0.51
GO Biological Processes	GO:0071222	cellular response to lipopolysaccharide	-2.3	ARG1|ASS1|CD36|SCARB1|MAPK14|IRAK2|LBP|MAPK3|MAP2K7|TNFAIP3|XBP1|KMO|ADAM9|ADAMTS13|CDK19|MTDH	-0.5
GO Biological Processes	GO:0006635	fatty acid beta-oxidation	-2.3	ACADVL|ACOX1|GCDH|HSD17B4|SCP2|ACOX2|ECI2|ECHDC2|ACAD11	-0.49
GO Biological Processes	GO:0046486	glycerolipid metabolic process	-2.2	APOA1|APOC3|APOE|CHKA|CPS1|ACSL1|GK|GPLD1|LIPC|MTTP|GAL3ST1|AGPAT2|PIP5K1C|PISD|PLA2G3|ABHD5|IP6K2|GDE1|PIGX|SMPD4|GPCPD1|CHPT1|PITPNM2|ABHD4|MTMR14|DGAT2|MFSD2A|OSBPL5|OSBPL10	-0.47
GO Biological Processes	GO:0050820	positive regulation of coagulation	-2.2	CD36|F2|HRG|PLG|ST3GAL4|VTN	-0.47
GO Biological Processes	GO:0015802	basic amino acid transport	-2.2	SLC7A2|SLC25A15|SLC38A3|SLC38A4|SLC47A1	-0.47
GO Biological Processes	GO:0051043	regulation of membrane protein ectodomain proteolysis	-2.2	APOE|GPLD1|PTPN3|ADAM9|PACSIN3	-0.47
GO Biological Processes	GO:1902992	negative regulation of amyloid precursor protein catabolic process	-2.2	BIN1|APOE|CLU|PICALM|RTN4	-0.47
GO Biological Processes	GO:0006826	iron ion transport	-2.2	CP|FTH1|HPX|HRG|TF|ABCC5|STEAP3|SFXN1	-0.46
GO Biological Processes	GO:1901264	carbohydrate derivative transport	-2.2	SCARB1|CD47|SLC29A1|SLC37A4|LBP|SLC19A1|ABCC5|SLC35A1|SLC35C2|MFSD2A	-0.46
GO Biological Processes	GO:0019915	lipid storage	-2.2	APOA1|APOE|AUP1|CD36|PISD|ANGPTL3|DGAT2	-0.46
GO Biological Processes	GO:0033865	nucleoside bisphosphate metabolic process	-2.2	ACSL1|ACSL4|GCDH|HSD17B4|SULT1A1|TDO2|SUCLG2|SUCLG1|AASS|PIPOX|PANK1|ACSM5|DGAT2	-0.46
GO Biological Processes	GO:0033875	ribonucleoside bisphosphate metabolic process	-2.2	ACSL1|ACSL4|GCDH|HSD17B4|SULT1A1|TDO2|SUCLG2|SUCLG1|AASS|PIPOX|PANK1|ACSM5|DGAT2	-0.46
GO Biological Processes	GO:0034032	purine nucleoside bisphosphate metabolic process	-2.2	ACSL1|ACSL4|GCDH|HSD17B4|SULT1A1|TDO2|SUCLG2|SUCLG1|AASS|PIPOX|PANK1|ACSM5|DGAT2	-0.46
GO Biological Processes	GO:0030301	cholesterol transport	-2.2	APOA1|APOC3|APOE|CD36|SCARB1|CLU|LIPC|ABCG8|OSBPL5	-0.46
GO Biological Processes	GO:0006855	xenobiotic transmembrane transport	-2.2	SLC29A1|SLC19A1|ABCC5|SLC47A1	-0.46
GO Biological Processes	GO:0046655	folic acid metabolic process	-2.2	MTRR|SLC19A1|MTHFS|SLC25A32	-0.46
GO Biological Processes	GO:0006544	glycine metabolic process	-2.2	AGXT|GCSH|RIDA|AGXT2	-0.46
GO Biological Processes	GO:0002449	lymphocyte mediated immunity	-2.2	C3|C4BPA|C5|C6|C8B|C9|CD74|CTSC|CLU|CTSH|HLA-DRA|CFI|VAMP7|MASP2|C1RL	-0.45
GO Biological Processes	GO:0006637	acyl-CoA metabolic process	-2.2	ACSL1|ACSL4|GCDH|HSD17B4|TDO2|SUCLG2|SUCLG1|AASS|PIPOX|ACSM5|DGAT2	-0.45
GO Biological Processes	GO:0035383	thioester metabolic process	-2.2	ACSL1|ACSL4|GCDH|HSD17B4|TDO2|SUCLG2|SUCLG1|AASS|PIPOX|ACSM5|DGAT2	-0.45
GO Biological Processes	GO:0043174	nucleoside salvage	-2.2	ADK|PNP|TK2	-0.45
GO Biological Processes	GO:0019532	oxalate transport	-2.2	AGXT|SLC26A2|SLC26A8	-0.45
GO Biological Processes	GO:0000052	citrulline metabolic process	-2.2	ASS1|CPS1|OTC	-0.45
GO Biological Processes	GO:0010815	bradykinin catabolic process	-2.2	CTSH|MME|XPNPEP1	-0.45
GO Biological Processes	GO:0019080	viral gene expression	-2.2	DHX9|MGAT1|PCBP2|PTBP1|ST3GAL4|ST6GALNAC2|SPCS1|SHFL	-0.43
GO Biological Processes	GO:0002697	regulation of immune effector process	-2.2	A2M|APOA1|ARG1|ARRB2|C3|C4BPA|CD1D|CD36|CD47|CD74|CRK|CFH|HLA-DRA|HPX|LBP|LGALS9|PKN1|RBP4|VAMP7|XBP1|PARP3|CADM1|RABGEF1|PLA2G3|CYRIB|MAVS|COLEC11	-0.43
GO Biological Processes	GO:0002831	regulation of response to biotic stimulus	-2.2	A2M|APOE|ARG1|ARRB2|CD1D|CD36|CRK|DHX9|CFH|HPX|HRG|IRAK2|LBP|LGALS9|NONO|PCBP2|PPM1B|MAPK3|STAT1|TNFAIP3|ZMPSTE24|GRAMD4|CADM1|LSM14A|RBM47|TRIM44|RNF125|LGR4|RTN4|MAVS|COLEC11|PIK3AP1	-0.43
GO Biological Processes	GO:0010951	negative regulation of endopeptidase activity	-2.1	A2M|AHSG|BIN1|ARRB2|SERPINA6|HRG|KNG1|SERPINA5|SERPINA1|PLAUR|VTN|PICALM|FETUB|PIH1D1	-0.41
GO Biological Processes	GO:0034341	response to type II interferon	-2.1	ASS1|CD47|CD74|GCH1|HPX|LGALS9|CIITA|STAT1|KYNU|ADAMTS13|NUB1|SHFL	-0.41
GO Biological Processes	GO:0034377	plasma lipoprotein particle assembly	-2.1	APOA1|APOC3|APOE|MTTP|MFSD2A	-0.41
GO Biological Processes	GO:0034250	positive regulation of amide metabolic process	-2.1	CLU|DHX9|EIF4G1|FMR1|EIF3E|DNAJC3|SH3BGRL|FXR1|PICALM|CDC123|CPEB3|SIRT3|TRUB2|NSUN5|TENT4B|JMJD4	-0.39
GO Biological Processes	GO:0006163	purine nucleotide metabolic process	-2.1	ADK|CACNB4|ACSL1|ACSL4|GCDH|HSD17B4|NDUFB6|NDUFS8|PNP|NT5E|PFKFB1|PRPSAP2|SDHC|SULT1A1|TDO2|KMO|SUCLG2|SUCLG1|KYNU|ENTPD4|AASS|NME6|ALDH1L1|CLPX|HAAO|NNT|PIPOX|RAB23|PANK1|NMRK1|ACSM5|NAXD|OGDHL|ADPGK|DGAT2|AFMID	-0.39
GO Biological Processes	GO:0031341	regulation of cell killing	-2.1	ARG1|ARRB2|CD1D|CRK|CFH|HLA-DRA|LGALS9|CADM1|CYRIB	-0.39
GO Biological Processes	GO:1901616	organic hydroxy compound catabolic process	-2.1	ADH4|APOE|SCARB1|GK|MAOA|MAOB|SORD|SULT1A1|LDHD	-0.39
GO Biological Processes	GO:0034440	lipid oxidation	-2.1	ACADVL|ACOX1|ADH4|MAPK14|GCDH|HSD17B4|SCP2|ACOX2|ECI2|ECHDC2|ACAD11	-0.38
GO Biological Processes	GO:0031667	response to nutrient levels	-2.1	A2M|ALB|APOE|ARG1|ASL|ASS1|BNIP3|CPS1|MAPK14|CYP1A1|EIF4G1|F5|ACSL1|GCGR|GHR|GPT|OTC|PDK2|PFKFB1|PPARA|MAPK3|SORD|STAT1|XBP1|STK24|KYNU|ULK2|GAS2L1|SLC38A3|WIPI2|DNAJC15|ABCG8|TMEM135|MAPKAP1|RIPOR1|MFSD2A	-0.38
GO Biological Processes	GO:0009116	nucleoside metabolic process	-2.1	ADK|DPYD|PNP|NT5E|TK2|GNMT|UPP2	-0.38
GO Biological Processes	GO:0046185	aldehyde catabolic process	-2.1	ADH4|AGXT|HAGH|AGXT2	-0.38
GO Biological Processes	GO:0018206	peptidyl-methionine modification	-2.1	APOA1|NAA20|NAA35|NAA60	-0.38
GO Biological Processes	GO:1903826	L-arginine transmembrane transport	-2.1	SLC7A2|SLC25A15|SLC38A4|SLC47A1	-0.38
GO Biological Processes	GO:0006570	tyrosine metabolic process	-2.1	GSTZ1|HPD|PAH|TAT	-0.38
GO Biological Processes	GO:0051645	Golgi localization	-2.1	STK11|STK25|RIPOR1|HOOK3	-0.38
GO Biological Processes	GO:0000302	response to reactive oxygen species	-2.1	APOE|ARG1|BNIP3|CRK|HYAL1|PDK2|MAPK3|STAT1|TNFAIP3|TPM1|STK24|ADAM9|NET1|STK25|OSER1|ADPRS|AGAP3	-0.38
GO Biological Processes	GO:0006099	tricarboxylic acid cycle	-2.1	IDH3G|SDHC|SUCLG2|SUCLG1|NNT|OGDHL	-0.38
GO Biological Processes	GO:1905039	carboxylic acid transmembrane transport	-2.1	CD36|CLN8|SLC1A2|SLC7A2|SLC19A1|SLC5A6|ABCC5|SLC25A15|SLC38A3|SLC38A4|SLC47A1|SLC25A32|SFXN1|SLC36A4	-0.38
GO Biological Processes	GO:0050714	positive regulation of protein secretion	-2.1	F2|ACSL4|FGA|FGB|FGG|GLUD1|GPLD1|PSMD9|RBP4|ADAM9|C2CD2L|FRMD4A|EXOC1|GOLPH3	-0.38
GO Biological Processes	GO:0098754	detoxification	-2.1	ADH4|ALB|ALDH1A1|APOE|GPX4|GSTM1|GSTZ1|SLC22A18|RDH11|SLC47A1|SLC30A10|PRXL2C	-0.36
GO Biological Processes	GO:0015807	L-amino acid transport	-2.1	CLN8|SLC1A2|SLC7A2|SLC25A15|SLC38A3|SLC38A4|SLC47A1|SFXN1|SLC36A4	-0.36
GO Biological Processes	GO:1903825	organic acid transmembrane transport	-2	CD36|CLN8|SLC1A2|SLC7A2|SLC19A1|SLC5A6|ABCC5|SLC25A15|SLC38A3|SLC38A4|SLC47A1|SLC25A32|SFXN1|SLC36A4	-0.35
GO Biological Processes	GO:0071108	protein K48-linked deubiquitination	-2	TNFAIP3|USP5|USP34|USP25|MINDY1	-0.35
GO Biological Processes	GO:0009119	ribonucleoside metabolic process	-2	ADK|PNP|NT5E|GNMT|UPP2	-0.35
GO Biological Processes	GO:0009162	deoxyribonucleoside monophosphate metabolic process	-2	ADK|DPYD|PNP|TK2|UPP2	-0.35
GO Biological Processes	GO:0050878	regulation of body fluid levels	-2	APOE|CD36|CDO1|MAPK14|SLC29A1|F2|F5|F13B|FGA|FGB|FGG|GNAS|HGFAC|HNF4A|HRG|KLKB1|KNG1|PAM|SERPINA1|PLAUR|PLG|PROC|PROS1|ST3GAL4|VTN|XBP1|PROZ|ADAMTS13	-0.35
GO Biological Processes	GO:0046889	positive regulation of lipid biosynthetic process	-2	APOE|SCARB1|CD74|GPLD1|PPARA|SIRT3|PLA2G3|DGAT2|MFSD2A|SLC45A3	-0.34
GO Biological Processes	GO:0009636	response to toxic substance	-2	ADH4|ALB|ALDH1A1|APOE|ARG1|ASS1|CPS1|CYP1A1|GPX4|GSTM1|GSTZ1|MAOB|SLC22A18|PON2|ADAMTS13|RDH11|SLC47A1|SLC30A10|PRXL2C	-0.33
GO Biological Processes	GO:0001910	regulation of leukocyte mediated cytotoxicity	-2	ARG1|ARRB2|CD1D|CRK|HLA-DRA|LGALS9|CADM1|CYRIB	-0.33
GO Biological Processes	GO:0006641	triglyceride metabolic process	-2	APOC3|APOE|CPS1|ACSL1|GK|LIPC|MTTP|DGAT2	-0.33
GO Biological Processes	GO:0017196	N-terminal peptidyl-methionine acetylation	-2	NAA20|NAA35|NAA60	-0.33
GO Biological Processes	GO:0046487	glyoxylate metabolic process	-2	AGXT|AGXT2|HYI	-0.33
GO Biological Processes	GO:1902416	positive regulation of mRNA binding	-2	EIF4G1|FMR1|EIF3E	-0.33
GO Biological Processes	GO:0070391	response to lipoteichoic acid	-2	CD36|MAPK14|LBP	-0.33
GO Biological Processes	GO:0000098	sulfur amino acid catabolic process	-2	AGXT|CDO1|MTRR	-0.33
GO Biological Processes	GO:0032489	regulation of Cdc42 protein signal transduction	-2	APOA1|APOC3|APOE	-0.33
GO Biological Processes	GO:0019372	lipoxygenase pathway	-2	GPX4|HPGD|PLA2G3	-0.33
GO Biological Processes	GO:0019373	epoxygenase P450 pathway	-2	CYP1A1|CYP1A2|CYP2C18	-0.33
GO Biological Processes	GO:0110095	cellular detoxification of aldehyde	-2	ADH4|ALDH1A1|RDH11	-0.33
GO Biological Processes	GO:0071223	cellular response to lipoteichoic acid	-2	CD36|MAPK14|LBP	-0.33
GO Biological Processes	GO:0015884	folic acid transport	-2	SLC19A1|ABCC5|SLC25A32	-0.33
KEGG Pathway	hsa04610	Complement and coagulation cascades	-16	A2M|CFB|C3|C4BPA|C5|C6|C8B|C9|CLU|F2|F5|F13B|FGA|FGB|FGG|CFH|CFI|KLKB1|KNG1|SERPINA5|SERPINA1|PLAUR|PLG|PROC|PROS1|MASP1|VTN|MASP2	-11
KEGG Pathway	hsa00250	Alanine, aspartate and glutamate metabolism	-5.7	AGXT|ASL|ASPA|ASS1|CPS1|GLUD1|GPT|ALDH4A1|GLS2|NIT2|AGXT2	-3
KEGG Pathway	hsa00220	Arginine biosynthesis	-5.1	ARG1|ASL|ASS1|CPS1|GLUD1|GPT|OTC|GLS2	-2.6
KEGG Pathway	hsa05150	Staphylococcus aureus infection	-4.5	CFB|C3|C5|FGG|CFH|HLA-DRA|CFI|ITGAL|PLG|MASP1|MASP2	-2.1
KEGG Pathway	hsa00830	Retinol metabolism	-4.5	ADH4|ADH6|ALDH1A1|CYP1A1|CYP1A2|CYP2C18|DHRS3|RDH11|UGT1A6	-2.1
KEGG Pathway	hsa00380	Tryptophan metabolism	-4.2	CYP1A1|CYP1A2|GCDH|MAOA|MAOB|TDO2|KMO|KYNU|HAAO|AFMID	-1.9
KEGG Pathway	hsa00260	Glycine, serine and threonine metabolism	-3.7	AGXT|BHMT|GAMT|GCSH|MAOA|MAOB|GNMT|PIPOX|AGXT2	-1.5
KEGG Pathway	hsa05204	Chemical carcinogenesis - DNA adducts	-3.7	CBR1|CYP1A1|CYP1A2|CYP2C18|GSTA2|GSTM1|SULT1A1|UGT1A6	-1.5
KEGG Pathway	hsa04975	Fat digestion and absorption	-3.7	APOA1|CD36|SCARB1|MTTP|AGPAT2|PLA2G3|ABCG8|DGAT2	-1.5
KEGG Pathway	hsa04979	Cholesterol metabolism	-3.7	APOA1|APOC3|APOE|CD36|SCARB1|LIPA|LIPC|ANGPTL3|ABCG8|OSBPL5	-1.5
KEGG Pathway	hsa00982	Drug metabolism - cytochrome P450	-3.4	ADH4|ADH6|CYP1A2|GSTA2|GSTM1|MAOA|MAOB|UGT1A6	-1.3
KEGG Pathway	hsa00360	Phenylalanine metabolism	-3.2	HPD|MAOA|MAOB|PAH|TAT	-1.1
KEGG Pathway	hsa00350	Tyrosine metabolism	-3.2	ADH4|ADH6|GSTZ1|HPD|MAOA|MAOB|TAT	-1.1
KEGG Pathway	hsa00980	Metabolism of xenobiotics by cytochrome P450	-3.1	ADH4|ADH6|CBR1|CYP1A1|CYP1A2|GSTA2|GSTM1|UGT1A6	-1.1
KEGG Pathway	hsa04216	Ferroptosis	-2.9	CP|ACSL1|ACSL4|FTH1|GPX4|PCBP2|TF|STEAP3	-0.86
KEGG Pathway	hsa03320	PPAR signaling pathway	-2.7	ACOX1|APOA1|APOC3|CD36|ACSL1|ACSL4|GK|PPARA|SCP2|ACOX2|FADS2	-0.78
KEGG Pathway	hsa00071	Fatty acid degradation	-2.7	ACADVL|ACOX1|ADH4|ADH6|ACSL1|ACSL4|GCDH|ECI2	-0.78
KEGG Pathway	hsa00040	Pentose and glucuronate interconversions	-2.6	SORD|UGDH|CRYL1|UGT1A6|FGGY	-0.68
KEGG Pathway	hsa00120	Primary bile acid biosynthesis	-2.3	HSD17B4|SCP2|ACOX2|HSD3B7	-0.55
KEGG Pathway	hsa04146	Peroxisome	-2.3	ACOX1|AGXT|ACSL1|ACSL4|HSD17B4|PEX19|PXMP2|SCP2|ACOX2|ECI2|PIPOX	-0.5
KEGG Pathway	hsa04977	Vitamin digestion and absorption	-2.2	APOA1|SCARB1|SLC19A1|TCN2|SLC5A6	-0.47
KEGG Pathway	hsa00900	Terpenoid backbone biosynthesis	-2.1	FDPS|GGPS1|RCE1|ZMPSTE24|PCYOX1	-0.41
KEGG Pathway	hsa01240	Biosynthesis of cofactors	-2.1	GCH1|HPD|MOCS2|PPOX|TDO2|UGDH|KMO|KYNU|DHRS3|NME6|HAAO|RDH11|PANK1|UGT1A6|AFMID	-0.38
KEGG Pathway	hsa00340	Histidine metabolism	-2	ASPA|HAL|MAOA|MAOB|AMDHD1	-0.35

## Sheet: Liver-overlapped DEGs and DSGs
Category	GO	Description	LogP	Hits	Log(q-value)
GO Biological Processes	GO:0006518	peptide metabolic process	-6.4	GGT1|GSTA4|RPL9|RPL10|RPL12|RPL22|RPL34|RPS16|RPS18|RPS24|RPS25|PARK7|ETHE1|MRPL13|AURKAIP1|BDH2|MRPS14|MRPL11|MTG1|MRPL52|RPL22L1	-2.6
GO Biological Processes	GO:0043043	peptide biosynthetic process	-6.3	GGT1|RPL9|RPL10|RPL12|RPL22|RPL34|RPS16|RPS18|RPS24|RPS25|MRPL13|AURKAIP1|BDH2|MRPS14|MRPL11|MTG1|MRPL52|RPL22L1	-2.6
GO Biological Processes	GO:0043484	regulation of RNA splicing	-5.9	HNRNPA1|HNRNPA2B1|ATXN7|SRSF6|SNRNP70|TAF10|ZPR1|PTBP3|RBM5|ENY2|CLK4|TADA2B	-2.3
GO Biological Processes	GO:0043604	amide biosynthetic process	-5.8	GGT1|RPL9|RPL10|RPL12|RPL22|RPL34|RPS16|RPS18|RPS24|RPS25|ST3GAL1|PEMT|MRPL13|AURKAIP1|BDH2|MRPS14|MRPL11|MTG1|MRPL52|RPL22L1	-2.3
GO Biological Processes	GO:0002181	cytoplasmic translation	-5.7	RPL9|RPL10|RPL12|RPL22|RPL34|RPS16|RPS18|RPS24|RPS25|RPL22L1	-2.3
GO Biological Processes	GO:0006412	translation	-5.4	RPL9|RPL10|RPL12|RPL22|RPL34|RPS16|RPS18|RPS24|RPS25|MRPL13|AURKAIP1|MRPS14|MRPL11|MTG1|MRPL52|RPL22L1	-2
GO Biological Processes	GO:0045725	positive regulation of glycogen biosynthetic process	-5.3	AKT2|IGF1|INSR|SORBS1	-2
GO Biological Processes	GO:0070875	positive regulation of glycogen metabolic process	-5.1	AKT2|IGF1|INSR|SORBS1	-1.9
GO Biological Processes	GO:0062012	regulation of small molecule metabolic process	-5	AKT2|APOC1|DAB2|FBP1|FMO4|IGF1|INSR|POR|NCOR2|NR1H4|NCOA2|SORBS1|PARK7|MLXIPL	-1.8
GO Biological Processes	GO:0062013	positive regulation of small molecule metabolic process	-4.7	AKT2|DAB2|IGF1|INSR|POR|NR1H4|SORBS1|PARK7|MLXIPL	-1.6
GO Biological Processes	GO:0098754	detoxification	-4.6	ESD|GPX3|SLC22A5|TXNRD1|PARK7|PRDX5|PRXL2A|TXNDC17	-1.6
GO Biological Processes	GO:0006368	transcription elongation by RNA polymerase II	-4.5	POLR2I|SUPT6H|ELL2|ENY2|ELOF1	-1.4
GO Biological Processes	GO:0034645	cellular macromolecule biosynthetic process	-4.4	AKT2|IGF1|RPL9|RPL10|RPL12|RPL22|RPL34|RPS16|RPS18|RPS24|RPS25|ST3GAL1|VEGFB|TMEM59|MRPL13|ZDHHC1|AURKAIP1|MRPS14|MRPL11|MTG1|MRPL52|RPL22L1	-1.4
GO Biological Processes	GO:1990748	cellular detoxification	-4.2	ESD|GPX3|TXNRD1|PARK7|PRDX5|PRXL2A|TXNDC17	-1.2
GO Biological Processes	GO:0006354	DNA-templated transcription elongation	-4.1	POLR2I|SUPT6H|ELL2|ENY2|ELOF1	-1.2
GO Biological Processes	GO:0010565	regulation of cellular ketone metabolic process	-4.1	AKT2|APOC1|DAB2|FMO4|NCOR2|NR1H4|PARK7|MLXIPL	-1.2
GO Biological Processes	GO:0097237	cellular response to toxic substance	-3.9	ESD|GPX3|TXNRD1|PARK7|PRDX5|PRXL2A|TXNDC17	-1
GO Biological Processes	GO:0010962	regulation of glucan biosynthetic process	-3.9	AKT2|IGF1|INSR|SORBS1	-1
GO Biological Processes	GO:0005979	regulation of glycogen biosynthetic process	-3.9	AKT2|IGF1|INSR|SORBS1	-1
GO Biological Processes	GO:0044282	small molecule catabolic process	-3.8	KYAT1|ESD|HNMT|PHYH|PON1|FTCD|PARK7|DECR2|DCXR|SCLY|BDH2|GK5|NUDT7	-0.96
GO Biological Processes	GO:0098869	cellular oxidant detoxification	-3.7	GPX3|TXNRD1|PARK7|PRDX5|PRXL2A|TXNDC17	-0.94
GO Biological Processes	GO:0016054	organic acid catabolic process	-3.5	KYAT1|HNMT|PHYH|PON1|FTCD|DECR2|DCXR|SCLY|BDH2|NUDT7	-0.74
GO Biological Processes	GO:0070873	regulation of glycogen metabolic process	-3.4	AKT2|IGF1|INSR|SORBS1	-0.69
GO Biological Processes	GO:0016071	mRNA metabolic process	-3.4	HNRNPA1|HNRNPA2B1|POLR2I|SRSF6|SNRNP70|SNRPC|SUPT6H|TAF10|ZPR1|SRSF11|PTBP3|RBM5|NCOA2|SRRM2|DCP1A|FASTKD5|HNRNPA3	-0.69
GO Biological Processes	GO:0032885	regulation of polysaccharide biosynthetic process	-3.4	AKT2|IGF1|INSR|SORBS1	-0.67
GO Biological Processes	GO:0046326	positive regulation of glucose import	-3.4	AKT2|IGF1|INSR|SORBS1	-0.67
GO Biological Processes	GO:0009636	response to toxic substance	-3.3	ESD|GPX3|PON1|SLC22A5|TXNRD1|PARK7|PRDX5|PRXL2A|TXNDC17	-0.66
GO Biological Processes	GO:0035521	monoubiquitinated histone deubiquitination	-3.2	ATXN7|TAF10|ENY2|TADA2B	-0.59
GO Biological Processes	GO:0035522	monoubiquitinated histone H2A deubiquitination	-3.2	ATXN7|TAF10|ENY2|TADA2B	-0.59
GO Biological Processes	GO:0033144	negative regulation of intracellular steroid hormone receptor signaling pathway	-3.2	BMAL1|DAB2|CLOCK|NCOR2	-0.57
GO Biological Processes	GO:0043467	regulation of generation of precursor metabolites and energy	-3.2	AKT2|FBP1|IGF1|INSR|SORBS1|PARK7|MLXIPL	-0.57
GO Biological Processes	GO:0008380	RNA splicing	-3.1	HNRNPA1|HNRNPA2B1|SRSF6|SNRNP70|SNRPC|SUPT6H|ZPR1|SRSF11|PTBP3|RBM5|SRRM2|HNRNPA3	-0.52
GO Biological Processes	GO:0010907	positive regulation of glucose metabolic process	-3.1	AKT2|IGF1|INSR|SORBS1	-0.52
GO Biological Processes	GO:0010828	positive regulation of glucose transmembrane transport	-3.1	AKT2|IGF1|INSR|SORBS1	-0.52
GO Biological Processes	GO:0010906	regulation of glucose metabolic process	-3.1	AKT2|FBP1|IGF1|INSR|NCOA2|SORBS1	-0.51
GO Biological Processes	GO:0032881	regulation of polysaccharide metabolic process	-3	AKT2|IGF1|INSR|SORBS1	-0.49
GO Biological Processes	GO:0006366	transcription by RNA polymerase II	-3	NFIC|POLR2I|SUPT6H|TAF10|NR1H4|NCOA2|HSF2BP|ELL2|ASH1L|ENY2|ELOF1	-0.49
GO Biological Processes	GO:0033143	regulation of intracellular steroid hormone receptor signaling pathway	-2.9	BMAL1|DAB2|CLOCK|NCOR2|PARK7	-0.44
GO Biological Processes	GO:0046395	carboxylic acid catabolic process	-2.9	KYAT1|HNMT|PHYH|PON1|FTCD|DECR2|DCXR|BDH2|NUDT7	-0.44
GO Biological Processes	GO:0035520	monoubiquitinated protein deubiquitination	-2.9	ATXN7|TAF10|ENY2|TADA2B	-0.44
GO Biological Processes	GO:0006397	mRNA processing	-2.9	HNRNPA1|HNRNPA2B1|SRSF6|SNRNP70|SNRPC|SUPT6H|ZPR1|SRSF11|PTBP3|RBM5|SRRM2|FASTKD5|HNRNPA3	-0.43
GO Biological Processes	GO:0045913	positive regulation of carbohydrate metabolic process	-2.9	AKT2|IGF1|INSR|SORBS1|MLXIPL	-0.43
GO Biological Processes	GO:0006749	glutathione metabolic process	-2.8	GGT1|GSTA4|PARK7|ETHE1	-0.38
GO Biological Processes	GO:0045834	positive regulation of lipid metabolic process	-2.8	AKT2|DAB2|POR|NR1H4|SORBS1|MLXIPL|PNPLA2	-0.38
GO Biological Processes	GO:0140053	mitochondrial gene expression	-2.8	MRPL13|AURKAIP1|FASTKD5|MRPS14|MRPL11|MTG1|MRPL52	-0.38
GO Biological Processes	GO:0045821	positive regulation of glycolytic process	-2.8	IGF1|INSR|MLXIPL	-0.38
GO Biological Processes	GO:0015986	proton motive force-driven ATP synthesis	-2.8	ATP5F1D|ATP5MC3|NDUFA3|NDUFA9|NDUFS4	-0.38
GO Biological Processes	GO:0032543	mitochondrial translation	-2.7	MRPL13|AURKAIP1|MRPS14|MRPL11|MTG1|MRPL52	-0.3
GO Biological Processes	GO:0006110	regulation of glycolytic process	-2.7	FBP1|IGF1|INSR|MLXIPL	-0.3
GO Biological Processes	GO:0046889	positive regulation of lipid biosynthetic process	-2.7	DAB2|POR|NR1H4|SORBS1|MLXIPL	-0.26
GO Biological Processes	GO:0010676	positive regulation of cellular carbohydrate metabolic process	-2.6	AKT2|IGF1|INSR|SORBS1	-0.24
GO Biological Processes	GO:0046324	regulation of glucose import	-2.6	AKT2|IGF1|INSR|SORBS1	-0.21
GO Biological Processes	GO:0006119	oxidative phosphorylation	-2.6	ATP5F1D|NDUFA3|NDUFA9|NDUFS4|UQCRH|CYCS	-0.2
GO Biological Processes	GO:0016578	histone deubiquitination	-2.6	ATXN7|TAF10|ENY2|TADA2B	-0.19
GO Biological Processes	GO:0006754	ATP biosynthetic process	-2.5	ATP5F1D|ATP5MC3|NDUFA3|NDUFA9|NDUFS4	-0.16
GO Biological Processes	GO:0019646	aerobic electron transport chain	-2.5	NDUFA3|NDUFA9|NDUFS4|UQCRH|CYCS	-0.15
GO Biological Processes	GO:0060765	regulation of androgen receptor signaling pathway	-2.5	DAB2|NCOR2|PARK7	-0.095
GO Biological Processes	GO:0043255	regulation of carbohydrate biosynthetic process	-2.4	AKT2|FBP1|IGF1|INSR|SORBS1	-0.095
GO Biological Processes	GO:0006109	regulation of carbohydrate metabolic process	-2.4	AKT2|FBP1|IGF1|INSR|NCOA2|SORBS1|MLXIPL	-0.095
GO Biological Processes	GO:0043470	regulation of carbohydrate catabolic process	-2.4	FBP1|IGF1|INSR|MLXIPL	-0.095
GO Biological Processes	GO:0042743	hydrogen peroxide metabolic process	-2.4	GPX3|PARK7|PRDX5	-0.075
GO Biological Processes	GO:0042773	ATP synthesis coupled electron transport	-2.4	NDUFA3|NDUFA9|NDUFS4|UQCRH|CYCS	-0.075
GO Biological Processes	GO:0042775	mitochondrial ATP synthesis coupled electron transport	-2.4	NDUFA3|NDUFA9|NDUFS4|UQCRH|CYCS	-0.075
GO Biological Processes	GO:0050684	regulation of mRNA processing	-2.4	HNRNPA1|HNRNPA2B1|SRSF6|SNRNP70|SUPT6H|RBM5	-0.065
GO Biological Processes	GO:0051346	negative regulation of hydrolase activity	-2.4	APOC1|ITIH1|POR|PTPA|PZP|PARK7|SLC39A14|PRDX5|NEIL1	-0.065
GO Biological Processes	GO:0009206	purine ribonucleoside triphosphate biosynthetic process	-2.4	ATP5F1D|ATP5MC3|NDUFA3|NDUFA9|NDUFS4	-0.06
GO Biological Processes	GO:0032148	activation of protein kinase B activity	-2.4	IGF1|INSR|PARK7	-0.06
GO Biological Processes	GO:0033119	negative regulation of RNA splicing	-2.4	HNRNPA2B1|SRSF6|PTBP3	-0.06
GO Biological Processes	GO:0019216	regulation of lipid metabolic process	-2.3	AKT2|APOC1|DAB2|FMO4|POR|NR1H4|NCOA2|SORBS1|MLXIPL|PNPLA2	-0.06
GO Biological Processes	GO:0009145	purine nucleoside triphosphate biosynthetic process	-2.3	ATP5F1D|ATP5MC3|NDUFA3|NDUFA9|NDUFS4	-0.06
GO Biological Processes	GO:0032787	monocarboxylic acid metabolic process	-2.3	NR5A2|GGT1|IGF1|PHYH|POR|NR1H4|FTCD|PARK7|DECR2|DCXR|BDH2|NUDT7	-0.06
GO Biological Processes	GO:0000398	mRNA splicing, via spliceosome	-2.3	HNRNPA1|HNRNPA2B1|SRSF6|SNRNP70|SNRPC|RBM5|SRRM2|HNRNPA3	-0.06
GO Biological Processes	GO:0000377	RNA splicing, via transesterification reactions with bulged adenosine as nucleophile	-2.3	HNRNPA1|HNRNPA2B1|SRSF6|SNRNP70|SNRPC|RBM5|SRRM2|HNRNPA3	-0.06
GO Biological Processes	GO:0043966	histone H3 acetylation	-2.3	ATXN7|TAF10|ENY2|TADA2B	-0.049
GO Biological Processes	GO:0000375	RNA splicing, via transesterification reactions	-2.3	HNRNPA1|HNRNPA2B1|SRSF6|SNRNP70|SNRPC|RBM5|SRRM2|HNRNPA3	-0.02
GO Biological Processes	GO:0046688	response to copper ion	-2.3	ATP5F1D|MT2A|PARK7	-0.0095
GO Biological Processes	GO:0043543	protein acylation	-2.3	POR|ATXN7|TAF10|CLOCK|ZDHHC1|ENY2|TADA2B	-0.0095
GO Biological Processes	GO:0009201	ribonucleoside triphosphate biosynthetic process	-2.2	ATP5F1D|ATP5MC3|NDUFA3|NDUFA9|NDUFS4	-0.0015
GO Biological Processes	GO:0048024	regulation of mRNA splicing, via spliceosome	-2.2	HNRNPA1|HNRNPA2B1|SRSF6|SNRNP70|RBM5	0
GO Biological Processes	GO:0010675	regulation of cellular carbohydrate metabolic process	-2.2	AKT2|FBP1|IGF1|INSR|NCOA2|SORBS1	0
GO Biological Processes	GO:0006473	protein acetylation	-2.2	POR|ATXN7|TAF10|CLOCK|ENY2|TADA2B	0
GO Biological Processes	GO:0042776	proton motive force-driven mitochondrial ATP synthesis	-2.2	ATP5F1D|NDUFA3|NDUFA9|NDUFS4	0
GO Biological Processes	GO:0055088	lipid homeostasis	-2.2	NR5A2|ABCB4|NR1H4|MLXIPL|PNPLA2|RCN3	0
GO Biological Processes	GO:0002673	regulation of acute inflammatory response	-2.2	IL6ST|PARK7|ASH1L	0
GO Biological Processes	GO:0050687	negative regulation of defense response to virus	-2.2	SEC14L1|TARBP2|ILRUN	0
GO Biological Processes	GO:1903580	positive regulation of ATP metabolic process	-2.2	IGF1|INSR|MLXIPL	0
GO Biological Processes	GO:0050688	regulation of defense response to virus	-2.1	SEC14L1|TARBP2|ZDHHC1|ILRUN	0
GO Biological Processes	GO:0007140	male meiotic nuclear division	-2.1	HSF2BP|MLH3|FIGNL1	0
GO Biological Processes	GO:0010827	regulation of glucose transmembrane transport	-2.1	AKT2|IGF1|INSR|SORBS1	0
GO Biological Processes	GO:1903578	regulation of ATP metabolic process	-2.1	FBP1|IGF1|INSR|MLXIPL	0
GO Biological Processes	GO:1905952	regulation of lipid localization	-2.1	AKT2|APOC1|DAB2|ABCB4|PON1|PNPLA2	0
GO Biological Processes	GO:0008286	insulin receptor signaling pathway	-2.1	AKT2|INSR|SORBS1|SLC39A14	0
GO Biological Processes	GO:0007143	female meiotic nuclear division	-2.1	HSF2BP|MLH3|NCAPH2	0
GO Biological Processes	GO:0072329	monocarboxylic acid catabolic process	-2.1	PHYH|DECR2|DCXR|BDH2|NUDT7	0
GO Biological Processes	GO:0006575	cellular modified amino acid metabolic process	-2.1	GGT1|GSTA4|POR|FTCD|PARK7|ETHE1	0
GO Biological Processes	GO:1905953	negative regulation of lipid localization	-2.1	AKT2|APOC1|PNPLA2	0
GO Biological Processes	GO:0046034	ATP metabolic process	-2.1	ATP5F1D|ATP5MC3|NDUFA3|NDUFA9|NDUFS4|FIGNL1	0
GO Biological Processes	GO:1900544	positive regulation of purine nucleotide metabolic process	-2	IGF1|INSR|MLXIPL	0
GO Biological Processes	GO:0045981	positive regulation of nucleotide metabolic process	-2	IGF1|INSR|MLXIPL	0
GO Biological Processes	GO:0051028	mRNA transport	-2	HNRNPA1|HNRNPA2B1|SUPT6H|ENY2|HNRNPA3	0
GO Biological Processes	GO:0009142	nucleoside triphosphate biosynthetic process	-2	ATP5F1D|ATP5MC3|NDUFA3|NDUFA9|NDUFS4	0
KEGG Pathway	hsa03010	Ribosome	-8.4	RPL9|RPL10|RPL12|RPL22|RPL34|RPS16|RPS18|RPS24|RPS25|MRPL13|MRPS14|MRPL11|RPL22L1	-4.2
KEGG Pathway	hsa05171	Coronavirus disease - COVID-19	-5.3	C4A|IL6ST|RPL9|RPL10|RPL12|RPL22|RPL34|RPS16|RPS18|RPS24|RPS25|RPL22L1	-2
KEGG Pathway	hsa05012	Parkinson disease	-4.3	ATP5F1D|ATP5MC3|NDUFA3|NDUFA9|NDUFS4|PSMA2|PSMB3|UBC|UQCRH|PARK7|SLC39A14|CYCS	-1.3
KEGG Pathway	hsa00190	Oxidative phosphorylation	-3.9	ATP5F1D|ATP5MC3|ATP6V0A1|NDUFA3|NDUFA9|NDUFS4|UQCRH|CYCS	-1
KEGG Pathway	hsa05014	Amyotrophic lateral sclerosis	-3.8	ATP5F1D|ATP5MC3|GPX3|HNRNPA1|HNRNPA2B1|NDUFA3|NDUFA9|NDUFS4|PSMA2|PSMB3|UQCRH|CYCS|HNRNPA3	-0.95
KEGG Pathway	hsa04932	Non-alcoholic fatty liver disease	-3.5	AKT2|INSR|NDUFA3|NDUFA9|NDUFS4|UQCRH|MLXIPL|CYCS	-0.72
KEGG Pathway	hsa05016	Huntington disease	-3.2	ATP5F1D|ATP5MC3|GPX3|NDUFA3|NDUFA9|NDUFS4|POLR2I|PSMA2|PSMB3|UQCRH|CYCS	-0.58
KEGG Pathway	hsa05415	Diabetic cardiomyopathy	-3.2	AKT2|ATP5F1D|ATP5MC3|INSR|NDUFA3|NDUFA9|NDUFS4|PTPA|UQCRH	-0.57
KEGG Pathway	hsa05208	Chemical carcinogenesis - reactive oxygen species	-3.1	ACP1|AKT2|ATP5F1D|ATP5MC3|GSTA4|NDUFA3|NDUFA9|NDUFS4|UQCRH	-0.52
KEGG Pathway	hsa00450	Selenocompound metabolism	-3	KYAT1|TXNRD1|SCLY	-0.45
KEGG Pathway	hsa05010	Alzheimer disease	-2.9	AKT2|ATP5F1D|ATP5MC3|INSR|NDUFA3|NDUFA9|NDUFS4|PSMA2|PSMB3|UQCRH|SLC39A14|CYCS	-0.41
KEGG Pathway	hsa05020	Prion disease	-2.5	ATP5F1D|ATP5MC3|NDUFA3|NDUFA9|NDUFS4|PSMA2|PSMB3|UQCRH|CYCS	-0.095
KEGG Pathway	hsa05022	Pathways of neurodegeneration - multiple diseases	-2.1	ATP5F1D|ATP5MC3|GPX3|NDUFA3|NDUFA9|NDUFS4|PSMA2|PSMB3|UBC|UQCRH|PARK7|CYCS	0
